# Supplementary material for: Reactions of a Dioxidomolybdenum(VI) Complex with Thionation Reagents—Formation of Mo(IV) Species with Sulfur Donors
Source: MDPI journal article supplement (doi:10.3390/molecules27217154), 2022-10-22

## checkCIF/PLATON report

Structure factors have been supplied for datablock(s) 3

THIS REPORT IS FOR GUIDANCE ONLY. IF USED AS PART OF A REVIEW PROCEDURE FOR PUBLICATION, IT SHOULD NOT REPLACE THE EXPERTISE OF AN EXPERIENCED CRYSTALLOGRAPHIC REFEREE.

No syntax errors found.      CIF dictionary      Interpreting this report

### Datablock: 3

---

|                        |                                   |                                    |                          |
|------------------------|-----------------------------------|------------------------------------|--------------------------|
| Bond precision:        | C-C = 0.0139 Å                    | Wavelength=1.54184                 |                          |
| Cell:                  | a=26.8402 (17)<br>alpha=90        | b=18.5045 (15)<br>beta=90          | c=9.4729 (7)<br>gamma=90 |
| Temperature:           | 125 K                             |                                    |                          |
|                        | Calculated                        | Reported                           |                          |
| Volume                 | 4704.9 (6)                        | 4704.8 (6)                         |                          |
| Space group            | P 21 21 2                         | P 21 21 2                          |                          |
| Hall group             | P 2 2ab                           | P 2 2ab                            |                          |
| Moiety formula         | C43 H57 Mo N2 O3 P S3, C2<br>H3 N | C43 H57 Mo N2 O3 P S3, C2<br>H3 N1 |                          |
| Sum formula            | C45 H60 Mo N3 O3 P S3             | C45 H60 Mo N3 O3 P S3              |                          |
| Mr                     | 914.05                            | 914.05                             |                          |
| Dx, g cm <sup>-3</sup> | 1.290                             | 1.290                              |                          |
| Z                      | 4                                 | 4                                  |                          |
| Mu (mm <sup>-1</sup> ) | 4.158                             | 4.158                              |                          |
| F000                   | 1920.0                            | 1920.0                             |                          |
| F000'                  | 1928.92                           |                                    |                          |
| h, k, lmax             | 32, 22, 11                        | 32, 22, 11                         |                          |
| Nref                   | 8621 [ 4826]                      | 7781                               |                          |
| Tmin, Tmax             | 0.670, 0.847                      | 0.210, 1.000                       |                          |
| Tmin'                  | 0.274                             |                                    |                          |

Correction method= # Reported T Limits: Tmin=0.210 Tmax=1.000  
AbsCorr = GAUSSIAN

Data completeness= 1.61/0.90      Theta(max)= 68.251

|                                |                                     |
|--------------------------------|-------------------------------------|
| R(reflections)= 0.0585 ( 6707) | wR2(reflections)=<br>0.1704 ( 7781) |
| S = 1.060                      | Npar= 548                           |

---

The following ALERTS were generated. Each ALERT has the format

**test-name\_ALERT\_alert-type\_alert-level.**

Click on the hyperlinks for more details of the test.

---

### ● Alert level C

|                   |                                                   |              |
|-------------------|---------------------------------------------------|--------------|
| PLAT042_ALERT_1_C | Calc. and Reported MoietyFormula Strings Differ   | Please Check |
| PLAT213_ALERT_2_C | Atom C23 has ADP max/min Ratio .....              | 3.4 prolat   |
| PLAT220_ALERT_2_C | NonSolvent Resd 1 C Ueq(max)/Ueq(min) Range       | 5.1 Ratio    |
| PLAT222_ALERT_3_C | NonSolvent Resd 1 H Uiso(max)/Uiso(min) Range     | 5.7 Ratio    |
| PLAT242_ALERT_2_C | Low 'MainMol' Ueq as Compared to Neighbors of C20 | Check        |
| PLAT342_ALERT_3_C | Low Bond Precision on C-C Bonds .....             | 0.01393 Ang. |
| PLAT911_ALERT_3_C | Missing FCF Refl Between Thmin & STh/L= 0.600     | 47 Report    |
| PLAT915_ALERT_3_C | No Flack x Check Done: Low Friedel Pair Coverage  | 79 %         |
| PLAT971_ALERT_2_C | Check Calcd Resid. Dens. 1.14Ang From N38         | 1.55 eA-3    |
| PLAT971_ALERT_2_C | Check Calcd Resid. Dens. 0.99Ang From Mol         | 1.52 eA-3    |
| PLAT975_ALERT_2_C | Check Calcd Resid. Dens. 0.61Ang From O1          | 0.61 eA-3    |
| PLAT975_ALERT_2_C | Check Calcd Resid. Dens. 0.73Ang From O2          | 0.56 eA-3    |
| PLAT977_ALERT_2_C | Check Negative Difference Density on H21B         | -0.45 eA-3   |

---

### ● Alert level G

|                   |                                                  |             |
|-------------------|--------------------------------------------------|-------------|
| PLAT002_ALERT_2_G | Number of Distance or Angle Restraints on AtSite | 9 Note      |
| PLAT003_ALERT_2_G | Number of Uiso or Uij Restrained non-H Atoms ... | 7 Report    |
| PLAT072_ALERT_2_G | SHELXL First Parameter in WGHT Unusually Large   | 0.10 Report |
| PLAT171_ALERT_4_G | The CIF-Embedded .res File Contains EADP Records | 2 Report    |
| PLAT172_ALERT_4_G | The CIF-Embedded .res File Contains DFIX Records | 6 Report    |
| PLAT186_ALERT_4_G | The CIF-Embedded .res File Contains ISOR Records | 3 Report    |
| PLAT300_ALERT_4_G | Atom Site Occupancy of N46A Constrained at       | 0.7 Check   |
| PLAT300_ALERT_4_G | Atom Site Occupancy of C47A Constrained at       | 0.7 Check   |
| PLAT300_ALERT_4_G | Atom Site Occupancy of C48A Constrained at       | 0.7 Check   |
| PLAT300_ALERT_4_G | Atom Site Occupancy of H48A Constrained at       | 0.7 Check   |
| PLAT300_ALERT_4_G | Atom Site Occupancy of H48B Constrained at       | 0.7 Check   |
| PLAT300_ALERT_4_G | Atom Site Occupancy of H48C Constrained at       | 0.7 Check   |
| PLAT300_ALERT_4_G | Atom Site Occupancy of N46B Constrained at       | 0.15 Check  |
| PLAT300_ALERT_4_G | Atom Site Occupancy of C47B Constrained at       | 0.15 Check  |
| PLAT300_ALERT_4_G | Atom Site Occupancy of C48B Constrained at       | 0.15 Check  |
| PLAT300_ALERT_4_G | Atom Site Occupancy of H48G Constrained at       | 0.15 Check  |
| PLAT300_ALERT_4_G | Atom Site Occupancy of H48H Constrained at       | 0.15 Check  |
| PLAT300_ALERT_4_G | Atom Site Occupancy of H48I Constrained at       | 0.15 Check  |
| PLAT300_ALERT_4_G | Atom Site Occupancy of N46C Constrained at       | 0.15 Check  |
| PLAT300_ALERT_4_G | Atom Site Occupancy of C47C Constrained at       | 0.15 Check  |
| PLAT300_ALERT_4_G | Atom Site Occupancy of C48C Constrained at       | 0.15 Check  |
| PLAT300_ALERT_4_G | Atom Site Occupancy of H48D Constrained at       | 0.15 Check  |
| PLAT300_ALERT_4_G | Atom Site Occupancy of H48E Constrained at       | 0.15 Check  |
| PLAT300_ALERT_4_G | Atom Site Occupancy of H48F Constrained at       | 0.15 Check  |
| PLAT302_ALERT_4_G | Anion/Solvent/Minor-Residue Disorder (Resd 2 )   | 100% Note   |
| PLAT302_ALERT_4_G | Anion/Solvent/Minor-Residue Disorder (Resd 3 )   | 100% Note   |
| PLAT302_ALERT_4_G | Anion/Solvent/Minor-Residue Disorder (Resd 4 )   | 100% Note   |
| PLAT304_ALERT_4_G | Non-Integer Number of Atoms in ..... (Resd 2 )   | 4.20 Check  |
| PLAT304_ALERT_4_G | Non-Integer Number of Atoms in ..... (Resd 3 )   | 0.90 Check  |
| PLAT304_ALERT_4_G | Non-Integer Number of Atoms in ..... (Resd 4 )   | 0.90 Check  |
| PLAT413_ALERT_2_G | Short Inter XH3 .. XHn H23C ..H48F               | 1.82 Ang.   |
|                   | $1/2-x, -1/2+y, 2-z =$                           | 4_547 Check |
| PLAT432_ALERT_2_G | Short Inter X...Y Contact C23 ..C48C             | 3.14 Ang.   |
|                   | $1/2-x, -1/2+y, 2-z =$                           | 4_547 Check |

|                   |                                                  |       |         |   |       |       |
|-------------------|--------------------------------------------------|-------|---------|---|-------|-------|
| PLAT432_ALERT_2_G | Short Inter X...Y Contact                        | C35   | ..C48C  | . | 3.08  | Ang.  |
|                   |                                                  |       | x,y,z = |   | 1_555 | Check |
| PLAT432_ALERT_2_G | Short Inter X...Y Contact                        | C36   | ..C48C  | . | 3.18  | Ang.  |
|                   |                                                  |       | x,y,z = |   | 1_555 | Check |
| PLAT789_ALERT_4_G | Atoms with Negative _atom_site_disorder_group    | #     |         |   | 12    | Check |
| PLAT794_ALERT_5_G | Tentative Bond Valency for Mol                   | (V)   |         | . | 4.67  | Info  |
| PLAT860_ALERT_3_G | Number of Least-Squares Restraints               | ..... |         |   | 48    | Note  |
| PLAT933_ALERT_2_G | Number of HKL-OMIT Records in Embedded .res File |       |         |   | 4     | Note  |
| PLAT941_ALERT_3_G | Average HKL Measurement Multiplicity             | ..... |         |   | 3.5   | Low   |
| PLAT978_ALERT_2_G | Number C-C Bonds with Positive Residual Density. |       |         |   | 0     | Info  |

---

0 **ALERT level A** = Most likely a serious problem - resolve or explain  
 0 **ALERT level B** = A potentially serious problem, consider carefully  
 13 **ALERT level C** = Check. Ensure it is not caused by an omission or oversight  
 40 **ALERT level G** = General information/check it is not something unexpected

1 ALERT type 1 CIF construction/syntax error, inconsistent or missing data  
 17 ALERT type 2 Indicator that the structure model may be wrong or deficient  
 6 ALERT type 3 Indicator that the structure quality may be low  
 28 ALERT type 4 Improvement, methodology, query or suggestion  
 1 ALERT type 5 Informative message, check

---

It is advisable to attempt to resolve as many as possible of the alerts in all categories. Often the minor alerts point to easily fixed oversights, errors and omissions in your CIF or refinement strategy, so attention to these fine details can be worthwhile. In order to resolve some of the more serious problems it may be necessary to carry out additional measurements or structure refinements. However, the purpose of your study may justify the reported deviations and the more serious of these should normally be commented upon in the discussion or experimental section of a paper or in the "special\_details" fields of the CIF. checkCIF was carefully designed to identify outliers and unusual parameters, but every test has its limitations and alerts that are not important in a particular case may appear. Conversely, the absence of alerts does not guarantee there are no aspects of the results needing attention. It is up to the individual to critically assess their own results and, if necessary, seek expert advice.

### Publication of your CIF in IUCr journals

A basic structural check has been run on your CIF. These basic checks will be run on all CIFs submitted for publication in IUCr journals (*Acta Crystallographica*, *Journal of Applied Crystallography*, *Journal of Synchrotron Radiation*); however, if you intend to submit to *Acta Crystallographica Section C* or *E* or *IUCrData*, you should make sure that full publication checks are run on the final version of your CIF prior to submission.

### Publication of your CIF in other journals

Please refer to the *Notes for Authors* of the relevant journal for any special instructions relating to CIF submission.

PLATON version of 18/05/2022; check.def file version of 17/05/2022

Datablock 3 - ellipsoid plot

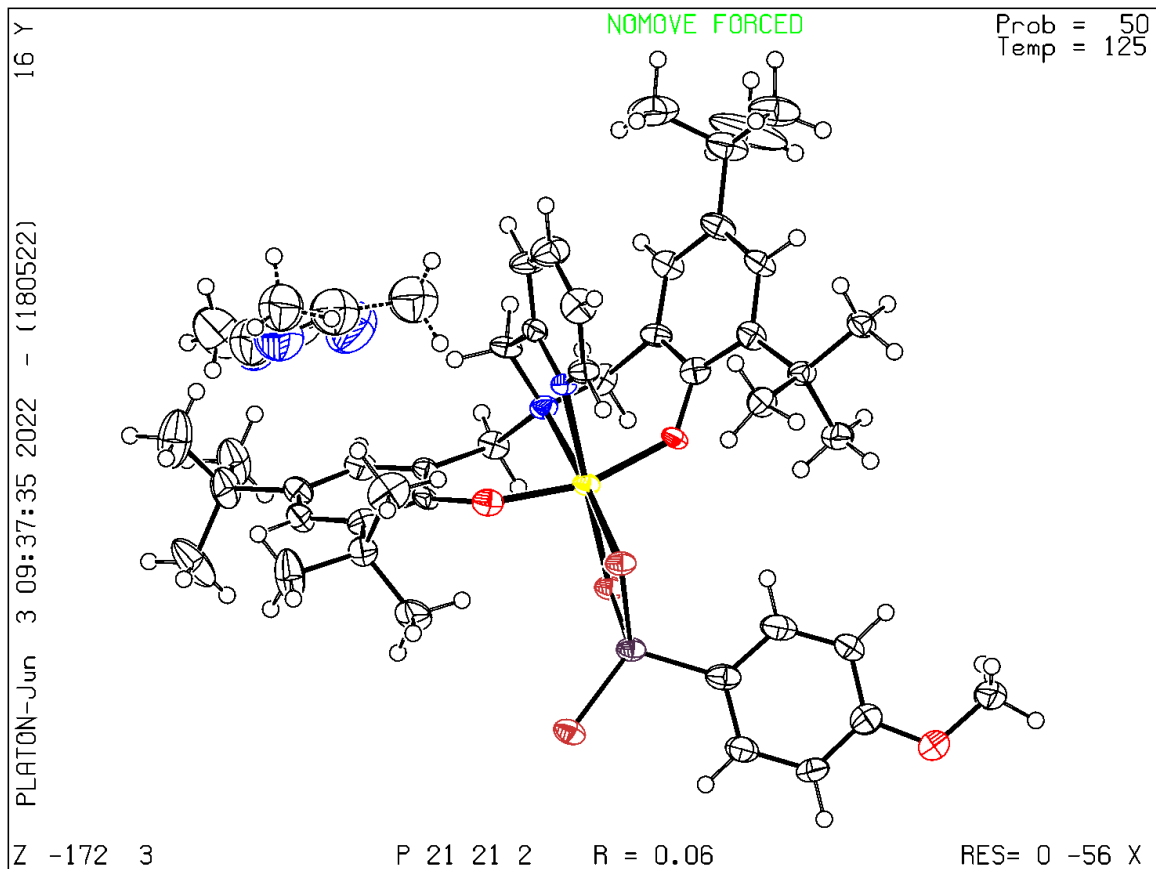

Supplement: s1 [file s1]
