# Supplementary material for: Reactions of a Dioxidomolybdenum(VI) Complex with Thionation Reagents—Formation of Mo(IV) Species with Sulfur Donors
Source: MDPI journal article supplement (doi:10.3390/molecules27217154), 2022-10-22
Supplement: s1 [file s1]

## Supporting information for:

### Reactions of a dioxidomolybdenum(VI) complex with thionation reagents - formation of Mo(IV) species with sulfur donors

Esko Salojärvi,<sup>a</sup> Anssi Peuronen,<sup>a</sup> Narhari Sapkota<sup>a</sup> and Ari Lehtonen<sup>\*a</sup>

<sup>a</sup>Intelligent Materials Chemistry group, Department of Chemistry, University of Turku, FI-20014 Turku, Finland

#### Content:

**Table S1.** Crystallographic data for complexes **2** and **3**.

**Table S2.** Shape measures of complexes **2** and **3** for ML<sub>6</sub> structures.

**Table S3.** Calculated single point energies for complexes **2** and **3** (PBE0/def2-TZVP).

**Figure S1.** Selected Mulliken spin populations for the excited triplet states of complexes.

**Table S4.** xyz-coordinates for DFT calculations.

**Figure S2.** The <sup>1</sup>H spectrum of **2**.

**Figure S3.** The <sup>13</sup>C spectrum of **2**.

**Figure S4.** The <sup>1</sup>H spectrum of **3**.

**Figure S5.** The <sup>13</sup>C NMR spectrum of **3**.

**Table S1.** Crystallographic data for complexes **2** and **3**.

| Identification code                                          | <b>2</b>                                                                       | <b>3</b>                                                                        |
|--------------------------------------------------------------|--------------------------------------------------------------------------------|---------------------------------------------------------------------------------|
| Empirical formula                                            | C <sub>36</sub> H <sub>50</sub> MoN <sub>2</sub> O <sub>2</sub> S <sub>4</sub> | C <sub>45</sub> H <sub>60</sub> MoN <sub>3</sub> O <sub>3</sub> PS <sub>3</sub> |
| Formula weight                                               | 766.96                                                                         | 914.05                                                                          |
| Temperature/K                                                | 125.0(1)                                                                       | 125.0(1)                                                                        |
| Crystal system                                               | triclinic                                                                      | orthorhombic                                                                    |
| Space group                                                  | <i>P</i> −1                                                                    | <i>P</i> 2 <sub>1</sub> 2 <sub>1</sub> 2                                        |
| <i>a</i> /Å                                                  | 10.0273(2)                                                                     | 26.8402(17)                                                                     |
| <i>b</i> /Å                                                  | 10.0625(3)                                                                     | 18.5045(15)                                                                     |
| <i>c</i> /Å                                                  | 19.4957(3)                                                                     | 9.4729(7)                                                                       |
| $\alpha$ /°                                                  | 101.1045(17)                                                                   | 90                                                                              |
| $\beta$ /°                                                   | 96.0498(14)                                                                    | 90                                                                              |
| $\gamma$ /°                                                  | 101.0893(19)                                                                   | 90                                                                              |
| Volume/Å <sup>3</sup>                                        | 1873.41(7)                                                                     | 4704.8(6)                                                                       |
| <i>Z</i>                                                     | 2                                                                              | 4                                                                               |
| $\rho_{\text{calc}}$ /cm <sup>3</sup>                        | 1.36                                                                           | 1.29                                                                            |
| $\mu$ /mm <sup>−1</sup>                                      | 5.199                                                                          | 4.158                                                                           |
| <i>F</i> (000)                                               | 804                                                                            | 1920                                                                            |
| Crystal size/mm <sup>3</sup>                                 | 0.22 × 0.19 × 0.16                                                             | 0.30 × 0.09 × 0.04                                                              |
| Radiation                                                    | Cu K $\alpha$ ( $\lambda$ = 1.54184)                                           | Cu K $\alpha$ ( $\lambda$ = 1.54184)                                            |
| 2 $\theta$ range for data collection/°                       | 4.67 to 144.234                                                                | 5.802 to 136.502                                                                |
| Index ranges                                                 | −12 ≤ <i>h</i> ≤ 12, −12 ≤ <i>k</i> ≤ 12, −17 ≤ <i>l</i> ≤ 24                  | −32 ≤ <i>h</i> ≤ 32, −21 ≤ <i>k</i> ≤ 22, −11 ≤ <i>l</i> ≤ 11                   |
| Reflections collected                                        | 21711                                                                          | 16605                                                                           |
| Independent reflections                                      | 7327 [ <i>R</i> <sub>int</sub> = 0.0562, <i>R</i> <sub>sigma</sub> = 0.0476]   | 7781 [ <i>R</i> <sub>int</sub> = 0.0836, <i>R</i> <sub>sigma</sub> = 0.1003]    |
| Data/restraints/parameters                                   | 7327/0/437                                                                     | 7781/48/548                                                                     |
| Goodness-of-fit on <i>F</i> <sup>2</sup>                     | 1.036                                                                          | 1.06                                                                            |
| Final <i>R</i> indexes [ <i>I</i> ≥ 2 $\sigma$ ( <i>I</i> )] | <i>R</i> <sub>1</sub> = 0.0363, <i>wR</i> <sub>2</sub> = 0.0966                | <i>R</i> <sub>1</sub> = 0.0585, <i>wR</i> <sub>2</sub> = 0.1528                 |
| Final <i>R</i> indexes [all data]                            | <i>R</i> <sub>1</sub> = 0.0381, <i>wR</i> <sub>2</sub> = 0.0979                | <i>R</i> <sub>1</sub> = 0.0705, <i>wR</i> <sub>2</sub> = 0.1704                 |
| Largest diff. peak/hole / e Å <sup>−3</sup>                  | 0.89/−0.77                                                                     | 1.50/−1.02                                                                      |
| Flack parameter                                              |                                                                                | −0.026(13)                                                                      |

**Table S2.** Shape measures of complexes **2** and **3** for ML<sub>6</sub> structures.<sup>a</sup>

|          | HP-6   | PPY-6  | OC-6  | TPR-6  | JPPY-6 |
|----------|--------|--------|-------|--------|--------|
| <b>2</b> | 31.233 | 27.116 | 1.476 | 15.507 | 29.626 |
| <b>3</b> | 28.892 | 25.782 | 2.306 | 15.350 | 28.055 |

<sup>a</sup> HP-6 =  $D_{6h}$  hexagon, PPY-6 =  $C_{5v}$  pentagonal pyramid, OC-6 =  $O_h$  octahedron, TPR-6 =  $D_{3h}$  trigonal prism, JPPY-6 =  $C_{5v}$  Johnson pentagonal pyramid J2

**Table S3.** Calculated single point energies for complexes **2** and **3** (PBE0/def2-TZVP).

|          | Singlet ( $E_h$ ) | Triplet ( $E_h$ ) | Singlet-triplet gap (kJ mol <sup>-1</sup> ) |
|----------|-------------------|-------------------|---------------------------------------------|
| <b>2</b> | -3321.194852      | -3321.155574      | 103.1                                       |
| <b>3</b> | -3610.295090      | -3610.281677      | 35.2                                        |

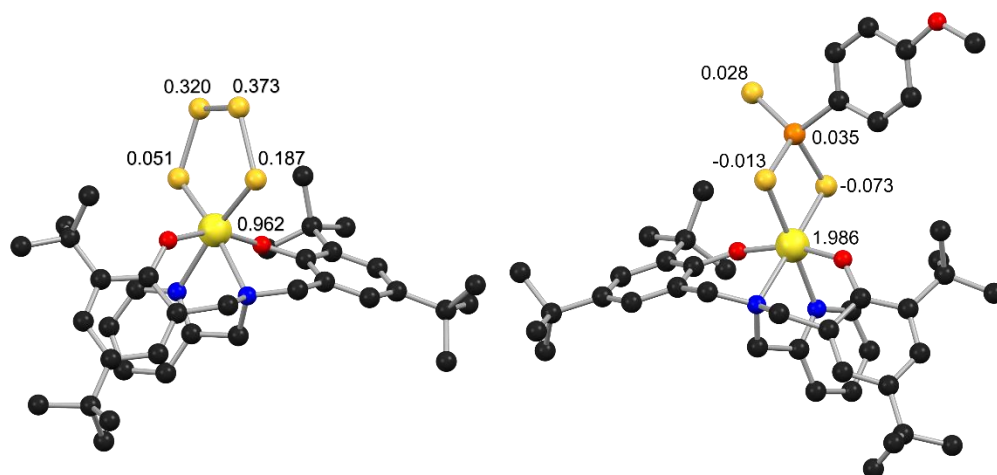**Figure S1.** Selected Mulliken spin populations for the excited triplet states of complexes complex **2** (left) and **3** (right).

**Table S4.** xyz-coordinates for DFT calculations.**Complex 2**

|    |           |           |           |   |           |           |           |
|----|-----------|-----------|-----------|---|-----------|-----------|-----------|
| Mo | 2.799682  | 0.788699  | 4.673113  | H | -2.124640 | 4.132587  | 9.270612  |
| S  | 4.765659  | 1.307059  | 3.768157  | C | -0.197599 | 6.928836  | 8.814378  |
| S  | 3.486921  | -1.101578 | 5.617990  | H | -0.982808 | 7.634945  | 9.080420  |
| S  | 6.315852  | -0.150734 | 4.018662  | H | 0.387646  | 7.331532  | 7.989002  |
| S  | 5.649959  | -1.467515 | 5.363891  | H | 0.451181  | 6.766798  | 9.673883  |
| O  | 2.892569  | 1.887034  | 6.265820  | C | -1.761899 | 5.886176  | 7.201426  |
| O  | 2.032169  | -0.020164 | 3.115976  | H | -2.296637 | 4.974376  | 6.939517  |
| N  | 0.551577  | 0.593532  | 5.287832  | H | -1.174342 | 6.220466  | 6.347642  |
| N  | 1.755441  | 2.696396  | 3.898140  | H | -2.477485 | 6.660168  | 7.474911  |
| C  | 2.074697  | 2.754464  | 6.898702  | C | -1.836413 | -3.962218 | 1.716445  |
| C  | 2.547392  | 3.978135  | 7.401413  | C | -1.741676 | -4.371089 | 0.245585  |
| C  | 1.585080  | 4.863838  | 7.892016  | H | -1.848836 | -3.488891 | -0.383831 |
| H  | 1.917312  | 5.835275  | 8.255131  | H | -2.534184 | -5.081104 | 0.013789  |
| C  | 0.215442  | 4.572968  | 7.943100  | H | -0.773563 | -4.833730 | 0.059463  |
| C  | -0.184081 | 3.301535  | 7.548045  | C | -1.672306 | -5.216680 | 2.588480  |
| H  | -1.232118 | 3.018409  | 7.633936  | H | -0.678476 | -5.635818 | 2.438326  |
| C  | 0.729290  | 2.387715  | 7.046280  | H | -2.422743 | -5.954531 | 2.308585  |
| C  | 0.339213  | 0.973463  | 6.720284  | H | -1.799133 | -4.950000 | 3.636677  |
| H  | 0.915900  | 0.297566  | 7.349980  | C | -3.241730 | -3.394940 | 1.957300  |
| H  | -0.712677 | 0.835334  | 6.965985  | H | -3.352027 | -3.133798 | 3.008756  |
| C  | 0.093432  | -0.817701 | 5.142714  | H | -3.986354 | -4.142707 | 1.688412  |
| H  | -0.937810 | -0.880189 | 5.487032  | H | -3.383149 | -2.505012 | 1.345785  |
| H  | 0.695375  | -1.443760 | 5.799703  | C | 2.264307  | -1.131284 | 0.506495  |
| C  | 0.163352  | -1.387107 | 3.745075  | C | 2.277272  | 0.385805  | 0.292886  |
| C  | -0.774836 | -2.344807 | 3.368940  | H | 1.277276  | 0.723085  | 0.024241  |
| H  | -1.538891 | -2.646002 | 4.084078  | H | 2.971599  | 0.633312  | -0.508720 |
| C  | -0.764491 | -2.927268 | 2.109230  | H | 2.592274  | 0.878755  | 1.211414  |
| C  | 0.230458  | -2.525722 | 1.222816  | C | 3.647262  | -1.592576 | 1.006368  |
| H  | 0.263665  | -2.994903 | 0.240631  | H | 3.848793  | -1.147210 | 1.979485  |
| C  | 1.190689  | -1.550161 | 1.523459  | H | 4.412453  | -1.279418 | 0.297612  |
| C  | 1.139985  | -0.987614 | 2.810414  | H | 3.657495  | -2.677909 | 1.095073  |
| C  | 4.051329  | 4.302453  | 7.452498  | C | 2.018747  | -1.773504 | -0.865791 |
| C  | 4.311652  | 5.579368  | 8.260393  | H | 2.026570  | -2.857909 | -0.766157 |
| H  | 3.877700  | 5.475310  | 9.253760  | H | 2.804040  | -1.466564 | -1.555011 |
| H  | 3.856714  | 6.428790  | 7.753012  | H | 1.052336  | -1.450470 | -1.250004 |
| H  | 5.384911  | 5.741647  | 8.348154  | C | -0.266395 | 1.477710  | 4.420149  |
| C  | 4.808250  | 3.153606  | 8.134762  | H | -1.215338 | 1.683121  | 4.913336  |
| H  | 4.688833  | 2.242835  | 7.549821  | H | -0.480211 | 0.961710  | 3.485298  |
| H  | 4.405935  | 2.997723  | 9.134645  | C | 0.420291  | 2.771294  | 4.119696  |
| H  | 5.865570  | 3.405115  | 8.203602  | C | -0.278044 | 3.961960  | 4.019040  |
| C  | 4.605829  | 4.516030  | 6.033101  | H | -1.348381 | 3.986026  | 4.218342  |
| H  | 5.653159  | 4.808488  | 6.092185  | C | 0.390100  | 5.121664  | 3.663718  |
| H  | 4.037348  | 5.301141  | 5.536764  | H | -0.142724 | 6.067645  | 3.579222  |
| H  | 4.517669  | 3.590625  | 5.465851  | C | 1.754138  | 5.050204  | 3.417944  |
| C  | -0.824288 | 5.607560  | 8.394916  | H | 2.314048  | 5.939215  | 3.131445  |
| C  | -1.635670 | 5.058786  | 9.568917  | C | 2.389636  | 3.828324  | 3.543385  |
| H  | -2.389004 | 5.788365  | 9.862384  | H | 3.459308  | 3.780513  | 3.344799  |
| H  | -0.971979 | 4.864019  | 10.410048 |   |           |           |           |

**Complex 3**

|    |          |           |          |   |           |           |          |
|----|----------|-----------|----------|---|-----------|-----------|----------|
| Mo | 6.033677 | 8.230802  | 5.352662 | O | 4.482313  | 7.712676  | 6.321266 |
| S  | 5.004087 | 8.386795  | 3.215102 | O | 7.775606  | 8.227101  | 4.636037 |
| S  | 5.690659 | 10.577172 | 5.263143 | O | -0.799838 | 12.172260 | 3.244468 |
| S  | 5.907260 | 11.462798 | 1.924893 | N | 6.999924  | 7.990243  | 7.356654 |
| P  | 4.928398 | 10.481689 | 3.308884 | N | 6.559745  | 6.004710  | 5.456390 |

|   |           |           |           |
|---|-----------|-----------|-----------|
| C | 4.197807  | 6.787451  | 7.271398  |
| C | 4.605778  | 4.522500  | 8.036808  |
| H | 5.003365  | 3.524513  | 7.858295  |
| C | 3.465070  | 7.090924  | 8.436565  |
| C | 3.406021  | 6.060224  | 9.397117  |
| H | 2.857384  | 6.257883  | 10.316817 |
| C | 3.996506  | 4.809320  | 9.253129  |
| C | 4.710455  | 5.471781  | 7.067731  |
| C | 5.343884  | 5.181260  | 5.715001  |
| H | 5.612085  | 4.126835  | 5.668338  |
| H | 4.611139  | 5.372714  | 4.932472  |
| C | 7.107285  | 5.532845  | 4.136815  |
| H | 6.391705  | 5.776241  | 3.352835  |
| H | 7.209754  | 4.449081  | 4.166394  |
| C | 8.446611  | 6.141644  | 3.782529  |
| C | 9.428962  | 5.373707  | 3.139319  |
| H | 9.227433  | 4.320030  | 2.952044  |
| C | 10.623351 | 5.891833  | 2.738615  |
| C | 10.872965 | 7.238960  | 3.044590  |
| H | 11.832728 | 7.663507  | 2.753838  |
| C | 9.955030  | 8.066112  | 3.701062  |
| C | 8.723065  | 7.472117  | 4.028824  |
| C | 7.563568  | 5.762301  | 6.516408  |
| H | 8.560635  | 5.820940  | 6.082427  |
| H | 7.430837  | 4.756007  | 6.910964  |
| C | 7.458892  | 6.754143  | 7.646525  |
| C | 7.016028  | 8.906216  | 8.328574  |
| H | 6.672720  | 9.911858  | 8.090365  |
| C | 7.437419  | 8.656405  | 9.606468  |
| H | 7.412554  | 9.435428  | 10.367011 |
| C | 7.885651  | 7.403650  | 9.900128  |
| H | 8.230666  | 7.171999  | 10.906718 |
| C | 7.904439  | 6.422912  | 8.920630  |
| H | 8.258058  | 5.417439  | 9.144009  |
| C | 2.726964  | 8.404744  | 8.632654  |
| C | 1.924442  | 8.443603  | 9.948440  |
| H | 2.608890  | 8.383203  | 10.793309 |
| H | 1.234880  | 7.601276  | 9.978599  |
| H | 1.363010  | 9.375082  | 10.003785 |
| C | 3.703948  | 9.594583  | 8.661072  |
| H | 3.157816  | 10.505736 | 8.900782  |
| H | 4.175016  | 9.701462  | 7.685064  |
| H | 4.468222  | 9.420207  | 9.416981  |
| C | 1.723141  | 8.584238  | 7.462751  |
| H | 1.016604  | 7.755550  | 7.460969  |
| H | 2.266500  | 8.602079  | 6.519160  |
| H | 1.184947  | 9.522529  | 7.588755  |
| C | 3.975034  | 3.769367  | 10.373773 |
| C | 5.443193  | 3.356716  | 10.661749 |
| H | 5.462987  | 2.634994  | 11.477007 |

|   |           |           |           |
|---|-----------|-----------|-----------|
| H | 6.019405  | 4.237318  | 10.941821 |
| H | 5.874946  | 2.907267  | 9.768718  |
| C | 3.497278  | 4.341156  | 11.695242 |
| H | 2.457130  | 4.649840  | 11.601822 |
| H | 4.108311  | 5.203012  | 11.959372 |
| H | 3.582912  | 3.582768  | 12.472054 |
| C | 3.247664  | 2.542518  | 9.951281  |
| H | 3.707691  | 2.141438  | 9.049378  |
| H | 2.206138  | 2.788162  | 9.749281  |
| H | 3.298747  | 1.798667  | 10.745005 |
| C | 11.729167 | 5.062831  | 2.022464  |
| C | 12.102246 | 5.751199  | 0.709520  |
| H | 11.212236 | 5.862843  | 0.091994  |
| H | 12.838882 | 5.149166  | 0.179571  |
| H | 12.520645 | 6.734064  | 0.921270  |
| C | 12.963817 | 4.990664  | 2.909128  |
| H | 13.353705 | 5.995011  | 3.067854  |
| H | 13.722392 | 4.377472  | 2.424896  |
| H | 12.695242 | 4.549873  | 3.868029  |
| C | 11.259464 | 3.660190  | 1.691860  |
| H | 10.977566 | 3.145668  | 2.609314  |
| H | 12.065911 | 3.114407  | 1.204331  |
| H | 10.400741 | 3.711100  | 1.024084  |
| C | 10.269061 | 9.539070  | 4.029772  |
| C | 10.212696 | 9.733367  | 5.555856  |
| H | 9.205729  | 9.520854  | 5.911914  |
| H | 10.473059 | 10.761964 | 5.801051  |
| H | 10.917438 | 9.055500  | 6.035185  |
| C | 11.635227 | 9.955421  | 3.537181  |
| H | 12.400955 | 9.415411  | 4.092132  |
| H | 11.764852 | 11.026335 | 3.686383  |
| H | 11.724477 | 9.723246  | 2.476969  |
| C | 9.233029  | 10.464295 | 3.378983  |
| H | 9.253846  | 10.331058 | 2.298365  |
| H | 9.466763  | 11.499949 | 3.621285  |
| H | 8.240408  | 10.220181 | 3.754528  |
| C | 3.199352  | 11.008327 | 3.331619  |
| C | 2.335097  | 10.630835 | 4.363218  |
| H | 2.730131  | 10.037734 | 5.186687  |
| C | 1.001139  | 10.980570 | 4.374585  |
| H | 0.356270  | 10.664608 | 5.193263  |
| C | 0.493860  | 11.742956 | 3.329724  |
| C | 1.323222  | 12.144503 | 2.294336  |
| H | 0.923413  | 12.743975 | 1.477815  |
| C | 2.659864  | 11.785516 | 2.296231  |
| H | 3.302886  | 12.111728 | 1.480125  |
| C | -1.707037 | 11.705947 | 4.235334  |
| H | -2.711322 | 12.056312 | 4.001720  |
| H | -1.407790 | 12.085147 | 5.211335  |
| H | -1.698691 | 10.617083 | 4.250430  |

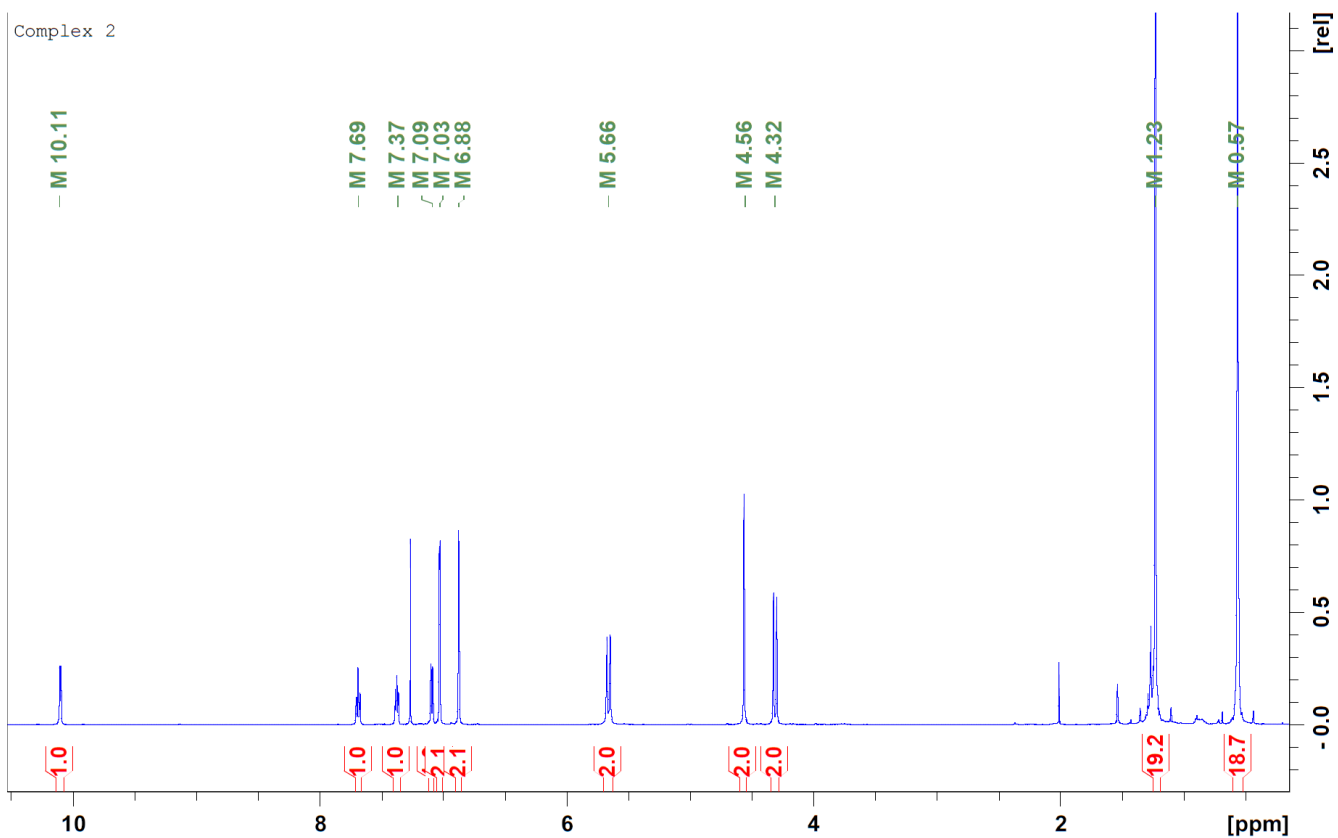

**Figure S2.** The  $^1\text{H}$  spectrum of **2**. Peaks at 2.1 and 1.56 ppm are due to the acetonitrile of crystallization and water impurity in the NMR solvent, respectively.

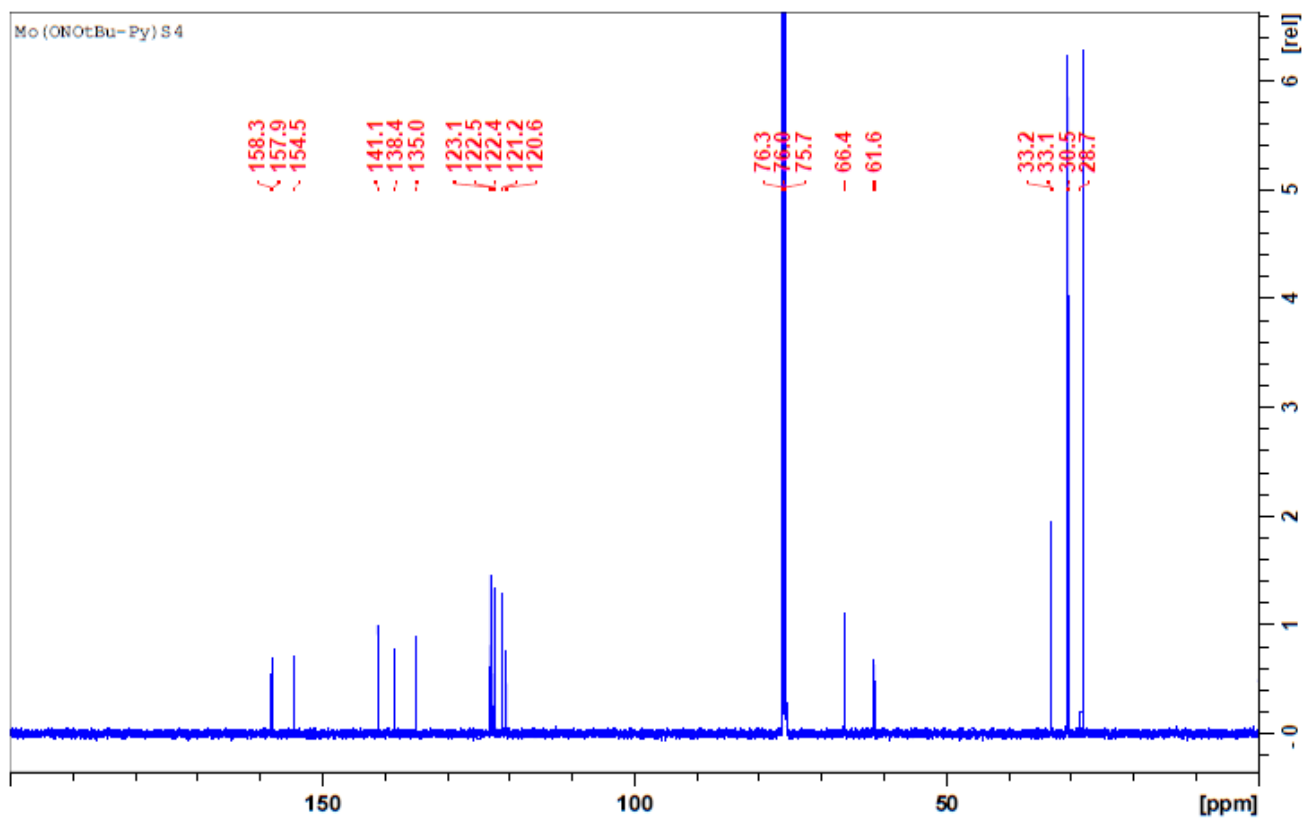

**Figure S3.** The  $^{13}\text{C}$  spectrum of **2**.

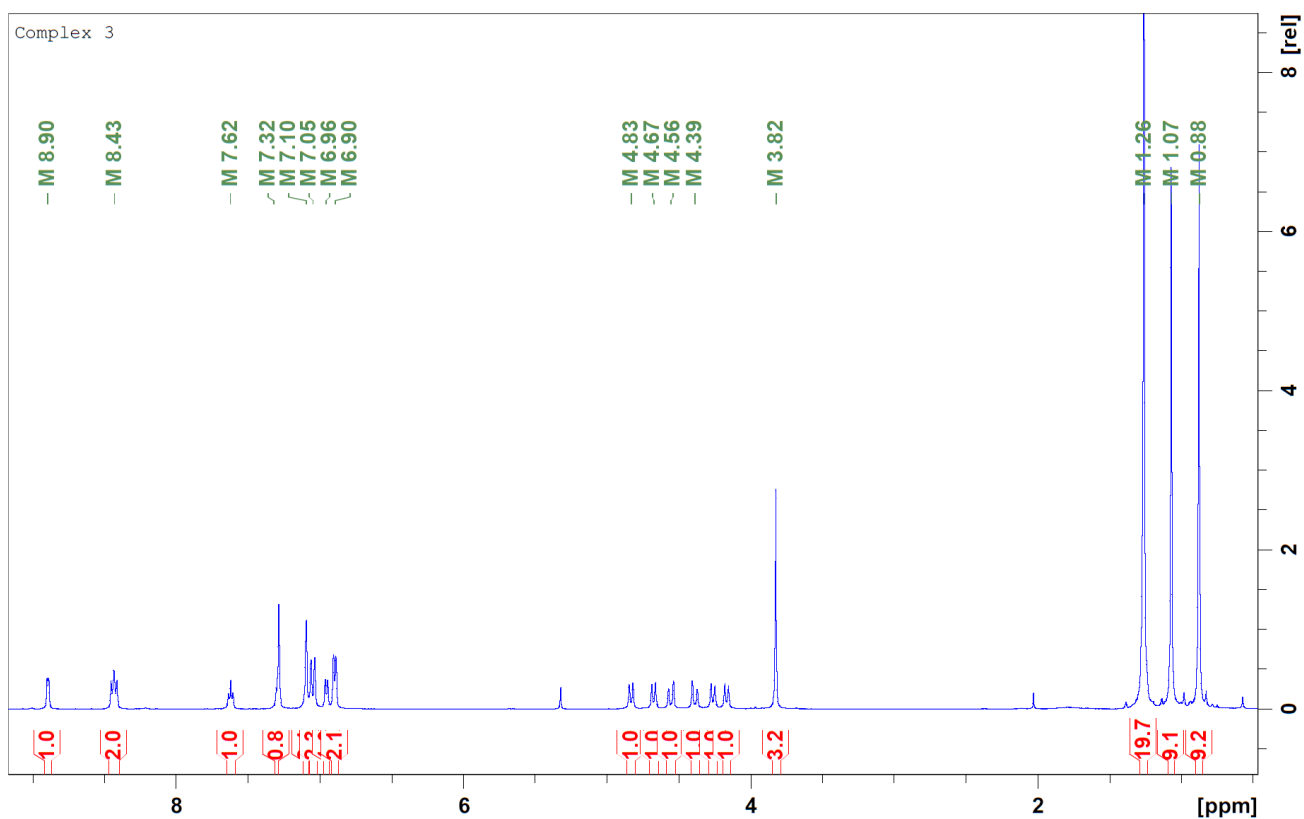

**Figure S4.** The  $^1\text{H}$  spectrum of **3**. Peaks at 2.1 and 5.3 ppm are due to the acetonitrile of crystallization and  $\text{CH}_2\text{Cl}_2$  residue used in the sample preparation, respectively.

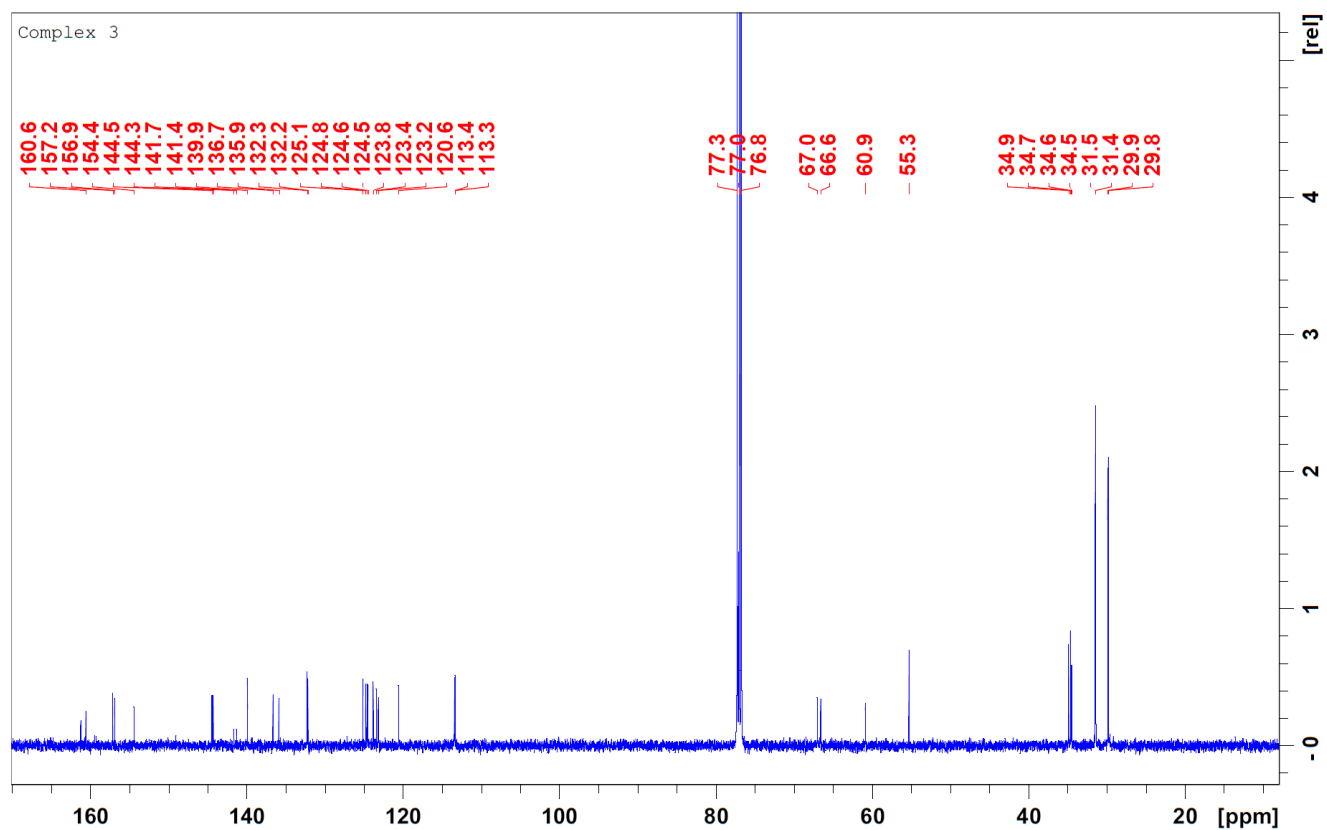

**Figure S5.** The  $^{13}\text{C}$  NMR spectrum of **3**.
