# Supplementary material for: Reactions of a Dioxidomolybdenum(VI) Complex with Thionation Reagents—Formation of Mo(IV) Species with Sulfur Donors
Source: Molecules. 2022 Oct 22;27(21):7154. doi: 10.3390/molecules27217154 (PMC9655758; doi:10.3390/molecules27217154)
Supplement: Supplementary file 1 [file molecules-27-07154-s001.zip]

Archive with 5 entries (5 files):
- 2.cif
- 2_checkcif.pdf
- 3.cif
- 3_checkcif.pdf
- molecules-1978680-Supporting information.pdf
