# Supplementary material for: Reactions of a Dioxidomolybdenum(VI) Complex with Thionation Reagents—Formation of Mo(IV) Species with Sulfur Donors
Source: Molecules. 2022 Oct 22;27(21):7154. doi: 10.3390/molecules27217154 (PMC9655758; doi:10.3390/molecules27217154)
Supplement: Supplementary file 1 [file molecules-27-07154-s001.zip › 2.cif]

data_2
_audit_creation_date               2022-06-03
_audit_creation_method
;
Olex2 1.5
(compiled 2022.04.07 svn.rca3783a0 for OlexSys, GUI svn.r6498)
;
_shelx_SHELXL_version_number       '2018/3'
_audit_contact_author_address      ?
_audit_contact_author_email        ?
_audit_contact_author_name         ''
_audit_contact_author_phone        ?
_publ_contact_author_id_orcid      ?
_publ_section_references
;
Dolomanov, O.V., Bourhis, L.J., Gildea, R.J, Howard, J.A.K. & Puschmann, H.
 (2009), J. Appl. Cryst. 42, 339-341.

Sheldrick, G.M. (2008). Acta Cryst. A64, 112-122.

Sheldrick, G.M. (2015). Acta Cryst. C71, 3-8.
;
_chemical_name_common              ?
_chemical_name_systematic          ?
_chemical_formula_moiety           'C36 H50 Mo N2 O2 S4'
_chemical_formula_sum              'C36 H50 Mo N2 O2 S4'
_chemical_formula_weight           766.96
_chemical_melting_point            ?
_chemical_oxdiff_formula           'C36 H50 Mo1 N2 O2 S4'
loop_
  _atom_type_symbol
  _atom_type_description
  _atom_type_scat_dispersion_real
  _atom_type_scat_dispersion_imag
  _atom_type_scat_source
 'C' 'C' 0.0181 0.0091 'International Tables Vol C Tables 4.2.6.8 and 6.1.1.4'
 'H' 'H' 0.0000 0.0000 'International Tables Vol C Tables 4.2.6.8 and 6.1.1.4'
 'Mo' 'Mo' -0.0483 2.7339
 'International Tables Vol C Tables 4.2.6.8 and 6.1.1.4'
 'N' 'N' 0.0311 0.0180 'International Tables Vol C Tables 4.2.6.8 and 6.1.1.4'
 'O' 'O' 0.0492 0.0322 'International Tables Vol C Tables 4.2.6.8 and 6.1.1.4'
 'S' 'S' 0.3331 0.5567 'International Tables Vol C Tables 4.2.6.8 and 6.1.1.4'

_shelx_space_group_comment
;
The symmetry employed for this shelxl refinement is uniquely defined
by the following loop, which should always be used as a source of
symmetry information in preference to the above space-group names.
They are only intended as comments.
;
_space_group_crystal_system        'triclinic'
_space_group_IT_number             2
_space_group_name_H-M_alt          'P -1'
_space_group_name_Hall             '-P 1'
loop_
  _space_group_symop_operation_xyz
 'x, y, z'
 '-x, -y, -z'

_cell_length_a                     10.0273(2)
_cell_length_b                     10.0625(3)
_cell_length_c                     19.4957(3)
_cell_angle_alpha                  101.1045(17)
_cell_angle_beta                   96.0498(14)
_cell_angle_gamma                  101.0893(19)
_cell_volume                       1873.41(7)
_cell_formula_units_Z              2
_cell_measurement_reflns_used      16175
_cell_measurement_temperature      125.00(10)
_cell_measurement_theta_max        76.9040
_cell_measurement_theta_min        2.3080
_shelx_estimated_absorpt_T_max     0.492
_shelx_estimated_absorpt_T_min     0.391
_exptl_absorpt_coefficient_mu      5.199
_exptl_absorpt_correction_T_max    1.000
_exptl_absorpt_correction_T_min    0.421
_exptl_absorpt_correction_type     gaussian
_exptl_absorpt_process_details
;
CrysAlisPro 1.171.41.116a (Rigaku Oxford Diffraction, 2021)
Numerical absorption correction based on gaussian integration over
a multifaceted crystal model
Empirical absorption correction using spherical harmonics,
implemented in SCALE3 ABSPACK scaling algorithm.
;
_exptl_absorpt_special_details     ?
_exptl_crystal_colour              'dark red'
_exptl_crystal_colour_modifier     dark
_exptl_crystal_colour_primary      red
_exptl_crystal_density_diffrn      1.360
_exptl_crystal_density_meas        ?
_exptl_crystal_density_method      ?
_exptl_crystal_description         block
_exptl_crystal_F_000               804
loop_
  _exptl_crystal_face_index_h
  _exptl_crystal_face_index_k
  _exptl_crystal_face_index_l
  _exptl_crystal_face_perp_dist
 5 -1 6 0.0848
 -6 0 2 0.1003
 -3 1 -10 0.0668
 6 0 -4 0.0975
 1 -2 12 0.0499
 0 5 5 0.0803
 -1 2 -12 0.0781
 1 -7 2 0.0891
 -5 5 -4 0.0506
 0 -6 7 0.0620

_exptl_crystal_size_max            0.222
_exptl_crystal_size_mid            0.185
_exptl_crystal_size_min            0.159
loop_
  _exptl_oxdiff_crystal_face_indexfrac_h
  _exptl_oxdiff_crystal_face_indexfrac_k
  _exptl_oxdiff_crystal_face_indexfrac_l
  _exptl_oxdiff_crystal_face_x
  _exptl_oxdiff_crystal_face_y
  _exptl_oxdiff_crystal_face_z
 5.2901 -1.0598 6.0875 -0.0577 0.7511 0.6577
 -6.4466 0.4712 2.4753 0.0798 -0.9966 -0.0183
 -3.0501 1.1839 -10.4193 0.0266 -0.3762 -0.9261
 6.3036 -0.3131 -4.2016 -0.0798 0.9892 -0.1231
 0.7015 -1.5983 12.3665 0.0831 0.0028 0.9965
 -0.3077 5.1057 5.4521 -0.8719 -0.0718 0.4844
 -0.7753 2.3505 -12.2253 -0.2026 -0.0124 -0.9792
 0.7939 -6.5144 2.3755 0.9866 0.0785 0.1433
 -5.0179 4.6473 -3.9391 -0.5484 -0.7140 -0.4353
 -0.1824 -5.8329 7.4795 0.8434 -0.1077 0.5263

_exptl_transmission_factor_max     ?
_exptl_transmission_factor_min     ?
_diffrn_reflns_av_R_equivalents    0.0562
_diffrn_reflns_av_unetI/netI       0.0476
_diffrn_reflns_Laue_measured_fraction_full  0.996
_diffrn_reflns_Laue_measured_fraction_max  0.991
_diffrn_reflns_limit_h_max         12
_diffrn_reflns_limit_h_min         -12
_diffrn_reflns_limit_k_max         12
_diffrn_reflns_limit_k_min         -12
_diffrn_reflns_limit_l_max         24
_diffrn_reflns_limit_l_min         -17
_diffrn_reflns_number              21711
_diffrn_reflns_point_group_measured_fraction_full  0.996
_diffrn_reflns_point_group_measured_fraction_max  0.991
_diffrn_reflns_theta_full          67.684
_diffrn_reflns_theta_max           72.117
_diffrn_reflns_theta_min           2.335
_diffrn_ambient_environment        N~2~
_diffrn_ambient_temperature        125.00(10)
_diffrn_detector                   'Hybrid Pixel Array Detector'
_diffrn_detector_area_resol_mean   10.0000
_diffrn_detector_type              HyPix
_diffrn_measured_fraction_theta_full  0.996
_diffrn_measured_fraction_theta_max  0.991
_diffrn_measurement_details
;
List of Runs (angles in degrees, time in seconds):

  # Type    Start    End  Width  t~exp~   \w     \q     \k     \f   Frames
--------------------------------------------------------------------------
  1  \w     97.00 172.00   0.50    0.24    --  107.75  45.00  30.00  150
  2  \w     46.00 121.00   0.50    0.80    --   47.64  38.00 120.00  150
  3  \w    100.00 135.00   0.50    0.24    --  107.75  30.00 150.00   70
  4  \w    145.00 173.00   0.50    0.24    --  107.75  30.00 150.00   56
  5  \w     95.00 165.00   0.50    0.24    --  107.75  13.00 118.00  140
  6  \w    150.00 175.00   0.50    0.24    --  107.75  77.00-180.00   50
  7  \w     85.00 133.00   0.50    0.24    --  107.75  77.00-180.00   96
  8  \w     99.00 124.00   0.50    0.24    --  107.75  30.00-180.00   50
  9  \w    130.00 171.00   0.50    0.24    --  107.75  30.00-180.00   82
 10  \w    140.00 172.00   0.50    0.24    --  107.75   0.00 -30.00   64
 11  \w     36.00 104.00   0.50    0.80    --   47.64  13.00 118.00  136
 12  \w     41.00  66.00   0.50    0.24    --  107.75   0.00 -30.00   50
 13  \w     71.00 115.00   0.50    0.24    --  107.75   0.00 -30.00   88
 14  \w     35.00  66.00   0.50    0.24    --  107.75 -61.00-150.00   62
 15  \w    -21.00  23.00   0.50    0.80    --   47.64 -19.00 150.00   88
 16  \w     41.00  68.00   0.50    0.24    --  107.75 -61.00 150.00   54
 17  \w     35.00  65.00   0.50    0.24    --  107.75 -61.00  60.00   60
 18  \w    -25.00  12.00   0.50    0.80    --   47.64 -13.00 -53.00   74
 19  \w     39.00  68.00   0.50    0.24    --  107.75 -61.00 -90.00   58
 20  \w     46.00 110.00   0.50    0.24    --  107.75-125.00 -60.00  128
 21  \w     51.00 104.00   0.50    0.24    --  107.75 -95.00-150.00  106
 22  \w     42.00 112.00   0.50    0.24    --  107.75-125.00 -30.00  140
 23  \w     38.00  94.00   0.50    0.24    --  107.75 -95.00   0.00  112
 24  \w     42.00  67.00   0.50    0.24    --  107.75 -95.00  90.00   50
 25  \w     46.00 104.00   0.50    0.24    --  107.75 -95.00 150.00  116
 26  \w     37.00 102.00   0.50    0.24    --  107.75 -95.00 120.00  130
 27  \w     44.00  74.00   0.50    0.24    --  107.75 -95.00  60.00   60
 28  \w     76.00 103.00   0.50    0.24    --  107.75 -95.00  60.00   54
 29  \w     70.00 103.00   0.50    0.24    --  107.75 -95.00  90.00   66
 30  \w     59.00 101.00   0.50    0.24    --  107.75 -95.00  30.00   84
 31  \w     35.00 105.00   0.50    0.24    --  107.75 -95.00 -30.00  140
 32  \w    -27.00  27.00   0.50    0.80    --  -47.64  13.00 118.00  108
 33  \w    -64.00 -32.00   0.50    0.24    --  -97.00 125.00 -30.00   64
 34  \w   -111.00 -85.00   0.50    0.24    --  -97.00 125.00 -30.00   52
 35  \w    -88.00 -29.00   0.50    0.80    --  -47.64 125.00 -90.00  118
 36  \w    -70.00 -36.00   0.50    0.24    --  -97.00 125.00-180.00   68
 37  \w   -112.00 -76.00   0.50    0.24    --  -97.00 125.00-180.00   72
 38  \w   -115.00 -33.00   0.50    0.80    --  -47.64 -13.00 -53.00  164
 39  \w   -170.00-134.00   0.50    0.24    --  -97.00 -13.00 -53.00   72
 40  \w   -129.00 -91.00   0.50    0.24    --  -97.00 -13.00 -53.00   76
;
_diffrn_measurement_device         'four-circle diffractometer'
_diffrn_measurement_device_type    'ROD, Synergy Custom system, HyPix'
_diffrn_measurement_method         '\w scans'
_diffrn_orient_matrix_type        
 'CrysAlisPro convention (1999,Acta A55,543-557)'
_diffrn_orient_matrix_UB_11        -0.0287383000
_diffrn_orient_matrix_UB_12        -0.1594147000
_diffrn_orient_matrix_UB_13        -0.0122546000
_diffrn_orient_matrix_UB_21        0.1518153000
_diffrn_orient_matrix_UB_22        0.0035589000
_diffrn_orient_matrix_UB_23        -0.0079275000
_diffrn_orient_matrix_UB_31        0.0344286000
_diffrn_orient_matrix_UB_32        0.0114105000
_diffrn_orient_matrix_UB_33        0.0801053000
_diffrn_radiation_monochromator    mirror
_diffrn_radiation_probe            x-ray
_diffrn_radiation_type             'Cu K\a'
_diffrn_radiation_wavelength       1.54184
_diffrn_source                     'Rotating-anode X-ray tube'
_diffrn_source_type                'Rigaku (Cu) X-ray Source'
_reflns_Friedel_coverage           0.000
_reflns_Friedel_fraction_full      .
_reflns_Friedel_fraction_max       .
_reflns_number_gt                  6890
_reflns_number_total               7327
_reflns_special_details
;
 Reflections were merged by SHELXL according to the crystal
 class for the calculation of statistics and refinement.
 
 _reflns_Friedel_fraction is defined as the number of unique
 Friedel pairs measured divided by the number that would be
 possible theoretically, ignoring centric projections and
 systematic absences.
;
_reflns_threshold_expression       'I > 2\s(I)'
_computing_cell_refinement         'CrysAlisPro 1.171.41.116a (Rigaku OD, 2021)'
_computing_data_collection         'CrysAlisPro 1.171.41.116a (Rigaku OD, 2021)'
_computing_data_reduction          'CrysAlisPro 1.171.41.116a (Rigaku OD, 2021)'
_computing_molecular_graphics      'Olex2 1.5 (Dolomanov et al., 2009)'
_computing_publication_material    'Olex2 1.5 (Dolomanov et al., 2009)'
_computing_structure_refinement    'SHELXL 2018/3 (Sheldrick, 2015)'
_computing_structure_solution      'SHELXS  (Sheldrick, 2008)'
_refine_diff_density_max           0.886
_refine_diff_density_min           -0.768
_refine_diff_density_rms           0.084
_refine_ls_extinction_coef         .
_refine_ls_extinction_method       none
_refine_ls_goodness_of_fit_ref     1.036
_refine_ls_hydrogen_treatment      constr
_refine_ls_matrix_type             full
_refine_ls_number_parameters       437
_refine_ls_number_reflns           7327
_refine_ls_number_restraints       0
_refine_ls_R_factor_all            0.0381
_refine_ls_R_factor_gt             0.0363
_refine_ls_restrained_S_all        1.036
_refine_ls_shift/su_max            0.001
_refine_ls_shift/su_mean           0.000
_refine_ls_structure_factor_coef   Fsqd
_refine_ls_weighting_details      
 'w=1/[\s^2^(Fo^2^)+(0.0565P)^2^+0.8119P] where P=(Fo^2^+2Fc^2^)/3'
_refine_ls_weighting_scheme        calc
_refine_ls_wR_factor_gt            0.0966
_refine_ls_wR_factor_ref           0.0979
_refine_special_details            ?
_olex2_refinement_description
;
1. Fixed Uiso
 At 1.2 times of:
  All C(H) groups, All C(H,H) groups
 At 1.5 times of:
  All C(H,H,H) groups
2. Others
 Sof(S2B)=Sof(S3B)=1-FVAR(1)
 Sof(S2A)=Sof(S3A)=FVAR(1)
3.a Secondary CH2 refined with riding coordinates:
 C7(H7A,H7B), C9(H9A,H9B), C32(H32A,H32B)
3.b Aromatic/amide H refined with riding coordinates:
 C3(H3), C5(H5), C11(H11), C13(H13), C34(H34), C35(H35), C36(H36), C37(H37)
3.c Idealised Me refined as rotating group:
 C17(H17A,H17B,H17C), C18(H18A,H18B,H18C), C19(H19A,H19B,H19C), C21(H21A,H21B,
 H21C), C22(H22A,H22B,H22C), C23(H23A,H23B,H23C), C25(H25A,H25B,H25C), C26(H26A,
 H26B,H26C), C27(H27A,H27B,H27C), C29(H29A,H29B,H29C), C30(H30A,H30B,H30C),
 C31(H31A,H31B,H31C)
;
_atom_sites_solution_hydrogens     geom
_atom_sites_solution_primary       direct
_atom_sites_solution_secondary     ?
loop_
  _atom_site_label
  _atom_site_type_symbol
  _atom_site_fract_x
  _atom_site_fract_y
  _atom_site_fract_z
  _atom_site_U_iso_or_equiv
  _atom_site_adp_type
  _atom_site_occupancy
  _atom_site_site_symmetry_order
  _atom_site_calc_flag
  _atom_site_refinement_flags_posn
  _atom_site_refinement_flags_adp
  _atom_site_refinement_flags_occupancy
  _atom_site_disorder_assembly
  _atom_site_disorder_group
 Mo1 Mo 0.36565(2) 0.18565(2) 0.24699(2) 0.01818(8) Uani 1 1 d . . . . .
 S1 S 0.55809(6) 0.21766(6) 0.19916(3) 0.02418(14) Uani 1 1 d . . . . .
 S4 S 0.41160(7) 0.01561(6) 0.29693(3) 0.02905(15) Uani 1 1 d . . . . .
 O1 O 0.42059(16) 0.33293(16) 0.33117(8) 0.0211(3) Uani 1 1 d . . . . .
 O2 O 0.24963(16) 0.06849(17) 0.16469(8) 0.0230(3) Uani 1 1 d . . . . .
 N8 N 0.14698(19) 0.1798(2) 0.27948(10) 0.0192(4) Uani 1 1 d . . . . .
 N38 N 0.28702(19) 0.3613(2) 0.20603(10) 0.0208(4) Uani 1 1 d . . . . .
 C1 C 0.3656(2) 0.4351(2) 0.36462(11) 0.0195(4) Uani 1 1 d . . . . .
 C2 C 0.4443(2) 0.5704(2) 0.39119(12) 0.0211(5) Uani 1 1 d . . . . .
 C3 C 0.3731(2) 0.6712(2) 0.41712(12) 0.0234(5) Uani 1 1 d . . . . .
 H3 H 0.423376 0.764178 0.433860 0.028 Uiso 1 1 calc R U . . .
 C4 C 0.2316(2) 0.6429(2) 0.41982(12) 0.0225(5) Uani 1 1 d . . . . .
 C5 C 0.1609(2) 0.5052(2) 0.39894(11) 0.0218(5) Uani 1 1 d . . . . .
 H5 H 0.065990 0.481873 0.402902 0.026 Uiso 1 1 calc R U . . .
 C6 C 0.2265(2) 0.4013(2) 0.37242(11) 0.0206(5) Uani 1 1 d . . . . .
 C7 C 0.1550(2) 0.2507(2) 0.35519(12) 0.0220(5) Uani 1 1 d . . . . .
 H7A H 0.203990 0.201416 0.385456 0.026 Uiso 1 1 calc R U . . .
 H7B H 0.060571 0.243039 0.366996 0.026 Uiso 1 1 calc R U . . .
 C9 C 0.0715(2) 0.0336(2) 0.27181(12) 0.0224(5) Uani 1 1 d . . . . .
 H9A H -0.018385 0.034933 0.288361 0.027 Uiso 1 1 calc R U . . .
 H9B H 0.124004 -0.010499 0.303364 0.027 Uiso 1 1 calc R U . . .
 C10 C 0.0461(2) -0.0557(2) 0.19794(12) 0.0209(5) Uani 1 1 d . . . . .
 C11 C -0.0719(2) -0.1612(2) 0.17806(12) 0.0218(5) Uani 1 1 d . . . . .
 H11 H -0.134029 -0.173688 0.211035 0.026 Uiso 1 1 calc R U . . .
 C12 C -0.1014(2) -0.2487(2) 0.11148(12) 0.0212(5) Uani 1 1 d . . . . .
 C13 C -0.0078(2) -0.2281(2) 0.06463(12) 0.0212(5) Uani 1 1 d . . . . .
 H13 H -0.025932 -0.288936 0.019350 0.025 Uiso 1 1 calc R U . . .
 C14 C 0.1116(2) -0.1225(2) 0.08052(12) 0.0203(5) Uani 1 1 d . . . . .
 C15 C 0.1371(2) -0.0364(2) 0.14854(12) 0.0202(5) Uani 1 1 d . . . . .
 C16 C 0.6014(2) 0.6044(2) 0.39389(12) 0.0231(5) Uani 1 1 d . . . . .
 C17 C 0.6646(3) 0.7520(3) 0.43659(14) 0.0327(6) Uani 1 1 d . . . . .
 H17A H 0.637413 0.762751 0.483835 0.049 Uiso 1 1 calc R U . . .
 H17B H 0.631764 0.819093 0.412451 0.049 Uiso 1 1 calc R U . . .
 H17C H 0.764971 0.768576 0.440764 0.049 Uiso 1 1 calc R U . . .
 C18 C 0.6648(3) 0.5035(3) 0.42995(14) 0.0312(6) Uani 1 1 d . . . . .
 H18A H 0.630055 0.408565 0.402123 0.047 Uiso 1 1 calc R U . . .
 H18B H 0.639626 0.509662 0.477512 0.047 Uiso 1 1 calc R U . . .
 H18C H 0.765018 0.527814 0.433223 0.047 Uiso 1 1 calc R U . . .
 C19 C 0.6393(2) 0.5939(3) 0.31887(13) 0.0283(5) Uani 1 1 d . . . . .
 H19A H 0.739202 0.621744 0.321679 0.042 Uiso 1 1 calc R U . . .
 H19B H 0.595277 0.655375 0.295249 0.042 Uiso 1 1 calc R U . . .
 H19C H 0.607361 0.498039 0.291898 0.042 Uiso 1 1 calc R U . . .
 C20 C 0.1550(3) 0.7579(3) 0.44370(14) 0.0287(5) Uani 1 1 d . . . . .
 C21 C 0.0812(3) 0.7289(3) 0.50575(15) 0.0344(6) Uani 1 1 d . . . . .
 H21A H 0.030436 0.801371 0.519709 0.052 Uiso 1 1 calc R U . . .
 H21B H 0.148841 0.728284 0.545756 0.052 Uiso 1 1 calc R U . . .
 H21C H 0.016933 0.638399 0.491559 0.052 Uiso 1 1 calc R U . . .
 C22 C 0.2497(3) 0.9012(3) 0.46587(18) 0.0415(7) Uani 1 1 d . . . . .
 H22A H 0.195285 0.970976 0.478525 0.062 Uiso 1 1 calc R U . . .
 H22B H 0.298029 0.921091 0.426603 0.062 Uiso 1 1 calc R U . . .
 H22C H 0.316830 0.903941 0.506750 0.062 Uiso 1 1 calc R U . . .
 C23 C 0.0488(3) 0.7591(3) 0.38062(15) 0.0364(6) Uani 1 1 d . . . . .
 H23A H -0.018821 0.670657 0.368161 0.055 Uiso 1 1 calc R U . . .
 H23B H 0.095724 0.772171 0.340019 0.055 Uiso 1 1 calc R U . . .
 H23C H 0.001923 0.835226 0.393631 0.055 Uiso 1 1 calc R U . . .
 C24 C -0.2345(2) -0.3624(2) 0.09072(13) 0.0232(5) Uani 1 1 d . . . . .
 C25 C -0.2554(3) -0.4371(3) 0.01298(13) 0.0313(6) Uani 1 1 d . . . . .
 H25A H -0.258109 -0.369510 -0.016963 0.047 Uiso 1 1 calc R U . . .
 H25B H -0.342153 -0.506503 0.001959 0.047 Uiso 1 1 calc R U . . .
 H25C H -0.179187 -0.483061 0.004126 0.047 Uiso 1 1 calc R U . . .
 C26 C -0.2294(3) -0.4697(3) 0.13681(13) 0.0288(5) Uani 1 1 d . . . . .
 H26A H -0.149621 -0.510963 0.129667 0.043 Uiso 1 1 calc R U . . .
 H26B H -0.313583 -0.542668 0.123493 0.043 Uiso 1 1 calc R U . . .
 H26C H -0.221755 -0.424050 0.186660 0.043 Uiso 1 1 calc R U . . .
 C27 C -0.3599(3) -0.2995(3) 0.10345(15) 0.0329(6) Uani 1 1 d . . . . .
 H27A H -0.350823 -0.254281 0.153463 0.049 Uiso 1 1 calc R U . . .
 H27B H -0.443524 -0.373094 0.090666 0.049 Uiso 1 1 calc R U . . .
 H27C H -0.365303 -0.230844 0.074360 0.049 Uiso 1 1 calc R U . . .
 C28 C 0.2114(2) -0.1031(2) 0.02677(12) 0.0228(5) Uani 1 1 d . . . . .
 C29 C 0.2391(3) 0.0457(3) 0.01548(14) 0.0327(6) Uani 1 1 d . . . . .
 H29A H 0.151617 0.070964 0.002703 0.049 Uiso 1 1 calc R U . . .
 H29B H 0.294798 0.051927 -0.022644 0.049 Uiso 1 1 calc R U . . .
 H29C H 0.288601 0.109330 0.059165 0.049 Uiso 1 1 calc R U . . .
 C30 C 0.3479(3) -0.1385(3) 0.05319(14) 0.0302(6) Uani 1 1 d . . . . .
 H30A H 0.387121 -0.078105 0.099463 0.045 Uiso 1 1 calc R U . . .
 H30B H 0.412374 -0.124401 0.019486 0.045 Uiso 1 1 calc R U . . .
 H30C H 0.330933 -0.235647 0.057411 0.045 Uiso 1 1 calc R U . . .
 C31 C 0.1535(3) -0.1992(3) -0.04576(14) 0.0354(6) Uani 1 1 d . . . . .
 H31A H 0.136497 -0.295957 -0.041023 0.053 Uiso 1 1 calc R U . . .
 H31B H 0.219972 -0.185262 -0.078553 0.053 Uiso 1 1 calc R U . . .
 H31C H 0.067207 -0.177590 -0.064032 0.053 Uiso 1 1 calc R U . . .
 C32 C 0.0695(2) 0.2497(3) 0.23362(12) 0.0223(5) Uani 1 1 d . . . . .
 H32A H -0.006046 0.278751 0.257310 0.027 Uiso 1 1 calc R U . . .
 H32B H 0.028028 0.182957 0.188701 0.027 Uiso 1 1 calc R U . . .
 C33 C 0.1587(2) 0.3739(2) 0.21774(12) 0.0209(5) Uani 1 1 d . . . . .
 C34 C 0.1108(3) 0.4922(3) 0.21242(13) 0.0260(5) Uani 1 1 d . . . . .
 H34 H 0.020728 0.498262 0.221610 0.031 Uiso 1 1 calc R U . . .
 C35 C 0.1947(3) 0.6016(3) 0.19364(13) 0.0293(5) Uani 1 1 d . . . . .
 H35 H 0.163354 0.683506 0.189744 0.035 Uiso 1 1 calc R U . . .
 C36 C 0.3256(3) 0.5888(3) 0.18065(13) 0.0278(5) Uani 1 1 d . . . . .
 H36 H 0.385655 0.661661 0.167444 0.033 Uiso 1 1 calc R U . . .
 C37 C 0.3670(2) 0.4679(3) 0.18728(12) 0.0229(5) Uani 1 1 d . . . . .
 H37 H 0.456609 0.459755 0.178124 0.028 Uiso 1 1 calc R U . . .
 S2A S 0.6880(9) 0.0757(7) 0.2124(4) 0.0337(10) Uani 0.65(5) 1 d . . P A 1
 S3A S 0.6163(14) -0.0272(12) 0.2835(5) 0.0543(14) Uani 0.65(5) 1 d . . P A 1
 S2B S 0.7014(16) 0.091(2) 0.2314(19) 0.051(3) Uani 0.35(5) 1 d . . P A 2
 S3B S 0.5970(17) -0.0447(12) 0.2779(8) 0.0408(19) Uani 0.35(5) 1 d . . P A 2

loop_
  _atom_site_aniso_label
  _atom_site_aniso_U_11
  _atom_site_aniso_U_22
  _atom_site_aniso_U_33
  _atom_site_aniso_U_23
  _atom_site_aniso_U_13
  _atom_site_aniso_U_12
 Mo1 0.01575(11) 0.01832(12) 0.01987(11) 0.00313(8) 0.00202(7) 0.00363(8)
 S1 0.0182(3) 0.0234(3) 0.0316(3) 0.0055(2) 0.0064(2) 0.0050(2)
 S4 0.0330(3) 0.0251(3) 0.0334(3) 0.0108(3) 0.0081(3) 0.0106(3)
 O1 0.0191(8) 0.0205(8) 0.0211(8) 0.0002(6) -0.0009(6) 0.0046(6)
 O2 0.0184(8) 0.0237(8) 0.0225(8) 0.0000(6) 0.0047(6) -0.0016(7)
 N8 0.0186(9) 0.0192(10) 0.0178(9) 0.0014(7) 0.0023(7) 0.0021(8)
 N38 0.0169(9) 0.0262(10) 0.0180(9) 0.0032(8) -0.0003(7) 0.0051(8)
 C1 0.0204(11) 0.0215(11) 0.0158(10) 0.0024(9) 0.0003(8) 0.0059(9)
 C2 0.0191(11) 0.0239(12) 0.0191(11) 0.0039(9) 0.0008(9) 0.0038(9)
 C3 0.0246(12) 0.0216(12) 0.0219(11) 0.0022(9) 0.0028(9) 0.0027(10)
 C4 0.0248(12) 0.0233(12) 0.0196(11) 0.0032(9) 0.0039(9) 0.0070(10)
 C5 0.0192(11) 0.0272(12) 0.0192(11) 0.0050(9) 0.0037(9) 0.0049(10)
 C6 0.0216(11) 0.0215(11) 0.0168(10) 0.0034(9) 0.0000(8) 0.0027(9)
 C7 0.0214(11) 0.0251(12) 0.0190(11) 0.0032(9) 0.0047(9) 0.0046(10)
 C9 0.0198(11) 0.0222(12) 0.0244(11) 0.0048(9) 0.0065(9) 0.0011(9)
 C10 0.0189(11) 0.0213(11) 0.0226(11) 0.0038(9) 0.0034(9) 0.0058(9)
 C11 0.0200(11) 0.0221(12) 0.0247(11) 0.0065(9) 0.0054(9) 0.0057(9)
 C12 0.0168(11) 0.0209(11) 0.0255(11) 0.0051(9) 0.0004(9) 0.0044(9)
 C13 0.0218(11) 0.0210(11) 0.0198(11) 0.0015(9) -0.0001(9) 0.0065(9)
 C14 0.0179(11) 0.0216(11) 0.0236(11) 0.0067(9) 0.0011(9) 0.0091(9)
 C15 0.0175(11) 0.0181(11) 0.0246(11) 0.0034(9) 0.0018(9) 0.0048(9)
 C16 0.0177(11) 0.0235(12) 0.0243(11) 0.0007(9) -0.0006(9) 0.0021(9)
 C17 0.0211(12) 0.0312(14) 0.0366(14) -0.0046(11) 0.0025(10) -0.0035(11)
 C18 0.0222(12) 0.0398(15) 0.0286(13) 0.0070(11) -0.0040(10) 0.0043(11)
 C19 0.0185(11) 0.0342(14) 0.0296(13) 0.0054(11) 0.0038(10) 0.0012(10)
 C20 0.0300(13) 0.0247(13) 0.0333(13) 0.0049(10) 0.0106(11) 0.0086(11)
 C21 0.0370(15) 0.0342(14) 0.0360(14) 0.0061(12) 0.0162(12) 0.0131(12)
 C22 0.0377(16) 0.0245(14) 0.0610(19) -0.0008(13) 0.0203(14) 0.0068(12)
 C23 0.0359(15) 0.0366(15) 0.0442(16) 0.0142(13) 0.0095(12) 0.0185(13)
 C24 0.0172(11) 0.0215(12) 0.0281(12) 0.0036(10) 0.0005(9) 0.0012(9)
 C25 0.0270(13) 0.0309(14) 0.0290(13) 0.0033(11) -0.0013(10) -0.0044(11)
 C26 0.0280(13) 0.0238(13) 0.0313(13) 0.0042(10) 0.0008(10) 0.0018(10)
 C27 0.0188(12) 0.0303(14) 0.0465(16) 0.0047(12) 0.0022(11) 0.0029(10)
 C28 0.0217(11) 0.0245(12) 0.0229(11) 0.0035(9) 0.0039(9) 0.0077(10)
 C29 0.0388(15) 0.0343(14) 0.0297(13) 0.0130(11) 0.0105(11) 0.0100(12)
 C30 0.0249(12) 0.0353(14) 0.0336(13) 0.0073(11) 0.0078(10) 0.0129(11)
 C31 0.0347(14) 0.0437(16) 0.0250(13) 0.0023(12) 0.0085(11) 0.0046(13)
 C32 0.0170(11) 0.0272(13) 0.0227(11) 0.0038(9) 0.0026(9) 0.0062(10)
 C33 0.0181(11) 0.0255(12) 0.0186(10) 0.0049(9) 0.0009(9) 0.0044(9)
 C34 0.0217(12) 0.0315(13) 0.0266(12) 0.0075(10) 0.0027(9) 0.0099(10)
 C35 0.0314(13) 0.0281(13) 0.0325(13) 0.0123(11) 0.0021(11) 0.0118(11)
 C36 0.0266(13) 0.0293(13) 0.0295(13) 0.0129(11) 0.0047(10) 0.0046(11)
 C37 0.0194(11) 0.0275(13) 0.0211(11) 0.0053(9) 0.0019(9) 0.0036(10)
 S2A 0.0238(16) 0.0319(13) 0.052(2) 0.0137(12) 0.0119(13) 0.0142(10)
 S3A 0.052(3) 0.073(3) 0.067(2) 0.044(3) 0.0251(18) 0.046(3)
 S2B 0.023(2) 0.050(4) 0.090(9) 0.027(5) 0.009(4) 0.016(2)
 S3B 0.043(3) 0.028(4) 0.060(3) 0.012(3) 0.017(2) 0.020(3)

_geom_special_details
;
 All esds (except the esd in the dihedral angle between two l.s. planes)
 are estimated using the full covariance matrix.  The cell esds are taken
 into account individually in the estimation of esds in distances, angles
 and torsion angles; correlations between esds in cell parameters are only
 used when they are defined by crystal symmetry.  An approximate (isotropic)
 treatment of cell esds is used for estimating esds involving l.s. planes.
;
loop_
  _geom_bond_atom_site_label_1
  _geom_bond_atom_site_label_2
  _geom_bond_distance
  _geom_bond_site_symmetry_2
  _geom_bond_publ_flag
 Mo1 S1 2.2254(6) . ?
 Mo1 S4 2.2223(6) . ?
 Mo1 O1 1.9370(15) . ?
 Mo1 O2 1.9152(15) . ?
 Mo1 N8 2.3388(19) . ?
 Mo1 N38 2.309(2) . ?
 S1 S2A 2.143(7) . ?
 S1 S2B 2.215(15) . ?
 S4 S3A 2.208(10) . ?
 S4 S3B 2.111(16) . ?
 O1 C1 1.350(3) . ?
 O2 C15 1.351(3) . ?
 N8 C7 1.497(3) . ?
 N8 C9 1.490(3) . ?
 N8 C32 1.485(3) . ?
 N38 C33 1.356(3) . ?
 N38 C37 1.345(3) . ?
 C1 C2 1.404(3) . ?
 C1 C6 1.403(3) . ?
 C2 C3 1.398(3) . ?
 C2 C16 1.539(3) . ?
 C3 H3 0.9500 . ?
 C3 C4 1.401(3) . ?
 C4 C5 1.390(3) . ?
 C4 C20 1.535(3) . ?
 C5 H5 0.9500 . ?
 C5 C6 1.386(3) . ?
 C6 C7 1.503(3) . ?
 C7 H7A 0.9900 . ?
 C7 H7B 0.9900 . ?
 C9 H9A 0.9900 . ?
 C9 H9B 0.9900 . ?
 C9 C10 1.511(3) . ?
 C10 C11 1.392(3) . ?
 C10 C15 1.409(3) . ?
 C11 H11 0.9500 . ?
 C11 C12 1.388(3) . ?
 C12 C13 1.391(3) . ?
 C12 C24 1.541(3) . ?
 C13 H13 0.9500 . ?
 C13 C14 1.402(3) . ?
 C14 C15 1.405(3) . ?
 C14 C28 1.536(3) . ?
 C16 C17 1.533(3) . ?
 C16 C18 1.535(4) . ?
 C16 C19 1.538(3) . ?
 C17 H17A 0.9800 . ?
 C17 H17B 0.9800 . ?
 C17 H17C 0.9800 . ?
 C18 H18A 0.9800 . ?
 C18 H18B 0.9800 . ?
 C18 H18C 0.9800 . ?
 C19 H19A 0.9800 . ?
 C19 H19B 0.9800 . ?
 C19 H19C 0.9800 . ?
 C20 C21 1.529(4) . ?
 C20 C22 1.521(4) . ?
 C20 C23 1.544(4) . ?
 C21 H21A 0.9800 . ?
 C21 H21B 0.9800 . ?
 C21 H21C 0.9800 . ?
 C22 H22A 0.9800 . ?
 C22 H22B 0.9800 . ?
 C22 H22C 0.9800 . ?
 C23 H23A 0.9800 . ?
 C23 H23B 0.9800 . ?
 C23 H23C 0.9800 . ?
 C24 C25 1.530(3) . ?
 C24 C26 1.537(3) . ?
 C24 C27 1.534(3) . ?
 C25 H25A 0.9800 . ?
 C25 H25B 0.9800 . ?
 C25 H25C 0.9800 . ?
 C26 H26A 0.9800 . ?
 C26 H26B 0.9800 . ?
 C26 H26C 0.9800 . ?
 C27 H27A 0.9800 . ?
 C27 H27B 0.9800 . ?
 C27 H27C 0.9800 . ?
 C28 C29 1.532(4) . ?
 C28 C30 1.541(3) . ?
 C28 C31 1.535(3) . ?
 C29 H29A 0.9800 . ?
 C29 H29B 0.9800 . ?
 C29 H29C 0.9800 . ?
 C30 H30A 0.9800 . ?
 C30 H30B 0.9800 . ?
 C30 H30C 0.9800 . ?
 C31 H31A 0.9800 . ?
 C31 H31B 0.9800 . ?
 C31 H31C 0.9800 . ?
 C32 H32A 0.9900 . ?
 C32 H32B 0.9900 . ?
 C32 C33 1.495(3) . ?
 C33 C34 1.384(3) . ?
 C34 H34 0.9500 . ?
 C34 C35 1.385(4) . ?
 C35 H35 0.9500 . ?
 C35 C36 1.388(4) . ?
 C36 H36 0.9500 . ?
 C36 C37 1.382(4) . ?
 C37 H37 0.9500 . ?
 S2A S3A 1.998(10) . ?
 S2B S3B 1.98(2) . ?

loop_
  _geom_angle_atom_site_label_1
  _geom_angle_atom_site_label_2
  _geom_angle_atom_site_label_3
  _geom_angle
  _geom_angle_site_symmetry_1
  _geom_angle_site_symmetry_3
  _geom_angle_publ_flag
 S1 Mo1 N8 167.29(5) . . ?
 S1 Mo1 N38 94.05(5) . . ?
 S4 Mo1 S1 95.62(2) . . ?
 S4 Mo1 N8 96.56(5) . . ?
 S4 Mo1 N38 170.22(5) . . ?
 O1 Mo1 S1 99.20(5) . . ?
 O1 Mo1 S4 96.77(5) . . ?
 O1 Mo1 N8 82.96(6) . . ?
 O1 Mo1 N38 80.16(7) . . ?
 O2 Mo1 S1 97.00(5) . . ?
 O2 Mo1 S4 96.34(5) . . ?
 O2 Mo1 O1 158.01(7) . . ?
 O2 Mo1 N8 78.06(6) . . ?
 O2 Mo1 N38 83.96(7) . . ?
 N38 Mo1 N8 73.89(7) . . ?
 S2A S1 Mo1 115.67(19) . . ?
 S2B S1 Mo1 112.7(6) . . ?
 S3A S4 Mo1 113.3(2) . . ?
 S3B S4 Mo1 115.5(4) . . ?
 C1 O1 Mo1 136.14(14) . . ?
 C15 O2 Mo1 138.67(14) . . ?
 C7 N8 Mo1 111.51(13) . . ?
 C9 N8 Mo1 110.45(14) . . ?
 C9 N8 C7 106.84(17) . . ?
 C32 N8 Mo1 109.02(13) . . ?
 C32 N8 C7 109.26(18) . . ?
 C32 N8 C9 109.72(17) . . ?
 C33 N38 Mo1 115.87(15) . . ?
 C37 N38 Mo1 124.80(15) . . ?
 C37 N38 C33 117.5(2) . . ?
 O1 C1 C2 121.6(2) . . ?
 O1 C1 C6 117.5(2) . . ?
 C6 C1 C2 120.9(2) . . ?
 C1 C2 C16 121.6(2) . . ?
 C3 C2 C1 116.5(2) . . ?
 C3 C2 C16 121.9(2) . . ?
 C2 C3 H3 118.1 . . ?
 C2 C3 C4 123.7(2) . . ?
 C4 C3 H3 118.1 . . ?
 C3 C4 C20 122.2(2) . . ?
 C5 C4 C3 117.4(2) . . ?
 C5 C4 C20 120.4(2) . . ?
 C4 C5 H5 119.5 . . ?
 C6 C5 C4 121.1(2) . . ?
 C6 C5 H5 119.5 . . ?
 C1 C6 C7 118.2(2) . . ?
 C5 C6 C1 119.8(2) . . ?
 C5 C6 C7 121.8(2) . . ?
 N8 C7 C6 114.17(18) . . ?
 N8 C7 H7A 108.7 . . ?
 N8 C7 H7B 108.7 . . ?
 C6 C7 H7A 108.7 . . ?
 C6 C7 H7B 108.7 . . ?
 H7A C7 H7B 107.6 . . ?
 N8 C9 H9A 108.4 . . ?
 N8 C9 H9B 108.4 . . ?
 N8 C9 C10 115.64(19) . . ?
 H9A C9 H9B 107.4 . . ?
 C10 C9 H9A 108.4 . . ?
 C10 C9 H9B 108.4 . . ?
 C11 C10 C9 118.5(2) . . ?
 C11 C10 C15 118.9(2) . . ?
 C15 C10 C9 122.6(2) . . ?
 C10 C11 H11 119.0 . . ?
 C12 C11 C10 121.9(2) . . ?
 C12 C11 H11 119.0 . . ?
 C11 C12 C13 117.5(2) . . ?
 C11 C12 C24 120.5(2) . . ?
 C13 C12 C24 121.9(2) . . ?
 C12 C13 H13 118.2 . . ?
 C12 C13 C14 123.7(2) . . ?
 C14 C13 H13 118.2 . . ?
 C13 C14 C15 116.7(2) . . ?
 C13 C14 C28 121.7(2) . . ?
 C15 C14 C28 121.5(2) . . ?
 O2 C15 C10 120.7(2) . . ?
 O2 C15 C14 118.0(2) . . ?
 C14 C15 C10 121.2(2) . . ?
 C17 C16 C2 111.0(2) . . ?
 C17 C16 C18 107.8(2) . . ?
 C17 C16 C19 108.0(2) . . ?
 C18 C16 C2 109.8(2) . . ?
 C18 C16 C19 109.7(2) . . ?
 C19 C16 C2 110.50(19) . . ?
 C16 C17 H17A 109.5 . . ?
 C16 C17 H17B 109.5 . . ?
 C16 C17 H17C 109.5 . . ?
 H17A C17 H17B 109.5 . . ?
 H17A C17 H17C 109.5 . . ?
 H17B C17 H17C 109.5 . . ?
 C16 C18 H18A 109.5 . . ?
 C16 C18 H18B 109.5 . . ?
 C16 C18 H18C 109.5 . . ?
 H18A C18 H18B 109.5 . . ?
 H18A C18 H18C 109.5 . . ?
 H18B C18 H18C 109.5 . . ?
 C16 C19 H19A 109.5 . . ?
 C16 C19 H19B 109.5 . . ?
 C16 C19 H19C 109.5 . . ?
 H19A C19 H19B 109.5 . . ?
 H19A C19 H19C 109.5 . . ?
 H19B C19 H19C 109.5 . . ?
 C4 C20 C23 107.8(2) . . ?
 C21 C20 C4 110.1(2) . . ?
 C21 C20 C23 109.6(2) . . ?
 C22 C20 C4 112.8(2) . . ?
 C22 C20 C21 108.6(2) . . ?
 C22 C20 C23 107.9(2) . . ?
 C20 C21 H21A 109.5 . . ?
 C20 C21 H21B 109.5 . . ?
 C20 C21 H21C 109.5 . . ?
 H21A C21 H21B 109.5 . . ?
 H21A C21 H21C 109.5 . . ?
 H21B C21 H21C 109.5 . . ?
 C20 C22 H22A 109.5 . . ?
 C20 C22 H22B 109.5 . . ?
 C20 C22 H22C 109.5 . . ?
 H22A C22 H22B 109.5 . . ?
 H22A C22 H22C 109.5 . . ?
 H22B C22 H22C 109.5 . . ?
 C20 C23 H23A 109.5 . . ?
 C20 C23 H23B 109.5 . . ?
 C20 C23 H23C 109.5 . . ?
 H23A C23 H23B 109.5 . . ?
 H23A C23 H23C 109.5 . . ?
 H23B C23 H23C 109.5 . . ?
 C25 C24 C12 112.4(2) . . ?
 C25 C24 C26 108.7(2) . . ?
 C25 C24 C27 107.9(2) . . ?
 C26 C24 C12 109.21(19) . . ?
 C27 C24 C12 110.4(2) . . ?
 C27 C24 C26 108.1(2) . . ?
 C24 C25 H25A 109.5 . . ?
 C24 C25 H25B 109.5 . . ?
 C24 C25 H25C 109.5 . . ?
 H25A C25 H25B 109.5 . . ?
 H25A C25 H25C 109.5 . . ?
 H25B C25 H25C 109.5 . . ?
 C24 C26 H26A 109.5 . . ?
 C24 C26 H26B 109.5 . . ?
 C24 C26 H26C 109.5 . . ?
 H26A C26 H26B 109.5 . . ?
 H26A C26 H26C 109.5 . . ?
 H26B C26 H26C 109.5 . . ?
 C24 C27 H27A 109.5 . . ?
 C24 C27 H27B 109.5 . . ?
 C24 C27 H27C 109.5 . . ?
 H27A C27 H27B 109.5 . . ?
 H27A C27 H27C 109.5 . . ?
 H27B C27 H27C 109.5 . . ?
 C14 C28 C30 109.30(19) . . ?
 C29 C28 C14 111.6(2) . . ?
 C29 C28 C30 109.5(2) . . ?
 C29 C28 C31 106.9(2) . . ?
 C31 C28 C14 111.5(2) . . ?
 C31 C28 C30 107.9(2) . . ?
 C28 C29 H29A 109.5 . . ?
 C28 C29 H29B 109.5 . . ?
 C28 C29 H29C 109.5 . . ?
 H29A C29 H29B 109.5 . . ?
 H29A C29 H29C 109.5 . . ?
 H29B C29 H29C 109.5 . . ?
 C28 C30 H30A 109.5 . . ?
 C28 C30 H30B 109.5 . . ?
 C28 C30 H30C 109.5 . . ?
 H30A C30 H30B 109.5 . . ?
 H30A C30 H30C 109.5 . . ?
 H30B C30 H30C 109.5 . . ?
 C28 C31 H31A 109.5 . . ?
 C28 C31 H31B 109.5 . . ?
 C28 C31 H31C 109.5 . . ?
 H31A C31 H31B 109.5 . . ?
 H31A C31 H31C 109.5 . . ?
 H31B C31 H31C 109.5 . . ?
 N8 C32 H32A 109.1 . . ?
 N8 C32 H32B 109.1 . . ?
 N8 C32 C33 112.35(18) . . ?
 H32A C32 H32B 107.9 . . ?
 C33 C32 H32A 109.1 . . ?
 C33 C32 H32B 109.1 . . ?
 N38 C33 C32 115.9(2) . . ?
 N38 C33 C34 122.2(2) . . ?
 C34 C33 C32 121.8(2) . . ?
 C33 C34 H34 120.1 . . ?
 C33 C34 C35 119.7(2) . . ?
 C35 C34 H34 120.1 . . ?
 C34 C35 H35 120.8 . . ?
 C34 C35 C36 118.4(2) . . ?
 C36 C35 H35 120.8 . . ?
 C35 C36 H36 120.6 . . ?
 C37 C36 C35 118.8(2) . . ?
 C37 C36 H36 120.6 . . ?
 N38 C37 C36 123.4(2) . . ?
 N38 C37 H37 118.3 . . ?
 C36 C37 H37 118.3 . . ?
 S3A S2A S1 106.6(4) . . ?
 S2A S3A S4 107.1(4) . . ?
 S3B S2B S1 106.5(8) . . ?
 S2B S3B S4 108.1(7) . . ?

loop_
  _geom_torsion_atom_site_label_1
  _geom_torsion_atom_site_label_2
  _geom_torsion_atom_site_label_3
  _geom_torsion_atom_site_label_4
  _geom_torsion
  _geom_torsion_site_symmetry_1
  _geom_torsion_site_symmetry_2
  _geom_torsion_site_symmetry_3
  _geom_torsion_site_symmetry_4
  _geom_torsion_publ_flag
 Mo1 O1 C1 C2 -136.29(19) . . . . ?
 Mo1 O1 C1 C6 44.1(3) . . . . ?
 Mo1 O2 C15 C10 22.3(3) . . . . ?
 Mo1 O2 C15 C14 -159.56(17) . . . . ?
 Mo1 N8 C7 C6 60.2(2) . . . . ?
 Mo1 N8 C9 C10 -61.1(2) . . . . ?
 Mo1 N8 C32 C33 -37.9(2) . . . . ?
 Mo1 N38 C33 C32 -18.9(2) . . . . ?
 Mo1 N38 C33 C34 163.75(18) . . . . ?
 Mo1 N38 C37 C36 -162.61(18) . . . . ?
 O1 C1 C2 C3 172.5(2) . . . . ?
 O1 C1 C2 C16 -9.5(3) . . . . ?
 O1 C1 C6 C5 -172.57(19) . . . . ?
 O1 C1 C6 C7 10.7(3) . . . . ?
 N8 C9 C10 C11 -148.9(2) . . . . ?
 N8 C9 C10 C15 31.1(3) . . . . ?
 N8 C32 C33 N38 39.0(3) . . . . ?
 N8 C32 C33 C34 -143.6(2) . . . . ?
 N38 C33 C34 C35 0.9(4) . . . . ?
 C1 C2 C3 C4 2.2(3) . . . . ?
 C1 C2 C16 C17 -170.1(2) . . . . ?
 C1 C2 C16 C18 -51.0(3) . . . . ?
 C1 C2 C16 C19 70.1(3) . . . . ?
 C1 C6 C7 N8 -63.1(3) . . . . ?
 C2 C1 C6 C5 7.8(3) . . . . ?
 C2 C1 C6 C7 -168.8(2) . . . . ?
 C2 C3 C4 C5 3.6(3) . . . . ?
 C2 C3 C4 C20 -175.5(2) . . . . ?
 C3 C2 C16 C17 7.8(3) . . . . ?
 C3 C2 C16 C18 126.8(2) . . . . ?
 C3 C2 C16 C19 -112.1(2) . . . . ?
 C3 C4 C5 C6 -3.8(3) . . . . ?
 C3 C4 C20 C21 -123.5(3) . . . . ?
 C3 C4 C20 C22 -2.0(3) . . . . ?
 C3 C4 C20 C23 117.0(3) . . . . ?
 C4 C5 C6 C1 -1.7(3) . . . . ?
 C4 C5 C6 C7 174.9(2) . . . . ?
 C5 C4 C20 C21 57.4(3) . . . . ?
 C5 C4 C20 C22 178.9(2) . . . . ?
 C5 C4 C20 C23 -62.1(3) . . . . ?
 C5 C6 C7 N8 120.3(2) . . . . ?
 C6 C1 C2 C3 -7.9(3) . . . . ?
 C6 C1 C2 C16 170.1(2) . . . . ?
 C7 N8 C9 C10 177.41(19) . . . . ?
 C7 N8 C32 C33 84.2(2) . . . . ?
 C9 N8 C7 C6 -178.99(19) . . . . ?
 C9 N8 C32 C33 -158.93(19) . . . . ?
 C9 C10 C11 C12 -179.2(2) . . . . ?
 C9 C10 C15 O2 -2.8(3) . . . . ?
 C9 C10 C15 C14 179.1(2) . . . . ?
 C10 C11 C12 C13 0.3(3) . . . . ?
 C10 C11 C12 C24 -178.7(2) . . . . ?
 C11 C10 C15 O2 177.2(2) . . . . ?
 C11 C10 C15 C14 -0.9(3) . . . . ?
 C11 C12 C13 C14 -1.6(3) . . . . ?
 C11 C12 C24 C25 173.9(2) . . . . ?
 C11 C12 C24 C26 -65.4(3) . . . . ?
 C11 C12 C24 C27 53.4(3) . . . . ?
 C12 C13 C14 C15 1.5(3) . . . . ?
 C12 C13 C14 C28 -179.5(2) . . . . ?
 C13 C12 C24 C25 -5.1(3) . . . . ?
 C13 C12 C24 C26 115.6(2) . . . . ?
 C13 C12 C24 C27 -125.6(2) . . . . ?
 C13 C14 C15 O2 -178.3(2) . . . . ?
 C13 C14 C15 C10 -0.2(3) . . . . ?
 C13 C14 C28 C29 126.6(2) . . . . ?
 C13 C14 C28 C30 -112.1(2) . . . . ?
 C13 C14 C28 C31 7.1(3) . . . . ?
 C15 C10 C11 C12 0.9(3) . . . . ?
 C15 C14 C28 C29 -54.5(3) . . . . ?
 C15 C14 C28 C30 66.8(3) . . . . ?
 C15 C14 C28 C31 -173.9(2) . . . . ?
 C16 C2 C3 C4 -175.8(2) . . . . ?
 C20 C4 C5 C6 175.3(2) . . . . ?
 C24 C12 C13 C14 177.4(2) . . . . ?
 C28 C14 C15 O2 2.7(3) . . . . ?
 C28 C14 C15 C10 -179.2(2) . . . . ?
 C32 N8 C7 C6 -60.4(2) . . . . ?
 C32 N8 C9 C10 59.1(2) . . . . ?
 C32 C33 C34 C35 -176.3(2) . . . . ?
 C33 N38 C37 C36 1.1(3) . . . . ?
 C33 C34 C35 C36 0.0(4) . . . . ?
 C34 C35 C36 C37 -0.3(4) . . . . ?
 C35 C36 C37 N38 -0.2(4) . . . . ?
 C37 N38 C33 C32 175.97(19) . . . . ?
 C37 N38 C33 C34 -1.4(3) . . . . ?

_shelx_res_file
;
TITL AL-071221_red2 in P-1
    2.res
    created by SHELXL-2018/3 at 09:55:15 on 03-Jun-2022
REM P-1 (#2 in standard setting)
CELL 1.54184 10.027341 10.062492 19.495682 101.1045 96.0498 101.0893
ZERR 2 0.000204 0.00025 0.000289 0.0017 0.0014 0.0019
LATT 1
SFAC C H Mo N O S
UNIT 72 100 2 4 4 8

L.S. 10
PLAN  12
SIZE 0.159 0.185 0.222
TEMP -148.15(10)
CONF
BOND
list 4
MORE -1
BOND $H
fmap 2
acta
REM <olex2.extras>
REM <HklSrc "%.\\2.hkl">
REM </olex2.extras>

WGHT    0.056500    0.811900
FVAR       4.41026   0.65126
MO1   3    0.365651    0.185649    0.246985    11.00000    0.01575    0.01832 =
         0.01987    0.00313    0.00202    0.00363
S1    6    0.558088    0.217664    0.199159    11.00000    0.01819    0.02336 =
         0.03158    0.00548    0.00643    0.00500
S4    6    0.411603    0.015606    0.296931    11.00000    0.03297    0.02513 =
         0.03336    0.01080    0.00807    0.01057
O1    5    0.420589    0.332926    0.331169    11.00000    0.01909    0.02048 =
         0.02115    0.00019   -0.00088    0.00455
O2    5    0.249631    0.068487    0.164685    11.00000    0.01844    0.02372 =
         0.02251   -0.00002    0.00469   -0.00161
N8    4    0.146977    0.179751    0.279480    11.00000    0.01858    0.01918 =
         0.01779    0.00143    0.00228    0.00212
N38   4    0.287020    0.361300    0.206031    11.00000    0.01693    0.02625 =
         0.01804    0.00321   -0.00035    0.00514
C1    1    0.365636    0.435140    0.364622    11.00000    0.02040    0.02146 =
         0.01581    0.00235    0.00028    0.00591
C2    1    0.444347    0.570378    0.391192    11.00000    0.01912    0.02386 =
         0.01910    0.00388    0.00076    0.00375
C3    1    0.373052    0.671201    0.417122    11.00000    0.02461    0.02163 =
         0.02188    0.00222    0.00276    0.00275
AFIX  43
H3    2    0.423376    0.764178    0.433860    11.00000   -1.20000
AFIX   0
C4    1    0.231568    0.642891    0.419822    11.00000    0.02482    0.02332 =
         0.01955    0.00317    0.00393    0.00699
C5    1    0.160855    0.505166    0.398937    11.00000    0.01915    0.02720 =
         0.01921    0.00504    0.00370    0.00490
AFIX  43
H5    2    0.065990    0.481873    0.402902    11.00000   -1.20000
AFIX   0
C6    1    0.226510    0.401254    0.372419    11.00000    0.02161    0.02149 =
         0.01677    0.00337   -0.00002    0.00273
C7    1    0.154994    0.250653    0.355191    11.00000    0.02144    0.02515 =
         0.01897    0.00318    0.00473    0.00459
AFIX  23
H7A   2    0.203990    0.201416    0.385456    11.00000   -1.20000
H7B   2    0.060571    0.243039    0.366996    11.00000   -1.20000
AFIX   0
C9    1    0.071455    0.033619    0.271807    11.00000    0.01984    0.02223 =
         0.02439    0.00479    0.00652    0.00112
AFIX  23
H9A   2   -0.018385    0.034933    0.288361    11.00000   -1.20000
H9B   2    0.124004   -0.010499    0.303364    11.00000   -1.20000
AFIX   0
C10   1    0.046111   -0.055746    0.197936    11.00000    0.01893    0.02130 =
         0.02261    0.00380    0.00339    0.00583
C11   1   -0.071896   -0.161237    0.178062    11.00000    0.02003    0.02207 =
         0.02466    0.00650    0.00540    0.00567
AFIX  43
H11   2   -0.134029   -0.173688    0.211035    11.00000   -1.20000
AFIX   0
C12   1   -0.101377   -0.248722    0.111476    11.00000    0.01676    0.02086 =
         0.02546    0.00510    0.00040    0.00443
C13   1   -0.007841   -0.228078    0.064631    11.00000    0.02178    0.02098 =
         0.01977    0.00153   -0.00010    0.00653
AFIX  43
H13   2   -0.025932   -0.288936    0.019350    11.00000   -1.20000
AFIX   0
C14   1    0.111634   -0.122459    0.080525    11.00000    0.01793    0.02163 =
         0.02362    0.00669    0.00111    0.00915
C15   1    0.137083   -0.036369    0.148541    11.00000    0.01746    0.01811 =
         0.02456    0.00345    0.00177    0.00479
C16   1    0.601449    0.604398    0.393886    11.00000    0.01773    0.02350 =
         0.02433    0.00072   -0.00058    0.00206
C17   1    0.664596    0.752024    0.436587    11.00000    0.02115    0.03120 =
         0.03658   -0.00461    0.00252   -0.00351
AFIX 137
H17A  2    0.637413    0.762751    0.483835    11.00000   -1.50000
H17B  2    0.631764    0.819093    0.412451    11.00000   -1.50000
H17C  2    0.764971    0.768576    0.440764    11.00000   -1.50000
AFIX   0
C18   1    0.664762    0.503484    0.429947    11.00000    0.02220    0.03980 =
         0.02863    0.00698   -0.00404    0.00430
AFIX 137
H18A  2    0.630055    0.408565    0.402123    11.00000   -1.50000
H18B  2    0.639626    0.509662    0.477512    11.00000   -1.50000
H18C  2    0.765018    0.527814    0.433223    11.00000   -1.50000
AFIX   0
C19   1    0.639252    0.593940    0.318871    11.00000    0.01852    0.03422 =
         0.02959    0.00544    0.00380    0.00117
AFIX 137
H19A  2    0.739202    0.621744    0.321679    11.00000   -1.50000
H19B  2    0.595277    0.655375    0.295249    11.00000   -1.50000
H19C  2    0.607361    0.498039    0.291898    11.00000   -1.50000
AFIX   0
C20   1    0.155046    0.757930    0.443703    11.00000    0.03004    0.02474 =
         0.03327    0.00493    0.01056    0.00855
C21   1    0.081180    0.728888    0.505755    11.00000    0.03697    0.03416 =
         0.03599    0.00613    0.01616    0.01313
AFIX 137
H21A  2    0.030436    0.801371    0.519709    11.00000   -1.50000
H21B  2    0.148841    0.728284    0.545756    11.00000   -1.50000
H21C  2    0.016933    0.638399    0.491559    11.00000   -1.50000
AFIX   0
C22   1    0.249718    0.901230    0.465866    11.00000    0.03769    0.02447 =
         0.06105   -0.00078    0.02034    0.00684
AFIX 137
H22A  2    0.195285    0.970976    0.478525    11.00000   -1.50000
H22B  2    0.298029    0.921091    0.426603    11.00000   -1.50000
H22C  2    0.316830    0.903941    0.506750    11.00000   -1.50000
AFIX   0
C23   1    0.048768    0.759103    0.380621    11.00000    0.03588    0.03664 =
         0.04425    0.01417    0.00952    0.01852
AFIX 137
H23A  2   -0.018821    0.670657    0.368161    11.00000   -1.50000
H23B  2    0.095724    0.772171    0.340019    11.00000   -1.50000
H23C  2    0.001923    0.835226    0.393631    11.00000   -1.50000
AFIX   0
C24   1   -0.234540   -0.362406    0.090718    11.00000    0.01724    0.02154 =
         0.02812    0.00358    0.00051    0.00118
C25   1   -0.255368   -0.437077    0.012977    11.00000    0.02698    0.03089 =
         0.02903    0.00329   -0.00134   -0.00441
AFIX 137
H25A  2   -0.258109   -0.369510   -0.016963    11.00000   -1.50000
H25B  2   -0.342153   -0.506503    0.001959    11.00000   -1.50000
H25C  2   -0.179187   -0.483061    0.004126    11.00000   -1.50000
AFIX   0
C26   1   -0.229410   -0.469746    0.136810    11.00000    0.02798    0.02382 =
         0.03133    0.00421    0.00082    0.00180
AFIX 137
H26A  2   -0.149621   -0.510963    0.129667    11.00000   -1.50000
H26B  2   -0.313583   -0.542668    0.123493    11.00000   -1.50000
H26C  2   -0.221755   -0.424050    0.186660    11.00000   -1.50000
AFIX   0
C27   1   -0.359863   -0.299474    0.103451    11.00000    0.01878    0.03028 =
         0.04652    0.00466    0.00224    0.00286
AFIX 137
H27A  2   -0.350823   -0.254281    0.153463    11.00000   -1.50000
H27B  2   -0.443524   -0.373094    0.090666    11.00000   -1.50000
H27C  2   -0.365303   -0.230844    0.074360    11.00000   -1.50000
AFIX   0
C28   1    0.211366   -0.103135    0.026770    11.00000    0.02169    0.02447 =
         0.02291    0.00353    0.00387    0.00766
C29   1    0.239094    0.045680    0.015481    11.00000    0.03884    0.03427 =
         0.02966    0.01301    0.01051    0.01004
AFIX 137
H29A  2    0.151617    0.070964    0.002703    11.00000   -1.50000
H29B  2    0.294798    0.051927   -0.022644    11.00000   -1.50000
H29C  2    0.288601    0.109330    0.059165    11.00000   -1.50000
AFIX   0
C30   1    0.347877   -0.138546    0.053188    11.00000    0.02494    0.03530 =
         0.03358    0.00734    0.00785    0.01289
AFIX 137
H30A  2    0.387121   -0.078105    0.099463    11.00000   -1.50000
H30B  2    0.412374   -0.124401    0.019486    11.00000   -1.50000
H30C  2    0.330933   -0.235647    0.057411    11.00000   -1.50000
AFIX   0
C31   1    0.153536   -0.199161   -0.045762    11.00000    0.03472    0.04369 =
         0.02498    0.00234    0.00846    0.00463
AFIX 137
H31A  2    0.136497   -0.295957   -0.041023    11.00000   -1.50000
H31B  2    0.219972   -0.185262   -0.078553    11.00000   -1.50000
H31C  2    0.067207   -0.177590   -0.064032    11.00000   -1.50000
AFIX   0
C32   1    0.069527    0.249692    0.233618    11.00000    0.01697    0.02716 =
         0.02272    0.00383    0.00261    0.00619
AFIX  23
H32A  2   -0.006046    0.278751    0.257310    11.00000   -1.20000
H32B  2    0.028028    0.182957    0.188701    11.00000   -1.20000
AFIX   0
C33   1    0.158664    0.373887    0.217741    11.00000    0.01812    0.02549 =
         0.01862    0.00490    0.00089    0.00439
C34   1    0.110781    0.492151    0.212420    11.00000    0.02174    0.03151 =
         0.02661    0.00754    0.00267    0.00987
AFIX  43
H34   2    0.020728    0.498262    0.221610    11.00000   -1.20000
AFIX   0
C35   1    0.194670    0.601589    0.193642    11.00000    0.03139    0.02809 =
         0.03254    0.01232    0.00205    0.01182
AFIX  43
H35   2    0.163354    0.683506    0.189744    11.00000   -1.20000
AFIX   0
C36   1    0.325616    0.588751    0.180649    11.00000    0.02665    0.02934 =
         0.02950    0.01286    0.00471    0.00465
AFIX  43
H36   2    0.385655    0.661661    0.167444    11.00000   -1.20000
AFIX   0
C37   1    0.367006    0.467930    0.187282    11.00000    0.01936    0.02754 =
         0.02106    0.00533    0.00191    0.00357
AFIX  43
H37   2    0.456609    0.459755    0.178124    11.00000   -1.20000
AFIX   0
PART 1
S2A   6    0.687989    0.075703    0.212373    21.00000    0.02381    0.03193 =
         0.05188    0.01370    0.01188    0.01417
S3A   6    0.616261   -0.027241    0.283542    21.00000    0.05174    0.07312 =
         0.06717    0.04420    0.02506    0.04608
PART 2
S2B   6    0.701382    0.090957    0.231360   -21.00000    0.02313    0.04982 =
         0.08960    0.02700    0.00874    0.01577
S3B   6    0.596999   -0.044728    0.277923   -21.00000    0.04283    0.02791 =
         0.06011    0.01225    0.01725    0.02024
HKLF 4


REM  AL-071221_red2 in P-1
REM wR2 = 0.0979, GooF = S = 1.036, Restrained GooF = 1.036 for all data
REM R1 = 0.0363 for 6890 Fo > 4sig(Fo) and 0.0381 for all 7327 data
REM 437 parameters refined using 0 restraints

END

WGHT      0.0565      0.8119

REM Highest difference peak  0.886,  deepest hole -0.768,  1-sigma level  0.084
Q1    1   0.3880  0.2126  0.2991  11.00000  0.05    0.89
Q2    1   0.3291  0.1605  0.1968  11.00000  0.05    0.84
Q3    1   0.3919  0.2824  0.2861  11.00000  0.05    0.74
Q4    1   0.3484  0.0905  0.2101  11.00000  0.05    0.64
Q5    1   0.3780  0.2579  0.2225  11.00000  0.05    0.52
Q6    1   0.6151 -0.0117  0.3349  11.00000  0.05    0.48
Q7    1   0.4771  0.1986  0.1576  11.00000  0.05    0.47
Q8    1   0.3578  0.1229  0.2739  11.00000  0.05    0.46
Q9    1   0.4511  0.1148  0.2160  11.00000  0.05    0.43
Q10   1   0.3943  0.1985  0.1386  11.00000  0.05    0.42
Q11   1   0.4591  0.3113  0.2556  11.00000  0.05    0.40
Q12   1  -0.0763 -0.2345  0.1472  11.00000  0.05    0.37
;
_shelx_res_checksum                8586
_shelx_hkl_file
;
   0   0   1 2959.46 126.277  35
   0   0   2 495097. 18889.7  35
   0   0   3 12791.0 533.734  35
   0   0   4 173205. 6659.38  35
   0   0   5 197253. 7593.12  35
   0   0   6 87907.4 3447.48  35
   0   0  -7 8694.37 352.483   2
   0   0   7 10131.6 458.311  35
   0   0   8 437.815 95.0924  35
   0   0   9 988.705 138.340  35
   0   0  10 9602.68 530.937  35
   0   0  11 1401.15 315.734  34
   0   0  11 1594.71 187.588  35
   0   0  11 1184.22 246.714  36
   0   0  12 1364.46 336.107  34
   0   0  12 833.338 225.760  36
   0   0  12 1383.32 179.727  35
   0   0  13 982.494 165.434  35
   0   0  13 561.467 308.232  21
   0   0  13 758.734 325.740  20
   0   0  13 434.772 249.407  26
   0   0  13 996.582 288.783  25
   0   0  13 782.209 269.005  22
   0   0  13 602.873 235.011  34
   0   0  13 555.508 228.368  28
   0   0  13 1196.91 368.215  30
   0   0  13 914.836 298.113  29
   0   0  14 1568.77 471.174  20
   0   0  14 1591.32 332.248  16
   0   0  14 1703.04 473.232  21
   0   0  14 1687.17 417.601  34
   0   0  14 2139.65 443.646  28
   0   0  14 1784.79 426.627  31
   0   0  14 2248.22 502.183  30
   0   0  14 1480.33 381.694  29
   0   0  14 2086.92 461.918  26
   0   0  14 1978.47 449.438  22
   0   0  14 2067.60 423.692  25
   0   0  14 1973.06 398.552  23
   0   0  15 774.227 256.577  37
   0   0  15 674.902 357.326  20
   0   0  15 1118.29 440.331  21
   0   0  15 1035.48 319.257  28
   0   0  15 820.968 338.177  34
   0   0  15 789.219 301.419  31
   0   0  15 1224.38 386.456  30
   0   0  15 795.880 289.649  29
   0   0  15 785.224 323.584  22
   0   0  15 609.635 288.495  26
   0   0  15 1154.41 334.268  23
   0   0  15 615.880 259.773  25
   0   0  16 14023.2 1212.78  37
   0   0  16 15107.9 1573.38  20
   0   0  16 16419.5 1547.30  21
   0   0  16 15857.0 1413.82  34
   0   0  16 17062.1 1529.99  30
   0   0  16 16060.6 1360.63  28
   0   0  16 15250.9 1348.80  31
   0   0  16 15155.9 1293.00  29
   0   0  16 14340.7 1348.28  22
   0   0  16 16593.4 1329.48  25
   0   0  16 17138.2 1451.97  26
   0   0  16 18218.9 1368.23  23
   0   0  17 116.350 167.738  37
   0   0  17-61.0065 300.787  21
   0   0  17 67.9517 321.883  20
   0   0  17 213.982 194.116  29
   0   0  17 225.189 204.279  31
   0   0  17-45.2058 185.473  28
   0   0  17 159.035 251.124  34
   0   0  17 329.415 249.009  30
   0   0  17 41.1678 168.913  25
   0   0  17 510.810 288.004  26
   0   0  17 200.324 237.244  22
   0   0  18 14644.9 1206.46  37
   0   0  18 13271.8 1482.89  20
   0   0  18 16810.9 1550.27  21
   0   0  18 12928.7 1309.73  34
   0   0  18 14249.6 1266.44  28
   0   0  18 14523.4 1258.32  29
   0   0  18 14403.6 1228.21  25
   0   0  18 13766.1 1318.86  22
   0   0  18 16543.7 1415.38  26
   0   0  19 2212.80 438.579  37
   0   0  19 1424.23 522.614  20
   0   0  19 2341.54 569.047  21
   0   0  19 2244.24 457.819  29
   0   0  19 2261.62 507.746  26
   0   0  19 2951.12 511.978  25
   0   0  19 1691.93 461.737  22
   0   0  20 17862.5 1300.67  37
   0   0  20 15609.2 1551.58  20
   0   0  20 22649.9 1688.83  21
   0   0  20 18108.2 1441.78  22
   0   0  20 18178.6 1488.98  26
   0   0  20 17968.4 1337.54  25
   0   0  21 5049.35 583.381  37
   0   0  21 4141.32 750.754  20
   0   0  21 5287.29 741.867  21
   0   0  21 6755.89 803.759  25
   0   0  21 5065.36 658.114  22
   0   0  22 14962.1 1017.00  37
   0   0  23 5729.99 498.910  37
   0  -1  23 17784.0 1092.54  37
   0  -1  22 2304.18 380.263  37
   0  -1  22 2466.21 467.654  22
   0  -1  22 1732.66 661.769  20
   0  -1  21 13298.8 1207.24  22
   0  -1  21 15726.9 1233.22  25
   0  -1  21 13236.6 1343.48  21
   0  -1  20 697.294 403.220  21
   0  -1  20 791.546 344.619  22
   0  -1  20 953.768 498.772  26
   0  -1  20 1517.74 502.173  25
   0  -1  20 899.157 331.787  34
   0  -1  19 41990.8 2632.60  21
   0  -1  19 35460.5 2359.66  22
   0  -1  19 38349.2 2191.04  25
   0  -1  19 35426.3 2280.53  26
   0  -1  19 36192.2 2391.89  34
   0  -1  19 36115.2 2175.18  28
   0  -1  19 35228.0 2126.29  29
   0  -1  18 1401.60 487.723  21
   0  -1  18 923.253 318.458  25
   0  -1  18 1357.00 441.977  22
   0  -1  18 1566.41 396.835  23
   0  -1  18 851.181 338.661  26
   0  -1  18 1037.56 384.523  31
   0  -1  18 736.138 283.538  29
   0  -1  18 1442.35 458.141  30
   0  -1  18 1530.18 452.567  34
   0  -1  18 1209.92 349.605  28
   0  -1  17 30162.7 2245.45  21
   0  -1  17 34438.6 2255.79  30
   0  -1  17 30799.4 1972.28  28
   0  -1  17 26859.6 1828.23  29
   0  -1  17 28968.0 2058.16  34
   0  -1  17 25510.6 1966.47  31
   0  -1  17 27397.3 2033.84  22
   0  -1  17 32067.0 2008.47  23
   0  -1  17 27038.8 1958.75  26
   0  -1  17 27825.2 1839.36  25
   0  -1  16 3515.01 345.461  35
   0  -1  16 3981.30 737.045  21
   0  -1  16 3344.10 546.343  29
   0  -1  16 3305.48 565.587  28
   0  -1  16 3220.38 647.108  30
   0  -1  16 3834.60 663.057  31
   0  -1  16 4060.79 663.785  34
   0  -1  16 3228.86 588.530  26
   0  -1  16 3333.71 536.554  25
   0  -1  16 3476.75 578.608  23
   0  -1  15 28222.3 1301.88  35
   0  -1  15 27321.1 2017.89  21
   0  -1  15 22994.9 1810.60  31
   0  -1  15 23456.4 1659.53  29
   0  -1  15 28283.1 2009.81  30
   0  -1  15 25536.5 1768.18  28
   0  -1  15 25703.3 1847.91  34
   0  -1  15 27799.5 1807.57  23
   0  -1  15 24720.9 1774.65  26
   0  -1  15 26569.4 1719.36  25
   0  -1  14 66.9670 144.785  37
   0  -1  14 33.5503 83.7641  35
   0  -1  14 50.3960 228.547  21
   0  -1  14-33.3292 120.579  29
   0  -1  14 85.8905 155.365  34
   0  -1  14 44.9890 184.550  31
   0  -1  14 195.192 200.174  30
   0  -1  14-37.5947 125.921  28
   0  -1  14 364.668 202.724  25
   0  -1  14 39.2873 142.133  26
   0  -1  14 36.9587 167.611  23
   0  -1  13 15169.9 755.582  35
   0  -1  13 13074.8 1031.56  37
   0  -1  13 12048.8 1200.50  20
   0  -1  13 13991.4 1263.58  21
   0  -1  13 12331.2 1071.77  26
   0  -1  13 10997.0 970.784  25
   0  -1  13 12739.0 1033.79  29
   0  -1  13 12490.2 1158.07  31
   0  -1  12 10677.2 605.260  35
   0  -1  11 4395.49 321.828  35
   0  -1  10 7183.50 415.395  35
   0  -1   9 27020.5 1170.01  35
   0  -1   8 42559.7 1747.53  35
   0  -1   7 498.747 77.7680  35
   0   1  -6 34567.0 1356.70  38
   0  -1   6 39008.9 1431.67  35
   0   1  -5 40628.9 1567.14  38
   0   1  -4 340874. 13016.3  38
   0  -1   4 341732. 13035.8  18
   0   1  -3 809282. 31115.5  38
   0  -1   3 830565. 31136.9  18
   0   1  -2 140266. 5363.04  38
   0   1  -1 451644. 17223.7  38
   0   1   0 43586.7 1679.56  38
   0  -1  -1 23755.7 935.766  18
   0  -1  -1 23233.5 914.637   2
   0   1   2 131955. 5042.74  38
   0  -1  -2 132253. 5064.47  18
   0  -1  -2 131519. 5043.68   2
   0   1   3 963518. 36936.5  38
   0   1   3 908692. 36972.6  15
   0  -1  -3 963932. 36956.6  18
   0  -1  -3 999999. 36937.5   2
   0   1   4 341941. 13964.4  35
   0   1   4 351532. 13910.7  38
   0  -1  -4 371452. 13933.5  18
   0   1   4 340755. 13948.1  15
   0  -1  -4 389178. 13911.4   2
   0   1   5 264924. 9836.27  35
   0   1   5 253943. 9755.39  38
   0   1   5 256527. 9799.47  15
   0   1   6 120242. 3079.31  35
   0   1   6 112653. 2994.99  15
   0   1   7 103909. 3962.48  35
   0   1   7 98793.1 3887.57  15
   0   1   8 38155.7 1540.50  35
   0   1   8 35524.7 1447.46  15
   0   1   9 223338. 8685.49  35
   0   1  10 31186.7 1645.12  36
   0   1  11 25665.3 1475.89  36
   0   1  12 926.137 279.801  28
   0   1  12 882.084 280.684  29
   0   1  12 1059.25 250.868  36
   0   1  12 898.618 332.823  20
   0   1  13 647.756 214.157  36
   0   1  13 383.685 191.824  16
   0   1  13 348.169 264.310  21
   0   1  13 503.884 267.741  20
   0   1  13 659.006 260.595  22
   0   1  13 946.181 270.313  23
   0   1  13 634.503 283.989  30
   0   1  13 649.204 261.148  28
   0   1  13 560.475 229.534  29
   0   1  14 1272.22 430.454  20
   0   1  14 1089.25 301.751  16
   0   1  14 1139.74 415.882  21
   0   1  14 1423.67 382.715  22
   0   1  14 1441.35 389.922  28
   0   1  14 1254.92 394.448  30
   0   1  14 1179.85 350.611  29
   0   1  15 283.839 200.522  16
   0   1  15 406.740 337.375  21
   0   1  15 478.886 327.704  20
   0   1  15 368.682 244.461  28
   0   1  15 493.360 280.809  30
   0   1  15 477.569 245.169  29
   0   1  15 268.681 203.566  22
   0   1  16 37.6098 145.507  37
   0   1  16 126.215 272.899  20
   0   1  16 121.152 274.739  21
   0   1  16 252.093 190.756  16
   0   1  16-47.1973 144.358  28
   0   1  16 90.4892 195.674  29
   0   1  16 509.828 261.326  22
   0   1  17 2751.48 489.861  37
   0   1  17 2990.51 680.636  21
   0   1  17 2238.28 601.944  20
   0   1  17 3270.48 584.110  28
   0   1  17 3143.56 570.037  29
   0   1  17 2048.83 511.807  22
   0   1  18 1907.10 408.589  37
   0   1  18 1619.20 543.051  20
   0   1  18 1594.05 521.578  21
   0   1  18 1886.04 458.120  29
   0   1  18 1617.58 431.326  22
   0   1  18 2452.12 556.959  26
   0   1  19 11766.7 1008.62  37
   0   1  19 13927.2 1324.30  21
   0   1  19 8372.63 1142.36  20
   0   1  19 9928.49 1023.23  22
   0   1  19 12235.4 1200.68  26
   0   1  20 8265.92 808.332  37
   0   1  20 9818.01 1053.82  21
   0   1  20 10846.7 943.535  25
   0   1  20 10171.8 1101.62  26
   0   1  21 7874.50 737.851  37
   0   1  21 9682.11 963.079  21
   0   1  21 11227.9 940.908  25
   0   1  22 14396.3 854.830  37
   0   1  22 6941.38 836.037  25
   0  -2  22 9697.09 814.724  37
   0  -2  22 7873.72 1108.99  20
   0  -2  21 3548.87 605.553  34
   0  -2  21 4313.53 574.054  37
   0  -2  21 3358.24 709.395  20
   0  -2  20 15735.2 1256.83  37
   0  -2  20 17657.2 1685.51  21
   0  -2  20 16889.3 1638.83  20
   0  -2  20 15903.3 1398.74  31
   0  -2  20 17069.6 1436.29  34
   0  -2  20 17215.6 1356.11  25
   0  -2  19 10945.7 1029.92  37
   0  -2  19 9917.61 1280.05  20
   0  -2  19 11897.6 1313.07  21
   0  -2  19 11753.8 1207.29  31
   0  -2  19 10317.4 1136.29  34
   0  -2  19 9842.60 1025.07  26
   0  -2  19 11096.3 1059.83  25
   0  -2  19 10476.7 1038.77  23
   0  -2  19 11491.5 1163.64  22
   0  -2  18 12510.6 1118.41  37
   0  -2  18 10809.1 1349.87  20
   0  -2  18 11243.8 1273.58  21
   0  -2  18 10495.2 973.009  29
   0  -2  18 12192.1 1228.32  34
   0  -2  18 11956.4 1265.75  31
   0  -2  18 14278.1 1352.38  30
   0  -2  18 11632.7 1070.68  28
   0  -2  18 14486.5 1226.97  23
   0  -2  18 10521.3 1151.64  22
   0  -2  18 12336.0 1135.48  26
   0  -2  18 11203.8 1024.43  25
   0  -2  17 8340.45 887.407  37
   0  -2  17 7958.09 1125.66  20
   0  -2  17 8857.65 1122.60  21
   0  -2  17 9343.16 1095.81  30
   0  -2  17 8524.90 1002.71  34
   0  -2  17 7082.03 980.100  31
   0  -2  17 8655.24 918.930  28
   0  -2  17 8601.60 844.897  29
   0  -2  17 8706.53 863.786  25
   0  -2  17 8319.97 937.216  23
   0  -2  17 7737.34 959.565  22
   0  -2  17 8521.42 922.743  26
   0  -2  16 55285.7 3031.40  34
   0  -2  16 56711.3 2843.20  37
   0  -2  16 54102.9 3279.31  20
   0  -2  16 54961.9 3203.27  21
   0  -2  16 46865.4 2746.33  28
   0  -2  16 49244.2 3022.72  31
   0  -2  16 46037.5 2619.24  29
   0  -2  16 54075.8 3112.70  30
   0  -2  16 50386.5 2839.42  23
   0  -2  16 48966.0 2661.53  25
   0  -2  16 47701.0 2764.11  26
   0  -2  16 49191.5 2890.50  22
   0  -2  15 8292.93 833.221  37
   0  -2  15 7891.23 1001.24  21
   0  -2  15 7089.90 1001.78  20
   0  -2  15 5816.11 863.139  31
   0  -2  15 8134.60 990.334  30
   0  -2  15 7268.45 749.220  29
   0  -2  15 7269.35 806.066  26
   0  -2  15 6794.27 732.970  25
   0  -2  15 6936.48 874.525  22
   0  -2  15 6655.73 815.818  23
   0  -2  14 47986.7 2472.78  37
   0  -2  14 45324.5 2834.19  19
   0  -2  14 50405.4 2851.38  21
   0  -2  14 43904.5 2807.92  20
   0  -2  14 50648.0 2660.92  27
   0  -2  14 49527.1 2810.95  30
   0  -2  14 42242.8 2678.94  31
   0  -2  14 41377.7 2346.48  29
   0  -2  14 42747.0 2558.63  22
   0  -2  14 42574.6 2516.02  23
   0  -2  14 45252.4 2483.95  26
   0  -2  14 44046.7 2371.54  25
   0  -2  13 83973.2 3760.57  37
   0  -2  13 87559.4 4171.47  21
   0  -2  13 83840.2 4186.88  20
   0  -2  13 73473.9 3807.66  23
   0  -2  13 77071.5 3866.32  22
   0  -2  13 73620.9 3970.63  31
   0  -2  12 61020.1 2937.09  37
   0  -2  11 3667.10 449.862  37
   0   2  -8 1823.84 103.393  38
   0   2  -7 11354.5 476.151  38
   0  -2   7 11667.0 518.704  18
   0   2  -6 106113. 4045.32  38
   0  -2   6 102942. 4090.16  18
   0   2  -5 56979.5 2171.46  38
   0  -2   5 53726.1 2210.30  18
   0   2  -4 53543.6 2068.11  38
   0  -2   4 52361.6 2112.67  18
   0   2  -3 14758.8 619.287  38
   0  -2   3 16117.2 665.476  18
   0   2  -2 5503.36 249.526  38
   0   2  -1 189636. 7330.33  38
   0  -2   1 195160. 7377.11  18
   0  -2   0 947.822 102.658  18
   0   2   1 120334. 4680.81  38
   0  -2  -1 124979. 4730.60  18
   0   2   2 15872.6 653.348  38
   0  -2  -2 16491.8 699.909  18
   0   2   3 138229. 5362.32  38
   0  -2  -3 142567. 5407.48  18
   0   2   4 1488.86 92.1285  38
   0  -2  -4 1537.40 128.257  18
   0   2   4 1369.25 128.300  15
   0   2   5 35859.6 1405.54  38
   0  -2  -5 37857.8 1459.54  18
   0   2   5 33790.1 1461.86  15
   0   2   6 106407. 4033.88  38
   0   2   6 100891. 4094.73  15
   0   2   7 280017. 10968.0  38
   0   2   7 314906. 11051.1  15
   0   2   8 41769.1 1693.45  15
   0   2   9 31353.9 1894.90  34
   0   2   9 34767.0 1366.66  15
   0   2  10 35624.5 1848.92  36
   0   2  10 36135.5 2114.07  34
   0   2  11 18412.0 1219.16  36
   0   2  11 21456.6 1397.75  29
   0   2  11 20121.3 1492.84  34
   0   2  11 21754.9 1493.67  28
   0   2  11 20811.5 1471.01  26
   0   2  11 17306.3 1309.29  25
   0   2  12 20194.4 1348.77  36
   0   2  12 19450.3 1432.16  16
   0   2  12 20880.9 1624.14  20
   0   2  12 23538.8 1630.72  28
   0   2  12 21833.9 1628.87  34
   0   2  12 22847.1 1521.42  29
   0   2  12 22108.0 1498.57  25
   0   2  12 19775.3 1456.32  22
   0   2  12 24509.6 1657.39  26
   0   2  13 10136.3 879.549  36
   0   2  13 9603.88 1078.05  20
   0   2  13 9622.16 943.798  16
   0   2  13 9762.94 942.322  25
   0   2  13 11349.6 1090.13  26
   0   2  13 9329.56 952.865  22
   0   2  13 9827.79 1034.62  28
   0   2  14 16129.5 1508.97  21
   0   2  14 15075.8 1424.16  20
   0   2  14 13210.2 1173.75  16
   0   2  14 14794.9 1335.68  26
   0   2  14 12335.2 1174.30  22
   0   2  14 15250.8 1259.79  25
   0   2  14 17358.2 1390.90  28
   0   2  15 12703.8 1350.44  20
   0   2  15 14098.5 1205.73  16
   0   2  15 15118.0 1502.25  21
   0   2  15 17332.9 1458.95  26
   0   2  15 12166.9 1172.35  22
   0   2  15 13688.5 1196.18  25
   0   2  16 12016.9 1062.22  37
   0   2  16 11488.5 1301.32  20
   0   2  16 15154.0 1494.43  21
   0   2  16 13006.5 1137.89  16
   0   2  16 15582.6 1245.29  25
   0   2  16 12689.3 1276.57  26
   0   2  16 11718.1 1150.45  22
   0   2  17 7795.70 815.861  37
   0   2  17 5632.97 900.813  20
   0   2  17 9951.11 1171.56  21
   0   2  17 7779.38 831.446  16
   0   2  17 8684.56 1011.40  26
   0   2  17 5991.96 786.735  22
   0   2  17 8842.48 918.053  25
   0   2  18 587.596 246.669  37
   0   2  18 697.542 337.010  20
   0   2  18 504.261 325.857  21
   0   2  18 597.602 266.380  25
   0   2  18 673.875 309.571  26
   0   2  19 8547.61 838.987  37
   0   2  19 10329.5 1118.66  21
   0   2  19 11818.6 1138.67  26
   0   2  19 11147.9 969.183  25
   0   2  20 2891.37 417.596  37
   0   2  20 3382.27 588.990  21
   0   2  20 2860.09 458.485  25
   0   2  21 18256.6 1117.00  37
   0   2  22 317.356 115.645  37
   0  -3  22 69.5745 178.115  34
   0  -3  22 380.561 231.854  22
   0  -3  21 4155.55 558.937  37
   0  -3  21 4527.13 842.109  20
   0  -3  21 4558.31 655.580  34
   0  -3  21 5327.37 722.979  31
   0  -3  21 5159.03 715.009  22
   0  -3  20 34.1145 154.746  37
   0  -3  20-62.6556 320.572  20
   0  -3  20 273.056 1242.80  21
   0  -3  20 353.896 267.754  31
   0  -3  20-46.6732 168.882  34
   0  -3  20 183.471 250.891  22
   0  -3  20 194.086 176.069  23
   0  -3  19 36591.3 2192.58  37
   0  -3  19 32379.3 2562.37  20
   0  -3  19 41494.3 2859.96  21
   0  -3  19 39334.4 2550.16  31
   0  -3  19 39829.7 2461.01  34
   0  -3  19 36341.1 2395.64  22
   0  -3  19 39766.7 2362.42  23
   0  -3  18 5780.66 484.114  35
   0  -3  18 5815.62 723.015  37
   0  -3  18 5031.13 1229.13  21
   0  -3  18 5140.31 943.205  20
   0  -3  18 5469.34 799.284  34
   0  -3  18 5306.99 848.853  31
   0  -3  18 6624.54 911.638  30
   0  -3  18 6139.83 804.413  23
   0  -3  18 5460.58 856.304  25
   0  -3  18 5186.27 796.433  22
   0  -3  17 14370.6 833.889  35
   0  -3  17 15895.8 1235.04  37
   0  -3  17 13478.7 1485.48  21
   0  -3  17 13063.4 1475.27  20
   0  -3  17 12953.3 1121.78  28
   0  -3  17 14971.8 1427.84  30
   0  -3  17 12886.2 1375.83  31
   0  -3  17 12726.1 1260.87  22
   0  -3  17 12428.2 1108.83  26
   0  -3  17 11842.2 1114.71  25
   0  -3  17 13946.9 1272.78  23
   0  -3  16 90158.3 3453.98  35
   0  -3  16 84954.2 3964.09  37
   0  -3  16 80219.9 4379.03  21
   0  -3  16 76611.4 4406.35  20
   0  -3  16 75297.5 4260.20  31
   0  -3  16 83062.2 4352.26  30
   0  -3  16 73185.6 3819.39  26
   0  -3  16 75009.5 4089.84  22
   0  -3  16 77518.8 4059.25  23
   0  -3  16 75121.1 3763.92  25
   0  -3  15 524.549 229.948  37
   0  -3  15 376.484 138.631  35
   0  -3  15 342.441 312.620  21
   0  -3  15 599.460 407.652  19
   0  -3  15 726.844 414.451  20
   0  -3  15 426.040 291.769  30
   0  -3  15 665.483 339.543  31
   0  -3  15 266.854 251.318  23
   0  -3  15 615.458 254.018  25
   0  -3  15 492.021 280.834  27
   0  -3  15 363.952 249.405  22
   0  -3  14 100053. 4659.11  37
   0  -3  14 117243. 4233.48  35
   0  -3  14 104849. 5193.51  20
   0  -3  14 101498. 5322.64  19
   0  -3  14 104440. 5121.84  21
   0  -3  14 89688.5 4952.14  31
   0  -3  14 104362. 4836.36  27
   0  -3  14 92926.4 4495.21  25
   0  -3  14 95708.5 4824.19  22
   0  -3  14 89582.2 4773.43  23
   0  -3  13 30784.9 1803.95  37
   0  -3  13 35756.8 1476.82  35
   0  -3  13 31126.3 2121.96  21
   0  -3  13 31303.4 2154.32  20
   0  -3  13 31300.3 2314.07  19
   0  -3  13 29026.0 1915.84  22
   0  -3  13 25199.4 1862.71  23
   0  -3  13 27429.1 2042.67  31
   0  -3  12 26749.3 1637.55  37
   0  -3  12 30589.4 1356.85  35
   0  -3  11 1841.13 330.339  33
   0  -3  11 2188.03 341.947  37
   0  -3  11 2328.95 217.588  35
   0  -3  10 115430. 5481.04  33
   0  -3  10 135820. 5150.93  35
   0   3  -9 2246.70 140.481  38
   0  -3   9 2419.27 199.585  35
   0  -3   8 98218.9 3629.73  35
   0   3  -8 90341.9 3553.94  38
   0  -3   8 88133.6 3620.66  18
   0  -3   7 32829.7 1294.47  35
   0   3  -7 30370.2 1239.52  38
   0  -3   7 29752.0 1302.33  18
   0   3  -6 64112.9 2569.98  38
   0  -3   6 71185.3 2612.62  35
   0  -3   6 62651.2 2632.80  18
   0   3  -5 168029. 6370.60  38
   0  -3   5 160564. 6433.53  18
   0   3  -4 73051.4 2863.38  38
   0  -3   4 74470.4 2934.33  18
   0   3  -3 98782.8 3826.74  38
   0   3  -2 1139.80 91.2007  38
   0   3  -1 98375.5 3826.40  38
   0  -3   1 99823.2 3897.20  18
   0  -3   0 36107.6 1507.03  18
   0   3   1 802.319 77.2772  38
   0  -3  -1 826.070 114.491  18
   0   3   2 7931.91 367.679  38
   0  -3  -2 8245.55 430.720  18
   0   3   3 2529.78 147.028  38
   0  -3  -3 1909.03 180.140  18
   0   3   4 36795.9 1476.32  38
   0  -3  -4 39332.6 1561.49  18
   0   3   4 35564.9 1555.76  15
   0   3   5 18829.5 790.186  38
   0   3   5 17482.7 856.749  15
   0   3   6 98161.3 3852.93  38
   0   3   6 94786.8 3935.60  15
   0  -3  -6 108168. 3945.49  18
   0   3   7 23406.9 964.468  38
   0   3   7 25124.5 1054.01  15
   0   3   8 20392.2 1221.33  36
   0   3   8 23364.5 1002.49  15
   0   3   9 1722.00 290.222  36
   0   3   9 2117.95 180.245  15
   0   3  10 50502.2 2710.24  36
   0   3  10 60017.0 2377.96  15
   0   3  10 66673.9 3057.82  29
   0   3  10 62056.5 3089.84  26
   0   3  10 53190.0 2921.82  25
   0   3  11 79.3942 102.369  36
   0   3  11 120.849 155.804  20
   0   3  11 108.721 156.712  29
   0   3  11 243.926 215.301  26
   0   3  11-35.3020 144.822  25
   0   3  12 18632.0 1275.50  36
   0   3  12 17570.8 1465.10  20
   0   3  12 15610.3 1335.84  16
   0   3  12 20374.8 1476.83  29
   0   3  12 20674.4 1470.57  25
   0   3  12 21192.7 1556.61  26
   0   3  13 14653.8 1133.93  36
   0   3  13 14797.1 1263.74  16
   0   3  13 14108.5 1333.81  20
   0   3  13 15535.8 1274.54  25
   0   3  13 16489.4 1404.03  26
   0   3  13 16104.0 1309.59  29
   0   3  14 8968.28 964.348  16
   0   3  14 6475.73 918.704  20
   0   3  14 9638.10 978.352  25
   0   3  14 8914.02 922.880  22
   0   3  14 10434.1 1099.15  26
   0   3  14 10317.9 1025.45  29
   0   3  15 2991.98 622.279  20
   0   3  15 4995.19 876.633  21
   0   3  15 4224.02 666.521  16
   0   3  15 4913.08 707.124  29
   0   3  15 5360.53 717.157  25
   0   3  15 5303.59 799.203  26
   0   3  16 16744.4 1277.20  37
   0   3  16 20569.0 1744.48  21
   0   3  16 19191.4 1439.99  16
   0   3  16 19063.7 1561.17  26
   0   3  16 21023.5 1487.22  25
   0   3  17 1778.29 363.109  37
   0   3  17 1700.23 506.291  21
   0   3  17 1497.28 384.958  16
   0   3  17 1560.78 391.317  25
   0   3  17 1993.13 488.145  26
   0   3  18 21942.3 1471.15  37
   0   3  18 24226.3 1854.42  21
   0   3  18 24913.8 1772.73  26
   0   3  18 25758.0 1627.85  25
   0   3  19 2546.23 391.325  37
   0   3  19 2856.22 550.926  21
   0   3  19 3107.94 465.881  25
   0   3  20 30909.4 1848.02  21
   0   3  20 34296.8 1720.67  25
   0   3  21 334.326 407.601  25
   0   3  21 14.0373 63.6633  37
   0  -4  23 5769.59 592.915  34
   0  -4  22 26605.1 1665.34  22
   0  -4  22 27933.1 1760.91  31
   0  -4  22 23683.7 1596.40  34
   0  -4  21 2986.67 524.760  22
   0  -4  21 2001.07 435.299  34
   0  -4  21 2301.63 513.107  31
   0  -4  20 17147.1 1759.67  20
   0  -4  20 21619.8 1731.78  31
   0  -4  20 21359.9 1599.05  34
   0  -4  20 21316.8 1599.60  22
   0  -4  20 21559.4 1537.75  23
   0  -4  19 24926.5 1637.90  37
   0  -4  19 22372.4 2017.95  20
   0  -4  19 26198.3 1881.19  34
   0  -4  19 28090.6 2072.32  31
   0  -4  19 27092.7 1881.79  22
   0  -4  19 25850.1 1819.48  23
   0  -4  18 674.942 165.041  35
   0  -4  18 671.778 274.638  37
   0  -4  18 1065.01 455.770  20
   0  -4  18 1202.69 396.340  30
   0  -4  18 849.133 415.428  31
   0  -4  18 286.396 254.030  23
   0  -4  18 541.207 301.912  22
   0  -4  17 14983.0 867.406  35
   0  -4  17 15606.4 1200.75  37
   0  -4  17 15094.2 1566.42  20
   0  -4  17 13755.0 1893.90  21
   0  -4  17 14320.9 1471.56  31
   0  -4  17 13786.0 1400.28  30
   0  -4  17 13496.0 1293.56  22
   0  -4  17 13179.4 1293.52  23
   0  -4  16 14523.4 812.638  35
   0  -4  16 12312.1 1055.45  37
   0  -4  16 11829.2 1709.39  21
   0  -4  16 11533.3 1356.47  20
   0  -4  16 12457.1 1115.01  27
   0  -4  16 12301.5 1326.45  30
   0  -4  16 10412.6 1150.46  23
   0  -4  16 12282.4 1210.04  22
   0  -4  15 8084.62 538.100  35
   0  -4  15 6800.46 738.925  37
   0  -4  15 6274.49 954.887  20
   0  -4  15 7385.42 1385.36  21
   0  -4  15 6715.22 1102.47  19
   0  -4  15 7049.06 810.701  27
   0  -4  15 6001.46 851.769  23
   0  -4  15 6181.29 821.469  22
   0  -4  14 23219.5 1522.21  37
   0  -4  14 26844.0 1209.95  35
   0  -4  14 23582.4 1896.70  20
   0  -4  14 24312.2 2078.50  21
   0  -4  14 24533.8 2141.52  19
   0  -4  14 20704.3 1765.58  31
   0  -4  14 24669.0 1716.80  22
   0  -4  14 19000.4 1629.21  23
   0  -4  14 22901.5 1617.40  27
   0  -4  13 16406.7 807.206  35
   0  -4  13 14557.5 1078.01  37
   0  -4  13 13948.0 1520.28  21
   0  -4  13 14895.6 1396.49  20
   0  -4  13 14444.3 1571.71  19
   0  -4  13 14175.6 1131.06  33
   0  -4  13 10584.7 1176.29  31
   0  -4  13 13745.8 1190.84  22
   0  -4  13 12960.7 1223.19  23
   0  -4  13 13436.8 1152.91  27
   0  -4  12 52408.5 2087.99  35
   0  -4  12 48257.8 2439.29  37
   0  -4  12 54307.5 3283.60  19
   0  -4  12 46682.7 2895.57  21
   0  -4  12 48679.4 2845.33  20
   0  -4  12 49234.2 2619.57  22
   0  -4  12 44658.1 2745.35  31
   0  -4  12 46517.2 2501.06  33
   0  -4  11 30881.6 1821.83  33
   0  -4  11 31430.8 1757.36  37
   0  -4  11 34163.5 1458.03  35
   0  -4  10 8835.02 774.026  33
   0   4 -10 10057.7 461.393  38
   0  -4  10 9887.03 534.729  35
   0  -4   9 59086.5 2946.42  33
   0   4  -9 66402.0 2553.53  38
   0  -4   9 65072.4 2620.59  35
   0  -4   9 62299.4 2646.57  18
   0   4  -8 1459.83 124.728  38
   0  -4   8 1728.16 162.955  35
   0  -4   8 1707.42 189.642  18
   0   4  -7 296657. 11363.7  38
   0  -4   7 302712. 11401.9  35
   0  -4   7 284137. 11463.8  18
   0   4  -6 553.075 80.8632  38
   0  -4   6 522.292 119.029  18
   0   4  -5 212281. 8233.36  38
   0  -4   5 217009. 8334.42  18
   0   4  -4 2911.51 184.964  38
   0  -4   4 2944.22 248.067  18
   0   4  -3 50149.4 1999.14  38
   0   4  -2 10255.0 453.541  38
   0  -4   2 8526.12 510.566  18
   0   4  -1 123010. 4856.47  38
   0  -4   1 130523. 4964.19  18
   0  -4   0 41022.5 1740.49  18
   0   4   1 19106.5 810.971  38
   0  -4  -1 18739.0 898.221  18
   0   4   2 2630.34 176.733  38
   0  -4  -2 2995.71 252.750  18
   0   4   3 47152.4 1813.50  38
   0  -4  -3 48212.8 1933.10  18
   0   4   4 775.328 87.2813  38
   0  -4  -4 773.204 142.591  18
   0   4   4 514.623 122.567  15
   0   4   5 36013.4 1455.87  38
   0   4   5 33019.9 1543.34  15
   0   4   6 13.5509 31.1144  38
   0   4   6 71.0513 74.8041  15
   0   4   7 13460.7 586.952  38
   0   4   7 12606.8 842.297  36
   0   4   7 13189.0 675.691  15
   0   4   8 1212.53 287.963  29
   0   4   8 1021.33 223.077  36
   0   4   8 1330.53 159.261  15
   0   4   9 22330.9 1336.24  36
   0   4   9 22537.6 1045.85  15
   0   4   9 25435.6 1580.32  29
   0   4   9 24956.4 1608.40  26
   0   4   9 21909.8 1517.12  25
   0   4  10 25.3835 77.7516  36
   0   4  10 167.891 74.6672  15
   0   4  10 280.238 189.684  26
   0   4  10 71.5313 169.473  25
   0   4  10 369.530 208.383  29
   0   4  11 8852.87 804.292  36
   0   4  11 11102.3 1038.46  29
   0   4  11 10288.5 997.820  25
   0   4  11 11803.6 1095.54  26
   0   4  12 744.945 225.167  36
   0   4  12 751.918 309.833  16
   0   4  12 1064.85 340.919  29
   0   4  12 697.014 319.097  26
   0   4  12 759.993 301.063  25
   0   4  13 2985.51 453.666  36
   0   4  13 2644.46 535.235  16
   0   4  13 2248.11 465.498  25
   0   4  13 2971.85 585.958  26
   0   4  14 3868.66 640.109  16
   0   4  14 4925.19 675.937  25
   0   4  14 4022.69 688.194  26
   0   4  15 17206.4 1276.48  37
   0   4  15 19441.4 1510.30  16
   0   4  15 21428.9 1790.95  21
   0   4  15 20596.7 1479.79  25
   0   4  15 18900.3 1549.48  26
   0   4  16 211.244 160.312  37
   0   4  16 359.674 238.524  16
   0   4  16 337.416 344.112  21
   0   4  16 558.982 318.718  26
   0   4  16 445.112 238.226  25
   0   4  17 26683.4 1649.10  37
   0   4  17 29186.0 1825.75  16
   0   4  17 30100.5 2109.22  21
   0   4  17 33267.3 2062.61  26
   0   4  17 31472.2 1840.36  25
   0   4  18 91.7992 113.227  37
   0   4  18 381.001 306.326  21
   0   4  18 84.2951 171.875  25
   0   4  19 52366.9 2355.54  25
   0   4  19 47593.1 2522.98  21
   0   4  20 915.275 346.845  25
   0  -5  23 297.774 140.162  34
   0  -5  23 516.444 212.299  31
   0  -5  22 19117.1 1280.41  22
   0  -5  22 17249.7 1234.21  34
   0  -5  22 20776.6 1452.46  31
   0  -5  21 457.355 244.806  23
   0  -5  21 68.4529 198.732  22
   0  -5  21 307.620 255.075  31
   0  -5  21 177.138 181.449  34
   0  -5  20 40387.9 2375.36  22
   0  -5  20 45377.1 2457.70  23
   0  -5  20 38023.6 2358.69  34
   0  -5  19 6798.90 863.353  23
   0  -5  19 7068.15 862.985  22
   0  -5  18 15552.0 1644.68  20
   0  -5  18 18640.4 1594.75  30
   0  -5  18 18666.6 1526.87  23
   0  -5  18 18177.8 1471.56  22
   0  -5  17 4586.98 408.729  35
   0  -5  17 3708.11 776.030  20
   0  -5  17 3045.84 682.867  31
   0  -5  17 4629.57 788.755  30
   0  -5  17 4750.00 716.053  22
   0  -5  17 4013.85 706.522  23
   0  -5  16 10205.4 650.305  35
   0  -5  16 9124.11 1175.08  20
   0  -5  16 8069.14 1068.22  31
   0  -5  16 8712.06 1039.94  23
   0  -5  16 8798.70 987.734  22
   0  -5  15 6036.21 457.109  35
   0  -5  15 5675.73 894.120  20
   0  -5  15 5751.82 899.431  31
   0  -5  15 5594.32 755.897  22
   0  -5  15 4141.86 717.389  23
   0  -5  14 10617.8 630.601  35
   0  -5  14 11914.4 1504.18  19
   0  -5  14 8735.13 1110.22  20
   0  -5  14 7871.11 1038.23  31
   0  -5  14 8620.41 883.058  33
   0  -5  14 9025.73 979.790  22
   0  -5  13 481.304 121.423  35
   0  -5  13 157.260 227.100  20
   0  -5  13 641.635 395.662  19
   0  -5  13 157.547 238.576  31
   0  -5  13 315.036 185.909  33
   0  -5  13 387.109 212.195  22
   0  -5  12 1793.36 209.278  35
   0  -5  12 1542.88 422.315  20
   0  -5  12 2290.29 646.970  19
   0  -5  12 1415.69 355.354  22
   0  -5  12 1626.03 451.912  31
   0  -5  12 2194.76 400.386  33
   0  -5  11 19870.1 1321.26  33
   0  -5  11 20556.0 957.204  35
   0  -5  10 9610.21 820.307  33
   0  -5  10 10675.8 562.972  35
   0   5 -10 10533.4 500.108  38
   0  -5  10 9970.50 1232.05  19
   0  -5   9 75671.2 3709.31  33
   0  -5   9 82399.0 3342.27  35
   0   5  -9 85434.6 3288.14  38
   0  -5   9 82365.2 3421.21  18
   0  -5   8 4405.03 483.337  33
   0   5  -8 4143.74 258.229  38
   0  -5   8 4432.37 292.682  35
   0  -5   8 3813.37 336.660  18
   0   5  -7 19082.5 833.455  38
   0  -5   7 18192.0 944.717  18
   0   5  -6 825.017 104.854  38
   0  -5   6 581.051 147.609  18
   0   5  -5 15128.8 690.921  38
   0  -5   5 15180.2 804.407  18
   0   5  -4 33094.2 1375.58  38
   0   5  -3 34600.2 1433.73  38
   0   5  -2 141702. 5459.86  38
   0  -5   2 137201. 5584.30  18
   0  -5   1 8272.96 521.238  18
   0   5   0 124690. 4931.64  38
   0  -5   0 130174. 5077.26  18
   0   5   1 879.738 108.713  38
   0  -5  -1 1136.06 185.449  18
   0   5   2 195106. 7590.97  38
   0  -5  -2 198465. 7746.40  18
   0   5   3 3030.51 208.001  38
   0  -5  -3 3108.58 298.945  18
   0   5   4 54062.0 2154.52  38
   0  -5  -4 59164.8 2342.73  18
   0   5   5 10376.0 500.667  38
   0  -5  -5 11459.9 650.017  18
   0   5   5 9467.43 586.892  15
   0   5   6 60760.4 2392.03  38
   0   5   6 57741.2 2511.44  15
   0   5   7 9207.42 451.125  38
   0   5   7 9114.43 699.311  36
   0   5   7 9399.16 555.232  15
   0   5   7 9622.59 859.841  25
   0   5   8 8834.05 725.555  36
   0   5   8 9204.75 547.942  15
   0   5   8 10705.9 947.035  26
   0   5   8 9874.45 899.727  25
   0   5   9 2027.67 322.423  36
   0   5   9 1143.03 167.702  15
   0   5   9 1350.50 357.638  26
   0   5   9 1518.26 358.478  25
   0   5  10 390.968 151.677  36
   0   5  10 247.538 90.3214  15
   0   5  10 582.849 261.139  26
   0   5  10 369.616 220.620  25
   0   5  11 829.587 235.825  36
   0   5  11 990.885 305.964  25
   0   5  11 1147.49 368.822  26
   0   5  12 113.669 110.006  36
   0   5  12 411.681 257.925  26
   0   5  12 39.0284 160.167  25
   0   5  13 3694.57 658.846  16
   0   5  13 4330.48 673.491  26
   0   5  13 3531.83 569.358  25
   0   5  14 8675.47 791.977  37
   0   5  14 9990.48 1039.18  16
   0   5  14 9845.33 942.278  25
   0   5  14 10287.2 1042.16  26
   0   5  15 10555.7 878.013  37
   0   5  15 13953.7 1352.98  21
   0   5  15 12731.8 1139.85  16
   0   5  15 13444.5 1078.36  25
   0   5  15 12765.5 1203.92  26
   0   5  16 55009.7 3069.69  21
   0   5  16 54591.8 2805.32  16
   0   5  16 57883.6 2710.13  25
   0   5  17 1564.94 255.669  37
   0   5  17 1929.42 347.250  25
   0   5  17 1681.98 366.886  16
   0   5  17 2060.65 457.023  21
   0   5  18 11981.6 833.544  25
   0   5  18 11215.0 983.854  21
   0   5  19 471.085 309.574  25
   0  -6  22 2546.75 380.995  34
   0  -6  21 33690.1 1878.51  22
   0  -6  21 30086.1 1873.05  34
   0  -6  20 9706.36 903.597  22
   0  -6  20 11230.9 1020.10  23
   0  -6  20 8906.53 894.823  34
   0  -6  20 10277.4 1095.71  31
   0  -6  19 22326.5 1616.37  23
   0  -6  19 19443.8 1462.16  22
   0  -6  19 22170.0 1735.73  31
   0  -6  18 8572.52 1000.93  23
   0  -6  18 8426.00 912.191  22
   0  -6  18 9984.40 1091.10  30
   0  -6  18 8274.40 1063.89  31
   0  -6  17 34519.0 2117.73  22
   0  -6  17 32940.2 2263.62  23
   0  -6  17 33799.9 2402.78  31
   0  -6  16 1719.80 233.695  35
   0  -6  16 1569.60 407.737  22
   0  -6  16 953.111 450.112  31
   0  -6  15 9635.02 609.387  35
   0  -6  15 8340.94 923.745  22
   0  -6  15 7439.02 1040.28  31
   0  -6  14 611.294 147.620  35
   0  -6  14 348.694 212.548  22
   0  -6  14 578.145 344.977  31
   0  -6  14 227.896 165.064  33
   0  -6  13 4936.07 389.796  35
   0  -6  13 3748.45 671.771  23
   0  -6  13 5952.83 693.282  33
   0  -6  13 4922.90 807.822  31
   0  -6  12 17337.6 1528.26  31
   0  -6  12 17367.8 1275.70  33
   0  -6  12 16846.5 873.158  35
   0  -6  11 7179.12 736.041  33
   0  -6  11 5431.90 809.464  31
   0  -6  11 6653.35 435.035  35
   0   6 -11 6514.05 373.690  38
   0  -6  11 7387.66 1152.76  19
   0   6 -10 215.113 70.0987  38
   0  -6  10 135.897 74.6366  35
   0  -6  10 74.1397 286.801  19
   0  -6  10 116.865 98.0614  33
   0  -6  10 138.012 208.724  31
   0  -6  10 708.909 430.857   4
   0   6  -9 4066.92 278.524  38
   0  -6   9 4677.75 321.064  35
   0  -6   9 4193.95 385.185  18
   0  -6   9 4944.15 889.255  19
   0  -6   9 4071.61 508.689  33
   0  -6   9 3199.32 579.268  31
   0  -6   9 4865.13 918.329   4
   0   6  -8 236.726 74.0742  38
   0  -6   8 510.456 100.280  35
   0   6  -8 227.542 87.1529  15
   0  -6   8 228.685 119.682  18
   0  -6   8 67.2686 225.555  19
   0   6  -7 15080.1 708.938  38
   0  -6   7 14257.4 847.620  18
   0  -6   7 15181.9 1561.93  19
   0   6  -6 9810.94 516.015  38
   0  -6   6 10631.3 660.652  18
   0   6  -5 437.991 89.4557  38
   0  -6   5 264.537 123.508  18
   0   6  -4 27520.4 1193.48  38
   0   6  -3 4576.59 293.187  38
   0  -6   3 4486.76 392.125  18
   0   6  -2 17995.5 822.948  38
   0  -6   2 17895.7 966.527  18
   0  -6   1 44436.0 2001.20  18
   0   6   0 3650.50 255.018  38
   0   6   0 3631.59 328.315  15
   0  -6   0 3559.38 352.052  18
   0   6   1 53308.7 2195.16  38
   0   6   1 54200.3 2341.42  15
   0  -6  -1 54064.2 2377.16  18
   0   6   2 83134.3 4144.00  10
   0   6   2 86569.9 3476.76  38
   0  -6  -2 91218.3 3693.48  18
   0   6   3 67061.1 2691.56  38
   0  -6  -3 68786.8 2903.79  18
   0   6   3 61612.8 3337.98  10
   0  -6  -3 65338.0 3457.33   3
   0   6   4 29148.5 1244.63  38
   0   6   4 27280.0 1361.17  15
   0  -6  -4 31304.5 1458.72  18
   0   6   4 27099.0 1829.13  10
   0  -6  -4 29449.6 1939.21   3
   0   6   5 83041.5 3372.71  38
   0   6   5 83389.1 3517.87  15
   0   6   5 80055.7 4093.91  10
   0  -6  -5 90065.2 4270.10   3
   0   6   6 53817.8 3024.35  10
   0   6   6 56806.6 2334.01  38
   0   6   6 56749.3 2470.18  15
   0   6   7 29301.0 1929.04  10
   0   6   7 29928.9 1433.95  15
   0  -6  -8 6842.70 824.239   8
   0   6   8 6428.90 694.169  25
   0   6   8 5202.37 406.981  15
   0  -6  -9 15633.0 1268.24   8
   0   6   9 14128.6 1116.87  25
   0   6   9 12238.0 713.334  15
   0   6  10 17131.1 1291.33  26
   0   6  10 17270.9 1243.24  25
   0   6  10 13450.6 766.155  15
   0   6  11 4165.92 585.531  25
   0   6  11 4500.60 662.370  26
   0   6  11 3817.46 654.706  16
   0   6  12 19415.6 1385.81  25
   0   6  12 21521.3 1550.25  26
   0   6  13 3405.39 500.412  25
   0   6  14 7727.43 731.728  25
   0   6  15 2459.33 378.037  25
   0   6  15 2189.71 426.778  16
   0   6  15 1830.74 460.514  21
   0   6  16 873.548 210.670  25
   0   6  16 1407.62 319.635  16
   0   6  16 841.095 302.349  21
   0   6  17-178.373 230.542  25
   0   6  17 109.770 159.198  21
   0  -7  22 6874.12 646.367  31
   0  -7  21 13805.6 1067.80  31
   0  -7  21 14822.8 1011.91  23
   0  -7  20 7746.14 872.434  31
   0  -7  20 8243.84 766.872  34
   0  -7  20 9078.93 853.113  23
   0  -7  19 23914.9 1717.33  31
   0  -7  19 21041.5 1557.18  23
   0  -7  18 10216.2 1129.21  31
   0  -7  17 48573.1 2942.26  31
   0  -7  16 506.812 344.756  31
   0  -7  16 388.593 304.825  23
   0  -7  15 96748.0 4899.47  31
   0  -7  15 83157.8 4623.91  23
   0  -7  15 97074.7 3911.81  35
   0  -7  14 2018.55 414.420  33
   0  -7  14 1143.98 433.653  31
   0  -7  14 1591.95 449.186  23
   0  -7  14 1909.36 235.377  35
   0  -7  13 58311.5 3377.80  31
   0  -7  13 57484.1 3003.77  33
   0  -7  13 60743.6 2478.75  35
   0  -7  12 861.855 154.192  35
   0  -7  12 1078.39 522.473   4
   0  -7  12 1128.80 410.677  31
   0  -7  12 918.062 279.503  33
   0   7 -11 3777.04 271.395  38
   0  -7  11 3399.66 297.083  35
   0  -7  11 3175.93 838.811   4
   0  -7  11 3223.66 628.795  31
   0  -7  11 3569.82 517.857  33
   0   7 -10 817.230 124.781  38
   0  -7  10 904.273 144.055  35
   0  -7  10 1040.04 534.066   4
   0  -7  10 1042.80 275.271  33
   0  -7  10 772.281 311.327  31
   0   7  -9 1642.93 174.474  38
   0  -7   9 1724.80 190.689  35
   0  -7   9 1310.14 370.139  31
   0  -7   9 1224.05 291.723  33
   0  -7   9 667.217 491.174   4
   0  -7   8 842.811 133.614  35
   0   7  -8 898.001 130.845  38
   0  -7   8 837.450 207.152  18
   0   7  -8 737.417 140.890  15
   0   7  -8 594.830 236.408  10
   0   7  -7 2553.59 227.608  38
   0  -7   7 2828.66 237.950  35
   0  -7   7 3143.74 359.253  18
   0   7  -7 2730.90 266.333  15
   0   7  -7 2508.52 460.626  10
   0  -7   7 2051.34 451.748   8
   0   7  -6 6958.78 426.815  38
   0  -7   6 7855.34 596.891  18
   0   7  -6 7357.97 491.913  15
   0  -7   6 7424.47 837.715   8
   0   7  -6 6779.62 773.314  10
   0   7  -5 365.696 89.3879  38
   0   7  -5 124.944 92.3666  15
   0  -7   5 222.575 146.503  18
   0  -7   5 135.649 185.718   7
   0   7  -5 148.923 203.847  10
   0   7  -4 335.482 96.7021  38
   0   7  -4 624.885 147.560  15
   0   7  -4 303.535 214.378  10
   0  -7   4 363.130 256.297   7
   0  -7   4 167.871 190.853   8
   0   7  -3 4631.52 326.782  38
   0   7  -3 6176.31 440.315  15
   0  -7   3 4601.74 444.654  18
   0  -7   3 5723.26 778.987   7
   0  -7   3 5722.11 740.712   8
   0   7  -3 5221.75 684.130  10
   0  -7   3 4685.63 721.273   3
   0   7  -2 11635.0 657.963  15
   0  -7   2 9165.73 683.065  18
   0  -7   2 9400.25 997.471   8
   0  -7   2 11679.5 1137.16   7
   0   7  -2 10108.4 992.603  10
   0  -7   2 7855.14 977.884   3
   0  -7   1 30724.5 1608.87  18
   0  -7   1 28425.6 2094.38   3
   0   7  -1 31236.8 2022.61  10
   0   7   0 46674.9 1949.87  38
   0   7   0 50053.3 2093.66  15
   0  -7   0 43699.5 2143.22  18
   0  -7   0 40984.7 2694.81   3
   0  -7   0 45505.1 2647.22   8
   0   7   1 60609.8 2520.77  38
   0   7   1 65282.6 2666.48  15
   0  -7  -1 59942.5 2744.19  18
   0  -7  -1 54635.8 3312.77   3
   0   7   1 59740.4 3280.23  10
   0  -7  -1 66343.4 3363.94   8
   0   7   2 21566.7 1015.48  38
   0  -7  -2 22916.7 1241.77  18
   0  -7  -2 25449.3 1749.98   8
   0   7   2 23054.1 1693.19  10
   0  -7  -2 21897.3 1721.15   3
   0   7   3 67350.8 2793.00  38
   0   7   3 70861.8 3662.15  10
   0  -7  -3 76924.4 3745.32   8
   0   7   4 24980.2 1119.48  38
   0   7   4 23873.2 1241.87  15
   0   7   4 24689.7 1806.98  10
   0   7   5 124864. 5023.44  38
   0   7   5 126732. 5182.20  15
   0   7   5 121533. 5912.49  10
   0   7   6 11690.0 595.618  38
   0   7   6 10148.6 1080.64  10
   0   7   6 12123.6 717.912  15
   0  -7  -7 27456.3 1870.67   8
   0   7   7 22443.3 1157.68  15
   0  -7  -8 1047.89 376.596   8
   0   7   8 1146.91 184.302  15
   0  -7  -9 28836.1 1960.64   8
   0   7  10 260.734 222.546  16
   0   7  11 18635.6 1460.68  16
   0   7  12 574.264 252.002  16
   0   7  13 8468.84 855.140  16
   0   7  14 1715.61 428.185  21
   0   7  15 7888.95 794.874  21
   0  -7 -16 246.051 153.345   7
   0   7  16 366.410 177.189  21
   0  -8  21 3610.25 399.854  23
   0  -8  21 2964.40 401.374  31
   0  -8  20 1255.45 241.154  34
   0  -8  20 1812.01 350.510  31
   0  -8  19 207.906 183.672  31
   0  -8  18 14121.9 1174.61  23
   0  -8  18 14862.2 1267.07  31
   0  -8  17 1490.94 398.554  23
   0  -8  17 1906.05 469.851  31
   0  -8  16 27231.4 1929.22  23
   0  -8  16 29699.9 2017.58  31
   0  -8  15 285.280 268.205  23
   0  -8  15 200.737 227.761  31
   0  -8  14 66383.1 3676.54  23
   0  -8  14 67884.4 3409.14  33
   0  -8  14 74805.8 3842.51  31
   0  -8  13 254.530 303.920  23
   0  -8  13 558.340 229.515  33
   0  -8  13 510.849 320.583  31
   0  -8  12 46270.0 2723.48  31
   0  -8  12 45568.2 2421.16  33
   0  -8  11 3933.62 675.519  31
   0  -8  11 3858.34 548.168  33
   0  -8  11 4158.06 1017.04   4
   0   8 -11 3866.40 297.600  38
   0  -8  11 4486.13 338.919  35
   0  -8  10 31097.3 2104.91  31
   0  -8  10 32434.2 1892.21  33
   0  -8  10 28385.8 2799.37   4
   0  -8  10 33655.4 1443.31  35
   0   8 -10 30265.4 1393.67  38
   0  -8   9 13414.6 1838.15   4
   0  -8   9 13315.9 1053.63  33
   0  -8   9 17679.2 1912.79   9
   0   8  -9 13550.3 1166.95  10
   0  -8   9 13088.2 704.632  35
   0   8  -9 13329.7 696.837  38
   0  -8   8 20936.1 2312.12   4
   0   8  -8 16242.5 840.839  38
   0  -8   8 18066.8 863.355  35
   0  -8   8 17175.3 1238.52  33
   0   8  -8 17345.6 1379.50  10
   0  -8   7 8770.88 490.006  35
   0   8  -7 7533.80 473.329  38
   0   8  -7 7602.35 513.084  15
   0  -8   7 8789.09 1492.41   4
   0   8  -7 7702.22 889.739  10
   0  -8   7 6939.10 899.328   8
   0   8  -6 4741.80 340.072  38
   0   8  -6 4332.92 370.596  15
   0  -8   6 4511.45 483.522  18
   0  -8   6 3334.79 624.006   8
   0   8  -5 69.4850 68.3778  38
   0   8  -5 530.334 133.932  15
   0   8  -5 223.094 228.322  10
   0  -8   5-49.8499 180.398   8
   0  -8   5-51.8315 245.548   7
   0   8  -4 3052.17 266.858  38
   0   8  -4 3307.47 326.370  15
   0  -8   4 2942.05 608.793   8
   0   8  -4 3676.21 626.142  10
   0  -8   4 3217.13 619.573   7
   0   8  -3 18032.7 930.573  38
   0   8  -3 22302.8 1073.32  15
   0  -8   3 19156.5 1155.25  18
   0  -8   3 20489.2 1685.85   7
   0   8  -3 20768.9 1585.97  10
   0  -8   3 20304.9 1639.94   8
   0   8  -2 10575.5 654.513  15
   0  -8   2 9353.05 731.047  18
   0   8  -2 9397.91 1033.12  10
   0  -8   2 9582.12 1124.41   7
   0  -8   2 9572.33 1081.60   8
   0   8  -1 28528.9 1297.04  38
   0  -8   1 27781.6 1528.76  18
   0   8  -1 28326.6 1401.46  15
   0   8  -1 27556.7 1978.75  10
   0   8   0 10500.1 586.875  38
   0   8   0 10434.7 677.535  15
   0  -8   0 12520.7 1288.12   7
   0  -8   0 9899.19 1099.68   8
   0   8   1 2309.90 225.574  38
   0   8   1 2115.14 269.321  15
   0  -8  -1 1828.81 502.158   8
   0   8   1 2560.01 564.308  10
   0   8   2 84768.8 3465.54  38
   0   8   2 86431.9 4436.62  10
   0  -8  -2 90622.1 4499.81   8
   0   8   3 5590.71 373.324  38
   0  -8  -3 5466.20 827.370   8
   0   8   3 5841.60 828.508  10
   0   8   4 65986.5 2769.25  38
   0   8   4 69036.2 2929.44  15
   0   8   4 70251.7 3721.21  10
   0  -8  -4 76354.3 3856.25   8
   0   8   5 14629.4 721.769  38
   0  -8  -5 17219.1 1484.83   8
   0   8   5 13441.5 1298.98  10
   0   8   5 14561.2 843.417  15
   0  -8  -6 35345.3 2273.53   8
   0   8   6 30065.3 1465.51  15
   0  -8  -7 4944.94 761.256   8
   0  -8  -8 42154.9 2550.53   8
   0   8   9 5017.65 687.125  16
   0   8  10 20616.4 1472.40  16
   0   8  11 1074.99 314.471  16
   0   8  12 14278.2 1063.47  16
   0  -8 -13 104.250 171.330   7
   0   8  13 62.4657 176.093  21
   0   8  13 23.2319 123.046  16
   0  -8 -14 4507.39 530.792   7
   0   8  14 4145.66 429.455  16
   0   8  14 3684.70 474.321  21
   0  -9  19 2428.21 358.833  23
   0  -9  19 2024.69 322.490  31
   0  -9  18 187.214 182.868  23
   0  -9  18 25.9858 137.641  31
   0  -9  17 3284.75 504.138  23
   0  -9  17 2692.25 456.797  31
   0  -9  16 72.5375 164.595  23
   0  -9  16 307.172 208.797  31
   0  -9  15 8550.13 938.626  23
   0  -9  15 9535.35 935.685  31
   0  -9  14 1643.41 440.006  23
   0  -9  14 1750.69 421.176  31
   0  -9  14 1972.10 360.570  33
   0  -9  13 1860.58 471.439  23
   0  -9  13 2704.36 516.593  31
   0  -9  13 2016.25 374.703  33
   0  -9  12 2916.91 596.948  23
   0  -9  12 3798.27 519.783  33
   0  -9  11 30956.5 1802.31  33
   0  -9  11 26107.8 2654.50   4
   0  -9  10 3381.50 487.232  33
   0  -9  10 2433.20 809.092   4
   0  -9   9 17263.7 2140.89   4
   0  -9   9 17461.5 1205.49  33
   0  -9   9 19086.4 2053.04   9
   0   9  -9 16638.2 1334.59  10
   0   9  -9 15094.1 795.231  38
   0  -9   8 13759.4 1945.42   4
   0  -9   8 15654.7 1129.49  33
   0   9  -8 14285.8 758.697  38
   0   9  -8 15721.1 1316.40  10
   0   9  -7 23646.6 1133.35  38
   0   9  -7 25787.9 1819.55  10
   0  -9   7 26159.2 2719.46   4
   0   9  -6 3825.29 317.726  38
   0   9  -6 3958.55 349.284  15
   0   9  -6 4757.36 731.137  10
   0  -9   6 3687.69 1060.34   4
   0   9  -5 41336.0 2492.16  10
   0  -9   5 38094.3 2489.49   7
   0  -9   5 32078.0 2386.87   8
   0   9  -5 37521.9 1666.26  38
   0   9  -5 38728.2 1733.74  15
   0   9  -4 2107.73 227.629  38
   0   9  -4 1872.24 249.955  15
   0  -9   4 1529.84 741.187   4
   0  -9   4 1629.06 485.511   8
   0  -9   4 2026.05 529.456   7
   0   9  -4 2194.01 529.056  10
   0  -9   3 14407.4 1431.37   8
   0   9  -3 14602.7 1359.36  10
   0  -9   3 16517.1 1490.53   7
   0   9  -3 14645.9 839.816  15
   0   9  -2 2726.62 583.537  10
   0  -9   2 2720.47 605.001   7
   0   9  -2 2568.47 252.792  38
   0   9  -2 2289.61 282.601  15
   0  -9   1 26990.5 2005.51   7
   0   9  -1 23061.7 1797.48  10
   0   9  -1 23861.5 1120.62  38
   0   9  -1 22850.4 1188.57  15
   0  -9   0 3303.29 673.965   7
   0  -9   0 2386.18 570.767   8
   0   9   0 2433.82 243.381  38
   0   9   0 2512.46 289.531  15
   0  -9  -1 20167.4 1703.95   8
   0   9   1 18558.3 1662.03  10
   0  -9  -1 23659.4 1877.88   7
   0   9   1 20845.6 986.376  38
   0   9   1 19809.8 1066.13  15
   0  -9  -2 19986.0 1723.36   8
   0  -9  -2 22642.1 1878.08   7
   0   9   2 22457.8 1782.26  10
   0  -9  -2 23890.7 2515.73   4
   0  -9  -3 434.299 332.326   8
   0  -9  -3 741.059 430.841   7
   0  -9  -3 106.135 384.270   4
   0  -9  -4 12011.0 1315.51   7
   0  -9  -4 9641.93 1115.32   8
   0  -9  -4 10555.8 1590.10   4
   0  -9  -5 10766.0 1160.20   8
   0  -9  -5 9054.26 1430.52   4
   0  -9  -6 4329.69 707.392   8
   0   9   6 4524.54 629.876  16
   0  -9  -7 25462.9 1868.22   7
   0   9   7 17731.7 1349.94  16
   0   9   8 10988.4 949.304  16
   0   9   9 19028.5 1275.73  16
   0   9  10 4878.61 547.703  16
   0  -9 -11 19727.9 1375.00   7
   0   9  11 20141.0 1189.49  16
   0 -10  17 20.4993 108.561  23
   0 -10  16 5739.03 606.741  23
   0 -10  15 457.104 214.668  23
   0 -10  14 18847.8 1340.24  23
   0 -10  13 1325.84 339.869  23
   0 -10  13 980.192 230.568  33
   0  10 -12 4027.13 409.369  40
   0 -10  12 4907.43 514.881  33
   0 -10  12 5084.06 671.796  23
   0 -10  11 4820.43 529.405  33
   0 -10  11 4824.53 663.601  23
   0 -10  10 705.800 211.153  33
   0 -10  10 713.141 307.475  23
   0 -10  10 298.117 471.359   4
   0 -10   9 9757.90 1588.10   4
   0 -10   9 13429.8 965.283  33
   0 -10   8 2227.72 870.126   4
   0 -10   8 3439.04 449.469  33
   0 -10   7 5648.20 1274.25   4
   0 -10   7 7929.61 1368.58   9
   0 -10   7 8042.27 719.514  33
   0 -10   6 18959.1 1235.19  33
   0  10  -5 24939.0 1807.26  10
   0  10  -4 23213.7 1705.07  10
   0 -10   4 18203.3 2266.06   4
   0  10  -3 9437.89 1046.87  10
   0 -10   3 8413.80 1496.07   4
   0  10  -2 19797.7 1608.94  10
   0 -10   2 21759.9 2386.12   4
   0 -10   1 17299.5 2122.88   4
   0 -10   0 4782.74 755.014   7
   0 -10   0 3414.23 657.393   8
   0 -10   0 4534.83 1071.09   4
   0 -10  -1 9703.14 1083.36   7
   0 -10  -1 8531.90 1032.49   8
   0 -10  -1 8469.38 1433.60   4
   0 -10  -2 3627.94 666.294   7
   0  10   2 2564.50 397.176  16
   0 -10  -3 5654.49 811.510   7
   0 -10  -3 3685.22 922.220   4
   0  10   3 3950.33 505.338  16
   0 -10  -4 3624.29 646.733   7
   0 -10  -4 2001.16 644.119   4
   0  10   4 3470.73 456.387  16
   0  10   5 19128.5 1245.68  16
   0 -10  -5 23057.9 1659.22   7
   0  10   6 930.348 231.722  16
   0 -10  -6 1039.18 352.364   7
   0 -10  -6 1124.01 491.226   9
   0  10   7 15463.9 995.532  16
   0 -10  -7 15141.4 1480.03   9
   0 -10  -7 16611.8 1291.63   7
   0  10   8 2175.99 304.473  16
   0 -10  -8 2404.02 443.562   7
   0  10   9 5793.20 468.353  16
   0 -10  -9 6682.82 664.451   7
   0 -11  14 5977.35 530.258  23
   0 -11  13 3105.10 395.664  23
   0 -11  12 13134.9 932.007  23
   0  11 -11 458.045 132.704  40
   0 -11  11 596.203 209.653  23
   0  11 -10 10142.1 692.973  40
   0 -11  10 11683.3 888.118  23
   0  11  -9 119.370 101.696  40
   0 -11   9 25.4422 139.195  23
   0 -11   9 162.198 332.689   4
   0 -11   8 32242.7 1537.66  33
   0 -11   8 27779.3 1661.16  23
   0 -11   8 25893.8 2451.35   4
   0 -11   7 258.875 111.288  33
   0 -11   7 392.173 192.875  23
   0 -11   7 639.689 499.948   4
   0 -11   6 15839.9 1763.56   9
   0 -11   6 15387.7 937.586  33
   0 -11   5 360.325 427.257   4
   0 -11   5 944.112 498.397   9
   0 -11   5 577.207 155.569  33
   0 -11   4 20624.8 2094.87   9
   0 -11   4 17640.3 1010.19  33
   0 -11   3 2949.81 821.576   4
   0 -11   3 4260.89 977.245   9
   0 -11   2 14613.9 1789.26   4
   0 -11   2 20148.6 2091.03   9
   0 -11   1 1580.10 625.730   4
   0  11   0 2662.22 348.378  40
   0 -11   0 4125.61 878.790   4
   0 -11   0 4730.27 953.217   9
   0 -11  -1 2194.40 657.054   4
   0 -11  -1 3334.26 806.782   9
   0 -11  -2 5180.36 888.540   4
   0 -11  -2 9240.01 1280.10   9
   0 -11  -3 661.759 311.288   4
   0 -11  -3 976.318 480.122   9
   0 -11  -4 28091.9 2133.26   9
   0 -11  -5 9059.79 1002.21   9
   0  12  -9 8095.53 617.232   1
   0  12  -8 377.504 112.528  40
   0  12  -7 7317.28 503.352  40
   0  12  -6 1741.56 234.623  40
   0  12  -5 12275.4 720.835  40
   0 -12   5 11898.0 1283.64   4
   0 -12   4 1207.96 419.496   4
   0 -12   4 724.664 355.631   9
   0  12  -3 6793.47 487.959  40
   0 -12   3 5443.42 849.455   4
   0 -12   3 7323.25 975.213   9
   0  12  -2 1225.34 186.406  40
   0 -12   2 1519.08 442.522   4
   1 -12   0 6988.49 941.522   9
  -1  12  -1 2985.07 298.150  40
  -1  12  -2 4041.56 370.915  40
  -1  12  -3 1199.95 209.752  40
   1 -12   3 1869.04 547.644   9
   1 -12   4 3081.03 673.736   9
  -1  12  -5 553.061 146.752  40
  -1  12  -6 408.770 128.438  40
  -1  12  -7 1734.86 234.155  40
  -1  12  -7 2139.02 337.805   1
  -1  12  -8 182.655 88.6015  40
  -1  12  -8 216.658 147.690   1
  -1  12  -9 3976.15 335.672  40
  -1  12  -9 5500.60 514.022   1
   1 -11  -6 71.8811 170.284   9
   1 -11  -6 132.627 149.597   7
   1 -11  -5 13345.8 1340.45   9
   1 -11  -5 13849.1 1090.20   7
   1 -11  -4 1849.77 567.863   9
   1 -11  -4 1278.57 351.489   7
   1 -11  -3 22411.7 1611.18   7
   1 -11  -3 25244.5 2185.18   9
   1 -11  -2 476.605 360.450   9
   1 -11  -2 204.791 336.776   4
   1 -11  -1 7369.61 1213.55   9
   1 -11  -1 3894.85 880.143   4
   1 -11   0 1416.52 594.772   9
   1 -11   0 1017.45 520.449   4
   1 -11   1 22499.1 2243.90   4
   1 -11   2 1030.42 588.273   4
   1 -11   3 30368.8 2663.04   9
   1 -11   3 19461.5 2198.23   4
   1 -11   4 867.703 511.176   9
   1 -11   4 484.008 459.191   4
   1 -11   5 22404.4 1285.16  33
   1 -11   5 24401.0 2336.54   9
   1 -11   6 3606.15 433.319  33
   1 -11   6 4040.59 929.382   9
   1 -11   7 8505.54 1404.34   4
   1 -11   7 10565.3 787.029  33
   1 -11   8 7191.82 1270.56   4
   1 -11   8 8443.44 688.964  33
   1 -11   9 1829.65 671.064   4
   1 -11   9 2427.16 378.467  23
   1 -11   9 3190.33 383.901  33
   1 -11  10 7972.83 703.637  23
   1 -11  10 8708.43 679.690  33
  -1  11 -11 1972.87 257.859  40
   1 -11  11 2141.52 310.819  33
   1 -11  11 2685.51 384.914  23
   1 -11  12 3037.95 352.673  33
   1 -11  12 2965.21 389.070  23
   1 -11  13 11904.1 826.381  23
   1 -11  14 2559.77 321.623  23
   1 -11  15 7964.36 560.773  23
  -1  10   9 1482.02 233.910  16
  -1  10   8 9433.77 695.994  16
  -1  10   7 3654.53 426.764  16
   1 -10  -7 3210.97 707.056   9
  -1  10   6 6306.12 619.876  16
   1 -10  -6 7988.31 949.725   7
   1 -10  -6 8397.07 1234.60   9
  -1  10   5 2200.39 358.366  16
   1 -10  -5 2738.07 593.607   7
   1 -10  -5 2489.24 754.702   9
  -1  10   4 993.142 256.736  16
   1 -10  -4 706.878 394.930   7
   1 -10  -4 883.144 453.939   4
   1 -10  -3 9851.58 1131.20   7
   1 -10  -3 5721.36 1153.48   4
   1 -10  -2 32801.1 2246.00   7
   1 -10  -2 22443.7 2441.42   4
   1 -10  -1 177.479 302.827   7
   1 -10  -1 426.134 437.113   4
   1 -10   0 53748.5 3175.11   7
   1 -10   0 44770.6 3744.25   4
   1 -10   1 5345.80 867.862   7
   1 -10   1 5217.29 1188.14   4
   1 -10   2 21616.9 1804.75   7
   1 -10   2 19271.5 2330.81   4
   1 -10   3 14211.9 1403.68   7
   1 -10   3 12343.9 1839.93   4
   1 -10   4 17715.3 2184.65   4
   1 -10   5 2779.72 859.385   9
   1 -10   6 30701.1 2915.16   9
   1 -10   7 212.555 356.126   9
   1 -10   7 385.132 181.495  33
   1 -10   7 218.673 186.787  23
   1 -10   7 239.627 518.182   4
   1 -10   8 6820.11 1259.30   9
   1 -10   8 4882.92 1154.32   4
   1 -10   8 4333.33 653.592  23
   1 -10   8 6556.77 671.538  33
   1 -10   9 334.525 432.363   4
   1 -10   9 792.222 302.369  23
   1 -10   9 1024.64 276.173  33
   1 -10  10 18174.9 2168.23   4
   1 -10  10 23520.2 1431.97  33
   1 -10  10 20937.0 1523.32  23
   1 -10  11 6141.67 640.043  33
   1 -10  11 5354.51 712.487  23
   1 -10  12 14995.6 1090.09  33
   1 -10  12 15819.9 1240.42  23
   1 -10  13 103.408 111.950  33
   1 -10  13 403.695 230.077  23
   1 -10  14 10287.3 829.562  33
   1 -10  14 12934.3 1023.14  23
   1 -10  15 721.959 241.700  23
   1 -10  16 24852.7 1459.73  23
   1 -10  17 2907.82 383.219  23
   1  -9 -12 3055.15 472.144   7
  -1   9  12 4343.47 435.986  16
  -1   9  12 3460.32 464.511  21
   1  -9 -11 12781.0 1135.21   7
  -1   9  11 15330.4 999.412  16
   1  -9 -10 389.083 295.643   7
  -1   9  10 130.170 151.188  16
   1  -9  -9 18620.3 1516.59   7
  -1   9   9 17275.5 1236.63  16
   1  -9  -8 636.327 383.739   7
   1  -9  -8 159.247 361.165   9
  -1   9   8 127.172 156.913  16
  -1   9   7 12687.8 1066.41  16
  -1   9   6 10422.3 966.365  16
  -1   9   5 27974.5 1791.50  16
   1  -9  -5 23608.9 2409.63   4
  -1   9   4 4248.49 597.782  16
   1  -9  -4 4414.98 1044.77   4
   1  -9  -4 3911.85 708.413   8
   1  -9  -4 5116.23 875.933   7
   1  -9  -3 51270.6 3989.79   4
   1  -9  -3 48197.1 3145.84   8
  -1   9   2 26.0456 65.0503  38
  -1   9   2 101.412 91.7396  15
   1  -9  -2-225.998 488.603   4
  -1   9   2 36.5576 158.084   1
   1  -9  -2 112.774 267.091   8
   1  -9  -2 328.810 311.495   7
  -1   9   1 6844.03 439.324  38
  -1   9   1 6502.62 490.702  15
   1  -9  -1 7615.81 1451.33   4
   1  -9  -1 5475.85 866.153   8
   1  -9  -1 8048.88 1077.89   7
  -1   9   0 3078.30 274.997  38
  -1   9   0 3020.17 309.938  15
   1  -9   0 3041.47 912.388   4
   1  -9   0 4216.29 806.815   7
   1  -9   0 2700.44 621.738   8
  -1   9  -1 30930.1 1453.51  38
  -1   9  -1 33359.8 1531.73  15
  -1   9  -1 34053.6 2261.80  10
   1  -9   1 38464.5 2547.60   7
   1  -9   1 31154.5 3043.14   4
  -1   9  -2 16442.9 889.180  15
   1  -9   2 18830.8 2243.59   4
   1  -9   2 17649.0 1640.68   7
  -1   9  -2 14748.0 1409.51  10
  -1   9  -3 59001.0 2545.90  38
  -1   9  -3 61494.8 2606.31  15
   1  -9   3 61763.4 4541.61   4
   1  -9   3 68751.6 3736.71   7
  -1   9  -3 63449.8 3432.42  10
  -1   9  -4 7196.67 480.799  38
  -1   9  -4 8579.94 536.044  15
   1  -9   4 7600.53 1437.82   4
   1  -9   4 8696.24 1112.06   7
  -1   9  -4 8237.79 989.101  10
  -1   9  -5 14634.6 796.720  38
  -1   9  -5 16824.4 847.539  15
   1  -9   5 15382.6 1509.02   7
  -1   9  -5 16532.1 1415.50  10
  -1   9  -6 7389.64 482.085  38
   1  -9   6 8391.00 1569.17   4
  -1   9  -6 8237.13 950.265  10
   1  -9   6 9657.99 1150.20   7
  -1   9  -7 22412.8 1078.07  38
   1  -9   7 25367.5 2709.93   4
   1  -9   7 21253.2 1819.12   7
  -1   9  -8 6768.52 441.416  38
   1  -9   8 8049.24 797.551  33
   1  -9   8 8833.36 1474.40   9
  -1   9  -9 43819.3 1923.89  38
   1  -9   9 45555.0 3781.15   4
   1  -9   9 50357.3 2511.42  33
   1  -9   9 47811.2 3614.09   9
  -1   9 -10 2542.13 237.343  38
   1  -9  10 3883.45 538.199  33
   1  -9  10 2565.12 544.724  23
   1  -9  10 2067.88 791.986   4
   1  -9  11 14038.3 1095.68  33
   1  -9  11 10951.2 1145.20  23
   1  -9  11 11059.5 1670.89   4
   1  -9  12 3873.89 649.021  23
   1  -9  12 4043.66 556.793  33
   1  -9  13 6412.92 854.641  23
   1  -9  13 8845.31 903.100  31
   1  -9  13 8190.33 806.214  33
   1  -9  14 2207.45 474.771  23
   1  -9  14 2163.49 397.013  33
   1  -9  14 2855.18 501.964  31
   1  -9  15 3362.46 562.728  23
   1  -9  15 3098.79 527.677  31
   1  -9  16 3715.53 556.399  23
   1  -9  16 3735.47 547.391  31
   1  -9  17 6900.75 744.033  23
   1  -9  17 7721.00 765.411  31
   1  -9  18 5319.22 594.832  23
   1  -9  18 5527.17 597.748  31
   1  -9  19 7187.73 635.803  23
   1  -9  19 6465.13 590.370  31
   1  -8 -14 2296.78 420.412   7
  -1   8  13 6155.71 647.556  16
   1  -8 -13 6736.65 787.236   7
  -1   8  12 1339.45 336.578  16
   1  -8 -12 1203.14 412.971   7
  -1   8  11 8899.72 875.302  16
  -1   8  10 634.144 285.012  16
  -1   8   9 830.863 326.132  16
  -1   8   8 26170.2 1772.75  16
  -1   8   7 2207.90 459.430  16
   1  -8  -7 1466.62 437.357   8
  -1   8   6 31847.8 1503.31  15
   1  -8  -6 30407.8 2175.19   8
  -1   8   5 219.153 80.6654  38
  -1   8   5 428.069 133.188  15
   1  -8  -5 704.580 515.078   4
   1  -8  -5 432.839 277.027   8
  -1   8   4 20649.1 978.029  38
  -1   8   4 21189.0 1100.80  15
   1  -8  -4 20793.2 1720.28   8
  -1   8   3 20507.8 980.141  38
   1  -8  -3 24346.1 2465.00   4
  -1   8   3 22791.3 1544.48   1
  -1   8   3 20408.0 1686.37  10
   1  -8  -3 20455.8 1704.49   8
  -1   8   2 17468.0 852.489  38
  -1   8   2 16656.8 926.456  15
   1  -8  -2 21135.7 2295.21   4
  -1   8   2 17595.5 1534.45  10
   1  -8  -2 17704.8 1530.92   8
  -1   8   1 44241.9 1900.34  38
  -1   8   1 44094.1 1985.98  15
   1  -8  -1 42770.2 2723.06   8
  -1   8   0 84080.0 3426.64  38
  -1   8   0 84824.2 3514.61  15
   1  -8   0 76128.2 4257.64   8
  -1   8  -1 11618.4 655.611  38
  -1   8  -1 13542.7 746.393  15
   1  -8   1 13394.1 1385.65   7
  -1   8  -1 11808.5 1174.06  10
  -1   8  -2 19870.9 1020.00  15
  -1   8  -2 18451.9 1519.55  10
   1  -8   2 21928.8 1796.35   7
  -1   8  -3 2075.92 217.862  38
  -1   8  -3 2859.09 278.381  15
  -1   8  -3 2505.98 517.850  10
   1  -8   3 2328.55 570.008   7
   1  -8   3 2293.25 540.855   8
  -1   8  -4 14390.9 754.559  38
  -1   8  -4 15835.1 816.628  15
   1  -8   4 18689.3 2101.77   4
  -1   8  -4 14468.6 1273.07  10
   1  -8   4 14197.1 1423.79   7
   1  -8   4 13981.6 1349.10   8
  -1   8  -5 19962.7 975.610  38
  -1   8  -5 21947.4 1031.92  15
   1  -8   5 19110.4 1706.45   7
   1  -8   5 18852.3 1608.78   8
  -1   8  -5 20363.9 1562.84  10
  -1   8  -6 51063.7 2175.34  38
  -1   8  -6 52693.2 2202.80  15
   1  -8   6 53916.3 4066.45   4
  -1   8  -6 51678.9 2885.06  10
   1  -8   6 47861.3 3092.56   7
  -1   8  -7 38647.6 1654.64  38
   1  -8   7 40070.4 3420.39   4
  -1   8  -7 37129.3 2284.57  10
   1  -8   7 33749.6 2461.87   7
  -1   8  -8 36947.5 1602.76  38
   1  -8   8 32980.7 3119.52   4
   1  -8   8 32437.2 2385.27   7
  -1   8  -8 37176.0 2231.35  10
  -1   8  -9 28896.3 1313.20  38
   1  -8   9 29569.1 2831.33   4
   1  -8   9 30844.1 1843.44  33
   1  -8   9 31633.6 2764.72   9
  -1   8 -10 15524.9 778.089  38
   1  -8  10 17552.0 1254.72  33
   1  -8  10 16211.8 1854.69   9
   1  -8  10 13348.5 1859.91   4
   1  -8  11 23805.0 1718.32  31
   1  -8  11 24207.8 1554.29  33
   1  -8  11 19202.9 1620.15  23
   1  -8  11 16437.3 2083.08   4
   1  -8  12 15544.1 1201.50  33
   1  -8  12 15569.0 1372.50  31
   1  -8  12 13210.2 1301.19  23
   1  -8  13 26750.2 2013.18  23
   1  -8  13 33227.4 2156.60  31
   1  -8  13 30477.4 1890.81  33
   1  -8  14 16521.5 1456.89  23
   1  -8  14 17410.5 1325.87  33
   1  -8  14 19570.4 1577.96  31
   1  -8  15 25007.4 1828.90  23
   1  -8  15 27254.9 1904.78  31
   1  -8  15 22680.9 1583.76  33
   1  -8  16 4931.48 733.074  23
   1  -8  16 6880.60 874.304  31
   1  -8  17 7661.74 871.903  23
   1  -8  17 8934.59 963.462  31
   1  -8  18 2147.91 433.226  23
   1  -8  18 2158.29 455.480  31
   1  -8  18 1767.13 438.437  30
   1  -8  19 88.7592 156.831  23
   1  -8  19 339.189 207.526  31
   1  -8  20 2024.75 344.676  23
   1  -8  20 1548.67 286.180  34
   1  -8  20 2530.97 414.258  31
   1  -7 -16 2135.73 373.991   7
  -1   7  15 3307.90 467.043  16
   1  -7 -15 3293.76 532.135   7
  -1   7  14 3209.68 500.065  16
  -1   7  13 2055.13 425.582  16
  -1   7  12 6161.33 762.189  16
  -1   7  11 42.4065 183.369  16
  -1   7  10 5526.76 761.769  16
  -1   7   9 6789.06 470.622  15
  -1   7   9 5989.04 798.652  16
   1  -7  -9 5069.44 749.637   8
  -1   7   8 493.817 131.021  15
   1  -7  -8 481.955 280.216   8
  -1   7   7 591.898 144.145  15
   1  -7  -7 937.807 364.254   8
  -1   7   6 1268.74 144.112  38
  -1   7   6 1250.88 199.780  15
   1  -7  -6 1380.65 407.421   8
  -1   7   5 2315.47 204.981  38
  -1   7   5 2247.15 266.107  15
   1  -7  -5 2232.93 504.508   8
  -1   7   5 2257.07 501.720  10
  -1   7   4 92261.3 3731.59  38
   1  -7  -4 101679. 4723.26   8
  -1   7   4 100371. 4414.03   1
  -1   7   3 51527.4 2121.13  38
  -1   7   3 45562.7 2823.04  10
   1  -7  -3 53713.2 2954.01   8
  -1   7   2 62755.7 2527.38  38
  -1   7   2 61332.9 2631.44  15
   1  -7  -2 64471.4 3350.74   8
  -1   7   2 53484.6 3208.31  10
  -1   7   1 32974.8 1448.22  38
  -1   7   1 34297.4 1546.51  15
   1  -7  -1 32843.0 2109.60   8
  -1   7   0 79166.4 3275.97  38
  -1   7   0 85626.4 3377.52  15
   1  -7   0 77627.9 4008.64   8
  -1   7  -1 5793.47 420.375  15
  -1   7  -1 4742.71 675.733  10
  -1   7  -2 60756.1 2640.10  38
  -1   7  -2 70730.9 2747.86  15
   1  -7   2 71782.5 3641.60   7
  -1   7  -2 63968.7 3312.74  10
  -1   7  -3 267.310 93.9284  38
   1  -7   3 144.822 144.755  18
  -1   7  -3 566.208 130.951  15
   1  -7   3 128.316 202.934   8
  -1   7  -3 413.140 241.161  10
   1  -7   3 294.618 307.900   7
  -1   7  -4 108414. 4491.99  38
  -1   7  -4 125185. 4584.42  15
   1  -7   4 97897.2 5192.52   8
   1  -7   4 115377. 5478.66   7
  -1   7  -4 111450. 5182.25  10
  -1   7  -5 1722.45 182.534  38
  -1   7  -5 1792.19 206.186  15
   1  -7   5 1915.11 491.815   7
   1  -7   5 1859.92 429.936   8
  -1   7  -5 1557.81 373.375  10
   1  -7   6 28781.4 1210.22  35
  -1   7  -6 27996.4 1233.26  38
  -1   7  -6 27825.6 1262.99  15
   1  -7   6 31966.3 2732.18   4
  -1   7  -6 26869.2 1743.97  10
   1  -7   6 26899.5 1989.07   7
   1  -7   7 261.763 70.6061  35
  -1   7  -7 44.0549 64.4492  38
  -1   7  -7 79.5592 68.0911  15
   1  -7   7 385.318 416.546   4
   1  -7   7 104.063 246.497   7
  -1   7  -7 69.8937 165.593  10
   1  -7   8 40098.9 1696.89  35
  -1   7  -8 40737.4 1706.35  38
   1  -7   8 37841.2 3148.46   4
  -1   7  -8 38326.9 2219.41  10
   1  -7   8 33829.2 2435.87   7
   1  -7   9 250.836 79.7038  35
  -1   7  -9 484.324 100.748  38
   1  -7   9 98.1843 355.319   4
   1  -7   9 42.9504 195.003  31
   1  -7   9 94.8769 114.792  33
   1  -7   9 255.811 368.820   9
   1  -7  10 16971.0 1224.84  33
   1  -7  10 15029.4 1355.70  31
  -1   7 -10 15672.2 751.816  38
   1  -7  10 15212.5 775.002  35
   1  -7  11 13547.7 1791.14   4
   1  -7  11 19592.0 1342.18  33
   1  -7  11 16185.6 1455.15  31
   1  -7  11 14089.1 1350.58  23
  -1   7 -11 17551.3 819.215  38
   1  -7  11 18017.8 875.116  35
   1  -7  12 56619.9 2287.84  35
   1  -7  12 54031.3 3125.77  31
   1  -7  12 57669.1 2889.65  33
   1  -7  13 6797.70 459.307  35
   1  -7  13 5928.93 849.470  23
   1  -7  13 6328.24 894.963  31
   1  -7  13 6394.41 762.464  33
   1  -7  14 28761.5 1334.78  35
   1  -7  14 26721.3 1979.96  23
   1  -7  14 26885.6 1851.94  27
   1  -7  14 27519.0 2060.87  31
   1  -7  14 27388.3 1818.89  33
   1  -7  15 17467.2 1514.66  23
   1  -7  15 19389.3 1425.84  33
   1  -7  15 18165.4 1604.88  31
   1  -7  16 30549.8 2122.80  23
   1  -7  16 34126.7 2313.28  31
   1  -7  17 16834.3 1416.63  23
   1  -7  17 17498.9 1517.40  31
   1  -7  18 27417.7 1808.85  23
   1  -7  18 25003.1 1887.64  30
   1  -7  18 25804.6 1901.75  31
   1  -7  19 926.985 332.399  30
   1  -7  19 694.414 326.498  31
   1  -7  20 15926.9 1178.92  34
   1  -7  20 17504.3 1338.74  31
   1  -7  21 48.9080 110.948  34
   1  -7  21 242.441 180.653  31
   1  -7  21 50.9242 155.735  23
  -1   6  18 3285.42 449.709  21
  -1   6  17 5961.79 718.404  21
   1  -6 -17 5308.09 608.741   7
  -1   6  17 6543.16 580.071  25
  -1   6  16 2777.81 345.611  37
  -1   6  16 3247.56 508.234  16
  -1   6  16 3953.78 461.027  25
  -1   6  15 4403.12 484.723  37
  -1   6  15 5569.86 571.543  25
  -1   6  14 3404.42 473.309  25
  -1   6  13 15935.0 1354.09  16
  -1   6  13 17805.6 1235.67  25
  -1   6  12 10709.6 890.430  36
  -1   6  12 11334.5 1116.62  16
  -1   6  12 11819.6 981.298  25
  -1   6  11 479.049 185.933  36
  -1   6  11 586.110 289.884  16
  -1   6  11 616.272 243.789  25
  -1   6  10 30524.4 1768.60  36
  -1   6  10 31581.1 1453.61  15
  -1   6  10 30234.2 2032.81  16
  -1   6  10 34494.3 1920.82  25
  -1   6   9 4444.05 508.205  36
  -1   6   9 3633.67 326.503  15
  -1   6   8 2388.30 358.830  36
  -1   6   8 2319.79 253.847  15
   1  -6  -8 2909.46 548.669   8
  -1   6   7 23693.3 1371.15  36
  -1   6   7 22333.5 1008.07  38
  -1   6   7 24450.8 1140.14  15
   1  -6  -7 26944.4 1769.31   8
  -1   6   6 818.298 108.691  38
  -1   6   6 779.621 205.759  36
  -1   6   6 998.356 164.912  15
  -1   6   6 1160.74 325.512  10
   1  -6  -6 1001.59 319.480   8
  -1   6   5 67091.2 2666.66  38
  -1   6   5 65614.4 2780.24  15
  -1   6   4 260.979 70.9807  38
  -1   6   4 38.7382 159.127  10
   1  -6  -4 270.005 197.519   8
  -1   6   3 75526.3 2999.89  38
   1  -6  -3 83182.5 3771.14   8
  -1   6   2 141.365 63.6616  38
  -1   6   2 157.699 93.5364  15
  -1   6   1 104387. 4109.52  38
   1  -6  -1 103507. 4300.92  18
  -1   6   1 103362. 4198.32  15
  -1   6   0 2240.82 185.676  38
   1  -6   0 1542.86 240.837  18
  -1   6   0 1680.28 206.368  15
   1  -6   1 89561.0 3908.40  18
  -1   6  -1 97916.9 3827.78  15
  -1   6  -2 4879.03 311.499  38
  -1   6  -2 5755.64 371.232  15
   1  -6   2 4532.53 406.040  18
  -1   6  -3 116143. 4842.32  38
  -1   6  -3 135726. 4937.08  15
  -1   6  -4 31630.7 1419.32  38
  -1   6  -4 36684.1 1492.20  15
  -1   6  -5 41134.4 1778.56  38
   1  -6   5 41739.7 1957.45  18
  -1   6  -5 46126.9 1833.80  15
  -1   6  -6 22394.9 981.783  38
   1  -6   6 21934.0 964.526  35
  -1   6  -6 21607.4 999.503  15
   1  -6   6 21337.1 1129.28  18
  -1   6  -7 25034.1 1043.20  38
   1  -6   7 22609.5 1028.70  35
  -1   6  -7 22536.1 1040.84  15
  -1   6  -8 26985.3 1130.39  38
   1  -6   8 24466.0 1127.66  35
   1  -6   9 7866.56 753.485  33
   1  -6   9 7678.50 888.456  31
   1  -6   9 7858.94 1213.29   4
  -1   6  -9 9014.01 463.828  38
   1  -6   9 8462.49 478.217  35
   1  -6  10 22454.5 1698.64  31
   1  -6  10 24473.5 1530.67  33
   1  -6  10 23642.2 1094.90  35
  -1   6 -10 24539.2 1051.89  38
   1  -6  11 4664.02 973.061   4
   1  -6  11 8075.74 474.379  35
   1  -6  11 6239.81 812.826  23
   1  -6  11 6282.25 857.787  31
   1  -6  11 8208.02 795.336  33
   1  -6  12 17405.9 861.921  35
   1  -6  12 17659.5 1281.36  33
   1  -6  12 15942.6 1451.37  31
   1  -6  13 2795.06 272.575  35
   1  -6  13 2089.24 486.708  23
   1  -6  13 2578.87 470.843  33
   1  -6  13 1899.89 507.117  31
   1  -6  14 454.339 127.513  35
   1  -6  14 547.636 257.044  22
   1  -6  14 195.072 221.780  23
   1  -6  14 581.342 306.176  27
   1  -6  14 394.161 278.097  31
   1  -6  14 475.029 230.239  33
   1  -6  15 24807.6 1223.70  35
   1  -6  15 24855.4 1706.05  22
   1  -6  15 21665.1 1754.58  23
   1  -6  15 23696.0 1725.45  27
   1  -6  15 24398.3 1939.86  31
   1  -6  16 8519.26 565.224  35
   1  -6  16 6969.54 850.093  22
   1  -6  16 7865.61 958.855  23
   1  -6  16 8268.79 1065.32  31
   1  -6  17 39170.4 2397.27  22
   1  -6  17 44476.3 2751.94  31
   1  -6  18 3103.06 550.251  22
   1  -6  18 2786.21 615.882  31
   1  -6  18 3607.24 662.399  30
   1  -6  19 30333.8 1927.35  22
   1  -6  19 32410.0 2073.47  23
   1  -6  19 32218.2 2165.17  30
   1  -6  19 32877.0 2192.77  31
   1  -6  20 2503.26 494.358  23
   1  -6  20 2136.49 508.514  31
   1  -6  20 1759.85 396.253  34
   1  -6  21 74323.2 3795.57  34
   1  -6  21 82569.3 3990.56  31
   1  -6  22 1664.86 315.244  23
   1  -6  22 1312.17 274.718  34
  -1   5  19 138.421 185.520  21
  -1   5  18 10963.3 790.968  37
  -1   5  18 12815.5 1113.15  21
  -1   5  18 13456.8 950.107  25
  -1   5  17 22575.2 1367.30  37
  -1   5  17 25844.1 1489.19  25
  -1   5  16 20848.7 1377.27  37
  -1   5  16 24626.5 1648.78  16
  -1   5  16 24140.2 1504.33  25
  -1   5  15 3943.73 653.375  16
  -1   5  15 4852.21 623.903  25
  -1   5  14 27898.0 1758.55  36
  -1   5  14 34678.5 1970.30  25
  -1   5  14 30872.7 2105.66  26
  -1   5  13 28096.1 1945.56  26
  -1   5  13 30458.9 1811.53  25
  -1   5  12 1983.15 380.700  36
  -1   5  12 3017.19 571.616  26
  -1   5  12 2710.33 478.757  25
  -1   5  11 6112.83 663.148  36
  -1   5  11 6910.76 822.462  16
  -1   5  11 7551.94 793.419  25
  -1   5  11 6741.62 833.651  26
  -1   5  10 752.161 219.866  36
  -1   5  10 507.184 116.852  15
  -1   5  10 829.111 316.331  26
  -1   5  10 466.103 204.712  25
  -1   5   9 1101.25 251.599  36
  -1   5   9 1235.42 171.534  15
  -1   5   9 1536.40 329.542  25
  -1   5   9 795.221 287.083  26
  -1   5   8 26232.1 1215.77  15
  -1   5   8 28877.2 1647.78  25
  -1   5   8 30312.3 1758.12  26
  -1   5   7 2595.46 354.717  36
  -1   5   7 2558.57 176.759  38
  -1   5   7 2140.08 228.388  15
  -1   5   6 38425.7 1554.10  38
  -1   5   6 36721.6 1648.11  15
  -1   5   5 659.487 89.9377  38
  -1   5   5 516.055 117.025  15
  -1   5   4 125855. 4688.64  38
  -1   5   4 110056. 4763.16  15
  -1   5   3 1578.64 139.892  38
   1  -5  -3 1255.81 204.899  18
  -1   5   2 221844. 8258.73  38
   1  -5  -2 225296. 8427.31  18
  -1   5   1 67000.2 2654.42  38
  -1   5   1 65234.9 2719.72  15
   1  -5  -1 67111.4 2800.41  18
   1  -5   0 52134.3 2307.57  18
  -1   5   0 55643.2 2254.49  15
   1  -5   1 17839.4 937.721  18
  -1   5  -1 19457.7 889.829  15
  -1   5  -2 100023. 4004.33  38
   1  -5   2 95803.2 4127.45  18
  -1   5  -3 81369.9 3377.19  38
  -1   5  -3 92912.9 3449.83  15
  -1   5  -4 15325.3 704.377  38
   1  -5   4 14094.7 812.719  18
  -1   5  -5 12485.1 589.551  38
  -1   5  -5 12374.5 615.733  15
   1  -5   5 13154.7 716.954  18
   1  -5   6 18906.7 820.913  35
  -1   5  -6 18985.8 821.241  38
  -1   5  -6 17512.2 830.504  15
   1  -5   6 18772.1 946.416  18
  -1   5  -7 98784.1 3761.25  38
   1  -5   7 96061.6 3770.56  35
  -1   5  -7 91862.4 3755.88  15
  -1   5  -8 2513.10 183.263  38
   1  -5   8 2217.41 190.699  35
   1  -5   9 4802.20 543.118  33
   1  -5   9 5330.32 336.723  35
  -1   5  -9 5357.43 302.347  38
   1  -5  10 4201.90 641.690  31
   1  -5  10 5184.38 581.415  33
   1  -5  10 4938.17 333.758  35
  -1   5 -10 5260.05 292.749  38
   1  -5  11 1153.67 155.907  35
   1  -5  11 1222.77 425.526  20
   1  -5  11 1467.21 318.963  33
   1  -5  11 1691.36 428.553  31
   1  -5  11 1016.23 324.022  23
   1  -5  12 1027.87 156.736  35
   1  -5  12 1110.73 452.764  20
   1  -5  12 875.733 270.416  33
   1  -5  12 722.071 310.359  31
   1  -5  12 458.592 281.066  23
   1  -5  12 604.124 240.155  22
   1  -5  13 689.299 146.435  35
   1  -5  13 683.560 420.190  20
   1  -5  13 582.975 229.677  33
   1  -5  13 516.737 300.812  31
   1  -5  13 840.303 315.224  27
   1  -5  13 529.863 284.293  23
   1  -5  13 735.512 276.179  22
   1  -5  14 12277.1 686.924  35
   1  -5  14 10506.9 1272.63  20
   1  -5  14 11308.0 1038.43  33
   1  -5  14 9552.36 1144.94  31
   1  -5  14 9960.07 1068.77  27
   1  -5  14 9889.90 1025.50  22
   1  -5  15 2561.62 288.439  35
   1  -5  15 2809.68 782.587  20
   1  -5  15 2911.89 627.813  31
   1  -5  15 2745.88 533.175  27
   1  -5  15 2615.57 524.146  22
   1  -5  16 1994.84 259.155  35
   1  -5  16 2304.35 799.127  20
   1  -5  16 2481.15 524.279  22
   1  -5  16 2176.16 473.327  27
   1  -5  16 2103.16 559.251  31
   1  -5  17 5722.24 457.735  35
   1  -5  17 5871.93 757.989  27
   1  -5  17 7035.66 984.853  30
   1  -5  17 5212.77 851.873  31
   1  -5  17 6635.51 867.330  23
   1  -5  17 4944.67 737.157  22
   1  -5  18 21542.0 1838.07  31
   1  -5  18 22891.2 1882.37  30
   1  -5  18 23254.7 1716.08  22
   1  -5  18 25077.4 1815.01  23
   1  -5  19 30776.1 2180.66  30
   1  -5  19 31778.0 2065.88  23
   1  -5  19 29363.3 1988.99  22
   1  -5  20 37974.0 2363.06  34
   1  -5  20 44415.8 2442.19  23
   1  -5  20 40823.2 2372.27  22
   1  -5  21 14147.1 1184.71  34
   1  -5  21 16573.2 1381.48  31
   1  -5  21 18745.2 1295.47  23
   1  -5  22 7574.20 802.993  31
   1  -5  22 5651.70 625.877  34
   1  -5  23 3467.52 416.483  34
   1  -5  23 4160.45 503.815  31
  -1   4  20 2348.58 296.423  37
  -1   4  20 2428.44 430.534  21
  -1   4  19 7638.38 662.239  37
  -1   4  19 8711.84 920.164  21
  -1   4  19 9365.29 807.048  25
  -1   4  18 44151.1 2594.21  21
  -1   4  18 45369.5 2273.46  25
  -1   4  17 29736.4 1842.82  37
  -1   4  17 33828.0 2312.28  21
  -1   4  17 36478.4 2014.38  25
  -1   4  16 4037.02 646.816  16
  -1   4  16 5031.72 659.152  25
  -1   4  16 6013.43 939.203  26
  -1   4  15 15931.2 1378.04  16
  -1   4  15 18253.2 1512.21  26
  -1   4  15 16573.7 1316.54  25
  -1   4  14 6034.08 699.056  36
  -1   4  14 4878.60 744.257  20
  -1   4  14 6881.49 856.118  16
  -1   4  14 8398.01 966.257  26
  -1   4  14 6854.36 787.687  25
  -1   4  13 5574.78 654.204  36
  -1   4  13 6270.68 810.630  16
  -1   4  13 4873.00 743.882  20
  -1   4  13 6579.98 864.481  26
  -1   4  13 6479.93 762.407  25
  -1   4  12 26027.3 1623.92  36
  -1   4  12 22781.3 1747.38  20
  -1   4  12 29635.4 1939.79  26
  -1   4  12 27559.0 1759.10  25
  -1   4  11 10190.5 867.581  36
  -1   4  11 12588.6 1121.07  26
  -1   4  11 11711.1 1004.36  25
  -1   4  10 4308.86 511.062  36
  -1   4  10 4669.79 329.555  15
  -1   4  10 4610.76 591.987  25
  -1   4  10 5484.18 694.339  26
  -1   4   9 31681.8 1371.63  15
  -1   4   9 32388.3 1830.05  25
  -1   4   9 34451.9 1955.38  26
  -1   4   8 4407.49 465.456  36
  -1   4   8 4004.10 223.275  38
  -1   4   8 4808.24 314.791  15
  -1   4   7 6454.69 315.900  38
  -1   4   7 5907.49 381.035  15
  -1   4   6 15949.0 675.502  38
  -1   4   6 14657.3 744.845  15
  -1   4   5 104674. 3950.41  38
  -1   4   5 95246.1 4018.44  15
  -1   4   4 15999.6 656.190  38
  -1   4   4 12833.2 702.057  15
  -1   4   3 35834.9 1469.48  38
   1  -4  -3 37217.5 1586.28  18
  -1   4   2 11388.4 505.524  38
  -1   4   2 10013.1 551.233  15
   1  -4  -2 11316.2 600.563  18
  -1   4   1 31955.9 1281.02  38
  -1   4   1 28734.3 1342.55  15
   1  -4  -1 33029.8 1391.06  18
   1  -4   0 38800.0 1646.85  18
  -1   4   0 37751.5 1598.99  15
  -1   4  -1 123091. 4555.98  15
   1  -4   1 106906. 4581.36  18
  -1   4  -2 259421. 9243.60  15
   1  -4   2 214698. 9267.80  18
  -1   4  -3 627.505 81.1002  38
  -1   4  -3 493.665 95.1321  15
  -1   4  -4 213329. 8440.37  38
  -1   4  -4 222782. 8476.01  15
   1  -4   4 227636. 8564.33  18
  -1   4  -5 63778.6 2446.69  38
   1  -4   5 59744.7 2440.25  35
   1  -4   5 65005.0 2558.81  18
  -1   4  -5 60465.5 2461.68  15
   1  -4   6 30699.9 1244.64  35
  -1   4  -6 30672.3 1231.45  38
   1  -4   6 30019.8 1331.89  18
  -1   4  -6 28461.9 1228.12  15
   1  -4   7 33558.6 1373.84  35
  -1   4  -7 35538.0 1354.52  38
  -1   4  -7 30838.2 1329.56  15
  -1   4  -8 5480.40 284.909  38
   1  -4   8 5132.17 312.779  35
   1  -4   9 3989.49 267.504  35
  -1   4  -9 3703.16 216.269  38
  -1   4 -10 165.829 45.8760  38
   1  -4  10 222.716 143.724  37
   1  -4  10 179.218 68.2638  35
   1  -4  10 334.092 153.328  33
   1  -4  11 22581.5 1006.99  35
   1  -4  11 22414.9 1361.35  37
   1  -4  11 17881.1 1470.33  31
   1  -4  11 21076.9 1360.76  33
   1  -4  11 16599.1 1362.03  23
   1  -4  12 12511.5 662.268  35
   1  -4  12 12033.2 962.671  37
   1  -4  12 11392.2 1271.22  21
   1  -4  12 10937.0 1169.62  20
   1  -4  12 11800.5 1138.54  31
   1  -4  12 10894.2 956.193  33
   1  -4  12 9839.44 1014.54  27
   1  -4  12 11646.8 1036.71  22
   1  -4  13 1269.10 183.203  35
   1  -4  13 1114.13 288.323  37
   1  -4  13 1332.20 444.440  20
   1  -4  13 561.501 768.849  21
   1  -4  13 632.719 307.688  31
   1  -4  13 1006.95 287.774  33
   1  -4  13 784.393 312.294  27
   1  -4  13 1250.43 352.736  22
   1  -4  14 9301.95 583.947  35
   1  -4  14 9039.65 864.862  37
   1  -4  14 8844.07 1315.91  21
   1  -4  14 9602.27 1163.47  20
   1  -4  14 7059.46 948.053  31
   1  -4  14 7931.87 900.517  22
   1  -4  14 7545.66 913.880  27
   1  -4  15 327.331 211.323  37
   1  -4  15 284.991 116.758  35
   1  -4  15 577.001 361.636  20
   1  -4  15 797.033 1117.34  21
   1  -4  15 140.037 202.186  27
   1  -4  15 499.930 271.137  22
   1  -4  15 382.644 261.873  23
   1  -4  16 24334.1 1204.10  35
   1  -4  16 23355.2 1606.16  37
   1  -4  16 21975.1 2114.02  21
   1  -4  16 22239.9 1997.30  20
   1  -4  16 24454.2 1766.18  27
   1  -4  16 22878.3 1930.97  30
   1  -4  16 23958.2 1757.80  22
   1  -4  16 20379.4 1691.07  23
   1  -4  17 15967.1 913.595  35
   1  -4  17 15598.5 1285.38  37
   1  -4  17 16628.4 1705.08  20
   1  -4  17 17698.1 1632.46  30
   1  -4  17 17731.5 1425.19  27
   1  -4  17 15114.0 1384.55  22
   1  -4  17 16484.8 1445.51  23
   1  -4  18 38521.4 1815.47  35
   1  -4  18 40842.0 2320.17  37
   1  -4  18 39657.8 2831.47  20
   1  -4  18 39905.5 2473.14  22
   1  -4  18 39276.5 2466.42  23
   1  -4  18 41562.1 2696.75  30
   1  -4  18 36299.8 2250.04  28
   1  -4  18 42187.2 2711.78  31
   1  -4  19 456.320 840.911  20
   1  -4  19 56.2117 266.292  31
   1  -4  19 327.685 258.726  30
   1  -4  19 289.259 255.345  34
   1  -4  19-44.9542 260.826  23
   1  -4  19 93.0988 238.197  22
   1  -4  20 4529.18 670.067  34
   1  -4  20 3864.61 688.767  31
   1  -4  20 5063.47 690.289  23
   1  -4  20 4621.04 688.919  22
   1  -4  21 481.542 287.806  31
   1  -4  21 535.200 251.532  34
   1  -4  21 525.887 291.278  22
   1  -4  21 615.628 273.464  23
   1  -4  22 20987.5 1447.72  34
   1  -4  22 25214.8 1609.31  31
   1  -4  23 1910.14 325.802  34
  -1   3  21 5747.91 514.818  37
  -1   3  21 6939.02 709.233  21
  -1   3  20 8816.26 765.838  37
  -1   3  20 10346.7 1014.40  21
  -1   3  19 8810.71 811.910  37
  -1   3  19 10862.8 1118.04  21
  -1   3  19 11179.0 942.240  25
  -1   3  18 9194.65 874.699  37
  -1   3  18 12649.9 1276.58  21
  -1   3  18 10995.4 987.599  25
  -1   3  17 6955.60 961.236  20
  -1   3  17 9015.37 1142.23  21
  -1   3  17 10403.8 1150.14  26
  -1   3  17 9933.42 958.315  25
  -1   3  16 4506.28 765.427  20
  -1   3  16 5547.39 745.340  16
  -1   3  16 5961.59 846.819  26
  -1   3  16 6037.93 742.468  25
  -1   3  15 44621.6 2449.46  36
  -1   3  15 47272.9 2637.82  16
  -1   3  15 45009.7 2762.51  14
  -1   3  15 38383.0 2677.86  20
  -1   3  15 36954.3 2374.93  22
  -1   3  15 51275.2 2842.63  26
  -1   3  15 50455.7 2636.03  25
  -1   3  14 1688.42 370.277  36
  -1   3  14 1271.71 439.194  20
  -1   3  14 1348.29 390.456  16
  -1   3  14 1981.03 516.271  14
  -1   3  14 1308.79 346.491  22
  -1   3  14 2036.83 429.686  25
  -1   3  14 2545.44 540.990  26
  -1   3  13 29844.4 1840.02  36
  -1   3  13 27793.1 2078.11  20
  -1   3  13 32300.3 2048.35  16
  -1   3  13 32994.4 2049.70  29
  -1   3  13 33523.2 2001.20  25
  -1   3  13 34360.3 2172.98  26
  -1   3  12 7230.73 722.505  36
  -1   3  12 6169.53 826.298  20
  -1   3  12 6589.33 794.826  16
  -1   3  12 7810.11 839.135  29
  -1   3  12 7899.80 823.371  25
  -1   3  12 9138.08 956.133  26
  -1   3  11 17786.6 1220.92  36
  -1   3  11 16531.6 1327.76  16
  -1   3  11 18288.2 1440.54  20
  -1   3  11 21460.6 1433.84  29
  -1   3  11 20502.9 1471.76  26
  -1   3  11 20229.2 1369.31  25
  -1   3  10 623.157 183.843  36
  -1   3  10 466.069 214.684  16
  -1   3  10 540.664 218.589  29
  -1   3  10 832.750 254.951  25
  -1   3  10 534.451 229.610  26
  -1   3   9 30008.8 1759.83  36
  -1   3   9 37193.2 1502.74  15
  -1   3   8 21311.1 894.639  38
  -1   3   8 23193.3 1263.10  36
  -1   3   8 25262.8 1006.64  15
  -1   3   7 103383. 4004.55  38
  -1   3   7 104110. 4085.73  15
  -1   3   6 799.741 75.4640  38
  -1   3   6 795.391 110.841  15
  -1   3   5 15234.8 629.560  38
  -1   3   5 14061.5 679.346  15
  -1   3   4 2372.97 143.432  38
  -1   3   4 2260.42 183.359  15
   1  -3  -3 27368.6 1181.70  18
   1  -3  -2 1981.07 176.713  18
  -1   3   2 2035.80 163.252  15
   1  -3  -1 30717.5 1268.68  18
  -1   3   1 28752.0 1240.19  15
  -1   3   0 3033.54 198.889  15
   1  -3   0 2818.36 216.030  18
  -1   3  -1 96041.9 3541.02  15
   1  -3   1 83109.6 3562.73  18
  -1   3  -2 4862.89 269.307  15
  -1   3  -3 75378.6 2955.39  15
   1  -3   4 115025. 4210.01  35
   1  -3   4 112361. 4286.55  18
  -1   3  -4 100407. 4212.92  15
   1  -3   5 285330. 9810.30  35
   1  -3   5 264315. 9870.92  18
  -1   3  -6 14096.8 576.979  38
   1  -3   6 14728.3 606.562  35
  -1   3  -7 202660. 6936.93  38
   1  -3   7 206991. 6991.70  35
   1  -3   8 34127.7 1413.85  35
  -1   3  -8 33494.6 1346.48  38
   1  -3   9 25417.4 1034.88  35
  -1   3  -9 22063.1 928.702  38
   1  -3  10 69065.9 3404.01  33
   1  -3  10 79009.4 3065.56  35
   1  -3  10 71754.5 3409.67  37
   1  -3  11 1388.15 299.761  33
   1  -3  11 1886.22 196.872  35
   1  -3  11 1387.57 291.055  37
   1  -3  12 3905.61 502.498  37
   1  -3  12 3878.77 307.211  35
   1  -3  12 3195.60 606.976  20
   1  -3  12 3356.92 477.606  33
   1  -3  12 3305.62 521.642  22
   1  -3  12 2610.89 479.740  23
   1  -3  13 35141.9 2053.68  37
   1  -3  13 40108.2 1689.35  35
   1  -3  13 37096.7 2340.10  21
   1  -3  13 38166.8 2480.06  20
   1  -3  13 34332.3 2227.65  27
   1  -3  13 32858.0 2162.27  23
   1  -3  13 35694.6 2189.94  22
   1  -3  13 35936.8 2050.35  24
   1  -3  14 3406.48 315.059  35
   1  -3  14 2831.50 471.614  37
   1  -3  14 2747.63 629.481  20
   1  -3  14 3271.09 639.122  21
   1  -3  14 3245.13 638.169  31
   1  -3  14 2795.49 533.438  22
   1  -3  14 3279.97 591.969  27
   1  -3  14 2814.82 415.204  25
   1  -3  14 2460.49 453.919  26
   1  -3  14 2622.42 514.893  23
   1  -3  15 47142.5 2514.34  37
   1  -3  15 47735.4 1991.21  35
   1  -3  15 45067.9 2794.73  21
   1  -3  15 45580.1 2934.69  20
   1  -3  15 38489.2 2302.65  29
   1  -3  15 48188.2 2714.16  27
   1  -3  15 42686.8 2803.61  30
   1  -3  15 41350.3 2717.22  31
   1  -3  15 40706.0 2376.90  26
   1  -3  15 40809.0 2559.08  23
   1  -3  15 39481.1 2237.55  25
   1  -3  15 42134.6 2564.91  22
   1  -3  16 41301.0 2350.72  37
   1  -3  16 42894.2 1853.41  35
   1  -3  16 43003.1 2704.55  21
   1  -3  16 41061.4 2808.25  20
   1  -3  16 34685.5 2155.36  29
   1  -3  16 44145.2 2562.57  27
   1  -3  16 42312.9 2740.59  30
   1  -3  16 37798.2 2587.99  31
   1  -3  16 39679.3 2462.78  23
   1  -3  16 35495.2 2101.05  25
   1  -3  16 35513.8 2227.98  26
   1  -3  16 37224.6 2425.71  22
   1  -3  17 4645.08 645.504  37
   1  -3  17 3428.25 351.256  35
   1  -3  17 3322.43 952.492  21
   1  -3  17 3316.28 743.912  20
   1  -3  17 4558.78 769.891  31
   1  -3  17 3786.27 539.855  29
   1  -3  17 3143.44 682.216  30
   1  -3  17 2924.16 468.155  25
   1  -3  17 3449.60 615.182  23
   1  -3  17 3256.79 536.474  26
   1  -3  17 3871.39 654.109  22
   1  -3  18 238.782 203.767  37
   1  -3  18 572.150 1023.05  21
   1  -3  18 276.684 341.111  20
   1  -3  18 257.363 233.567  34
   1  -3  18 173.710 237.659  31
   1  -3  18 299.505 283.844  30
   1  -3  18 65.2815 134.138  29
   1  -3  18 290.517 196.748  28
   1  -3  18 424.205 273.550  23
   1  -3  18 498.274 297.087  22
   1  -3  19 266.208 208.289  37
   1  -3  19 66.7181 376.297  20
   1  -3  19 751.357 1192.38  21
   1  -3  19 445.077 313.844  30
   1  -3  19 395.592 253.226  34
   1  -3  19 329.075 318.358  31
   1  -3  19 569.828 243.883  28
   1  -3  19 221.975 235.359  23
   1  -3  19 47.9950 207.817  22
   1  -3  20 69.6970 228.522  37
   1  -3  20 61.6450 715.223  20
   1  -3  20 49.3550 243.323  31
   1  -3  20 45.5116 196.791  34
   1  -3  20-40.0680 219.149  23
   1  -3  20 88.8831 210.504  22
   1  -3  21 15452.6 1295.52  31
   1  -3  21 14278.3 1207.61  34
   1  -3  21 13707.5 1204.10  22
   1  -3  22 490.790 219.969  34
  -1   2  22 15887.0 950.161  37
  -1   2  22 15571.4 1111.73  21
  -1   2  21 11897.7 901.549  37
  -1   2  21 13701.2 1150.94  21
  -1   2  21 13857.6 1089.95  25
  -1   2  20 13201.8 1047.66  37
  -1   2  20 15773.1 1365.71  21
  -1   2  20 16171.6 1195.39  25
  -1   2  19 5744.17 683.121  37
  -1   2  19 5236.17 813.852  20
  -1   2  19 6337.84 896.636  21
  -1   2  19 6748.43 745.770  25
  -1   2  18 23482.2 1589.12  37
  -1   2  18 27781.1 2057.24  21
  -1   2  18 25292.8 1659.38  25
  -1   2  17 3252.87 708.528  21
  -1   2  17 2860.68 659.037  20
  -1   2  17 2294.85 489.564  22
  -1   2  17 3067.57 547.410  25
  -1   2  17 3236.63 641.513  26
  -1   2  16 15971.5 1597.00  20
  -1   2  16 20131.3 1605.13  14
  -1   2  16 20148.7 1487.40  16
  -1   2  16 21361.2 1658.23  26
  -1   2  16 16532.0 1407.97  22
  -1   2  16 18201.1 1420.75  25
  -1   2  15-51.7328 200.098  14
  -1   2  15 106.918 137.870  36
  -1   2  15 204.925 209.708  16
  -1   2  15-58.8964 254.683  20
  -1   2  15 135.703 205.161  29
  -1   2  15 236.676 228.854  25
  -1   2  15 83.7841 190.005  22
  -1   2  15 50.0174 226.849  26
  -1   2  14 21254.6 1684.69  14
  -1   2  14 18831.3 1363.44  36
  -1   2  14 20764.4 1717.67  20
  -1   2  14 20080.9 1484.46  16
  -1   2  14 22043.5 1584.42  29
  -1   2  14 17328.3 1419.64  22
  -1   2  14 19748.0 1455.09  25
  -1   2  14 22787.1 1667.96  26
  -1   2  13 523.410 202.786  36
  -1   2  13 715.687 258.219  16
  -1   2  13 654.399 300.619  20
  -1   2  13 358.624 218.760  29
  -1   2  13 424.360 217.073  25
  -1   2  13 393.304 247.097  26
  -1   2  13 523.908 240.749  22
  -1   2  12 69266.6 3422.37  36
  -1   2  12 72426.8 3598.39  16
  -1   2  12 75970.3 3848.96  20
  -1   2  12 80747.5 3799.75  26
  -1   2  12 78985.8 3607.46  25
  -1   2  12 61524.2 3485.36  22
  -1   2  12 68523.9 3702.27  34
  -1   2  12 80626.2 3721.15  29
  -1   2  12 82099.1 3735.22  28
  -1   2  11 13722.3 1000.22  36
  -1   2  11 16716.0 1236.84  26
  -1   2  11 15337.2 1115.71  25
  -1   2  11 13806.8 1164.93  34
  -1   2  10 67712.7 3441.81  34
  -1   2  10 72827.8 3232.93  36
  -1   2   9 22556.5 1477.26  34
  -1   2   9 24817.4 1337.64  36
  -1   2   8 17336.4 724.332  38
  -1   2   8 18908.2 732.683  11
  -1   2   7 61544.0 2449.53  38
  -1   2   7 70260.7 2535.25  15
  -1   2   6 2448.90 129.168  38
  -1   2   6 2447.87 169.891  15
  -1   2   5 13553.7 606.104  15
  -1   2   4 721.096 85.6873  15
   1  -2  -3 22961.7 911.262  32
   1  -2  -2 12312.8 504.286  32
   1  -2  -1 34511.9 1383.32  32
  -1   2   1 36690.0 1422.13  15
   1  -2  -1 36214.8 1443.27  18
   1  -2   0 93480.9 3821.26  32
   1  -2   0 99290.5 3876.24  18
   1  -2   1 33752.3 1416.33  32
   1  -2   1 35984.5 1470.53  18
  -1   2  -2 422646. 16150.7  15
   1  -2   3 227388. 8569.35  32
   1  -2   3 234119. 8577.09  35
  -1   2  -3 211609. 8570.53  15
   1  -2   4 240976. 8858.82  32
   1  -2   4 256846. 8880.83  35
   1  -2   5 117065. 3843.69  35
  -1   2  -5 94528.6 3774.52  15
   1  -2   6 179993. 6949.23  35
  -1   2  -7 19124.0 783.828  38
   1  -2   7 20910.3 860.886  35
  -1   2  -8 28887.6 1170.42  11
  -1   2  -8 29647.1 1170.52  38
   1  -2   9 38201.9 1612.88  35
   1  -2  10 28329.5 1257.76  35
   1  -2  11 25211.1 1585.93  37
   1  -2  11 30634.4 1328.40  35
   1  -2  12 157685. 7242.10  37
   1  -2  12 184903. 6842.86  35
   1  -2  12 161643. 7617.74  20
   1  -2  12 161552. 7377.97  22
   1  -2  13 28544.3 1731.25  37
   1  -2  13 30982.7 1355.59  35
   1  -2  13 29757.5 2066.01  20
   1  -2  13 29972.8 1970.44  21
   1  -2  13 23786.5 1848.08  31
   1  -2  13 26985.4 1993.24  30
   1  -2  13 26016.6 1729.86  26
   1  -2  13 29273.1 1863.60  22
   1  -2  13 31214.8 1817.20  24
   1  -2  13 32288.7 1993.78  27
   1  -2  13 25663.6 1774.84  23
   1  -2  13 25084.7 1610.59  25
   1  -2  14 72557.1 3517.97  37
   1  -2  14 79446.4 3035.61  35
   1  -2  14 73513.9 3851.55  21
   1  -2  14 68180.3 3896.95  20
   1  -2  14 63569.0 3697.24  31
   1  -2  14 71178.9 3887.99  30
   1  -2  14 74592.7 3784.73  27
   1  -2  14 68896.8 3605.70  23
   1  -2  14 68333.4 3622.74  22
   1  -2  14 61734.9 3337.97  25
   1  -2  14 68721.1 3538.41  26
   1  -2  15 14267.3 809.771  35
   1  -2  15 13148.6 1143.97  37
   1  -2  15 13621.7 1430.02  20
   1  -2  15 14865.1 1385.80  21
   1  -2  15 12494.2 1105.29  29
   1  -2  15 14970.7 1437.97  30
   1  -2  15 13370.8 1323.49  31
   1  -2  15 17897.9 1440.02  27
   1  -2  15 15064.7 1281.70  23
   1  -2  15 12276.7 1139.21  26
   1  -2  15 12949.6 1061.17  25
   1  -2  15 12824.6 1212.29  22
   1  -2  16 18042.1 1410.69  37
   1  -2  16 20187.8 1794.58  20
   1  -2  16 19476.3 1652.24  21
   1  -2  16 19941.8 1740.37  30
   1  -2  16 17795.5 1365.94  29
   1  -2  16 17133.2 1579.85  31
   1  -2  16 19995.3 1498.33  26
   1  -2  16 19470.9 1511.29  23
   1  -2  16 17060.7 1303.17  25
   1  -2  16 18116.0 1515.57  22
   1  -2  17-40.9797 158.490  37
   1  -2  17 115.058 283.621  21
   1  -2  17-339.756 321.861  20
   1  -2  17-46.2320 199.906  23
   1  -2  17-175.112 207.362  26
   1  -2  17 241.596 188.772  25
   1  -2  17 49.6009 191.831  22
   1  -2  17 381.862 215.285  29
   1  -2  17 277.218 262.617  31
   1  -2  17 45.4469 186.428  28
   1  -2  17 61.0369 220.813  30
   1  -2  18 25905.9 1987.64  21
   1  -2  18 25306.2 2124.35  20
   1  -2  18 23567.7 1743.70  26
   1  -2  18 29338.0 1924.73  23
   1  -2  18 25738.9 1657.96  25
   1  -2  18 24526.6 1862.77  22
   1  -2  18 24808.0 1691.61  29
   1  -2  18 26511.8 1831.40  28
   1  -2  18 28121.3 2105.86  30
   1  -2  18 25440.4 1953.37  31
   1  -2  19 2360.46 746.426  21
   1  -2  19 1181.37 419.016  31
   1  -2  19 2315.24 551.400  30
   1  -2  19 1178.35 355.536  28
   1  -2  19 1293.62 338.998  29
   1  -2  19 1990.69 444.231  26
   1  -2  19 1066.37 329.176  25
   1  -2  19 1470.59 400.412  23
   1  -2  20 10786.3 1115.85  31
   1  -2  20 10795.5 994.978  37
   1  -2  20 12220.0 1459.05  21
   1  -2  21 93.3166 199.524  37
  -1   1  23 19788.4 1075.05  37
  -1   1  22 2877.77 387.121  37
  -1   1  22 3261.51 544.354  21
  -1   1  21 34861.3 1864.57  37
  -1   1  21 37339.0 2203.94  21
  -1   1  20 2650.25 449.154  37
  -1   1  20 2643.46 597.437  21
  -1   1  20 2738.45 621.367  20
  -1   1  19 19082.7 1391.46  37
  -1   1  19 23211.4 1830.14  21
  -1   1  19 16649.3 1656.31  20
  -1   1  19 22024.7 1759.78  26
  -1   1  19 16801.7 1420.09  22
  -1   1  18 2633.63 476.957  37
  -1   1  18 1797.11 561.776  21
  -1   1  18 2411.69 610.124  20
  -1   1  18 1996.21 543.867  26
  -1   1  18 1973.34 489.058  22
  -1   1  17 32202.9 2015.77  37
  -1   1  17 32958.4 2448.82  20
  -1   1  17 34656.2 2459.72  21
  -1   1  17 29479.2 2092.49  22
  -1   1  17 33402.9 2261.61  26
  -1   1  17 33794.5 2121.40  29
  -1   1  16 14619.3 1520.21  20
  -1   1  16 13961.7 1489.91  21
  -1   1  16 17667.8 1479.73  14
  -1   1  16 16527.1 1446.47  26
  -1   1  16 14689.4 1329.34  22
  -1   1  16 16608.3 1349.25  29
  -1   1  16 13657.0 1356.60  34
  -1   1  15 25383.6 2068.56  20
  -1   1  15 30713.2 2082.17  14
  -1   1  15 29828.3 1829.23  16
  -1   1  15 30059.4 1900.58  29
  -1   1  15 27953.7 1986.66  34
  -1   1  15 28677.3 1875.05  28
  -1   1  15 23069.5 1794.64  22
  -1   1  15 26031.2 1759.94  25
  -1   1  14 1775.67 472.787  14
  -1   1  14 1806.86 360.230  36
  -1   1  14 1976.11 412.906  16
  -1   1  14 1886.12 502.593  20
  -1   1  14 1943.13 411.062  29
  -1   1  14 1534.81 403.636  34
  -1   1  14 1811.96 402.302  28
  -1   1  14 2293.81 485.698  30
  -1   1  14 2053.07 414.155  25
  -1   1  14 1978.30 455.252  22
  -1   1  13 52637.4 2736.76  36
  -1   1  13 51577.4 2790.20  16
  -1   1  13 58563.9 3207.05  20
  -1   1  13 61411.1 3197.02  14
  -1   1  13 59684.7 2949.21  29
  -1   1  13 59269.7 2954.80  28
  -1   1  13 55490.1 3018.52  34
  -1   1  13 47939.2 2863.89  22
  -1   1  13 53912.4 2821.64  25
  -1   1  12 42336.6 1721.19  35
  -1   1  12 34804.5 1989.09  36
  -1   1  12 38787.8 2380.23  20
  -1   1  12 39161.0 2175.98  29
  -1   1  12 35665.5 2205.24  34
  -1   1  12 34626.9 2054.39  25
  -1   1  11 6174.86 601.340  36
  -1   1  11 5283.40 660.234  34
  -1   1  10 9479.30 506.377  35
  -1   1  10 9504.48 831.232  34
  -1   1   9 71535.0 2886.80  35
  -1   1   8 56033.4 2278.06  35
  -1   1   7 1237.42 56.8984  38
  -1   1   7 1271.00 134.868  35
  -1   1   7 1172.89 59.0617  11
  -1   1   6 41774.7 1690.38  35
  -1   1   6 41677.7 1659.66  15
   1  -1  -5 19749.9 789.707  32
  -1   1   5 19114.1 844.367  35
   1  -1  -4 4381.73 194.463  32
  -1   1   4 4573.66 232.293  35
   1  -1  -3 2670.95 117.302  32
  -1   1   3 1938.19 125.092  35
   1  -1  -2 5847.24 223.655  32
  -1   1   2 4553.20 223.973  35
   1  -1  -1 99884.8 3250.74  32
  -1   1   1 103510. 3272.98  15
   1  -1   0 111149. 4516.39  32
  -1   1   0 129308. 4529.91  15
   1  -1   1 64634.4 2650.14  35
  -1   1  -1 77419.3 2663.90  15
   1  -1   2 280041. 10166.8  32
   1  -1   2 250014. 10172.4  35
  -1   1  -2 265868. 10160.6  15
   1  -1   3 20608.6 994.826  35
   1  -1   3 29314.6 993.686  32
   1  -1   4 155751. 5817.49  35
   1  -1   4 149321. 5770.39  32
   1  -1   5 16340.2 708.379  35
  -1   1  -5 16173.5 653.830  11
   1  -1   5 16720.2 648.344  32
  -1   1  -6 29324.3 1141.17  11
  -1   1  -7 333.170 25.1338  38
  -1   1  -7 332.459 24.8994  11
   1  -1  11 89346.6 3979.01  37
   1  -1  12 49092.2 2480.59  37
   1  -1  13 35837.2 2031.34  37
   1  -1  13 37650.4 2333.99  21
   1  -1  13 35056.9 2242.42  31
   1  -1  13 39726.1 2461.84  30
   1  -1  13 41676.7 2377.25  27
   1  -1  13 36879.9 2179.94  23
   1  -1  13 36893.3 2205.26  26
   1  -1  13 34316.7 2052.62  25
   1  -1  14 59851.5 3053.27  37
   1  -1  14 61904.6 3414.42  21
   1  -1  14 60768.9 3146.34  29
   1  -1  14 65818.0 3571.21  30
   1  -1  14 59625.9 3322.68  31
   1  -1  14 63530.7 3235.78  23
   1  -1  14 56259.1 3049.91  25
   1  -1  14 61536.4 3246.36  26
   1  -1  15 22428.4 1569.47  37
   1  -1  15 23870.5 2011.63  20
   1  -1  15 24001.5 1864.97  21
   1  -1  15 21216.9 1732.96  31
   1  -1  15 25904.6 1776.50  28
   1  -1  15 24839.0 1680.82  29
   1  -1  15 25741.1 1960.00  30
   1  -1  15 22928.5 1680.68  23
   1  -1  15 23554.8 1726.03  26
   1  -1  15 22063.0 1566.06  25
   1  -1  16 1287.49 354.496  37
   1  -1  16 1559.79 526.785  20
   1  -1  16 1737.37 498.984  21
   1  -1  16 819.524 386.645  31
   1  -1  16 1192.10 349.851  29
   1  -1  16 1220.47 377.377  28
   1  -1  16 1690.86 497.787  30
   1  -1  16 1564.24 417.287  23
   1  -1  16 1085.46 379.376  26
   1  -1  16 1145.50 345.769  25
   1  -1  17 50612.4 2853.83  37
   1  -1  17 52643.3 3435.51  20
   1  -1  17 59490.1 3326.58  21
   1  -1  17 61747.8 3416.35  30
   1  -1  17 49486.2 2880.81  29
   1  -1  17 53873.1 3046.01  28
   1  -1  17 48720.0 3038.62  31
   1  -1  17 52950.6 2874.34  25
   1  -1  17 54294.3 3140.72  22
   1  -1  17 59138.2 3108.31  23
   1  -1  17 53497.6 3064.03  26
   1  -1  18 4820.19 650.543  37
   1  -1  18 4536.93 873.315  20
   1  -1  18 6239.00 888.841  21
   1  -1  18 5700.33 779.032  28
   1  -1  18 4174.18 635.186  29
   1  -1  18 5055.51 828.574  30
   1  -1  18 5216.42 779.637  31
   1  -1  18 4800.95 640.398  25
   1  -1  18 3957.96 716.351  22
   1  -1  18 5070.01 725.134  23
   1  -1  18 4535.15 717.957  26
   1  -1  19 15190.6 1240.78  37
   1  -1  19 18467.5 1537.81  21
   1  -1  19 17334.9 1692.47  20
   1  -1  19 16405.4 1335.82  28
   1  -1  19 15571.5 1472.45  30
   1  -1  19 17458.3 1321.77  29
   1  -1  19 16387.4 1460.85  22
   1  -1  19 16941.3 1265.98  25
   1  -1  19 14433.8 1321.26  26
   1  -1  20 1291.41 335.242  37
   1  -1  20 788.886 499.542  20
   1  -1  20 1161.76 323.897  25
   1  -1  20 1085.23 345.665  26
   1  -1  20 1254.21 394.321  22
   1  -1  20 906.380 296.141  28
   1  -1  20 1015.71 292.010  29
   1  -1  21 18653.0 1264.63  37
   1  -1  22 5029.73 545.936  37
  -1   0  23 4147.22 437.623  37
  -1   0  23 4418.75 840.963  21
  -1   0  22 21919.6 1347.98  37
  -1   0  22 20600.6 1599.80  20
  -1   0  22 22886.0 1632.33  21
  -1   0  21 283.954 655.745  25
  -1   0  21 263.712 206.270  22
  -1   0  21 161.684 265.875  20
  -1   0  21 334.908 306.992  21
  -1   0  20 15203.1 1309.45  22
  -1   0  20 15885.6 1312.14  25
  -1   0  20 16538.8 1502.64  21
  -1   0  20 12719.8 1413.56  20
  -1   0  19 6135.72 766.713  25
  -1   0  19 5644.09 802.803  22
  -1   0  19 6824.68 997.245  26
  -1   0  19 5162.49 918.024  20
  -1   0  19 6644.74 955.185  21
  -1   0  18 38068.4 2810.57  20
  -1   0  18 42221.8 2829.27  21
  -1   0  18 41194.4 2571.14  26
  -1   0  18 41699.1 2579.60  22
  -1   0  18 42057.5 2429.88  25
  -1   0  18 38141.3 2546.65  34
  -1   0  18 41645.0 2392.62  29
  -1   0  17 7334.10 1034.96  21
  -1   0  17 7522.69 940.414  26
  -1   0  17 6520.17 895.580  22
  -1   0  17 7655.86 852.457  25
  -1   0  17 6618.35 824.861  31
  -1   0  17 7712.56 902.964  30
  -1   0  17 5824.94 842.331  34
  -1   0  17 5932.70 750.091  28
  -1   0  17 5937.63 759.691  29
  -1   0  16 26857.6 2074.38  21
  -1   0  16 30337.6 1994.20  14
  -1   0  16 27994.2 1907.20  30
  -1   0  16 25336.5 1885.91  34
  -1   0  16 24546.4 1689.82  29
  -1   0  16 23776.0 1674.76  28
  -1   0  16 23107.1 1732.44  31
  -1   0  16 22956.2 1778.39  26
  -1   0  16 22201.4 1769.60  22
  -1   0  16 23101.5 1678.73  25
  -1   0  15 6830.04 489.132  35
  -1   0  15 6734.27 941.020  21
  -1   0  15 7269.88 897.541  14
  -1   0  15 6108.79 804.306  34
  -1   0  15 7471.85 886.589  30
  -1   0  15 5203.03 745.473  31
  -1   0  15 5422.35 702.327  29
  -1   0  15 6805.41 778.352  28
  -1   0  15 6146.45 821.839  22
  -1   0  15 6711.25 836.204  26
  -1   0  15 5791.78 722.518  25
  -1   0  14 36524.1 1567.49  35
  -1   0  14 37080.3 2277.62  14
  -1   0  14 38826.9 2246.41  30
  -1   0  14 33528.9 2013.83  28
  -1   0  14 27152.1 1982.13  31
  -1   0  14 31867.3 2115.81  34
  -1   0  14 33396.0 2000.57  29
  -1   0  14 36495.0 2170.08  26
  -1   0  14 30421.6 2085.24  22
  -1   0  14 28447.0 1923.54  25
  -1   0  13 18385.7 1406.97  34
  -1   0  13 17605.5 1290.46  29
  -1   0  13 18392.6 1409.04  26
  -1   0  13 17374.3 1288.74  25
  -1   0  13 16478.5 1388.46  22
  -1   0  13 17196.3 1242.80  36
  -1   0  13 22388.2 993.745  35
  -1   0  12 7111.25 777.376  34
  -1   0  12 7476.37 709.353  36
  -1   0  12 9057.55 530.009  35
  -1   0  11 17385.7 1289.44  34
  -1   0  11 16380.7 1143.59  36
  -1   0  10 11688.8 601.824  35
  -1   0   9 23472.9 1036.71  35
  -1   0   8 13315.3 625.590  35
  -1   0   7 30964.5 1283.95  35
   1   0  -6 139302. 5399.88  32
  -1   0   6 159313. 5489.74  35
  -1   0   5 13550.6 580.402  35
  -1   0   4 131671. 4985.13  11
  -1   0   4 127121. 5012.73  35
  -1   0   3 149164. 5427.86  11
  -1   0   3 131478. 5437.98  35
  -1   0   2 78896.9 3027.18   2
   1   0  -1 395258. 15074.8  38
  -1   0   0 119811. 4074.28   2
  -1   0   0 119575. 4072.06  11
  -1   0  -1 138012. 5280.74  11
  -1   0  -2 403764. 15404.4  11
  -1   0  -3 4902.23 209.387  11
  -1   0  -4 1108.86 62.8118  11
   1   0   5 14233.1 556.179  32
   1   0   6 10794.9 543.733  35
   1   0   6 11184.9 465.480  15
  -1   0  -6 12489.9 494.420   2
   1   0   6 11849.2 453.939  32
   1   0   7 5636.64 328.077  35
  -1   0  -7 5755.88 264.036   2
   1   0   8 3396.49 242.573  35
  -1   0  -8 3050.52 161.670   2
   1   0   9 66557.9 2705.39  35
   1   0  10 6406.52 406.068  35
   1   0  11 38973.3 2212.70  34
   1   0  12 1952.77 345.712  37
   1   0  12 2023.47 484.200  20
   1   0  12 2266.93 441.867  34
   1   0  12 2363.05 420.198  29
   1   0  12 2079.60 481.945  30
   1   0  12 2063.66 404.002  25
   1   0  12 2340.84 450.665  26
   1   0  12 2259.76 447.739  22
   1   0  13 16862.6 1213.51  37
   1   0  13 17186.3 1527.64  20
   1   0  13 18888.7 1500.66  21
   1   0  13 17409.4 1405.25  34
   1   0  13 16922.2 1327.77  29
   1   0  13 18838.6 1423.49  28
   1   0  13 20514.5 1616.54  30
   1   0  13 15722.4 1338.47  31
   1   0  13 17767.2 1342.34  23
   1   0  13 18535.5 1435.24  26
   1   0  13 15813.8 1282.58  25
   1   0  13 17843.9 1399.16  22
   1   0  14 3387.76 504.357  37
   1   0  14 3442.65 636.674  21
   1   0  14 4085.86 724.506  20
   1   0  14 3659.34 599.785  28
   1   0  14 2640.60 506.574  29
   1   0  14 3307.04 645.464  30
   1   0  14 3531.33 605.737  31
   1   0  14 3627.39 612.339  34
   1   0  14 3535.76 606.672  26
   1   0  14 5851.31 714.433  23
   1   0  14 3066.37 570.730  22
   1   0  14 2766.19 512.645  25
   1   0  15 10217.1 967.281  37
   1   0  15 12098.6 1252.18  21
   1   0  15 10206.1 1241.94  20
   1   0  15 10892.4 1067.25  29
   1   0  15 11056.8 1167.44  34
   1   0  15 12231.7 1305.30  30
   1   0  15 11008.6 1131.17  31
   1   0  15 11133.4 1124.19  28
   1   0  15 11218.0 1124.47  22
   1   0  15 12938.0 1156.85  23
   1   0  15 11651.9 1160.28  26
   1   0  15 10431.4 1038.67  25
   1   0  16 1970.60 411.434  37
   1   0  16 2496.03 580.002  21
   1   0  16 1567.37 518.300  20
   1   0  16 1465.03 470.596  30
   1   0  16 2254.30 492.880  29
   1   0  16 1890.87 484.437  34
   1   0  16 2197.54 498.703  31
   1   0  16 1860.70 469.747  28
   1   0  16 1938.78 508.495  26
   1   0  16 2435.32 481.305  25
   1   0  16 1566.17 439.987  22
   1   0  17 21242.0 1543.86  37
   1   0  17 19715.1 1854.72  20
   1   0  17 21861.6 1808.54  21
   1   0  17 19369.4 1624.18  31
   1   0  17 23745.0 1911.59  30
   1   0  17 21596.2 1757.30  34
   1   0  17 23979.2 1699.33  29
   1   0  17 22867.4 1732.38  28
   1   0  17 23110.6 1743.44  22
   1   0  17 22974.1 1634.19  25
   1   0  17 23838.6 1792.13  26
   1   0  18 2630.71 478.986  37
   1   0  18 1630.31 558.920  20
   1   0  18 1990.44 549.313  21
   1   0  18 3275.19 646.266  30
   1   0  18 2902.49 592.070  34
   1   0  18 3684.69 616.748  28
   1   0  18 2548.49 507.866  29
   1   0  18 2482.11 545.994  22
   1   0  18 3155.44 530.745  25
   1   0  18 2675.85 578.208  26
   1   0  19 19889.0 1408.07  37
   1   0  19 14643.1 1567.35  20
   1   0  19 22230.8 1700.93  21
   1   0  19 22126.1 1563.54  28
   1   0  19 19890.8 1485.25  29
   1   0  19 20619.2 1594.17  26
   1   0  19 19892.8 1571.00  22
   1   0  19 20607.6 1459.09  25
   1   0  20 13320.5 1078.03  37
   1   0  20 11407.1 1334.54  20
   1   0  20 15758.7 1280.37  26
   1   0  20 15888.6 1168.43  25
   1   0  20 14595.2 1150.92  29
   1   0  21 14661.5 1089.55  37
   1   0  21 17376.1 1326.33  26
   1   0  21 18860.0 1212.07  25
   1   0  22 4486.51 487.432  37
  -1  -1  23 10639.1 772.078  37
  -1  -1  23 11139.8 1214.55  21
  -1  -1  23 9651.97 842.342  22
  -1  -1  22 7644.50 708.909  37
  -1  -1  22 7885.89 1153.19  21
  -1  -1  22 7333.85 807.371  22
  -1  -1  21 3458.86 502.467  37
  -1  -1  21 3993.94 792.630  21
  -1  -1  21 2994.12 556.048  22
  -1  -1  20 15328.4 1239.43  37
  -1  -1  20 15391.2 1537.26  20
  -1  -1  20 15287.1 1496.49  21
  -1  -1  20 16101.2 1382.35  34
  -1  -1  20 15910.2 1397.35  22
  -1  -1  20 17992.2 1452.50  25
  -1  -1  19 9322.53 941.152  37
  -1  -1  19 10410.1 1224.97  21
  -1  -1  19 7915.68 1127.56  20
  -1  -1  19 9534.27 1077.43  34
  -1  -1  19 9965.56 1064.34  25
  -1  -1  19 8576.38 1025.35  22
  -1  -1  18 8993.54 936.619  37
  -1  -1  18 10485.1 1232.77  21
  -1  -1  18 8563.24 1183.17  20
  -1  -1  18 9306.52 899.711  29
  -1  -1  18 9563.53 1073.40  34
  -1  -1  18 9448.42 1055.38  31
  -1  -1  18 9086.29 1043.40  26
  -1  -1  18 8799.63 1059.75  22
  -1  -1  18 9471.31 960.135  25
  -1  -1  17 28667.0 1366.74  35
  -1  -1  17 28375.0 1837.90  37
  -1  -1  17 25978.3 2136.31  20
  -1  -1  17 26972.5 2143.71  21
  -1  -1  17 22722.6 1868.14  31
  -1  -1  17 25071.6 1705.81  28
  -1  -1  17 28708.3 1975.46  30
  -1  -1  17 27025.4 1956.25  34
  -1  -1  17 25664.7 1707.79  29
  -1  -1  17 27052.0 1797.16  25
  -1  -1  17 29985.6 1854.98  23
  -1  -1  17 25759.7 1867.07  26
  -1  -1  16 20463.0 1449.90  37
  -1  -1  16 20527.3 1042.47  35
  -1  -1  16 20719.5 1755.59  21
  -1  -1  16 19676.1 1784.30  20
  -1  -1  16 17583.1 1550.85  31
  -1  -1  16 16691.7 1312.12  29
  -1  -1  16 21677.0 1637.09  30
  -1  -1  16 19605.6 1600.07  34
  -1  -1  16 17667.9 1369.91  28
  -1  -1  16 17218.7 1379.11  25
  -1  -1  16 17644.1 1462.82  26
  -1  -1  16 21492.7 1493.81  23
  -1  -1  15 59478.7 2382.33  35
  -1  -1  15 55373.9 2861.53  37
  -1  -1  15 61594.1 3224.68  14
  -1  -1  15 57575.3 3287.75  21
  -1  -1  15 51793.6 3214.85  20
  -1  -1  15 45584.8 2947.53  31
  -1  -1  15 56568.7 3067.76  34
  -1  -1  15 51713.9 2816.38  28
  -1  -1  15 46800.2 2706.58  29
  -1  -1  15 60696.2 3157.30  30
  -1  -1  15 52292.4 2924.17  26
  -1  -1  15 48366.0 2769.59  25
  -1  -1  15 53219.1 2866.15  23
  -1  -1  14 40640.1 1611.45  35
  -1  -1  14 35304.8 2170.51  34
  -1  -1  14 33493.6 2300.61  20
  -1  -1  14 32717.8 2258.31  21
  -1  -1  14 37184.2 2282.49  14
  -1  -1  14 27023.1 2042.66  31
  -1  -1  14 31318.1 1896.33  29
  -1  -1  14 35028.7 2179.10  30
  -1  -1  14 34064.1 1975.18  28
  -1  -1  14 30582.6 2007.00  26
  -1  -1  14 30166.9 1914.02  25
  -1  -1  14 30886.4 1958.93  23
  -1  -1  13 4186.62 336.410  35
  -1  -1  13 3950.17 661.984  20
  -1  -1  13 2882.68 455.216  25
  -1  -1  12 17069.5 1226.68  36
  -1  -1  12 22439.9 1006.68  35
  -1  -1  11 1564.73 282.825  36
  -1  -1  11 2142.04 201.463  35
  -1  -1  10 20574.8 941.606  35
  -1  -1   9 2802.62 211.977  35
  -1  -1   8 2881.76 198.357  35
  -1  -1   8 2626.51 138.528  18
   1   1  -7 892.415 57.3369  38
  -1  -1   7 1090.75 106.572  35
  -1  -1   6 48624.9 1802.65  35
   1   1  -6 43736.9 1741.37  38
  -1  -1   5 95864.0 3400.26  35
   1   1  -5 83663.2 3358.91  38
   1   1  -4 593.525 50.0032  38
  -1  -1   4 515.118 55.1781   2
   1   1  -3 56987.4 2274.27  38
  -1  -1   3 61855.0 2291.98   2
   1   1  -2 370798. 14157.4  38
   1   1  -1 128067. 5010.22  38
  -1  -1   1 134100. 5019.28   2
  -1  -1   0 126825. 4869.47   2
  -1  -1  -1 93354.9 3594.20   2
   1   1   2 473610. 17812.5  38
  -1  -1  -2 459016. 17816.3   2
   1   1   3 277123. 10857.5  38
  -1  -1  -3 293423. 10867.3   2
   1   1   4 480735. 18810.0  38
  -1  -1  -4 510027. 18822.4   2
   1   1   5 20545.4 864.521  38
  -1  -1  -5 24635.6 885.758   2
  -1  -1  -6 544966. 19662.8  18
   1   1   6 479504. 19674.9  15
  -1  -1  -6 513422. 19649.9   2
   1   1   7 10648.2 497.244  15
  -1  -1  -7 12035.4 481.669   2
   1   1   8 341357. 13064.8  15
   1   1  10 11190.0 943.905  34
   1   1  10 9736.99 760.048  36
   1   1  11 1650.33 375.132  34
   1   1  12 1398.34 412.724  20
   1   1  12 1399.41 364.849  22
   1   1  12 1623.67 364.422  23
   1   1  12 1546.24 384.016  34
   1   1  12 2286.87 504.859  30
   1   1  12 1751.75 406.385  28
   1   1  13 15277.3 1431.28  20
   1   1  13 15498.9 1440.38  21
   1   1  13 14208.0 1151.12  16
   1   1  13 17668.8 1418.25  28
   1   1  13 20010.5 1629.44  30
   1   1  13 17682.9 1434.92  34
   1   1  13 17373.7 1360.97  31
   1   1  13 16683.6 1352.45  22
   1   1  14 2349.47 419.594  37
   1   1  14 2081.53 534.482  20
   1   1  14 1725.71 367.737  16
   1   1  14 1863.26 501.300  21
   1   1  14 2693.33 552.474  34
   1   1  14 2995.06 638.231  30
   1   1  14 3044.92 555.009  28
   1   1  14 2499.82 507.570  22
   1   1  15 500.127 219.048  37
   1   1  15 477.618 326.936  20
   1   1  15 474.386 227.559  16
   1   1  15-56.1724 255.256  21
   1   1  15 634.350 331.631  34
   1   1  15 845.468 326.532  28
   1   1  15 793.304 364.068  30
   1   1  15 273.091 249.467  22
   1   1  16 407.744 221.626  37
   1   1  16 616.048 357.810  20
   1   1  16 517.275 351.896  21
   1   1  16 365.259 213.684  16
   1   1  16 1009.76 352.447  28
   1   1  16 108.829 197.637  34
   1   1  16 605.403 292.331  29
   1   1  16 982.996 339.135  22
   1   1  17 517.820 237.665  37
   1   1  17 428.092 334.805  20
   1   1  17 679.318 371.510  21
   1   1  17 197.216 213.689  28
   1   1  17 508.787 283.215  29
   1   1  17 185.130 228.643  22
   1   1  17 513.955 293.179  25
   1   1  18 3285.81 527.307  37
   1   1  18 3666.06 689.364  21
   1   1  18 3371.04 694.535  20
   1   1  18 4345.72 651.777  29
   1   1  18 3737.55 630.296  22
   1   1  18 4905.06 668.924  25
   1   1  19 673.822 237.315  37
   1   1  19 282.690 281.692  21
   1   1  19 261.489 351.029  20
   1   1  19 686.143 271.373  25
   1   1  19 950.472 321.134  29
   1   1  20 13445.2 1027.38  37
   1   1  20 14127.0 1095.55  25
   1   1  20 15991.1 1270.89  26
   1   1  21 221.702 151.844  37
   1   1  21 272.300 211.576  25
   1   1  22 17478.1 1067.90  37
   1   1  22 22813.4 1220.24  25
  -1  -2  23 6041.64 872.349  20
  -1  -2  22 430.334 180.592  37
  -1  -2  22 338.024 295.736  20
  -1  -2  21 10540.5 1035.75  34
  -1  -2  21 9499.88 871.824  37
  -1  -2  21 9714.62 1176.07  20
  -1  -2  21 13324.8 1573.57  21
  -1  -2  20 6926.12 893.074  31
  -1  -2  20 8145.52 947.376  34
  -1  -2  20 8228.94 828.845  37
  -1  -2  20 7562.06 1175.14  21
  -1  -2  20 6947.63 1033.71  20
  -1  -2  19 45494.7 2327.71  37
  -1  -2  19 37772.5 2675.64  20
  -1  -2  19 43153.6 2731.52  21
  -1  -2  19 38130.2 2447.45  31
  -1  -2  19 41338.8 2471.91  34
  -1  -2  19 40556.5 2454.72  22
  -1  -2  18 13050.0 1148.07  37
  -1  -2  18 14158.2 825.305  35
  -1  -2  18 14451.6 1544.65  20
  -1  -2  18 15585.4 1531.90  21
  -1  -2  18 11874.4 1286.26  31
  -1  -2  18 13701.7 1298.01  34
  -1  -2  18 12360.1 1157.91  23
  -1  -2  18 14829.7 1307.97  25
  -1  -2  18 12068.4 1251.64  22
  -1  -2  17 133967. 5843.12  37
  -1  -2  17 141396. 5272.09  35
  -1  -2  17 131597. 6356.62  21
  -1  -2  17 120744. 6247.68  19
  -1  -2  17 127600. 6392.34  20
  -1  -2  17 135180. 6111.24  34
  -1  -2  17 110178. 5530.81  29
  -1  -2  17 142900. 6143.08  30
  -1  -2  17 122711. 6124.31  31
  -1  -2  17 117111. 5793.22  26
  -1  -2  17 122361. 6007.39  22
  -1  -2  17 127817. 5874.92  23
  -1  -2  17 126057. 5749.43  25
  -1  -2  16 2749.53 306.875  35
  -1  -2  16 2347.43 452.723  37
  -1  -2  16 2679.81 636.051  19
  -1  -2  16 2826.91 638.611  21
  -1  -2  16 2147.15 599.344  20
  -1  -2  16 2884.41 561.735  30
  -1  -2  16 2225.00 394.740  29
  -1  -2  16 2371.29 529.376  34
  -1  -2  16 2296.71 562.367  31
  -1  -2  16 2431.61 483.987  23
  -1  -2  16 2482.97 536.616  22
  -1  -2  16 2361.51 476.885  26
  -1  -2  16 2075.63 458.345  25
  -1  -2  15 83569.3 3147.31  35
  -1  -2  15 75678.2 3603.83  37
  -1  -2  15 76571.6 4072.08  21
  -1  -2  15 70464.0 4118.62  19
  -1  -2  15 70340.6 4008.51  20
  -1  -2  15 66440.4 3855.57  31
  -1  -2  15 67559.3 3416.17  29
  -1  -2  15 75921.6 3878.95  30
  -1  -2  15 70708.1 3778.36  22
  -1  -2  15 70415.4 3538.31  25
  -1  -2  15 71499.6 3690.14  23
  -1  -2  15 67842.9 3598.42  26
  -1  -2  14 3394.01 309.508  35
  -1  -2  14 3449.33 485.632  37
  -1  -2  14 2462.70 612.539  19
  -1  -2  14 3291.24 643.569  20
  -1  -2  14 2960.95 609.894  21
  -1  -2  14 2682.15 558.276  31
  -1  -2  14 3084.28 566.322  30
  -1  -2  14 2996.17 483.009  26
  -1  -2  14 2671.14 493.959  23
  -1  -2  14 3153.19 560.802  22
  -1  -2  14 2980.24 452.083  25
  -1  -2  13 22439.3 1005.51  35
  -1  -2  13 19092.7 1285.38  37
  -1  -2  13 22994.7 1687.47  20
  -1  -2  13 16954.4 1388.03  22
  -1  -2  13 17696.0 1254.36  25
  -1  -2  13 16509.8 1459.74  31
  -1  -2  12 1268.04 264.559  37
  -1  -2  12 1497.17 177.107  35
  -1  -2  11 18016.9 855.018  35
  -1  -2  10 14268.2 611.535  35
  -1  -2  10 10636.1 494.798  18
   1   2  -9 25725.5 1084.10  38
  -1  -2   9 28168.6 1128.84  18
  -1  -2   8 4404.73 273.298  35
   1   2  -8 4903.48 224.309  38
  -1  -2   8 4153.92 253.144  18
  -1  -2   7 735.173 92.4601  35
   1   2  -7 555.448 59.5978  38
   1   2  -6 2447.97 138.333  38
   1   2  -5 12142.2 513.251  38
   1   2  -4 15787.5 651.221  38
   1   2  -3 35689.3 1409.64  38
   1   2  -2 27669.8 1088.67  38
  -1  -2   2 26738.5 1109.80   2
   1   2  -1 16767.1 673.607  38
  -1  -2   1 15919.9 691.296   2
  -1  -2   0 848.534 81.2876   2
   1   2   1 389852. 14859.0  38
  -1  -2  -1 387180. 14877.3   2
   1   2   2 263.119 43.1630  38
  -1  -2  -2 308.225 49.0627   2
   1   2   3 225368. 8616.20  38
  -1  -2  -3 224186. 8634.16   2
   1   2   4 26067.6 1078.65  38
  -1  -2  -4 28501.0 1099.69   2
   1   2   5 248919. 9880.12  38
  -1  -2  -5 280217. 9956.69  18
  -1  -2  -5 259146. 9901.59   2
   1   2   6 13411.5 585.409  38
  -1  -2  -6 15438.5 646.286  18
   1   2   6 12923.9 651.390  15
  -1  -2  -6 15536.8 611.697   2
  -1  -2  -7 416142. 14139.3  18
   1   2   7 372771. 14158.9  15
  -1  -2  -7 417891. 14111.0   2
   1   2   8 15059.4 677.766  15
   1   2   9 169228. 7299.00  34
   1   2   9 158915. 6974.73  36
   1   2   9 173596. 6611.12  15
   1   2  10 18616.7 1181.06  36
   1   2  10 20532.8 1445.88  34
   1   2  11 70206.0 3495.02  26
   1   2  11 58454.3 3275.07  25
   1   2  11 76546.7 3781.81  30
   1   2  11 69652.9 3357.04  29
   1   2  11 64006.9 3432.27  34
   1   2  12 23028.9 1732.95  20
   1   2  12 27246.6 1799.29  26
   1   2  12 21993.6 1593.58  25
   1   2  12 21428.0 1557.31  22
   1   2  12 26862.9 1688.64  29
   1   2  12 23758.1 1870.85  30
   1   2  12 21315.0 1671.17  34
   1   2  13 14662.1 1234.81  16
   1   2  13 16179.9 1443.15  20
   1   2  13 16768.1 1420.81  28
   1   2  13 19293.9 1408.81  29
   1   2  13 15387.7 1296.82  25
   1   2  13 18287.6 1470.73  26
   1   2  13 15308.5 1298.34  22
   1   2  14 3287.65 498.825  37
   1   2  14 3491.05 705.344  21
   1   2  14 3273.13 534.309  16
   1   2  14 2725.57 599.266  20
   1   2  14 4379.45 648.556  29
   1   2  14 4172.41 675.845  28
   1   2  14 3524.39 599.719  22
   1   2  14 3029.74 587.226  26
   1   2  14 3738.84 603.174  25
   1   2  15 838.517 262.808  37
   1   2  15 693.428 379.725  21
   1   2  15 648.322 277.018  16
   1   2  15 331.735 283.928  20
   1   2  15 711.287 286.164  29
   1   2  15 616.462 290.656  28
   1   2  15 820.353 344.325  26
   1   2  15 511.015 274.212  25
   1   2  15 689.649 301.519  22
   1   2  16 1835.15 395.913  37
   1   2  16 2222.67 440.326  16
   1   2  16 2523.08 582.832  21
   1   2  16 1324.49 448.687  20
   1   2  16 3527.34 588.985  29
   1   2  16 2514.10 494.029  25
   1   2  16 2876.26 594.111  26
   1   2  16 2868.24 540.470  22
   1   2  17 614.440 229.600  37
   1   2  17 367.512 269.406  20
   1   2  17 435.964 342.096  21
   1   2  17 914.742 313.084  25
   1   2  17 398.034 297.266  26
   1   2  18 94.2302 121.622  37
   1   2  18 196.858 269.239  21
   1   2  18 460.179 288.407  26
   1   2  19 546.904 195.530  37
   1   2  19 647.557 288.395  26
   1   2  20 357.240 167.809  37
   1   2  20 437.849 385.565  26
   1   2  21 5405.78 483.515  37
  -1  -3  23 2192.28 404.385  22
  -1  -3  22 4558.34 787.513  20
  -1  -3  22 5243.34 642.464  34
  -1  -3  22 6277.69 725.152  22
  -1  -3  21 1522.65 325.121  37
  -1  -3  21 1274.21 444.560  20
  -1  -3  21 1825.49 421.789  34
  -1  -3  21 1129.02 369.457  31
  -1  -3  21 952.574 343.487  22
  -1  -3  20 30218.9 1782.34  37
  -1  -3  20 29022.7 2233.34  20
  -1  -3  20 32560.5 2552.45  21
  -1  -3  20 28101.6 1955.11  34
  -1  -3  20 29692.1 2084.93  31
  -1  -3  20 27323.9 1972.20  22
  -1  -3  19 4940.95 633.228  37
  -1  -3  19 5232.86 1351.69  21
  -1  -3  19 4864.16 872.896  20
  -1  -3  19 5071.88 742.108  34
  -1  -3  19 4543.99 782.008  31
  -1  -3  19 5212.19 715.777  23
  -1  -3  19 4608.51 747.193  22
  -1  -3  18 51041.7 2701.29  37
  -1  -3  18 49522.8 3259.97  21
  -1  -3  18 48855.9 3218.74  20
  -1  -3  18 50218.3 3110.84  31
  -1  -3  18 50140.1 2969.10  34
  -1  -3  18 51848.5 2883.59  23
  -1  -3  18 48887.0 2944.48  22
  -1  -3  17 143.324 155.114  37
  -1  -3  17 639.682 630.775  21
  -1  -3  17 72.4392 280.255  19
  -1  -3  17 330.141 349.747  20
  -1  -3  17 179.012 282.738  31
  -1  -3  17 547.731 280.824  34
  -1  -3  17 197.915 214.075  30
  -1  -3  17 152.529 260.228  22
  -1  -3  17 134.968 230.295  23
  -1  -3  16 60103.5 2808.23  37
  -1  -3  16 61327.7 3593.49  19
  -1  -3  16 60493.0 3382.14  20
  -1  -3  16 57800.6 3324.08  21
  -1  -3  16 53196.8 3171.46  31
  -1  -3  16 60127.2 3141.95  30
  -1  -3  16 59218.8 3089.10  22
  -1  -3  16 55235.8 2980.21  23
  -1  -3  15 910.199 274.235  37
  -1  -3  15 936.913 440.942  21
  -1  -3  15 1524.68 527.311  19
  -1  -3  15 1404.05 468.685  20
  -1  -3  15 1064.66 422.159  31
  -1  -3  15 1480.85 430.763  30
  -1  -3  15 959.412 329.811  23
  -1  -3  15 2260.84 604.370  25
  -1  -3  15 1568.47 434.866  22
  -1  -3  14 67011.0 3207.65  37
  -1  -3  14 67927.5 3700.40  21
  -1  -3  14 73878.2 3776.93  20
  -1  -3  14 69883.5 4017.25  19
  -1  -3  14 62825.1 3608.21  31
  -1  -3  14 65205.2 3195.78  25
  -1  -3  14 57613.8 3355.51  23
  -1  -3  14 65466.2 3450.09  22
  -1  -3  13 24060.6 1441.13  37
  -1  -3  13 25282.9 1812.54  20
  -1  -3  13 26042.4 2083.96  19
  -1  -3  13 22612.5 1441.14  25
  -1  -3  13 24810.6 1662.75  22
  -1  -3  13 18209.2 1508.13  23
  -1  -3  13 22036.4 1723.92  31
  -1  -3  12 38979.9 2027.84  37
  -1  -3  11 3438.27 450.226  33
   1   3 -10 47384.7 1848.83  38
  -1  -3  10 45320.2 1906.43  18
   1   3  -9 80.2560 41.3212  38
  -1  -3   9 27.8151 62.3105  18
   1   3  -8 167408. 6386.78  38
  -1  -3   8 162190. 6454.47  18
   1   3  -7 1191.71 106.155  38
  -1  -3   7 1405.24 154.054  18
   1   3  -6 93826.9 3648.02  38
  -1  -3   6 93711.1 3734.61  18
   1   3  -5 321.659 56.3261  38
   1   3  -4 21862.0 903.936  38
   1   3  -3 41075.1 1636.56  38
   1   3  -2 41049.4 1635.17  38
   1   3  -1 2339.66 145.340  38
  -1  -3   1 2254.02 168.672   2
  -1  -3   0 524.453 78.0897   2
   1   3   1 882.990 84.2143  38
  -1  -3  -1 761.514 91.8094   2
   1   3   2 10425.0 466.058  38
  -1  -3  -2 10398.5 488.590   2
   1   3   3 223926. 8699.17  38
  -1  -3  -3 235438. 8801.07  18
  -1  -3  -3 224897. 8725.23   2
   1   3   4 156423. 6085.87  38
  -1  -3  -4 165154. 6188.71  18
  -1  -3  -4 155748. 6111.30   2
   1   3   5 102739. 4060.04  38
  -1  -3  -5 109474. 4159.18  18
   1   3   6 75233.1 2968.66  38
   1   3   6 71770.3 3070.12  15
  -1  -3  -6 82344.6 3066.61  18
   1   3   7 102411. 4120.46  38
   1   3   7 103994. 4222.20  15
   1   3   8 13562.2 896.714  36
   1   3   8 14768.9 698.546  15
   1   3   9 79472.4 3645.55  36
   1   3   9 83301.4 3304.99  15
   1   3   9 92575.0 3963.71  29
   1   3   9 86587.3 4013.71  28
   1   3   9 74113.7 3875.48  25
   1   3  10 69925.2 3286.93  36
   1   3  10 68712.7 2871.23  15
   1   3  10 88429.9 3815.29  26
   1   3  10 69166.0 3560.87  25
   1   3  10 82361.8 3638.97  29
   1   3  10 79703.0 3704.78  28
   1   3  11 27785.9 1868.37  26
   1   3  11 25134.1 1755.68  25
   1   3  11 28978.9 1806.27  29
   1   3  11 26799.8 1851.56  28
   1   3  12 19780.0 1560.55  26
   1   3  12 18278.9 1450.55  25
   1   3  12 20954.3 1523.60  29
   1   3  13 3637.38 634.882  20
   1   3  13 3489.86 576.525  16
   1   3  13 4902.12 681.975  29
   1   3  13 4484.59 673.541  25
   1   3  13 3524.83 638.701  26
   1   3  14 4981.65 612.620  37
   1   3  14 3692.80 643.059  20
   1   3  14 5122.75 700.910  16
   1   3  14 5484.01 741.118  29
   1   3  14 5688.43 808.513  26
   1   3  14 5754.06 754.500  25
   1   3  15 2885.76 458.922  37
   1   3  15 2546.93 615.759  21
   1   3  15 1714.75 429.040  16
   1   3  15 2729.61 549.147  29
   1   3  15 2396.62 544.404  26
   1   3  15 3812.47 610.913  25
   1   3  16 2679.42 448.820  37
   1   3  16 3798.24 707.339  21
   1   3  16 2453.88 484.020  16
   1   3  16 3546.95 593.660  29
   1   3  16 3417.67 570.705  25
   1   3  16 2920.36 581.667  26
   1   3  17 1994.19 375.535  37
   1   3  17 2397.36 531.725  21
   1   3  17 2638.03 489.758  25
   1   3  17 2347.56 510.977  26
   1   3  18 9591.05 803.778  37
   1   3  18 9559.18 1016.99  21
   1   3  18 10313.2 916.949  25
   1   3  18 10261.5 1011.63  26
   1   3  19 11582.0 1028.10  26
   1   3  19 11339.0 881.184  25
   1   3  19 8841.47 728.340  37
   1   3  20 2884.28 381.006  25
   1   3  20 2148.63 280.440  37
  -1  -4  23 3288.10 472.183  22
  -1  -4  22 263.295 211.134  22
  -1  -4  22 62.2481 120.470  34
  -1  -4  22 181.153 178.685  31
  -1  -4  21 3899.04 759.639  20
  -1  -4  21 4770.96 665.038  22
  -1  -4  21 4868.41 729.404  31
  -1  -4  21 4687.21 639.610  34
  -1  -4  20 286.639 314.031  20
  -1  -4  20 843.061 374.772  31
  -1  -4  20 255.574 226.246  34
  -1  -4  20 635.734 261.311  23
  -1  -4  20 485.810 308.412  22
  -1  -4  19 8245.40 781.419  37
  -1  -4  19 7415.96 1041.85  20
  -1  -4  19 8546.61 948.135  34
  -1  -4  19 9613.46 1131.26  31
  -1  -4  19 7590.89 934.215  22
  -1  -4  19 7085.01 872.049  23
  -1  -4  18 474.929 198.931  37
  -1  -4  18 349.971 138.783  35
  -1  -4  18 447.348 349.837  20
  -1  -4  18 369.764 326.688  31
  -1  -4  18 337.012 218.823  34
  -1  -4  18 827.189 308.181  23
  -1  -4  18 149.297 226.160  22
  -1  -4  17 8761.47 835.001  37
  -1  -4  17 10287.5 664.710  35
  -1  -4  17 9631.84 1751.34  21
  -1  -4  17 8349.24 1139.57  20
  -1  -4  17 9473.03 1332.69  19
  -1  -4  17 8981.11 1166.36  31
  -1  -4  17 8826.10 1046.29  30
  -1  -4  17 9952.76 1084.94  22
  -1  -4  17 7071.05 918.637  23
  -1  -4  16 6008.29 672.458  37
  -1  -4  16 6661.19 503.656  35
  -1  -4  16 4935.63 1489.48  21
  -1  -4  16 6603.87 985.678  20
  -1  -4  16 6745.93 1140.19  19
  -1  -4  16 7454.13 923.694  30
  -1  -4  16 7001.26 885.887  22
  -1  -4  16 5315.42 789.396  23
  -1  -4  15 9768.20 623.407  35
  -1  -4  15 9245.26 835.642  37
  -1  -4  15 8476.01 1494.99  21
  -1  -4  15 9913.81 1175.92  20
  -1  -4  15 9346.12 1329.00  19
  -1  -4  15 8351.82 978.285  22
  -1  -4  15 8237.22 986.351  23
  -1  -4  14 4225.23 520.776  37
  -1  -4  14 4620.58 382.113  35
  -1  -4  14 4797.19 926.181  19
  -1  -4  14 3235.62 1140.17  21
  -1  -4  14 3669.68 690.802  20
  -1  -4  14 4108.32 642.955  22
  -1  -4  14 3264.43 614.031  23
  -1  -4  13 46968.3 2351.05  37
  -1  -4  13 51450.7 2046.73  35
  -1  -4  13 44808.8 2764.54  20
  -1  -4  13 54787.3 3390.82  19
  -1  -4  13 40171.4 2700.72  31
  -1  -4  13 44827.4 2599.12  22
  -1  -4  13 34565.9 2505.64  23
  -1  -4  12 36224.6 1538.33  35
  -1  -4  12 33041.5 1791.90  37
  -1  -4  12 36484.9 2631.80  19
  -1  -4  12 35045.3 2208.87  20
  -1  -4  12 29405.1 2128.10  31
  -1  -4  12 32225.2 1894.38  33
  -1  -4  12 31687.7 2009.66  22
  -1  -4  11 101774. 4735.26  33
  -1  -4  11 117514. 4333.70  35
  -1  -4  11 105204. 4294.80  18
  -1  -4  11 115785. 5668.20  19
  -1  -4  10 117107. 5467.94  33
   1   4 -10 134660. 5035.43  38
  -1  -4  10 132427. 5130.52  35
  -1  -4  10 121353. 5119.90  18
  -1  -4   9 71011.9 2725.79  35
   1   4  -9 67552.4 2646.80  38
   1   4  -8 150436. 5720.39  38
  -1  -4   8 141638. 5812.99  18
   1   4  -7 189795. 7239.17  38
  -1  -4   7 182266. 7345.28  18
   1   4  -6 72432.7 2873.02  38
  -1  -4   6 73626.7 2983.13  18
   1   4  -5 79153.8 3114.94  38
  -1  -4   5 79287.3 3231.74  18
   1   4  -4 17020.0 741.550  38
   1   4  -3 90298.5 3536.34  38
   1   4  -2 9137.54 439.009  38
  -1  -4   2 9558.79 536.938  18
  -1  -4   1 1469.80 192.404  18
  -1  -4   0 109126. 4371.90  18
   1   4   1 74885.9 2924.83  38
  -1  -4  -1 72637.3 3036.02  18
   1   4   2 5746.58 304.173  38
  -1  -4  -2 5565.71 387.734  18
   1   4   3 68418.2 2700.21  38
  -1  -4  -3 68134.4 2819.80  18
   1   4   4 11945.5 554.123  38
  -1  -4  -4 12786.2 666.342  18
   1   4   5 931.063 98.1980  38
   1   4   5 874.589 151.369  15
  -1  -4  -5 894.699 150.899  18
   1   4   6 47359.6 1904.55  38
   1   4   6 43038.6 2008.78  15
   1   4   7 7235.67 365.456  38
   1   4   7 8249.39 476.015  15
   1   4   8 105204. 4831.22  36
   1   4   8 112459. 4583.48  15
   1   4   8 126549. 5212.71  29
   1   4   8 136270. 5348.85  26
   1   4   9 290.716 130.571  36
   1   4   9 402.863 95.8983  15
   1   4   9 450.863 212.593  29
   1   4   9 480.535 242.846  25
   1   4   9 461.705 235.740  26
   1   4  10 23926.2 1427.41  36
   1   4  10 22859.9 1088.27  15
   1   4  10 29518.1 1763.16  29
   1   4  10 31128.6 1874.52  26
   1   4  10 23936.8 1680.87  25
   1   4  11 1220.88 359.979  29
   1   4  11 1478.94 405.096  26
   1   4  11 1371.27 384.583  25
   1   4  12 24298.2 1710.58  29
   1   4  12 23637.4 1762.49  26
   1   4  12 22909.3 1677.04  25
   1   4  13 2073.60 366.180  37
   1   4  13 1707.79 441.507  16
   1   4  13 1798.49 447.644  29
   1   4  13 2137.56 470.524  25
   1   4  13 2863.76 564.674  26
   1   4  14 19987.9 1365.59  37
   1   4  14 20506.3 1604.37  16
   1   4  14 22349.9 1635.20  29
   1   4  14 25420.4 1788.14  26
   1   4  14 23147.4 1630.15  25
   1   4  15 5362.54 604.178  37
   1   4  15 5848.04 756.653  16
   1   4  15 6574.25 922.125  21
   1   4  15 6146.73 819.089  26
   1   4  15 7238.00 802.280  25
   1   4  16 16666.4 1157.75  37
   1   4  16 18254.8 1353.15  16
   1   4  16 20135.1 1596.25  21
   1   4  16 17135.5 1418.96  26
   1   4  16 19832.8 1388.06  25
   1   4  17 3720.02 443.465  37
   1   4  17 5242.79 713.404  21
   1   4  17 4512.66 643.198  26
   1   4  17 3765.83 535.639  25
   1   4  18 17007.2 1096.08  25
   1   4  18 13005.4 868.595  37
   1   4  19 9828.09 740.469  25
  -1  -5  23 1199.58 258.079  22
  -1  -5  23 1448.24 308.853  31
  -1  -5  22 6718.13 687.834  22
  -1  -5  22 6237.41 643.177  34
  -1  -5  22 7980.14 827.654  31
  -1  -5  21 2791.76 478.238  22
  -1  -5  21 1914.37 387.609  34
  -1  -5  21 2426.40 526.245  31
  -1  -5  20 21381.4 1556.91  22
  -1  -5  20 23397.1 1577.44  23
  -1  -5  20 22199.9 1765.09  31
  -1  -5  20 19726.7 1483.95  34
  -1  -5  19 759.284 475.417  20
  -1  -5  19 432.107 284.325  23
  -1  -5  19 694.169 309.142  22
  -1  -5  19 679.487 279.471  34
  -1  -5  18 23440.0 1900.39  20
  -1  -5  18 23334.9 1725.85  22
  -1  -5  18 23301.7 1751.48  23
  -1  -5  17 317.889 131.604  35
  -1  -5  17 526.710 310.154  20
  -1  -5  17 399.256 273.223  30
  -1  -5  17 242.602 299.249  31
  -1  -5  17 302.182 284.189  23
  -1  -5  17 187.419 222.257  22
  -1  -5  16 23528.7 1150.80  35
  -1  -5  16 22383.3 2207.13  19
  -1  -5  16 18658.4 1720.36  20
  -1  -5  16 21093.7 1820.78  31
  -1  -5  16 20742.4 1625.43  22
  -1  -5  16 17796.7 1604.42  23
  -1  -5  15 1771.32 241.698  35
  -1  -5  15 2312.41 711.356  19
  -1  -5  15 1167.16 453.143  20
  -1  -5  15 1013.29 434.961  31
  -1  -5  15 1257.09 377.676  22
  -1  -5  15 1292.54 433.724  23
  -1  -5  14 7913.44 523.910  35
  -1  -5  14 6580.63 916.844  20
  -1  -5  14 8180.53 901.660  22
  -1  -5  14 6311.10 881.228  23
  -1  -5  14 5934.05 925.439  31
  -1  -5  13 15458.2 787.166  35
  -1  -5  13 11141.5 1093.03  22
  -1  -5  13 11988.7 1038.87  33
  -1  -5  13 14113.5 1375.86  31
  -1  -5  12 1123.97 165.663  35
  -1  -5  12 930.276 260.364  33
  -1  -5  12 515.266 292.672  31
  -1  -5  12 800.967 265.823  22
  -1  -5  11 65730.6 3287.87  33
   1   5 -11 72577.4 2788.71  38
  -1  -5  11 72710.8 2898.26  35
  -1  -5  11 67283.4 4101.03  19
  -1  -5  11 66675.0 2913.26  18
  -1  -5  10 314.416 222.133  31
  -1  -5  10 257.373 162.219  33
  -1  -5  10 572.812 117.641  35
   1   5 -10 492.868 87.2031  38
  -1  -5  10 133.523 258.790  19
  -1  -5  10 515.441 131.678  18
  -1  -5   9 121361. 5819.11  33
  -1  -5   9 149436. 5514.61  35
   1   5  -9 141784. 5440.36  38
  -1  -5   9 130825. 5565.84  18
  -1  -5   8 13098.5 939.919  33
   1   5  -8 15658.0 692.519  38
  -1  -5   8 14081.9 790.964  18
   1   5  -7 250364. 9491.51  38
  -1  -5   7 236215. 9625.25  18
   1   5  -6 4678.07 283.233  38
  -1  -5   6 4583.80 374.410  18
   1   5  -5 46681.3 1887.09  38
  -1  -5   5 45216.4 2022.65  18
   1   5  -4 3590.83 238.029  38
   1   5  -3 272087. 10216.1  38
  -1  -5   3 250443. 10339.2  18
   1   5  -2 1659.59 156.409  38
  -1  -5   2 1806.46 233.339  18
  -1  -5   1 80839.9 3345.63  18
   1   5   0 56628.7 2250.08  38
  -1  -5   0 53722.9 2378.79  18
   1   5   1 61559.6 2434.40  38
  -1  -5  -1 58451.6 2568.71  18
   1   5   2 21553.6 934.595  38
  -1  -5  -2 20850.6 1058.87  18
   1   5   3 48013.0 1957.56  38
  -1  -5  -3 48263.1 2108.80  18
   1   5   4 3039.06 211.396  38
   1   5   4 2664.38 282.065  15
  -1  -5  -4 3271.77 310.981  18
   1   5   5 39255.4 1610.03  38
  -1  -5  -5 41075.1 1779.33  18
   1   5   5 36870.2 1745.73  15
   1   5   6 5029.38 577.510  29
   1   5   6 4656.99 283.004  38
  -1  -5  -6 5305.92 407.829  18
   1   5   6 4916.71 383.211  15
   1   5   7 19668.9 865.764  38
   1   5   7 22479.8 1424.96  29
   1   5   7 19441.2 1370.36  10
   1   5   7 19910.6 994.403  15
   1   5   8 130.058 87.7458  15
   1   5   8 185.382 160.400  25
   1   5   8 146.208 180.277  26
   1   5   8 103.408 156.404  29
   1   5   9 20457.1 1051.36  15
   1   5   9 27697.6 1710.91  26
   1   5   9 23049.9 1621.16  25
   1   5   9 26424.3 1646.79  29
   1   5  10 1629.79 408.445  25
   1   5  10 2363.93 485.084  26
   1   5  11 31042.0 2025.71  25
   1   5  11 31842.4 2057.54  26
   1   5  12 25.6293 99.1556  37
   1   5  12 163.139 193.199  25
   1   5  12 134.013 172.782  26
   1   5  13 15463.6 1077.66  37
   1   5  13 14617.7 1333.67  16
   1   5  13 19137.0 1389.84  25
   1   5  13 17953.0 1413.41  26
   1   5  14 3565.56 434.352  37
   1   5  14 4153.05 627.688  26
   1   5  14 3391.99 540.829  25
   1   5  14 3481.51 592.583  16
   1   5  15 16229.8 1284.41  26
   1   5  15 18328.7 1267.67  25
   1   5  15 15462.9 1259.13  16
   1   5  15 14770.8 1367.20  21
   1   5  16 333.143 402.304  26
   1   5  16-28.0193 143.350  25
   1   5  16 31.0752 153.202  16
   1   5  16 40.1893 173.775  21
   1   5  17 26630.1 1500.07  25
   1   5  18 2605.74 329.305  25
  -1  -6  22 11554.4 816.945  34
  -1  -6  21 6551.05 644.652  22
  -1  -6  21 5120.28 578.027  34
  -1  -6  20 6179.90 718.905  23
  -1  -6  20 5043.19 621.993  22
  -1  -6  20 4754.48 602.366  34
  -1  -6  20 5240.94 766.407  31
  -1  -6  19 17356.3 1349.15  34
  -1  -6  19 17218.6 1337.30  22
  -1  -6  19 20760.1 1527.34  23
  -1  -6  19 20888.9 1657.89  31
  -1  -6  18 10509.1 1096.12  23
  -1  -6  18 10547.9 1024.72  22
  -1  -6  18 10732.3 1229.61  31
  -1  -6  17 26532.0 1807.76  22
  -1  -6  17 28003.8 1994.99  23
  -1  -6  17 26424.2 2075.58  31
  -1  -6  16 6795.64 502.527  35
  -1  -6  16 6128.47 781.893  22
  -1  -6  16 6748.02 903.227  23
  -1  -6  16 5470.82 894.542  31
  -1  -6  15 28961.8 2261.96  23
  -1  -6  15 34115.4 2155.30  22
  -1  -6  15 31912.3 2430.06  31
  -1  -6  14 6116.20 455.832  35
  -1  -6  14 5912.61 907.705  31
  -1  -6  14 5262.45 698.470  22
  -1  -6  13 4292.36 574.445  33
  -1  -6  13 3941.38 734.237  31
  -1  -6  13 4018.85 349.710  35
  -1  -6  13 4129.69 931.792  19
  -1  -6  12 35110.7 2531.08  31
  -1  -6  12 36451.1 2188.11  33
  -1  -6  12 44135.8 1834.50  35
  -1  -6  12 39885.7 3020.52  19
  -1  -6  11 471.688 268.229  31
  -1  -6  11 149.548 135.824  33
  -1  -6  11 191.165 87.2974  35
   1   6 -11 137.342 63.7016  38
  -1  -6  11 477.584 377.089  19
  -1  -6  11 299.009 122.070  18
  -1  -6  10 48558.6 2554.91  33
  -1  -6  10 41022.9 2823.46  31
  -1  -6  10 56172.9 2202.44  35
   1   6 -10 52565.8 2108.18  38
  -1  -6  10 47397.3 2261.64  18
  -1  -6  10 45125.1 3277.86  19
  -1  -6   9 76.9449 85.9937  33
  -1  -6   9 138.087 188.853  31
  -1  -6   9 94.9659 77.5080  35
   1   6  -9 110.337 60.9686  38
  -1  -6   9 125.413 95.3496  18
  -1  -6   9 72.0096 311.388  19
   1   6  -8 23028.5 1010.25  38
  -1  -6   8 22558.9 1166.53  18
  -1  -6   8 20557.1 1314.37  33
   1   6  -8 23684.0 1471.78  10
   1   6  -7 26749.0 1149.92  38
  -1  -6   7 25585.2 1304.44  18
  -1  -6   7 23870.3 2045.27  19
  -1  -6   7 24214.1 1749.89   3
   1   6  -6 27987.7 1212.34  38
  -1  -6   6 27091.5 1367.51  18
   1   6  -5 105526. 4173.73  38
  -1  -6   5 105174. 4362.99  18
   1   6  -4 37736.2 1590.29  38
   1   6  -3 92689.8 3624.79  38
  -1  -6   3 87540.5 3778.44  18
  -1  -6   2 11830.4 720.086  18
  -1  -6   1 6237.33 489.281  18
  -1  -6   1 7583.18 841.640   3
   1   6   0 109383. 4220.00  38
  -1  -6   0 115593. 5098.65   3
   1   6   1 363.750 88.0365  38
  -1  -6  -1 258.010 127.710  18
   1   6   1 538.014 257.765  10
  -1  -6  -1 381.768 232.382   3
   1   6   2 79598.6 3165.83  38
  -1  -6  -2 76572.0 3353.33  18
   1   6   2 76176.7 3873.21  10
  -1  -6  -2 85001.5 4050.45   3
   1   6   3 1390.85 152.327  38
  -1  -6  -3 1301.82 227.565  18
   1   6   3 873.110 307.218  10
  -1  -6  -3 1693.26 430.109   3
   1   6   4 109136. 4370.70  38
  -1  -6  -4 114820. 4597.66  18
   1   6   4 108905. 4543.68  15
   1   6   4 103476. 5116.14  10
   1   6   5 2359.94 200.178  38
  -1  -6  -5 2937.76 328.791  18
   1   6   5 2386.33 277.986  15
   1   6   5 2803.62 518.105  10
  -1  -6  -5 2896.81 570.422   3
   1   6   6 58190.3 2351.43  38
   1   6   6 60280.8 3131.45  10
   1   6   6 56893.1 2974.38  25
   1   6   6 57258.5 2506.93  15
   1   6   7 6035.38 758.685  10
   1   6   7 6873.41 759.176  25
   1   6   7 6474.22 467.151  15
   1   6   8 38750.0 2215.86  25
   1   6   8 34155.7 1641.44  15
  -1  -6  -9 440.998 282.990   8
   1   6   9 338.389 218.323  25
   1   6   9 213.115 94.5933  15
   1   6  10 7903.87 845.189  25
   1   6  11 2232.83 445.832  26
   1   6  11 2671.92 464.579  25
   1   6  12 11337.0 1020.24  26
   1   6  12 12228.6 1031.53  25
   1   6  13 11005.2 1012.31  26
   1   6  13 13432.4 1027.23  25
   1   6  13 10386.3 1045.53  16
   1   6  14 14704.3 1051.44  25
   1   6  14 13378.3 1143.35  16
   1   6  15 4641.88 498.165  25
   1   6  15 3520.91 575.393  21
   1   6  15 4273.36 559.288  16
   1   6  16 8267.88 621.786  25
   1   6  16 8423.02 727.188  16
   1   6  17 422.869 166.229  25
  -1  -7  22 1357.16 278.000  31
  -1  -7  21 20317.2 1341.94  31
  -1  -7  21 21314.6 1221.34  23
  -1  -7  20 529.159 283.362  31
  -1  -7  20 271.844 147.851  34
  -1  -7  20 369.967 219.425  23
  -1  -7  19 41911.1 2418.56  31
  -1  -7  19 40944.5 2286.73  23
  -1  -7  18 1445.47 456.939  31
  -1  -7  18 2077.30 481.687  23
  -1  -7  17 41202.5 2586.51  31
  -1  -7  17 35345.2 2364.89  23
  -1  -7  16 171.036 301.989  31
  -1  -7  15 31395.3 2295.18  31
  -1  -7  14 181.517 100.796  35
  -1  -7  14 117.354 253.774  31
  -1  -7  14 68.1506 147.440  33
  -1  -7  13 104254. 4145.94  35
  -1  -7  13 97055.3 5094.84  31
  -1  -7  13 93767.0 4581.68  33
  -1  -7  12 7751.38 517.012  35
  -1  -7  12 7404.72 756.859  33
  -1  -7  12 7730.10 1009.05  31
  -1  -7  12 7752.10 1241.73   4
   1   7 -11 21542.2 1008.12  38
  -1  -7  11 24056.6 1108.15  35
  -1  -7  11 20043.6 1182.10  18
  -1  -7  11 19039.5 1692.80  31
  -1  -7  11 23873.3 1482.39  33
  -1  -7  11 26116.8 2348.89   4
  -1  -7  10 4965.50 367.705  35
   1   7 -10 4558.39 315.313  38
  -1  -7  10 3612.37 411.578  18
  -1  -7  10 3880.46 520.349  33
  -1  -7  10 3908.50 694.902  31
  -1  -7  10 5455.63 1065.97   4
  -1  -7   9 9811.04 550.468  35
   1   7  -9 8565.23 489.368  38
  -1  -7   9 7662.90 624.523  18
  -1  -7   9 7551.23 732.565  33
  -1  -7   9 6313.22 888.236  31
   1   7  -9 9828.48 912.416  10
   1   7  -8 5064.65 335.864  38
  -1  -7   8 4390.09 446.615  18
  -1  -7   8 3832.42 651.593  31
  -1  -7   8 4389.82 528.185  33
  -1  -7   8 4423.22 630.406   8
   1   7  -8 4878.45 644.399  10
   1   7  -7 1525.56 381.575  10
  -1  -7   7 1679.11 410.532   8
   1   7  -7 1730.16 185.023  38
  -1  -7   7 1719.89 275.402  18
   1   7  -6 4595.54 318.905  38
  -1  -7   6 4349.56 444.422  18
  -1  -7   6 4238.51 710.967   3
  -1  -7   6 4496.49 645.570   8
   1   7  -6 4549.37 641.083  10
   1   7  -5 2331.75 215.340  38
  -1  -7   5 1579.63 490.676   3
  -1  -7   5 2393.30 484.702   8
   1   7  -5 2497.08 480.350  10
  -1  -7   4 6015.13 770.162   8
   1   7  -4 5192.89 703.835  10
   1   7  -4 5227.30 349.154  38
   1   7  -3 3313.83 264.070  38
  -1  -7   3 3619.65 387.869  18
  -1  -7   3 3301.60 636.715   3
  -1  -7   3 3518.92 592.503   7
   1   7  -3 3645.50 580.549  10
  -1  -7   3 3492.47 591.265   8
  -1  -7   2 22201.6 1226.74  18
   1   7  -2 24105.3 1678.67  10
  -1  -7   2 22482.9 1761.95   3
   1   7  -1 31998.7 1378.38  38
  -1  -7   1 30504.1 1572.10  18
   1   7  -1 28707.4 1966.05  10
  -1  -7   1 30666.0 2143.09   3
   1   7   0 50494.2 2086.94  38
  -1  -7   0 47992.9 2289.37  18
   1   7   0 50434.3 2243.20  15
  -1  -7   0 47518.9 2929.12   3
   1   7   1 17547.6 837.199  38
  -1  -7  -1 17032.7 1024.16  18
   1   7   1 16887.2 1427.10  10
  -1  -7  -1 16873.8 1504.36   3
   1   7   2 4593.58 322.207  38
  -1  -7  -2 4290.70 451.900  18
   1   7   2 4748.36 725.562  10
  -1  -7  -2 5414.18 807.554   3
   1   7   3 51916.6 2165.73  38
   1   7   3 51760.3 2335.85  15
  -1  -7  -3 52930.1 2414.99  18
   1   7   3 50833.9 2970.35  10
  -1  -7  -3 53749.4 3132.62   3
   1   7   4 46227.8 1961.76  38
  -1  -7  -4 48267.7 2215.17  18
   1   7   4 46567.1 2128.08  15
   1   7   4 47830.1 2780.46  10
  -1  -7  -4 49554.7 2916.14   3
   1   7   5 10623.8 569.307  38
   1   7   5 11081.4 702.703  15
   1   7   5 11090.4 1114.98  10
  -1  -7  -5 13110.5 1272.49   3
   1   7   6 8890.67 953.063  10
   1   7   6 6642.03 596.021  40
   1   7   6 8059.75 560.224  15
   1   7   7 14865.1 1290.72  10
   1   7   7 15341.6 866.044  15
  -1  -7  -8 6065.84 810.887   8
   1   7   8 5432.15 418.225  15
  -1  -7  -9 34981.2 2203.74   8
   1   7  10 16008.4 1135.74  25
   1   7  11 19669.8 1245.72  25
   1   7  11 17895.0 1416.92  16
   1   7  12 7396.60 653.035  25
   1   7  13 16320.8 986.775  25
   1   7  14 12626.0 966.796  16
   1   7  15 4684.81 489.645  16
  -1  -8  20 8469.63 788.805  31
  -1  -8  20 8627.85 743.845  23
  -1  -8  19 4761.14 620.340  31
  -1  -8  19 3484.20 411.043  34
  -1  -8  19 4184.24 560.063  23
  -1  -8  18 9024.27 949.784  31
  -1  -8  17 20587.2 1588.81  31
  -1  -8  16 53879.2 2940.11  31
  -1  -8  16 43631.0 2702.20  23
  -1  -8  15 16913.5 1489.40  31
  -1  -8  15 16229.3 1435.56  23
  -1  -8  14 51050.3 2921.96  31
  -1  -8  14 42497.4 2760.44  23
  -1  -8  13 21881.8 1443.10  33
  -1  -8  13 22800.7 1778.73  31
  -1  -8  12 40745.9 2619.54  31
  -1  -8  12 39350.2 2230.86  33
  -1  -8  12 44415.0 1871.34  35
  -1  -8  11 32471.7 1880.93  33
  -1  -8  11 30980.9 2183.97  31
  -1  -8  11 33383.5 2890.83   4
  -1  -8  11 35612.3 1517.11  35
   1   8 -11 30852.7 1421.69  38
  -1  -8  10 25617.2 2565.93   4
   1   8 -10 23939.8 1128.09  38
  -1  -8  10 25615.9 1190.99  35
  -1  -8  10 22828.9 1786.13  31
  -1  -8  10 24366.8 1526.82  33
   1   8 -10 25188.8 1681.29  10
   1   8  -9 13595.8 705.837  38
  -1  -8   9 14175.0 747.243  35
  -1  -8   9 12324.3 881.540  18
  -1  -8   9 11654.3 965.162  33
   1   8  -9 14692.5 1228.25  10
  -1  -8   8 9177.98 525.163  35
   1   8  -8 7590.62 478.298  38
   1   8  -8 7743.01 540.880  15
  -1  -8   8 7862.74 655.806  18
  -1  -8   8 7397.33 715.242  33
   1   8  -8 9220.37 957.443  10
  -1  -8   8 6446.29 845.109   8
   1   8  -7 488.480 114.077  38
   1   8  -7 261.593 116.691  15
  -1  -8   7 144.484 149.953  18
  -1  -8   7 461.800 182.467  33
  -1  -8   7 373.760 239.408   8
   1   8  -7 573.129 289.418  10
   1   8  -6 1926.52 209.011  38
  -1  -8   6 1655.41 303.336  18
   1   8  -6 2267.63 280.855  15
   1   8  -6 2620.03 536.782  10
  -1  -8   6 2033.21 487.884   8
   1   8  -5 142.315 81.8726  38
   1   8  -5 219.202 113.240  15
   1   8  -5 231.085 227.953  10
  -1  -8   5 296.324 278.515   8
   1   8  -4 79.6065 73.6226  38
   1   8  -4 47.1064 193.253  10
  -1  -8   4 50.6278 207.696   8
  -1  -8   4 60.3574 126.098  18
   1   8  -4 90.5670 101.152  15
  -1  -8   3 568.117 181.778  18
   1   8  -3 859.357 193.037  15
   1   8  -3 622.482 341.257  10
  -1  -8   3 879.991 368.753   8
  -1  -8   3 633.552 306.540   7
  -1  -8   3 703.121 393.404   3
   1   8  -2 3006.26 333.801  15
  -1  -8   2 2289.33 344.947  18
  -1  -8   2 2007.65 551.142   3
  -1  -8   2 2657.28 590.230   8
   1   8  -2 2961.03 580.003  10
  -1  -8   2 3347.70 624.829   7
   1   8  -1 1826.33 204.694  38
   1   8  -1 1747.16 264.166  15
  -1  -8   1 2017.66 323.775  18
  -1  -8   1 1603.25 505.450   3
   1   8  -1 1620.92 451.054  10
  -1  -8   1 2753.25 578.946   7
   1   8   0 4684.03 339.362  38
   1   8   0 4438.17 417.704  15
  -1  -8   0 4388.16 475.888  18
  -1  -8   0 3927.37 743.952   3
  -1  -8   0 5923.34 825.591   8
   1   8   1 1727.30 195.159  38
  -1  -8  -1 1824.09 306.252  18
   1   8   1 1456.15 234.587  15
  -1  -8  -1 1603.19 498.149   3
  -1  -8  -1 2430.03 539.650   8
   1   8   1 2059.42 499.286  10
   1   8   2 5836.51 397.306  38
  -1  -8  -2 6706.45 586.149  18
  -1  -8  -2 7110.57 931.681   8
   1   8   2 6710.70 889.166  10
   1   8   3 22354.7 1048.09  38
   1   8   3 22211.5 1193.72  15
  -1  -8  -3 26979.3 1929.81   8
   1   8   3 23249.0 1779.37  10
   1   8   4 207.880 76.3850  38
   1   8   4 211.540 114.360  15
   1   8   4 99.9322 246.463  10
  -1  -8  -4 375.389 293.415   8
   1   8   5 5217.55 519.364  40
   1   8   5 6089.88 816.131  10
   1   8   5 5215.41 442.182  15
  -1  -8  -6 31829.1 2182.82   8
  -1  -8  -7 46141.9 2739.76   8
  -1  -8  -8 24661.5 1746.01   8
  -1  -8  -9 26005.7 1721.01   8
   1   8  10 9872.09 918.878  16
   1   8  11 35199.4 1977.87  16
   1   8  12 10106.0 821.868  16
  -1  -8 -13 19610.2 1319.82   7
   1   8  13 20105.9 1165.78  16
  -1  -9  19 133.265 113.581  31
  -1  -9  18 4069.34 495.764  31
  -1  -9  17 1436.63 355.751  23
  -1  -9  17 1234.41 312.760  31
  -1  -9  16 12259.1 1057.84  23
  -1  -9  16 10723.1 978.116  31
  -1  -9  15 1502.78 406.642  23
  -1  -9  15 2072.28 438.571  31
  -1  -9  14 29575.6 2046.34  23
  -1  -9  14 35628.2 2095.36  31
  -1  -9  13 7903.44 969.042  23
  -1  -9  13 8607.50 744.070  33
  -1  -9  12 59041.8 3035.02  31
  -1  -9  12 55340.5 2686.87  33
   1   9 -12 52748.8 2542.06  40
  -1  -9  11 10405.7 840.390  33
  -1  -9  11 9316.69 1475.01   4
   1   9 -11 9718.73 780.592  40
  -1  -9  10 54609.8 4060.91   4
   1   9 -10 61845.1 3095.46  10
  -1  -9  10 56365.7 2800.41  33
  -1  -9   9 1218.44 607.230   4
  -1  -9   9 1084.80 261.640  33
   1   9  -9 1037.89 352.356  10
  -1  -9   8 33774.4 3046.17   4
  -1  -9   8 28547.6 1638.69  33
   1   9  -8 30858.6 1990.16  10
   1   9  -8 27791.9 1296.43  38
  -1  -9   7-118.849 459.650   4
   1   9  -7 64.5929 70.3104  38
  -1  -9   7 128.416 105.394  33
  -1  -9   7 48.8362 231.337   8
   1   9  -7 46.1384 244.352  10
   1   9  -6 40781.9 1765.28  38
   1   9  -6 39384.5 1837.19  15
  -1  -9   6 38633.1 2026.78  18
  -1  -9   6 41856.3 2118.98  33
  -1  -9   6 36037.3 2473.42   8
  -1  -9   5 794.368 378.285   8
   1   9  -5 1272.00 414.214  10
   1   9  -5 1026.32 161.060  38
   1   9  -5 1032.32 199.540  15
   1   9  -4 5538.91 786.149  10
  -1  -9   4 5365.93 822.221   8
   1   9  -4 4900.11 358.760  38
   1   9  -4 4608.17 411.214  15
  -1  -9   4 3765.55 470.130  18
  -1  -9   3 167.230 252.900   8
   1   9  -3 252.734 249.305  10
   1   9  -3 360.955 134.096  15
  -1  -9   3 43.2407 122.109  18
   1   9  -2 2036.11 499.834  10
  -1  -9   2 1578.22 502.240   8
  -1  -9   2 1364.12 434.620   7
   1   9  -2 1356.64 182.065  38
   1   9  -2 1275.46 218.050  15
  -1  -9   1 52.0997 213.727   7
   1   9  -1 64.8681 67.0900  38
   1   9  -1 58.7097 82.7804  15
   1   9   0 3079.80 273.190  38
  -1  -9   0 4566.45 752.019   7
  -1  -9   0 3292.24 655.007   8
  -1  -9  -1 871.714 387.546   7
   1   9   1 370.144 298.699  10
  -1  -9  -1 376.851 312.873   8
   1   9   2 4652.37 743.761  10
  -1  -9  -2 4042.33 718.681   8
   1   9   3 10779.9 817.516  40
  -1  -9  -3 9791.53 1118.13   8
  -1  -9  -3 13220.7 1300.33   7
   1   9   3 12662.4 1221.55  10
  -1  -9  -4 2508.58 585.475   8
  -1  -9  -4 3817.42 702.886   7
  -1  -9  -4 2996.65 866.686   4
  -1  -9  -5 14270.9 1354.27   8
  -1  -9  -5 15646.0 1774.60   4
  -1  -9  -6 23042.8 1689.39   8
   1   9   7 3877.12 551.259  16
  -1  -9  -7 2926.00 537.527   8
   1   9   8 40050.0 2280.39  16
  -1  -9  -8 53578.5 2779.51   7
   1   9   9 4424.01 537.126  16
  -1  -9  -9 5608.62 719.757   7
   1   9  10 51506.6 2503.80  16
  -1  -9 -10 55909.4 2794.65   7
   1   9  11 962.934 211.360  16
  -1 -10  17 531.065 177.051  23
  -1 -10  16 1796.43 322.364  23
  -1 -10  15 5508.60 627.368  23
  -1 -10  14-31.2473 165.481  23
  -1 -10  13 19880.6 1416.04  23
  -1 -10  12 4067.79 589.509  23
   1  10 -12 3104.37 346.200  40
  -1 -10  11 6290.20 761.449  23
   1  10 -11 6275.53 548.917  40
  -1 -10  10 7387.84 1285.60   4
   1  10 -10 9198.24 716.383  40
  -1 -10   9 12380.5 1721.92   4
   1  10  -9 13536.6 939.502  40
  -1 -10   8 2284.10 806.549   4
   1  10  -8 1878.98 438.005  10
  -1 -10   7 29666.2 2827.99   4
   1  10  -7 29970.3 1956.20  10
  -1 -10   6 3320.46 976.451   4
   1  10  -6 3089.22 592.153  10
   1  10  -5 30329.5 2024.15  10
  -1 -10   4 532.078 483.486   4
  -1 -10   4 548.762 328.460   8
   1  10  -4 1371.30 438.498  10
  -1 -10   3 29730.8 2802.31   4
  -1 -10   3 23816.1 1907.39   8
   1  10  -3 30334.3 1982.63  10
  -1 -10   2 733.841 517.461   4
  -1 -10   2 668.717 373.050   8
   1  10  -2 642.290 314.683  10
  -1 -10   1 11865.2 1715.47   4
   1  10   0 112.987 127.490  40
  -1 -10   0 394.165 426.112   4
  -1 -10   0 95.3056 243.846   8
   1  10   1 1074.97 239.463  40
  -1 -10  -1 1497.52 628.713   4
  -1 -10  -1 1716.15 464.100   8
   1  10   2 36.6189 93.6937  40
  -1 -10  -2 133.408 243.227   8
  -1 -10  -2 86.6782 355.562   4
  -1 -10  -3 4821.76 703.622   8
  -1 -10  -3 5075.83 981.741   4
  -1 -10  -4 323.857 354.322   4
   1  10   4 143.921 160.816  16
   1  10   5 7620.30 675.864  16
   1  10   6 240.500 140.033  16
   1  10   7 17761.1 1035.85  16
  -1 -10  -7 16841.4 1455.01   9
   1  10   8 395.478 128.720  16
  -1 -11  14 97.4784 96.9014  23
  -1 -11  13 1939.13 304.928  23
  -1 -11  12 128.669 120.999  23
   1  11 -11 33.5984 59.3139  40
  -1 -11  11-23.2933 114.839  23
   1  11 -10 3554.12 360.703  40
  -1 -11  10 4506.91 516.826  23
   1  11  -9 2550.62 314.202  40
  -1 -11   9 2555.57 693.335   4
  -1 -11   9 2629.34 407.657  23
   1  11  -8 9646.35 682.086  40
  -1 -11   8 7974.04 1220.35   4
  -1 -11   8 8940.23 774.436  23
   1  11  -7 4674.92 459.566  40
  -1 -11   7 3681.65 868.859   4
   1  11  -6 13510.8 884.881  40
   1  11  -5 6914.49 595.728  40
  -1 -11   5 9767.30 1292.98   9
  -1 -11   4 7437.01 1246.67   4
  -1 -11   4 10513.0 1385.39   9
  -1 -11   3 5498.31 1049.03   4
   1  11  -2 8735.28 663.576  40
  -1 -11   2 8636.78 1238.28   4
   1  11  -1 3281.48 372.830  40
  -1 -11   1 3894.58 856.303   4
   1  11   0 4743.51 427.701  40
  -1 -11   0 4682.41 879.178   4
  -1 -11  -1 1023.69 429.610   4
  -1 -11  -2 21338.5 1801.01   9
  -1 -11  -2 11679.4 1252.01   4
  -1 -11  -3 5001.00 810.794   9
  -1 -11  -3 2525.78 470.057   4
  -1 -11  -4 5975.25 817.751   9
   2 -12  -1 1864.90 514.916   9
   2 -12   0 25070.2 1999.77   9
   2 -12   1 2307.16 633.890   9
   2 -12   1 2563.93 279.945  33
   2 -12   2 31001.1 1491.56  33
   2 -12   3 1308.30 510.011   9
   2 -12   3 1471.51 222.376  33
   2 -12   4 9551.50 1228.69   9
   2 -12   4 9271.99 634.208  33
  -2  12  -5 814.063 230.668   1
   2 -12   5 524.872 370.850   9
   2 -12   5 681.773 159.239  33
   2 -12   6 1012.89 188.656  33
  -2  12  -6 1096.69 253.621   1
   2 -12   7 1792.58 245.909  33
  -2  12  -7 2145.98 344.594   1
   2 -12   8 42.2551 66.7348  33
   2 -12   9 727.973 148.812  33
  -2  12  -9 522.889 119.699  40
  -2  12 -10 693.162 183.908   1
   2 -11  -6 2581.67 477.415   7
   2 -11  -6 2459.55 512.519   9
   2 -11  -5 4397.62 797.089   9
   2 -11  -5 5207.49 678.118   7
   2 -11  -4-69.1731 327.649   9
   2 -11  -4 160.106 204.785   7
   2 -11  -3 19793.0 1586.42   7
   2 -11  -3 23103.0 2121.67   9
   2 -11  -2 3478.37 892.517   9
   2 -11  -2 3260.12 624.961   7
   2 -11  -1 92873.5 5087.72   9
   2 -11  -1 85595.1 4079.02   7
   2 -11   0 33085.1 2167.63   7
   2 -11   0 36463.0 2911.13   9
   2 -11   1 39684.0 2485.67   7
   2 -11   1 30110.5 2848.66   4
  -2  11  -2 20032.0 1355.00   1
   2 -11   2 15136.5 1920.35   4
   2 -11   3 16324.9 2022.31   9
  -2  11  -3 18927.1 1317.49   1
   2 -11   4 17173.7 2004.26   9
   2 -11   4 11794.8 1699.59   4
  -2  11  -4 15878.6 1217.42   1
   2 -11   5 9741.46 1512.13   9
   2 -11   5 6463.55 1259.22   4
   2 -11   6 13913.0 996.109  33
   2 -11   6 11767.0 1666.44   9
   2 -11   7 3704.56 457.800  33
   2 -11   7 2460.95 768.186   9
   2 -11   7 2624.20 848.596   4
   2 -11   8 24.5875 88.9537  33
   2 -11   9 2507.96 370.302  33
   2 -11  10 5482.13 552.712  33
   2 -11  11 547.904 168.149  33
   2 -11  12 60.9266 96.2232  33
   2 -11  13 1198.79 224.802  33
   2 -11  13 1048.93 205.966  23
   2 -11  14 456.681 132.313  23
  -2  11 -14 563.266 169.054   1
   2 -10 -10 2611.28 428.535   7
   2 -10  -9 2215.07 450.033   7
   2 -10  -8 3241.84 552.942   7
  -2  10   7 19.4370 106.310  16
   2 -10  -7 89.1586 236.079   7
   2 -10  -7-67.2205 331.399   9
  -2  10   6 5702.69 550.275  16
   2 -10  -6 5353.27 1044.78   9
   2 -10  -5 646.472 489.694   9
   2 -10  -4 12789.8 1731.93   9
   2 -10  -4 11582.5 1273.05   7
   2 -10  -3 23704.8 1909.41   7
   2 -10  -3 25777.4 2564.33   9
   2 -10  -2 1314.71 479.077   7
   2 -10  -2 1224.58 682.473   9
   2 -10  -2 1242.12 634.815   4
   2 -10  -1 21094.4 1827.30   7
   2 -10  -1 23689.8 2537.97   9
  -2  10   1 20875.0 1482.72   1
   2 -10   0 775.731 433.333   7
   2 -10   0 465.153 573.536   9
   2 -10   0 113.793 348.302   4
  -2  10   0 472.667 264.354   1
   2 -10   1 38243.9 2647.02   7
  -2  10  -1 37713.5 2256.80   1
   2 -10   2 260.631 417.992   7
   2 -10   2 237.322 486.845   4
   2 -10   3 115575. 6415.28   9
   2 -10   3 97180.4 4969.73   7
   2 -10   4 3432.25 716.080   7
   2 -10   4 3892.56 1068.16   9
   2 -10   5 50727.5 3142.27   7
   2 -10   5 38983.2 3647.74   4
   2 -10   6 13195.6 1854.15   9
   2 -10   6 11380.3 1273.46   7
   2 -10   7 1478.53 326.912  33
   2 -10   7 1121.83 596.247   9
   2 -10   7 983.042 652.708   4
   2 -10   8 6647.73 1286.05   9
   2 -10   8 4771.76 1169.23   4
   2 -10   8 5715.94 697.902  23
   2 -10   8 8678.34 803.593  33
   2 -10   9 8087.64 1504.91   4
   2 -10   9 12178.9 978.372  33
   2 -10   9 9442.84 920.904  23
   2 -10  10 4449.75 559.143  33
   2 -10  10 3760.53 557.724  23
   2 -10  11 9240.79 845.307  33
   2 -10  11 9433.98 886.582  23
   2 -10  12 25691.3 1580.07  33
   2 -10  12 25639.6 1630.87  23
   2 -10  13 808.534 244.010  33
   2 -10  13 1268.08 308.456  23
   2 -10  14 3094.82 424.715  33
   2 -10  14 2835.39 448.801  23
   2 -10  15 75.4177 141.757  23
   2 -10  16 5379.70 550.714  23
   2 -10  17 3484.87 498.839  30
   2 -10  17 4624.45 453.822  23
  -2   9  12 17512.9 1219.64  21
   2  -9 -12 17550.6 1268.88   7
  -2   9  11 6632.37 625.413  16
   2  -9 -11 6635.20 786.380   7
  -2   9  10 19287.3 1268.96  16
   2  -9 -10 20767.8 1582.93   7
  -2   9   9 13213.1 1030.33  16
   2  -9  -9 13796.0 1298.43   7
  -2   9   8 3628.08 516.060  16
   2  -9  -8 4205.02 892.827   9
   2  -9  -8 4180.73 724.808   7
  -2   9   7 8436.91 840.216  16
   2  -9  -7 8428.59 1402.05   9
   2  -9  -7 9956.77 1154.10   7
  -2   9   6 3534.70 535.725  16
   2  -9  -6 4403.74 806.992   7
   2  -9  -6 4357.26 1048.18   9
  -2   9   5 5204.90 644.935  16
   2  -9  -5 4104.78 968.233   4
  -2   9   4 862.194 277.779  16
   2  -9  -4 525.592 519.105   4
  -2   9   3 1454.41 181.274  38
  -2   9   3 1896.34 238.436  15
  -2   9   3 2156.01 439.697   1
  -2   9   2 749.696 132.326  38
  -2   9   2 872.609 171.764  15
   2  -9  -2 1522.97 552.819   7
  -2   9   2 863.831 324.617   1
   2  -9  -2 808.300 547.838   4
  -2   9   1 381.523 103.620  38
  -2   9   1 338.751 117.884  15
   2  -9  -1 970.645 444.893   7
  -2   9   1 554.441 297.715   1
   2  -9  -1 118.459 458.367   4
  -2   9   0 16330.1 841.057  38
  -2   9   0 16777.1 894.340  15
   2  -9   0 18882.0 1770.46   7
   2  -9   0 14075.5 2023.71   4
  -2   9  -1 20600.8 1015.51  38
  -2   9  -1 20712.1 1051.65  15
   2  -9   1 19366.2 2350.29   4
   2  -9   1 24004.4 1990.49   7
  -2   9  -2 59368.7 2521.16  15
   2  -9   2 65171.2 3748.92   7
  -2   9  -3 4448.29 350.110  38
  -2   9  -3 5110.67 384.931  15
   2  -9   3 5581.96 920.171   7
   2  -9   3 3386.28 966.816   4
  -2   9  -4 9761.39 594.173  38
  -2   9  -4 11303.5 630.878  15
   2  -9   4 15085.3 2064.78   9
   2  -9   4 13225.8 1425.55   7
   2  -9   4 10327.6 1710.53   4
   2  -9   5-67.3043 291.106   7
   2  -9   5 489.059 528.711   9
  -2   9  -5 132.348 93.4843  38
  -2   9  -5 259.818 95.1504  15
   2  -9   6 41824.7 3481.81   9
   2  -9   6 38256.7 2645.99   7
  -2   9  -6 34048.1 1545.98  38
  -2   9  -7 19384.1 938.343  38
   2  -9   7 15937.6 2194.09   4
   2  -9   7 19892.5 1793.98   7
   2  -9   7 17183.4 1395.15  23
  -2   9  -8 52011.7 2138.51  38
   2  -9   8 43011.4 3860.34   4
   2  -9   8 46920.6 3121.29   7
   2  -9   8 44713.8 2720.72  23
   2  -9   9-109.196 395.031   9
   2  -9   9 122.851 475.119   4
   2  -9   9-35.4882 160.938  33
   2  -9   9-41.6529 180.104  23
  -2   9  -9 8.43035 70.1174  38
   2  -9  10 12486.8 1889.96   4
   2  -9  10 14816.6 1311.86  23
   2  -9  11-35.7993 129.518  33
   2  -9  11-42.2485 200.120  23
   2  -9  12 4643.62 620.606  33
   2  -9  12 4891.83 700.238  23
   2  -9  13 7049.98 761.727  33
   2  -9  13 6885.69 831.471  23
   2  -9  14 19930.2 1370.33  33
   2  -9  14 19163.5 1414.32  31
   2  -9  14 18283.0 1427.61  23
   2  -9  15 7342.80 749.240  33
   2  -9  15 8410.84 847.012  31
   2  -9  15 8789.73 882.143  23
   2  -9  16 9687.44 905.465  31
   2  -9  16 10649.1 949.956  23
   2  -9  17 4888.38 576.293  31
   2  -9  17 4305.25 559.552  23
   2  -9  18 12647.1 1058.07  30
   2  -9  18 13053.6 947.879  31
   2  -9  18 13632.6 975.749  23
   2  -9  19 5842.05 521.100  31
   2  -9  19 5925.35 545.373  23
   2  -8 -14-29.8561 187.086   7
  -2   8  14-59.2663 176.627  21
   2  -8 -13 26435.3 1828.36   7
  -2   8  13 30612.4 1697.69  16
   2  -8 -12 2583.55 563.045   7
  -2   8  12 2144.25 403.600  16
   2  -8 -11 20447.4 1681.91   7
  -2   8  11 19561.4 1407.15  16
   2  -8 -10 350.545 366.386   7
  -2   8  10 408.289 238.513  16
  -2   8   9 19667.2 1459.64  16
   2  -8  -8 201.184 363.963   9
  -2   8   8 158.653 203.024  16
  -2   8   7 19209.0 1459.08  16
  -2   8   7 19860.9 1035.42  15
  -2   8   6 19583.9 1454.46  16
  -2   8   6 20094.4 1052.51  15
  -2   8   5 18455.5 906.173  38
  -2   8   5 21763.4 1056.29  15
  -2   8   5 17172.1 1361.64  16
   2  -8  -5 24095.7 1935.95   7
   2  -8  -5 15043.2 1974.57   4
  -2   8   5 20518.4 1467.54   1
  -2   8   4 12339.7 657.150  38
  -2   8   4 13350.2 1104.68  16
  -2   8   4 14675.9 1201.70   1
  -2   8   3 540.246 110.551  38
  -2   8   3 643.513 149.132  15
  -2   8   3 658.865 247.668  16
   2  -8  -3 434.260 306.793   8
  -2   8   3 605.300 292.769   1
   2  -8  -3 217.368 470.439   4
  -2   8   2 1225.33 163.961  38
  -2   8   2 1014.00 174.197  15
   2  -8  -2 1287.40 423.591   8
   2  -8  -2 1209.27 621.303   4
  -2   8   2 1188.44 365.751   1
  -2   8   1 61992.4 2519.22  38
  -2   8   1 59469.7 2580.62  15
   2  -8  -1 52027.2 3280.04   8
   2  -8  -1 68243.5 3759.96   7
   2  -8  -1 56936.8 4255.30   4
  -2   8   0 8162.43 487.543  38
  -2   8   0 7721.12 521.851  15
   2  -8   0 8737.51 1447.75   4
   2  -8   0 6143.41 876.269   8
   2  -8   0 8122.75 1086.50   7
  -2   8  -1 18382.0 922.001  15
   2  -8   1 19277.1 2185.70   4
   2  -8   1 19950.4 1750.07   7
  -2   8  -2 29741.9 1363.11  15
   2  -8   2 28914.6 2238.55   7
   2  -8   2 25660.6 2648.46   4
  -2   8  -3 2221.22 225.208  38
  -2   8  -3 2650.63 259.197  15
   2  -8   3 2829.80 655.644   7
   2  -8   3 2062.38 804.534   4
  -2   8  -4 14900.0 772.590  38
  -2   8  -4 15488.9 795.371  15
   2  -8   4 15952.9 1552.56   7
   2  -8   4 15278.9 1940.56   4
   2  -8   5 18115.6 1656.41   7
  -2   8  -5 16238.7 825.873  38
  -2   8  -5 16764.0 836.365  15
  -2   8  -6 7439.87 454.212  38
  -2   8  -6 6921.79 441.317  15
   2  -8   6 6872.66 1034.35   7
   2  -8   6 8794.41 1512.96   9
   2  -8   6 6937.05 1353.67   4
   2  -8   7 20137.7 1869.61   7
  -2   8  -7 23665.5 1085.93  38
   2  -8   7 19342.3 2375.34   4
  -2   8  -8 9332.04 523.558  38
   2  -8   8 6596.37 1362.19   4
   2  -8   8 8930.76 1159.59   7
   2  -8   8 7783.67 906.331  23
   2  -8   9 47388.2 3550.43   9
  -2   8  -9 41163.0 1767.13  38
   2  -8   9 32690.8 3221.24   4
   2  -8   9 48564.8 2434.72  33
   2  -8   9 36478.2 2399.19  23
   2  -8  10 24229.4 2436.93   9
   2  -8  10 18159.6 2277.08   4
  -2   8 -10 23430.6 1070.89  38
   2  -8  10 28103.3 1689.87  33
   2  -8  10 20251.0 1639.76  23
   2  -8  11 40590.0 2506.03  31
   2  -8  11 46721.3 2469.52  33
   2  -8  11 38329.5 2491.30  23
   2  -8  12 5292.01 675.221  33
   2  -8  12 5653.20 787.994  31
   2  -8  12 4123.86 688.045  23
   2  -8  13 22043.6 1556.97  33
   2  -8  13 21577.5 1668.32  31
   2  -8  13 20280.2 1623.51  23
   2  -8  14 13867.4 1157.42  33
   2  -8  14 13707.1 1287.01  31
   2  -8  14 12309.8 1200.99  23
   2  -8  15 5803.72 722.633  33
   2  -8  15 7691.12 919.391  31
   2  -8  15 7711.55 880.913  23
   2  -8  16 89.5538 212.092  31
   2  -8  16-40.6914 184.535  23
   2  -8  17 10845.6 1069.94  31
   2  -8  17 10601.5 1003.31  23
   2  -8  18 594.218 296.865  30
   2  -8  18 816.555 305.417  31
   2  -8  18 523.716 229.431  23
   2  -8  19 10570.1 934.844  31
   2  -8  19 9166.07 908.986  30
   2  -8  19 10321.6 871.404  23
   2  -8  20 25.5767 135.493  31
   2  -8  20 90.2472 97.6196  34
   2  -8  20 177.768 145.758  23
  -2   7  16 19472.7 1265.19  21
   2  -7 -16 15170.0 1081.90   7
  -2   7  15 3425.14 362.172  37
  -2   7  15 4454.28 626.348  21
   2  -7 -15 5294.54 653.311   7
  -2   7  14 16665.1 1218.50  16
  -2   7  14 15164.6 1317.36  21
   2  -7 -14 14834.5 1315.69   7
  -2   7  13 20507.0 1282.43  36
  -2   7  13 25814.1 1624.62  16
  -2   7  12 934.501 229.284  36
  -2   7  12 959.821 347.705  16
  -2   7  11 15566.5 1109.29  36
  -2   7  11 18567.1 1415.44  16
  -2   7  10 20311.2 1325.71  36
  -2   7  10 22450.3 1618.55  16
  -2   7   9 5097.16 561.742  36
  -2   7   9 3870.98 632.740  16
  -2   7   8 19155.0 1271.08  36
  -2   7   8 20705.2 1047.68  15
  -2   7   8 20375.8 1535.24  16
  -2   7   7 2633.31 397.751  36
  -2   7   7 3154.70 539.730  16
  -2   7   7 3154.85 311.837  15
  -2   7   6 767.415 210.868  36
  -2   7   6 496.096 95.3600  38
  -2   7   6 305.933 210.165  16
  -2   7   6 631.924 144.411  15
  -2   7   6 616.356 258.416   1
   2  -7  -6 498.787 297.992   8
  -2   7   5 13319.6 659.018  38
  -2   7   5 13374.2 756.691  15
   2  -7  -5 11408.3 1208.25   8
  -2   7   5 14000.6 1162.84   1
   2  -7  -5 11272.7 1607.31   4
  -2   7   4 16056.6 781.262  38
   2  -7  -4 16119.9 1882.39   4
  -2   7   4 16913.6 1297.36   1
   2  -7  -4 16071.2 1413.18   8
  -2   7   3 3007.20 245.876  38
  -2   7   3 3037.60 296.451  15
  -2   7   3 3507.96 543.556   1
   2  -7  -3 3518.97 898.998   4
   2  -7  -3 2538.41 534.812   8
  -2   7   2 119517. 4628.11  38
  -2   7   2 114858. 4692.19  15
   2  -7  -2 121104. 6539.94   4
   2  -7  -2 104422. 5398.90   8
  -2   7   1 30778.1 1346.18  38
  -2   7   1 30300.8 1398.06  15
   2  -7  -1 30980.2 2670.10   4
   2  -7  -1 26875.3 1939.92   8
  -2   7   0 37958.5 1589.95  38
  -2   7   0 37689.2 1636.01  15
  -2   7   0 30238.0 2125.37  10
   2  -7   0 42489.8 2558.45   7
   2  -7   0 31532.2 2178.33   8
   2  -7   0 34247.3 2907.16   4
  -2   7  -1 282.569 106.247  15
   2  -7   1 91.3441 353.280   4
  -2   7  -1 39.9261 181.089  10
   2  -7   1-171.903 203.582   8
   2  -7   1 212.937 272.370   7
  -2   7  -2 57310.0 2442.85  38
  -2   7  -2 61920.8 2491.92  15
   2  -7   2 60458.5 4037.76   4
  -2   7  -2 56106.2 3075.03  10
   2  -7   2 65595.7 3484.74   7
  -2   7  -3 104.181 74.4210  38
  -2   7  -3 256.384 98.0294  15
   2  -7   3 91.0919 329.616   4
  -2   7  -3 228.170 214.512  10
   2  -7   3 356.465 251.307   8
  -2   7  -4 53622.0 2267.28  38
  -2   7  -4 57666.8 2296.66  15
  -2   7  -4 49542.4 2832.87  10
   2  -7   4 52765.1 3180.55   7
  -2   7  -5 3378.63 259.470  38
  -2   7  -5 3088.05 253.053  15
   2  -7   5 2663.97 795.732   4
  -2   7  -5 2995.51 498.898  10
   2  -7   5 2567.20 603.125   7
  -2   7  -6 27617.2 1191.51  38
  -2   7  -6 25177.6 1171.15  15
   2  -7   6 23116.0 2396.92   4
   2  -7   6 25943.0 2011.56   7
  -2   7  -7 18258.6 858.951  38
   2  -7   7 15192.8 1920.18   4
   2  -7   7 14922.7 1530.61   7
  -2   7  -8 21314.0 947.291  38
   2  -7   8 13811.2 1894.09   4
   2  -7   8 22413.6 2212.10   9
   2  -7   8 15920.2 1595.43   7
   2  -7   9 21739.0 2217.52   9
  -2   7  -9 23075.3 1002.57  38
   2  -7   9 15012.1 2016.26   4
   2  -7   9 20968.9 1594.70  31
   2  -7   9 23176.2 1512.91  33
   2  -7   9 17043.8 1470.75  23
   2  -7  10 17654.8 1978.77   9
   2  -7  10 16978.5 1423.99  31
   2  -7  10 19925.1 1348.75  33
   2  -7  10 14395.3 1313.38  23
  -2   7 -10 17627.5 814.662  38
   2  -7  11 16416.9 1423.16  31
   2  -7  11 17487.6 1278.82  33
   2  -7  12 8443.29 989.651  23
   2  -7  12 10342.1 1123.02  31
   2  -7  12 9893.19 954.827  33
   2  -7  13 23801.9 1792.57  23
   2  -7  13 25212.0 1909.78  31
   2  -7  13 25493.7 1711.72  33
   2  -7  14 10843.1 1123.00  23
   2  -7  14 10479.6 1115.34  27
   2  -7  14 10857.1 1188.46  31
   2  -7  14 11101.2 1039.78  33
   2  -7  15 6088.89 828.719  23
   2  -7  15 6721.70 855.510  27
   2  -7  15 7118.25 805.714  33
   2  -7  15 7153.14 948.149  31
   2  -7  16 20532.8 1622.66  23
   2  -7  16 22120.8 1761.48  31
   2  -7  17 18688.8 1476.23  23
   2  -7  17 20345.9 1632.58  31
   2  -7  18 9154.10 930.814  23
   2  -7  18 8242.69 1009.02  30
   2  -7  18 8034.69 968.572  31
   2  -7  19 5942.45 694.448  23
   2  -7  19 5159.22 748.239  30
   2  -7  19 5898.97 764.501  31
   2  -7  20 7797.42 765.461  34
   2  -7  20 8753.86 810.823  23
   2  -7  20 9445.91 915.695  31
   2  -7  20 8831.16 877.042  30
   2  -7  21 6696.11 621.845  34
   2  -7  21 6968.45 707.635  31
  -2   6  18 1190.64 301.645  21
  -2   6  17 19389.5 1120.94  37
  -2   6  17 21843.3 1470.88  21
  -2   6  16 2416.87 354.330  37
  -2   6  16 2472.02 522.966  21
  -2   6  16 3452.29 531.438  25
   2  -6 -16 3055.33 514.361   7
  -2   6  15 11443.0 1019.88  16
  -2   6  15 9885.39 1100.13  21
  -2   6  15 10923.7 880.151  25
  -2   6  14 4366.58 543.441  36
  -2   6  14 5599.73 732.573  16
  -2   6  14 5590.25 607.807  25
  -2   6  13 11009.2 945.416  36
  -2   6  13 12021.4 1140.10  16
  -2   6  13 13981.7 1022.13  25
  -2   6  12 5278.23 614.448  36
  -2   6  12 4654.87 709.830  16
  -2   6  12 5833.76 633.998  25
  -2   6  11 46260.4 2469.06  36
  -2   6  11 49256.4 2762.52  16
  -2   6  10 4239.40 531.295  36
  -2   6  10 3150.05 572.774  16
  -2   6   9 6044.05 641.179  36
  -2   6   9 6006.15 771.699  16
  -2   6   9 6204.94 444.682  15
  -2   6   8 4234.72 515.059  36
  -2   6   8 4054.39 614.727  16
  -2   6   8 4334.58 357.180  15
  -2   6   7 1366.27 138.545  38
  -2   6   7 1237.86 189.750  15
   2  -6  -7 1169.53 368.511   8
  -2   6   6 36218.8 1543.44  38
  -2   6   6 36659.1 1650.29  15
   2  -6  -6 35962.9 2250.52   8
  -2   6   5 5019.07 304.120  38
  -2   6   5 4281.75 350.325  15
   2  -6  -5 4109.24 629.703   8
  -2   6   5 5451.48 638.034   1
  -2   6   4 4576.04 295.620  38
   2  -6  -4 4508.09 648.134   8
  -2   6   3 18514.7 805.717  38
  -2   6   3 16111.0 843.461  15
   2  -6  -3 17773.0 1340.66   8
  -2   6   2 32133.3 1305.52  38
  -2   6   2 27443.1 1336.40  15
  -2   6   1 54393.8 2171.53  38
  -2   6   1 50684.0 2212.30  15
  -2   6   0 9209.94 526.413  15
  -2   6  -1 104959. 4190.27  15
  -2   6  -2 3833.25 269.414  38
  -2   6  -2 4167.34 295.977  15
   2  -6   3 89412.2 3578.02  35
  -2   6  -3 91541.0 3657.22  38
  -2   6  -3 99090.4 3690.22  15
   2  -6   4 21329.2 943.702  35
  -2   6  -4 23409.2 1016.37  38
  -2   6  -4 24942.0 1035.32  15
  -2   6  -5 41535.4 1642.14  38
   2  -6   5 36264.5 1569.74  35
  -2   6  -5 40954.8 1636.81  15
   2  -6   6 94826.4 3926.27  35
  -2   6  -6 99148.2 3958.64  15
   2  -6   7 18739.2 870.228  35
  -2   6  -7 21786.2 913.512  38
  -2   6  -7 19448.8 871.884  15
  -2   6  -8 80274.4 3053.13  38
   2  -6   8 73721.0 3033.86  35
   2  -6   9 3372.01 843.895   4
   2  -6   9 4435.37 655.068  31
   2  -6   9 5230.48 601.579  33
   2  -6   9 3948.51 595.702  23
  -2   6  -9 5207.69 316.024  38
   2  -6   9 4977.89 325.653  35
   2  -6  10 45693.2 2346.17  33
   2  -6  10 39736.3 2505.95  31
   2  -6  10 42664.4 1806.64  35
  -2   6 -10 44887.8 1769.58  38
   2  -6  11 171.233 162.402  33
   2  -6  11 334.355 244.497  31
   2  -6  11 84.8929 192.653  23
   2  -6  11 220.668 79.9447  35
   2  -6  12 13033.7 1841.65   6
   2  -6  12 13499.0 1325.93  31
   2  -6  12 16104.9 1213.01  33
   2  -6  12 13132.6 1228.22  23
   2  -6  12 14111.4 749.117  35
   2  -6  13 2518.56 824.713   6
   2  -6  13 2348.30 249.210  35
   2  -6  13 1767.85 475.515  23
   2  -6  13 2612.13 478.817  33
   2  -6  13 2135.35 543.436  31
   2  -6  14 13906.5 762.631  35
   2  -6  14 13298.6 1193.84  22
   2  -6  14 12412.6 1260.04  27
   2  -6  14 12647.4 1235.27  23
   2  -6  14 14397.0 1390.34  31
   2  -6  14 14589.7 1203.88  33
   2  -6  15 18842.1 966.141  35
   2  -6  15 18498.0 1561.25  27
   2  -6  15 17257.4 1487.02  23
   2  -6  15 19377.9 1476.00  22
   2  -6  15 18930.3 1647.84  31
   2  -6  16 16994.5 1400.05  22
   2  -6  16 19013.8 1506.84  27
   2  -6  16 16388.6 1423.60  23
   2  -6  16 16208.5 1539.50  31
   2  -6  17 8048.83 896.475  22
   2  -6  17 7922.16 906.069  27
   2  -6  17 7594.06 909.172  23
   2  -6  17 6662.19 947.538  31
   2  -6  17 7074.60 1019.15  30
   2  -6  18 8429.74 928.122  23
   2  -6  18 8847.36 1048.05  31
   2  -6  18 8592.68 1092.01  30
   2  -6  19 15165.5 1394.03  30
   2  -6  19 15896.0 1403.85  31
   2  -6  20 40385.3 2372.33  34
   2  -6  20 46443.8 2583.47  30
   2  -6  20 45818.8 2571.95  31
   2  -6  21 429.905 228.691  23
   2  -6  21 200.611 152.046  34
   2  -6  21 136.677 238.408  31
   2  -6  22 16319.5 992.943  23
   2  -6  22 11407.9 866.252  34
  -2   5  19 10058.8 693.800  37
  -2   5  18 13727.8 870.159  37
  -2   5  18 14304.4 1147.42  21
  -2   5  17 14238.8 1024.22  37
  -2   5  17 14024.9 1281.77  21
  -2   5  17 14570.9 1094.44  25
  -2   5  16 7705.00 992.649  21
  -2   5  16 8505.84 820.987  25
  -2   5  15 35966.6 2348.58  21
  -2   5  15 34237.1 1934.69  25
  -2   5  14 31282.3 1919.21  36
  -2   5  14 35494.8 2017.13  25
  -2   5  13 4003.78 554.602  36
  -2   5  13 4050.86 651.638  16
  -2   5  13 5336.76 652.911  25
  -2   5  12 5057.95 630.809  36
  -2   5  12 5716.17 758.123  16
  -2   5  12 6492.16 713.978  25
  -2   5  11 1346.81 317.654  36
  -2   5  11 1836.98 433.534  16
  -2   5  11 1762.64 373.032  25
  -2   5  10 7210.21 712.714  36
  -2   5  10 6810.15 801.524  16
  -2   5  10 7858.25 755.921  25
  -2   5  10 7988.24 905.164  26
  -2   5   9 3040.73 437.027  36
  -2   5   9 2696.83 490.328  16
  -2   5   9 3299.49 284.625  15
  -2   5   9 2877.48 542.725  26
  -2   5   9 3020.37 445.608  25
  -2   5   8 10684.2 523.508  38
  -2   5   8 10988.1 998.241  16
  -2   5   8 12396.8 648.538  15
  -2   5   7 3368.92 220.204  38
  -2   5   7 3348.69 286.002  15
  -2   5   6 6988.26 362.314  38
  -2   5   6 6254.44 419.320  15
  -2   5   5 40771.3 1614.85  38
  -2   5   5 36577.2 1673.83  15
  -2   5   4 11306.8 543.129  38
  -2   5   3 42485.4 1631.74  38
  -2   5   3 35605.9 1665.47  15
  -2   5   2 34371.2 1479.17  15
  -2   5   1 11498.0 593.472  15
  -2   5   0 14243.4 694.066  15
  -2   5  -1 92893.8 3691.25  15
  -2   5  -2 1395.84 150.616  15
   2  -5   3 118869. 4686.82  35
  -2   5  -3 127421. 4768.45  15
   2  -5   4 332.853 57.2166  35
  -2   5  -4 733.711 104.043  15
   2  -5   5 143291. 5619.96  35
  -2   5  -5 147976. 5651.84  15
   2  -5   6 11871.1 563.385  35
  -2   5  -6 13626.9 594.755  38
  -2   5  -6 11868.5 562.520  15
   2  -5   7 103286. 4253.97  35
  -2   5  -7 104597. 4220.28  15
  -2   5  -8 855.239 105.956  38
   2  -5   8 596.561 95.3911  35
  -2   5  -9 106015. 3995.35  38
   2  -5   9 96107.6 4029.75  35
   2  -5   9 100599. 4515.03  33
  -2   5 -10 4193.73 239.759  38
   2  -5  10 3002.58 253.589  35
   2  -5  10 3342.66 577.873  31
   2  -5  10 3540.70 482.767  33
   2  -5  11 45485.6 1868.56  35
   2  -5  11 49875.9 3643.90   6
   2  -5  11 40593.8 2545.83  31
   2  -5  11 43980.4 2350.58  33
   2  -5  11 43528.4 2399.81  22
   2  -5  12 267.159 96.1500  35
   2  -5  12 108.958 394.287   6
   2  -5  12 489.451 276.105  31
   2  -5  12 208.571 171.646  33
   2  -5  12 124.566 179.795  23
   2  -5  12 335.641 228.250  22
   2  -5  13 21026.0 2331.24   6
   2  -5  13 18023.3 1379.78  33
   2  -5  13 17874.2 1578.48  31
   2  -5  13 16286.6 1430.98  23
   2  -5  13 20864.4 1526.89  22
   2  -5  13 20623.2 996.961  35
   2  -5  14 786.813 533.224   6
   2  -5  14 841.404 156.222  35
   2  -5  14 779.138 349.195  27
   2  -5  14 472.767 257.859  22
   2  -5  14 780.691 315.352  23
   2  -5  14 768.067 353.092  31
   2  -5  14 947.097 306.665  33
   2  -5  15 4800.00 387.981  35
   2  -5  15 4375.84 713.158  23
   2  -5  15 5060.61 776.234  27
   2  -5  15 5250.47 736.223  22
   2  -5  15 4062.17 729.722  31
   2  -5  16 7806.11 557.549  35
   2  -5  16 9792.76 1038.56  22
   2  -5  16 10186.7 1094.94  27
   2  -5  16 8797.56 1001.65  23
   2  -5  16 7725.44 1096.13  30
   2  -5  16 9234.22 1114.38  31
   2  -5  17 26165.3 1845.05  22
   2  -5  17 28354.1 1911.61  27
   2  -5  17 23113.8 1973.06  30
   2  -5  17 21050.4 1837.22  31
   2  -5  18 491.602 293.521  22
   2  -5  18 480.952 274.455  27
   2  -5  18 594.960 381.923  30
   2  -5  18 217.549 288.483  31
   2  -5  19 30128.3 1987.23  22
   2  -5  19 29279.3 1965.08  23
   2  -5  19 30816.3 2179.68  30
   2  -5  20 38.0443 187.566  23
   2  -5  20 45.7792 197.952  30
   2  -5  21 8821.18 834.543  23
   2  -5  22 17911.3 1278.16  31
  -2   4  20 10908.8 765.608  37
  -2   4  19 747.647 216.147  37
  -2   4  19 1559.88 567.242  25
  -2   4  18 42721.5 2545.63  21
  -2   4  18 45534.7 2296.73  25
  -2   4  17 2374.51 576.694  21
  -2   4  17 2761.00 486.440  25
  -2   4  16 42003.2 2476.60  36
  -2   4  16 46212.3 2941.81  21
  -2   4  16 50836.0 2768.94  16
  -2   4  16 51413.3 2630.14  25
  -2   4  15 605.705 234.436  36
  -2   4  15 359.382 281.459  20
  -2   4  15 711.837 363.248  21
  -2   4  15 367.180 266.954  16
  -2   4  15 522.967 355.845  14
  -2   4  15 526.339 257.751  25
  -2   4  14 34354.9 2078.62  36
  -2   4  14 33538.7 2347.47  20
  -2   4  13 34.0650 131.778  36
  -2   4  13 149.481 215.469  20
  -2   4  13 292.154 199.760  25
  -2   4  13-147.794 426.044  26
  -2   4  12 48997.8 2651.03  36
  -2   4  12 46132.7 2883.20  20
  -2   4  12 56918.9 3038.09  26
  -2   4  12 56415.9 2817.86  25
  -2   4  11 7851.06 764.237  36
  -2   4  11 7950.93 905.668  20
  -2   4  11 7112.26 828.320  16
  -2   4  11 8915.39 841.445  25
  -2   4  11 9138.33 955.511  26
  -2   4  10 11448.3 918.557  36
  -2   4  10 11118.7 1019.73  16
  -2   4  10 11010.5 1082.42  20
  -2   4  10 13076.2 1128.38  26
  -2   4  10 13246.7 1012.87  25
  -2   4   9 2173.43 351.564  36
  -2   4   9 1993.21 399.477  16
  -2   4   9 2551.30 233.802  15
  -2   4   9 2966.78 480.126  26
  -2   4   9 2858.35 414.848  25
  -2   4   8 21823.4 967.043  38
  -2   4   8 25434.9 1088.04  15
  -2   4   8 24402.0 997.062  11
  -2   4   7 9039.13 436.303  38
  -2   4   7 9804.11 520.063  15
  -2   4   6 25225.5 1053.12  38
  -2   4   6 25365.9 1130.21  15
  -2   4   5 28180.1 1230.98  15
  -2   4   3 15942.7 738.344  15
  -2   4   2 15910.8 738.486  15
  -2   4   1 38448.4 1602.79  15
  -2   4   0 177147. 6879.12  15
  -2   4  -1 31509.4 1313.35  15
   2  -4   2 163935. 6448.92  35
  -2   4  -2 181092. 6526.16  15
   2  -4   3 3946.88 199.538  35
  -2   4  -3 4093.98 239.725  15
   2  -4   4 443874. 16942.1  35
  -2   4  -4 441876. 16965.8  15
   2  -4   5 45953.4 1825.56  35
  -2   4  -5 45701.1 1824.38  15
   2  -4   6 242202. 9407.48  35
  -2   4  -6 245828. 9376.47  15
   2  -4   7 164368. 6383.95  35
  -2   4  -8 53444.1 2086.33  38
   2  -4   8 50515.3 2126.45  35
   2  -4   9 17173.0 820.074  35
  -2   4  -9 17673.8 759.874  38
   2  -4   9 18724.5 1201.69  37
   2  -4  10 39512.5 1717.12  35
   2  -4  10 43244.0 2193.29  37
   2  -4  11 6254.25 665.664  37
   2  -4  11 6114.69 398.631  35
   2  -4  11 5873.08 830.853  20
   2  -4  11 5208.51 742.375  31
   2  -4  11 6743.51 729.134  22
   2  -4  11 4617.82 639.966  23
   2  -4  12 537.639 464.978   6
   2  -4  12-32.6708 126.489  37
   2  -4  12 156.559 82.6855  35
   2  -4  12 716.545 673.612  21
   2  -4  12 222.868 274.749  20
   2  -4  12 553.624 289.141  31
   2  -4  12 320.785 201.089  24
   2  -4  12 187.111 177.352  22
   2  -4  12 192.171 182.143  23
   2  -4  13 18391.0 2185.68   6
   2  -4  13 19630.7 1386.39  37
   2  -4  13 19958.3 959.140  35
   2  -4  13 20157.0 1763.65  20
   2  -4  13 16549.5 1634.15  21
   2  -4  13 15412.2 1449.17  31
   2  -4  13 18585.0 1335.24  24
   2  -4  13 17232.4 1502.36  27
   2  -4  13 18956.2 1456.69  22
   2  -4  13 15667.8 1359.61  23
   2  -4  14 4772.19 389.196  35
   2  -4  14 5927.18 718.543  37
   2  -4  14 4470.18 1121.27  21
   2  -4  14 5514.13 934.586  20
   2  -4  14 4321.30 744.902  31
   2  -4  14 4476.55 735.223  27
   2  -4  14 5242.57 653.313  24
   2  -4  14 5359.21 749.924  22
   2  -4  15 21468.8 1538.00  37
   2  -4  15 19750.4 1038.97  35
   2  -4  15 20731.5 1914.40  20
   2  -4  15 16464.2 1577.19  31
   2  -4  15 19232.9 1777.80  30
   2  -4  15 22283.6 1491.81  24
   2  -4  15 20935.3 1686.27  27
   2  -4  15 20759.1 1609.99  22
   2  -4  16 7125.17 838.560  37
   2  -4  16 6139.45 1201.71  20
   2  -4  16 6594.23 887.721  27
   2  -4  16 6185.98 851.249  22
   2  -4  16 5695.04 684.063  29
   2  -4  16 8123.68 1079.11  30
   2  -4  17 3396.07 631.183  23
   2  -4  17 2689.57 579.074  22
   2  -4  17 2959.73 595.166  27
   2  -4  17 3331.80 710.388  30
   2  -4  17 3001.77 492.254  29
   2  -4  18 18927.1 1588.90  22
   2  -4  18 20295.4 1602.87  23
   2  -4  18 20194.1 1757.52  30
   2  -4  19 531.401 278.518  23
   2  -4  19 768.087 339.230  22
   2  -4  19 899.042 399.950  30
   2  -4  19 491.711 343.182  31
   2  -4  19 606.842 255.198  28
   2  -4  20 5607.50 721.945  23
   2  -4  20 5916.33 811.552  30
   2  -4  20 4829.80 777.005  31
   2  -4  21 465.179 241.309  23
   2  -4  21 699.399 328.675  31
   2  -4  22 12330.8 1031.07  31
  -2   3  21 12054.5 826.914  37
  -2   3  20 25.0769 123.630  37
  -2   3  20-317.374 611.576  25
  -2   3  19 14207.3 1097.23  37
  -2   3  19 16818.3 1285.08  25
  -2   3  18 719.994 323.486  20
  -2   3  18 742.349 377.799  21
  -2   3  18 771.369 356.672  25
  -2   3  17 7973.88 1040.77  21
  -2   3  17 5764.00 901.221  20
  -2   3  17 8656.69 872.700  25
  -2   3  16 1105.11 316.175  36
  -2   3  16 2376.02 610.722  21
  -2   3  16 1456.18 488.114  20
  -2   3  16 1926.29 534.433  14
  -2   3  16 1869.17 420.120  25
  -2   3  15 48311.7 2683.32  36
  -2   3  15 55021.4 2953.37  16
  -2   3  15 49011.1 3105.05  21
  -2   3  15 48091.6 3064.81  20
  -2   3  15 57505.7 3273.93  14
  -2   3  15 42783.0 2639.37  22
  -2   3  15 52797.1 3062.65  26
  -2   3  15 57917.5 2877.41  25
  -2   3  14 2566.73 460.865  36
  -2   3  14 2866.06 530.676  16
  -2   3  14 2704.43 631.652  21
  -2   3  14 2765.42 607.706  20
  -2   3  14 2996.47 506.416  25
  -2   3  14 2964.00 610.182  26
  -2   3  14 1624.63 386.247  22
  -2   3  13 23075.4 1523.83  36
  -2   3  13 24635.1 1706.39  16
  -2   3  13 23859.4 1821.65  20
  -2   3  13 24588.4 1764.31  26
  -2   3  13 19539.0 1494.23  22
  -2   3  13 23396.9 1573.49  25
  -2   3  12 4002.98 528.322  36
  -2   3  12 4569.11 705.835  20
  -2   3  12 4295.88 630.757  16
  -2   3  12 4458.82 667.904  26
  -2   3  12 4860.80 610.004  25
  -2   3  11 69180.2 3423.56  36
  -2   3  11 75985.1 3823.97  20
  -2   3  11 79632.3 3788.41  26
  -2   3  11 74691.4 3553.53  25
  -2   3  10 48629.2 2481.55  36
  -2   3  10 54356.9 2764.82  26
  -2   3   9 64646.2 2998.86  36
  -2   3   8 9323.93 440.978  38
  -2   3   8 10398.2 459.410  11
  -2   3   7 21586.5 918.815  11
  -2   3   7 22768.0 986.424  15
  -2   3   6 2568.07 204.292  15
  -2   3   5 5162.72 308.420  15
   2  -3  -4 179.428 39.8194  32
   2  -3  -3 140024. 5396.21  32
   2  -3  -2 106778. 3996.89  32
  -2   3   2 97870.7 4029.34  15
   2  -3  -1 61058.1 2365.54  32
  -2   3   1 59533.5 2399.53  15
   2  -3   0 348.966 49.1612  32
  -2   3   0 363.590 64.7873  15
   2  -3   1 270463. 9540.09  32
  -2   3  -1 290300. 9568.77  15
   2  -3   2 24555.0 997.069  35
  -2   3  -2 27721.1 1045.99  15
   2  -3   3 234834. 8266.74  32
  -2   3  -3 219557. 8264.25  15
   2  -3   4 234746. 8457.99  32
   2  -3   4 208586. 8449.93  35
  -2   3  -4 219249. 8445.71  15
   2  -3   5 107305. 4180.43  32
   2  -3   5 106847. 4198.63  35
  -2   3  -5 109312. 4165.66  15
   2  -3   6 149100. 5781.33  35
   2  -3   7 144482. 5626.85  35
  -2   3  -8 73555.9 2892.14  11
   2  -3   8 74977.1 2965.66  35
   2  -3   9 70341.3 3317.05  37
   2  -3   9 77098.6 2935.64  35
  -2   3  -9 71400.6 2819.57  38
  -2   3  -9 72421.9 2824.49  11
   2  -3   9 67310.6 3279.55  33
   2  -3  10 35746.0 2076.60  33
   2  -3  10 42352.6 1737.15  35
   2  -3  10 38896.2 2107.48  37
   2  -3  11 1411.04 320.656  33
   2  -3  11 1326.85 311.012  37
   2  -3  11 1640.19 188.629  35
   2  -3  12 13450.5 1065.62  37
   2  -3  12 13783.8 728.042  35
   2  -3  12 12953.3 1312.72  20
   2  -3  12 12050.1 1045.55  24
   2  -3  12 13665.9 1231.11  27
   2  -3  12 13563.7 1141.71  22
   2  -3  13 1924.97 228.667  35
   2  -3  13 1712.15 375.424  37
   2  -3  13 1924.13 486.953  21
   2  -3  13 2244.09 544.024  20
   2  -3  13 1941.79 479.294  27
   2  -3  13 2171.76 431.605  24
   2  -3  13 1325.71 336.211  26
   2  -3  13 2069.28 435.538  22
   2  -3  14 15917.6 860.629  35
   2  -3  14 15929.5 1258.89  37
   2  -3  14 15558.5 1395.64  21
   2  -3  14 16631.6 1577.43  20
   2  -3  14 14617.7 1486.82  30
   2  -3  14 14228.9 1197.27  26
   2  -3  14 15017.2 1241.01  24
   2  -3  14 18591.3 1409.00  22
   2  -3  14 15037.7 1402.62  27
   2  -3  15 12220.8 1096.99  37
   2  -3  15 11418.7 1256.03  21
   2  -3  15 13929.3 1436.24  20
   2  -3  15 11144.7 1313.47  30
   2  -3  15 11592.2 1260.70  31
   2  -3  15 13938.2 1307.86  27
   2  -3  15 9640.87 981.063  26
   2  -3  15 12718.3 1189.56  22
   2  -3  15 11610.3 1165.25  23
   2  -3  15 9891.76 880.283  25
   2  -3  16 9321.86 950.369  37
   2  -3  16 8806.77 1226.15  20
   2  -3  16 10222.7 1309.53  21
   2  -3  16 8522.23 895.809  29
   2  -3  16 7779.14 1039.10  31
   2  -3  16 9611.11 1195.23  30
   2  -3  16 9948.01 1110.39  27
   2  -3  16 10650.6 1088.55  22
   2  -3  16 10663.7 1094.94  23
   2  -3  16 7353.92 847.068  26
   2  -3  16 7879.95 771.243  25
   2  -3  17 2131.20 451.315  37
   2  -3  17 2982.39 1134.10  21
   2  -3  17 2304.61 773.652  20
   2  -3  17 2596.53 592.377  31
   2  -3  17 1746.32 528.751  30
   2  -3  17 1910.56 413.688  29
   2  -3  17 1829.23 349.161  25
   2  -3  17 1901.95 468.263  23
   2  -3  17 2838.18 578.746  22
   2  -3  17 1632.11 394.297  26
   2  -3  18 3650.73 623.987  37
   2  -3  18 3775.67 1123.29  20
   2  -3  18 4569.19 745.852  22
   2  -3  18 5038.83 734.486  23
   2  -3  18 3837.33 745.452  31
   2  -3  18 4782.86 755.360  34
   2  -3  18 4741.58 620.253  29
   2  -3  18 4499.30 672.436  28
   2  -3  18 4656.80 809.541  30
   2  -3  19 1058.91 372.378  37
   2  -3  19 980.744 353.421  23
   2  -3  19 1910.16 474.858  22
   2  -3  19 1106.58 344.224  28
   2  -3  19 1233.88 378.783  34
   2  -3  19 1486.26 477.851  30
   2  -3  19 1498.24 441.591  31
   2  -3  20 4407.23 630.882  23
   2  -3  20 3852.85 619.476  34
   2  -3  20 3910.04 671.760  30
   2  -3  20 3048.44 600.072  31
   2  -3  21 3614.19 561.093  34
   2  -3  21 3970.28 614.235  31
   2  -3  22 4022.83 526.771  34
  -2   2  22 14177.9 905.919  37
  -2   2  21 315.562 159.631  37
  -2   2  20 2103.30 382.137  37
  -2   2  20 2444.55 528.036  20
  -2   2  20 3466.67 793.568  25
  -2   2  19 1693.66 362.509  37
  -2   2  19 1610.04 584.533  25
  -2   2  19 891.370 384.407  20
  -2   2  18 15196.2 1218.05  25
  -2   2  18 11872.8 1354.00  20
  -2   2  18 14339.6 1405.65  21
  -2   2  17-177.796 313.853  21
  -2   2  17 315.341 310.930  20
  -2   2  17-54.6323 289.319  14
  -2   2  17-39.4566 186.895  25
  -2   2  17-42.5189 174.419  22
  -2   2  16 12000.1 1072.33  36
  -2   2  16 12911.5 1386.84  20
  -2   2  16 12359.3 1325.29  21
  -2   2  16 13807.3 1387.65  14
  -2   2  16 13655.0 1362.18  26
  -2   2  16 13844.1 1153.33  25
  -2   2  16 10117.5 1078.26  22
  -2   2  15 216.871 178.492  36
  -2   2  15 599.215 292.798  16
  -2   2  15 115.239 273.115  21
  -2   2  15 181.435 274.458  20
  -2   2  15 59.2304 256.313  14
  -2   2  15 424.553 230.263  25
  -2   2  15 556.064 255.145  22
  -2   2  15 200.482 265.621  26
  -2   2  14 1487.81 340.092  36
  -2   2  14 1927.04 435.818  16
  -2   2  14 1687.13 514.562  21
  -2   2  14 2426.85 576.233  20
  -2   2  14 1740.44 499.914  14
  -2   2  14 1685.31 387.372  25
  -2   2  14 1797.99 448.585  26
  -2   2  14 1798.09 416.061  22
  -2   2  13 25697.7 1596.36  36
  -2   2  13 26075.0 1734.16  16
  -2   2  13 26362.0 1931.21  20
  -2   2  13 25659.7 1915.33  21
  -2   2  13 28098.5 1850.95  26
  -2   2  13 26397.7 1665.39  25
  -2   2  13 21837.5 1641.30  22
  -2   2  12 49406.3 2575.78  36
  -2   2  12 48799.7 2709.94  16
  -2   2  12 57900.7 3056.02  20
  -2   2  12 58569.9 2831.90  29
  -2   2  12 42797.2 2634.37  22
  -2   2  12 55395.0 2882.85  26
  -2   2  12 53273.5 2685.65  25
  -2   2  11 43237.6 2368.95  36
  -2   2  11 47047.7 2562.49  16
  -2   2  11 53456.4 2634.10  29
  -2   2  11 50822.7 2521.80  25
  -2   2  11 52943.5 2699.00  26
  -2   2  10 71284.1 2822.84  35
  -2   2  10 62715.1 3113.54  36
  -2   2   9 12442.5 615.031  35
  -2   2   9 11787.0 827.285  36
  -2   2   9 10120.1 918.837  34
  -2   2   8 24790.9 1001.29  11
  -2   2   8 25258.1 1090.35  35
  -2   2   7 27379.6 1194.02  35
   2  -2  -7 27814.3 1122.69  32
  -2   2   7 29680.1 1142.69  11
  -2   2   6 13229.3 569.794  15
   2  -2  -6 11705.3 496.181  32
  -2   2   6 12798.1 519.392  11
  -2   2   5 12679.8 542.651  15
  -2   2   5 12260.4 501.818  11
   2  -2  -5 11470.1 478.812  32
   2  -2  -4 26708.5 968.744  32
  -2   2   4 21285.9 971.508  35
   2  -2  -3 10398.0 446.488  32
   2  -2  -2 85307.4 2651.79  32
  -2   2   2 54579.4 2625.30  15
   2  -2  -1 47664.6 1783.36  32
  -2   2   1 42571.6 1790.74  15
   2  -2   0 162295. 6072.79  32
  -2   2   0 153122. 6078.24  15
  -2   2  -1 402172. 15378.3  15
   2  -2   2 49251.3 2043.34  35
  -2   2  -2 59192.7 2068.63  15
   2  -2   3 152760. 6785.23  35
   2  -2   3 213579. 6809.21  32
   2  -2   4 26107.0 1113.52  35
   2  -2   4 28537.0 1098.90  32
   2  -2   5 230072. 8923.11  35
   2  -2   5 232737. 8878.92  32
   2  -2   6 23411.6 1006.73  35
  -2   2  -6 24074.2 956.691  11
   2  -2   6 23247.7 943.462  32
   2  -2   7 53102.3 2005.76  35
  -2   2  -7 52479.3 1925.90  11
  -2   2  -8 95415.1 3722.33  11
   2  -2   8 99248.8 3826.51  35
   2  -2   9 17986.5 847.467  35
   2  -2  10 1546.16 310.030  33
   2  -2  10 2228.42 211.748  35
   2  -2  10 1717.62 304.522  37
   2  -2  11 89963.0 4560.98  37
   2  -2  11 111322. 4237.08  35
   2  -2  12 11643.3 639.687  35
   2  -2  12 9754.78 879.002  37
   2  -2  12 10107.5 1116.34  20
   2  -2  12 11167.2 1083.00  31
   2  -2  12 10496.5 1123.17  30
   2  -2  12 10551.4 976.712  24
   2  -2  12 11994.9 1038.95  22
   2  -2  12 10152.7 1055.60  27
   2  -2  12 10473.9 989.206  23
   2  -2  13 110541. 5128.84  37
   2  -2  13 123067. 4671.90  35
   2  -2  13 118157. 5427.81  21
   2  -2  13 111941. 5607.00  30
   2  -2  13 112584. 5492.62  31
   2  -2  13 117996. 5309.08  24
   2  -2  13 111864. 5333.93  23
   2  -2  13 109518. 5270.66  26
   2  -2  13 99089.0 5003.08  25
   2  -2  13 121916. 5547.17  27
   2  -2  13 118337. 5363.85  22
   2  -2  14 14249.0 1104.79  37
   2  -2  14 12220.8 1195.15  21
   2  -2  14 14391.3 1327.58  27
   2  -2  14 11553.1 1300.81  30
   2  -2  14 13829.7 1305.79  31
   2  -2  14 12262.0 1159.79  23
   2  -2  14 12664.2 1155.36  26
   2  -2  14 13769.8 1182.66  24
   2  -2  14 13104.5 1193.64  22
   2  -2  14 10341.5 965.579  25
   2  -2  15 5688.79 699.250  37
   2  -2  15 6491.28 850.322  21
   2  -2  15 8259.22 978.287  27
   2  -2  15 6467.22 968.237  30
   2  -2  15 5412.05 843.115  31
   2  -2  15 4979.84 735.223  26
   2  -2  15 4586.41 618.685  25
   2  -2  15 5957.31 798.216  23
   2  -2  15 6364.21 826.330  22
   2  -2  16 7413.15 819.206  37
   2  -2  16 8466.24 993.788  34
   2  -2  16 6811.22 915.822  21
   2  -2  16 8140.98 1013.68  31
   2  -2  16 7970.24 1077.07  30
   2  -2  16 5673.04 780.707  29
   2  -2  16 7780.47 949.966  22
   2  -2  16 8846.60 977.305  23
   2  -2  16 7489.66 884.757  26
   2  -2  16 6832.01 757.193  25
   2  -2  17 3250.50 542.429  37
   2  -2  17 3121.29 640.916  21
   2  -2  17 2492.32 545.561  22
   2  -2  17 2702.18 468.019  25
   2  -2  17 3100.98 575.732  26
   2  -2  17 2654.67 549.309  23
   2  -2  17 3491.90 673.147  31
   2  -2  17 3797.18 751.067  30
   2  -2  17 4092.56 688.305  34
   2  -2  17 3330.67 560.874  29
   2  -2  17 3566.04 641.359  28
   2  -2  18 12949.8 1138.55  37
   2  -2  18 15526.6 1326.22  23
   2  -2  18 11898.6 1143.99  26
   2  -2  18 12848.2 1052.34  25
   2  -2  18 15019.3 1338.66  22
   2  -2  18 10835.1 1070.06  29
   2  -2  18 13390.3 1293.97  34
   2  -2  18 15889.0 1531.02  30
   2  -2  18 11725.6 1274.12  31
   2  -2  18 13872.2 1269.45  28
   2  -2  19 2628.10 468.800  37
   2  -2  19 2264.77 465.303  26
   2  -2  19 2566.54 466.430  29
   2  -2  19 2219.23 569.821  30
   2  -2  19 2839.31 592.569  31
   2  -2  19 3375.92 566.203  28
   2  -2  19 2596.76 536.806  34
   2  -2  20 1474.28 428.077  30
   2  -2  20 1486.75 404.376  34
   2  -2  20 1100.52 321.380  28
   2  -2  20 1148.71 380.756  31
   2  -2  20 1409.24 324.539  29
   2  -2  20 1594.34 370.964  37
   2  -2  21 1984.49 415.171  34
  -2   1  23 2744.61 319.724  37
  -2   1  23 2080.96 601.215  21
  -2   1  22 10808.3 1020.52  20
  -2   1  21 8096.66 973.501  20
  -2   1  20 3776.20 584.967  22
  -2   1  20 3254.53 711.403  20
  -2   1  19 24113.7 1758.05  22
  -2   1  19 27682.8 2139.46  20
  -2   1  18 1042.12 371.053  14
  -2   1  18 779.190 377.512  25
  -2   1  18 420.396 272.127  22
  -2   1  18 935.011 419.228  20
  -2   1  18 412.058 342.401  21
  -2   1  17 2774.92 623.342  14
  -2   1  17 2474.87 536.820  22
  -2   1  17 3312.64 826.622  26
  -2   1  17 2458.58 487.015  25
  -2   1  17 3038.90 644.773  21
  -2   1  17 2900.79 698.054  20
  -2   1  16 1692.61 513.401  14
  -2   1  16 1436.50 378.626  25
  -2   1  16 961.130 369.192  22
  -2   1  16 1678.16 524.377  26
  -2   1  16 1571.16 479.965  21
  -2   1  16 853.030 423.736  20
  -2   1  15 35361.2 2415.90  14
  -2   1  15 35687.1 2483.77  20
  -2   1  15 34227.2 2369.18  21
  -2   1  15 32442.4 2209.80  34
  -2   1  15 37498.0 2323.51  26
  -2   1  15 34218.0 2054.49  25
  -2   1  15 30116.8 2130.42  22
  -2   1  14 54709.1 2180.32  35
  -2   1  14 49135.8 3006.56  14
  -2   1  14 41847.8 2825.66  21
  -2   1  14 48816.6 3017.79  20
  -2   1  14 48569.4 2686.92  29
  -2   1  14 44707.9 2762.04  34
  -2   1  14 40975.3 2678.92  22
  -2   1  14 51358.3 2886.52  26
  -2   1  14 50383.8 2654.05  25
  -2   1  13 62159.5 3441.91  14
  -2   1  13 65575.9 2591.43  35
  -2   1  13 62654.8 3438.44  20
  -2   1  13 56238.1 3288.70  21
  -2   1  13 59108.0 3082.47  16
  -2   1  13 54811.4 3157.21  34
  -2   1  13 63932.9 3131.01  29
  -2   1  13 62903.8 3274.25  26
  -2   1  13 57609.0 3009.61  25
  -2   1  13 54310.4 3128.48  22
  -2   1  12 44201.5 1837.74  35
  -2   1  12 38844.9 2253.64  16
  -2   1  12 46230.6 2619.08  20
  -2   1  12 37568.9 2427.04  21
  -2   1  12 43469.4 2306.14  29
  -2   1  12 38340.3 2344.89  34
  -2   1  12 41919.7 2242.44  25
  -2   1  11 24175.6 1669.36  34
  -2   1  11 25080.7 1543.34  36
  -2   1  10 23366.1 1554.85  34
  -2   1  10 28362.8 1201.09  35
  -2   1  10 24465.4 1444.07  36
  -2   1   9 1235.26 146.356  35
   2  -1  -8 36384.5 1457.34  32
  -2   1   8 44637.9 1582.48  35
   2  -1  -7 227.546 30.9538  32
  -2   1   7 265.145 39.4480  11
  -2   1   6 88635.8 3428.87   2
   2  -1  -6 95346.0 3455.20  32
  -2   1   6 89648.2 3462.90  11
  -2   1   6 83134.9 3499.69  35
   2  -1  -5 5145.08 240.063  32
  -2   1   5 4661.04 261.732  35
  -2   1   4 74529.4 2758.59   2
   2  -1  -4 71128.6 2759.41  32
  -2   1   4 76539.4 2777.84  11
   2  -1  -3 13027.4 529.702  32
  -2   1   3 12038.3 527.136  35
   2  -1  -2 1875.79 107.294  32
  -2   1   2 2115.36 100.988  35
   2  -1  -1 33698.0 1320.92  32
   2  -1   0 33627.7 1407.30  32
  -2   1   0 39734.4 1425.67  11
  -2   1  -1 5318.27 248.402  11
   2  -1   2 43593.0 1780.65  32
  -2   1  -2 49062.7 1797.65  11
   2  -1   3 3778.93 177.459  32
  -2   1  -3 3746.21 188.931  11
   2  -1   4 117471. 4677.85  32
  -2   1  -4 128467. 4694.24  11
   2  -1   4 121555. 4724.56  35
   2  -1   5 106325. 4149.55  32
  -2   1  -5 109758. 4161.98  11
   2  -1   5 108899. 4216.28  35
  -2   1  -6 5168.90 257.750  11
   2  -1   6 5119.41 312.445  35
   2  -1   7 4727.03 210.165  32
  -2   1  -7 4584.30 218.226  11
   2  -1   7 5119.81 303.779  35
   2  -1   8 109984. 3973.65  35
   2  -1   8 98334.9 3819.39  32
   2  -1   9 13061.9 666.444  35
   2  -1  10 270001. 11955.7  37
  -2   1 -10 305115. 11517.6   2
   2  -1  11 8694.12 760.528  37
   2  -1  12 104899. 4685.44  37
   2  -1  12 109088. 5227.99  20
   2  -1  12 117016. 5136.19  27
   2  -1  12 111143. 5213.10  30
   2  -1  12 103197. 4974.52  31
   2  -1  12 109451. 4909.77  23
   2  -1  12 101482. 4916.85  26
   2  -1  12 113642. 4936.17  24
   2  -1  13 1109.14 281.587  37
   2  -1  13 1707.45 500.618  20
   2  -1  13 1307.60 357.169  17
   2  -1  13 1422.98 389.607  21
   2  -1  13 741.846 332.912  31
   2  -1  13 1495.26 481.324  30
   2  -1  13 1546.91 392.588  23
   2  -1  13 1191.16 322.628  25
   2  -1  13 1169.09 391.340  27
   2  -1  13 1436.32 395.720  24
   2  -1  13 1375.22 379.320  26
   2  -1  14 78206.0 3921.79  34
   2  -1  14 73457.4 3633.42  37
   2  -1  14 72320.9 4141.04  20
   2  -1  14 72441.4 3898.96  21
   2  -1  14 82494.5 4105.34  27
   2  -1  14 74884.5 3962.03  31
   2  -1  14 78993.7 4199.74  30
   2  -1  14 72205.6 3856.56  26
   2  -1  14 68944.8 3647.80  25
   2  -1  14 81192.1 3906.97  23
   2  -1  15 292.923 194.114  37
   2  -1  15 347.759 288.342  21
   2  -1  15 329.170 360.184  20
   2  -1  15 251.259 297.667  30
   2  -1  15 487.901 275.213  28
   2  -1  15 127.912 154.512  29
   2  -1  15 157.264 248.464  31
   2  -1  15 49.9040 167.388  34
   2  -1  15 648.990 255.884  25
   2  -1  15 144.086 197.222  26
   2  -1  15 371.491 284.099  23
   2  -1  16 28060.2 1863.32  37
   2  -1  16 30048.8 2101.42  21
   2  -1  16 28692.6 2309.94  20
   2  -1  16 29258.0 2067.91  28
   2  -1  16 28502.3 2058.89  34
   2  -1  16 29991.6 1986.42  29
   2  -1  16 32218.3 2337.29  30
   2  -1  16 27714.4 2085.38  31
   2  -1  16 31199.7 2142.86  22
   2  -1  16 28763.0 2057.97  26
   2  -1  16 33489.3 2126.46  23
   2  -1  16 30447.8 1920.26  25
   2  -1  17 8581.86 912.552  37
   2  -1  17 9475.33 1074.59  21
   2  -1  17 9881.41 1260.21  20
   2  -1  17 10612.2 1127.82  34
   2  -1  17 10047.3 1030.72  29
   2  -1  17 11372.9 1298.33  30
   2  -1  17 9809.41 1128.60  31
   2  -1  17 11611.6 1159.97  28
   2  -1  17 10673.9 1097.78  23
   2  -1  17 8990.31 1042.23  26
   2  -1  17 10513.7 1129.79  22
   2  -1  17 9055.30 927.212  25
   2  -1  18 4809.92 651.461  37
   2  -1  18 4160.27 921.208  20
   2  -1  18 5143.00 661.659  25
   2  -1  18 5618.60 814.389  22
   2  -1  18 5180.25 765.003  26
   2  -1  18 5509.70 793.260  34
   2  -1  18 5733.03 751.219  29
   2  -1  18 4758.88 837.637  30
   2  -1  18 5636.95 787.871  28
   2  -1  18 6339.43 856.126  31
   2  -1  19 653.322 250.966  37
   2  -1  19 1071.51 299.650  25
   2  -1  19 1131.14 353.472  26
   2  -1  19 804.078 293.360  29
   2  -1  19 1214.79 428.375  30
   2  -1  19 709.752 298.314  34
   2  -1  19 821.810 309.076  28
   2  -1  20 17508.4 1230.50  37
   2  -1  20 15828.0 1287.37  26
   2  -1  20 17692.1 1331.71  28
   2  -1  20 17485.2 1271.00  29
   2  -1  21 3399.49 468.825  29
   2  -1  21 3951.13 506.209  37
  -2   0  23 7763.52 612.217  37
  -2   0  23 6909.72 783.199  20
  -2   0  22 4388.77 580.253  22
  -2   0  22 5326.18 558.733  37
  -2   0  21 6451.90 780.705  22
  -2   0  21 5573.56 646.422  37
  -2   0  20 5095.56 752.260  22
  -2   0  20 4876.20 1013.13  25
  -2   0  20 6284.17 720.409  37
  -2   0  19 8534.72 1030.19  22
  -2   0  19 10567.5 1228.08  25
  -2   0  19 10464.0 986.507  37
  -2   0  18 5998.54 753.591  37
  -2   0  18 7110.63 922.907  25
  -2   0  18 5001.06 806.891  22
  -2   0  18 5592.51 819.375  34
  -2   0  17 34694.8 2384.11  21
  -2   0  17 36565.5 2412.54  14
  -2   0  17 30733.4 2167.24  34
  -2   0  17 30647.0 2192.80  22
  -2   0  17 31573.1 2057.92  25
  -2   0  16 63605.9 2550.56  35
  -2   0  16 52486.6 3309.71  21
  -2   0  16 61145.2 3472.99  14
  -2   0  16 47381.9 3016.93  31
  -2   0  16 58247.8 3286.88  34
  -2   0  16 57381.2 3246.13  26
  -2   0  16 54383.3 3221.85  22
  -2   0  15 142999. 5296.48  35
  -2   0  15 129980. 5798.28  36
  -2   0  15 132967. 6243.18  21
  -2   0  15 138549. 6358.86  14
  -2   0  15 128230. 6280.27  20
  -2   0  15 110648. 5857.56  31
  -2   0  15 120508. 5740.32  29
  -2   0  15 123527. 5987.73  34
  -2   0  15 122484. 6035.55  22
  -2   0  15 131602. 6045.13  26
  -2   0  14 3745.63 686.459  14
  -2   0  14 3307.66 494.789  36
  -2   0  14 3410.37 309.009  35
  -2   0  14 3098.45 626.437  20
  -2   0  14 2367.36 532.657  21
  -2   0  14 2958.13 537.769  34
  -2   0  14 1536.91 393.189  31
  -2   0  14 2160.59 408.824  29
  -2   0  14 2368.45 507.222  22
  -2   0  14 3019.00 549.151  26
  -2   0  13 88045.0 4219.15  36
  -2   0  13 104407. 3850.13  35
  -2   0  13 86933.4 4523.78  21
  -2   0  13 92432.3 4669.99  14
  -2   0  13 93610.5 4654.58  20
  -2   0  13 89028.0 4238.00  29
  -2   0  13 88865.2 4432.75  34
  -2   0  13 92766.3 4452.00  26
  -2   0  13 82881.4 4423.80  22
  -2   0  12 1831.98 383.623  34
  -2   0  12 2477.20 378.652  36
  -2   0  12 2072.00 225.283  35
  -2   0  11 70188.8 3627.15  34
  -2   0  11 70850.2 3489.40  36
  -2   0  10 8090.17 455.352  35
  -2   0   9 218258. 8459.19  35
   2   0  -8 5460.72 242.068  32
  -2   0   8 6251.30 325.703  35
  -2   0   7 1271.57 84.3363  11
  -2   0   7 1061.92 110.768  35
  -2   0   6 564.668 73.0050  35
  -2   0   6 640.477 59.7063  11
  -2   0   6 746.741 58.9171   2
  -2   0   5 96455.7 4033.61  35
  -2   0   5 108354. 4013.90   2
  -2   0   5 105443. 4018.27  11
  -2   0   4 68623.8 2633.62   2
  -2   0   4 67311.2 2638.65  11
  -2   0   3 64594.2 2441.08   2
  -2   0   3 61119.3 2440.19  11
  -2   0   2 136151. 5234.77   2
  -2   0   1 5612.75 256.835  11
  -2   0   0 121588. 4694.80   2
  -2   0   0 122202. 4690.06  11
  -2   0  -1 54276.4 2103.45   2
  -2   0  -1 53385.6 2095.54  11
  -2   0  -2 11553.1 495.971   2
  -2   0  -2 11534.0 485.384  11
  -2   0  -3 3427.38 181.224   2
  -2   0  -3 3113.33 167.165  11
  -2   0  -4 22114.2 898.873   2
  -2   0  -4 21671.6 880.381  11
  -2   0  -5 11625.6 511.884   2
  -2   0  -5 11668.9 490.629  11
  -2   0  -6 186.995 48.3763   2
   2   0   7 37874.0 1401.68  32
  -2   0  -7 40636.6 1460.25   2
  -2   0  -8 1386.25 114.028   2
  -2   0  -9 16958.9 723.536   2
   2   0  10 14629.2 998.115  37
   2   0  11 58846.0 2892.51  37
   2   0  11 62338.0 3135.14  34
   2   0  11 64808.6 3412.27  30
   2   0  11 58052.0 3197.83  26
   2   0  12 16983.6 1210.95  37
   2   0  12 20668.7 1458.48  17
   2   0  12 18075.5 1533.22  20
   2   0  12 17790.4 1409.33  21
   2   0  12 17648.9 1415.25  31
   2   0  12 17236.8 1542.78  30
   2   0  12 19168.0 1412.73  34
   2   0  12 18401.0 1405.10  22
   2   0  12 19315.9 1417.42  23
   2   0  12 16929.1 1421.82  26
   2   0  12 16181.7 1289.15  25
   2   0  13 52337.2 2657.48  37
   2   0  13 52916.3 3120.81  20
   2   0  13 49175.8 2890.15  21
   2   0  13 48358.4 2897.02  31
   2   0  13 47650.9 2859.09  28
   2   0  13 52059.0 2879.11  34
   2   0  13 52269.6 3134.58  30
   2   0  13 51427.1 2849.78  23
   2   0  13 54377.8 2995.45  26
   2   0  13 54088.0 2898.06  22
   2   0  13 46333.1 2728.51  25
   2   0  14 1026.72 290.511  37
   2   0  14 915.596 368.474  21
   2   0  14 597.039 357.499  20
   2   0  14 986.332 396.851  30
   2   0  14 730.932 321.385  31
   2   0  14 966.071 344.910  28
   2   0  14 1376.60 385.527  34
   2   0  14 690.421 285.237  25
   2   0  14 846.385 355.402  26
   2   0  14 1197.63 374.196  22
   2   0  14 815.550 341.062  23
   2   0  15 36288.5 2181.88  37
   2   0  15 38718.7 2484.29  21
   2   0  15 33110.9 2531.97  20
   2   0  15 40382.8 2499.42  31
   2   0  15 43868.8 2783.77  30
   2   0  15 36736.5 2426.70  34
   2   0  15 39146.5 2396.97  29
   2   0  15 38771.6 2468.11  28
   2   0  15 37658.5 2456.20  26
   2   0  15 42801.6 2508.14  22
   2   0  15 36081.2 2285.17  25
   2   0  16 20496.6 1489.39  37
   2   0  16 24072.1 1804.05  21
   2   0  16 19754.0 1835.41  20
   2   0  16 21182.0 1876.20  30
   2   0  16 22498.5 1681.53  29
   2   0  16 21657.9 1724.60  28
   2   0  16 21977.1 1729.95  34
   2   0  16 20790.2 1718.55  31
   2   0  16 23145.0 1790.84  26
   2   0  16 24737.3 1787.63  22
   2   0  16 22398.8 1615.76  25
   2   0  17 30678.7 1966.53  37
   2   0  17 32904.0 2236.55  21
   2   0  17 31358.9 2408.42  20
   2   0  17 35069.6 2187.77  29
   2   0  17 33502.6 2232.15  28
   2   0  17 31213.1 2195.71  34
   2   0  17 37556.6 2533.26  30
   2   0  17 32972.8 2219.77  31
   2   0  17 37694.1 2306.38  22
   2   0  17 34192.9 2272.23  26
   2   0  17 30735.3 2032.62  25
   2   0  18 16467.2 1275.48  37
   2   0  18 15698.4 1650.36  20
   2   0  18 18018.2 1504.99  26
   2   0  18 20220.5 1418.56  25
   2   0  18 16906.6 1445.84  28
   2   0  18 16602.6 1441.77  34
   2   0  18 18143.7 1433.81  29
   2   0  19 30696.1 1898.78  37
   2   0  19 32942.5 2148.86  26
   2   0  19 34438.1 1992.92  25
   2   0  19 34578.6 2080.54  29
   2   0  19 34359.4 2128.59  28
   2   0  20 521.790 209.726  37
   2   0  20 511.520 216.975  25
   2   0  20 267.251 215.873  26
   2   0  20 428.962 226.195  29
   2   0  21 11368.0 856.016  37
   2   0  21 11479.9 973.557  26
  -2  -1  23 1636.03 271.875  37
  -2  -1  23 1799.53 875.269  21
  -2  -1  23 1780.84 417.733  20
  -2  -1  23 1674.20 338.422  22
  -2  -1  22 666.317 200.894  37
  -2  -1  22 510.843 284.869  20
  -2  -1  22 529.320 256.308  22
  -2  -1  21 273.181 161.024  37
  -2  -1  21 165.378 238.550  20
  -2  -1  21 298.046 225.681  22
  -2  -1  20 7072.44 757.373  37
  -2  -1  20 5565.68 934.468  20
  -2  -1  20 7240.90 916.935  22
  -2  -1  19 1211.85 334.275  37
  -2  -1  19 1251.04 461.035  20
  -2  -1  19 1086.83 359.949  34
  -2  -1  19 939.743 399.725  22
  -2  -1  19 991.302 805.303  25
  -2  -1  18 47449.6 2091.32  35
  -2  -1  18 48031.8 2591.69  37
  -2  -1  18 47310.6 3061.71  20
  -2  -1  18 42752.9 2708.86  34
  -2  -1  18 39043.3 2646.19  31
  -2  -1  18 47000.5 2693.01  25
  -2  -1  18 43576.6 2792.38  22
  -2  -1  17 2571.83 486.498  37
  -2  -1  17 3281.79 337.176  35
  -2  -1  17 3433.22 705.911  21
  -2  -1  17 3874.70 770.790  20
  -2  -1  17 3304.89 596.457  34
  -2  -1  17 2023.30 521.399  31
  -2  -1  17 3644.06 763.660  25
  -2  -1  16 117550. 5225.19  37
  -2  -1  16 123484. 4686.08  35
  -2  -1  16 115949. 5792.08  20
  -2  -1  16 102702. 5521.24  21
  -2  -1  16 120637. 5745.69  14
  -2  -1  16 104133. 5644.18  19
  -2  -1  16 110860. 5406.20  34
  -2  -1  16 97998.8 5356.60  31
  -2  -1  16 107791. 5195.79  25
  -2  -1  15 11975.2 690.896  35
  -2  -1  15 9890.09 1229.22  19
  -2  -1  15 11048.6 1175.70  21
  -2  -1  15 13314.3 1323.83  14
  -2  -1  15 10839.1 1230.52  20
  -2  -1  15 9550.70 1071.45  31
  -2  -1  15 10268.1 1046.54  34
  -2  -1  15 9216.71 861.654  29
  -2  -1  15 10471.2 1050.08  26
  -2  -1  15 9300.50 949.040  25
  -2  -1  14 67854.1 2627.18  35
  -2  -1  14 59356.7 3609.44  19
  -2  -1  14 57821.2 3342.85  21
  -2  -1  14 62672.3 3475.13  20
  -2  -1  14 63607.9 3508.52  14
  -2  -1  14 57608.7 2934.82  29
  -2  -1  14 61463.3 3231.38  34
  -2  -1  14 50879.9 3201.00  31
  -2  -1  14 58790.5 3154.71  26
  -2  -1  14 58590.9 3059.48  25
  -2  -1  13 2567.38 555.610  14
  -2  -1  13 1972.42 352.651  36
  -2  -1  13 2550.56 250.193  35
  -2  -1  13 2288.95 518.661  20
  -2  -1  13 2446.62 509.394  21
  -2  -1  13 2573.66 448.092  26
  -2  -1  13 2018.17 388.915  25
  -2  -1  13 2128.27 470.438  31
  -2  -1  13 2356.11 442.055  34
  -2  -1  12 135587. 6557.55  34
  -2  -1  12 134667. 6389.19  36
  -2  -1  11 6068.57 571.357  36
  -2  -1  11 6716.83 408.309  35
  -2  -1  10 31493.0 1356.20  35
  -2  -1   9 7206.19 395.094  35
  -2  -1   8 5927.98 330.102  35
  -2  -1   7 109698. 4291.40  35
  -2  -1   6 145491. 5126.80   2
   2   1  -6 124468. 5096.91  38
  -2  -1   5 101497. 3567.04   2
   2   1  -5 85443.7 3537.72  38
  -2  -1   4 332.149 55.0160   2
  -2  -1   4 449.745 55.7617  11
   2   1  -4 429.187 50.4982  38
  -2  -1   3 13159.9 538.125   2
  -2  -1   3 12104.5 528.435  11
   2   1  -3 12020.3 517.355  38
   2   1  -2 2154.65 124.946  38
  -2  -1   1 16657.1 720.516   2
  -2  -1   1 18061.3 724.172  11
   2   1  -1 17670.2 713.668  38
  -2  -1   0 208652. 8113.83   2
  -2  -1   0 214096. 8112.86  11
  -2  -1  -1 10266.2 450.185   2
  -2  -1  -1 10007.5 447.303  11
   2   1   1 10462.0 439.872  38
  -2  -1  -2 84759.3 3310.39   2
   2   1   2 85524.9 3295.82  38
  -2  -1  -3 6510.46 299.919   2
   2   1   3 5956.72 281.416  38
  -2  -1  -4 61834.8 2267.80   2
   2   1   4 54889.5 2240.35  38
  -2  -1  -5 3198.03 185.858   2
  -2  -1  -6 17455.2 739.126   2
  -2  -1  -7 17736.2 750.215   2
  -2  -1  -8 18331.2 776.359   2
   2   1   9 10361.3 769.765  37
   2   1  10 7955.38 786.961  34
   2   1  10 7194.85 656.073  37
   2   1  11 2665.34 402.004  37
   2   1  11 3834.46 591.031  17
   2   1  11 3788.21 576.494  28
   2   1  11 3604.89 545.406  34
   2   1  11 3497.28 649.863  30
   2   1  11 3585.70 582.012  26
   2   1  11 2953.96 504.392  22
   2   1  11 2606.39 487.555  25
   2   1  12 260.352 148.345  37
   2   1  12 617.764 276.677  21
   2   1  12 247.652 244.396  20
   2   1  12 259.426 215.233  29
   2   1  12 283.800 290.567  30
   2   1  12 216.916 197.002  31
   2   1  12 167.685 190.380  34
   2   1  12 201.709 174.728  25
   2   1  12 574.861 290.151  26
   2   1  12 201.519 191.172  22
   2   1  13 4550.34 574.905  37
   2   1  13 3362.02 506.955  16
   2   1  13 5295.64 767.644  21
   2   1  13 4078.40 714.839  20
   2   1  13 5685.87 778.295  31
   2   1  13 5964.93 879.175  30
   2   1  13 5250.70 728.493  34
   2   1  13 5178.80 684.642  29
   2   1  13 5322.89 722.501  22
   2   1  13 4938.15 729.510  26
   2   1  13 4293.35 662.173  25
   2   1  14 101.661 122.819  37
   2   1  14 289.358 181.411  16
   2   1  14 100.946 248.946  21
   2   1  14 57.0715 234.228  20
   2   1  14 319.972 247.606  30
   2   1  14 47.4098 224.686  31
   2   1  14 340.111 260.077  29
   2   1  14 145.985 176.200  34
   2   1  14 579.762 279.543  25
   2   1  14 457.502 242.394  22
   2   1  15 24927.5 1630.49  37
   2   1  15 19519.7 1482.27  16
   2   1  15 27231.4 1962.67  21
   2   1  15 23646.5 1947.80  20
   2   1  15 24322.2 1834.70  34
   2   1  15 30472.6 2211.31  30
   2   1  15 27430.5 1830.01  29
   2   1  15 27915.2 1915.76  22
   2   1  15 26459.1 1827.25  25
   2   1  16 8287.22 837.977  37
   2   1  16 8991.91 1050.79  21
   2   1  16 7164.79 1017.15  20
   2   1  16 8874.79 1019.27  28
   2   1  16 7730.66 911.929  25
   2   1  17 240.282 193.993  37
   2   1  17 339.535 273.791  21
   2   1  17 113.757 498.171  20
   2   1  17 758.940 331.460  25
   2   1  17 397.102 263.215  28
   2   1  18 8299.99 816.588  37
   2   1  18 10018.9 970.066  25
   2   1  18 10707.4 1064.33  28
   2   1  19 7714.05 738.603  37
   2   1  19 9355.96 867.853  25
   2   1  20 15433.9 1080.55  37
   2   1  20 19422.7 1226.48  25
   2   1  21 31083.0 1759.09  26
   2   1  21 29488.0 1596.58  25
  -2  -2  24 2020.86 314.055  22
  -2  -2  23 1228.91 383.910  20
  -2  -2  22 2688.51 575.117  20
  -2  -2  21 6301.03 645.737  37
  -2  -2  21 5163.26 864.895  20
  -2  -2  20 12158.5 995.155  37
  -2  -2  20 11459.0 1327.03  20
  -2  -2  20 11431.2 1115.70  34
  -2  -2  20 11331.5 1151.37  22
  -2  -2  19 14020.9 1110.99  37
  -2  -2  19 11505.0 1378.71  20
  -2  -2  19 11765.4 1237.94  31
  -2  -2  19 12847.8 1212.41  34
  -2  -2  19 11879.2 1226.27  22
  -2  -2  18 30563.5 1877.09  37
  -2  -2  18 31840.9 1492.85  35
  -2  -2  18 30290.1 2345.31  20
  -2  -2  18 27371.5 2252.98  19
  -2  -2  18 26637.0 2095.78  31
  -2  -2  18 30892.5 2081.53  34
  -2  -2  18 27505.8 2068.65  22
  -2  -2  17 6135.78 485.474  35
  -2  -2  17 5881.84 697.460  37
  -2  -2  17 5966.60 916.679  21
  -2  -2  17 5967.31 965.706  20
  -2  -2  17 5788.15 970.841  19
  -2  -2  17 4566.41 805.227  31
  -2  -2  17 6256.34 820.185  34
  -2  -2  17 5601.45 846.842  22
  -2  -2  17 5212.25 702.227  23
  -2  -2  16 7622.64 779.419  37
  -2  -2  16 7294.10 523.901  35
  -2  -2  16 6886.04 962.913  21
  -2  -2  16 5849.83 969.715  20
  -2  -2  16 7630.43 1125.23  19
  -2  -2  16 6771.33 936.898  31
  -2  -2  16 7482.98 891.290  34
  -2  -2  16 5823.91 835.607  22
  -2  -2  16 7514.85 990.409  25
  -2  -2  16 6734.58 797.037  23
  -2  -2  15 38138.2 2118.70  37
  -2  -2  15 38804.6 2334.11  34
  -2  -2  15 42583.7 1751.65  35
  -2  -2  15 37308.4 2745.20  19
  -2  -2  15 36335.1 2456.55  21
  -2  -2  15 36111.8 2513.02  20
  -2  -2  15 30432.9 2323.19  31
  -2  -2  15 33441.8 2166.78  23
  -2  -2  15 33367.1 2300.26  22
  -2  -2  15 36225.1 2203.88  25
  -2  -2  14 27510.6 1644.83  37
  -2  -2  14 29266.9 1305.61  35
  -2  -2  14 30246.0 2337.89  19
  -2  -2  14 26350.4 1928.29  21
  -2  -2  14 29762.7 2069.63  20
  -2  -2  14 22798.3 1857.51  31
  -2  -2  14 25967.9 1846.30  22
  -2  -2  14 25806.8 1710.79  25
  -2  -2  14 23488.0 1698.40  23
  -2  -2  13 25858.6 1180.34  35
  -2  -2  13 23408.3 1759.00  21
  -2  -2  13 26986.7 1863.80  20
  -2  -2  13 27681.2 1942.57  14
  -2  -2  13 21219.0 1722.92  31
  -2  -2  13 24431.1 1705.72  22
  -2  -2  13 22781.3 1540.78  25
  -2  -2  12 710.187 126.928  35
  -2  -2  12 1046.49 324.923  21
  -2  -2  12 550.095 242.022  22
  -2  -2  11 2906.56 245.639  35
  -2  -2  10 28914.7 1232.90  35
  -2  -2  10 27646.2 1190.11  18
   2   2  -9 35915.0 1474.10  38
  -2  -2   9 40126.5 1566.96  35
   2   2  -8 47939.8 1956.98  38
  -2  -2   8 53452.8 2031.05  35
   2   2  -7 2606.42 158.250  38
   2   2  -6 201241. 7736.13  38
   2   2  -5 9872.46 439.704  38
  -2  -2   5 9755.36 469.043   2
   2   2  -4 70180.7 2752.72  38
  -2  -2   4 70890.9 2783.28   2
   2   2  -3 805.890 76.9377  38
   2   2  -2 65965.6 2555.92  38
  -2  -2   2 64543.9 2576.64   2
   2   2  -1 3861.03 205.061  38
  -2  -2   1 3960.23 221.928   2
  -2  -2   0 30274.7 1238.93   2
   2   2   1 25216.4 1005.12  38
  -2  -2  -1 23803.5 1019.43   2
   2   2   2 9150.83 407.650  38
  -2  -2  -2 8833.28 422.668   2
   2   2   3 56518.1 2198.13  38
  -2  -2  -3 55113.2 2217.23   2
   2   2   4 26491.0 1078.80  38
  -2  -2  -4 26740.2 1103.35   2
   2   2   5 192227. 7592.02  38
  -2  -2  -5 205774. 7624.49   2
   2   2   6 160302. 6543.20  38
  -2  -2  -6 188554. 6592.76   2
  -2  -2  -7 128256. 4964.94   2
  -2  -2  -7 126921. 5001.19  18
   2   2   8 17919.2 805.933  15
   2   2   9 59451.1 3073.63  34
   2   2   9 61697.7 2450.10  15
   2   2  10 55607.2 2714.72  37
   2   2  10 52381.7 2949.52  34
   2   2  10 57910.3 3042.60  28
   2   2  10 56662.7 2944.62  29
   2   2  10 58207.0 3091.01  26
   2   2  11 1539.70 309.584  37
   2   2  11 1865.42 441.513  20
   2   2  11 1672.28 497.385  30
   2   2  11 2088.34 422.012  29
   2   2  11 1804.01 415.642  28
   2   2  11 1988.82 418.952  25
   2   2  11 1754.59 406.717  22
   2   2  11 2428.13 491.719  26
   2   2  12 43792.1 2305.98  37
   2   2  12 41540.3 2629.33  20
   2   2  12 49047.1 2680.63  28
   2   2  12 45337.6 2556.25  29
   2   2  12 49423.3 2656.17  22
   2   2  12 44402.5 2667.95  26
   2   2  12 36778.2 2444.06  25
   2   2  13 811.575 250.218  37
   2   2  13 459.545 289.030  21
   2   2  13 799.879 328.852  20
   2   2  13 842.852 306.016  29
   2   2  13 810.272 320.327  28
   2   2  13 478.720 253.795  25
   2   2  13 647.051 305.464  26
   2   2  14 2229.80 400.525  37
   2   2  14 1182.32 350.754  16
   2   2  14 2944.20 610.363  21
   2   2  14 1863.31 496.023  20
   2   2  14 2151.20 467.151  29
   2   2  14 1719.09 466.491  28
   2   2  14 3013.42 550.477  25
   2   2  14 1898.53 506.628  26
   2   2  15 1195.03 311.087  37
   2   2  15 1033.58 318.985  16
   2   2  15 985.635 433.778  20
   2   2  15 1516.61 454.467  21
   2   2  15 1022.83 357.379  29
   2   2  15 1549.81 454.511  26
   2   2  16 582.700 230.898  37
   2   2  16 897.520 354.849  21
   2   2  16 251.802 258.450  26
   2   2  16 565.528 303.982  29
   2   2  17 2230.14 397.777  37
   2   2  17 3304.27 596.879  26
   2   2  17 3067.79 537.491  29
   2   2  18 4879.47 557.078  37
   2   2  18 5212.24 723.850  26
   2   2  18 6079.11 720.702  29
   2   2  19 311.192 149.381  37
   2   2  19 324.776 215.413  26
   2   2  20 4886.57 472.014  37
   2   2  20 6216.40 664.650  26
   2   2  21 670.682 207.791  25
  -2  -3  23 2034.28 383.809  22
  -2  -3  23 2041.63 545.028  20
  -2  -3  22 8436.94 856.252  22
  -2  -3  22 6139.45 837.739  20
  -2  -3  21 1268.49 455.185  20
  -2  -3  21 2228.69 479.183  22
  -2  -3  21 1369.92 348.424  34
  -2  -3  20 2308.56 599.911  20
  -2  -3  20 1906.46 500.845  31
  -2  -3  20 1725.61 422.323  34
  -2  -3  20 2601.29 548.302  22
  -2  -3  19 19392.0 1328.15  37
  -2  -3  19 17843.1 1731.58  20
  -2  -3  19 20067.1 1725.12  31
  -2  -3  19 19948.2 1539.08  34
  -2  -3  19 20793.3 1652.69  22
  -2  -3  18 2581.92 304.635  35
  -2  -3  18 1965.00 383.127  37
  -2  -3  18 2029.41 622.373  19
  -2  -3  18 1747.57 544.885  20
  -2  -3  18 2916.99 630.886  31
  -2  -3  18 2020.57 470.923  34
  -2  -3  18 2118.48 467.024  23
  -2  -3  18 1971.71 498.709  22
  -2  -3  17 26933.8 1685.82  37
  -2  -3  17 30366.8 1401.86  35
  -2  -3  17 23484.3 2054.83  20
  -2  -3  17 25438.4 2299.02  19
  -2  -3  17 26505.9 2117.11  31
  -2  -3  17 26680.5 1905.68  34
  -2  -3  17 26082.9 1957.52  22
  -2  -3  17 26647.0 1857.41  23
  -2  -3  16 17601.1 920.805  35
  -2  -3  16 15184.7 1328.76  34
  -2  -3  16 15917.6 1178.59  37
  -2  -3  16 15019.1 1579.96  21
  -2  -3  16 16920.8 1604.96  20
  -2  -3  16 16041.9 1754.50  19
  -2  -3  16 15714.2 1537.01  31
  -2  -3  16 15183.7 1408.09  22
  -2  -3  16 14628.2 1314.06  23
  -2  -3  15 33473.8 1887.94  37
  -2  -3  15 37656.8 1576.86  35
  -2  -3  15 33007.3 2347.05  20
  -2  -3  15 31315.8 2279.94  21
  -2  -3  15 32158.7 2622.43  19
  -2  -3  15 27709.7 2217.40  31
  -2  -3  15 29570.1 2117.60  22
  -2  -3  15 27062.8 1992.11  23
  -2  -3  14 4913.72 380.431  35
  -2  -3  14 4580.09 547.021  37
  -2  -3  14 5310.98 809.792  20
  -2  -3  14 4735.33 911.136  19
  -2  -3  14 4605.28 778.779  21
  -2  -3  14 3892.85 718.290  31
  -2  -3  14 4618.25 707.156  22
  -2  -3  14 3503.15 598.881  23
  -2  -3  13 33014.2 1373.76  35
  -2  -3  13 27951.5 1628.88  37
  -2  -3  13 31879.9 2471.99  19
  -2  -3  13 30110.8 2050.27  20
  -2  -3  13 27937.1 2019.31  21
  -2  -3  13 27665.1 2066.85  31
  -2  -3  13 26616.7 1873.60  22
  -2  -3  13 23394.9 1785.05  23
  -2  -3  12 9816.50 544.395  35
  -2  -3  12 8772.88 720.560  37
  -2  -3  12 9584.80 1245.39  19
  -2  -3  12 8993.50 990.277  21
  -2  -3  12 7830.91 968.122  31
  -2  -3  12 8908.10 915.044  22
  -2  -3  11 54970.4 2149.26  35
  -2  -3  11 48221.2 2084.36  18
   2   3 -10 240.430 52.0946  38
  -2  -3  10 323.228 93.0165  35
  -2  -3  10 105.540 71.1694  18
   2   3  -9 100310. 3896.60  38
  -2  -3   9 99117.5 3963.37  35
   2   3  -8 5663.63 299.161  38
   2   3  -7 2366.83 164.878  38
   2   3  -6 3442.13 208.849  38
   2   3  -5 266.795 60.9965  38
   2   3  -4 15104.9 660.622  38
   2   3  -3 25946.4 1032.54  38
  -2  -3   3 23227.2 1058.75   2
   2   3  -2 4114.17 223.670  38
  -2  -3   2 3661.78 245.413   2
  -2  -3   1 2376.20 182.992   2
  -2  -3   0 345.543 76.9494   2
   2   3   1 15646.3 658.413  38
  -2  -3  -1 14102.7 678.934   2
   2   3   2 58608.8 2271.14  38
  -2  -3  -2 55463.5 2298.87   2
   2   3   3 119252. 4564.94  38
  -2  -3  -3 115057. 4596.52   2
   2   3   4 66863.6 2659.60  38
  -2  -3  -4 68416.3 2696.82   2
   2   3   5 169704. 6661.77  38
  -2  -3  -5 177056. 6708.07   2
   2   3   6 27774.5 1194.24  38
  -2  -3  -6 31420.7 1318.41  18
  -2  -3  -6 30712.6 1248.36   2
   2   3   7 84360.7 3330.63  38
   2   3   7 88290.7 3459.22  15
   2   3   8 5625.39 360.127  15
   2   3   8 5447.06 684.688  28
   2   3   9 131678. 5399.51  15
   2   3   9 162211. 6374.63  26
   2   3   9 140841. 6197.69  28
   2   3   9 152329. 6136.72  29
   2   3  10 5041.63 534.018  37
   2   3  10 5263.20 723.039  26
   2   3  10 4565.37 621.797  29
   2   3  10 5016.74 703.725  28
   2   3  11 54149.4 2718.38  37
   2   3  11 60727.1 3216.01  26
   2   3  11 49874.0 3019.29  25
   2   3  11 61545.9 3061.10  29
   2   3  11 56894.9 3128.91  28
   2   3  12 3190.95 454.183  37
   2   3  12 4614.64 717.689  26
   2   3  12 3131.76 584.945  25
   2   3  12 3288.44 549.235  29
   2   3  12 3249.91 598.516  28
   2   3  13 39297.2 2231.43  37
   2   3  13 46045.6 2581.78  29
   2   3  13 48562.5 2735.22  26
   2   3  13 40659.3 2535.51  25
   2   3  14 482.924 207.015  37
   2   3  14 240.314 212.752  16
   2   3  14 371.624 281.632  21
   2   3  14 439.091 269.013  29
   2   3  14 488.264 271.933  25
   2   3  14 860.384 359.968  26
   2   3  15 38223.6 2185.75  37
   2   3  15 37135.3 2320.26  16
   2   3  15 45618.1 2712.28  21
   2   3  15 47016.4 2700.40  26
   2   3  15 46634.9 2561.81  25
   2   3  15 43912.2 2522.75  29
   2   3  16 1145.53 269.322  37
   2   3  16 1056.13 323.397  25
   2   3  16 839.525 345.754  26
   2   3  16 1093.15 334.560  29
   2   3  17 6157.81 605.608  37
   2   3  17 8203.05 886.193  26
   2   3  17 6162.07 732.698  25
   2   3  17 6918.65 779.098  29
   2   3  18 6979.55 598.215  37
   2   3  18 7197.46 794.405  26
   2   3  18 7826.35 746.236  25
   2   3  19 2674.62 318.636  37
   2   3  19 3708.75 528.293  26
   2   3  19 3558.14 445.048  25
   2   3  20 378.110 142.895  25
  -2  -4  23 172.257 164.970  22
  -2  -4  22 4335.49 570.558  22
  -2  -4  22 3652.10 470.122  34
  -2  -4  21 139.205 237.415  20
  -2  -4  21 38.2241 173.369  22
  -2  -4  21-88.4216 263.517  31
  -2  -4  21 231.796 175.384  34
  -2  -4  20 17433.0 1552.56  20
  -2  -4  20 19896.3 1513.05  22
  -2  -4  20 19131.6 1601.16  31
  -2  -4  20 15924.4 1311.15  34
  -2  -4  19 1154.62 435.429  20
  -2  -4  19 1579.18 446.776  22
  -2  -4  19 1810.71 409.618  23
  -2  -4  19 1132.89 348.080  34
  -2  -4  19 1166.84 439.973  31
  -2  -4  18 9242.67 1166.06  20
  -2  -4  18 13222.0 1569.70  19
  -2  -4  18 10070.8 1215.28  31
  -2  -4  18 10361.8 1036.52  34
  -2  -4  18 9583.10 1021.02  23
  -2  -4  18 9672.94 1081.69  22
  -2  -4  17 11494.2 1083.53  34
  -2  -4  17 8927.62 796.933  37
  -2  -4  17 9957.35 1199.42  20
  -2  -4  17 9047.75 1353.42  19
  -2  -4  17 9849.38 1218.24  31
  -2  -4  17 9844.87 1055.91  23
  -2  -4  17 9908.34 1092.73  22
  -2  -4  16 33002.3 1864.50  37
  -2  -4  16 33590.7 2651.53  21
  -2  -4  16 39524.6 2949.31  19
  -2  -4  16 34467.2 2417.93  20
  -2  -4  16 32202.8 2468.81  31
  -2  -4  16 33158.6 2242.65  23
  -2  -4  16 36329.8 2315.50  22
  -2  -4  15 77.3419 105.937  37
  -2  -4  15 381.638 252.707  23
  -2  -4  15 95.9034 185.555  22
  -2  -4  15 698.332 446.638  19
  -2  -4  15 333.929 252.470  20
  -2  -4  14 29563.9 1937.08  22
  -2  -4  14 27415.1 1998.17  20
  -2  -4  14 28906.9 2255.54  21
  -2  -4  14 31902.8 2557.13  19
  -2  -4  13 4476.11 702.506  20
  -2  -4  13 3987.01 939.158  21
  -2  -4  13 4795.60 942.941  19
  -2  -4  13 4365.99 645.447  22
  -2  -4  13 3282.38 643.636  31
  -2  -4  12 69187.5 3826.59  21
  -2  -4  12 66251.9 3767.48  31
  -2  -4  12 78804.7 3689.06  22
  -2  -4  11 2023.13 346.429  33
   2   4 -11 2020.23 156.491  38
  -2  -4  11 1860.22 515.216  21
  -2  -4  11 2079.28 213.506  18
   2   4 -10 113675. 4189.20  38
  -2  -4  10 103231. 4291.44  18
   2   4  -9 859.732 103.181  38
  -2  -4   9 593.891 132.959  18
   2   4  -8 80730.1 3158.82  38
  -2  -4   8 77689.7 3285.35  18
   2   4  -7 25102.3 1070.50  38
   2   4  -6 47825.2 1936.39  38
   2   4  -5 214.263 67.6334  38
   2   4  -4 4815.11 280.391  38
   2   4  -3 7593.53 389.828  38
   2   4  -2 70798.2 2807.23  38
  -2  -4   1 12964.1 643.224   2
   2   4   0 23056.8 954.525  38
  -2  -4   0 20736.6 989.150   2
   2   4   1 2791.55 190.866  38
  -2  -4  -1 2383.85 206.749   2
   2   4   2 56662.8 2181.43  38
  -2  -4  -2 50952.0 2217.11   2
   2   4   3 26048.1 1068.14  38
  -2  -4  -3 25400.7 1203.71  18
  -2  -4  -3 23578.3 1104.36   2
   2   4   4 18535.2 818.273  38
  -2  -4  -4 18922.2 947.125  18
   2   4   5 17937.1 795.698  38
  -2  -4  -5 18514.1 924.152  18
   2   4   6 60198.7 2455.68  38
  -2  -4  -6 65555.6 2602.53  18
   2   4   7 4529.87 260.535  38
   2   4   7 4540.72 357.576  15
   2   4   7 5661.61 672.774  26
   2   4   7 5140.07 589.719  29
   2   4   8 63796.8 2765.58  15
   2   4   8 70266.7 3332.98  29
   2   4   9 23014.8 1107.26  15
   2   4   9 28600.0 1808.56  26
   2   4   9 27374.5 1689.28  29
   2   4  10 109501. 4956.12  26
   2   4  10 107678. 4825.11  29
   2   4  11 45974.5 2638.63  26
   2   4  11 40302.5 2530.59  25
   2   4  11 42995.3 2499.34  29
   2   4  12 54264.6 2808.84  37
   2   4  12 67553.1 3394.87  26
   2   4  12 58115.2 3230.52  25
   2   4  12 63796.5 3235.69  29
   2   4  13 4540.76 533.135  37
   2   4  13 6596.05 789.076  29
   2   4  13 5351.14 769.154  26
   2   4  13 5903.77 783.866  25
   2   4  14 30488.2 1748.08  37
   2   4  14 28114.0 1971.83  16
   2   4  14 33084.0 2238.35  21
   2   4  14 35828.6 2118.15  29
   2   4  14 36047.5 2148.89  25
   2   4  14 36936.9 2238.20  26
   2   4  15 8082.07 689.663  37
   2   4  15 10254.7 1019.54  26
   2   4  15 9203.96 925.978  25
   2   4  15 8198.65 863.021  16
   2   4  15 8242.14 978.041  21
   2   4  16 16697.1 1307.20  26
   2   4  16 15338.4 1208.35  25
   2   4  17 1557.71 320.937  25
   2   4  17 1389.58 352.038  26
   2   4  18 12628.6 995.223  26
   2   4  18 13229.4 918.751  25
   2   4  19 1183.95 222.880  25
  -2  -5  23 19292.0 1137.64  22
  -2  -5  22 1902.59 348.642  22
  -2  -5  22 1939.90 405.570  31
  -2  -5  22 1232.38 246.054  34
  -2  -5  21 13151.3 1051.38  22
  -2  -5  21 13188.7 1187.43  31
  -2  -5  21 9873.13 868.517  34
  -2  -5  20 1022.71 506.080  20
  -2  -5  20 1331.84 373.583  22
  -2  -5  20 1173.99 396.699  31
  -2  -5  20 793.074 262.424  34
  -2  -5  19 6396.60 866.887  20
  -2  -5  19 7251.50 843.844  23
  -2  -5  19 7125.59 848.374  22
  -2  -5  19 5997.62 733.946  34
  -2  -5  18 338.058 346.741  19
  -2  -5  18 51.5507 199.473  20
  -2  -5  18 160.415 164.633  34
  -2  -5  18 500.395 278.246  22
  -2  -5  18 90.5363 205.391  23
  -2  -5  17 5101.98 435.450  35
  -2  -5  17 5305.59 1030.28  19
  -2  -5  17 4028.25 722.406  20
  -2  -5  17 4821.99 749.140  23
  -2  -5  17 4373.70 698.753  22
  -2  -5  16 1352.74 225.156  35
  -2  -5  16 463.102 422.296  19
  -2  -5  16 1421.21 445.818  20
  -2  -5  16 1057.05 435.718  31
  -2  -5  16 968.943 384.420  23
  -2  -5  16 1126.27 376.693  22
  -2  -5  15 8475.54 559.764  35
  -2  -5  15 7247.10 1253.29  19
  -2  -5  15 6626.28 923.302  23
  -2  -5  15 7125.70 886.162  22
  -2  -5  15 6806.12 1008.16  31
  -2  -5  14 124.125 96.1077  35
  -2  -5  14 132.160 190.533  22
  -2  -5  14 60.4416 218.700  31
  -2  -5  13 33989.6 1501.84  35
  -2  -5  13 26790.9 2157.06  31
  -2  -5  13 29283.5 1984.55  22
  -2  -5  12 12055.5 643.171  35
  -2  -5  12 9479.31 602.903  18
  -2  -5  12 11069.0 1416.95  19
  -2  -5  12 9282.12 839.322  33
  -2  -5  12 7467.43 1016.38  31
  -2  -5  12 9268.54 952.274  22
   2   5 -11 42733.8 1713.47  38
  -2  -5  11 44913.2 1835.69  35
  -2  -5  11 38440.8 1831.65  18
  -2  -5  11 43271.0 2994.59  19
  -2  -5  11 35442.4 2099.00  33
  -2  -5  11 37404.8 2270.65  22
  -2  -5  10 5875.76 598.831  33
  -2  -5  10 6636.03 431.847  35
   2   5 -10 6851.18 376.819  38
  -2  -5  10 6122.42 462.246  18
  -2  -5  10 5920.97 992.122  19
   2   5  -9 113426. 4149.22  38
  -2  -5   9 102282. 5439.30  19
  -2  -5   9 100486. 4282.75  18
   2   5  -8 26331.9 1113.72  38
  -2  -5   8 23655.8 1235.68  18
   2   5  -7 192133. 7224.06  38
  -2  -5   7 172845. 7370.78  18
   2   5  -6 985.189 121.387  38
  -2  -5   6 732.264 174.649  18
   2   5  -5 61162.9 2420.01  38
  -2  -5   5 56696.5 2578.19  18
   2   5  -4 12936.8 624.460  38
   2   5  -3 767.417 112.856  38
  -2  -5   3 561.485 165.823  18
   2   5  -2 4386.20 278.910  38
  -2  -5   2 4361.27 383.714  18
  -2  -5   1 58875.7 2549.90  18
   2   5   0 6972.28 375.699  38
  -2  -5   0 5597.17 461.358  18
   2   5   1 13200.4 622.412  38
  -2  -5  -1 12029.5 744.339  18
   2   5   2 16462.7 743.856  38
  -2  -5  -2 14820.2 866.538  18
   2   5   3 12089.0 587.500  38
  -2  -5  -3 11952.7 724.388  18
   2   5   4 401.543 81.7419  38
  -2  -5  -4 319.677 134.029  18
   2   5   5 22078.6 969.432  38
  -2  -5  -5 22645.5 1125.33  18
   2   5   5 20025.2 1100.76  15
   2   5   5 21611.9 1500.66  10
   2   5   6 18618.6 849.133  38
   2   5   6 18894.5 999.851  15
   2   5   6 19996.8 1402.85  10
   2   5   7 2506.85 428.101  29
   2   5   7 2249.76 430.266  10
   2   5   7 2373.93 259.085  15
   2   5   8 31897.6 1508.14  15
   2   5   8 33739.6 1989.83  29
   2   5   9 384.626 261.378  25
   2   5   9 40.6866 184.581  26
   2   5   9 110.581 151.286  29
   2   5  10 15320.8 1257.51  26
   2   5  10 12334.5 1195.18  25
   2   5  10 14507.0 1189.64  29
   2   5  11 13561.8 1206.77  26
   2   5  11 12376.2 1170.77  25
   2   5  12 36507.0 2240.66  26
   2   5  12 35532.8 2211.16  25
   2   5  13 15133.5 1269.14  26
   2   5  13 17710.1 1328.77  25
   2   5  13 13527.3 1245.22  16
   2   5  14 34683.8 2098.89  26
   2   5  14 38072.5 2113.03  25
   2   5  14 34005.1 2197.31  21
   2   5  14 33243.6 2073.76  16
   2   5  15 9077.41 872.945  26
   2   5  15 10397.0 891.572  25
   2   5  15 8894.23 856.432  16
   2   5  16 25807.1 1553.04  26
   2   5  16 25068.3 1485.15  25
   2   5  17 4136.02 437.958  25
  -2  -6  22 8363.25 635.536  22
  -2  -6  22 10631.6 898.827  31
  -2  -6  21 5423.48 558.673  22
  -2  -6  21 4236.57 456.377  34
  -2  -6  20 6115.49 649.862  22
  -2  -6  20 4636.93 542.789  34
  -2  -6  19 1958.43 433.953  23
  -2  -6  19 1945.17 396.371  22
  -2  -6  19 2045.82 514.082  31
  -2  -6  19 1079.37 289.163  34
  -2  -6  18 6322.50 712.119  34
  -2  -6  18 6499.07 767.716  22
  -2  -6  18 6478.42 848.356  23
  -2  -6  18 6718.93 970.975  31
  -2  -6  17 1971.04 695.218  19
  -2  -6  17 1661.19 470.948  23
  -2  -6  17 1307.45 363.635  22
  -2  -6  17 1306.44 455.506  31
  -2  -6  16 2775.70 308.586  35
  -2  -6  16 2533.89 503.503  22
  -2  -6  16 2037.45 519.782  23
  -2  -6  16 2881.21 646.099  31
  -2  -6  15 542.175 143.644  35
  -2  -6  15 436.087 319.294  31
  -2  -6  15 756.492 347.073  23
  -2  -6  15 325.591 223.412  22
  -2  -6  14 29087.6 1346.79  35
  -2  -6  14 24743.7 2386.69  19
  -2  -6  14 24466.1 2061.82  31
  -2  -6  14 24371.2 1755.19  22
  -2  -6  13 60.8781 263.288  31
  -2  -6  13 143.759 89.8842  35
  -2  -6  13 353.617 341.940  19
  -2  -6  12 13916.8 1431.16  31
  -2  -6  12 12218.3 1018.14  33
  -2  -6  12 17654.6 849.611  35
  -2  -6  12 13189.7 830.172  18
  -2  -6  12 14240.6 1680.94  19
  -2  -6  11 7188.37 989.457  31
  -2  -6  11 7582.45 738.187  33
   2   6 -11 9247.05 487.762  38
   2   6 -11 8412.42 690.217  40
  -2  -6  11 9674.14 573.376  35
  -2  -6  11 8257.64 601.974  18
  -2  -6  11 9235.54 1314.07  19
  -2  -6  10 63889.4 3426.85  33
   2   6 -10 78792.0 3078.24  38
  -2  -6  10 82824.1 3180.87  35
  -2  -6  10 71331.4 3249.61  18
  -2  -6  10 71485.0 4448.40  19
  -2  -6   9 48238.1 2265.88  18
  -2  -6   9 47890.5 3319.06  19
  -2  -6   9 43529.7 2410.94  33
  -2  -6   9 44464.1 2766.99   3
   2   6  -8 10596.1 536.291  38
  -2  -6   8 9194.43 654.839  18
  -2  -6   8 9996.94 1285.64  19
  -2  -6   8 7994.64 1032.25   5
  -2  -6   8 8818.13 977.954   3
   2   6  -7 28762.2 1230.03  38
  -2  -6   7 26374.2 1392.95  18
  -2  -6   7 26381.4 2176.92  19
  -2  -6   7 30240.8 1765.54   8
  -2  -6   7 22862.8 1919.19   5
  -2  -6   7 27924.3 1913.40   3
   2   6  -6 12648.5 623.070  38
  -2  -6   6 11830.6 766.501  18
  -2  -6   6 9651.49 1231.27  19
  -2  -6   6 13617.9 1205.99   3
  -2  -6   6 9985.54 1178.34   5
   2   6  -5 49471.4 2023.52  38
  -2  -6   5 51788.6 2856.90   3
   2   6  -4 32729.8 1435.14  38
  -2  -6   4 38229.7 2265.93   3
   2   6  -3 61127.8 2420.11  38
  -2  -6   3 58846.9 2604.59  18
  -2  -6   2 27256.0 1382.61  18
  -2  -6   2 24279.6 1935.39   5
   2   6  -1 100035. 3798.41  38
  -2  -6   1 89731.4 3971.15  18
  -2  -6   1 103037. 4720.74   3
   2   6   0 42920.7 1697.84  38
  -2  -6   0 36689.8 1850.04  18
  -2  -6   0 43424.7 2511.04   3
   2   6   1 64973.7 2464.00  38
  -2  -6  -1 63144.0 3326.55   3
   2   6   2 29040.2 1230.52  38
  -2  -6  -2 26545.1 1391.96  18
  -2  -6  -2 30836.5 2021.99   3
   2   6   3 7896.60 441.880  38
  -2  -6  -3 6930.60 559.561  18
   2   6   3 8106.55 900.876  10
  -2  -6  -3 9028.41 1001.96   3
   2   6   4 17915.4 835.279  38
  -2  -6  -4 17265.4 1003.06  18
   2   6   4 17710.5 999.665  15
   2   6   4 17344.7 1408.74  10
   2   6   5 15393.4 744.941  38
   2   6   5 14228.9 966.816  40
  -2  -6  -5 16769.0 933.621  18
   2   6   5 16062.1 907.525  15
   2   6   5 16338.0 1339.80  10
  -2  -6  -5 18192.5 1480.78   3
   2   6   6 5557.02 335.250  38
   2   6   6 5455.93 505.177  40
   2   6   6 6003.50 747.418  10
   2   6   6 5493.89 447.506  15
   2   6   7 3646.49 567.203  10
   2   6   7 3163.12 544.450  25
   2   6   7 2973.12 310.248  15
   2   6   8 559.647 279.715  25
   2   6   8 637.844 142.247  15
   2   6   9 19356.4 1475.73  25
  -2  -6 -10 3160.30 553.915   8
   2   6  10 3325.25 555.645  25
   2   6  11 21272.1 1508.38  25
   2   6  12 99.2392 163.089  25
   2   6  12 126.356 155.740  26
   2   6  12-81.1888 235.498  16
   2   6  13 19753.5 1325.78  26
   2   6  13 22183.2 1401.47  25
   2   6  13 21306.2 1488.62  16
   2   6  14 216.212 157.841  25
   2   6  14 332.979 211.280  16
   2   6  15 26255.1 1380.17  25
   2   6  15 23973.0 1437.76  16
   2   6  16 717.460 156.131  25
  -2  -7  21 395.134 201.092  31
  -2  -7  20 15910.1 1132.12  23
  -2  -7  20 17132.2 1312.67  31
  -2  -7  19 2034.87 419.543  23
  -2  -7  19 2085.56 496.595  31
  -2  -7  18 8421.19 763.155  34
  -2  -7  18 10371.3 1106.80  31
  -2  -7  18 10011.4 994.792  23
  -2  -7  17 14774.4 1413.35  31
  -2  -7  17 14013.0 1290.53  23
  -2  -7  16 1242.32 438.044  31
  -2  -7  16 653.385 338.311  23
  -2  -7  15 31917.5 2284.26  31
  -2  -7  15 28893.4 2133.10  23
  -2  -7  14 5476.10 884.296  31
  -2  -7  14 5683.33 445.228  35
  -2  -7  14 5923.54 1125.43  19
  -2  -7  13 19088.5 1742.08  31
  -2  -7  13 21512.4 1086.11  35
  -2  -7  13 22578.7 2217.99  19
  -2  -7  12 2635.12 610.805  31
  -2  -7  12 2307.11 381.677  33
   2   7 -12 2709.56 371.034  40
  -2  -7  12 2492.62 269.165  35
  -2  -7  12 1778.23 660.505  19
  -2  -7  12 1872.71 283.296  18
  -2  -7  11 37939.6 2155.66  33
  -2  -7  11 34875.7 2573.02  31
   2   7 -11 42635.1 1788.62  38
   2   7 -11 40791.2 2107.25  40
  -2  -7  11 38648.9 1974.94  18
  -2  -7  11 38918.9 3081.50  19
  -2  -7  10 15332.3 781.490  35
   2   7 -10 12996.7 681.059  38
  -2  -7  10 11709.7 833.738  18
  -2  -7  10 13970.6 1665.41  19
  -2  -7  10 12197.9 1282.98  31
   2   7 -10 13488.9 1128.61  10
   2   7  -9 18637.7 866.669  38
  -2  -7   9 16198.1 1031.67  18
  -2  -7   9 16767.1 1819.80  19
  -2  -7   9 15793.8 1477.52  31
   2   7  -9 18588.0 1387.98  10
   2   7  -8 27040.8 1213.13  38
  -2  -7   8 25379.1 1406.06  18
  -2  -7   8 23992.0 2204.31  19
  -2  -7   8 26964.1 1767.98   8
   2   7  -8 30549.9 1872.02  10
  -2  -7   8 24477.9 1922.49   3
   2   7  -7 16013.8 780.722  38
  -2  -7   7 14474.4 943.826  18
  -2  -7   7 14232.2 1611.99  19
   2   7  -7 16946.9 1345.07  10
  -2  -7   7 14896.6 1259.76   8
  -2  -7   7 15532.1 1443.80   3
   2   7  -6 67998.6 2769.01  38
  -2  -7   6 63591.8 2994.41  18
  -2  -7   6 65073.5 3708.54   3
  -2  -7   6 70049.3 3533.29   8
   2   7  -6 72563.5 3578.48  10
   2   7  -5 6207.17 399.517  38
   2   7  -5 6078.19 783.917  10
  -2  -7   5 6334.66 807.556   8
  -2  -7   5 5811.07 858.264   3
   2   7  -4 111144. 4994.47  10
   2   7  -4 105727. 4106.90  38
   2   7  -3 1555.93 440.501  10
   2   7  -3 1154.66 159.694  38
  -2  -7   3 1017.95 233.201  18
   2   7  -2 88111.3 4233.58  10
  -2  -7   2 95677.8 4482.65   3
   2   7  -1 3036.88 256.410  38
  -2  -7   1 2154.88 323.229  18
  -2  -7   1 2649.68 600.419   3
   2   7   0 96620.7 3712.34  38
  -2  -7   0 82798.5 3906.46  18
  -2  -7   0 91170.8 4722.33   3
   2   7   1 6734.13 413.625  38
  -2  -7  -1 6109.72 547.871  18
   2   7   1 6329.54 860.784  10
  -2  -7  -1 6299.04 902.637   3
   2   7   2 57752.8 2391.71  38
  -2  -7  -2 54653.1 2614.43  18
   2   7   2 58153.5 2604.75  15
   2   7   2 62041.5 3302.74  10
  -2  -7  -2 62294.9 3441.80   3
   2   7   3 2437.07 224.387  38
   2   7   3 2777.68 332.397  15
  -2  -7  -3 2125.47 317.702  18
   2   7   3 3160.72 606.115  10
  -2  -7  -3 3692.77 678.207   3
   2   7   4 954.820 135.587  38
   2   7   4 689.162 211.491  40
   2   7   4 865.455 187.717  15
  -2  -7  -4 1271.14 240.067  18
   2   7   4 1333.39 408.233  10
  -2  -7  -4 890.318 389.634   3
   2   7   5-20.6286 119.675  40
   2   7   5 72.4123 51.7208  38
   2   7   5-14.5410 93.2647  15
   2   7   5-46.1063 189.133  10
  -2  -7  -5 53.8172 194.695   3
   2   7   6 4966.57 488.023  40
   2   7   6 5959.52 779.386  10
   2   7   6 5683.11 454.578  15
  -2  -7  -6 6815.13 883.182   3
  -2  -7  -7 9836.33 1075.58   8
   2   7   7 9114.94 878.279  25
  -2  -7  -8 25320.1 1814.43   8
   2   7   8 25495.9 1623.67  25
  -2  -7  -9 2100.80 468.278   8
   2   7   9 2193.29 401.429  25
  -2  -7 -10 17332.4 1299.35   8
   2   7  10 18004.8 1217.22  25
   2   7  11 1122.42 260.648  25
   2   7  12 22938.2 1294.11  25
   2   7  13 104.442 100.044  25
   2   7  13 158.965 177.529  16
   2   7  14 12429.8 868.619  16
  -2  -8  20 1248.32 248.266  23
  -2  -8  20 764.405 239.053  31
  -2  -8  19 5087.93 578.256  23
  -2  -8  19 4267.99 577.686  31
  -2  -8  18 432.199 241.173  23
  -2  -8  18 483.824 255.037  31
  -2  -8  17 15522.8 1310.09  23
  -2  -8  17 16504.4 1372.29  31
  -2  -8  16 6258.23 842.649  31
  -2  -8  15 32254.0 2194.20  31
  -2  -8  14 18599.9 1586.87  31
  -2  -8  13 42517.4 2677.83  31
  -2  -8  12 12497.6 1296.32  31
   2   8 -12 13869.4 937.189  40
   2   8 -11 75565.6 3171.16  38
   2   8 -11 76923.1 3540.72  40
  -2  -8  11 68091.8 3381.16  18
  -2  -8  11 75422.7 4090.94  31
  -2  -8  11 81516.7 4968.73   4
   2   8 -10 9327.95 543.080  38
   2   8 -10 9187.74 792.397  40
  -2  -8  10 11519.3 633.452  35
  -2  -8  10 8154.66 692.771  18
  -2  -8  10 8638.27 1056.41  31
   2   8 -10 9719.01 971.830  10
  -2  -8   9 27408.7 1172.97  35
   2   8  -9 22874.4 1082.39  38
  -2  -8   9 22236.3 1307.21  18
  -2  -8   9 18725.8 1638.72  31
  -2  -8   9 17506.7 1488.27   8
   2   8  -9 24242.1 1681.79  10
   2   8  -8 8.91304 68.9530  38
  -2  -8   8 61.8334 138.071  18
   2   8  -8 44.1844 200.378  10
  -2  -8   8 217.438 230.301   8
   2   8  -7 23307.9 1076.17  38
  -2  -8   7 21001.3 1281.46  18
   2   8  -7 24994.9 1745.31  10
  -2  -8   7 20088.8 1617.10   8
   2   8  -6 6438.68 425.548  38
  -2  -8   6 5667.06 567.787  18
  -2  -8   6 6388.02 826.822   8
   2   8  -6 7617.69 914.460  10
  -2  -8   6 6978.32 1000.11   3
   2   8  -5 18736.6 911.387  38
  -2  -8   5 18248.1 1686.71   3
  -2  -8   5 17437.5 1495.28   8
   2   8  -5 17883.9 1506.10  10
   2   8  -4 3035.35 267.530  38
   2   8  -4 2827.49 583.879  10
  -2  -8   4 3226.11 620.256   8
  -2  -8   4 2521.51 358.961  18
  -2  -8   3 13031.2 932.184  18
   2   8  -3 15372.2 909.192  15
  -2  -8   3 13237.6 1415.22   3
   2   8  -3 16593.4 1425.80  10
  -2  -8   3 18706.7 1532.07   8
   2   8  -2 31226.8 1347.08  38
  -2  -8   2 25775.4 1520.03  18
   2   8  -2 27864.6 1474.58  15
  -2  -8   2 30208.1 2225.73   3
  -2  -8   2 34119.7 2231.69   8
   2   8  -2 29244.7 2057.09  10
   2   8  -1 33606.6 1434.28  38
  -2  -8   1 27527.6 1618.93  18
   2   8  -1 32039.6 1590.55  15
  -2  -8   1 30574.1 2293.32   3
  -2  -8   1 33019.9 2152.95   7
  -2  -8   0 15328.0 1510.87   3
   2   8   0 16390.1 804.350  38
  -2  -8   0 13972.2 980.093  18
   2   8   0 16257.6 951.811  15
   2   8   1 12540.8 669.548  38
  -2  -8  -1 12482.6 873.160  18
  -2  -8  -1 12440.7 1359.91   3
  -2  -8  -1 14092.5 1337.93   8
   2   8   1 13099.7 1291.44  10
   2   8   2 3563.50 282.265  38
   2   8   2 3202.69 438.728  40
  -2  -8  -2 3044.83 398.426  18
   2   8   2 3714.25 386.602  15
  -2  -8  -2 2986.77 676.484   3
   2   8   2 3154.96 638.293  10
  -2  -8  -2 4855.70 763.743   8
   2   8   3 9042.42 501.924  38
   2   8   3 7666.19 692.948  40
   2   8   3 8390.60 618.480  15
  -2  -8  -3 9784.07 1093.48   8
   2   8   3 10148.0 1086.09  10
  -2  -8  -3 7722.63 1042.45   3
   2   8   4 8861.07 711.006  40
  -2  -8  -4 8838.44 1077.22   3
   2   8   4 8480.37 989.699  10
  -2  -8  -4 10436.1 1130.31   8
   2   8   5 31014.4 2086.44  10
  -2  -8  -5 36011.9 2317.83   8
  -2  -8  -6 5723.84 808.152   8
  -2  -8  -7 25180.7 1789.20   8
  -2  -8  -8 5901.00 734.852   8
  -2  -8  -9 12814.7 1052.40   8
   2   8  10 57.5889 141.974  16
   2   8  11 21602.6 1323.06  16
  -2  -9  18 6325.75 604.720  31
  -2  -9  17 638.311 222.540  31
  -2  -9  16 14037.0 1098.02  31
  -2  -9  15 1087.18 324.703  31
  -2  -9  15 1177.88 354.920  23
  -2  -9  14 52106.4 2696.63  31
  -2  -9  14 44648.5 2665.76  23
  -2  -9  13 5972.67 755.826  31
  -2  -9  12 36937.7 2151.25  31
   2   9 -12 32154.6 1695.66  40
   2   9 -11 3827.14 460.417  40
   2   9 -11 5440.20 646.293  10
   2   9 -10 48807.0 2458.53  40
  -2  -9  10 49387.3 3708.36   4
   2   9 -10 54646.2 2797.90  10
   2   9  -9 330.460 191.075  40
  -2  -9   9 524.917 517.828   4
   2   9  -9 654.297 311.752  10
   2   9  -8 66404.6 3227.97  40
   2   9  -8 73888.8 3656.39  10
  -2  -9   7 1786.90 449.785   8
   2   9  -7 2415.31 534.441  10
  -2  -9   6 16751.6 1458.93   8
   2   9  -6 18891.1 1516.93  10
  -2  -9   5 14120.1 1354.45   8
   2   9  -5 16947.1 1439.16  10
  -2  -9   4 19917.2 1651.67   8
   2   9  -4 20520.7 1638.32  10
   2   9  -3 9704.81 1062.56  10
  -2  -9   3 9206.66 1070.71   8
  -2  -9   2 7326.30 957.504   8
   2   9  -2 6064.97 840.000  10
   2   9  -1 239.796 182.386  40
   2   9   0-25.3709 138.766  40
   2   9   1 5613.03 580.158  40
   2   9   1 7416.27 916.242  10
  -2  -9  -1 5683.64 837.898   8
   2   9   2 1178.23 261.786  40
   2   9   2 1561.44 432.251  10
  -2  -9  -2 1700.93 466.807   8
   2   9   3 1602.67 274.099  40
  -2  -9  -3 1593.53 461.077   8
   2   9   3 1280.32 386.130  10
   2   9   4 4187.69 634.310  10
  -2  -9  -4 4591.46 710.320   8
  -2  -9  -5 3302.05 586.175   8
  -2  -9  -5 3675.13 632.304   7
  -2  -9  -5 3994.64 853.628   4
  -2  -9  -6 9065.76 940.836   8
  -2  -9  -6 11184.4 1063.89   7
  -2  -9  -7 7351.60 805.827   8
  -2  -9  -7 13494.8 1100.31   7
   2   9   8 23057.1 1390.75  16
  -2  -9  -8 23780.5 1572.20   7
   2   9   9 12974.6 926.866  16
  -2  -9  -9 16517.6 1132.08   7
  -2 -10  16 9434.81 738.075  23
  -2 -10  15 442.776 188.029  23
  -2 -10  14 17059.1 1209.04  23
  -2 -10  13-31.3998 154.806  23
  -2 -10  12 6320.82 718.898  23
   2  10 -12 5252.93 440.709  40
   2  10 -11 19539.7 1097.62  40
   2  10 -10 17594.8 1060.08  40
   2  10  -9 13291.8 912.008  40
  -2 -10   9 13223.5 1652.58   4
   2  10  -9 13990.9 1109.99  10
   2  10  -8 28637.8 1586.86  40
  -2 -10   8 29009.0 2629.81   4
   2  10  -8 30806.6 1876.96  10
   2  10  -7 31215.8 1717.47  40
  -2 -10   7 36286.4 2987.08   4
   2  10  -7 32870.7 2030.97  10
   2  10  -6 37860.9 1977.03  40
  -2 -10   6 40910.9 3281.17   4
   2  10  -6 38414.9 2305.91  10
   2  10  -5 28808.1 1545.14  40
   2  10  -5 29576.6 1892.68  10
  -2 -10   4 18933.7 1579.33   8
   2  10  -4 25893.9 1724.86  10
  -2 -10   3 4631.07 709.888   8
   2  10  -3 5388.97 737.904  10
   2  10  -2 12192.4 882.468  40
  -2 -10   2 10462.8 1111.33   8
   2  10  -2 12368.6 1132.48  10
   2  10  -1 1047.46 251.208  40
   2  10   0 4883.12 493.415  40
  -2 -10   0 5233.02 1074.33   4
   2  10   0 5199.92 720.035  10
   2  10   1 139.052 116.509  40
   2  10   1 116.264 167.625  10
  -2 -10  -1 123.093 186.123   8
  -2 -10  -1-83.0135 358.969   4
  -2 -10  -2 933.814 325.209   8
  -2 -10  -2 675.386 448.419   4
  -2 -10  -3 686.366 289.511   8
  -2 -10  -3 966.003 441.264   4
  -2 -10  -4 1127.04 322.989   8
  -2 -10  -4 919.024 390.718   4
   2  10   5 245.012 136.683  16
   2  10   6 1695.24 266.339  16
  -2 -11  12 2143.58 314.010  23
  -2 -11  11 8454.51 693.236  23
   2  11 -10 44.3623 67.8350  40
  -2 -11  10 21.8586 115.766  23
   2  11  -9 18411.0 981.187  40
  -2 -11   9 17849.7 1158.76  23
  -2 -11   8 2112.06 591.462   4
   2  11  -8 1851.47 264.385  40
  -2 -11   7 28210.0 2340.43   4
   2  11  -7 32225.1 1553.62  40
  -2 -11   6 142.997 338.780   4
   2  11  -6 252.953 145.290  40
   2  11  -5 27059.0 1387.37  40
  -2 -11   4 68.3912 337.180   4
  -2 -11   3 15354.7 1639.32   4
   2  11  -3 17357.9 983.991  40
  -2 -11   2 258.578 265.768   4
   2  11  -2 532.553 150.934  40
  -2 -11   1 7420.82 1046.78   4
   2  11  -1 8616.97 580.469  40
  -2 -11   0 54.3489 246.479   4
  -2 -11  -1 6942.09 887.413   4
  -2 -11  -2 798.324 341.190   9
  -2 -11  -2 828.588 291.840   4
   3 -12  -1 2911.17 649.987   9
   3 -12   0 22323.1 1894.36   9
   3 -12   1 2588.34 645.603   9
   3 -12   2 6837.79 539.129  33
   3 -12   3-71.3722 276.264   9
   3 -12   3 387.764 134.867  33
  -3  12  -4 11301.2 867.743   1
   3 -12   4 11316.3 1389.17   9
   3 -12   4 12702.5 793.508  33
  -3  12  -5 5692.36 580.374   1
   3 -12   5 4290.52 857.590   9
   3 -12   5 5445.82 481.844  33
  -3  12  -6 1851.68 348.687   1
   3 -12   6 1973.95 276.380  33
   3 -12   7 3927.00 391.820  33
  -3  12  -8 20.1764 126.428   1
   3 -12   8 31.2858 77.1269  33
  -3  12  -9 11784.5 813.915   1
   3 -12   9 11318.3 728.802  33
  -3  12 -10 5026.20 467.918   1
   3 -11  -6 2801.37 533.514   9
   3 -11  -6 2895.17 480.966   7
   3 -11  -5 4620.79 835.191   9
   3 -11  -4 17980.4 1803.99   9
   3 -11  -3 9773.88 1363.40   9
   3 -11  -3 8417.50 1007.10   7
   3 -11  -2 12449.9 1626.89   9
   3 -11  -2 12993.2 1265.96   7
   3 -11  -1 6928.86 1227.85   9
   3 -11  -1 5841.45 853.248   7
   3 -11   0 18756.6 2056.76   9
   3 -11   0 15809.6 1492.09   7
   3 -11   1 23570.0 2364.63   9
   3 -11   1 20093.4 1712.18   7
  -3  11  -1 21578.6 1460.45   1
   3 -11   2 25475.5 1987.79   7
  -3  11  -2 29561.5 1798.99   1
   3 -11   3 12234.6 1284.18   7
  -3  11  -3 12988.9 1102.65   1
   3 -11   4 21509.1 2317.20   9
   3 -11   4 17956.8 1606.22   7
  -3  11  -4 23181.7 1533.32   1
   3 -11   5 2173.41 752.189   9
  -3  11  -5 1764.58 435.114   1
   3 -11   6 13264.3 1753.55   9
   3 -11   6 13643.9 1011.02  33
  -3  11  -7 8531.01 839.124   1
   3 -11   7 7983.19 1325.90   9
   3 -11   7 7605.04 709.586  33
   3 -11   8 20091.1 1291.82  33
  -3  11  -8 21675.1 1425.71   1
   3 -11   9 249.326 137.012  33
  -3  11  -9 706.533 258.088   1
   3 -11  10 1006.37 235.030  33
  -3  11 -10 1092.39 294.325   1
   3 -11  11 3860.92 449.792  33
  -3  11 -11 4130.49 511.841   1
   3 -11  12 880.710 212.238  33
  -3  11 -12 1213.41 267.764   1
   3 -11  13 7848.54 624.003  33
  -3  11 -13 7995.84 640.568   1
  -3  11 -14 10914.3 695.776   1
  -3  10  10 61.2786 115.186  21
   3 -10 -10 83.3401 165.592   7
   3 -10  -9 2620.26 476.187   7
   3 -10  -8 1425.28 405.177   7
   3 -10  -7 597.651 344.918   7
   3 -10  -7 481.430 352.466   9
   3 -10  -6 554.804 338.241   7
   3 -10  -6 249.507 394.271   9
   3 -10  -5 566.808 466.040   9
   3 -10  -5 378.929 347.591   7
   3 -10  -4 205.355 421.258   9
   3 -10  -3 19101.4 2236.06   9
   3 -10  -2 677.687 535.354   9
   3 -10  -2 835.092 553.151   4
  -3  10   2 422.311 247.013   1
   3 -10  -1 15614.8 1591.69   7
   3 -10  -1 18109.6 2204.61   9
  -3  10   1 16956.7 1323.89   1
   3 -10   0 68.1534 309.143   7
   3 -10   0-118.071 361.059   9
  -3  10   0 378.699 263.739   1
   3 -10   0 230.128 416.312   4
   3 -10   1 50809.0 3988.62   9
   3 -10   1 45416.2 3090.11   7
  -3  10  -1 52724.8 2760.00   1
   3 -10   2 4953.63 918.980   7
   3 -10   2 3120.55 1026.53   4
  -3  10  -2 5050.82 731.604   1
   3 -10   3 71752.9 3993.08   7
   3 -10   3 55508.7 4430.13   4
   3 -10   4 340.829 427.179   7
   3 -10   4 374.757 615.892   9
   3 -10   4-121.054 468.219   4
   3 -10   5 142342. 7622.26   9
   3 -10   5 139426. 6459.68   7
   3 -10   6 1582.02 798.849   9
   3 -10   6 786.215 421.775   7
   3 -10   7 50043.6 4003.13   9
   3 -10   7 53950.8 2787.97  33
   3 -10   8 449.327 461.914   9
   3 -10   8 1018.53 303.088  33
   3 -10   9 1788.65 364.924  33
   3 -10  10 8472.05 810.186  33
   3 -10  11 6597.19 685.044  23
   3 -10  11 8197.42 776.564  33
   3 -10  12 4412.70 535.991  23
   3 -10  12 3783.33 509.717  33
   3 -10  13 2109.70 349.967  23
   3 -10  13 1732.35 332.266  33
   3 -10  14 844.696 223.577  23
   3 -10  14 483.436 185.662  33
  -3  10 -15 325.655 136.314   1
   3 -10  15 559.062 184.139  23
   3 -10  16 2989.01 359.547  23
   3 -10  17 1428.87 217.124  23
   3  -9 -12 16625.3 1234.63   7
  -3   9  12 19148.2 1237.84  21
   3  -9 -11 2076.48 456.143   7
   3  -9 -10 13139.3 1231.25   7
   3  -9  -9 102.101 279.234   7
  -3   9   9 81.9780 139.842  16
   3  -9  -8 5759.12 1086.18   9
   3  -9  -8 7463.51 978.178   7
  -3   9   8 6192.99 671.646  16
   3  -9  -7-59.0407 312.665   7
   3  -9  -7 581.900 459.375   9
  -3   9   7 29.8257 135.266  16
   3  -9  -6 13678.0 1423.26   7
   3  -9  -6 12546.4 1793.45   9
  -3   9   6 12072.2 988.958  16
   3  -9  -5-228.220 348.888   9
   3  -9  -5 255.491 370.535   7
   3  -9  -4 3681.11 1021.92   9
   3  -9  -4 3946.88 789.272   7
  -3   9   4 3519.21 585.729   1
   3  -9  -4 2238.01 781.502   4
  -3   9   3 401.510 103.335  38
   3  -9  -3 568.874 539.167   4
  -3   9   3 609.025 279.496   1
   3  -9  -3 852.809 600.857   9
  -3   9   2 1430.10 181.456  38
  -3   9   2 1574.21 213.676  15
  -3   9   2 1926.85 449.594   1
   3  -9  -2 473.578 515.009   4
   3  -9  -2 1965.80 771.901   9
  -3   9   1 4375.96 343.419  38
  -3   9   1 4751.22 390.442  15
   3  -9  -1 4606.43 1161.68   4
  -3   9   1 4877.81 732.027   1
   3  -9  -1 6173.47 1330.18   9
  -3   9   0 7826.27 506.308  38
  -3   9   0 9005.52 563.729  15
   3  -9   0 6513.37 1361.13   4
  -3   9   0 9165.68 995.207   1
   3  -9   0 9123.74 1210.21   7
   3  -9   0 9381.56 1650.15   9
  -3   9  -1 27784.5 1313.07  38
  -3   9  -1 29207.6 1352.22  15
   3  -9   1 32151.0 2419.09   7
   3  -9   1 34635.8 3159.32   9
  -3   9  -2 30494.8 1384.56  15
   3  -9   2 29437.1 2368.54   7
  -3   9  -3 20332.6 1041.89  38
  -3   9  -3 24168.3 1092.77  15
   3  -9   3 25160.8 2101.50   7
  -3   9  -4 37375.4 1736.30  38
  -3   9  -4 43245.6 1768.68  15
   3  -9   4 41392.1 2895.81   7
  -3   9  -5 13470.0 724.356  38
   3  -9   5 14602.2 1585.15   7
   3  -9   5 14783.9 2053.81   9
  -3   9  -6 7355.15 473.189  38
   3  -9   6 10181.9 1682.38   9
   3  -9   6 8281.46 1177.02   7
  -3   9  -7 32222.5 1435.21  38
   3  -9   7 27964.6 3046.52   4
   3  -9   7 29751.6 2415.14   7
  -3   9  -8 19576.4 949.104  38
   3  -9   8 22351.2 1494.29  33
   3  -9   8 19816.4 2364.14   9
   3  -9   9 49133.7 3777.84   9
  -3   9  -9 39945.3 1778.97  38
   3  -9   9 52222.7 2507.83  33
   3  -9   9 39689.0 2339.98  23
   3  -9  10 27245.1 1707.93  33
   3  -9  10 22954.1 1627.70  23
   3  -9  11 12515.6 1053.26  33
   3  -9  11 10077.2 998.192  23
   3  -9  12 8639.93 861.530  33
   3  -9  12 8487.32 878.787  23
   3  -9  13 5424.25 645.256  33
   3  -9  13 4640.35 634.608  23
   3  -9  14 2921.07 472.570  33
   3  -9  14 3289.67 509.660  23
   3  -9  15-31.7404 143.950  31
   3  -9  15 191.788 163.543  23
   3  -9  16 1898.27 368.240  31
   3  -9  16 2069.20 382.367  23
   3  -9  17 2395.85 381.812  31
   3  -9  17 2572.93 405.057  23
   3  -9  18 2333.53 433.380  30
   3  -9  18 3081.05 392.495  23
  -3   8  15 11337.3 840.848  21
   3  -8 -14 17416.4 1271.07   7
  -3   8  14 24157.7 1434.57  21
   3  -8 -13 10482.8 1012.08   7
  -3   8  13 11880.7 1043.16  21
   3  -8 -12 15284.6 1323.76   7
  -3   8  12 13674.5 900.012  36
   3  -8 -11 19415.0 1565.19   7
  -3   8  11 14383.8 1006.04  36
  -3   8  11 17956.6 1275.74  16
   3  -8 -10 10033.5 1150.71   7
  -3   8  10 8321.10 719.179  36
  -3   8  10 9269.97 898.088  16
   3  -8  -9 58717.2 3323.92   7
  -3   8   9 55024.6 2817.31  16
   3  -8  -8 25144.2 2516.80   9
   3  -8  -8 28978.9 2139.52   7
  -3   8   8 20781.3 1390.55  36
  -3   8   8 26169.8 1670.21  16
   3  -8  -7 52345.2 3181.05   7
   3  -8  -7 55105.3 3996.52   9
  -3   8   7 44669.7 2389.32  36
  -3   8   7 48271.1 2623.99  16
  -3   8   6 1180.26 278.013  36
  -3   8   6 1264.07 349.478  16
  -3   8   6 1475.79 224.193  15
   3  -8  -6 2401.11 623.255   7
   3  -8  -6 1494.09 721.975   9
  -3   8   6 1005.67 361.478   1
  -3   8   5 19641.0 951.242  38
  -3   8   5 21918.2 1457.37  16
   3  -8  -5 27989.1 2763.99   9
   3  -8  -5 24358.7 1955.55   7
   3  -8  -5 15495.5 2022.20   4
  -3   8   5 20891.7 1561.14   1
  -3   8   4 647.074 120.919  38
  -3   8   4 579.770 242.246  16
  -3   8   4 583.130 149.307  15
   3  -8  -4 840.902 396.167   7
   3  -8  -4 596.196 610.448   9
   3  -8  -4 110.020 369.159   4
  -3   8   4 394.760 269.134   1
  -3   8   3 5631.10 387.699  38
  -3   8   3 5785.13 438.351  15
   3  -8  -3 5985.68 936.169   7
  -3   8   3 6250.53 803.384   1
   3  -8  -3 5080.60 1155.26   4
  -3   8   2 1548.60 191.414  38
  -3   8   2 1964.85 238.076  15
   3  -8  -2 1791.41 557.338   7
   3  -8  -2 1836.81 722.461   4
  -3   8   2 2380.50 494.276   1
  -3   8   1 546.037 122.618  38
  -3   8   1 544.663 130.664  15
   3  -8  -1 343.877 470.689   4
  -3   8   1 968.613 341.228   1
  -3   8   0 6729.80 443.838  38
   3  -8   0 6754.36 1326.75   4
  -3   8   0 7181.20 478.517  15
  -3   8  -1 2991.43 283.275  15
   3  -8   1 4090.00 1125.70   9
   3  -8   1 2213.75 604.739   7
   3  -8   1 2857.99 944.438   4
  -3   8  -2 346.429 102.468  38
  -3   8  -2 365.779 108.096  15
   3  -8   2 405.661 346.152   7
   3  -8   2 114.205 441.874   4
  -3   8  -3 301.368 102.192  38
  -3   8  -3 348.261 102.938  15
   3  -8   3 592.140 512.230   9
   3  -8   3 273.077 349.504   7
   3  -8   3 684.808 562.829   4
  -3   8  -4 23923.6 1166.83  38
  -3   8  -4 27651.4 1200.61  15
   3  -8   4 25622.8 2155.54   7
   3  -8   4 30791.2 2908.60   9
   3  -8   4 19762.9 2363.44   4
   3  -8   5 1050.36 618.809   9
   3  -8   5 1117.47 506.264   7
  -3   8  -5 789.632 138.135  38
  -3   8  -5 794.482 132.492  15
   3  -8   6 26796.1 2797.39   9
   3  -8   6 25181.7 2164.58   7
  -3   8  -6 26720.8 1202.32  38
   3  -8   6 20105.5 2489.14   4
   3  -8   7 1393.70 694.293   9
   3  -8   7 1779.66 570.093   7
  -3   8  -7 1395.53 174.631  38
   3  -8   7 1111.82 677.788   4
  -3   8  -8 60485.6 2385.12  38
   3  -8   8 44137.1 3990.69   4
   3  -8   8 60902.8 4355.69   9
   3  -8   8 49668.1 3444.30   7
   3  -8   8 50167.0 2940.89  23
   3  -8   9 1145.43 651.384   9
   3  -8   9 2553.21 454.181  33
   3  -8   9 1973.74 445.426  23
  -3   8  -9 2344.86 220.196  38
   3  -8  10 43939.4 3608.60   9
   3  -8  10 50158.5 2579.82  33
   3  -8  10 43751.1 2572.76  23
  -3   8 -10 44028.5 1887.36  38
   3  -8  11 767.394 315.394  23
   3  -8  11 649.241 268.003  33
   3  -8  11 1114.08 366.864  31
   3  -8  12 35701.0 2162.81  33
   3  -8  12 36471.8 2292.67  31
   3  -8  12 34031.8 2201.19  23
   3  -8  13 1534.82 424.697  31
   3  -8  13 1348.16 368.195  33
   3  -8  13 1063.65 357.265  23
   3  -8  14 2027.42 486.449  31
   3  -8  14 1883.10 403.566  33
   3  -8  14 2335.03 490.352  23
   3  -8  14 2265.34 493.726  27
   3  -8  15 2434.51 442.973  33
   3  -8  15 2275.90 512.333  31
   3  -8  15 2298.34 475.978  23
   3  -8  15 3386.27 582.305  27
   3  -8  16 1770.08 430.448  31
   3  -8  16 1103.04 329.846  23
   3  -8  17 7527.26 857.028  31
   3  -8  17 8769.35 844.598  23
   3  -8  18 5508.14 673.256  31
   3  -8  18 5836.35 751.574  30
   3  -8  18 5406.21 626.303  23
   3  -8  19 6874.11 768.989  30
   3  -8  19 7339.06 734.331  31
   3  -8  19 8373.85 727.565  23
   3  -8  20 907.904 253.146  30
   3  -8  20 727.947 196.842  34
   3  -8  20 1076.82 241.866  23
  -3   7  16 3868.13 363.335  37
  -3   7  16 3889.45 532.965  21
   3  -7 -15 9746.98 898.163   7
  -3   7  15 11593.2 1025.76  21
   3  -7 -14 4333.43 659.743   7
  -3   7  14 3460.50 427.442  36
  -3   7  14 4281.42 661.715  21
   3  -7 -13 33823.4 2161.38   7
  -3   7  13 27041.3 1648.76  36
  -3   7  13 32960.5 1938.48  16
   3  -7 -12 8775.96 1056.53   7
  -3   7  12 7344.49 720.993  36
  -3   7  12 9481.01 948.059  16
   3  -7 -11 82354.4 4180.50   7
  -3   7  11 76688.8 3749.03  16
  -3   7  10 941.111 274.911  36
  -3   7  10 1128.10 354.268  16
  -3   7   9 78326.4 3758.42  36
  -3   7   9 82972.1 4023.52  16
   3  -7  -8 8906.37 1442.82   9
  -3   7   8 8133.40 775.979  36
  -3   7   8 8650.39 924.270  16
  -3   7   7 43174.8 2509.29  16
  -3   7   7 44313.0 2002.23  15
   3  -7  -7 51431.2 3788.56   9
  -3   7   7 46991.1 2641.47   1
  -3   7   6 4273.64 304.757  38
  -3   7   6 4634.61 386.790  15
  -3   7   6 4990.68 650.211  16
  -3   7   6 5868.41 738.762   1
  -3   7   5 27415.5 1241.68  38
  -3   7   5 27200.2 1746.76  16
   3  -7  -5 32341.2 2259.00   7
  -3   7   5 30926.2 1928.82   1
  -3   7   4 5477.13 362.993  38
  -3   7   4 5442.99 412.117  15
  -3   7   4 5385.86 637.830  16
   3  -7  -4 7051.65 968.695   7
   3  -7  -4 5019.24 1057.86   4
  -3   7   4 6519.35 779.094   1
  -3   7   3 54250.3 2195.50  38
  -3   7   3 50309.8 2246.81  15
   3  -7  -3 58046.1 3257.04   7
  -3   7   3 56443.2 2925.07   1
  -3   7   2 22653.1 1029.74  38
  -3   7   2 20968.8 1059.45  15
   3  -7  -2 24916.8 1874.27   7
  -3   7   2 24091.8 1623.39   1
  -3   7   1 24679.5 1130.56  38
  -3   7   1 24849.6 1162.96  15
   3  -7  -1 25000.5 1921.94   7
   3  -7  -1 20983.5 2302.75   4
  -3   7   0 20879.8 965.957  38
  -3   7   0 19802.5 978.692  15
   3  -7   0 17613.5 2040.47   4
  -3   7  -1 3509.33 289.116  15
   3  -7   1 3636.44 921.249   4
  -3   7  -2 26407.3 1187.39  38
  -3   7  -2 26513.2 1199.51  15
   3  -7   2 25800.9 2047.84   7
   3  -7   2 24010.9 2423.19   4
  -3   7  -3 266.865 88.2796  38
  -3   7  -3 482.061 109.975  15
   3  -7   3 354.061 302.209   7
   3  -7   3 814.149 520.839   9
   3  -7   3 295.894 357.073   4
  -3   7  -4 418.806 99.0342  38
  -3   7  -4 563.257 114.151  15
   3  -7   4 1115.36 571.972   9
   3  -7   4 783.160 359.579   7
   3  -7   4 791.244 487.992   4
   3  -7   5 4322.36 801.503   7
   3  -7   5 5884.82 1168.13   9
  -3   7  -5 4927.08 337.098  38
  -3   7  -5 5134.96 335.058  15
   3  -7   6 508.118 338.148   7
   3  -7   6 616.571 467.317   9
  -3   7  -6 1068.39 141.200  38
   3  -7   6 215.409 467.002   4
  -3   7  -7 25759.1 1114.09  38
   3  -7   7 19924.6 2315.17   4
   3  -7   7 22247.9 1980.61   7
   3  -7   7 26763.3 2555.49   9
   3  -7   7 20758.2 1547.30  23
  -3   7  -8 18559.2 826.006  38
   3  -7   8 10925.8 1714.55   4
   3  -7   8 15633.3 1972.40   9
   3  -7   8 15508.4 1616.00   7
   3  -7   8 13671.5 1222.05  23
   3  -7   9 9501.67 1505.62   9
   3  -7   9 9274.51 972.214  23
  -3   7  -9 10702.6 559.442  38
   3  -7  10 2431.11 785.269   9
   3  -7  10 2702.62 534.317  31
   3  -7  10 2529.29 501.955  23
  -3   7 -10 2801.35 229.586  38
   3  -7  11 17666.4 1431.40  23
   3  -7  11 18772.2 1535.45  31
   3  -7  12 8788.00 971.710  23
   3  -7  12 8176.58 1008.12  31
   3  -7  13 18307.6 2214.01   6
   3  -7  13 16532.7 1452.37  31
   3  -7  13 13506.1 1281.87  23
   3  -7  14 316.144 269.653  31
   3  -7  14 180.830 239.497  23
   3  -7  14 52.9864 240.382  27
   3  -7  15 42507.9 2633.57  31
   3  -7  15 41257.7 2479.47  23
   3  -7  15 40238.6 2571.60  27
   3  -7  16 125.965 222.377  23
   3  -7  16 45.5491 196.972  27
   3  -7  17 15952.6 1388.79  31
   3  -7  17 15624.4 1282.13  23
   3  -7  18 292.972 249.834  30
   3  -7  18-43.2898 196.343  31
   3  -7  18 106.291 193.807  23
   3  -7  19 9336.99 986.275  30
   3  -7  19 10251.9 985.109  31
   3  -7  19 9479.42 870.206  23
   3  -7  20-32.7735 179.261  30
   3  -7  20 62.8170 177.082  31
   3  -7  20 177.671 162.794  23
   3  -7  21 6569.24 575.614  23
  -3   6  18 6890.46 516.370  37
  -3   6  18 6585.53 675.225  21
  -3   6  17 5814.86 542.121  37
  -3   6  17 6785.65 754.135  21
  -3   6  16 16262.3 1353.51  21
   3  -6 -15 3164.63 562.774   7
  -3   6  15 2997.52 429.572  36
  -3   6  15 2416.54 541.547  21
  -3   6  14 14675.9 1133.49  36
  -3   6  14 15617.2 1442.53  21
  -3   6  14 16855.6 1342.13  16
   3  -6 -14 17319.4 1469.59   7
  -3   6  14 17723.4 1194.89  25
  -3   6  13 354.477 176.423  36
  -3   6  13 42.2268 182.751  16
  -3   6  12 28869.5 1785.20  36
  -3   6  12 31746.3 2018.21  16
  -3   6  11 3463.97 504.033  36
  -3   6  11 3613.95 616.081  16
  -3   6  10 42826.9 2391.80  36
  -3   6  10 48387.4 2656.29  16
  -3   6   9 13842.1 1081.64  36
  -3   6   9 14129.8 1213.08  16
  -3   6   8 55168.8 2961.47  16
  -3   6   8 55536.8 3010.56   1
  -3   6   7 56027.4 2337.03  38
  -3   6   7 61768.0 2479.13  15
  -3   6   7 58030.0 3005.83  16
  -3   6   7 55560.4 2361.80  11
  -3   6   7 60924.2 3120.98   1
  -3   6   6 72856.1 3025.89  38
  -3   6   6 72117.5 3626.11  16
  -3   6   6 79623.0 3152.51  15
  -3   6   6 83448.4 3842.64   1
  -3   6   5 39987.5 1681.18  38
  -3   6   5 36394.4 2142.22  16
  -3   6   4 82693.3 3233.13  38
  -3   6   4 75981.8 3700.37  16
  -3   6   4 78936.4 3292.10  15
  -3   6   3 17685.6 806.211  38
  -3   6   3 15735.8 834.077  15
  -3   6   3 16922.0 1272.43   1
  -3   6   2 26690.9 1238.86  15
   3  -6  -2 32181.8 2008.96   7
  -3   6   1 2415.13 222.717  15
   3  -6  -1 2040.45 470.523   7
  -3   6   0 23941.6 1092.25  15
  -3   6  -1 60063.6 2465.69  15
  -3   6  -2 18576.3 866.431  15
  -3   6  -3 17824.2 828.720  15
  -3   6  -4 16365.7 766.477  15
  -3   6  -5 20220.4 892.021  15
   3  -6   5 14620.2 1819.05   4
  -3   6  -6 58155.5 2326.72  38
  -3   6  -6 58805.4 2298.99  15
   3  -6   6 45190.1 3150.72   7
   3  -6   6 37491.7 3428.63   4
  -3   6  -7 4242.98 277.747  38
   3  -6   7 2921.71 808.219   4
   3  -6   7 2955.05 648.450   7
   3  -6   7 4063.28 902.656   9
   3  -6   7 3376.65 512.422  23
   3  -6   8 21062.0 2165.20   9
  -3   6  -8 22635.7 976.306  38
   3  -6   8 16620.9 1991.87   4
   3  -6   8 21822.2 1556.50  31
   3  -6   8 18253.4 1409.37  23
   3  -6   9 960.253 525.785   9
   3  -6   9 640.606 287.153  31
   3  -6   9 557.015 239.449  23
  -3   6  -9 659.257 106.396  38
  -3   6 -10 15208.0 716.150  11
   3  -6  10 13768.3 1757.29   9
  -3   6 -10 15369.8 712.346  38
   3  -6  10 13614.6 1270.24  31
   3  -6  10 12810.8 1172.28  23
   3  -6  11 10604.1 1126.18  31
   3  -6  11 11093.0 1072.73  23
   3  -6  12 25167.6 1866.72  31
   3  -6  12 21575.2 1655.53  23
   3  -6  12 28201.7 2871.91   6
   3  -6  13 1183.25 405.704  31
   3  -6  13 1404.79 399.699  23
   3  -6  13 1146.40 653.476   6
   3  -6  14 3096.70 628.556  31
   3  -6  14 2668.11 559.221  23
   3  -6  14 2504.12 579.870  27
   3  -6  14 4355.76 1081.80   6
   3  -6  15 8352.32 1483.95   6
   3  -6  15 7027.87 970.228  31
   3  -6  15 7977.18 1013.65  27
   3  -6  15 7088.26 884.730  23
   3  -6  16 7921.49 1028.16  31
   3  -6  16 9806.71 1068.47  27
   3  -6  16 8168.74 937.895  23
   3  -6  17 11094.3 1214.58  31
   3  -6  17 11830.1 1110.83  23
   3  -6  17 11023.1 1119.43  27
   3  -6  18 14727.4 1211.27  27
   3  -6  18 12934.9 1267.72  31
   3  -6  18 12008.8 1297.86  30
   3  -6  18 12452.1 1132.01  23
   3  -6  19 9680.26 1058.69  30
   3  -6  19 9546.46 1031.71  31
   3  -6  19 9651.90 925.204  23
   3  -6  20 11154.0 1039.06  30
   3  -6  20 9236.29 878.168  34
   3  -6  20 10994.7 1021.00  31
   3  -6  20 10069.0 893.718  23
   3  -6  21 2948.95 418.802  34
   3  -6  21 3356.45 489.513  30
   3  -6  21 3208.31 498.990  31
  -3   5  19 17216.1 1038.39  37
  -3   5  19 19130.4 1279.80  21
  -3   5  18 115.541 126.476  37
  -3   5  18 149.209 216.448  21
  -3   5  17 36858.2 2302.58  21
  -3   5  16 2987.69 468.180  36
  -3   5  16 3532.49 678.074  21
  -3   5  16 4379.22 726.177  25
  -3   5  15 21162.0 1463.97  36
  -3   5  15 23011.5 1824.60  21
  -3   5  15 19459.4 1772.87  14
  -3   5  15 24370.8 1555.53  25
  -3   5  14 1566.25 351.501  36
  -3   5  14 1607.17 428.274  16
  -3   5  14 1490.43 426.550  25
  -3   5  13 47623.2 2681.80  36
  -3   5  13 57362.5 2990.69  16
  -3   5  13 44984.0 2894.10  20
  -3   5  13 58134.1 2784.98  25
  -3   5  12 3243.07 498.381  36
  -3   5  12 2763.58 569.715  20
  -3   5  12 3092.38 565.448  16
  -3   5  12 3543.99 517.399  25
  -3   5  11 17039.4 1278.48  36
  -3   5  11 19110.6 1462.37  16
  -3   5  11 17562.3 1478.41  20
  -3   5  11 19255.8 1304.78  25
  -3   5  10 12848.4 1037.71  36
  -3   5  10 14282.8 1049.14  25
  -3   5  10 12795.6 1208.03  20
  -3   5  10 12822.9 1145.63  16
  -3   5   9 20482.5 1523.83   1
  -3   5   9 20509.0 1488.34  16
  -3   5   8 23577.3 1036.48  38
  -3   5   8 24964.0 1619.87  16
  -3   5   8 26625.9 1711.07   1
  -3   5   8 24703.9 1065.81  11
  -3   5   7 9764.04 497.306  38
  -3   5   7 10211.9 911.844  16
  -3   5   7 11076.0 600.245  15
  -3   5   7 10036.6 521.177  11
  -3   5   6 119305. 4817.13  38
  -3   5   6 118588. 5381.07  16
  -3   5   6 132415. 4934.19  15
  -3   5   4 65426.8 2682.75  15
  -3   5   3 222.270 86.9981  15
  -3   5   2 39209.0 1660.25  15
  -3   5   1 4546.59 303.903  15
  -3   5   0 318.281 82.5961  15
  -3   5  -1 5821.66 341.693  15
  -3   5  -2 15772.7 726.533  15
  -3   5  -3 113424. 4446.63  15
  -3   5  -4 1127.34 121.813  15
  -3   5  -5 221906. 8563.15  15
   3  -5   6 5036.62 280.244  35
   3  -5   7 24112.2 1039.06  35
   3  -5   8 5867.16 612.399  33
   3  -5   8 4994.38 312.193  35
  -3   5  -9 69375.1 2762.64  11
   3  -5   9 68636.8 2794.88  35
  -3   5  -9 71874.1 2760.55  38
   3  -5   9 66804.2 3521.49  31
   3  -5   9 71619.8 3342.80  33
   3  -5  10 1562.80 171.077  35
  -3   5 -10 1698.90 149.343  38
   3  -5  10 1411.70 400.411  31
   3  -5  10 1516.55 330.126  33
   3  -5  10 1145.00 329.305  23
   3  -5  11 33275.8 1485.09  35
   3  -5  11 40266.6 3428.39   6
   3  -5  11 31964.5 2190.17  31
   3  -5  11 33742.0 2005.06  33
   3  -5  11 40133.8 2179.35  22
   3  -5  11 30686.6 2026.15  23
   3  -5  12 3107.52 268.548  35
   3  -5  12 2650.81 903.407   6
   3  -5  12 2960.99 504.274  33
   3  -5  12 3580.32 633.764  31
   3  -5  12 1823.85 419.518  24
   3  -5  12 2971.12 530.332  22
   3  -5  12 2761.94 507.315  23
   3  -5  13 12973.1 1940.40   6
   3  -5  13 9804.56 977.547  33
   3  -5  13 11432.2 1187.41  31
   3  -5  13 9105.52 928.389  24
   3  -5  13 11581.6 1095.91  22
   3  -5  13 9362.65 1108.92  27
   3  -5  13 10212.4 1045.47  23
   3  -5  13 9799.58 591.991  35
   3  -5  14 32358.5 3201.88   6
   3  -5  14 32639.7 2268.19  31
   3  -5  14 33675.4 2010.55  24
   3  -5  14 28432.5 2191.17  27
   3  -5  14 34985.4 2200.74  22
   3  -5  14 30658.4 2090.65  23
   3  -5  15 2326.42 573.414  31
   3  -5  15 2174.79 503.939  23
   3  -5  15 2850.63 580.004  22
   3  -5  15 2927.87 604.484  27
   3  -5  15 2778.31 489.526  24
   3  -5  16 15348.1 1448.29  31
   3  -5  16 13546.8 1279.55  23
   3  -5  16 16231.3 1458.58  27
   3  -5  17 2322.16 597.584  30
   3  -5  17 1608.00 477.278  31
   3  -5  17 1301.39 411.435  23
   3  -5  17 1471.24 442.828  27
   3  -5  18 22132.9 1819.46  30
   3  -5  18 21293.1 1728.13  31
   3  -5  18 22032.0 1650.15  27
   3  -5  18 20435.2 1558.90  23
   3  -5  19 2233.73 527.550  31
   3  -5  19 2220.05 425.752  28
   3  -5  19 2949.69 602.926  30
   3  -5  19 2257.39 469.478  34
   3  -5  20 4013.76 578.921  34
   3  -5  20 4954.54 717.731  30
   3  -5  21 18443.4 1307.31  34
   3  -5  21 24543.8 1527.51  30
   3  -5  22 879.583 213.078  34
  -3   4  20 22803.2 1290.73  37
  -3   4  20 23246.0 1490.89  21
  -3   4  19 11705.7 900.205  37
  -3   4  19 12858.3 1129.60  21
  -3   4  18 29521.2 2007.95  21
  -3   4  17 6040.95 694.271  36
  -3   4  17 6271.86 898.220  21
  -3   4  17 8185.50 969.603  25
  -3   4  16 29254.4 1868.09  36
  -3   4  16 31652.8 2243.66  21
  -3   4  16 29361.0 2230.90  14
  -3   4  16 27655.5 2092.41  20
  -3   4  16 36280.3 2024.75  25
  -3   4  15 8686.79 865.114  36
  -3   4  15 8024.34 1058.37  21
  -3   4  15 8488.96 1046.76  20
  -3   4  15 9024.27 1164.92  14
  -3   4  15 8977.04 909.179  25
  -3   4  14 58321.5 3034.05  36
  -3   4  14 55651.8 3406.31  21
  -3   4  14 53966.3 3328.26  20
  -3   4  14 65691.9 3142.78  25
  -3   4  13 8258.42 852.634  36
  -3   4  13 8695.31 952.194  16
  -3   4  13 9339.42 1089.56  20
  -3   4  13 8779.62 868.472  25
  -3   4  12 45024.0 2485.48  36
  -3   4  12 46732.2 2640.63  16
  -3   4  12 43423.9 2768.33  20
  -3   4  12 49459.7 2546.73  25
  -3   4  11 2140.22 400.416  36
  -3   4  11 2458.80 477.232  16
  -3   4  11 2785.75 557.115  20
  -3   4  11 2475.66 427.654  25
  -3   4  10 28956.8 1760.46  36
  -3   4  10 30688.3 1907.87  16
  -3   4  10 33415.6 1830.29  25
  -3   4   9 31602.3 1924.56  16
  -3   4   9 33990.2 1831.74  25
  -3   4   8 2420.54 165.237  38
  -3   4   8 2143.24 173.035  11
  -3   4   8 1874.44 369.156  16
  -3   4   7 12748.8 605.099  11
  -3   4   6 706.412 101.160  11
  -3   4   6 753.155 127.072  15
   3  -4  -4 17128.2 745.150  32
   3  -4  -3 3956.09 227.906  32
  -3   4   3 3743.13 261.293  15
   3  -4  -2 10454.8 488.994  32
  -3   4   2 10954.1 533.847  15
   3  -4  -1 30311.1 1249.66  32
  -3   4   1 30769.5 1290.98  15
   3  -4   0 1310.46 112.978  32
  -3   4   0 1384.43 137.028  15
   3  -4   1 81292.6 3196.06  32
  -3   4  -1 82046.3 3225.05  15
  -3   4  -2 110685. 4323.09  15
   3  -4   3 122634. 4790.27  32
  -3   4  -3 123995. 4797.30  15
   3  -4   4 11664.6 516.335  32
  -3   4  -4 12233.3 516.728  15
   3  -4   5 57136.6 2342.15  35
   3  -4   5 62205.9 2359.87  32
   3  -4   6 1350.98 126.820  35
   3  -4   6 1792.98 134.591  32
   3  -4   7 84618.3 3359.76  35
   3  -4   7 85895.0 3770.36  33
   3  -4   8 40296.5 1720.26  35
  -3   4  -8 42448.6 1690.08  11
   3  -4   8 41259.2 2125.03  33
   3  -4   9 41249.4 1748.90  35
   3  -4   9 40713.1 2178.26  33
  -3   4  -9 42071.5 1694.15  11
   3  -4  10 21583.8 989.379  35
   3  -4  10 25330.1 2566.28   6
   3  -4  10 21541.6 1595.31  31
   3  -4  10 22475.2 1419.09  33
   3  -4  10 17775.3 1384.12  23
   3  -4  11 30437.7 1363.29  35
   3  -4  11 30623.7 2959.91   6
   3  -4  11 30699.4 1840.03  33
   3  -4  11 30259.0 2029.75  31
   3  -4  11 32811.9 1973.49  22
   3  -4  11 27731.9 1849.04  23
   3  -4  12 20605.9 973.457  35
   3  -4  12 19679.5 1415.39  33
   3  -4  12 20348.9 1629.09  31
   3  -4  12 17144.1 1379.43  24
   3  -4  12 16194.6 1511.39  27
   3  -4  12 21526.5 1531.79  22
   3  -4  12 17702.4 1420.77  23
   3  -4  12 24192.3 2604.31   6
   3  -4  13 26909.9 2833.27   6
   3  -4  13 22967.6 1805.17  31
   3  -4  13 26508.3 1789.76  22
   3  -4  13 22031.9 1616.85  24
   3  -4  13 22667.7 1814.80  27
   3  -4  13 21249.0 1641.17  23
   3  -4  14 2846.65 616.792  31
   3  -4  14 2535.14 524.524  23
   3  -4  14 3900.04 647.509  22
   3  -4  14 3600.74 691.266  27
   3  -4  14 4286.45 624.611  24
   3  -4  15 31587.0 2274.74  31
   3  -4  15 36219.5 2259.94  22
   3  -4  15 33602.2 2077.69  24
   3  -4  15 28999.0 2085.52  23
   3  -4  15 32252.8 2299.97  27
   3  -4  16 46.6330 201.658  23
   3  -4  16 147.989 243.213  22
   3  -4  16 56.1816 203.266  27
   3  -4  17 45849.5 2717.24  27
   3  -4  17 41143.2 2794.79  30
   3  -4  17 37412.1 2257.13  29
   3  -4  18 143.143 184.716  34
   3  -4  18 421.859 308.437  30
   3  -4  19 15115.1 1410.92  31
   3  -4  19 15765.5 1273.73  28
   3  -4  19 13579.5 1242.00  34
   3  -4  19 15875.2 1467.28  30
   3  -4  19 16127.8 1320.57  23
   3  -4  20 6761.53 855.915  30
   3  -4  20 6387.33 755.145  34
   3  -4  20 6380.74 845.719  31
   3  -4  20 7653.71 765.108  28
   3  -4  20 8050.62 839.670  23
   3  -4  21 1419.68 372.605  30
   3  -4  21 1274.55 303.488  34
   3  -4  22 156.044 122.068  34
  -3   3  21 4336.61 450.711  37
  -3   3  21 4484.37 584.894  21
  -3   3  20 7139.68 661.816  37
  -3   3  20 6590.26 799.279  21
  -3   3  19 1262.48 293.452  37
  -3   3  19 1196.60 409.845  21
  -3   3  19 701.118 346.560  20
  -3   3  18 13066.8 1298.47  21
  -3   3  18 10628.3 1192.76  20
  -3   3  18 14148.6 1269.56  25
  -3   3  17 18221.2 1344.33  36
  -3   3  17 15412.3 1556.83  20
  -3   3  17 18030.6 1635.06  14
  -3   3  17 19788.3 1661.33  21
  -3   3  17 20589.3 1500.68  25
  -3   3  16 43285.0 2519.81  36
  -3   3  16 40928.8 2863.17  20
  -3   3  16 49103.8 2976.07  21
  -3   3  16 49841.5 3079.70  14
  -3   3  16 47947.6 2607.37  25
  -3   3  15 6007.12 710.071  36
  -3   3  15 5894.99 900.501  21
  -3   3  15 6316.73 944.678  20
  -3   3  15 5490.63 923.798  14
  -3   3  15 6576.78 770.843  25
  -3   3  15 4506.77 646.153  22
  -3   3  14 31188.1 1970.58  36
  -3   3  14 36792.1 2405.96  21
  -3   3  14 33560.7 2356.71  20
  -3   3  14 37783.9 2231.97  16
  -3   3  14 38426.3 2114.38  25
  -3   3  13 13237.2 1074.23  36
  -3   3  13 14050.3 1366.00  20
  -3   3  13 15105.9 1161.08  25
  -3   3  13 11319.8 1068.21  22
  -3   3  12 100171. 4433.51  36
  -3   3  12 110873. 4980.57  20
  -3   3  12 105004. 4502.49  25
  -3   3  11 4336.69 535.622  36
  -3   3  11 4100.04 537.307  25
  -3   3  11 4574.03 616.491  16
  -3   3  11 4545.56 722.560  20
  -3   3  10 133992. 5600.81  25
  -3   3  10 122821. 5653.25  16
  -3   3   9 49249.3 1963.20  11
  -3   3   8 70082.6 2767.81  11
  -3   3   7 53661.6 2136.55  11
   3  -3  -7 53122.3 2105.53  32
  -3   3   6 1127.74 116.294  11
   3  -3  -6 1187.93 98.0365  32
  -3   3   5 30500.4 1252.40  11
   3  -3  -5 29724.8 1219.18  32
  -3   3   4 3932.64 240.239  11
   3  -3  -4 3961.90 217.207  32
   3  -3  -3 606.622 69.4036  32
  -3   3   3 491.341 93.6538  15
   3  -3  -2 2670.01 165.555  32
  -3   3   2 2635.53 190.045  15
   3  -3  -1 226146. 8198.46  32
  -3   3   1 198012. 8209.37  15
   3  -3   0 5327.72 271.607  32
  -3   3   0 5082.26 282.647  15
   3  -3   1 3164.54 184.695  32
  -3   3  -1 2980.52 192.402  15
   3  -3   3 18401.0 779.120  32
   3  -3   4 28572.3 1163.86  32
   3  -3   5 8679.12 437.326  35
  -3   3  -5 9805.55 446.138  11
   3  -3   5 9730.49 430.235  32
   3  -3   6 164267. 6511.66  35
  -3   3  -6 173808. 6499.15  11
   3  -3   6 166266. 6478.89  32
   3  -3   7 17975.3 846.139  35
  -3   3  -7 20069.7 819.542  11
   3  -3   7 18898.9 798.647  32
   3  -3   8 101583. 4042.07  35
  -3   3  -8 105878. 3982.33  11
   3  -3   8 99351.5 3962.86  32
   3  -3   9 117.365 69.5609  35
  -3   3  -9 152.401 49.9277  11
   3  -3   9 100.268 108.511  33
   3  -3  10 120357. 5475.65  33
   3  -3  10 128045. 5014.97  35
   3  -3  11 1471.77 554.701  20
   3  -3  11 1406.66 700.193   6
   3  -3  11 1341.71 381.769  31
   3  -3  11 1241.18 303.580  33
   3  -3  11 1310.56 338.742  23
   3  -3  11 1289.17 339.187  22
   3  -3  11 967.567 312.979  24
   3  -3  11 1071.80 363.422  27
   3  -3  12 102038. 6152.75   6
   3  -3  12 94354.5 4758.62  20
   3  -3  12 83649.4 4286.51  17
   3  -3  12 88270.5 4466.81  31
   3  -3  12 93206.5 4575.47  27
   3  -3  12 82860.2 4259.78  24
   3  -3  12 84998.5 4238.41  26
   3  -3  12 86331.9 4255.06  23
   3  -3  12 100571. 4439.86  22
   3  -3  13 31715.4 1991.30  37
   3  -3  13 34846.5 2537.65  20
   3  -3  13 33190.9 2110.19  17
   3  -3  13 38019.8 2425.90  27
   3  -3  13 33988.7 2143.29  24
   3  -3  13 37479.9 2243.86  22
   3  -3  13 33605.7 2111.93  26
   3  -3  13 33491.4 2129.85  23
   3  -3  14 25943.7 1736.33  37
   3  -3  14 26532.5 2250.02  20
   3  -3  14 25388.8 1775.67  26
   3  -3  14 28288.7 1930.45  22
   3  -3  14 26333.9 1835.82  24
   3  -3  14 27995.0 2056.08  27
   3  -3  15 29119.2 1992.41  22
   3  -3  15 30181.6 1951.08  24
   3  -3  15 24780.8 1792.89  26
   3  -3  15 27633.0 2081.83  27
   3  -3  15 25800.0 1773.28  37
   3  -3  16 21440.1 1573.36  37
   3  -3  16 24619.0 1867.83  27
   3  -3  16 21058.5 1885.64  30
   3  -3  16 22432.0 1871.17  31
   3  -3  16 23240.7 1746.52  22
   3  -3  16 18491.3 1498.29  26
   3  -3  17 2049.42 472.641  34
   3  -3  17 1421.31 455.083  31
   3  -3  17 1622.31 521.074  30
   3  -3  17 1351.28 381.557  29
   3  -3  17 1767.64 464.420  23
   3  -3  17 2049.44 528.632  22
   3  -3  17 1466.47 376.657  26
   3  -3  18 8630.95 963.829  28
   3  -3  18 7992.74 936.194  34
   3  -3  18 7431.52 822.363  29
   3  -3  18 8705.44 1116.23  30
   3  -3  18 7706.14 1016.92  31
   3  -3  18 8130.98 952.459  23
   3  -3  19 81.9043 194.002  28
   3  -3  19 162.482 160.241  29
   3  -3  19 55.1203 213.199  30
   3  -3  19 43.2619 167.344  34
   3  -3  19 51.2308 221.542  31
   3  -3  19 86.3257 177.085  23
   3  -3  20 2279.11 453.105  34
   3  -3  20 3276.69 593.321  31
   3  -3  20 3896.80 647.031  30
   3  -3  20 4047.90 566.215  28
   3  -3  21 407.322 237.655  30
   3  -3  21 180.879 137.011  34
  -3   2  22 1221.81 327.727  21
  -3   2  21 73.5281 194.756  21
  -3   2  21 199.026 210.856  20
  -3   2  20 357.207 286.585  21
  -3   2  20 247.246 253.239  20
  -3   2  19 358.350 320.915  21
  -3   2  19 170.722 280.719  20
  -3   2  18 1507.15 485.492  21
  -3   2  18 1122.15 461.955  20
  -3   2  18 1290.24 766.115  25
  -3   2  18 1488.92 467.684  14
  -3   2  17 3318.92 677.590  21
  -3   2  17 2868.78 672.717  20
  -3   2  17 4008.51 758.680  25
  -3   2  17 3029.71 559.574  22
  -3   2  17 3359.69 689.826  14
  -3   2  16 175.754 265.721  21
  -3   2  16 193.569 279.033  20
  -3   2  16-39.4919 328.498  25
  -3   2  16 134.441 203.285  22
  -3   2  16 192.601 328.492  14
  -3   2  15 5498.11 709.480  25
  -3   2  15 5023.71 724.537  22
  -3   2  15 5070.43 818.291  21
  -3   2  15 5675.88 919.045  20
  -3   2  15 7362.95 1036.37  14
  -3   2  14 6528.83 901.961  21
  -3   2  14 6356.30 931.386  20
  -3   2  14 4764.28 706.575  22
  -3   2  14 6276.77 729.399  25
  -3   2  14 6670.64 969.531  14
  -3   2  13 144536. 6369.23  20
  -3   2  13 125561. 6120.75  21
  -3   2  13 143150. 5871.42  25
  -3   2  13 114474. 5842.75  22
  -3   2  12 8077.88 839.359  16
  -3   2  12 6658.77 854.883  21
  -3   2  12 7454.78 939.162  20
  -3   2  12 5899.12 739.928  22
  -3   2  12 7488.70 910.105  26
  -3   2  12 7281.76 736.955  25
  -3   2  11 238033. 9881.81  26
  -3   2  11 241110. 9663.48  25
  -3   2  11 231799. 9146.21  35
  -3   2  10 991.328 136.025  35
  -3   2   9 123042. 4727.25  11
  -3   2   9 120389. 4815.79  35
  -3   2   8 930.561 120.889  35
   3  -2  -8 1039.79 81.6878  32
  -3   2   8 1192.95 100.651  11
  -3   2   7 103413. 4155.97  35
  -3   2   7 100608. 4063.90   2
  -3   2   7 113478. 4128.97  11
   3  -2  -7 117486. 4108.41  32
  -3   2   6 2271.09 169.587  35
  -3   2   6 2418.19 167.899  11
  -3   2   5 91261.8 3599.87   2
  -3   2   5 93961.3 3630.73  11
  -3   2   4 45467.1 1685.34  11
   3  -2  -4 46341.9 1663.58  32
  -3   2   3 84206.6 2826.52  11
   3  -2  -3 82808.6 2798.58  32
   3  -2  -2 1921.64 124.138  32
   3  -2  -1 52995.6 2080.37  32
  -3   2   0 17760.1 753.581  11
   3  -2   0 17693.2 734.156  32
  -3   2  -1 2214.17 149.571  11
  -3   2  -2 125755. 4784.88  11
   3  -2   2 121670. 4765.86  32
  -3   2  -3 67562.9 2698.23  11
   3  -2   3 69722.8 2684.38  32
  -3   2  -4 76529.9 2977.94  11
   3  -2   4 75633.7 2961.42  32
  -3   2  -5 61973.8 2603.69  11
   3  -2   5 71229.7 2610.62  32
  -3   2  -6 94.7566 43.4801  11
   3  -2   6 48.4773 36.6791  32
  -3   2  -7 71505.1 2779.54  11
   3  -2   7 70463.8 2762.63  32
  -3   2  -8 10072.5 454.934  11
   3  -2   8 10129.6 439.399  32
   3  -2   9 129193. 5688.84  33
   3  -2   9 135274. 5175.77  32
   3  -2   9 130579. 5710.41  37
   3  -2  10 31984.0 1790.76  37
   3  -2  11 53862.2 4054.20   6
  -3   2 -11 52244.5 2006.48   2
   3  -2  11 48484.6 2506.38  37
   3  -2  11 43309.2 2763.68  30
   3  -2  11 50553.8 2696.46  22
   3  -2  11 43872.0 2646.33  26
   3  -2  11 40617.2 2566.78  24
   3  -2  11 44394.3 2578.41  23
   3  -2  12 70001.7 3357.85  37
   3  -2  12 69428.0 3575.85  17
   3  -2  12 64774.7 3722.68  30
   3  -2  12 78124.7 3802.96  31
   3  -2  12 69787.6 3545.18  24
   3  -2  12 77786.8 3624.80  22
   3  -2  12 67514.7 3558.44  26
   3  -2  12 59563.3 3239.89  25
   3  -2  13 40352.1 2184.13  37
   3  -2  13 38231.1 2305.21  17
   3  -2  13 37514.2 2436.37  31
   3  -2  13 37922.9 2332.70  26
   3  -2  13 38019.1 2320.05  22
   3  -2  13 32321.9 2036.46  25
   3  -2  13 38478.8 2320.29  24
   3  -2  14 61996.2 3216.08  37
   3  -2  14 63755.5 3845.69  20
   3  -2  14 67205.4 3404.06  17
   3  -2  14 67425.2 3660.16  27
   3  -2  14 65587.3 3620.22  31
   3  -2  14 70736.2 3515.60  24
   3  -2  14 66853.8 3483.30  22
   3  -2  14 63831.8 3442.66  26
   3  -2  14 54482.9 3101.14  25
   3  -2  15 25187.9 1821.36  34
   3  -2  15 22636.0 1614.83  37
   3  -2  15 25938.8 2232.29  20
   3  -2  15 25670.3 1719.76  17
   3  -2  15 23781.6 1775.42  26
   3  -2  15 25528.7 1815.31  24
   3  -2  15 24097.6 1797.24  23
   3  -2  15 19514.3 1494.74  25
   3  -2  15 27228.6 1878.66  22
   3  -2  15 28337.1 2037.52  27
   3  -2  15 25601.3 1961.90  31
   3  -2  16 9650.04 975.718  37
   3  -2  16 12797.8 1215.05  23
   3  -2  16 11174.8 1149.06  22
   3  -2  16 9309.60 1045.85  26
   3  -2  16 9244.37 904.342  25
   3  -2  16 10723.8 1106.45  34
   3  -2  16 12545.1 1371.59  30
   3  -2  16 11195.9 1235.52  31
   3  -2  17 4163.30 624.617  37
   3  -2  17 4218.39 672.100  26
   3  -2  17 4484.34 707.644  23
   3  -2  17 4183.03 563.536  25
   3  -2  17 4749.69 716.046  34
   3  -2  17 4209.72 692.371  28
   3  -2  17 6115.44 935.578  30
   3  -2  17 3955.74 630.305  29
   3  -2  17 5319.40 844.779  31
   3  -2  18 2271.42 459.210  37
   3  -2  18 3255.85 567.051  26
   3  -2  18 3304.72 684.953  30
   3  -2  18 3249.83 586.904  34
   3  -2  18 3349.97 663.142  31
   3  -2  18 3183.92 546.178  29
   3  -2  18 3902.75 634.496  28
   3  -2  19 149.264 184.366  26
   3  -2  19 547.285 308.780  30
   3  -2  19 212.137 181.290  29
   3  -2  19 503.705 229.897  34
   3  -2  19 461.709 250.459  28
   3  -2  20 3327.03 588.725  30
   3  -2  20 3616.42 544.462  28
   3  -2  20 2788.99 484.935  34
   3  -2  20 3346.44 481.343  29
   3  -2  21 215.681 156.615  28
  -3   1  23 659.800 546.242  21
  -3   1  23 525.278 219.422  20
  -3   1  22 6237.32 578.065  37
  -3   1  22 5597.72 735.955  20
  -3   1  22 6027.42 743.027  21
  -3   1  21 110.998 125.898  37
  -3   1  21 41.7952 228.624  21
  -3   1  21 146.074 230.662  20
  -3   1  20 6373.25 703.092  37
  -3   1  20 5927.66 829.200  21
  -3   1  20 4930.97 848.756  20
  -3   1  20 6042.35 731.924  22
  -3   1  19 1363.38 345.677  37
  -3   1  19 1470.46 485.412  21
  -3   1  19 1142.70 470.352  20
  -3   1  19 1222.13 381.043  22
  -3   1  19 1760.77 488.250  14
  -3   1  18 4447.94 775.209  21
  -3   1  18 4697.90 799.682  14
  -3   1  18 5186.77 980.959  25
  -3   1  18 3611.11 647.719  22
  -3   1  17 8397.72 1096.75  14
  -3   1  17 5815.44 898.111  21
  -3   1  17 6983.16 990.770  25
  -3   1  17 6204.78 863.996  22
  -3   1  16 387.244 205.311  36
  -3   1  16 115.409 249.704  21
  -3   1  16 255.753 349.842  14
  -3   1  16 353.139 419.147  25
  -3   1  16 198.651 225.436  22
  -3   1  15 736.328 263.300  36
  -3   1  15 990.946 178.207  35
  -3   1  15 629.015 376.103  14
  -3   1  15 338.652 259.003  25
  -3   1  15 578.757 310.775  22
  -3   1  14 47104.8 2590.83  36
  -3   1  14 52341.7 2148.10  35
  -3   1  14 49880.0 3111.76  14
  -3   1  14 45330.3 2864.97  21
  -3   1  14 42375.9 2728.65  22
  -3   1  14 47800.2 2616.60  25
  -3   1  13 21070.9 1765.92  14
  -3   1  13 20438.6 1383.45  36
  -3   1  13 22111.0 1025.34  35
  -3   1  13 18084.8 1540.23  21
  -3   1  13 17827.7 1443.04  34
  -3   1  13 17151.8 1461.10  22
  -3   1  13 21533.4 1426.62  25
  -3   1  12 7008.95 920.646  14
  -3   1  12 7124.18 439.230  35
  -3   1  12 4813.92 587.509  36
  -3   1  12 4966.16 712.098  21
  -3   1  12 6219.38 728.548  34
  -3   1  12 7153.76 838.698  26
  -3   1  12 4824.42 682.689  22
  -3   1  12 6371.75 668.739  25
  -3   1  11 424.891 205.533  34
  -3   1  11 530.338 186.767  36
  -3   1  11 440.954 107.057  35
  -3   1  10 54733.5 3012.45  34
  -3   1  10 60191.4 2942.79  36
  -3   1   9 31856.7 1258.44  11
  -3   1   9 30010.3 1334.61  35
  -3   1   8 88527.4 3544.74  11
  -3   1   8 82482.0 3595.32  35
   3  -1  -7 7993.24 351.394  32
  -3   1   7 7951.08 363.735  11
  -3   1   7 7073.70 385.085  35
  -3   1   6 144109. 5288.61   2
   3  -1  -6 138203. 5294.45  32
  -3   1   6 141548. 5313.16  11
  -3   1   5 26323.2 988.890   2
   3  -1  -5 23735.0 983.931  32
  -3   1   5 25604.2 1005.00  11
  -3   1   4 306019. 11118.8   2
   3  -1  -4 285324. 11110.6  32
  -3   1   4 304219. 11129.3  11
  -3   1   4 272503. 11103.8  35
  -3   1   3 67164.3 2650.65  11
  -3   1   3 68061.1 2646.32   2
  -3   1   2 472189. 18060.8   2
  -3   1   1 4694.25 243.109  11
  -3   1   0 96570.6 3750.14  11
  -3   1  -1 869.672 83.7185  11
  -3   1  -2 139925. 5403.24  11
  -3   1  -3 12335.7 534.224  11
   3  -1   3 12010.6 518.425  32
  -3   1  -4 13848.4 577.594  11
   3  -1   4 12785.3 556.145  32
  -3   1  -5 332.253 58.6463  11
   3  -1   5 301.943 43.5577  32
  -3   1  -6 134716. 5064.27  11
   3  -1   6 128277. 5044.53  32
  -3   1  -7 16775.4 713.359  11
   3  -1   7 17106.7 699.692  32
  -3   1  -8 46076.0 1936.23   2
   3  -1   8 48708.7 1877.37  32
   3  -1   9 100364. 4836.54  37
  -3   1  -9 116597. 4448.06   2
   3  -1  10 12039.6 946.391  37
  -3   1 -10 13373.6 615.897   2
   3  -1  11 57325.4 2696.48  37
   3  -1  11 56479.0 2976.48  17
   3  -1  11 51622.8 3082.32  20
   3  -1  11 52870.5 3027.35  30
   3  -1  11 59841.8 3060.63  31
   3  -1  11 50626.1 2911.22  26
   3  -1  11 55051.5 2959.18  27
   3  -1  12 17063.5 1231.87  37
   3  -1  12 18686.4 1615.55  20
   3  -1  12 20599.3 1524.51  17
   3  -1  12 17776.3 1471.82  27
   3  -1  12 17710.1 1490.21  31
   3  -1  12 17564.8 1468.19  26
   3  -1  12 18800.1 1446.57  23
   3  -1  12 16041.9 1271.78  25
   3  -1  13 69906.7 3498.93  34
   3  -1  13 64508.0 3257.15  37
   3  -1  13 64278.4 3773.75  20
   3  -1  13 71157.4 3567.73  17
   3  -1  13 69636.5 3678.11  31
   3  -1  13 72723.9 3595.14  24
   3  -1  13 63225.2 3538.18  26
   3  -1  13 69366.3 3547.51  23
   3  -1  13 55235.8 3246.88  25
   3  -1  14 10359.5 950.317  37
   3  -1  14 11811.3 1339.21  20
   3  -1  14 9342.63 1021.28  17
   3  -1  14 9911.41 1041.12  34
   3  -1  14 11791.7 1212.68  31
   3  -1  14 10645.4 1130.32  26
   3  -1  14 10537.1 1092.50  23
   3  -1  14 12456.1 1177.79  24
   3  -1  14 8597.57 935.067  25
   3  -1  15 6559.14 745.454  37
   3  -1  15 7685.34 1191.93  20
   3  -1  15 5948.55 857.159  26
   3  -1  15 6982.14 886.900  23
   3  -1  15 5730.02 741.460  25
   3  -1  15 6546.80 835.046  34
   3  -1  15 7079.70 1037.35  30
   3  -1  15 6514.45 916.237  31
   3  -1  16 6419.69 754.465  37
   3  -1  16 7667.73 948.839  26
   3  -1  16 5813.33 742.925  25
   3  -1  16 8093.62 974.920  28
   3  -1  16 7525.74 897.672  34
   3  -1  16 7779.73 1077.46  30
   3  -1  16 6596.88 839.301  29
   3  -1  16 7037.49 954.608  31
   3  -1  17 25476.0 1718.52  37
   3  -1  17 27166.7 1951.43  26
   3  -1  17 26806.3 1764.39  25
   3  -1  17 25168.6 1862.04  34
   3  -1  17 28697.7 2194.68  30
   3  -1  17 29993.8 1933.71  29
   3  -1  17 29608.1 2094.61  31
   3  -1  17 26967.2 1962.34  28
   3  -1  18 787.127 280.055  37
   3  -1  18 1302.68 325.709  25
   3  -1  18 1229.33 386.098  26
   3  -1  18 1439.28 486.959  30
   3  -1  18 1312.27 390.780  29
   3  -1  18 797.096 299.637  34
   3  -1  18 1546.69 427.201  28
   3  -1  19 7644.02 783.473  37
   3  -1  19 7160.21 837.661  26
   3  -1  19 8686.09 914.438  28
   3  -1  19 7732.03 977.225  30
   3  -1  19 7202.28 800.702  29
   3  -1  20 1400.90 345.313  26
   3  -1  20 1332.88 347.394  28
   3  -1  20 1398.71 320.962  29
   3  -1  21 2144.98 344.195  29
  -3   0  23 6366.76 936.369  21
  -3   0  22 5846.50 563.569  37
  -3   0  22 7433.53 952.835  21
  -3   0  22 5345.19 628.056  22
  -3   0  21 10003.9 845.331  37
  -3   0  21 9633.05 1041.06  21
  -3   0  21 7947.83 1012.71  20
  -3   0  21 9595.49 950.090  22
  -3   0  20 729.398 248.972  37
  -3   0  20 568.857 367.879  21
  -3   0  20 174.867 287.945  20
  -3   0  20 398.265 277.879  22
  -3   0  19 8137.61 847.394  37
  -3   0  19 8824.76 1071.75  21
  -3   0  19 8323.17 1117.08  20
  -3   0  19 8606.21 1001.47  22
  -3   0  18 306.871 203.487  37
  -3   0  18 526.545 348.900  21
  -3   0  18 524.022 390.586  20
  -3   0  18 364.912 362.682  14
  -3   0  18 157.258 215.356  22
  -3   0  17 29006.4 1386.10  35
  -3   0  17 25721.1 2051.96  21
  -3   0  17 30957.8 2270.49  14
  -3   0  17 26186.6 2161.06  20
  -3   0  17 24562.7 1961.18  22
  -3   0  16 23001.8 1610.25  36
  -3   0  16 25726.4 1241.09  35
  -3   0  16 24568.4 2035.14  19
  -3   0  16 24173.0 1911.67  21
  -3   0  16 25996.6 2047.79  20
  -3   0  16 25512.7 2059.95  14
  -3   0  16 22088.8 1746.69  34
  -3   0  16 24040.5 1875.08  22
  -3   0  15 17392.7 896.264  35
  -3   0  15 17025.1 1252.08  36
  -3   0  15 15206.8 1442.83  21
  -3   0  15 18835.1 1658.10  14
  -3   0  15 16887.9 1555.63  20
  -3   0  15 12294.7 1222.28  31
  -3   0  15 16171.5 1358.30  34
  -3   0  15 12846.8 1328.28  22
  -3   0  14 350.674 309.539  14
  -3   0  14 287.517 163.495  36
  -3   0  14 35.5034 87.2422  35
  -3   0  14 249.807 246.346  21
  -3   0  14 107.776 255.281  20
  -3   0  14 41.5875 150.507  34
  -3   0  14 126.026 181.690  31
  -3   0  14 141.939 194.124  22
  -3   0  13 7284.67 704.968  36
  -3   0  13 7995.83 490.259  35
  -3   0  13 7687.07 971.838  14
  -3   0  13 6574.20 843.274  21
  -3   0  13 8293.07 965.361  20
  -3   0  13 6150.67 744.221  34
  -3   0  13 5206.92 722.449  31
  -3   0  13 6195.90 810.476  22
  -3   0  12 3117.81 604.800  14
  -3   0  12 1891.68 338.279  36
  -3   0  12 2285.60 227.887  35
  -3   0  12 2149.51 466.166  21
  -3   0  12 2066.12 457.146  22
  -3   0  12 2522.47 509.022  20
  -3   0  12 1573.74 352.601  25
  -3   0  12 1891.38 378.095  34
  -3   0  11 44303.5 2646.60  34
  -3   0  11 49913.4 2579.41  36
  -3   0  10 874.828 127.113  35
   3   0  -9 18151.7 744.427  32
  -3   0   9 18214.6 826.349  35
  -3   0   8 441.203 85.1126  35
  -3   0   8 420.596 56.0664   2
  -3   0   7 110709. 4508.23  35
  -3   0   7 119242. 4476.67   2
  -3   0   7 115400. 4482.12  11
  -3   0   6 95208.5 3863.01  35
  -3   0   6 99743.1 3849.91  11
  -3   0   6 101397. 3844.09   2
  -3   0   5 24827.5 1015.18  11
  -3   0   5 24614.3 1008.00   2
  -3   0   4 256645. 9624.80  11
  -3   0   4 245074. 9620.08   2
  -3   0   3 73346.5 2888.43  11
  -3   0   3 74489.7 2890.34   2
  -3   0   2 208223. 8008.89   2
  -3   0   1 50101.5 1976.85  11
  -3   0   0 185410. 7148.77  11
  -3   0   0 186274. 7154.55   2
  -3   0  -1 100391. 3908.15  11
  -3   0  -1 101044. 3916.34   2
  -3   0  -2 35234.5 1414.16  11
  -3   0  -2 35185.6 1427.49   2
  -3   0  -3 32019.0 1309.15  11
  -3   0  -3 33018.0 1326.62   2
  -3   0  -4 13013.4 570.052  11
  -3   0  -4 13058.2 585.487   2
  -3   0  -5 17154.2 725.696  11
  -3   0  -5 16938.5 746.848   2
  -3   0  -6 53720.8 2122.22  11
  -3   0  -6 53633.7 2151.41   2
   3   0   7 28469.2 1160.73  32
  -3   0  -7 30734.1 1222.95   2
   3   0   8 29729.1 1192.26  32
  -3   0  -8 31274.7 1261.53   2
  -3   0  -9 7934.80 402.784   2
   3   0   9 7759.47 726.744  34
   3   0   9 7668.22 670.428  37
   3   0  10 48601.6 2502.41  37
   3   0  10 50965.7 2922.75  30
   3   0  10 49741.7 2639.09  34
   3   0  10 52973.6 2848.27  27
   3   0  10 48544.7 2700.60  24
   3   0  10 55513.1 2817.37  22
   3   0  10 53490.9 2806.03  23
   3   0  11 14564.3 1069.44  37
   3   0  11 14133.9 1345.13  20
   3   0  11 16835.9 1361.43  17
   3   0  11 13586.7 1140.44  34
   3   0  11 13913.4 1328.64  30
   3   0  11 15457.5 1320.95  27
   3   0  11 14017.3 1281.08  31
   3   0  11 15949.3 1283.92  22
   3   0  11 15004.5 1228.50  24
   3   0  11 17214.3 1338.53  23
   3   0  12 81353.8 3821.03  37
   3   0  12 75140.8 4242.16  20
   3   0  12 89526.7 4252.64  17
   3   0  12 81216.6 4003.27  34
   3   0  12 85273.4 4258.52  31
   3   0  12 86002.3 4100.63  24
   3   0  12 88045.8 4169.22  22
   3   0  12 91691.7 4218.98  23
   3   0  13 912.548 280.116  37
   3   0  13 648.183 370.599  20
   3   0  13 1107.80 368.066  17
   3   0  13 644.714 289.671  34
   3   0  13 867.750 320.015  28
   3   0  13 678.719 320.844  31
   3   0  13 585.102 275.908  25
   3   0  13 1464.11 424.668  22
   3   0  13 1147.08 410.786  26
   3   0  14 42497.2 2374.56  37
   3   0  14 42560.5 2851.41  20
   3   0  14 42423.8 2627.44  28
   3   0  14 45435.2 2617.32  34
   3   0  14 45963.6 2770.87  31
   3   0  14 39462.5 2500.19  25
   3   0  14 47299.2 2802.85  26
   3   0  15 776.938 261.726  37
   3   0  15 1081.04 360.870  21
   3   0  15 759.519 750.075  20
   3   0  15 953.189 331.180  25
   3   0  15 861.736 383.808  26
   3   0  15 468.991 344.055  30
   3   0  15 612.665 296.788  34
   3   0  16 34096.7 2078.81  37
   3   0  16 40949.9 2525.27  26
   3   0  16 36824.3 2253.53  25
   3   0  16 33851.8 2260.71  34
   3   0  16 41294.0 2740.53  30
   3   0  17 135.489 173.350  37
   3   0  17 38.9924 168.657  25
   3   0  17 202.849 277.398  26
   3   0  17 252.513 299.047  30
   3   0  18 20030.9 1374.36  37
   3   0  18 21219.2 1638.14  26
   3   0  18 20786.1 1460.93  25
   3   0  18 21650.7 1627.41  28
   3   0  19 5033.09 591.551  37
   3   0  19 5957.31 751.398  26
   3   0  19 5096.80 602.709  25
   3   0  19 5497.47 693.559  29
   3   0  19 6396.57 760.449  28
   3   0  20 14640.3 1156.74  26
   3   0  20 15378.7 1110.71  29
   3   0  21 122.840 164.637  26
  -3  -1  23 8686.00 900.974  20
  -3  -1  23 10546.9 848.149  22
  -3  -1  22-431.618 952.285  21
  -3  -1  22 354.538 264.350  20
  -3  -1  22 272.896 219.033  22
  -3  -1  21 12924.9 968.805  37
  -3  -1  21 10133.0 1192.44  20
  -3  -1  21 14679.0 1462.66  21
  -3  -1  21 12846.4 1170.06  22
  -3  -1  20 62.9704 136.177  37
  -3  -1  20-159.260 453.320  21
  -3  -1  20 299.214 327.318  20
  -3  -1  20 143.599 244.911  22
  -3  -1  19 25759.7 1664.28  37
  -3  -1  19 26192.8 2013.66  21
  -3  -1  19 26265.1 2107.36  20
  -3  -1  19 25882.3 1968.89  22
  -3  -1  18 2646.50 597.387  31
  -3  -1  18 3762.51 628.931  34
  -3  -1  18 3895.46 564.269  37
  -3  -1  18 3814.82 364.423  35
  -3  -1  18 3598.48 712.175  21
  -3  -1  18 3830.64 783.938  20
  -3  -1  17 6287.48 878.027  31
  -3  -1  17 6201.25 835.279  34
  -3  -1  17 7081.76 775.282  37
  -3  -1  17 8175.74 567.752  35
  -3  -1  17 7821.04 1027.12  21
  -3  -1  17 7583.39 1072.12  20
  -3  -1  17 7344.31 1088.82  19
  -3  -1  16 10753.5 663.824  35
  -3  -1  16 9669.66 1279.34  19
  -3  -1  16 9389.50 1132.94  21
  -3  -1  16 8734.86 1148.17  20
  -3  -1  16 9933.45 1198.15  14
  -3  -1  16 8623.51 969.717  34
  -3  -1  16 8767.66 1044.73  31
  -3  -1  16 10557.7 1179.36  25
  -3  -1  15 6051.15 443.052  35
  -3  -1  15 4518.26 766.188  21
  -3  -1  15 5280.17 859.889  20
  -3  -1  15 5717.76 900.567  14
  -3  -1  15 5035.09 695.158  34
  -3  -1  15 3766.67 681.999  31
  -3  -1  15 5528.32 868.568  25
  -3  -1  14 58383.0 2952.23  36
  -3  -1  14 66978.5 2587.39  35
  -3  -1  14 52866.0 3264.82  21
  -3  -1  14 65254.4 3502.79  20
  -3  -1  14 62236.2 3548.91  14
  -3  -1  14 56541.3 3114.88  34
  -3  -1  14 47837.9 3161.32  31
  -3  -1  14 57269.8 3096.96  25
  -3  -1  13 20213.7 933.194  35
  -3  -1  13 16181.6 1162.52  36
  -3  -1  13 15875.1 1404.89  21
  -3  -1  13 20650.5 1577.04  20
  -3  -1  13 18030.5 1566.89  14
  -3  -1  13 16249.5 1265.15  34
  -3  -1  13 14177.4 1354.57  31
  -3  -1  13 16725.7 1304.84  25
  -3  -1  12 70582.2 3536.88  36
  -3  -1  12 84387.5 3256.22  35
  -3  -1  12 84418.7 4207.64  14
  -3  -1  12 73977.9 3925.98  21
  -3  -1  12 94999.3 4170.14  20
  -3  -1  12 76041.0 3719.90  25
  -3  -1  12 71055.2 3714.08  34
  -3  -1  11 23379.8 1522.97  34
  -3  -1  11 23970.2 1431.30  36
  -3  -1  10 92830.9 3705.85  35
  -3  -1   9 3321.29 240.855  35
  -3  -1   8 46558.4 1878.57  35
  -3  -1   8 45291.4 1842.55   2
  -3  -1   7 332320. 12760.1   2
  -3  -1   6 8613.75 418.298   2
   3   1  -5 213092. 8185.95  38
  -3  -1   5 211528. 8204.89  11
  -3  -1   5 214513. 8211.68   2
   3   1  -4 483.605 64.5285  38
  -3  -1   4 446.890 69.4388  11
  -3  -1   4 421.854 66.9198   2
   3   1  -3 382091. 14598.3  38
  -3  -1   3 380484. 14619.9   2
  -3  -1   2 176.140 48.9742  11
   3   1  -2 156.828 45.8691  38
   3   1  -1 43085.4 1695.95  38
  -3  -1   1 43212.0 1712.42  11
  -3  -1   1 41904.7 1710.03   2
  -3  -1   0 1249.18 98.2886  11
  -3  -1   0 61.4310 47.6435   2
   3   1   1 13574.7 577.113  38
  -3  -1  -1 13012.4 588.552  11
  -3  -1  -1 13317.6 593.988   2
   3   1   2 5916.00 292.878  38
  -3  -1  -2 6071.91 309.104  11
  -3  -1  -2 6084.63 312.661   2
   3   1   3 101362. 4012.02  38
  -3  -1  -3 106565. 4042.48   2
  -3  -1  -4 2152.53 160.399   2
  -3  -1  -5 13423.1 612.297   2
  -3  -1  -6 2734.20 190.909   2
  -3  -1  -7 34172.5 1411.22   2
   3   1   8 2227.25 320.548  37
   3   1   8 2225.93 162.864  15
  -3  -1  -8 2347.52 172.779   2
   3   1   9 32656.8 1702.62  37
   3   1   9 29227.9 1784.21  34
   3   1   9 34892.2 2151.95  30
   3   1   9 29347.6 1998.45  26
   3   1  10 5107.06 557.487  37
   3   1  10 7779.63 877.135  17
   3   1  10 5914.28 670.562  34
   3   1  10 5481.21 692.626  28
   3   1  10 5937.63 818.901  30
   3   1  10 5393.26 689.272  24
   3   1  10 4886.20 718.817  26
   3   1  11 16613.5 1160.54  37
   3   1  11 16775.3 1462.15  20
   3   1  11 20835.8 1573.42  17
   3   1  11 15791.4 1344.41  28
   3   1  11 16096.5 1287.36  34
   3   1  11 18097.2 1559.69  30
   3   1  11 17891.3 1478.38  26
   3   1  12 597.052 204.608  37
   3   1  12 206.062 203.694  21
   3   1  12 208.386 310.840  20
   3   1  12 450.106 254.170  28
   3   1  12 245.725 186.290  34
   3   1  12 748.445 295.269  25
   3   1  12 393.049 277.365  26
   3   1  13 10382.8 902.947  37
   3   1  13 10445.8 1070.43  21
   3   1  13 10169.9 1209.39  20
   3   1  13 9906.55 1013.80  34
   3   1  13 11006.8 1063.11  29
   3   1  13 11103.9 1111.12  28
   3   1  13 9629.71 1091.09  26
   3   1  13 9254.34 1033.12  25
   3   1  14 98.8989 135.315  37
   3   1  14 176.889 234.237  21
   3   1  14 234.382 271.979  25
   3   1  14 51.9351 265.751  26
   3   1  14 131.590 198.977  29
   3   1  14 197.011 213.020  28
   3   1  15 43411.5 2422.10  37
   3   1  15 47207.7 2835.43  26
   3   1  15 46340.6 2711.55  25
   3   1  15 45900.9 2739.29  28
   3   1  15 46641.4 2674.51  29
   3   1  16 805.668 254.943  37
   3   1  16 736.246 325.762  25
   3   1  16 773.165 323.116  29
   3   1  16 861.187 321.916  28
   3   1  17 43491.1 2416.42  37
   3   1  17 50281.3 2687.93  25
   3   1  17 50021.4 2713.00  29
   3   1  18 160.467 171.771  37
   3   1  18 307.645 224.344  25
   3   1  18 324.836 236.860  29
   3   1  19 28332.5 1617.44  37
   3   1  19 32576.7 1788.84  25
   3   1  20 11827.0 856.449  25
   3   1  21 15381.8 1022.68  26
  -3  -2  23 269.715 201.204  20
  -3  -2  22 2835.40 563.576  20
  -3  -2  21 4631.37 1331.58  21
  -3  -2  21 1826.43 501.190  20
  -3  -2  20 5551.99 1258.68  21
  -3  -2  20 4403.82 792.408  20
  -3  -2  20 4128.88 680.446  22
  -3  -2  19 493.501 198.257  37
  -3  -2  19-172.689 759.152  21
  -3  -2  19 125.715 285.364  20
  -3  -2  19 300.694 235.317  34
  -3  -2  19 454.002 284.700  31
  -3  -2  19 304.139 259.673  22
  -3  -2  18 9130.52 622.729  35
  -3  -2  18 8457.24 813.288  37
  -3  -2  18 7431.28 1082.32  21
  -3  -2  18 8693.34 1152.06  20
  -3  -2  18 8813.11 1224.42  19
  -3  -2  18 7516.00 1015.08  31
  -3  -2  18 8657.14 955.280  34
  -3  -2  18 9003.50 1060.62  22
  -3  -2  17 847.300 181.645  35
  -3  -2  17 1016.34 278.822  37
  -3  -2  17 1247.86 482.112  21
  -3  -2  17 1188.35 485.866  19
  -3  -2  17 1412.83 482.383  20
  -3  -2  17 1121.11 337.892  34
  -3  -2  17 1191.99 412.356  31
  -3  -2  17 640.633 328.554  22
  -3  -2  16 16394.6 859.381  35
  -3  -2  16 13819.1 1089.51  37
  -3  -2  16 12445.1 1579.70  19
  -3  -2  16 12957.1 1352.22  21
  -3  -2  16 13736.4 1462.69  20
  -3  -2  16 14224.3 1245.13  34
  -3  -2  16 11916.2 1316.00  31
  -3  -2  16 15034.3 1406.53  22
  -3  -2  15 3148.95 462.753  37
  -3  -2  15 3383.79 321.871  35
  -3  -2  15 3606.18 846.949  19
  -3  -2  15 3628.93 674.474  21
  -3  -2  15 3384.05 698.312  20
  -3  -2  15 2820.27 510.677  34
  -3  -2  15 3137.16 638.090  31
  -3  -2  15 2994.63 606.627  22
  -3  -2  15 2323.94 454.225  23
  -3  -2  14 46752.1 1901.44  35
  -3  -2  14 38895.6 2568.41  21
  -3  -2  14 47120.1 2779.69  20
  -3  -2  14 43057.1 2421.56  34
  -3  -2  14 37981.0 2601.90  31
  -3  -2  14 40481.5 2548.28  22
  -3  -2  14 33514.0 2271.19  23
  -3  -2  13 27551.3 1220.80  35
  -3  -2  13 26660.4 1684.23  34
  -3  -2  13 24285.7 1818.36  21
  -3  -2  13 29037.6 2058.31  14
  -3  -2  13 26852.3 1899.73  20
  -3  -2  13 21337.1 1791.35  31
  -3  -2  13 25787.5 1812.49  22
  -3  -2  13 20606.0 1573.28  23
  -3  -2  12 69302.5 2722.71  35
  -3  -2  12 56811.8 3345.82  21
  -3  -2  12 62585.4 3564.77  14
  -3  -2  12 71545.3 3516.86  20
  -3  -2  12 56157.4 3293.22  22
  -3  -2  11 46501.4 1965.34  35
  -3  -2  10 129901. 5132.99  35
  -3  -2   9 2362.14 200.546  35
   3   2  -8 323557. 12414.9  38
   3   2  -7 3398.53 207.279  38
  -3  -2   7 3468.17 236.561   2
   3   2  -6 165738. 6400.34  38
  -3  -2   6 165527. 6442.60   2
   3   2  -5 1385.79 117.929  38
  -3  -2   5 1464.84 144.868   2
   3   2  -4 181811. 6998.10  38
  -3  -2   4 180901. 7036.01   2
   3   2  -3 15877.0 688.841  38
   3   2  -2 78193.1 3015.69  38
  -3  -2   2 75301.5 3038.24   2
  -3  -2   1 48703.8 1966.05   2
  -3  -2   0 38184.1 1564.13   2
   3   2   1 71551.9 2722.31  38
  -3  -2  -1 66187.9 2739.30   2
   3   2   2 4674.82 248.813  38
  -3  -2  -2 4236.63 264.010   2
   3   2   3 21997.4 911.513  38
  -3  -2  -3 21148.4 935.266   2
   3   2   4 22665.7 964.779  38
  -3  -2  -4 23774.9 1001.72   2
   3   2   5 104.292 44.0847  38
  -3  -2  -5 115.166 53.1947   2
  -3  -2  -6 84419.5 3347.42   2
  -3  -2  -7 346.589 74.4522   2
   3   2   8 59004.8 2733.67  37
   3   2   8 57952.4 2411.07  15
   3   2   8 64954.9 3350.44  30
   3   2   8 61624.7 3063.22  28
   3   2   8 61847.3 3195.51  26
   3   2   9 5258.73 533.125  37
   3   2   9 6251.40 811.423  17
   3   2   9 5516.00 742.807  26
   3   2   9 5096.12 672.274  28
   3   2   9 5530.54 797.618  30
   3   2  10 6387.04 628.655  37
   3   2  10 6925.91 860.860  26
   3   2  10 7506.86 962.341  30
   3   2  10 7938.93 875.087  28
   3   2  10 6905.79 764.045  29
   3   2  11 189.210 133.628  37
   3   2  11 358.585 245.355  28
   3   2  11 351.403 220.347  29
   3   2  11 293.572 241.423  26
   3   2  12 14536.2 1076.99  37
   3   2  12 14813.6 1305.98  21
   3   2  12 13974.6 1309.32  28
   3   2  12 15475.5 1290.61  29
   3   2  12 15340.2 1386.93  26
   3   2  13 15834.0 1145.12  37
   3   2  13 14980.5 1345.19  21
   3   2  13 18084.1 1470.51  28
   3   2  13 15970.0 1329.48  29
   3   2  13 15614.2 1423.60  26
   3   2  14 14887.4 1105.44  37
   3   2  14 15508.3 1326.69  21
   3   2  14 11876.0 1079.18  16
   3   2  14 16739.5 1444.53  26
   3   2  14 13979.4 1305.11  28
   3   2  14 15016.5 1287.00  29
   3   2  15 3167.06 463.135  37
   3   2  15 3581.93 649.934  26
   3   2  15 3836.93 643.123  28
   3   2  15 3815.34 615.394  29
   3   2  16 10281.4 867.345  37
   3   2  16 11351.0 1140.07  26
   3   2  16 10749.1 1035.75  29
   3   2  17 8646.67 761.636  37
   3   2  17 12013.5 1104.25  26
   3   2  17 11195.6 1010.13  29
   3   2  18 8468.19 693.277  37
   3   2  18 9577.39 939.833  26
   3   2  18 9292.84 854.068  29
   3   2  19 11847.4 978.448  26
   3   2  19 12671.1 933.084  25
   3   2  20 8185.18 631.654  25
   3   2  20 7639.94 674.328  26
  -3  -3  23 2952.68 439.019  22
  -3  -3  23 2533.56 471.144  20
  -3  -3  22 164.342 179.832  22
  -3  -3  22 78.8045 194.312  20
  -3  -3  21 6361.01 786.749  22
  -3  -3  21 6220.10 844.027  20
  -3  -3  20 927.898 404.154  20
  -3  -3  20 953.498 364.498  22
  -3  -3  20 1360.64 345.345  34
  -3  -3  20 1160.04 382.036  31
  -3  -3  19 577.997 370.146  19
  -3  -3  19 512.357 1283.93  21
  -3  -3  19 177.707 269.329  20
  -3  -3  19 633.679 260.433  34
  -3  -3  19 659.928 353.230  31
  -3  -3  19 594.997 296.155  22
  -3  -3  18 3077.88 327.888  35
  -3  -3  18 2984.52 778.449  19
  -3  -3  18 3931.13 1385.71  21
  -3  -3  18 2328.95 595.004  20
  -3  -3  18 1775.44 557.793  31
  -3  -3  18 1959.78 430.639  34
  -3  -3  18 3039.39 607.705  22
  -3  -3  17 9551.76 827.561  37
  -3  -3  17 10543.0 667.689  35
  -3  -3  17 10432.6 1562.44  21
  -3  -3  17 9837.15 1203.48  20
  -3  -3  17 9454.78 1392.39  19
  -3  -3  17 9619.71 982.446  34
  -3  -3  17 9452.60 1188.87  31
  -3  -3  17 11963.1 1216.69  22
  -3  -3  17 8531.48 937.613  23
  -3  -3  16 10653.1 888.477  37
  -3  -3  16 13349.9 746.314  35
  -3  -3  16 12614.8 1611.06  19
  -3  -3  16 11655.1 1506.90  21
  -3  -3  16 11215.5 1281.91  20
  -3  -3  16 11464.6 1075.02  34
  -3  -3  16 9515.04 1208.42  31
  -3  -3  16 10476.1 1172.48  22
  -3  -3  16 10874.7 1073.48  23
  -3  -3  15 28408.9 1267.83  35
  -3  -3  15 24985.2 1492.34  37
  -3  -3  15 27404.8 2434.78  19
  -3  -3  15 23928.4 1941.29  20
  -3  -3  15 21628.6 1956.55  21
  -3  -3  15 26133.5 1728.83  34
  -3  -3  15 20619.5 1886.23  31
  -3  -3  15 25778.2 1895.62  22
  -3  -3  15 19669.8 1633.18  23
  -3  -3  14 157.555 93.8073  35
  -3  -3  14 381.936 592.195  21
  -3  -3  14 688.608 455.874  19
  -3  -3  14 415.323 265.678  20
  -3  -3  14-59.3204 214.690  31
  -3  -3  14 166.511 188.883  23
  -3  -3  14 190.962 235.443  22
  -3  -3  13 29035.2 1323.16  35
  -3  -3  13 26399.7 2016.90  21
  -3  -3  13 28552.6 1990.55  20
  -3  -3  13 26466.3 1896.47  22
  -3  -3  12 2071.41 223.506  35
  -3  -3  12 1531.13 537.282  21
  -3  -3  12 2000.12 455.454  22
  -3  -3  12 2529.71 498.783  20
  -3  -3  11 50248.1 3103.04  21
  -3  -3  11 57517.5 2475.61  18
  -3  -3  11 54178.6 3055.72  22
   3   3 -10 12871.1 603.554  38
  -3  -3  10 14207.2 692.052  35
   3   3  -9 74749.7 2960.48  38
   3   3  -8 6184.26 333.920  38
   3   3  -7 158795. 6159.72  38
  -3  -3   6 27595.0 1256.16   2
   3   3  -6 29788.4 1213.00  38
  -3  -3   5 76424.2 3160.57   2
   3   3  -5 80314.5 3112.47  38
   3   3  -4 47366.8 1911.15  38
   3   3  -3 77620.5 3061.17  38
  -3  -3   2 32201.1 1454.06   2
   3   3  -2 36285.5 1421.51  38
  -3  -3   1 23814.7 1051.83   2
  -3  -3   0 13555.4 669.241   2
   3   3   0 14490.8 642.324  38
  -3  -3  -1 39508.1 1714.73   2
   3   3   1 42774.8 1686.12  38
  -3  -3  -2 17913.1 838.213   2
   3   3   2 18658.8 805.133  38
  -3  -3  -3 16374.4 796.908   2
   3   3   3 18015.8 764.072  38
  -3  -3  -4 73079.8 2915.24   2
   3   3   4 71682.7 2855.71  38
  -3  -3  -5 25747.8 1119.22   2
   3   3   5 24863.0 1060.73  38
  -3  -3  -6 1890.14 182.124   2
   3   3   6 1963.00 149.437  38
  -3  -3  -7 31572.0 1325.32   2
   3   3   7 28519.6 1907.34  26
   3   3   7 26824.8 1801.87  28
   3   3   8 184.647 79.8511  15
   3   3   8 170.395 201.908  26
   3   3   8 259.017 177.236  29
   3   3   8 192.431 158.044  28
   3   3   9 41018.8 2455.14  26
   3   3   9 36556.9 2310.56  28
   3   3   9 40867.2 2275.63  29
   3   3  10 22177.6 1677.30  26
   3   3  10 20648.0 1594.47  28
   3   3  10 21248.4 1517.94  29
   3   3  11 16852.5 1425.82  26
   3   3  11 12038.0 1222.62  25
   3   3  11 15870.7 1365.90  28
   3   3  11 16644.0 1305.13  29
   3   3  12 7718.25 724.765  37
   3   3  12 10134.8 988.512  29
   3   3  12 9387.50 1016.14  28
   3   3  12 10126.3 1084.14  26
   3   3  12 7496.90 927.356  25
   3   3  13 29687.0 1699.18  37
   3   3  13 27351.6 2003.28  21
   3   3  13 31435.4 2006.04  29
   3   3  13 33290.5 2189.86  26
   3   3  13 31412.1 2082.50  25
   3   3  14 10580.1 868.761  37
   3   3  14 9800.04 978.138  16
   3   3  14 13936.5 1271.26  26
   3   3  14 13200.9 1201.83  25
   3   3  14 14770.3 1203.28  29
   3   3  15 9734.01 791.141  37
   3   3  15 10720.4 1098.58  26
   3   3  15 9765.22 989.752  25
   3   3  15 12317.7 1073.78  29
   3   3  16 15037.1 1033.92  37
   3   3  16 19577.0 1454.57  26
   3   3  16 18389.7 1344.73  25
   3   3  16 20319.6 1387.00  29
   3   3  17 4654.24 628.239  26
   3   3  17 4084.90 549.658  25
   3   3  18 16928.0 1179.77  26
   3   3  18 15285.6 1065.35  25
   3   3  19 88.0840 102.217  25
   3   3  19-43.8873 174.966  26
  -3  -4  23 1079.99 251.900  22
  -3  -4  22 11282.6 921.582  22
  -3  -4  22 8185.65 884.851  20
  -3  -4  21 3672.72 625.203  20
  -3  -4  21 4734.36 648.094  22
  -3  -4  21 5340.33 728.674  31
  -3  -4  20 976.831 379.093  20
  -3  -4  20 1981.52 448.905  22
  -3  -4  20 989.349 271.310  34
  -3  -4  20 1393.83 438.265  31
  -3  -4  19 2663.40 712.340  19
  -3  -4  19 2219.38 536.955  20
  -3  -4  19 2938.47 585.605  22
  -3  -4  19 2343.93 438.707  34
  -3  -4  19 2894.54 628.366  31
  -3  -4  18 10562.1 1206.30  20
  -3  -4  18 14123.3 1659.79  19
  -3  -4  18 11439.2 1306.58  31
  -3  -4  18 11658.1 1046.24  34
  -3  -4  18 12271.4 1225.67  22
  -3  -4  17 4434.22 396.464  35
  -3  -4  17 4779.92 1006.62  19
  -3  -4  17 3293.00 675.140  20
  -3  -4  17 4642.43 837.295  31
  -3  -4  17 3301.62 541.109  34
  -3  -4  17 4968.14 760.946  22
  -3  -4  17 4116.85 658.518  23
  -3  -4  16 13341.3 775.626  35
  -3  -4  16 11358.4 1063.03  34
  -3  -4  16 13303.9 1339.59  20
  -3  -4  16 14395.7 1735.06  19
  -3  -4  16 12423.1 1408.42  31
  -3  -4  16 13147.0 1275.17  22
  -3  -4  16 11639.4 1176.97  23
  -3  -4  15 327.376 115.976  35
  -3  -4  15 186.289 284.983  19
  -3  -4  15 157.227 277.744  20
  -3  -4  15 281.637 213.131  23
  -3  -4  15 199.322 264.098  22
  -3  -4  14 4531.31 368.639  35
  -3  -4  14 5487.58 1066.42  19
  -3  -4  14 3435.63 640.060  20
  -3  -4  14 3952.97 671.521  22
  -3  -4  13 34188.5 1524.91  35
  -3  -4  13 29473.0 2086.73  22
  -3  -4  12 23889.2 1082.89  35
  -3  -4  12 23357.8 2119.55  19
  -3  -4  12 20155.0 1047.83  18
  -3  -4  12 21278.3 1592.50  22
   3   4 -11 64209.4 2526.96  38
  -3  -4  11 66446.6 2640.88  35
  -3  -4  11 57875.2 2646.31  18
  -3  -4  11 58826.1 3223.76  22
   3   4 -10 22621.2 967.143  38
  -3  -4  10 23522.8 1048.93  35
  -3  -4  10 20109.3 1083.86  18
   3   4  -9 55357.4 2189.25  38
   3   4  -9 49558.6 2431.67  40
   3   4  -8 50342.0 1994.90  38
   3   4  -8 44217.8 2228.86  40
   3   4  -7 96515.6 3711.49  38
   3   4  -7 85941.0 3962.02  40
   3   4  -6 7943.42 421.216  38
   3   4  -5 25120.4 1086.78  38
   3   4  -4 1053.38 124.920  38
  -3  -4   3 418.544 99.5445   2
   3   4  -3 630.039 95.8629  38
  -3  -4   2 10688.8 595.979   2
   3   4  -2 11993.9 559.123  38
  -3  -4   1 3022.11 251.234   2
  -3  -4   0 359.354 99.1267   2
   3   4   0 184.045 64.5351  38
  -3  -4  -1 5849.05 393.335   2
   3   4   1 7016.05 369.148  38
  -3  -4  -2 360.507 96.9212   2
   3   4   2 295.797 131.606  40
   3   4   2 314.729 75.2212  38
  -3  -4  -3 27537.6 1291.00   2
   3   4   3 30447.9 1239.02  38
   3   4   3 28091.3 1465.29  40
  -3  -4  -4 14083.6 732.211   2
   3   4   4 14917.6 673.549  38
   3   4   4 13844.3 872.235  40
  -3  -4  -5 17260.8 840.854   2
   3   4   5 17168.8 773.306  38
   3   4   5 15710.0 966.750  40
  -3  -4  -5 18476.4 940.624  18
   3   4   6 18430.8 848.668  38
  -3  -4  -6 21578.3 1021.54  18
   3   4   6 21124.4 1462.99  26
   3   4   7 39464.5 1653.15  38
   3   4   7 40800.9 1812.26  15
   3   4   7 45119.7 2473.94  26
   3   4   7 47106.0 2312.96  29
   3   4   8 1214.44 171.906  15
   3   4   8 1064.32 347.058  26
   3   4   8 916.730 289.395  29
   3   4   9 11220.4 1096.55  26
   3   4   9 10025.5 961.112  29
   3   4  10 8368.06 956.381  26
   3   4  10 8886.15 909.786  29
   3   4  11 20069.5 1560.89  26
   3   4  11 16214.2 1462.26  25
   3   4  11 20684.7 1471.04  29
   3   4  12 39857.6 2475.41  26
   3   4  12 39881.7 2469.19  25
   3   4  12 41436.1 2381.12  29
   3   4  13 49465.0 2781.59  26
   3   4  13 44369.5 2681.41  25
   3   4  13 48827.3 2650.92  29
   3   4  14 3852.20 567.988  16
   3   4  14 4553.38 666.921  26
   3   4  14 4738.60 663.343  25
   3   4  14 4025.29 590.026  29
   3   4  15 43940.2 2408.24  26
   3   4  15 38930.5 2303.45  25
   3   4  16 4082.19 561.043  26
   3   4  16 4428.65 556.610  25
   3   4  17 19334.9 1259.40  26
   3   4  17 19845.1 1222.50  25
   3   4  18 611.365 167.650  25
  -3  -5  22 20331.1 1257.56  22
  -3  -5  22 20525.3 1394.33  31
  -3  -5  21 887.737 277.143  22
  -3  -5  21 1263.52 379.906  31
  -3  -5  20 8934.10 897.014  22
  -3  -5  20 8468.19 1000.37  31
  -3  -5  19 10967.6 1391.20  19
  -3  -5  19 10032.7 1007.49  22
  -3  -5  19 9727.38 1158.77  31
  -3  -5  18 5413.59 1071.16  19
  -3  -5  18 6806.76 819.075  23
  -3  -5  18 6079.99 810.250  22
  -3  -5  18 5409.52 648.602  34
  -3  -5  17 272.862 352.488  19
  -3  -5  17 651.282 230.732  34
  -3  -5  17 829.326 345.802  23
  -3  -5  17 556.295 291.361  22
  -3  -5  16 4824.83 637.599  34
  -3  -5  16 7483.79 1259.39  19
  -3  -5  16 5778.25 803.992  22
  -3  -5  16 5484.78 787.951  23
  -3  -5  16 5105.97 860.704  31
  -3  -5  15 50.7390 183.575  23
  -3  -5  15 94.0626 192.942  22
  -3  -5  15 63.8072 261.752  31
  -3  -5  14 13652.6 1677.13  19
  -3  -5  14 13808.8 1257.01  22
  -3  -5  14 12932.9 1403.36  31
  -3  -5  13 14132.2 1708.08  19
  -3  -5  13 15841.7 1311.52  22
  -3  -5  13 12501.5 1401.54  31
  -3  -5  12 44747.4 3164.90  19
  -3  -5  12 38778.2 1806.51  18
  -3  -5  12 41319.0 2411.87  22
   3   5 -11 9419.26 480.684  38
   3   5 -11 8928.17 686.510  40
  -3  -5  11 7930.22 1238.20  19
  -3  -5  11 8596.56 588.490  18
  -3  -5  11 6923.09 899.821   5
  -3  -5  11 8198.97 896.504  22
  -3  -5  10 38271.2 2557.03   5
   3   5 -10 46164.7 1836.23  38
   3   5 -10 43485.1 2135.62  40
  -3  -5  10 41401.1 1987.77  18
  -3  -5  10 44139.5 3106.73  19
  -3  -5   9 13778.9 1292.57   5
  -3  -5   9 13726.1 1160.76   3
   3   5  -9 14346.9 683.892  38
   3   5  -9 14115.6 929.853  40
  -3  -5   9 13436.8 1511.01  19
  -3  -5   9 13095.7 816.498  18
  -3  -5   8 89875.4 5024.81   5
   3   5  -8 104894. 4572.85  40
  -3  -5   8 96214.1 5471.94  19
  -3  -5   8 100104. 4427.79  18
  -3  -5   7 282.101 213.440   5
   3   5  -7 254.387 80.8530  38
  -3  -5   7 256.889 277.861  19
  -3  -5   7 242.830 136.425  18
  -3  -5   6 31865.0 2261.59   5
   3   5  -6 39140.0 1614.19  38
  -3  -5   5 22068.2 1781.36   5
   3   5  -5 27777.9 1185.91  38
   3   5  -4 39579.1 1665.49  38
   3   5  -3 249.779 73.0722  38
  -3  -5   2 14000.3 1247.26   5
  -3  -5   1 1861.32 430.386   3
  -3  -5   1 1682.58 436.059   5
  -3  -5   0 25489.5 1726.88   3
   3   5   0 23292.1 1029.08  38
  -3  -5  -1 285.053 275.614   5
  -3  -5  -1 133.826 182.999   3
   3   5   1 31.8442 56.4796  38
  -3  -5  -1 91.8387 112.728  18
  -3  -5  -2 3484.07 604.707   3
  -3  -5  -2 2384.68 527.005   5
   3   5   2 2957.81 226.801  38
   3   5   2 2680.23 357.074  40
  -3  -5  -2 2882.37 330.409  18
  -3  -5  -3 2170.08 500.048   3
  -3  -5  -3 1803.18 474.354   5
   3   5   3 1865.22 172.214  38
   3   5   3 1482.08 269.833  40
  -3  -5  -3 1696.89 256.294  18
  -3  -5  -4 700.101 321.672   5
  -3  -5  -4 1014.58 362.678   3
   3   5   4 785.803 192.388  40
   3   5   4 581.432 100.094  38
  -3  -5  -4 657.975 165.514  18
  -3  -5  -5 1417.99 424.861   3
   3   5   5 1014.07 126.222  38
   3   5   5 1091.37 221.465  40
  -3  -5  -5 1205.00 206.036  18
   3   5   6 13698.9 654.541  38
   3   5   6 12399.3 840.368  40
   3   5   6 14546.2 820.961  15
   3   5   6 13840.8 1163.96  10
   3   5   7 3799.71 351.497  15
   3   5   7 3689.84 555.447  10
   3   5   8 4439.41 375.802  15
   3   5   8 6870.19 783.580  26
   3   5   8 5809.29 660.474  29
   3   5   9 15136.3 1238.78  26
   3   5   9 13360.3 1116.30  29
   3   5  10 25189.7 1727.48  26
   3   5  10 24305.6 1762.33  25
   3   5  10 23949.2 1610.70  29
   3   5  11 1246.72 369.688  25
   3   5  11 1053.26 361.626  26
   3   5  12 63576.5 3264.17  26
   3   5  12 62176.1 3286.88  25
   3   5  13 1659.61 399.090  25
   3   5  13 1630.02 373.741  26
   3   5  13 1410.38 358.081  16
   3   5  14 64811.8 3068.40  26
   3   5  14 65747.2 3086.84  25
   3   5  15 153.110 160.034  25
   3   5  15 204.221 191.298  26
   3   5  16 45615.0 2190.66  25
  -3  -6  22 996.400 272.998  31
  -3  -6  21 25706.8 1404.69  22
  -3  -6  20 3861.24 503.268  22
  -3  -6  19 14239.4 1105.24  22
  -3  -6  19 14972.6 1354.59  31
  -3  -6  18 11584.2 1503.01  19
  -3  -6  18 10241.9 957.921  22
  -3  -6  18 9804.44 1003.06  23
  -3  -6  18 11168.8 1207.45  31
  -3  -6  17 6211.31 746.802  22
  -3  -6  17 6157.59 821.711  23
  -3  -6  17 5925.08 906.360  31
  -3  -6  16-86.8694 428.285  19
  -3  -6  16 182.670 288.438  31
  -3  -6  16 297.157 270.904  23
  -3  -6  16 39.5303 187.279  22
  -3  -6  15 21535.1 1097.10  35
  -3  -6  15 18293.2 2015.17  19
  -3  -6  15 21085.5 1836.70  31
  -3  -6  15 18988.1 1489.30  22
  -3  -6  14 3217.91 324.065  35
  -3  -6  14 2445.51 761.844  19
  -3  -6  14 2103.27 608.160  31
  -3  -6  14 3199.83 545.030  22
  -3  -6  13 9447.69 1237.82  31
  -3  -6  13 12614.2 732.053  35
  -3  -6  13 12138.5 1597.54  19
  -3  -6  12 742.711 161.672  35
   3   6 -12 376.371 157.725  40
  -3  -6  12 969.081 497.029  19
  -3  -6  12 362.937 144.490  18
   3   6 -11 6378.38 388.948  38
   3   6 -11 6169.70 585.938  40
  -3  -6  11 7268.16 490.623  35
  -3  -6  11 5627.89 1051.16  19
  -3  -6  11 5532.22 494.789  18
   3   6 -10 93.0591 145.835  40
   3   6 -10 80.6503 61.9386  38
  -3  -6  10 163.859 296.421  19
  -3  -6  10 337.660 142.543  18
  -3  -6  10-44.8133 193.814   3
  -3  -6  10 227.646 280.606   5
   3   6  -9 60274.3 2315.58  38
   3   6  -9 55331.6 2656.28  40
  -3  -6   9 52108.7 2484.84  18
  -3  -6   9 45317.1 3402.81  19
  -3  -6   9 45353.0 3146.33   5
  -3  -6   9 54230.9 3099.22   3
   3   6  -8 123.352 70.9650  38
   3   6  -8 190.191 152.588  40
  -3  -6   8 148.293 304.209  19
  -3  -6   8 258.373 135.429  18
  -3  -6   8 95.2152 225.577   3
  -3  -6   8 236.454 302.491   5
   3   6  -7 49341.6 1961.26  38
  -3  -6   7 44414.9 2149.97  18
  -3  -6   7 40674.5 2983.75  19
  -3  -6   7 35608.3 2728.71   5
  -3  -6   7 48530.8 2788.35   3
   3   6  -6 7115.74 410.098  38
  -3  -6   6 5095.18 497.547  18
  -3  -6   6 5940.43 943.211  19
  -3  -6   6 6243.29 925.524   5
  -3  -6   6 6777.97 870.580   3
   3   6  -5 80574.0 3285.69  38
  -3  -6   5 86726.0 4258.43   3
   3   6  -4 898.145 136.287  38
  -3  -6   4 801.210 207.169  18
  -3  -6   4 810.902 354.886   3
  -3  -6   3 59685.4 2842.37  18
  -3  -6   3 54347.3 3502.69   5
  -3  -6   2 580.572 183.345  18
  -3  -6   2 401.315 304.202   5
  -3  -6   2 395.167 279.128   3
   3   6  -1 76326.0 2847.73  38
  -3  -6   1 60776.4 3001.73  18
  -3  -6   1 54130.4 3654.75   5
  -3  -6   1 71822.7 3759.23   3
   3   6   0 281.639 86.7436  38
  -3  -6   0 34.8667 106.838  18
  -3  -6   0 153.594 232.288   3
  -3  -6   0 295.757 333.553   5
   3   6   1 24223.9 1038.27  38
   3   6   1 20687.4 1302.52  40
  -3  -6  -1 20130.3 1189.69  18
  -3  -6  -1 17268.9 1705.77   5
  -3  -6  -1 25814.3 1861.21   3
   3   6   2 29.7568 56.6955  38
   3   6   2 137.363 132.836  40
  -3  -6  -2 120.552 120.100  18
  -3  -6  -2 179.846 295.560   5
  -3  -6  -2 265.911 241.194   3
   3   6   3 2671.13 228.606  38
   3   6   3 2704.15 383.173  40
  -3  -6  -3 2707.70 334.080  18
  -3  -6  -3 3279.82 640.670   3
  -3  -6  -3 2241.98 585.150   5
   3   6   4 1147.57 143.450  38
   3   6   4 1115.03 242.091  40
  -3  -6  -4 1044.62 211.036  18
   3   6   4 1079.04 371.383  10
  -3  -6  -4 1673.15 485.860   3
   3   6   5 180.613 129.006  40
   3   6   5 234.020 73.2858  38
   3   6   5 166.591 115.632  15
   3   6   5 608.590 291.325  10
  -3  -6  -5 477.866 290.536   3
   3   6   6 15770.2 989.389  40
   3   6   6 18345.0 1392.56  10
   3   6   6 15511.7 911.285  15
   3   6   7 1591.35 377.581  10
   3   6   7 1389.58 213.269  15
  -3  -6  -7 1445.14 435.374   3
   3   6   8 123.397 159.145  25
   3   6   9 2510.38 490.608  25
  -3  -6 -10 5634.12 713.267   8
   3   6  10 4195.64 620.637  25
   3   6  11 29433.9 1821.54  25
   3   6  12 2235.49 412.406  25
   3   6  12 2250.88 439.753  16
   3   6  13 33161.5 1771.42  25
   3   6  13 30256.3 1801.29  16
   3   6  14 8095.17 655.642  25
   3   6  15 4004.04 372.558  25
  -3  -7  21 4421.60 519.815  31
  -3  -7  20 1239.64 328.650  31
  -3  -7  19 5604.71 731.823  31
  -3  -7  18 10446.6 972.396  23
  -3  -7  18 9995.90 1075.58  31
  -3  -7  17 18418.0 1472.11  23
  -3  -7  17 20899.3 1660.76  31
  -3  -7  16 12235.6 1210.10  23
  -3  -7  16 13555.1 1346.01  31
  -3  -7  15 1830.26 524.892  31
  -3  -7  15 2680.03 763.816  19
  -3  -7  14 2845.24 643.284  31
  -3  -7  14 3281.51 842.740  19
  -3  -7  13 602.955 359.883  31
  -3  -7  13 508.052 134.795  35
  -3  -7  13 349.465 414.268  19
  -3  -7  12 16429.4 1591.69  31
   3   7 -12 15860.5 1077.35  40
  -3  -7  12 19768.0 981.893  35
  -3  -7  12 16623.9 1887.63  19
  -3  -7  11 9493.88 1167.59  31
   3   7 -11 10240.7 564.417  38
   3   7 -11 10293.3 810.992  40
  -3  -7  11 8580.13 694.188  18
  -3  -7  11 10527.3 1450.31  19
   3   7 -10 3013.38 526.185  10
   3   7 -10 2581.67 230.794  38
   3   7 -10 2621.55 392.849  40
  -3  -7  10 2747.89 286.540  35
  -3  -7  10 2582.04 735.657  19
  -3  -7  10 2021.48 313.271  18
   3   7  -9 13492.4 667.505  38
   3   7  -9 11501.3 920.464  40
  -3  -7   9 10472.0 800.698  18
  -3  -7   9 10769.1 1437.67  19
   3   7  -9 13667.3 1175.86  10
  -3  -7   9 12210.9 1257.08   3
   3   7  -8 1148.60 157.625  38
   3   7  -8 1214.78 284.282  40
  -3  -7   8 846.632 435.387  19
  -3  -7   8 714.774 209.385  18
  -3  -7   8 703.309 279.905   8
  -3  -7   8 993.343 393.720   3
  -3  -7   8 468.698 356.384   5
   3   7  -7 53.1126 130.950  40
   3   7  -7 43.3475 68.1485  38
  -3  -7   7 73.1853 283.051  19
  -3  -7   7 96.8236 118.444  18
  -3  -7   7 125.384 180.736   8
  -3  -7   7 136.485 309.487   5
  -3  -7   7 337.683 352.661   3
   3   7  -6 41265.7 1672.58  38
  -3  -7   6 35145.2 1860.15  18
  -3  -7   6 38189.3 2553.07   3
   3   7  -5 10734.3 595.423  38
  -3  -7   5 11201.5 1236.64   3
  -3  -7   4 37058.3 1971.79  18
  -3  -7   4 29901.1 2565.57   5
  -3  -7   3 13041.9 857.039  18
  -3  -7   3 11064.5 1338.90   5
  -3  -7   2 36357.8 1818.62  18
  -3  -7   2 30002.7 2468.14   5
   3   7  -1 56166.1 2133.82  38
   3   7  -1 54160.1 2544.85  40
  -3  -7   1 41311.4 2268.95  18
  -3  -7   1 52701.1 3127.95   3
  -3  -7   1 34642.7 2896.79   5
   3   7   0 21373.2 942.146  38
   3   7   0 19545.7 1246.92  40
  -3  -7   0 16407.2 1084.18  18
   3   7   0 18616.8 1595.11  10
  -3  -7   0 21144.0 1743.62   3
   3   7   1 11045.6 585.550  38
   3   7   1 10761.1 844.919  40
  -3  -7  -1 8733.31 713.809  18
   3   7   1 10978.6 1145.51  10
  -3  -7  -1 10056.0 1181.38   3
   3   7   2 47618.0 1961.96  38
   3   7   2 46403.5 2316.91  40
  -3  -7  -2 42045.2 2167.65  18
   3   7   2 45086.1 2158.02  15
   3   7   2 51017.3 2881.34  10
  -3  -7  -2 49887.7 2986.00   3
   3   7   3 4246.53 305.499  38
   3   7   3 4148.58 487.939  40
  -3  -7  -3 3927.50 432.361  18
   3   7   3 3937.85 419.592  15
   3   7   3 4797.17 729.185  10
  -3  -7  -3 5225.28 836.544   3
   3   7   4 13878.9 685.910  38
   3   7   4 14073.5 951.314  40
   3   7   4 12386.3 827.816  15
   3   7   4 14252.1 1292.67  10
  -3  -7  -4 16551.3 1485.64   3
   3   7   5 249.772 136.800  40
   3   7   5 88.4411 191.414  10
   3   7   5 300.243 128.503  15
  -3  -7  -5 161.940 266.272   3
  -3  -7  -6 10230.4 1088.95   3
   3   7   6 7817.82 842.802  25
   3   7   6 8397.82 898.396  10
   3   7   7 2555.03 454.123  25
  -3  -7  -7 2007.51 466.569   3
  -3  -7  -8 8226.65 930.156   8
   3   7   8 8585.94 820.230  25
  -3  -7  -9 2019.16 431.374   8
   3   7   9 1649.48 343.609  25
  -3  -7 -10 7523.90 756.840   8
   3   7  10 8988.88 751.839  25
   3   7  11 831.440 211.164  25
   3   7  11 580.222 245.043  16
   3   7  12 3529.37 360.841  25
   3   7  12 2812.79 432.977  16
   3   7  13 1630.07 281.665  16
  -3  -8  19 1934.95 371.163  31
  -3  -8  18 15995.9 1226.14  31
  -3  -8  18 16019.0 1147.89  23
  -3  -8  17 5367.70 703.899  31
  -3  -8  17 3913.35 589.652  23
  -3  -8  16 6087.83 787.497  31
  -3  -8  16 5067.47 699.655  23
  -3  -8  15 6241.68 837.313  31
  -3  -8  15 5927.29 815.201  23
  -3  -8  14 8776.97 1015.85  31
  -3  -8  13 7413.94 965.969  31
   3   8 -12 4706.21 486.411  40
  -3  -8  12 4747.19 758.215  31
   3   8 -11 514.315 196.119  40
   3   8 -11 868.211 285.302  10
  -3  -8  11 877.840 346.846  31
   3   8 -10 4403.10 513.989  40
  -3  -8  10 3725.41 700.030  31
   3   8 -10 4822.89 665.815  10
   3   8  -9 13793.6 708.208  38
   3   8  -9 12148.2 964.571  40
  -3  -8   9 15551.8 795.038  35
  -3  -8   9 10713.3 846.031  18
  -3  -8   9 13462.8 1303.22  31
   3   8  -9 16549.3 1308.78  10
   3   8  -8 1875.71 204.477  38
   3   8  -8 1628.87 327.588  40
  -3  -8   8 1735.72 297.635  18
  -3  -8   8 1105.74 388.446  31
   3   8  -8 1665.79 448.362  10
  -3  -8   8 1274.03 365.297   8
   3   8  -7 13123.3 666.865  38
   3   8  -7 10796.8 905.112  40
  -3  -8   7 10257.8 813.106  18
  -3  -8   7 10847.9 1241.53   3
   3   8  -7 13079.5 1213.81  10
  -3  -8   7 11477.9 1112.86   8
   3   8  -6 8458.59 513.494  38
   3   8  -6 8357.29 766.587  40
  -3  -8   6 7637.27 668.952  18
   3   8  -6 10021.3 1061.36  10
  -3  -8   6 8816.85 976.472   8
  -3  -8   6 8235.50 1081.85   3
   3   8  -5 9686.73 569.382  38
   3   8  -5 10094.6 842.357  40
  -3  -8   5 8584.68 1134.74   3
  -3  -8   5 10384.2 1109.83   8
   3   8  -5 10929.8 1126.42  10
   3   8  -4 5609.69 379.848  38
   3   8  -4 5745.45 609.543  40
   3   8  -4 5196.04 775.491  10
  -3  -8   4 5115.52 783.585   8
  -3  -8   4 3700.41 452.495  18
  -3  -8   3 11116.2 838.251  18
  -3  -8   3 12217.0 1341.53   3
   3   8  -3 13099.9 1268.31  10
  -3  -8   3 15274.3 1366.86   8
   3   8  -2 81296.3 3145.21  38
   3   8  -2 86030.8 3627.60  40
  -3  -8   2 63403.8 3324.45  18
  -3  -8   2 69147.2 4122.89   3
   3   8  -2 77003.1 4042.74  10
  -3  -8   1 9978.53 1200.33   3
   3   8  -1 9873.01 549.216  38
   3   8  -1 10686.0 850.070  40
  -3  -8   1 7561.23 676.406  18
   3   8  -1 8737.41 665.024  15
   3   8   0 55101.8 2244.76  38
   3   8   0 59053.3 2679.41  40
  -3  -8   0 53409.6 3269.10   3
   3   8   0 55551.8 3182.55  10
   3   8   1 2370.89 223.906  38
   3   8   1 2359.52 379.182  40
  -3  -8  -1 2271.02 584.973   3
   3   8   1 2777.49 582.841  10
   3   8   2 48217.4 2372.71  40
  -3  -8  -2 45777.5 2990.59   3
   3   8   2 50953.9 2912.39  10
   3   8   3 128.018 123.974  40
   3   8   3 187.310 239.678  10
  -3  -8  -3 311.505 284.043   8
  -3  -8  -3 389.618 313.871   3
  -3  -8  -4 17984.9 1485.45   8
   3   8   4 16270.2 1347.96  10
  -3  -8  -4 14063.5 1389.71   3
  -3  -8  -5 944.607 372.725   8
  -3  -8  -6 22342.5 1648.66   8
  -3  -8  -7 1792.70 413.021   8
  -3  -8  -8 6408.60 715.983   8
  -3  -8  -9 1884.73 351.979   8
  -3  -9  18 127.458 109.002  31
  -3  -9  18 87.9889 110.344  23
  -3  -9  17 11613.1 868.078  31
  -3  -9  17 12306.1 916.550  23
  -3  -9  16 103.284 149.843  31
  -3  -9  15 9706.50 877.021  31
  -3  -9  14 839.449 294.577  31
  -3  -9  13 717.298 257.266  31
  -3  -9  12 3380.99 546.892  31
   3   9 -12 3660.50 390.326  40
  -3  -9  11 4118.10 613.097  31
   3   9 -11 3373.44 412.821  40
   3   9 -11 4980.23 591.039  10
   3   9 -10 16056.6 1060.82  40
  -3  -9  10 15762.2 1824.38   4
   3   9 -10 18212.0 1309.23  10
   3   9  -9 13878.4 983.624  40
   3   9  -9 15056.6 1226.37  10
   3   9  -8 35700.8 1925.50  40
   3   9  -8 38180.8 2265.50  10
   3   9  -7 6126.85 626.913  40
   3   9  -7 6409.28 817.061  10
   3   9  -6 19520.3 1252.24  40
  -3  -9   6 17764.8 1463.70   8
   3   9  -6 21570.4 1595.25  10
   3   9  -5 34694.5 1857.30  40
   3   9  -5 35331.1 2227.16  10
  -3  -9   5 31044.1 2142.53   8
   3   9  -4 4279.86 518.263  40
   3   9  -4 4439.33 705.040  10
  -3  -9   4 3320.94 625.796   8
   3   9  -3 30123.0 2057.95  10
  -3  -9   3 30338.4 2083.68   8
   3   9  -2 254.452 170.522  40
   3   9  -2 46.6677 230.129  10
  -3  -9   2 50.1449 205.759   8
   3   9  -1 5556.90 577.272  40
   3   9   0 340.824 167.762  40
   3   9   0 281.802 265.073  10
   3   9   1 7285.43 642.609  40
  -3  -9  -1 8613.52 970.755   8
   3   9   1 8321.20 934.440  10
   3   9   2 4814.68 478.812  40
  -3  -9  -2 5956.73 797.821   8
   3   9   2 5927.20 752.990  10
   3   9   3 27267.8 1771.57  10
  -3  -9  -3 27006.0 1862.81   8
  -3  -9  -4 5792.25 757.685   8
  -3  -9  -5 15598.3 1276.14   8
  -3  -9  -5 20729.2 1767.35   4
  -3  -9  -6 2547.92 437.899   8
  -3  -9  -7 13505.1 983.062   8
   3   9   8 1005.21 229.514  16
  -3 -10  15 3229.39 408.467  23
  -3 -10  14 5130.95 553.045  23
  -3 -10  13 184.683 144.471  23
   3  10 -12 17152.2 886.800  40
   3  10 -11 94.3136 97.5500  40
   3  10 -10 12265.2 802.392  40
   3  10 -10 14004.7 982.426  10
   3  10  -9 4429.48 448.906  40
   3  10  -9 5273.48 603.293  10
   3  10  -8 30260.5 1584.40  40
  -3 -10   8 28522.9 2482.64   4
   3  10  -8 33128.4 1882.49  10
   3  10  -7 1144.10 258.791  40
  -3 -10   7 1519.86 624.107   4
   3  10  -7 2298.45 460.412  10
   3  10  -6 54300.8 2609.45  40
  -3 -10   6 62553.7 3995.79   4
   3  10  -6 58888.6 2976.65  10
   3  10  -5 2664.19 368.822  40
   3  10  -5 3278.69 558.513  10
  -3 -10   5 2172.80 440.321   8
   3  10  -4 17737.5 1331.61  10
  -3 -10   4 15504.5 1279.23   8
   3  10  -3 1711.60 298.148  40
  -3 -10   3 1911.12 432.163   8
   3  10  -3 1920.50 442.731  10
   3  10  -2 11207.5 788.164  40
  -3 -10   2 10742.9 1030.42   8
   3  10  -1 4189.06 421.114  40
  -3 -10   1 3405.92 564.968   8
   3  10   0 7563.97 579.078  40
   3  10   0 8397.93 844.269  10
   3  10   1 5519.93 645.915  10
  -3 -10  -1 4721.12 624.944   8
  -3 -10  -1 5580.31 991.347   4
  -3 -10  -2 3632.36 536.236   8
  -3 -10  -2 4133.31 787.737   4
  -3 -10  -3 2126.83 391.355   8
  -3 -10  -3 2473.86 539.291   4
   3  10   4 1376.25 234.568  16
  -3 -10  -4 866.174 247.798   8
  -3 -11  10 7853.12 619.914  23
   3  11  -9 16583.6 831.476  40
  -3 -11   9 15489.5 978.648  23
   3  11  -8 10703.9 631.253  40
  -3 -11   7 19748.3 1679.35   4
   3  11  -7 21783.1 1083.08  40
  -3 -11   6 1907.89 547.422   4
   3  11  -6 2950.21 300.703  40
   3  11  -5 11866.0 701.983  40
  -3 -11   4 2798.95 621.927   4
  -3 -11   3 23664.7 1826.69   4
   3  11  -3 23175.0 1139.20  40
  -3 -11   2 4201.57 716.525   4
   3  11  -2 4955.84 372.389  40
  -3 -11   1 8560.47 968.551   4
   4 -12  -1 6615.07 927.152   9
   4 -12  -1 4768.37 602.778   7
   4 -12   0 743.477 268.030   7
   4 -12   0 656.758 366.104   9
   4 -12   1 445.239 348.296   9
   4 -12   2 3241.14 355.630  33
  -4  12  -3 3112.55 423.576   1
   4 -12   3 3351.79 360.821  33
  -4  12  -4 756.899 223.885   1
   4 -12   4 1079.39 201.606  33
   4 -12   5 4657.69 870.328   9
   4 -12   5 5175.21 466.359  33
   4 -12   6 361.219 129.700  33
  -4  12  -7 8543.61 705.787   1
   4 -12   7 9495.82 653.715  33
  -4  12  -8 2250.89 327.243   1
   4 -12   8 1938.63 266.870  33
  -4  12  -9 36360.6 1743.37   1
   4 -12   9 33957.5 1657.19  33
   4 -11  -6 1026.86 297.363   7
   4 -11  -5 5618.71 706.454   7
   4 -11  -5 4863.45 815.476   9
   4 -11  -4 12315.1 1470.57   9
   4 -11  -4 11835.5 1103.43   7
   4 -11  -3 1922.80 633.546   9
   4 -11  -2 12013.2 1573.64   9
   4 -11  -1 370.623 380.338   9
   4 -11   0 2666.27 597.124   7
   4 -11   0 1257.54 638.790   9
  -4  11   0 1948.04 408.275   1
   4 -11   1 1256.74 416.749   7
   4 -11   1 396.969 429.858   9
  -4  11  -1 549.559 240.803   1
   4 -11   2 8738.24 1455.19   9
   4 -11   2 7503.49 990.753   7
  -4  11  -2 8703.75 866.082   1
   4 -11   3 1492.04 476.009   7
  -4  11  -3 1756.86 412.017   1
   4 -11   4 8481.37 1459.90   9
   4 -11   4 7793.16 1000.99   7
   4 -11   5-103.806 401.582   9
   4 -11   5 314.690 156.611  33
  -4  11  -6 24659.5 1544.36   1
   4 -11   6 20964.7 2272.23   9
   4 -11   6 22267.3 1403.60  33
  -4  11  -7 61.8094 207.052   1
   4 -11   7 283.622 428.755   9
   4 -11   7 102.022 115.728  33
  -4  11  -8 16791.8 1212.79   1
   4 -11   8 17062.3 1130.28  33
  -4  11  -9 1196.35 315.557   1
   4 -11   9 1574.53 300.978  33
  -4  11 -10 1135.18 281.656   1
   4 -11  10 1154.00 248.316  33
  -4  11 -11 9691.39 776.541   1
   4 -11  11 10100.1 765.705  33
  -4  11 -12 1267.81 245.258   1
   4 -11  12 1035.91 223.031  33
  -4  11 -13 19577.2 1050.20   1
   4 -10 -10 608.170 233.584   7
   4 -10  -9 1926.98 410.393   7
   4 -10  -8 3280.74 572.863   7
   4 -10  -7 2455.04 535.014   7
   4 -10  -7 1852.63 578.142   9
   4 -10  -6 11405.1 1175.89   7
   4 -10  -6 10011.9 1400.86   9
   4 -10  -5 7258.06 956.637   7
   4 -10  -5 4525.30 1048.53   9
   4 -10  -4 6397.56 911.854   7
   4 -10  -4 5355.05 1175.11   9
   4 -10  -3 1076.21 471.474   7
   4 -10  -3 993.702 605.313   9
  -4  10   3 1133.86 348.961   1
   4 -10  -2 5133.51 1183.37   9
  -4  10   2 5096.21 703.310   1
   4 -10  -1 21632.4 2468.18   9
  -4  10   1 22995.4 1664.56   1
   4 -10   0 3956.03 1104.59   9
  -4  10   0 5622.74 750.734   1
   4 -10   1 21477.7 1942.08   7
   4 -10   1 19727.5 2386.94   9
  -4  10  -1 21805.5 1619.65   1
   4 -10   2 8049.60 1155.90   7
   4 -10   2 7881.06 1527.23   9
  -4  10  -2 11870.6 1111.25   1
   4 -10   3 44483.6 3064.49   7
   4 -10   4 2458.51 941.971   9
   4 -10   4 2900.40 750.222   7
   4 -10   5 39977.7 3693.81   9
   4 -10   5 41867.3 2981.78   7
  -4  10  -5 50235.0 2685.34   1
   4 -10   6 4891.18 896.721   7
   4 -10   6 5606.41 1258.13   9
  -4  10  -6 6031.57 773.495   1
  -4  10  -7 44182.2 2505.62   1
   4 -10   7 38027.1 3505.30   9
   4 -10   7 46408.2 2436.52  33
   4 -10   8 571.946 564.944   9
   4 -10   8 961.461 282.606  33
   4 -10   9 5007.41 615.983  33
   4 -10  10 2179.83 395.364  33
  -4  10 -10 2052.87 412.338   1
   4 -10  11 236.078 156.373  33
  -4  10 -11 58.2142 154.242   1
   4 -10  12 19675.2 1311.44  33
  -4  10 -12 20510.8 1295.63   1
   4 -10  13 1790.26 328.033  33
  -4  10 -13 1695.46 320.265   1
  -4  10 -14 11363.7 759.190   1
   4 -10  15 3781.66 524.458  30
   4 -10  16 6312.87 635.841  30
   4  -9 -12 2009.85 378.385   7
  -4   9  12 3352.47 423.627  21
   4  -9 -11 8232.57 868.317   7
  -4   9  11 9399.61 828.940  21
   4  -9 -10 4583.38 695.204   7
   4  -9  -9 18235.7 1532.67   7
  -4   9   9 18236.1 1079.35  36
   4  -9  -8 539.285 345.966   7
  -4   9   8 191.075 105.001  36
   4  -9  -7 11405.9 1262.72   7
   4  -9  -7 9171.66 1505.00   9
  -4   9   7 11672.8 849.431  36
   4  -9  -6 184.464 303.345   7
   4  -9  -6 326.686 515.917   9
  -4   9   6 318.002 150.002  36
   4  -9  -5 15294.1 1519.58   7
   4  -9  -5 15484.8 2057.05   9
  -4   9   5 13628.0 1241.05   1
   4  -9  -4-65.7540 348.214   7
   4  -9  -4-121.281 438.754   9
  -4   9   4 91.2796 197.345   1
   4  -9  -3 1486.80 556.178   7
   4  -9  -3 1735.88 796.414   9
  -4   9   3 883.945 368.053   1
   4  -9  -2-125.938 487.073   9
   4  -9  -2 68.9503 282.861   7
  -4   9   2 103.032 72.5487  38
  -4   9   2 142.848 205.923   1
   4  -9  -1 11678.2 1357.85   7
   4  -9  -1 8251.72 1601.74   9
  -4   9   1 9472.96 558.575  38
  -4   9   1 9815.17 1061.99   1
   4  -9   0 4456.73 1188.42   9
  -4   9   0 3497.20 301.651  38
  -4   9   0 3782.66 664.998   1
   4  -9   0 2629.04 883.029   4
   4  -9   1 10929.1 1751.45   9
   4  -9   1 8340.30 1532.35   4
  -4   9  -1 10042.8 1075.36   1
   4  -9   2 11489.2 1854.47   9
   4  -9   2 11779.4 1427.62   7
   4  -9   2 7372.36 1504.32   4
   4  -9   3 62088.1 3737.52   7
  -4   9  -3 54388.5 2289.24  38
   4  -9   4 44994.4 3065.19   7
  -4   9  -4 39813.5 1747.52  38
   4  -9   5 77320.5 4475.11   7
  -4   9  -5 73957.6 3081.20  38
   4  -9   6 31969.1 2563.74   7
   4  -9   6 37349.4 3402.22   9
  -4   9  -6 31153.0 1413.75  38
  -4   9  -7 24990.5 1162.58  11
   4  -9   7 23043.0 2692.97   9
   4  -9   7 20398.6 2020.91   7
  -4   9  -7 24786.8 1144.20  38
   4  -9   8 15858.6 2141.26   9
   4  -9   9 65008.2 4728.33   9
   4  -9  11 30009.1 1821.17  23
   4  -9  11 35250.4 3174.32   6
   4  -9  12 757.096 253.159  23
   4  -9  13 7724.48 769.681  23
  -4   9 -13 8197.16 740.517   1
   4  -9  14 259.791 176.898  23
   4  -9  14 386.830 230.850  27
   4  -9  15 1634.24 328.320  23
   4  -9  16 725.840 220.862  23
   4  -9  16 546.556 245.315  30
   4  -9  17 137.738 126.261  23
   4  -9  17 61.5015 151.657  30
   4  -9  18 11576.4 756.634  23
   4  -9  18 12244.4 921.533  30
  -4   8  14 17587.5 1173.99  21
   4  -8 -13 326.217 223.962   7
  -4   8  13 621.403 160.500  36
  -4   8  13 598.205 259.110  21
   4  -8 -12 17783.3 1417.68   7
  -4   8  12 18260.4 1112.49  36
  -4   8  12 17174.3 1349.39  21
   4  -8 -11 244.042 267.042   7
  -4   8  11 169.832 124.321  36
   4  -8 -10 38496.4 2567.61   7
  -4   8  10 40536.5 2109.60  36
   4  -8  -9 232.025 307.387   7
  -4   8   9 309.804 154.447  36
   4  -8  -8 24464.6 2005.70   7
   4  -8  -8 21656.5 2358.68   9
  -4   8   8 24955.5 1544.12  36
  -4   8   8 26890.8 1663.61  16
  -4   8   7 4106.74 579.610  16
  -4   8   7 3920.15 647.072   1
   4  -8  -7 4242.00 799.728   7
   4  -8  -7 4834.66 1087.71   9
  -4   8   6 16111.5 1189.67  16
  -4   8   6 13380.1 1302.05   1
   4  -8  -6 16200.3 1587.16   7
   4  -8  -6 16018.0 2095.65   9
  -4   8   5 2609.61 236.832  38
  -4   8   5 3496.73 618.850   1
   4  -8  -5 2567.35 637.784   7
  -4   8   5 2452.04 245.371  11
   4  -8  -5 2802.29 947.574   9
  -4   8   4 5084.36 352.584  38
  -4   8   4 5767.26 786.874   1
  -4   8   4 4202.79 349.800  11
   4  -8  -4 5140.32 883.205   7
   4  -8  -4 6275.00 1358.11   9
  -4   8   3 1089.77 161.273  38
  -4   8   3 1226.70 178.458  11
   4  -8  -3 1358.21 697.510   9
   4  -8  -3 929.142 446.760   7
  -4   8   3 1663.15 433.251   1
   4  -8  -3 822.360 534.599   4
  -4   8   2 18179.2 916.812  38
  -4   8   2 19995.6 982.153  15
   4  -8  -2 19254.5 1770.73   7
   4  -8  -2 20991.9 2447.63   9
  -4   8   2 18764.2 1524.77   1
  -4   8   1 7424.09 482.420  38
  -4   8   1 8162.46 523.654  15
   4  -8  -1 7752.18 1492.58   9
   4  -8  -1 8276.58 1142.05   7
  -4   8   1 9217.41 1006.58   1
   4  -8  -1 5703.99 1298.20   4
  -4   8   0 2591.13 249.728  38
  -4   8   0 2114.46 242.396  15
   4  -8   0 2546.31 897.470   4
  -4   8   0 2588.05 540.210   1
   4  -8   0 2742.11 659.405   7
   4  -8   0 2540.56 880.053   9
  -4   8  -1 6641.44 445.967  15
   4  -8   1 7075.34 1393.62   9
   4  -8   1 4243.84 1114.47   4
  -4   8  -2 31148.0 1409.00  38
  -4   8  -2 33267.7 1437.16  15
   4  -8   2 35038.0 3178.40   9
   4  -8   3 2038.68 623.835   7
  -4   8  -3 1314.41 174.447  38
   4  -8   3 1094.38 601.667   4
   4  -8   4 19658.6 2408.71   9
   4  -8   4 17085.9 1833.21   7
  -4   8  -4 21228.1 987.832  38
   4  -8   4 15798.0 2145.34   4
  -4   8  -5 313.322 104.457  38
   4  -8   5 127.013 491.341   9
   4  -8   5 150.623 325.831   7
  -4   8  -6 69320.3 2840.92  38
   4  -8   6 72093.5 5067.76   9
   4  -8   6 63284.3 4081.77   7
  -4   8  -7 804.156 136.259  38
   4  -8   7 765.472 457.231   7
   4  -8   7 639.003 606.098   9
  -4   8  -8 90026.7 3613.02  38
  -4   8  -8 88753.9 3624.73  11
   4  -8   8 88234.0 5863.55   9
  -4   8  -9 6605.90 416.359  38
   4  -8   9 5883.78 1327.85   9
  -4   8  -9 6769.46 428.984  11
   4  -8   9 6368.96 749.353  23
   4  -8  10 60933.6 4591.51   9
   4  -8  10 65736.0 3308.59  23
   4  -8  11 3887.00 602.101  23
   4  -8  12 65581.3 3474.54  23
   4  -8  12 70403.6 3637.50  31
   4  -8  13 936.440 640.879   6
   4  -8  13 956.807 319.649  23
   4  -8  13 847.400 329.696  31
   4  -8  13 548.925 264.255  33
   4  -8  14 27159.6 1971.86  27
   4  -8  14 29482.7 1828.53  23
   4  -8  14 25503.8 1753.45  33
   4  -8  14 28801.0 1916.61  31
   4  -8  15 278.861 208.688  23
   4  -8  15 653.346 304.319  27
   4  -8  15 996.290 345.827  31
   4  -8  16 5086.44 673.497  27
   4  -8  16 3995.31 559.278  23
   4  -8  16 4527.98 662.746  31
   4  -8  16 3593.54 642.762  30
   4  -8  17 2645.69 427.894  23
   4  -8  17 2873.31 487.271  31
   4  -8  17 3341.09 558.603  30
   4  -8  18 4232.42 494.049  23
   4  -8  18 3243.20 523.983  30
   4  -8  19 331.191 153.109  23
   4  -8  19 65.4814 89.6783  34
  -4   7  16 126.734 151.146  21
  -4   7  15 11909.4 840.406  36
  -4   7  15 13298.6 1070.72  21
  -4   7  14 793.550 212.940  36
  -4   7  14 1267.31 361.405  21
   4  -7 -14 665.619 277.016   7
  -4   7  13 13242.3 995.030  36
  -4   7  13 14475.6 1277.88  21
   4  -7 -13 13180.8 1227.27   7
  -4   7  12 1370.46 313.898  36
   4  -7 -12 1060.04 405.284   7
  -4   7  11 45305.6 2453.25  36
   4  -7 -11 49418.3 2959.32   7
  -4   7  10 650.039 237.062  36
  -4   7  10 877.533 305.143  16
   4  -7 -10 1049.09 422.756   7
  -4   7   9 21575.6 1480.78  36
   4  -7  -9 21988.7 1859.68   7
  -4   7   9 24937.0 1658.85  16
  -4   7   8 18159.7 1371.56  16
  -4   7   8 18557.7 1539.82   1
   4  -7  -8 16679.4 1607.90   7
  -4   7   7 50087.4 2175.18  38
  -4   7   7 61581.2 2925.11  16
  -4   7   7 57772.3 3121.96   1
   4  -7  -7 61378.7 3408.05   7
   4  -7  -7 55091.2 4086.14   9
  -4   7   6 7345.34 443.242  38
  -4   7   6 8205.13 830.524  16
  -4   7   6 9144.45 1009.82   1
  -4   7   6 7033.89 458.668  11
   4  -7  -6 10410.2 1185.03   7
   4  -7  -6 9316.57 1530.98   9
  -4   7   5 69167.0 2813.79  38
  -4   7   5 70609.0 3358.22  16
  -4   7   5 64898.6 2822.37  11
   4  -7  -5 78319.0 4041.19   7
   4  -7  -5 75710.5 4983.08   9
  -4   7   5 73845.1 3697.07   1
  -4   7   4 5483.44 368.142  38
  -4   7   4 6532.57 835.624   1
   4  -7  -4 3661.90 981.191   4
  -4   7   4 5117.05 374.412  11
   4  -7  -4 5693.30 1252.57   9
   4  -7  -4 6322.24 929.624   7
  -4   7   3 17025.0 845.527  38
  -4   7   3 17691.3 899.579  15
  -4   7   3 19005.8 1470.65   1
   4  -7  -3 18332.1 1626.79   7
   4  -7  -3 19654.5 2259.05   9
  -4   7   2 4322.89 319.591  38
  -4   7   2 4647.38 356.323  15
   4  -7  -2 2932.96 868.708   4
  -4   7   2 3979.39 637.639   1
   4  -7  -2 3420.00 967.901   9
   4  -7  -2 4014.92 742.977   7
  -4   7   1 7419.38 452.980  38
  -4   7   1 7502.93 480.759  15
   4  -7  -1 6722.96 966.007   7
   4  -7  -1 8461.53 1435.02   9
   4  -7  -1 5707.50 1205.42   4
  -4   7   1 7643.80 872.254   1
  -4   7   0 5226.79 373.591  15
   4  -7   0 4974.76 827.212   7
   4  -7   0 5775.11 1167.59   9
   4  -7   0 3499.15 965.231   4
  -4   7  -1 27135.6 1195.01  15
   4  -7   1 24185.1 1988.52   7
   4  -7   1 29888.1 2759.47   9
  -4   7  -2 236.903 90.7865  15
   4  -7   2 105.386 322.335   9
   4  -7   2 325.371 392.458   4
  -4   7  -3 4478.97 319.732  15
   4  -7   3 2602.83 841.679   4
   4  -7   4 3376.98 929.217   4
   4  -7   4 3338.99 755.410   7
   4  -7   4 5322.44 1167.49   9
   4  -7   5 550.755 353.444   7
  -4   7  -5 773.575 128.567  38
   4  -7   6 17661.1 2192.44   9
   4  -7   6 16564.7 1755.39   7
  -4   7  -6 20191.8 931.846  38
   4  -7   7 9052.54 1604.79   9
   4  -7   7 7963.25 1198.02   7
  -4   7  -7 10994.9 573.685  38
  -4   7  -8 79691.8 3201.54  11
   4  -7   8 69434.1 5092.82   9
   4  -7   8 87961.9 3926.23  33
   4  -7   8 69168.4 3743.11  23
  -4   7  -8 79221.3 3192.00  38
  -4   7  -9 24943.5 1108.61  11
   4  -7   9 19847.6 2414.98   9
   4  -7   9 21509.5 1590.36  23
  -4   7  -9 23573.8 1092.45  38
   4  -7  10 60293.4 2961.58  33
   4  -7  10 54460.0 3065.82  31
   4  -7  10 50716.6 2853.32  23
   4  -7  11 32998.8 2016.41  33
   4  -7  11 33851.1 2177.95  31
   4  -7  11 27227.6 1922.58  23
   4  -7  12 35577.1 2146.35  33
   4  -7  12 35404.2 2309.27  31
   4  -7  12 31675.2 2118.06  23
   4  -7  12 37640.3 3548.60   6
   4  -7  13 9912.93 1000.82  33
   4  -7  13 10890.5 1169.98  31
   4  -7  13 9967.70 1033.23  23
   4  -7  13 12721.1 1932.73   6
   4  -7  14 31532.9 3040.31   6
   4  -7  14 25146.7 1726.78  33
   4  -7  14 25931.9 1916.50  31
   4  -7  14 24302.5 1755.49  23
   4  -7  14 25130.3 1942.66  27
   4  -7  15 27392.3 1966.41  31
   4  -7  15 26561.9 1800.67  23
   4  -7  15 26558.3 1969.91  27
   4  -7  16 10985.4 1140.74  31
   4  -7  16 10386.5 1161.40  30
   4  -7  16 11595.6 1136.93  27
   4  -7  16 10658.0 1031.75  23
   4  -7  17 8227.74 925.173  31
   4  -7  17 6640.49 899.386  30
   4  -7  17 8478.46 906.805  27
   4  -7  17 8068.72 824.874  23
   4  -7  18 1902.92 456.088  31
   4  -7  18 1825.61 368.336  23
   4  -7  19 1223.86 281.944  34
   4  -7  19 1626.86 323.300  23
   4  -7  20 1892.64 304.697  34
  -4   6  18 314.337 114.391  37
  -4   6  18 180.560 141.774  21
  -4   6  17 549.417 229.552  21
  -4   6  16 2411.68 366.984  36
  -4   6  16 1910.18 442.635  21
  -4   6  15 985.293 383.943  14
  -4   6  15 1331.17 302.644  36
  -4   6  15 736.635 347.795  21
   4  -6 -14 9388.37 986.304   7
  -4   6  14 9956.75 866.765  36
  -4   6  14 8842.47 1028.84  21
   4  -6 -13 1307.43 411.359   7
  -4   6  13 1368.47 320.316  36
   4  -6 -12 10293.2 1125.00   7
  -4   6  12 8994.94 873.184  36
   4  -6 -11 25979.5 1916.43   7
  -4   6  11 20652.6 1483.88  36
  -4   6  11 25844.5 1731.22  16
  -4   6  11 21437.0 1677.46  20
  -4   6  10 13552.2 1121.11  36
  -4   6  10 15988.1 1291.66  16
  -4   6  10 15536.7 1331.27  20
  -4   6  10 11827.0 1241.19   1
   4  -6 -10 15801.3 1482.16   7
  -4   6   9 34950.1 2146.28  16
  -4   6   9 34454.4 2301.27   1
   4  -6  -9 36493.5 2447.57   7
  -4   6   8 53927.6 2881.97  16
   4  -6  -8 57931.7 3263.61   7
  -4   6   8 51032.7 3056.35   1
  -4   6   7 89743.9 3731.53  38
  -4   6   7 99670.3 4448.16  16
   4  -6  -7 91216.3 5595.37   9
   4  -6  -7 107920. 4955.66   7
  -4   6   7 94174.7 3767.48  11
  -4   6   7 107503. 4753.75   1
  -4   6   6 30575.3 1338.42  38
  -4   6   6 30022.3 1359.77  11
   4  -6  -6 33956.7 2254.87   7
   4  -6  -6 28608.7 2696.77   9
  -4   6   6 31840.8 1878.44  16
  -4   6   6 35844.2 2139.90   1
  -4   6   5 79004.9 3314.38  11
   4  -6  -5 87559.3 4318.53   7
   4  -6  -5 84899.8 5199.25   9
  -4   6   5 84343.5 3850.75  16
  -4   6   5 89761.4 4157.42   1
  -4   6   4 16898.1 819.669  11
   4  -6  -4 16348.6 1459.69   7
   4  -6  -4 19830.3 2117.20   9
  -4   6   4 18417.1 1384.71   1
   4  -6  -3 45500.5 2666.45   7
   4  -6  -3 46686.8 3450.90   9
  -4   6   3 43302.2 1832.64  15
  -4   6   3 45163.8 2468.52   1
   4  -6  -2 79626.3 4039.92   7
   4  -6  -2 82960.8 4963.40   9
  -4   6   2 79286.2 3133.53  15
  -4   6   2 79425.3 3797.23   1
   4  -6  -1 5512.31 801.385   7
   4  -6  -1 7257.26 1242.56   9
  -4   6   1 6817.65 412.328  15
   4  -6   0 73723.9 4489.47   9
  -4   6   0 68850.7 2701.22  15
   4  -6   1 3481.65 639.794   7
   4  -6   1 3575.18 891.806   9
  -4   6  -1 4587.30 310.930  15
   4  -6   1 2594.20 766.262   4
   4  -6   2 8323.73 1024.26   7
  -4   6  -2 10003.6 523.040  15
   4  -6   2 7076.41 1242.05   4
   4  -6   3 1789.06 660.029   4
   4  -6   4 37541.5 3142.14   9
   4  -6   5 73266.7 4573.75   9
   4  -6   5 58171.1 3593.69   7
   4  -6   6 1852.74 549.076   7
   4  -6   6 1363.06 611.430   9
   4  -6   7 11959.0 1032.14  23
  -4   6  -7 14427.9 683.011  11
   4  -6   7 13282.1 1791.00   9
   4  -6   7 10002.3 1294.41   7
  -4   6  -8 5815.87 356.717  11
   4  -6   8 3660.23 994.307   9
   4  -6   8 5667.64 655.360  33
   4  -6   8 5493.26 753.657  31
   4  -6   8 5454.37 662.007  23
   4  -6   9 1805.08 708.676   9
  -4   6  -9 1458.20 155.207  11
   4  -6   9 1157.57 377.884  31
   4  -6   9 1254.65 311.599  33
   4  -6   9 1072.01 315.569  23
  -4   6  -9 1249.46 144.004  38
   4  -6  10 3825.08 1014.54   9
   4  -6  10 5925.05 683.639  33
   4  -6  10 5086.39 759.302  31
   4  -6  10 4423.81 643.164  23
   4  -6  11 30515.1 1905.44  33
   4  -6  11 33038.4 2165.77  31
   4  -6  11 26497.7 1882.42  23
   4  -6  11 35539.0 3433.45   6
   4  -6  12 693.888 327.760  31
   4  -6  12 914.082 299.144  33
   4  -6  12 643.791 283.033  23
   4  -6  12 1555.08 797.568   6
   4  -6  13 35357.0 2192.86  33
   4  -6  13 39592.9 2511.88  31
   4  -6  13 35260.7 2149.98  24
   4  -6  13 33347.5 2201.35  23
   4  -6  14 2165.22 547.045  31
   4  -6  14 1963.56 424.929  33
   4  -6  14 1767.17 445.829  23
   4  -6  14 1987.08 424.312  24
   4  -6  14 1735.88 547.324  27
   4  -6  14 1906.93 856.615   6
   4  -6  15 36126.5 3339.98   6
   4  -6  15 34864.8 2330.76  31
   4  -6  15 29589.5 2306.88  30
   4  -6  15 35419.3 2348.10  27
   4  -6  15 31601.5 2095.29  23
   4  -6  16 2205.86 563.814  30
   4  -6  16 2496.16 577.782  31
   4  -6  16 1848.63 445.293  23
   4  -6  16 2363.06 550.366  27
   4  -6  17 22536.1 1834.56  30
   4  -6  17 23425.6 1794.48  31
   4  -6  17 23142.9 1639.43  23
   4  -6  17 27353.7 1838.36  27
   4  -6  18 1309.27 432.094  31
   4  -6  18 1430.07 374.167  23
   4  -6  18 2243.50 460.789  27
   4  -6  19 24903.1 1657.90  31
   4  -6  19 24129.2 1505.47  23
   4  -6  20 778.925 278.546  30
   4  -6  20 429.119 166.708  34
   4  -6  21 10252.2 813.826  30
  -4   5  19 865.791 196.042  37
  -4   5  19 852.599 261.664  21
  -4   5  18 13581.3 1117.02  21
  -4   5  17 3138.51 445.530  36
  -4   5  17 3384.54 589.699  21
  -4   5  16 1675.81 491.883  14
  -4   5  16 805.137 250.012  36
  -4   5  16 1212.29 415.045  21
  -4   5  15 9822.73 1218.28  14
  -4   5  15 10027.4 903.015  36
  -4   5  15 9015.46 1069.81  21
  -4   5  14 283.640 181.569  36
  -4   5  14 107.369 293.731  21
  -4   5  14 152.291 240.581  20
  -4   5  13 9226.15 881.030  36
  -4   5  13 8244.29 1010.21  20
  -4   5  13 6532.40 790.390  25
  -4   5  12 2155.16 415.979  36
  -4   5  12 1524.53 424.750  16
  -4   5  12 2424.55 550.141  20
   4  -5 -12 2519.63 548.596   7
  -4   5  12 2344.80 473.655  25
  -4   5  11 10711.7 989.671  36
  -4   5  11 12037.1 1122.97  16
  -4   5  11 13181.6 1281.66  20
  -4   5  11 13806.6 1044.88  25
  -4   5  11 11234.6 1215.63   1
  -4   5  10 26710.1 1986.55   1
  -4   5  10 28379.8 1842.44  16
  -4   5   9 773.121 344.538   1
  -4   5   9 755.559 293.649  16
  -4   5   8 70436.5 2920.30  38
  -4   5   8 81787.1 3676.67  16
  -4   5   8 78552.6 3890.36   1
  -4   5   8 74679.4 2955.09  11
  -4   5   7 519.194 222.546  16
  -4   5   7 542.997 274.467   1
  -4   5   7 443.179 93.4911  11
  -4   5   6 109576. 4833.82  16
   4  -5  -6 112780. 5166.77   7
  -4   5   6 105757. 4278.75  11
  -4   5   6 113843. 5079.73   1
  -4   5   5 178.311 73.5559  11
   4  -5  -5 126.057 207.266   7
  -4   5   5 222.884 183.264   1
  -4   5   4 154784. 6070.66  11
   4  -5  -3 2407.73 186.217  32
   4  -5  -2 183640. 7218.58  32
  -4   5   2 189506. 7274.94  15
   4  -5  -1 248.490 63.2934  32
  -4   5   1 335.860 90.0258  15
   4  -5   0 72607.7 2890.39  32
   4  -5   1 2469.75 187.175  32
   4  -5   3 7376.97 394.641  32
   4  -5   4 46580.4 1905.67  32
   4  -5   5 4784.93 292.255  32
  -4   5  -6 39396.3 1648.49  11
  -4   5  -7 31386.0 1340.86  11
  -4   5  -8 6421.00 357.103  11
   4  -5   8 5007.26 635.712  23
   4  -5   8 5884.71 629.556  33
   4  -5   8 5534.76 745.169  31
   4  -5   9 12815.3 1813.77   9
  -4   5  -9 17798.5 792.970  11
   4  -5   9 17299.2 1228.79  33
   4  -5   9 17762.7 1437.34  31
   4  -5   9 14247.8 1210.48  23
   4  -5  10 12691.4 1035.73  33
   4  -5  10 12186.6 1208.72  31
   4  -5  10 11269.1 1056.46  23
   4  -5  11 1228.44 398.450  31
   4  -5  11 1146.56 305.331  33
   4  -5  11 1045.99 328.523  23
   4  -5  11 2194.25 880.685   6
   4  -5  12 4973.07 655.893  33
   4  -5  12 6536.53 878.699  31
   4  -5  12 4767.01 689.734  23
   4  -5  12 7635.32 1548.24   6
   4  -5  13 1283.36 439.331  31
   4  -5  13 630.841 254.676  33
   4  -5  13 925.203 331.345  23
   4  -5  13 879.735 394.033  27
   4  -5  13 599.835 305.919  24
   4  -5  13 1006.62 681.811   6
   4  -5  14 40548.5 3722.81   6
   4  -5  14 38414.5 2271.01  24
   4  -5  14 33197.4 2215.67  23
   4  -5  14 38979.5 2576.99  27
   4  -5  14 31409.9 2412.17  30
   4  -5  14 37627.5 2484.81  31
   4  -5  15 9514.87 1130.98  27
   4  -5  15 10148.0 985.728  24
   4  -5  15 8878.35 997.376  23
   4  -5  15 9615.01 1142.22  31
   4  -5  15 7771.60 1065.77  30
   4  -5  16 19637.6 1649.76  27
   4  -5  16 20066.8 1432.52  24
   4  -5  16 18082.4 1470.20  23
   4  -5  16 16249.8 1605.85  30
   4  -5  16 18493.2 1629.62  31
   4  -5  17 17147.6 1381.06  23
   4  -5  17 17224.3 1486.40  27
   4  -5  17 15712.3 1519.20  30
   4  -5  17 17959.9 1554.50  31
   4  -5  18 20092.1 1538.51  34
   4  -5  18 24681.9 1723.96  27
   4  -5  18 24933.6 1812.04  31
   4  -5  18 21822.3 1567.42  23
   4  -5  19 5441.11 664.309  34
   4  -5  19 6583.49 724.058  28
   4  -5  19 6690.21 845.678  31
   4  -5  19 7585.04 790.465  23
   4  -5  20 12145.9 977.530  34
   4  -5  20 16588.9 1265.30  30
   4  -5  21 84.8363 149.791  30
  -4   4  20 5072.20 483.447  37
  -4   4  20 4990.88 596.093  21
  -4   4  19 11150.4 850.675  37
  -4   4  19 11499.6 1031.12  21
  -4   4  18 1021.71 374.750  21
  -4   4  17 8313.05 810.742  36
  -4   4  17 10057.2 1070.00  21
  -4   4  17 6684.71 913.978  20
  -4   4  17 8896.56 1075.45  14
  -4   4  16 11784.6 1019.24  36
  -4   4  16 11741.0 1213.95  21
  -4   4  16 11696.2 1325.31  14
  -4   4  16 10279.8 1186.16  20
  -4   4  15 12505.5 1032.48  36
  -4   4  15 13822.8 1315.58  21
  -4   4  15 12548.3 1289.31  20
  -4   4  15 14149.1 1464.17  14
  -4   4  14 12793.8 1097.55  36
  -4   4  14 13386.3 1350.33  21
  -4   4  14 12959.5 1369.21  20
  -4   4  14 15046.9 1264.00  25
  -4   4  13 3760.94 559.673  36
  -4   4  13 3511.29 690.928  21
  -4   4  13 5312.86 840.703  20
  -4   4  13 5503.03 734.169  25
  -4   4  12 6891.47 765.016  36
  -4   4  12 7809.73 1009.87  20
  -4   4  12 8225.45 880.863  16
  -4   4  12 5386.84 853.751   1
  -4   4  12 8578.52 855.070  25
  -4   4  11 35616.4 2102.61  36
  -4   4  11 39936.5 2281.42  16
  -4   4  11 34185.5 2424.07   1
  -4   4  11 40088.6 2145.11  25
  -4   4  10 8517.11 877.708  16
  -4   4  10 8343.19 991.246   1
  -4   4  10 8862.05 806.013  25
  -4   4   9 67520.5 3262.78  16
  -4   4   9 70095.5 3541.46   1
  -4   4   9 62351.8 2576.85  11
  -4   4   9 69549.4 3096.31  25
  -4   4   8 3900.63 531.625  16
  -4   4   8 3787.47 258.937  11
  -4   4   8 4064.23 634.042   1
   4  -4  -7 69337.2 2769.14  32
  -4   4   7 70476.1 2810.49  11
   4  -4  -6 24236.2 985.668  32
  -4   4   6 23718.0 1022.38  11
  -4   4   6 21527.8 958.926   2
  -4   4   5 88799.9 3498.68  11
   4  -4  -5 87094.9 3454.99  32
  -4   4   4 47903.6 1978.62  11
   4  -4  -4 48178.1 1940.52  32
  -4   4   3 26038.6 1154.29  11
   4  -4  -3 27218.1 1125.59  32
  -4   4   2 41240.1 1745.30  11
   4  -4  -2 42801.1 1713.82  32
   4  -4  -1 23864.2 1012.77  32
  -4   4   0 217656. 8850.30  11
   4  -4   0 238661. 8832.38  32
  -4   4  -1 136181. 5434.97  11
   4  -4   1 141765. 5410.87  32
  -4   4  -2 83000.6 3293.35  11
  -4   4  -3 631.354 97.9945  11
   4  -4   3 731.992 89.7190  32
  -4   4  -4 5449.54 324.688  11
   4  -4   4 5904.48 314.213  32
  -4   4  -5 35699.9 1489.82  11
   4  -4   5 35843.4 1470.03  32
  -4   4  -6 28963.6 1225.54  11
   4  -4   6 28817.1 1207.72  32
  -4   4  -7 43457.9 1743.43  11
   4  -4   7 40718.9 2122.73  33
   4  -4   7 41756.6 1720.31  32
  -4   4  -8 47724.3 1886.60  11
   4  -4   8 43120.7 2302.63  33
   4  -4   8 45322.0 1865.10  32
  -4   4  -9 13229.1 610.237  11
   4  -4   9 12023.6 1032.29  23
   4  -4   9 11875.3 959.263  33
   4  -4   9 13102.0 1191.07  31
   4  -4  10 28373.6 2889.23   6
   4  -4  10 24535.2 1627.66  23
   4  -4  10 22414.9 1485.44  33
   4  -4  10 23122.2 1731.57  31
   4  -4  11 44518.4 2626.21  26
   4  -4  11 49293.7 2731.49  23
   4  -4  11 50528.5 2633.21  33
   4  -4  11 52625.3 2978.52  31
   4  -4  12 6499.29 1461.88   6
   4  -4  12 5897.36 692.329  33
   4  -4  12 5242.60 809.449  31
   4  -4  12 5742.43 766.115  24
   4  -4  12 5322.04 688.411  26
   4  -4  12 6065.61 767.566  23
   4  -4  13 31286.1 3236.84   6
   4  -4  13 26227.2 1902.51  17
   4  -4  13 30625.3 1981.41  24
   4  -4  13 25673.9 1771.43  26
   4  -4  13 28045.2 1892.67  23
   4  -4  13 28620.2 2087.86  31
   4  -4  13 24628.2 2015.53  30
   4  -4  14 3466.13 585.660  17
   4  -4  14 4593.42 776.957  27
   4  -4  14 4562.38 686.691  24
   4  -4  14 4033.48 650.624  23
   4  -4  14 2963.44 528.380  26
   4  -4  14 2960.40 655.416  30
   4  -4  14 4639.00 772.371  31
   4  -4  15 1063.77 354.319  23
   4  -4  15 933.454 416.385  27
   4  -4  15 1026.54 358.034  24
   4  -4  15 1281.93 352.787  26
   4  -4  15 1043.00 404.259  30
   4  -4  15 811.382 373.788  31
   4  -4  16 10494.6 1106.77  23
   4  -4  16 12503.5 1145.34  24
   4  -4  16 11851.6 1316.20  30
   4  -4  16 13057.6 1319.81  27
   4  -4  16 12467.9 1301.55  31
   4  -4  17 11256.5 1112.07  34
   4  -4  17 11846.5 1142.19  23
   4  -4  18 14066.3 1217.55  34
   4  -4  18 15667.3 1170.09  29
   4  -4  18 14886.5 1261.97  23
   4  -4  19 9547.17 884.539  28
   4  -4  19 6319.63 734.414  34
   4  -4  20 10239.4 888.875  34
   4  -4  20 12608.7 1131.63  30
   4  -4  20 12868.0 981.745  28
   4  -4  21 14646.7 1117.07  30
  -4   3  21 4680.20 564.398  21
  -4   3  20 4383.10 613.141  21
  -4   3  19 2438.09 516.038  21
  -4   3  19 1793.02 476.385  20
  -4   3  18 14798.6 1374.15  14
  -4   3  18 13039.1 1264.40  21
  -4   3  18 11335.0 1259.70  20
  -4   3  17 4098.24 728.436  21
  -4   3  17 4065.28 772.559  20
  -4   3  17 3579.70 733.734  14
  -4   3  16 23441.3 1746.35  25
  -4   3  16 24285.1 1908.93  21
  -4   3  16 23644.3 1976.96  20
  -4   3  16 25828.2 2089.10  14
  -4   3  15 844.870 401.483  21
  -4   3  15 1316.30 454.662  20
  -4   3  15 514.154 243.995  22
  -4   3  15 1030.55 489.199  14
  -4   3  14 44851.0 2869.25  21
  -4   3  14 53532.1 3130.76  20
  -4   3  14 49968.7 3181.12  14
  -4   3  14 50493.4 2662.57  25
  -4   3  13 1536.03 449.582  21
  -4   3  13 1298.88 452.589  20
  -4   3  13 1020.34 429.720   1
  -4   3  13 1574.42 496.968  25
  -4   3  13 1539.40 377.664  22
  -4   3  12 132236. 6257.40  21
  -4   3  12 127864. 6422.03   1
  -4   3  12 116145. 5916.13  22
  -4   3  11 13795.8 1335.47   1
  -4   3  11 14877.9 1097.74  25
  -4   3  10 49582.1 2675.40  16
  -4   3  10 48668.6 2941.52   1
  -4   3  10 52706.5 2585.53  25
  -4   3   9 21134.3 925.783  11
[truncated: 363,551 more chars]
