# Supplementary material for: Reactions of a Dioxidomolybdenum(VI) Complex with Thionation Reagents—Formation of Mo(IV) Species with Sulfur Donors
Source: Molecules. 2022 Oct 22;27(21):7154. doi: 10.3390/molecules27217154 (PMC9655758; doi:10.3390/molecules27217154)
Supplement: Supplementary file 1 [file molecules-27-07154-s001.zip › 3.cif]

data_3
_audit_creation_date               2022-06-03
_audit_creation_method
;
Olex2 1.5
(compiled 2022.04.07 svn.rca3783a0 for OlexSys, GUI svn.r6498)
;
_shelx_SHELXL_version_number       '2018/3'
_audit_contact_author_address      ?
_audit_contact_author_email        ?
_audit_contact_author_name         ''
_audit_contact_author_phone        ?
_publ_contact_author_id_orcid      ?
_publ_section_references
;
Dolomanov, O.V., Bourhis, L.J., Gildea, R.J, Howard, J.A.K. & Puschmann, H.
 (2009), J. Appl. Cryst. 42, 339-341.

Sheldrick, G.M. (2008). Acta Cryst. A64, 112-122.

Sheldrick, G.M. (2015). Acta Cryst. C71, 3-8.
;
_chemical_name_common              ?
_chemical_name_systematic          ?
_chemical_formula_moiety           'C43 H57 Mo N2 O3 P S3, C2 H3 N1'
_chemical_formula_sum              'C45 H60 Mo N3 O3 P S3'
_chemical_formula_weight           914.05
_chemical_absolute_configuration   .
_chemical_melting_point            ?
_chemical_oxdiff_formula           C45H60MoN3O3PS3
loop_
  _atom_type_symbol
  _atom_type_description
  _atom_type_scat_dispersion_real
  _atom_type_scat_dispersion_imag
  _atom_type_scat_source
 'C' 'C' 0.0181 0.0091 'International Tables Vol C Tables 4.2.6.8 and 6.1.1.4'
 'H' 'H' 0.0000 0.0000 'International Tables Vol C Tables 4.2.6.8 and 6.1.1.4'
 'Mo' 'Mo' -0.0483 2.7339
 'International Tables Vol C Tables 4.2.6.8 and 6.1.1.4'
 'N' 'N' 0.0311 0.0180 'International Tables Vol C Tables 4.2.6.8 and 6.1.1.4'
 'O' 'O' 0.0492 0.0322 'International Tables Vol C Tables 4.2.6.8 and 6.1.1.4'
 'P' 'P' 0.2955 0.4335 'International Tables Vol C Tables 4.2.6.8 and 6.1.1.4'
 'S' 'S' 0.3331 0.5567 'International Tables Vol C Tables 4.2.6.8 and 6.1.1.4'

_shelx_space_group_comment
;
The symmetry employed for this shelxl refinement is uniquely defined
by the following loop, which should always be used as a source of
symmetry information in preference to the above space-group names.
They are only intended as comments.
;
_space_group_crystal_system        'orthorhombic'
_space_group_IT_number             18
_space_group_name_H-M_alt          'P 21 21 2'
_space_group_name_Hall             'P 2 2ab'
loop_
  _space_group_symop_operation_xyz
 'x, y, z'
 '-x, -y, z'
 'x+1/2, -y+1/2, -z'
 '-x+1/2, y+1/2, -z'

_cell_length_a                     26.8402(17)
_cell_length_b                     18.5045(15)
_cell_length_c                     9.4729(7)
_cell_angle_alpha                  90
_cell_angle_beta                   90
_cell_angle_gamma                  90
_cell_volume                       4704.8(6)
_cell_formula_units_Z              4
_cell_measurement_reflns_used      3221
_cell_measurement_temperature      125.0(1)
_cell_measurement_theta_max        69.4930
_cell_measurement_theta_min        2.8570
_shelx_estimated_absorpt_T_max     0.851
_shelx_estimated_absorpt_T_min     0.368
_exptl_absorpt_coefficient_mu      4.158
_exptl_absorpt_correction_T_max    1.000
_exptl_absorpt_correction_T_min    0.210
_exptl_absorpt_correction_type     gaussian
_exptl_absorpt_process_details
;
CrysAlisPro 1.171.41.116a (Rigaku Oxford Diffraction, 2021)
Numerical absorption correction based on gaussian integration over
a multifaceted crystal model
Empirical absorption correction using spherical harmonics,
implemented in SCALE3 ABSPACK scaling algorithm.
;
_exptl_absorpt_special_details     ?
_exptl_crystal_colour              Red
_exptl_crystal_colour_primary      Red
_exptl_crystal_density_diffrn      1.290
_exptl_crystal_density_meas        ?
_exptl_crystal_density_method      ?
_exptl_crystal_description         plank
_exptl_crystal_F_000               1920
loop_
  _exptl_crystal_face_index_h
  _exptl_crystal_face_index_k
  _exptl_crystal_face_index_l
  _exptl_crystal_face_perp_dist
 -2 12 0 0.0522
 2 -12 0 0.0343
 0 -1 -6 0.1608
 0 0 6 0.1396
 -17 -2 0 0.0190
 17 2 0 0.0171
 -17 1 0 0.0146

_exptl_crystal_size_max            0.3
_exptl_crystal_size_mid            0.09
_exptl_crystal_size_min            0.04
loop_
  _exptl_oxdiff_crystal_face_indexfrac_h
  _exptl_oxdiff_crystal_face_indexfrac_k
  _exptl_oxdiff_crystal_face_indexfrac_l
  _exptl_oxdiff_crystal_face_x
  _exptl_oxdiff_crystal_face_y
  _exptl_oxdiff_crystal_face_z
 -2.4063 11.8950 -0.0474 -0.3784 -0.4047 -0.8325
 2.4046 -11.8935 0.1095 0.3842 0.4108 0.8268
 0.2567 -0.5536 -6.1436 -0.5583 -0.5868 0.5866
 -0.1950 0.2477 6.1491 0.5684 0.5976 -0.5655
 -17.2233 -1.7818 -0.1053 -0.7264 0.6872 0.0093
 17.2233 1.7818 0.1053 0.7264 -0.6872 -0.0093
 -17.4007 0.5612 -0.0848 -0.7851 0.5997 -0.1552

_exptl_transmission_factor_max     ?
_exptl_transmission_factor_min     ?
_diffrn_reflns_av_R_equivalents    0.0836
_diffrn_reflns_av_unetI/netI       0.1003
_diffrn_reflns_Laue_measured_fraction_full  0.990
_diffrn_reflns_Laue_measured_fraction_max  0.990
_diffrn_reflns_limit_h_max         32
_diffrn_reflns_limit_h_min         -32
_diffrn_reflns_limit_k_max         22
_diffrn_reflns_limit_k_min         -21
_diffrn_reflns_limit_l_max         11
_diffrn_reflns_limit_l_min         -11
_diffrn_reflns_number              16605
_diffrn_reflns_point_group_measured_fraction_full  0.904
_diffrn_reflns_point_group_measured_fraction_max  0.903
_diffrn_reflns_theta_full          67.684
_diffrn_reflns_theta_max           68.251
_diffrn_reflns_theta_min           2.901
_diffrn_ambient_temperature        125.0(1)
_diffrn_detector                   'Hybrid Pixel Array Detector'
_diffrn_detector_area_resol_mean   10.0000
_diffrn_detector_type              HyPix
_diffrn_measured_fraction_theta_full  0.990
_diffrn_measured_fraction_theta_max  0.990
_diffrn_measurement_details
;
List of Runs (angles in degrees, time in seconds):

  # Type    Start    End  Width  t~exp~   \w     \q     \k     \f   Frames
--------------------------------------------------------------------------
  1  \w    -50.00 -20.00   1.00    5.00    --  -47.55 119.00-176.00   30
  2  \w    -91.00 -54.00   1.00    5.00    --  -47.55 119.00-176.00   37
  3  \w   -125.00 -96.00   1.00   18.00    --  -97.00 -77.00 -16.00   29
  4  \w    -54.00 -27.00   1.00   18.00    --  -97.00  45.00 -43.00   27
  5  \w     80.00 170.00   1.00   18.00    --  107.75 119.00-176.00   90
  6  \w    -29.00  28.00   1.00    5.00    --  -47.55  19.00  30.00   57
  7  \w    -28.00  28.00   1.00    5.00    --  -47.55  19.00  90.00   56
  8  \w     36.00  68.00   1.00   18.00    --  107.75 -61.00 150.00   32
  9  \w     67.00 102.00   1.00   18.00    --  107.75 -77.00 120.00   35
 10  \w     35.00  65.00   1.00   18.00    --  107.75 -61.00-180.00   30
 11  \w     91.00 174.00   1.00   18.00    --  107.75  61.00  90.00   83
 12  \w     36.00  97.00   1.00   18.00    --  107.75 -77.00 -16.00   61
;
_diffrn_measurement_device         'four-circle diffractometer'
_diffrn_measurement_device_type    'ROD, Synergy Custom system, HyPix'
_diffrn_measurement_method         '\w scans'
_diffrn_orient_matrix_type        
 'CrysAlisPro convention (1999,Acta A55,543-557)'
_diffrn_orient_matrix_UB_11        0.0439280000
_diffrn_orient_matrix_UB_12        -0.0225459000
_diffrn_orient_matrix_UB_13        0.0947352000
_diffrn_orient_matrix_UB_21        -0.0362592000
_diffrn_orient_matrix_UB_22        -0.0409706000
_diffrn_orient_matrix_UB_23        0.0976858000
_diffrn_orient_matrix_UB_31        0.0071308000
_diffrn_orient_matrix_UB_32        -0.0688980000
_diffrn_orient_matrix_UB_33        -0.0889683000
_diffrn_radiation_monochromator    mirror
_diffrn_radiation_probe            x-ray
_diffrn_radiation_type             'Cu K\a'
_diffrn_radiation_wavelength       1.54184
_diffrn_source                     'Rotating-anode X-ray tube'
_diffrn_source_type                'Rigaku (Cu) X-ray Source'
_reflns_Friedel_coverage           0.628
_reflns_Friedel_fraction_full      0.794
_reflns_Friedel_fraction_max       0.791
_reflns_number_gt                  6707
_reflns_number_total               7781
_reflns_special_details
;
 Reflections were merged by SHELXL according to the crystal
 class for the calculation of statistics and refinement.
 
 _reflns_Friedel_fraction is defined as the number of unique
 Friedel pairs measured divided by the number that would be
 possible theoretically, ignoring centric projections and
 systematic absences.
;
_reflns_threshold_expression       'I > 2\s(I)'
_computing_cell_refinement         'CrysAlisPro 1.171.41.116a (Rigaku OD, 2021)'
_computing_data_collection         'CrysAlisPro 1.171.41.116a (Rigaku OD, 2021)'
_computing_data_reduction          'CrysAlisPro 1.171.41.116a (Rigaku OD, 2021)'
_computing_molecular_graphics      'Olex2 1.5 (Dolomanov et al., 2009)'
_computing_publication_material    'Olex2 1.5 (Dolomanov et al., 2009)'
_computing_structure_refinement    'SHELXL 2018/3 (Sheldrick, 2015)'
_computing_structure_solution      'SHELXS  (Sheldrick, 2008)'
_refine_diff_density_max           1.501
_refine_diff_density_min           -1.018
_refine_diff_density_rms           0.138
_refine_ls_abs_structure_details
;
 Flack x determined using 2251 quotients [(I+)-(I-)]/[(I+)+(I-)]
 (Parsons, Flack and Wagner, Acta Cryst. B69 (2013) 249-259).
;
_refine_ls_abs_structure_Flack     -0.026(13)
_refine_ls_extinction_coef         .
_refine_ls_extinction_method       none
_refine_ls_goodness_of_fit_ref     1.060
_refine_ls_hydrogen_treatment      constr
_refine_ls_matrix_type             full
_refine_ls_number_parameters       548
_refine_ls_number_reflns           7781
_refine_ls_number_restraints       48
_refine_ls_R_factor_all            0.0705
_refine_ls_R_factor_gt             0.0585
_refine_ls_restrained_S_all        1.059
_refine_ls_shift/su_max            0.000
_refine_ls_shift/su_mean           0.000
_refine_ls_structure_factor_coef   Fsqd
_refine_ls_weighting_details      
 'w=1/[\s^2^(Fo^2^)+(0.1034P)^2^] where P=(Fo^2^+2Fc^2^)/3'
_refine_ls_weighting_scheme        calc
_refine_ls_wR_factor_gt            0.1528
_refine_ls_wR_factor_ref           0.1704
_refine_special_details            ?
_olex2_refinement_description
;
1. Fixed Uiso
 At 1.2 times of:
  All C(H) groups, All C(H,H) groups
 At 1.5 times of:
  All C(H,H,H) groups
2. Restrained distances
 C48A-C47A
 1.54 with sigma of 0.02
 C48C-C47C
 1.54 with sigma of 0.02
 C47B-C48B
 1.54 with sigma of 0.02
 N46C-C47C
 1.15 with sigma of 0.02
 N46B-C47B
 1.15 with sigma of 0.02
 N46A-C47A
 1.15 with sigma of 0.02
3. Uiso/Uaniso restraints and constraints
Uanis(O1) \\sim Ueq: with sigma of 0.002 and sigma for terminal atoms of 0.004
Uanis(N46B) \\sim Ueq, Uanis(C47B) \\sim Ueq, Uanis(C48B) \\sim Ueq: with sigma
of 0.05 and sigma for terminal atoms of 0.02
Uanis(N46C) \\sim Ueq, Uanis(C47C) \\sim Ueq, Uanis(C48C) \\sim Ueq: with sigma
of 0.05 and sigma for terminal atoms of 0.02
Uanis(N46B) = Uanis(C47B) = Uanis(C48B)
Uanis(N46C) = Uanis(C47C) = Uanis(C48C)
4. Others
 Fixed Sof: N46A(0.7) C47A(0.7) C48A(0.7) H48A(0.7) H48B(0.7) H48C(0.7)
 N46C(0.15) C47C(0.15) C48C(0.15) H48D(0.15) H48E(0.15) H48F(0.15) N46B(0.15)
 C47B(0.15) C48B(0.15) H48G(0.15) H48H(0.15) H48I(0.15)
5.a Secondary CH2 refined with riding coordinates:
 C7(H7A,H7B), C9(H9A,H9B), C32(H32A,H32B)
5.b Aromatic/amide H refined with riding coordinates:
 C5(H5), C3(H3), C11(H11), C13(H13), C37(H37), C36(H36), C35(H35), C34(H34),
 C40(H40), C41(H41), C43(H43), C44(H44)
5.c Idealised Me refined with everything fixed:
 C48A(H48A,H48B,H48C), C48C(H48D,H48E,H48F), C48B(H48G,H48H,H48I)
5.d Idealised Me refined as rotating group:
 C17(H17A,H17B,H17C), C18(H18A,H18B,H18C), C19(H19A,H19B,H19C), C21(H21A,H21B,
 H21C), C22(H22A,H22B,H22C), C23(H23A,H23B,H23C), C27(H27A,H27B,H27C), C25(H25A,
 H25B,H25C), C26(H26A,H26B,H26C), C29(H29A,H29B,H29C), C30(H30A,H30B,H30C),
 C31(H31A,H31B,H31C), C45(H45A,H45B,H45C)
;
_atom_sites_solution_hydrogens     geom
_atom_sites_solution_primary       direct
_atom_sites_solution_secondary     ?
loop_
  _atom_site_label
  _atom_site_type_symbol
  _atom_site_fract_x
  _atom_site_fract_y
  _atom_site_fract_z
  _atom_site_U_iso_or_equiv
  _atom_site_adp_type
  _atom_site_occupancy
  _atom_site_site_symmetry_order
  _atom_site_calc_flag
  _atom_site_refinement_flags_posn
  _atom_site_refinement_flags_adp
  _atom_site_refinement_flags_occupancy
  _atom_site_disorder_assembly
  _atom_site_disorder_group
 Mo1 Mo 0.22480(3) 0.44480(3) 0.56505(6) 0.0209(2) Uani 1 1 d . . . . .
 S2 S 0.18644(8) 0.45323(11) 0.33940(19) 0.0244(4) Uani 1 1 d . . . . .
 S1 S 0.21202(8) 0.57160(10) 0.5556(2) 0.0248(4) Uani 1 1 d . . . . .
 S3 S 0.22009(10) 0.61946(11) 0.2032(2) 0.0298(5) Uani 1 1 d . . . . .
 P1 P 0.18362(9) 0.56644(12) 0.3493(2) 0.0242(5) Uani 1 1 d . . . . .
 O1 O 0.1670(2) 0.4168(3) 0.6673(6) 0.0231(12) Uani 1 1 d . U . . .
 O2 O 0.2897(2) 0.4446(3) 0.4894(6) 0.0276(13) Uani 1 1 d . . . . .
 O3 O -0.0298(3) 0.6578(4) 0.3425(8) 0.0410(17) Uani 1 1 d . . . . .
 N38 N 0.2608(3) 0.4318(4) 0.7766(7) 0.0209(14) Uani 1 1 d . . . . .
 N8 N 0.2444(3) 0.3245(4) 0.5760(8) 0.0244(15) Uani 1 1 d . . . . .
 C1 C 0.1564(4) 0.3668(5) 0.7676(9) 0.0259(19) Uani 1 1 d . . . . .
 C5 C 0.1716(4) 0.2444(5) 0.8484(9) 0.029(2) Uani 1 1 d . . . . .
 H5 H 0.184530 0.197324 0.831951 0.035 Uiso 1 1 calc R U . . .
 C2 C 0.1291(4) 0.3832(5) 0.8906(9) 0.028(2) Uani 1 1 d . . . . .
 C3 C 0.1269(4) 0.3275(5) 0.9920(9) 0.030(2) Uani 1 1 d . . . . .
 H3 H 0.109063 0.336821 1.076720 0.036 Uiso 1 1 calc R U . . .
 C4 C 0.1489(4) 0.2599(5) 0.9768(9) 0.032(2) Uani 1 1 d . . . . .
 C6 C 0.1755(4) 0.2957(5) 0.7461(8) 0.0248(19) Uani 1 1 d . . . . .
 C7 C 0.1991(3) 0.2800(5) 0.6033(9) 0.027(2) Uani 1 1 d . . . . .
 H7A H 0.208188 0.228176 0.598820 0.033 Uiso 1 1 calc R U . . .
 H7B H 0.174281 0.289406 0.528201 0.033 Uiso 1 1 calc R U . . .
 C9 C 0.2648(3) 0.2990(4) 0.4367(9) 0.0241(18) Uani 1 1 d . . . . .
 H9A H 0.240558 0.310960 0.361448 0.029 Uiso 1 1 calc R U . . .
 H9B H 0.268270 0.245767 0.439538 0.029 Uiso 1 1 calc R U . . .
 C10 C 0.3147(3) 0.3319(5) 0.3993(8) 0.0221(18) Uani 1 1 d . . . . .
 C11 C 0.3513(4) 0.2904(5) 0.3314(9) 0.029(2) Uani 1 1 d . . . . .
 H11 H 0.344753 0.240750 0.314162 0.034 Uiso 1 1 calc R U . . .
 C12 C 0.3958(4) 0.3184(5) 0.2891(9) 0.031(2) Uani 1 1 d . . . . .
 C13 C 0.4051(4) 0.3912(5) 0.3214(9) 0.029(2) Uani 1 1 d . . . . .
 H13 H 0.436281 0.411206 0.294636 0.035 Uiso 1 1 calc R U . . .
 C14 C 0.3709(4) 0.4359(5) 0.3907(9) 0.0291(19) Uani 1 1 d . . . . .
 C15 C 0.3250(3) 0.4038(4) 0.4253(8) 0.0215(17) Uani 1 1 d . . . . .
 C32 C 0.2818(4) 0.3114(4) 0.6879(8) 0.0242(19) Uani 1 1 d . . . . .
 H32A H 0.315597 0.314283 0.646220 0.029 Uiso 1 1 calc R U . . .
 H32B H 0.277305 0.261970 0.725759 0.029 Uiso 1 1 calc R U . . .
 C33 C 0.2779(4) 0.3650(4) 0.8072(8) 0.0233(17) Uani 1 1 d . . . . .
 C37 C 0.2614(4) 0.4813(5) 0.8792(8) 0.0268(19) Uani 1 1 d . . . . .
 H37 H 0.250235 0.528738 0.857250 0.032 Uiso 1 1 calc R U . . .
 C36 C 0.2771(4) 0.4678(5) 1.0141(9) 0.037(2) Uani 1 1 d . . . . .
 H36 H 0.276292 0.504518 1.084125 0.044 Uiso 1 1 calc R U . . .
 C35 C 0.2938(4) 0.4001(6) 1.0451(10) 0.043(3) Uani 1 1 d . . . . .
 H35 H 0.305016 0.389177 1.137816 0.052 Uiso 1 1 calc R U . . .
 C34 C 0.2945(4) 0.3471(5) 0.9417(9) 0.034(2) Uani 1 1 d . . . . .
 H34 H 0.305995 0.299692 0.962274 0.041 Uiso 1 1 calc R U . . .
 C16 C 0.1016(3) 0.4542(5) 0.9113(8) 0.0259(18) Uani 1 1 d . . . . .
 C17 C 0.0717(4) 0.4563(5) 1.0502(9) 0.030(2) Uani 1 1 d . . . . .
 H17A H 0.094661 0.453361 1.130505 0.046 Uiso 1 1 calc R U . . .
 H17B H 0.048597 0.415366 1.053063 0.046 Uiso 1 1 calc R U . . .
 H17C H 0.052868 0.501619 1.055460 0.046 Uiso 1 1 calc R U . . .
 C18 C 0.1380(4) 0.5185(5) 0.9143(10) 0.032(2) Uani 1 1 d . . . . .
 H18A H 0.119673 0.562850 0.937092 0.047 Uiso 1 1 calc R U . . .
 H18B H 0.153795 0.523698 0.821576 0.047 Uiso 1 1 calc R U . . .
 H18C H 0.163606 0.510026 0.986057 0.047 Uiso 1 1 calc R U . . .
 C19 C 0.0642(4) 0.4639(6) 0.7878(9) 0.036(2) Uani 1 1 d . . . . .
 H19A H 0.040546 0.423659 0.787631 0.054 Uiso 1 1 calc R U . . .
 H19B H 0.082425 0.464768 0.698126 0.054 Uiso 1 1 calc R U . . .
 H19C H 0.046154 0.509534 0.799771 0.054 Uiso 1 1 calc R U . . .
 C20 C 0.1481(5) 0.2037(5) 1.0951(10) 0.044(3) Uani 1 1 d . . . . .
 C21 C 0.2028(6) 0.1814(8) 1.1255(13) 0.074(5) Uani 1 1 d . . . . .
 H21A H 0.203464 0.146285 1.202984 0.111 Uiso 1 1 calc R U . . .
 H21B H 0.222104 0.224191 1.152085 0.111 Uiso 1 1 calc R U . . .
 H21C H 0.217271 0.159550 1.040693 0.111 Uiso 1 1 calc R U . . .
 C22 C 0.1303(6) 0.2346(6) 1.2346(10) 0.056(4) Uani 1 1 d . . . . .
 H22A H 0.095409 0.249619 1.225721 0.084 Uiso 1 1 calc R U . . .
 H22B H 0.150792 0.276524 1.259698 0.084 Uiso 1 1 calc R U . . .
 H22C H 0.133169 0.197746 1.308340 0.084 Uiso 1 1 calc R U . . .
 C23 C 0.1210(9) 0.1374(8) 1.0505(15) 0.109(8) Uani 1 1 d . . . . .
 H23A H 0.136434 0.117882 0.964765 0.164 Uiso 1 1 calc R U . . .
 H23B H 0.086106 0.149337 1.031325 0.164 Uiso 1 1 calc R U . . .
 H23C H 0.122713 0.101219 1.125915 0.164 Uiso 1 1 calc R U . . .
 C24 C 0.4370(4) 0.2736(6) 0.2135(12) 0.044(3) Uani 1 1 d . . . . .
 C27 C 0.4509(6) 0.3108(7) 0.0749(14) 0.072(4) Uani 1 1 d . . . . .
 H27A H 0.421040 0.316233 0.016198 0.108 Uiso 1 1 calc R U . . .
 H27B H 0.475578 0.281546 0.024597 0.108 Uiso 1 1 calc R U . . .
 H27C H 0.464936 0.358625 0.095027 0.108 Uiso 1 1 calc R U . . .
 C25 C 0.4830(5) 0.2697(8) 0.3071(19) 0.072(4) Uani 1 1 d . . . . .
 H25A H 0.496076 0.318557 0.322183 0.108 Uiso 1 1 calc R U . . .
 H25B H 0.508400 0.239919 0.261160 0.108 Uiso 1 1 calc R U . . .
 H25C H 0.473997 0.248268 0.398175 0.108 Uiso 1 1 calc R U . . .
 C26 C 0.4195(5) 0.1978(6) 0.1786(14) 0.055(3) Uani 1 1 d . . . . .
 H26A H 0.410050 0.172782 0.265742 0.082 Uiso 1 1 calc R U . . .
 H26B H 0.446569 0.171228 0.132234 0.082 Uiso 1 1 calc R U . . .
 H26C H 0.390730 0.200274 0.115210 0.082 Uiso 1 1 calc R U . . .
 C28 C 0.3826(4) 0.5155(5) 0.4254(10) 0.0306(19) Uani 1 1 d . . . . .
 C29 C 0.3805(5) 0.5260(6) 0.5865(11) 0.046(3) Uani 1 1 d . . . . .
 H29A H 0.346705 0.515655 0.620358 0.070 Uiso 1 1 calc R U . . .
 H29B H 0.389231 0.576031 0.609797 0.070 Uiso 1 1 calc R U . . .
 H29C H 0.404111 0.493059 0.632001 0.070 Uiso 1 1 calc R U . . .
 C30 C 0.4335(4) 0.5380(6) 0.3734(16) 0.058(4) Uani 1 1 d . . . . .
 H30A H 0.459171 0.511741 0.426114 0.087 Uiso 1 1 calc R U . . .
 H30B H 0.437844 0.590055 0.387567 0.087 Uiso 1 1 calc R U . . .
 H30C H 0.436494 0.526703 0.272629 0.087 Uiso 1 1 calc R U . . .
 C31 C 0.3440(4) 0.5655(5) 0.3567(11) 0.041(2) Uani 1 1 d . . . . .
 H31A H 0.344698 0.559020 0.254036 0.061 Uiso 1 1 calc R U . . .
 H31B H 0.351838 0.615874 0.379722 0.061 Uiso 1 1 calc R U . . .
 H31C H 0.310693 0.553619 0.392404 0.061 Uiso 1 1 calc R U . . .
 C39 C 0.1192(4) 0.5949(5) 0.3517(9) 0.032(2) Uani 1 1 d . . . . .
 C40 C 0.0870(4) 0.5745(6) 0.4606(11) 0.043(3) Uani 1 1 d . . . . .
 H40 H 0.099840 0.546538 0.536437 0.051 Uiso 1 1 calc R U . . .
 C41 C 0.0373(4) 0.5934(6) 0.4618(11) 0.041(3) Uani 1 1 d . . . . .
 H41 H 0.016358 0.578517 0.537129 0.050 Uiso 1 1 calc R U . . .
 C42 C 0.0184(4) 0.6346(6) 0.3515(10) 0.034(2) Uani 1 1 d . . . . .
 C43 C 0.0493(4) 0.6563(6) 0.2422(10) 0.040(2) Uani 1 1 d . . . . .
 H43 H 0.036310 0.684551 0.167033 0.048 Uiso 1 1 calc R U . . .
 C44 C 0.0991(4) 0.6369(6) 0.2424(10) 0.036(2) Uani 1 1 d . . . . .
 H44 H 0.120000 0.652279 0.167243 0.043 Uiso 1 1 calc R U . . .
 C45 C -0.0636(4) 0.6326(7) 0.4471(13) 0.049(3) Uani 1 1 d . . . . .
 H45A H -0.097292 0.649649 0.424894 0.074 Uiso 1 1 calc R U . . .
 H45B H -0.053575 0.651026 0.539742 0.074 Uiso 1 1 calc R U . . .
 H45C H -0.063320 0.579615 0.448535 0.074 Uiso 1 1 calc R U . . .
 N46A N 0.4010(8) 0.3372(16) 0.717(3) 0.109(8) Uani 0.7 1 d D . P A 1
 C47A C 0.4426(9) 0.3448(12) 0.700(2) 0.075(7) Uani 0.7 1 d D . P A 1
 C48A C 0.4969(9) 0.3543(15) 0.683(3) 0.093(8) Uani 0.7 1 d D . P A 1
 H48A H 0.508892 0.322492 0.607613 0.139 Uiso 0.7 1 calc . U P B 1
 H48B H 0.513680 0.341897 0.771684 0.139 Uiso 0.7 1 calc . U P C 1
 H48C H 0.504105 0.404644 0.658634 0.139 Uiso 0.7 1 calc . U P D 1
 N46C N 0.484(3) 0.485(6) 0.862(10) 0.083(17) Uani 0.15 1 d D U P E -2
 C47C C 0.450(3) 0.481(6) 0.936(12) 0.083(17) Uani 0.15 1 d D U P E -2
 C48C C 0.395(3) 0.470(6) 0.977(11) 0.083(17) Uani 0.15 1 d D U P E -2
 H48D H 0.391855 0.473369 1.079540 0.124 Uiso 0.15 1 calc . U P F -2
 H48E H 0.384052 0.422215 0.945130 0.124 Uiso 0.15 1 calc . U P G -2
 H48F H 0.374998 0.507421 0.931776 0.124 Uiso 0.15 1 calc . U P H -2
 N46B N 0.482(3) 0.410(5) 0.734(10) 0.079(17) Uani 0.15 1 d D U P A -1
 C47B C 0.495(4) 0.456(5) 0.805(9) 0.079(17) Uani 0.15 1 d D U P A -1
 C48B C 0.492(6) 0.496(9) 0.948(9) 0.079(17) Uani 0.15 1 d D U P A -1
 H48G H 0.515381 0.537400 0.947247 0.118 Uiso 0.15 1 calc . U P I -1
 H48H H 0.501298 0.463197 1.024303 0.118 Uiso 0.15 1 calc . U P J -1
 H48I H 0.458244 0.513907 0.962279 0.118 Uiso 0.15 1 calc . U P K -1

loop_
  _atom_site_aniso_label
  _atom_site_aniso_U_11
  _atom_site_aniso_U_22
  _atom_site_aniso_U_33
  _atom_site_aniso_U_23
  _atom_site_aniso_U_13
  _atom_site_aniso_U_12
 Mo1 0.0283(3) 0.0176(3) 0.0168(3) 0.0000(3) 0.0004(3) 0.0006(3)
 S2 0.0340(11) 0.0190(10) 0.0203(8) 0.0002(8) -0.0007(8) -0.0009(10)
 S1 0.0340(11) 0.0184(9) 0.0220(8) 0.0003(8) -0.0023(8) 0.0000(9)
 S3 0.0399(13) 0.0227(10) 0.0269(10) 0.0040(8) 0.0054(10) -0.0025(11)
 P1 0.0326(12) 0.0185(10) 0.0216(9) 0.0005(8) -0.0006(9) 0.0001(10)
 O1 0.026(2) 0.024(2) 0.0189(19) 0.0063(18) 0.0041(18) -0.0029(19)
 O2 0.037(3) 0.020(3) 0.026(3) -0.002(3) 0.000(2) 0.000(3)
 O3 0.035(4) 0.048(4) 0.040(4) 0.010(4) -0.001(3) 0.007(4)
 N38 0.025(3) 0.020(3) 0.018(3) 0.003(3) -0.001(3) 0.001(3)
 N8 0.027(4) 0.018(3) 0.028(3) 0.005(3) -0.001(3) 0.000(3)
 C1 0.030(5) 0.024(4) 0.024(4) -0.004(4) -0.008(4) -0.005(4)
 C5 0.043(6) 0.018(4) 0.027(4) -0.005(4) 0.006(4) 0.000(4)
 C2 0.035(5) 0.025(4) 0.024(4) -0.005(4) 0.004(4) 0.000(4)
 C3 0.041(5) 0.026(5) 0.023(4) 0.002(4) 0.009(4) -0.003(4)
 C4 0.048(6) 0.029(5) 0.019(4) -0.002(4) 0.004(4) -0.007(5)
 C6 0.035(5) 0.022(4) 0.017(4) 0.000(3) -0.004(4) -0.005(4)
 C7 0.029(5) 0.024(4) 0.030(4) -0.011(4) -0.005(4) 0.001(4)
 C9 0.035(5) 0.018(4) 0.019(3) -0.010(4) -0.003(4) -0.006(4)
 C10 0.026(4) 0.025(4) 0.015(4) -0.001(3) 0.001(3) 0.000(4)
 C11 0.040(6) 0.021(4) 0.025(4) -0.004(4) 0.002(4) -0.001(4)
 C12 0.035(5) 0.035(5) 0.022(4) -0.001(4) 0.004(4) -0.001(5)
 C13 0.032(5) 0.027(4) 0.029(4) 0.000(4) 0.008(4) -0.001(4)
 C14 0.033(5) 0.025(4) 0.029(4) 0.001(4) -0.004(4) 0.002(4)
 C15 0.031(4) 0.019(4) 0.014(3) -0.001(3) 0.008(4) 0.005(4)
 C32 0.039(5) 0.017(4) 0.017(3) 0.001(3) -0.001(4) -0.004(4)
 C33 0.025(4) 0.022(4) 0.023(4) 0.004(3) 0.004(4) 0.000(4)
 C37 0.035(5) 0.027(4) 0.018(3) -0.001(4) -0.004(4) 0.000(4)
 C36 0.048(6) 0.034(5) 0.029(4) -0.017(4) -0.004(5) -0.001(5)
 C35 0.057(7) 0.047(6) 0.025(4) -0.003(5) -0.006(5) 0.007(5)
 C34 0.054(6) 0.033(5) 0.016(4) 0.001(4) -0.004(4) 0.012(5)
 C16 0.032(4) 0.022(4) 0.023(4) 0.001(4) 0.001(3) 0.004(4)
 C17 0.036(5) 0.027(4) 0.029(4) 0.003(4) 0.008(4) 0.005(4)
 C18 0.037(5) 0.022(4) 0.036(5) -0.001(4) 0.006(4) 0.005(4)
 C19 0.040(5) 0.041(6) 0.028(4) 0.006(4) 0.000(4) 0.006(5)
 C20 0.082(9) 0.025(5) 0.027(5) 0.000(4) 0.017(5) 0.013(5)
 C21 0.114(13) 0.071(9) 0.037(6) 0.014(6) 0.005(7) 0.039(9)
 C22 0.103(11) 0.038(6) 0.028(5) 0.000(5) -0.003(6) 0.001(7)
 C23 0.23(2) 0.049(8) 0.044(7) 0.013(7) 0.012(11) -0.057(12)
 C24 0.045(6) 0.034(5) 0.052(6) -0.014(5) 0.019(5) 0.004(5)
 C27 0.099(11) 0.053(7) 0.063(8) -0.013(7) 0.054(9) -0.011(8)
 C25 0.046(7) 0.054(8) 0.116(12) -0.033(9) 0.008(8) 0.006(7)
 C26 0.055(7) 0.042(6) 0.067(7) -0.020(6) 0.024(7) 0.002(6)
 C28 0.031(5) 0.027(4) 0.033(4) -0.001(4) 0.001(4) -0.001(4)
 C29 0.060(7) 0.037(5) 0.043(5) -0.020(5) -0.015(5) -0.003(5)
 C30 0.040(6) 0.035(6) 0.100(10) -0.022(6) 0.026(7) -0.012(5)
 C31 0.047(6) 0.027(5) 0.048(5) 0.010(5) 0.003(5) -0.012(5)
 C39 0.048(6) 0.023(4) 0.024(4) 0.000(4) -0.001(4) 0.001(4)
 C40 0.049(6) 0.047(6) 0.033(5) 0.016(5) 0.000(5) -0.002(5)
 C41 0.034(5) 0.056(6) 0.035(5) 0.019(5) 0.006(4) -0.001(5)
 C42 0.036(5) 0.033(5) 0.034(5) -0.002(4) -0.004(4) 0.001(5)
 C43 0.042(6) 0.048(6) 0.030(4) 0.014(5) -0.002(4) 0.013(6)
 C44 0.046(6) 0.034(5) 0.028(4) 0.008(4) 0.006(4) 0.004(5)
 C45 0.035(5) 0.056(7) 0.057(6) 0.029(6) 0.001(6) -0.001(5)
 N46A 0.074(14) 0.13(2) 0.129(19) 0.028(18) -0.025(16) 0.000(16)
 C47A 0.11(2) 0.059(12) 0.054(11) -0.003(10) -0.020(13) 0.022(15)
 C48A 0.11(2) 0.082(17) 0.090(16) -0.001(15) 0.032(17) -0.009(16)
 N46C 0.09(2) 0.08(2) 0.08(2) 0.002(16) 0.000(16) 0.002(17)
 C47C 0.09(2) 0.08(2) 0.08(2) 0.002(16) 0.000(16) 0.002(17)
 C48C 0.09(2) 0.08(2) 0.08(2) 0.002(16) 0.000(16) 0.002(17)
 N46B 0.08(3) 0.08(2) 0.08(2) 0.00(2) 0.01(2) 0.01(2)
 C47B 0.08(3) 0.08(2) 0.08(2) 0.00(2) 0.01(2) 0.01(2)
 C48B 0.08(3) 0.08(2) 0.08(2) 0.00(2) 0.01(2) 0.01(2)

_geom_special_details
;
 All esds (except the esd in the dihedral angle between two l.s. planes)
 are estimated using the full covariance matrix.  The cell esds are taken
 into account individually in the estimation of esds in distances, angles
 and torsion angles; correlations between esds in cell parameters are only
 used when they are defined by crystal symmetry.  An approximate (isotropic)
 treatment of cell esds is used for estimating esds involving l.s. planes.
;
loop_
  _geom_bond_atom_site_label_1
  _geom_bond_atom_site_label_2
  _geom_bond_distance
  _geom_bond_site_symmetry_2
  _geom_bond_publ_flag
 Mo1 S2 2.378(2) . ?
 Mo1 S1 2.373(2) . ?
 Mo1 O1 1.901(6) . ?
 Mo1 O2 1.883(6) . ?
 Mo1 N38 2.237(6) . ?
 Mo1 N8 2.290(7) . ?
 S2 P1 2.098(3) . ?
 S1 P1 2.099(3) . ?
 S3 P1 1.959(3) . ?
 P1 C39 1.807(11) . ?
 O1 C1 1.357(11) . ?
 O2 C15 1.356(10) . ?
 O3 C42 1.365(12) . ?
 O3 C45 1.423(13) . ?
 N38 C33 1.350(11) . ?
 N38 C37 1.336(11) . ?
 N8 C7 1.491(12) . ?
 N8 C9 1.504(10) . ?
 N8 C32 1.480(11) . ?
 C1 C2 1.410(13) . ?
 C1 C6 1.426(13) . ?
 C5 H5 0.9500 . ?
 C5 C4 1.390(13) . ?
 C5 C6 1.362(12) . ?
 C2 C3 1.410(13) . ?
 C2 C16 1.519(12) . ?
 C3 H3 0.9500 . ?
 C3 C4 1.391(14) . ?
 C4 C20 1.529(13) . ?
 C6 C7 1.521(12) . ?
 C7 H7A 0.9900 . ?
 C7 H7B 0.9900 . ?
 C9 H9A 0.9900 . ?
 C9 H9B 0.9900 . ?
 C9 C10 1.513(12) . ?
 C10 C11 1.402(13) . ?
 C10 C15 1.382(12) . ?
 C11 H11 0.9500 . ?
 C11 C12 1.362(14) . ?
 C12 C13 1.403(14) . ?
 C12 C24 1.557(14) . ?
 C13 H13 0.9500 . ?
 C13 C14 1.398(13) . ?
 C14 C15 1.407(13) . ?
 C14 C28 1.541(13) . ?
 C32 H32A 0.9900 . ?
 C32 H32B 0.9900 . ?
 C32 C33 1.507(11) . ?
 C33 C34 1.390(12) . ?
 C37 H37 0.9500 . ?
 C37 C36 1.369(13) . ?
 C36 H36 0.9500 . ?
 C36 C35 1.363(15) . ?
 C35 H35 0.9500 . ?
 C35 C34 1.386(14) . ?
 C34 H34 0.9500 . ?
 C16 C17 1.543(12) . ?
 C16 C18 1.539(13) . ?
 C16 C19 1.551(12) . ?
 C17 H17A 0.9800 . ?
 C17 H17B 0.9800 . ?
 C17 H17C 0.9800 . ?
 C18 H18A 0.9800 . ?
 C18 H18B 0.9800 . ?
 C18 H18C 0.9800 . ?
 C19 H19A 0.9800 . ?
 C19 H19B 0.9800 . ?
 C19 H19C 0.9800 . ?
 C20 C21 1.55(2) . ?
 C20 C22 1.517(14) . ?
 C20 C23 1.487(19) . ?
 C21 H21A 0.9800 . ?
 C21 H21B 0.9800 . ?
 C21 H21C 0.9800 . ?
 C22 H22A 0.9800 . ?
 C22 H22B 0.9800 . ?
 C22 H22C 0.9800 . ?
 C23 H23A 0.9800 . ?
 C23 H23B 0.9800 . ?
 C23 H23C 0.9800 . ?
 C24 C27 1.529(17) . ?
 C24 C25 1.521(19) . ?
 C24 C26 1.516(16) . ?
 C27 H27A 0.9800 . ?
 C27 H27B 0.9800 . ?
 C27 H27C 0.9800 . ?
 C25 H25A 0.9800 . ?
 C25 H25B 0.9800 . ?
 C25 H25C 0.9800 . ?
 C26 H26A 0.9800 . ?
 C26 H26B 0.9800 . ?
 C26 H26C 0.9800 . ?
 C28 C29 1.540(14) . ?
 C28 C30 1.511(14) . ?
 C28 C31 1.534(14) . ?
 C29 H29A 0.9800 . ?
 C29 H29B 0.9800 . ?
 C29 H29C 0.9800 . ?
 C30 H30A 0.9800 . ?
 C30 H30B 0.9800 . ?
 C30 H30C 0.9800 . ?
 C31 H31A 0.9800 . ?
 C31 H31B 0.9800 . ?
 C31 H31C 0.9800 . ?
 C39 C40 1.397(14) . ?
 C39 C44 1.403(14) . ?
 C40 H40 0.9500 . ?
 C40 C41 1.379(15) . ?
 C41 H41 0.9500 . ?
 C41 C42 1.390(14) . ?
 C42 C43 1.387(15) . ?
 C43 H43 0.9500 . ?
 C43 C44 1.383(15) . ?
 C44 H44 0.9500 . ?
 C45 H45A 0.9800 . ?
 C45 H45B 0.9800 . ?
 C45 H45C 0.9800 . ?
 N46A C47A 1.14(2) . ?
 C47A C48A 1.48(2) . ?
 C47A N46B 1.64(9) . ?
 C48A H48A 0.9800 . ?
 C48A H48B 0.9800 . ?
 C48A H48C 0.9800 . ?
 C48A N46B 1.20(9) . ?
 N46C C47C 1.15(3) . ?
 C47C C48C 1.54(3) . ?
 C48C H48D 0.9800 . ?
 C48C H48E 0.9800 . ?
 C48C H48F 0.9800 . ?
 N46B C47B 1.15(3) . ?
 C47B C48B 1.54(3) . ?
 C48B H48G 0.9800 . ?
 C48B H48H 0.9800 . ?
 C48B H48I 0.9800 . ?

loop_
  _geom_angle_atom_site_label_1
  _geom_angle_atom_site_label_2
  _geom_angle_atom_site_label_3
  _geom_angle
  _geom_angle_site_symmetry_1
  _geom_angle_site_symmetry_3
  _geom_angle_publ_flag
 S1 Mo1 S2 80.71(7) . . ?
 O1 Mo1 S2 97.03(18) . . ?
 O1 Mo1 S1 99.83(19) . . ?
 O1 Mo1 N38 82.3(2) . . ?
 O1 Mo1 N8 84.2(3) . . ?
 O2 Mo1 S2 93.35(18) . . ?
 O2 Mo1 S1 96.95(19) . . ?
 O2 Mo1 O1 161.5(3) . . ?
 O2 Mo1 N38 86.6(3) . . ?
 O2 Mo1 N8 78.7(3) . . ?
 N38 Mo1 S2 177.60(19) . . ?
 N38 Mo1 S1 101.68(18) . . ?
 N38 Mo1 N8 75.9(3) . . ?
 N8 Mo1 S2 101.76(19) . . ?
 N8 Mo1 S1 175.0(2) . . ?
 P1 S2 Mo1 92.34(9) . . ?
 P1 S1 Mo1 92.45(9) . . ?
 S2 P1 S1 94.24(11) . . ?
 S3 P1 S2 116.77(13) . . ?
 S3 P1 S1 116.96(14) . . ?
 C39 P1 S2 109.1(3) . . ?
 C39 P1 S1 108.8(3) . . ?
 C39 P1 S3 109.9(3) . . ?
 C1 O1 Mo1 135.5(6) . . ?
 C15 O2 Mo1 144.9(6) . . ?
 C42 O3 C45 117.2(8) . . ?
 C33 N38 Mo1 115.9(5) . . ?
 C37 N38 Mo1 125.7(6) . . ?
 C37 N38 C33 117.9(7) . . ?
 C7 N8 Mo1 111.0(5) . . ?
 C7 N8 C9 106.0(7) . . ?
 C9 N8 Mo1 110.4(5) . . ?
 C32 N8 Mo1 110.3(5) . . ?
 C32 N8 C7 109.8(7) . . ?
 C32 N8 C9 109.2(6) . . ?
 O1 C1 C2 122.7(8) . . ?
 O1 C1 C6 117.0(8) . . ?
 C2 C1 C6 120.3(8) . . ?
 C4 C5 H5 119.6 . . ?
 C6 C5 H5 119.6 . . ?
 C6 C5 C4 120.9(8) . . ?
 C1 C2 C3 115.2(8) . . ?
 C1 C2 C16 123.1(8) . . ?
 C3 C2 C16 121.6(8) . . ?
 C2 C3 H3 117.6 . . ?
 C4 C3 C2 124.7(8) . . ?
 C4 C3 H3 117.6 . . ?
 C5 C4 C3 117.5(8) . . ?
 C5 C4 C20 120.5(9) . . ?
 C3 C4 C20 122.0(8) . . ?
 C1 C6 C7 116.9(8) . . ?
 C5 C6 C1 120.9(8) . . ?
 C5 C6 C7 122.2(8) . . ?
 N8 C7 C6 112.8(7) . . ?
 N8 C7 H7A 109.0 . . ?
 N8 C7 H7B 109.0 . . ?
 C6 C7 H7A 109.0 . . ?
 C6 C7 H7B 109.0 . . ?
 H7A C7 H7B 107.8 . . ?
 N8 C9 H9A 108.8 . . ?
 N8 C9 H9B 108.8 . . ?
 N8 C9 C10 113.7(6) . . ?
 H9A C9 H9B 107.7 . . ?
 C10 C9 H9A 108.8 . . ?
 C10 C9 H9B 108.8 . . ?
 C11 C10 C9 120.5(8) . . ?
 C15 C10 C9 121.5(8) . . ?
 C15 C10 C11 117.9(8) . . ?
 C10 C11 H11 118.6 . . ?
 C12 C11 C10 122.7(8) . . ?
 C12 C11 H11 118.6 . . ?
 C11 C12 C13 117.2(9) . . ?
 C11 C12 C24 123.7(9) . . ?
 C13 C12 C24 119.0(9) . . ?
 C12 C13 H13 118.2 . . ?
 C14 C13 C12 123.6(9) . . ?
 C14 C13 H13 118.2 . . ?
 C13 C14 C15 115.7(8) . . ?
 C13 C14 C28 122.2(8) . . ?
 C15 C14 C28 122.1(8) . . ?
 O2 C15 C10 118.4(8) . . ?
 O2 C15 C14 118.8(7) . . ?
 C10 C15 C14 122.7(8) . . ?
 N8 C32 H32A 109.1 . . ?
 N8 C32 H32B 109.1 . . ?
 N8 C32 C33 112.4(7) . . ?
 H32A C32 H32B 107.8 . . ?
 C33 C32 H32A 109.1 . . ?
 C33 C32 H32B 109.1 . . ?
 N38 C33 C32 117.7(7) . . ?
 N38 C33 C34 121.6(8) . . ?
 C34 C33 C32 120.5(8) . . ?
 N38 C37 H37 118.1 . . ?
 N38 C37 C36 123.9(9) . . ?
 C36 C37 H37 118.1 . . ?
 C37 C36 H36 121.0 . . ?
 C35 C36 C37 118.1(9) . . ?
 C35 C36 H36 121.0 . . ?
 C36 C35 H35 119.9 . . ?
 C36 C35 C34 120.2(9) . . ?
 C34 C35 H35 119.9 . . ?
 C33 C34 H34 120.8 . . ?
 C35 C34 C33 118.4(9) . . ?
 C35 C34 H34 120.8 . . ?
 C2 C16 C17 112.6(7) . . ?
 C2 C16 C18 111.3(7) . . ?
 C2 C16 C19 108.5(7) . . ?
 C17 C16 C19 107.7(7) . . ?
 C18 C16 C17 107.1(7) . . ?
 C18 C16 C19 109.5(7) . . ?
 C16 C17 H17A 109.5 . . ?
 C16 C17 H17B 109.5 . . ?
 C16 C17 H17C 109.5 . . ?
 H17A C17 H17B 109.5 . . ?
 H17A C17 H17C 109.5 . . ?
 H17B C17 H17C 109.5 . . ?
 C16 C18 H18A 109.5 . . ?
 C16 C18 H18B 109.5 . . ?
 C16 C18 H18C 109.5 . . ?
 H18A C18 H18B 109.5 . . ?
 H18A C18 H18C 109.5 . . ?
 H18B C18 H18C 109.5 . . ?
 C16 C19 H19A 109.5 . . ?
 C16 C19 H19B 109.5 . . ?
 C16 C19 H19C 109.5 . . ?
 H19A C19 H19B 109.5 . . ?
 H19A C19 H19C 109.5 . . ?
 H19B C19 H19C 109.5 . . ?
 C4 C20 C21 107.7(10) . . ?
 C22 C20 C4 112.7(8) . . ?
 C22 C20 C21 103.7(11) . . ?
 C23 C20 C4 111.0(10) . . ?
 C23 C20 C21 107.2(13) . . ?
 C23 C20 C22 113.9(12) . . ?
 C20 C21 H21A 109.5 . . ?
 C20 C21 H21B 109.5 . . ?
 C20 C21 H21C 109.5 . . ?
 H21A C21 H21B 109.5 . . ?
 H21A C21 H21C 109.5 . . ?
 H21B C21 H21C 109.5 . . ?
 C20 C22 H22A 109.5 . . ?
 C20 C22 H22B 109.5 . . ?
 C20 C22 H22C 109.5 . . ?
 H22A C22 H22B 109.5 . . ?
 H22A C22 H22C 109.5 . . ?
 H22B C22 H22C 109.5 . . ?
 C20 C23 H23A 109.5 . . ?
 C20 C23 H23B 109.5 . . ?
 C20 C23 H23C 109.5 . . ?
 H23A C23 H23B 109.5 . . ?
 H23A C23 H23C 109.5 . . ?
 H23B C23 H23C 109.5 . . ?
 C27 C24 C12 109.2(10) . . ?
 C25 C24 C12 109.5(9) . . ?
 C25 C24 C27 108.9(12) . . ?
 C26 C24 C12 112.0(9) . . ?
 C26 C24 C27 107.8(10) . . ?
 C26 C24 C25 109.5(11) . . ?
 C24 C27 H27A 109.5 . . ?
 C24 C27 H27B 109.5 . . ?
 C24 C27 H27C 109.5 . . ?
 H27A C27 H27B 109.5 . . ?
 H27A C27 H27C 109.5 . . ?
 H27B C27 H27C 109.5 . . ?
 C24 C25 H25A 109.5 . . ?
 C24 C25 H25B 109.5 . . ?
 C24 C25 H25C 109.5 . . ?
 H25A C25 H25B 109.5 . . ?
 H25A C25 H25C 109.5 . . ?
 H25B C25 H25C 109.5 . . ?
 C24 C26 H26A 109.5 . . ?
 C24 C26 H26B 109.5 . . ?
 C24 C26 H26C 109.5 . . ?
 H26A C26 H26B 109.5 . . ?
 H26A C26 H26C 109.5 . . ?
 H26B C26 H26C 109.5 . . ?
 C29 C28 C14 108.9(8) . . ?
 C30 C28 C14 112.1(8) . . ?
 C30 C28 C29 108.8(10) . . ?
 C30 C28 C31 107.8(9) . . ?
 C31 C28 C14 110.5(8) . . ?
 C31 C28 C29 108.6(8) . . ?
 C28 C29 H29A 109.5 . . ?
 C28 C29 H29B 109.5 . . ?
 C28 C29 H29C 109.5 . . ?
 H29A C29 H29B 109.5 . . ?
 H29A C29 H29C 109.5 . . ?
 H29B C29 H29C 109.5 . . ?
 C28 C30 H30A 109.5 . . ?
 C28 C30 H30B 109.5 . . ?
 C28 C30 H30C 109.5 . . ?
 H30A C30 H30B 109.5 . . ?
 H30A C30 H30C 109.5 . . ?
 H30B C30 H30C 109.5 . . ?
 C28 C31 H31A 109.5 . . ?
 C28 C31 H31B 109.5 . . ?
 C28 C31 H31C 109.5 . . ?
 H31A C31 H31B 109.5 . . ?
 H31A C31 H31C 109.5 . . ?
 H31B C31 H31C 109.5 . . ?
 C40 C39 P1 121.5(8) . . ?
 C40 C39 C44 117.2(10) . . ?
 C44 C39 P1 121.4(8) . . ?
 C39 C40 H40 118.8 . . ?
 C41 C40 C39 122.4(10) . . ?
 C41 C40 H40 118.8 . . ?
 C40 C41 H41 120.4 . . ?
 C40 C41 C42 119.2(9) . . ?
 C42 C41 H41 120.4 . . ?
 O3 C42 C41 124.5(10) . . ?
 O3 C42 C43 115.4(9) . . ?
 C43 C42 C41 120.0(9) . . ?
 C42 C43 H43 119.9 . . ?
 C44 C43 C42 120.2(9) . . ?
 C44 C43 H43 119.9 . . ?
 C39 C44 H44 119.5 . . ?
 C43 C44 C39 121.1(10) . . ?
 C43 C44 H44 119.5 . . ?
 O3 C45 H45A 109.5 . . ?
 O3 C45 H45B 109.5 . . ?
 O3 C45 H45C 109.5 . . ?
 H45A C45 H45B 109.5 . . ?
 H45A C45 H45C 109.5 . . ?
 H45B C45 H45C 109.5 . . ?
 N46A C47A C48A 178(3) . . ?
 N46A C47A N46B 135(4) . . ?
 C48A C47A N46B 45(3) . . ?
 C47A C48A H48A 109.5 . . ?
 C47A C48A H48B 109.5 . . ?
 C47A C48A H48C 109.5 . . ?
 H48A C48A H48B 109.5 . . ?
 H48A C48A H48C 109.5 . . ?
 H48B C48A H48C 109.5 . . ?
 N46B C48A C47A 75(5) . . ?
 N46B C48A H48A 155.8 . . ?
 N46B C48A H48B 90.3 . . ?
 N46B C48A H48C 48.8 . . ?
 N46C C47C C48C 157(10) . . ?
 C47C C48C H48D 109.5 . . ?
 C47C C48C H48E 109.5 . . ?
 C47C C48C H48F 109.5 . . ?
 H48D C48C H48E 109.5 . . ?
 H48D C48C H48F 109.5 . . ?
 H48E C48C H48F 109.5 . . ?
 C48A N46B C47A 60(4) . . ?
 C47B N46B C47A 149(10) . . ?
 C47B N46B C48A 141(10) . . ?
 N46B C47B C48B 149(10) . . ?
 C47B C48B H48G 109.5 . . ?
 C47B C48B H48H 109.5 . . ?
 C47B C48B H48I 109.5 . . ?
 H48G C48B H48H 109.5 . . ?
 H48G C48B H48I 109.5 . . ?
 H48H C48B H48I 109.5 . . ?

loop_
  _geom_torsion_atom_site_label_1
  _geom_torsion_atom_site_label_2
  _geom_torsion_atom_site_label_3
  _geom_torsion_atom_site_label_4
  _geom_torsion
  _geom_torsion_site_symmetry_1
  _geom_torsion_site_symmetry_2
  _geom_torsion_site_symmetry_3
  _geom_torsion_site_symmetry_4
  _geom_torsion_publ_flag
 Mo1 O1 C1 C2 132.9(8) . . . . ?
 Mo1 O1 C1 C6 -45.4(11) . . . . ?
 Mo1 O2 C15 C10 -1.0(13) . . . . ?
 Mo1 O2 C15 C14 -179.7(6) . . . . ?
 Mo1 N38 C33 C32 13.5(10) . . . . ?
 Mo1 N38 C33 C34 -170.7(8) . . . . ?
 Mo1 N38 C37 C36 169.7(8) . . . . ?
 Mo1 N8 C7 C6 -63.8(8) . . . . ?
 Mo1 N8 C9 C10 66.8(8) . . . . ?
 Mo1 N8 C32 C33 29.5(8) . . . . ?
 S2 Mo1 O2 C15 -78.8(9) . . . . ?
 S2 P1 C39 C40 61.5(9) . . . . ?
 S2 P1 C39 C44 -116.8(8) . . . . ?
 S1 Mo1 O2 C15 -159.9(9) . . . . ?
 S1 P1 C39 C40 -40.1(9) . . . . ?
 S1 P1 C39 C44 141.7(8) . . . . ?
 S3 P1 C39 C40 -169.3(8) . . . . ?
 S3 P1 C39 C44 12.4(9) . . . . ?
 P1 C39 C40 C41 -177.6(9) . . . . ?
 P1 C39 C44 C43 177.6(9) . . . . ?
 O1 Mo1 O2 C15 45.3(13) . . . . ?
 O1 C1 C2 C3 -172.3(8) . . . . ?
 O1 C1 C2 C16 10.6(14) . . . . ?
 O1 C1 C6 C5 172.6(9) . . . . ?
 O1 C1 C6 C7 -8.9(12) . . . . ?
 O3 C42 C43 C44 178.7(10) . . . . ?
 N38 Mo1 O2 C15 98.8(9) . . . . ?
 N38 C33 C34 C35 -0.9(16) . . . . ?
 N38 C37 C36 C35 1.0(17) . . . . ?
 N8 Mo1 O2 C15 22.5(9) . . . . ?
 N8 C9 C10 C11 142.3(8) . . . . ?
 N8 C9 C10 C15 -40.3(10) . . . . ?
 N8 C32 C33 N38 -29.5(11) . . . . ?
 N8 C32 C33 C34 154.5(9) . . . . ?
 C1 C2 C3 C4 -0.7(15) . . . . ?
 C1 C2 C16 C17 175.9(9) . . . . ?
 C1 C2 C16 C18 -63.7(11) . . . . ?
 C1 C2 C16 C19 56.9(12) . . . . ?
 C1 C6 C7 N8 63.5(11) . . . . ?
 C5 C4 C20 C21 55.8(14) . . . . ?
 C5 C4 C20 C22 169.5(11) . . . . ?
 C5 C4 C20 C23 -61.3(17) . . . . ?
 C5 C6 C7 N8 -118.0(10) . . . . ?
 C2 C1 C6 C5 -5.7(14) . . . . ?
 C2 C1 C6 C7 172.8(8) . . . . ?
 C2 C3 C4 C5 -4.8(16) . . . . ?
 C2 C3 C4 C20 175.6(11) . . . . ?
 C3 C2 C16 C17 -1.0(13) . . . . ?
 C3 C2 C16 C18 119.4(10) . . . . ?
 C3 C2 C16 C19 -120.0(10) . . . . ?
 C3 C4 C20 C21 -124.7(11) . . . . ?
 C3 C4 C20 C22 -11.0(17) . . . . ?
 C3 C4 C20 C23 118.2(14) . . . . ?
 C4 C5 C6 C1 -0.1(15) . . . . ?
 C4 C5 C6 C7 -178.5(9) . . . . ?
 C6 C1 C2 C3 5.9(13) . . . . ?
 C6 C1 C2 C16 -171.2(8) . . . . ?
 C6 C5 C4 C3 5.1(15) . . . . ?
 C6 C5 C4 C20 -175.3(10) . . . . ?
 C7 N8 C9 C10 -173.0(7) . . . . ?
 C7 N8 C32 C33 -93.1(8) . . . . ?
 C9 N8 C7 C6 176.3(7) . . . . ?
 C9 N8 C32 C33 151.0(7) . . . . ?
 C9 C10 C11 C12 176.6(8) . . . . ?
 C9 C10 C15 O2 1.8(11) . . . . ?
 C9 C10 C15 C14 -179.6(8) . . . . ?
 C10 C11 C12 C13 2.6(14) . . . . ?
 C10 C11 C12 C24 -180.0(9) . . . . ?
 C11 C10 C15 O2 179.2(7) . . . . ?
 C11 C10 C15 C14 -2.1(12) . . . . ?
 C11 C12 C13 C14 -1.5(14) . . . . ?
 C11 C12 C24 C27 125.5(11) . . . . ?
 C11 C12 C24 C25 -115.5(12) . . . . ?
 C11 C12 C24 C26 6.2(15) . . . . ?
 C12 C13 C14 C15 -1.2(13) . . . . ?
 C12 C13 C14 C28 179.6(9) . . . . ?
 C13 C12 C24 C27 -57.1(13) . . . . ?
 C13 C12 C24 C25 61.9(13) . . . . ?
 C13 C12 C24 C26 -176.4(10) . . . . ?
 C13 C14 C15 O2 -178.3(7) . . . . ?
 C13 C14 C15 C10 3.1(12) . . . . ?
 C13 C14 C28 C29 -119.3(10) . . . . ?
 C13 C14 C28 C30 1.2(13) . . . . ?
 C13 C14 C28 C31 121.5(9) . . . . ?
 C15 C10 C11 C12 -0.9(13) . . . . ?
 C15 C14 C28 C29 61.5(11) . . . . ?
 C15 C14 C28 C30 -178.0(10) . . . . ?
 C15 C14 C28 C31 -57.7(11) . . . . ?
 C32 N8 C7 C6 58.4(9) . . . . ?
 C32 N8 C9 C10 -54.7(9) . . . . ?
 C32 C33 C34 C35 174.9(9) . . . . ?
 C33 N38 C37 C36 -1.8(14) . . . . ?
 C37 N38 C33 C32 -174.2(8) . . . . ?
 C37 N38 C33 C34 1.6(13) . . . . ?
 C37 C36 C35 C34 -0.2(18) . . . . ?
 C36 C35 C34 C33 0.2(17) . . . . ?
 C16 C2 C3 C4 176.5(9) . . . . ?
 C24 C12 C13 C14 -179.1(9) . . . . ?
 C28 C14 C15 O2 0.9(12) . . . . ?
 C28 C14 C15 C10 -177.7(8) . . . . ?
 C39 C40 C41 C42 -0.3(18) . . . . ?
 C40 C39 C44 C43 -0.8(16) . . . . ?
 C40 C41 C42 O3 -178.6(11) . . . . ?
 C40 C41 C42 C43 -0.2(17) . . . . ?
 C41 C42 C43 C44 0.2(17) . . . . ?
 C42 C43 C44 C39 0.3(17) . . . . ?
 C44 C39 C40 C41 0.7(16) . . . . ?
 C45 O3 C42 C41 -6.0(16) . . . . ?
 C45 O3 C42 C43 175.7(10) . . . . ?
 N46A C47A N46B C48A 177(4) . . . . ?
 N46A C47A N46B C47B 35(22) . . . . ?
 C47A C48A N46B C47B 150(17) . . . . ?
 C47A N46B C47B C48B 13(39) . . . . ?
 C48A C47A N46B C47B -143(21) . . . . ?
 C48A N46B C47B C48B -110(26) . . . . ?

_shelx_res_file
;
TITL AL-03062021_auto in P21212 #18
    3.res
    created by SHELXL-2018/3 at 11:36:24 on 03-Jun-2022
REM reset to P21212 #18
CELL 1.54184 26.840165 18.504499 9.472867 90 90 90
ZERR 4 0.001723 0.001461 0.000689 0 0 0
LATT -1
SYMM -X,-Y,+Z
SYMM 0.5+X,0.5-Y,-Z
SYMM 0.5-X,0.5+Y,-Z
SFAC C H Mo N O P S
UNIT 180 240 4 12 12 4 12
ISOR 0.002 0.004 O1
EADP N46B C47B C48B
EADP N46C C47C C48C
DFIX 1.54 C48A C47A
DFIX 1.54 C48C C47C
DFIX 1.54 C47B C48B
ISOR 0.05 0.02 N46B C47B C48B
ISOR 0.05 0.02 N46C C47C C48C
DFIX 1.15 N46C C47C
DFIX 1.15 N46B C47B
DFIX 1.15 N46A C47A

L.S. 10
PLAN  5
SIZE 0.04 0.09 0.3
TEMP -148.15(10)
CONF
MORE -1
BOND $H
fmap 2
acta
OMIT 2 8 10
OMIT 5 9 9
OMIT 11 9 7
OMIT 7 7 10
REM <olex2.extras>
REM <HklSrc "%.\\3.hkl">
REM </olex2.extras>

WGHT    0.103400
FVAR       0.53298
MO1   3    0.224803    0.444798    0.565051    11.00000    0.02830    0.01756 =
         0.01684    0.00004    0.00036    0.00064
S2    7    0.186441    0.453227    0.339397    11.00000    0.03404    0.01899 =
         0.02027    0.00020   -0.00068   -0.00093
S1    7    0.212023    0.571596    0.555562    11.00000    0.03404    0.01842 =
         0.02197    0.00028   -0.00229    0.00001
S3    7    0.220087    0.619459    0.203191    11.00000    0.03990    0.02269 =
         0.02692    0.00401    0.00541   -0.00248
P1    6    0.183617    0.566442    0.349306    11.00000    0.03261    0.01852 =
         0.02158    0.00051   -0.00065    0.00012
O1    5    0.167002    0.416815    0.667269    11.00000    0.02644    0.02387 =
         0.01886    0.00631    0.00409   -0.00288
O2    5    0.289675    0.444616    0.489400    11.00000    0.03681    0.01975 =
         0.02635   -0.00210    0.00018   -0.00030
O3    5   -0.029800    0.657843    0.342525    11.00000    0.03455    0.04824 =
         0.04018    0.00966   -0.00096    0.00720
N38   4    0.260779    0.431814    0.776565    11.00000    0.02494    0.01971 =
         0.01816    0.00283   -0.00141    0.00106
N8    4    0.244382    0.324480    0.575984    11.00000    0.02741    0.01830 =
         0.02758    0.00513   -0.00118    0.00004
C1    1    0.156441    0.366754    0.767640    11.00000    0.03001    0.02351 =
         0.02406   -0.00416   -0.00752   -0.00470
C5    1    0.171588    0.244356    0.848444    11.00000    0.04278    0.01755 =
         0.02701   -0.00481    0.00626    0.00029
AFIX  43
H5    2    0.184530    0.197324    0.831951    11.00000   -1.20000
AFIX   0
C2    1    0.129107    0.383249    0.890618    11.00000    0.03515    0.02521 =
         0.02378   -0.00459    0.00408    0.00011
C3    1    0.126867    0.327507    0.991976    11.00000    0.04114    0.02574 =
         0.02257    0.00229    0.00871   -0.00328
AFIX  43
H3    2    0.109063    0.336821    1.076720    11.00000   -1.20000
AFIX   0
C4    1    0.148856    0.259864    0.976780    11.00000    0.04831    0.02929 =
         0.01934   -0.00208    0.00354   -0.00681
C6    1    0.175546    0.295691    0.746067    11.00000    0.03521    0.02230 =
         0.01677    0.00020   -0.00394   -0.00508
C7    1    0.199086    0.279970    0.603321    11.00000    0.02928    0.02364 =
         0.02953   -0.01053   -0.00492    0.00052
AFIX  23
H7A   2    0.208188    0.228176    0.598820    11.00000   -1.20000
H7B   2    0.174281    0.289406    0.528201    11.00000   -1.20000
AFIX   0
C9    1    0.264782    0.299008    0.436722    11.00000    0.03536    0.01753 =
         0.01948   -0.01032   -0.00282   -0.00560
AFIX  23
H9A   2    0.240558    0.310960    0.361448    11.00000   -1.20000
H9B   2    0.268270    0.245767    0.439538    11.00000   -1.20000
AFIX   0
C10   1    0.314685    0.331881    0.399274    11.00000    0.02577    0.02512 =
         0.01549   -0.00102    0.00123   -0.00012
C11   1    0.351271    0.290434    0.331389    11.00000    0.04002    0.02054 =
         0.02514   -0.00427    0.00241   -0.00065
AFIX  43
H11   2    0.344753    0.240750    0.314162    11.00000   -1.20000
AFIX   0
C12   1    0.395760    0.318439    0.289119    11.00000    0.03533    0.03517 =
         0.02239   -0.00125    0.00399   -0.00069
C13   1    0.405077    0.391213    0.321379    11.00000    0.03175    0.02712 =
         0.02860    0.00017    0.00756   -0.00087
AFIX  43
H13   2    0.436281    0.411206    0.294636    11.00000   -1.20000
AFIX   0
C14   1    0.370942    0.435898    0.390730    11.00000    0.03274    0.02528 =
         0.02934    0.00103   -0.00425    0.00209
C15   1    0.325017    0.403820    0.425274    11.00000    0.03087    0.01920 =
         0.01439   -0.00117    0.00839    0.00535
C32   1    0.281825    0.311397    0.687864    11.00000    0.03876    0.01730 =
         0.01662    0.00129   -0.00127   -0.00355
AFIX  23
H32A  2    0.315597    0.314283    0.646220    11.00000   -1.20000
H32B  2    0.277305    0.261970    0.725759    11.00000   -1.20000
AFIX   0
C33   1    0.277888    0.364999    0.807170    11.00000    0.02475    0.02240 =
         0.02263    0.00376    0.00351   -0.00035
C37   1    0.261367    0.481318    0.879209    11.00000    0.03500    0.02723 =
         0.01805   -0.00092   -0.00355    0.00042
AFIX  43
H37   2    0.250235    0.528738    0.857250    11.00000   -1.20000
AFIX   0
C36   1    0.277051    0.467780    1.014106    11.00000    0.04768    0.03409 =
         0.02942   -0.01689   -0.00436   -0.00061
AFIX  43
H36   2    0.276292    0.504518    1.084125    11.00000   -1.20000
AFIX   0
C35   1    0.293791    0.400074    1.045118    11.00000    0.05710    0.04693 =
         0.02524   -0.00338   -0.00612    0.00666
AFIX  43
H35   2    0.305016    0.389177    1.137816    11.00000   -1.20000
AFIX   0
C34   1    0.294476    0.347081    0.941710    11.00000    0.05405    0.03272 =
         0.01599    0.00147   -0.00415    0.01184
AFIX  43
H34   2    0.305995    0.299692    0.962274    11.00000   -1.20000
AFIX   0
C16   1    0.101641    0.454231    0.911274    11.00000    0.03181    0.02228 =
         0.02347    0.00071    0.00095    0.00439
C17   1    0.071713    0.456336    1.050248    11.00000    0.03578    0.02659 =
         0.02900    0.00255    0.00817    0.00457
AFIX 137
H17A  2    0.094661    0.453361    1.130505    11.00000   -1.50000
H17B  2    0.048597    0.415366    1.053063    11.00000   -1.50000
H17C  2    0.052868    0.501619    1.055460    11.00000   -1.50000
AFIX   0
C18   1    0.137978    0.518540    0.914272    11.00000    0.03661    0.02234 =
         0.03569   -0.00106    0.00630    0.00532
AFIX 137
H18A  2    0.119673    0.562850    0.937092    11.00000   -1.50000
H18B  2    0.153795    0.523698    0.821576    11.00000   -1.50000
H18C  2    0.163606    0.510026    0.986057    11.00000   -1.50000
AFIX   0
C19   1    0.064249    0.463942    0.787834    11.00000    0.04001    0.04060 =
         0.02830    0.00556   -0.00006    0.00605
AFIX 137
H19A  2    0.040546    0.423659    0.787631    11.00000   -1.50000
H19B  2    0.082425    0.464768    0.698126    11.00000   -1.50000
H19C  2    0.046154    0.509534    0.799771    11.00000   -1.50000
AFIX   0
C20   1    0.148087    0.203698    1.095141    11.00000    0.08157    0.02502 =
         0.02691   -0.00004    0.01734    0.01256
C21   1    0.202768    0.181375    1.125524    11.00000    0.11404    0.07113 =
         0.03705    0.01417    0.00476    0.03855
AFIX 137
H21A  2    0.203464    0.146285    1.202984    11.00000   -1.50000
H21B  2    0.222104    0.224191    1.152085    11.00000   -1.50000
H21C  2    0.217271    0.159550    1.040693    11.00000   -1.50000
AFIX   0
C22   1    0.130290    0.234633    1.234557    11.00000    0.10260    0.03761 =
         0.02803    0.00033   -0.00296    0.00078
AFIX 137
H22A  2    0.095409    0.249619    1.225721    11.00000   -1.50000
H22B  2    0.150792    0.276524    1.259698    11.00000   -1.50000
H22C  2    0.133169    0.197746    1.308340    11.00000   -1.50000
AFIX   0
C23   1    0.121027    0.137377    1.050477    11.00000    0.23367    0.04945 =
         0.04401    0.01327    0.01182   -0.05728
AFIX 137
H23A  2    0.136434    0.117882    0.964765    11.00000   -1.50000
H23B  2    0.086106    0.149337    1.031325    11.00000   -1.50000
H23C  2    0.122713    0.101219    1.125915    11.00000   -1.50000
AFIX   0
C24   1    0.436966    0.273617    0.213483    11.00000    0.04493    0.03413 =
         0.05175   -0.01355    0.01857    0.00391
C27   1    0.450879    0.310847    0.074885    11.00000    0.09932    0.05287 =
         0.06334   -0.01324    0.05350   -0.01129
AFIX 137
H27A  2    0.421040    0.316233    0.016198    11.00000   -1.50000
H27B  2    0.475578    0.281546    0.024597    11.00000   -1.50000
H27C  2    0.464936    0.358625    0.095027    11.00000   -1.50000
AFIX   0
C25   1    0.482951    0.269746    0.307076    11.00000    0.04650    0.05364 =
         0.11613   -0.03311    0.00795    0.00641
AFIX 137
H25A  2    0.496076    0.318557    0.322183    11.00000   -1.50000
H25B  2    0.508400    0.239919    0.261160    11.00000   -1.50000
H25C  2    0.473997    0.248268    0.398175    11.00000   -1.50000
AFIX   0
C26   1    0.419539    0.197772    0.178583    11.00000    0.05489    0.04220 =
         0.06681   -0.02017    0.02376    0.00189
AFIX 137
H26A  2    0.410050    0.172782    0.265742    11.00000   -1.50000
H26B  2    0.446569    0.171228    0.132234    11.00000   -1.50000
H26C  2    0.390730    0.200274    0.115210    11.00000   -1.50000
AFIX   0
C28   1    0.382568    0.515513    0.425403    11.00000    0.03140    0.02711 =
         0.03324   -0.00111    0.00081   -0.00125
C29   1    0.380462    0.526019    0.586534    11.00000    0.05974    0.03696 =
         0.04277   -0.01999   -0.01462   -0.00308
AFIX 137
H29A  2    0.346705    0.515655    0.620358    11.00000   -1.50000
H29B  2    0.389231    0.576031    0.609797    11.00000   -1.50000
H29C  2    0.404111    0.493059    0.632001    11.00000   -1.50000
AFIX   0
C30   1    0.433496    0.537977    0.373353    11.00000    0.03977    0.03458 =
         0.09966   -0.02217    0.02577   -0.01249
AFIX 137
H30A  2    0.459171    0.511741    0.426114    11.00000   -1.50000
H30B  2    0.437844    0.590055    0.387567    11.00000   -1.50000
H30C  2    0.436494    0.526703    0.272629    11.00000   -1.50000
AFIX   0
C31   1    0.343963    0.565523    0.356686    11.00000    0.04714    0.02661 =
         0.04785    0.01019    0.00296   -0.01239
AFIX 137
H31A  2    0.344698    0.559020    0.254036    11.00000   -1.50000
H31B  2    0.351838    0.615874    0.379722    11.00000   -1.50000
H31C  2    0.310693    0.553619    0.392404    11.00000   -1.50000
AFIX   0
C39   1    0.119222    0.594939    0.351732    11.00000    0.04801    0.02280 =
         0.02434    0.00003   -0.00055    0.00117
C40   1    0.087029    0.574492    0.460555    11.00000    0.04852    0.04657 =
         0.03325    0.01595    0.00044   -0.00231
AFIX  43
H40   2    0.099840    0.546538    0.536437    11.00000   -1.20000
AFIX   0
C41   1    0.037347    0.593413    0.461804    11.00000    0.03384    0.05565 =
         0.03493    0.01871    0.00626   -0.00068
AFIX  43
H41   2    0.016358    0.578517    0.537129    11.00000   -1.20000
AFIX   0
C42   1    0.018359    0.634554    0.351479    11.00000    0.03596    0.03332 =
         0.03393   -0.00170   -0.00365    0.00148
C43   1    0.049321    0.656287    0.242200    11.00000    0.04165    0.04823 =
         0.02951    0.01375   -0.00167    0.01320
AFIX  43
H43   2    0.036310    0.684551    0.167033    11.00000   -1.20000
AFIX   0
C44   1    0.099098    0.636908    0.242400    11.00000    0.04557    0.03422 =
         0.02810    0.00778    0.00582    0.00376
AFIX  43
H44   2    0.120000    0.652279    0.167243    11.00000   -1.20000
AFIX   0
C45   1   -0.063628    0.632568    0.447053    11.00000    0.03510    0.05628 =
         0.05698    0.02883    0.00127   -0.00054
AFIX 137
H45A  2   -0.097292    0.649649    0.424894    11.00000   -1.50000
H45B  2   -0.053575    0.651026    0.539742    11.00000   -1.50000
H45C  2   -0.063320    0.579615    0.448535    11.00000   -1.50000
AFIX   0

PART 1
N46A  4    0.400994    0.337198    0.717120    10.70000    0.07366    0.12502 =
         0.12878    0.02815   -0.02517   -0.00007
C47A  1    0.442598    0.344845    0.700029    10.70000    0.11154    0.05857 =
         0.05401   -0.00252   -0.02022    0.02193
C48A  1    0.496879    0.354261    0.683065    10.70000    0.10573    0.08209 =
         0.09011   -0.00088    0.03227   -0.00850
AFIX 131
H48A  2    0.508892    0.322492    0.607613    10.70000   -1.50000
H48B  2    0.513680    0.341897    0.771684    10.70000   -1.50000
H48C  2    0.504105    0.404644    0.658634    10.70000   -1.50000
AFIX   0

PART -2
N46C  4    0.484177    0.485248    0.861794    10.15000    0.08645    0.08118 =
         0.07989    0.00194   -0.00014    0.00237
C47C  1    0.450222    0.480514    0.935793    10.15000    0.08645    0.08118 =
         0.07989    0.00194   -0.00014    0.00237
C48C  1    0.395308    0.469920    0.976771    10.15000    0.08645    0.08118 =
         0.07989    0.00194   -0.00014    0.00237
AFIX 131
H48D  2    0.391855    0.473369    1.079540    10.15000   -1.50000
H48E  2    0.384052    0.422215    0.945130    10.15000   -1.50000
H48F  2    0.374998    0.507421    0.931776    10.15000   -1.50000
AFIX   0

PART -1
N46B  4    0.482468    0.410091    0.733819    10.15000    0.07946    0.07824 =
         0.07907    0.00210    0.00689    0.01314
C47B  1    0.495460    0.456370    0.805462    10.15000    0.07946    0.07824 =
         0.07907    0.00210    0.00689    0.01314
C48B  1    0.492309    0.496354    0.947759    10.15000    0.07946    0.07824 =
         0.07907    0.00210    0.00689    0.01314
AFIX 131
H48G  2    0.515381    0.537400    0.947247    10.15000   -1.50000
H48H  2    0.501298    0.463197    1.024303    10.15000   -1.50000
H48I  2    0.458244    0.513907    0.962279    10.15000   -1.50000
AFIX   0
HKLF 4


REM  AL-03062021_auto in P21212 #18
REM wR2 = 0.1704, GooF = S = 1.060, Restrained GooF = 1.059 for all data
REM R1 = 0.0585 for 6707 Fo > 4sig(Fo) and 0.0705 for all 7781 data
REM 548 parameters refined using 48 restraints

END

WGHT      0.1034      0.0000

REM Highest difference peak  1.501,  deepest hole -1.018,  1-sigma level  0.138
Q1    1   0.2252  0.4443  0.7146  11.00000  0.05    1.50
Q2    1   0.2264  0.4980  0.5671  11.00000  0.05    1.45
Q3    1   0.2237  0.4456  0.4139  11.00000  0.05    1.44
Q4    1   0.2283  0.3931  0.5702  11.00000  0.05    1.33
Q5    1   0.1902  0.4531  0.4981  11.00000  0.05    0.99
;
_shelx_res_checksum                97876
_shelx_hkl_file
;
   0   0  -3 2929.84 234.151   7
   0   0  -4 1032.58 95.1277   7
   0   0  -5 2649.66 222.268   7
   0   0  -6 905.445 92.5170   7
   0   0   7 50.1966 35.9515   1
   0   0   7 51.7745 17.0436   9
   0   0   7 50.1055 16.4844   8
   0   0   7 54.0779 15.0642  10
   0   0   8 4309.36 398.142   1
   0   0   8 4520.12 354.280  10
   0   0   9 7316.72 584.311   1
   0   0   9 6700.37 532.385  10
   0   0  10 1417.60 122.068  10
   0   1   0-2.11623 21.8319   2
   0   1   1 63.8599 11.7033   1
   0  -1  -2 6388.23 490.448   7
   0  -1  -3 2318.49 180.792   7
   0   1  -3 2156.66 183.649   7
   0  -1  -4 7119.31 539.076   7
   0   1  -4 6639.09 543.374   7
   0   1  -5 7918.26 612.312   7
   0  -1  -5 7595.60 604.590   7
   0   1  -6 4687.83 388.070   7
   0   1   6 4792.89 405.969   1
   0   1   7 223.515 52.8643   1
   0   1   7 185.545 26.6907   8
   0  -1   7 226.429 27.8124   8
   0   1   7 211.000 27.9128   9
   0  -1   7 208.317 27.1216  10
   0   1   7 219.036 27.4366  10
   0   1   8 470.803 78.6400   1
   0  -1   8 452.278 82.4106   1
   0  -1   8 445.607 46.7692  10
   0   1   8 422.399 46.4670  10
   0  -1   9 1596.89 174.096   1
   0   1   9 1590.68 169.837   1
   0   1   9 1333.29 126.102  10
   0  -1   9 1556.34 127.248  10
   0   1  10 677.151 66.8424  10
   0  -1  10 696.434 66.7628  10
   0   2   0 25627.7 1988.10   2
   0   2   1 13127.5 1003.96   1
   0   2   2 13718.7 983.872   1
   0  -2  -2 12541.9 973.127   7
   0   2   3 89.7283 25.0189   1
   0  -2  -3 96.1488 15.4682   7
   0   2  -3 66.9303 20.2479   7
   0   2   4 1423.14 125.683   1
   0  -2  -4 1175.31 103.047   7
   0   2  -4 1180.95 113.305   7
   0   2   5 387.076 60.3032   1
   0  -2  -5 291.378 37.6071   7
   0   2  -5 356.764 52.5470   7
   0   2  -6 264.665 45.3651   7
   0   2   6 221.700 48.3745   1
   0   2   6 231.389 28.3250   9
   0   2   6 224.407 27.2148   8
   0   2  -7 47.8756 31.1795   7
   0   2   7 46.7183 36.2644   1
   0   2   7 24.4610 14.5238   8
   0   2   7 25.7959 14.9708   9
   0  -2   7 26.8344 13.9378  10
   0   2   7 23.9604 13.1232  10
   0   2   8 1350.41 151.455   1
   0  -2   8 1313.75 158.814   1
   0   2   8 1263.41 110.522   8
   0   2   8 1173.53 109.618   9
   0  -2   8 1354.77 111.700  10
   0   2   8 1357.68 112.862  10
   0   2   9 2122.65 222.135   1
   0  -2   9 1885.81 225.796   1
   0   2   9 2207.59 184.382  10
   0  -2   9 2330.75 183.437  10
   0  -2  10 744.132 71.2944  10
   0   2  10 788.434 73.8528  10
   0   3   0-22.1103 68.8345   2
   0   3   0 4.86209 8.16099   7
   0   3   1 709.189 66.7315   2
   0   3   2 332.294 39.0582   1
   0   3   3 317.733 42.0859   1
   0   3  -3 279.513 39.9624   7
   0  -3  -3 312.095 28.2113   7
   0   3   4 4749.50 341.554   1
   0  -3  -4 3928.09 315.442   7
   0   3  -4 4060.30 332.687   7
   0   3   5 1090.46 112.292   1
   0   3  -5 937.743 103.503   7
   0   3  -6 263.035 50.6051   7
   0   3   6 309.169 54.6209   1
   0   3   6 269.147 30.7326   9
   0   3   6 232.065 28.7787   8
   0   3  -7 13.7932 30.5355   7
   0  -3   7 11.0665 10.9349  10
   0   3   7 6.14274 11.5543  10
   0   3   7 2.27359 14.3088   9
   0   3   7 12.4179 12.9243   8
   0   3   7 5.20523 29.4184   1
   0  -3   8 59.2636 16.7541  10
   0   3   8 43.4052 17.4742  10
   0   3   8 51.1442 18.0671   8
   0   3   8 83.4799 21.4349   9
   0  -3   9 389.543 43.1663  10
   0   3   9 404.469 46.5362  10
   0  -3   9 275.265 80.1959   1
   0   3   9 450.110 80.5507   1
   0   3  10 99.6653 22.7330  10
   0  -3  10 102.656 20.9370  10
   0   3 -11 82.8941 35.3633   5
   0   4   0 2100.79 186.805   2
   0   4   0 960.223 83.1218   7
   0   4   1 343.059 43.9067   2
   0   4   1 303.241 27.2055   7
   0   4   2 1380.10 122.757   1
   0   4  -2 1480.24 124.153   7
   0   4   3 28.4962 19.3335   1
   0   4  -3 9.64403 19.9520   7
   0   4   4 364.100 52.9922   1
   0   4  -4 306.738 51.0880   7
   0   4   5 48.1588 27.4535   1
   0   4  -5 3.31377 27.7587   7
   0   4  -6 46.2540 34.1432   7
   0   4   6 87.2668 15.9170  10
   0   4   6 78.1432 17.3857   9
   0   4   6 81.5235 36.2679   1
   0  -4   7 792.014 69.5858  10
   0   4   7 739.648 70.2441   9
   0   4  -7 745.747 103.767   7
   0   4   7 758.918 102.145   1
   0  -4   8 119.770 21.4387  10
   0   4   8 110.693 23.8793   9
   0   4   8 104.783 22.3183   8
   0   4   8 69.6114 41.9097   1
   0  -4   9 11.8710 12.8374  10
   0   4  10 19.6244 16.0808  10
   0   4 -11 15.9412 30.4040   5
   0   5   0-0.85483 11.6422   7
   0   5   1 2835.71 221.984   7
   0   5  -1 2875.93 229.986   7
   0   5   1 2982.81 249.149   2
   0   5   2 368.144 48.6491   2
   0   5  -3 71.9087 26.6223   7
   0   5   3 38.4667 22.4000   1
   0   5  -4 45.5377 28.2126   7
   0   5   4 29.6167 25.4536   1
   0   5  -5 251.009 49.9820   7
   0   5   5 185.328 45.0857   1
   0   5   6 441.571 73.3033   1
   0   5   6 528.579 48.5098  10
   0   5   6 450.360 46.8816   8
   0   5  -6 586.917 79.5961   7
   0   5  -7 11.2393 37.3330   7
   0   5   7 5.41155 33.3834   1
   0  -5   7 22.9240 11.3233  10
   0   5   7 16.9202 12.9926  10
   0   5   7 9.37174 13.7541   8
   0   5   7 11.9488 14.7805   9
   0   5   8 65.3411 19.3873  10
   0  -5   8 81.3521 17.9931  10
   0   5   8 45.0205 19.3254   9
   0  -5   9 21.2854 13.6431  10
   0   5 -10 107.673 37.4137   5
   0   5 -11 144.707 44.4634   5
   0   6   0 3196.81 253.828   7
   0   6   1 10220.0 834.939   2
   0   6   1 10306.6 794.845   7
   0   6  -1 10606.7 803.607   7
   0   6   2 560.360 68.4207   2
   0   6   3 457.784 60.8795   2
   0   6  -3 352.707 53.7047   7
   0   6  -4 12.6111 29.8751   7
   0   6  -5 469.184 70.6717   7
   0   6  -6 29.7444 37.4773   7
   0   6   6 60.0751 15.0678   8
   0   6   6 69.1762 15.1762  10
   0   6  -7-18.0890 43.9899   7
   0   6   7 8.11910 11.5828  10
   0   6   7 15.4987 13.6518   8
   0   6   8 522.330 57.0305  10
   0   6  -8 537.539 104.204   7
   0   6   9 1207.41 108.444  10
   0   6 -10 1009.31 105.864   5
   0   6  10 940.299 87.3735  10
   0   7   0-2.55325 15.4241   7
   0   7   1 100.928 17.7547   7
   0   7  -1 100.144 24.6031   7
   0   7   1 158.018 60.9229   2
   0   7  -2 510.657 60.1634   7
   0   7   2 403.966 69.5802   2
   0   7   3 322.605 56.6561   2
   0   7  -4 7713.53 647.814   7
   0   7   4 8593.32 661.092   2
   0   7  -5 4624.89 384.579   7
   0   7   5 4340.40 349.230   9
   0   7   5 5334.60 404.682   2
   0   7   6 1456.81 159.873   2
   0   7   6 1240.45 108.056  10
   0   7  -6 1208.89 141.912   7
   0   7   6 1207.22 107.730   9
   0   7   6 1342.18 107.696   8
   0   7  -7-25.5194 41.6380   7
   0   7   7 30.8402 41.4511   2
   0   7   7 20.9036 14.2072  10
   0   7   7 10.8553 13.9102   8
   0   7   8 61.1000 19.9551  10
   0   7  -8-21.6273 68.9534   7
   0   7   8 40.6873 45.0256   2
   0   7  -9 531.663 76.0656   5
   0   7   9 419.589 49.2964  10
   0   7 -10 551.787 79.2972   5
   0   8   0 16090.7 1237.14   7
   0   8   1 17657.2 1340.62   7
   0   8  -1 18240.2 1351.04   7
   0   8   1 14516.5 1391.27   2
   0   8  -2 4186.67 324.475   7
   0   8   2 3380.94 344.940   2
   0   8   3 505.514 77.6845   2
   0   8  -4 804.089 95.9037   7
   0   8   4 787.580 104.964   2
   0   8   5 77.2465 43.5158   2
   0   8  -5 34.0683 34.4226   5
   0   8   5 27.1134 13.9026   9
   0   8   5 25.0857 12.4500   8
   0   8  -5-18.7914 38.4710   7
   0   8  -6 460.682 68.4437   5
   0   8  -6 357.693 70.3603   7
   0   8   6 367.859 38.7190  10
   0   8   6 301.337 36.4189   8
   0   8   6 347.959 39.3432   9
   0   8   6 381.311 81.8499   2
   0   8  -7 1561.88 157.468   5
   0   8   7 1458.65 125.357  10
   0   8   7 1468.47 123.185   8
   0   8   7 1437.39 124.324   9
   0   8  -7 1475.83 171.703   7
   0   8   7 1282.86 176.319   2
   0   8  -8 1396.08 150.488   5
   0   8   8 1251.39 114.455   9
   0   8   8 1418.57 118.435  10
   0   8  -8 1332.35 171.592   7
   0   8   8 1317.10 179.092   2
   0   8   9 1430.55 124.293  10
   0   8  -9 1412.93 151.661   5
   0   8 -10 694.961 95.7028   5
   0   9   0 3.53430 21.3506   7
   0   9  -1 382.440 53.4858   7
   0   9   1 390.752 43.7051   7
   0   9  -2 187.012 41.1482   7
   0   9   2 103.995 67.2310   2
   0   9  -3 1353.77 134.127   7
   0   9   3 1210.08 154.648   2
   0   9  -4 9963.24 756.693   5
   0   9   4 8545.11 776.511   2
   0   9  -5 8983.79 628.588   5
   0   9   5 7760.77 589.750  10
   0   9  -5 7136.75 626.756   7
   0   9   5 7801.43 589.287   9
   0   9   5 7322.80 587.486   8
   0   9   5 6632.33 645.642   2
   0   9  -6 1794.35 187.616   5
   0   9   6 1977.94 153.546  10
   0   9   6 1867.16 150.820   8
   0   9  -6 1601.71 188.093   7
   0   9   6 1726.43 151.348   9
   0   9   6 1926.85 220.263   2
   0   9  -7 1032.79 129.499   5
   0   9   7 969.342 84.5224  10
   0   9   7 851.484 80.1110   8
   0   9   7 892.950 82.5143   9
   0   9  -7 827.733 125.486   7
   0   9   7 822.966 142.625   2
   0   9  -8 37.2525 55.7503   5
   0   9   8 111.241 22.6831   9
   0   9   8 86.7031 21.3375  10
   0   9  -9 1284.86 168.585   5
   0   9   9 1691.61 134.998   9
   0   9 -10 308.071 68.4415   5
   0  10   0 9491.31 741.327   7
   0  10   1 3377.77 280.838   7
   0  10  -1 3803.73 295.923   7
   0  10  -2 864.612 87.7918   7
   0  10   2 384.730 105.266   2
   0  10  -3 98.2274 37.6524   7
   0  10   3 8.88053 64.1052   2
   0  10  -4 16.5833 55.8051   5
   0  10   4 17.9520 48.2601   2
   0  10  -5 561.319 101.215   5
   0  10   5 510.714 113.790   2
   0  10   5 635.059 57.9720  10
   0  10   5 640.754 56.0345   8
   0  10  -5 665.276 93.9879   7
   0  10   5 548.127 57.0976   9
   0  10  -6 180.950 80.2996   5
   0  10  -6 119.497 54.6679   7
   0  10   6 99.8343 74.7476   2
   0  10   6 164.802 26.1947  10
   0  10   6 200.848 27.7099   9
   0  10   6 158.585 24.2968   8
   0  10  -7 54.5065 64.6663   5
   0  10  -7-13.8816 47.8360   7
   0  10   7 63.0270 19.3360  10
   0  10   7 64.7676 20.1401   9
   0  10   7 46.2713 60.6608   2
   0  10   8 425.255 45.2101   9
   0  10   8 424.552 46.0477  10
   0  10  -9 283.632 80.7207   5
   0  10 -10 541.084 77.9348   5
   0  11   0-9.31905 21.6993   7
   0  11  -1 68.4611 30.9264   7
   0  11   2 19.4711 52.3844   2
   0  11  -2 36.6341 27.2178   7
   0  11   3 1038.34 185.355   2
   0  11   3 1423.96 142.491   5
   0  11  -3 1380.55 165.257   5
   0  11   4 1785.72 233.411   2
   0  11   4 2084.29 157.646  12
   0  11   5 3090.65 381.779   2
   0  11   5 3689.82 294.807   9
   0  11   5 4056.28 293.362   8
   0  11  -6 211.555 103.302   5
   0  11  -6 294.043 75.6227   7
   0  11   6 120.834 91.2630   2
   0  11   6 293.954 38.0062  10
   0  11   6 422.198 41.2923   9
   0  11   6 354.907 37.1223   8
   0  11  -7 27.7119 43.0088   7
   0  11  -7 49.8203 79.4650   5
   0  11   7 81.5467 20.9929   9
   0  11   7 13.8330 68.4114   2
   0  11   8 456.195 45.7478   9
   0  11  -8 188.825 91.6901   5
   0  12   0 1473.82 142.372  12
   0  12   0 1468.04 147.476   5
   0  12   0 1926.87 151.158   7
   0  12  -1-12.5351 29.4272   5
   0  12   1-5.12097 24.2501   5
   0  12  -1-6.14595 30.5218  12
   0  12   1 5.93676 29.3818  12
   0  12  -1 10.0051 23.6223   7
   0  12   2 111.922 33.7724   5
   0  12  -2 40.0753 38.3524   5
   0  12   2 66.8069 32.6996  12
   0  12  -2 54.7755 32.8058  12
   0  12  -2 85.8482 37.1067   7
   0  12   3 204.180 93.0373   2
   0  12  -3 325.334 52.0420  12
   0  12   3 270.976 47.4287  12
   0  12  -3 290.041 73.8491   5
   0  12   3 273.695 55.3483   5
   0  12  -3 499.148 71.9926   7
   0  12   4-10.3773 30.7233  12
   0  12  -4-28.0264 65.8008   5
   0  12  -4-11.1580 39.5279   7
   0  12   4-13.8519 68.3248   2
   0  12  -5 137.116 55.6696   7
   0  12  -5 25.7043 82.7218   5
   0  12   5 180.743 25.7417   9
   0  12   5 46.6496 88.6909   2
   0  12  -6 104.214 92.1248   5
   0  12   6 65.6901 20.0639   9
   0  12   6 81.4415 100.550   2
   0  12   7 123.186 22.7327   9
   0  12  -7-52.8863 95.1234   5
   0  12   8 442.603 41.8440   9
   0  12  -8 33.1616 78.9274   5
   0  12  -9 225.033 56.8349   5
   0  13   0 2.77164 26.0266   5
   0  13   0-16.3358 33.3091  12
   0  13   0 2.82391 23.8708   7
   0  13  -1 65.4180 33.2215   5
   0  13   1 78.2726 33.0694   5
   0  13  -1 87.8758 35.9649  12
   0  13   1 64.1717 33.2191  12
   0  13  -1 151.313 40.7010   7
   0  13   2 5.72530 28.6777   5
   0  13  -2 7.59715 34.0997   5
   0  13  -2-2.41424 34.5891  12
   0  13   2-22.6556 33.9860  12
   0  13  -2-9.00871 34.6862   7
   0  13   3 43.7012 33.2590   5
   0  13  -3 19.6164 45.7248   5
   0  13  -3 57.1285 37.8459  12
   0  13   3 31.6516 32.7295  12
   0  13  -3 10.5930 37.6039   7
   0  13   4 23.2384 35.2231  12
   0  13  -4 6.42691 59.8361   5
   0  13  -4 11.9739 35.4160   7
   0  13   4-14.9540 71.4182   2
   0  13  -5 136.570 56.6135   7
   0  13  -5 159.585 82.4478   5
   0  13   5 151.537 24.9553   9
   0  13   5 33.4810 83.2805   2
   0  13  -6 197.472 98.2241   5
   0  13   6 253.803 31.9535   9
   0  13   6 156.004 108.471   2
   0  13  -7 580.185 117.209   5
   0  13   7 589.763 56.5200   9
   0  13  -8 62.4483 54.4692   5
   0  13   8 17.7265 14.4530   9
   0  13  -9 21.8095 30.1110   5
   0  14   0 317.330 58.2934  12
   0  14   0 318.714 51.1396   5
   0  14  -1 1440.85 137.428  12
   0  14   1 1273.72 132.694  12
   0  14   1 1468.42 135.032   5
   0  14  -1 1321.48 135.459   5
   0  14  -1 1479.91 144.588   7
   0  14   2 26.9830 30.0457   5
   0  14  -2 18.1008 32.8138   5
   0  14  -2 35.5330 41.0101  12
   0  14   2 10.3038 37.9922  12
   0  14  -2-14.6103 40.2921   7
   0  14   3 66.0267 39.5852   5
   0  14  -3 17.9365 42.5443   5
   0  14   3 12.6631 37.0357  12
   0  14  -3 27.5148 41.9034  12
   0  14  -3 45.5452 41.0099   7
   0  14  -4 11.3960 42.5916  12
   0  14   4-7.65784 36.9743  12
   0  14  -4-37.9100 52.2612   7
   0  14   4 3.17808 13.8256   9
   0  14  -4-22.6276 55.3628   5
   0  14  -5-13.3260 51.3062   7
   0  14   5 1.13253 14.1032   9
   0  14  -5-6.70237 59.0174   5
   0  14   6 196.029 28.0249   9
   0  14  -6 173.364 76.4612   5
   0  14  -7 17.1816 58.2469   5
   0  14  -8 40.7439 42.7108   5
   0  15   0 5.68909 28.9260   5
   0  15   0-33.5749 46.2486  12
   0  15  -1 170.158 42.9938   5
   0  15   1 179.647 41.6623   5
   0  15  -1 178.295 54.9791  12
   0  15   2 9.18420 28.4992   5
   0  15  -2 31.0132 35.2939   5
   0  15   2 20.1420 43.3081  12
   0  15  -2-12.1574 45.1268  12
   0  15  -2-25.3562 46.3731   7
   0  15  -3 241.210 55.8342   5
   0  15   3 333.001 58.0267   5
   0  15   3 226.351 53.0604  12
   0  15  -3 279.001 59.3637  12
   0  15  -3 94.7218 61.0933   7
   0  15  -4 724.642 92.9644  12
   0  15   4 519.039 82.1714  12
   0  15  -4 576.576 92.9426   5
   0  15  -4 646.200 105.044   7
   0  15   4 694.765 60.9814   9
   0  15  -5 1004.59 128.925   5
   0  15  -6 413.487 80.8679   5
   0  15  -7 140.653 49.8162   5
   0  15  -8 84.8863 33.4942   5
   0  16   0 3612.32 282.216  12
   0  16   0 2877.97 265.991   5
   0  16  -1 1281.44 127.444  12
   0  16   1 1170.43 115.000   5
   0  16  -1 953.221 110.559   5
   0  16  -2 133.548 42.2798   5
   0  16   2 101.204 39.0121   5
   0  16   2 116.731 52.7865  12
   0  16  -2 116.058 58.9171  12
   0  16  -3 377.980 69.3866   5
   0  16   3 456.140 73.0175  12
   0  16  -3 591.542 80.6580  12
   0  16   3 627.450 76.3206   5
   0  16  -3 470.311 88.1684   7
   0  16  -4 33.2036 41.5773   5
   0  16   4-39.4738 45.3305  12
   0  16  -4-8.96945 46.1933  12
   0  16  -5 218.294 59.5757   5
   0  16  -6 118.774 47.6835   5
   0  16  -7 127.969 40.6256   5
   0  17   0-13.7600 26.5170   5
   0  17   0-3.67264 51.0403  12
   0  17   1 136.923 38.2077   5
   0  17  -1 141.240 37.1558   5
   0  17  -1 69.5603 60.1657  12
   0  17  -2 791.520 98.0822  12
   0  17   2 673.563 92.0511  12
   0  17   2 699.902 80.7486   5
   0  17  -2 559.637 76.2776   5
   0  17   3 1640.65 160.606  12
   0  17  -3 1740.61 163.820  12
   0  17   3 1753.84 159.510   5
   0  17  -3 1445.54 153.894   5
   0  17  -4 1498.78 146.847  12
   0  17  -4 1441.50 145.942   5
   0  17  -5 1687.37 162.728   5
   0  17  -6 1064.34 110.453   5
   0  17  -7 11.8288 22.0305   5
   0  18   0 1824.91 164.259  12
   0  18   0 1287.73 132.972   5
   0  18  -1 1882.72 173.872  12
   0  18  -1 1549.24 151.345   5
   0  18   1 1664.87 153.599   5
   0  18   2 354.877 72.6606  12
   0  18  -2 389.982 75.8180  12
   0  18  -2 350.835 54.7816   5
   0  18   2 386.403 56.0875   5
   0  18  -3 11.3453 27.5375   5
   0  18  -3 3.15052 48.9834  12
   0  18   3-39.7967 52.7095  12
   0  18  -4 62.4626 32.8094   5
   0  18  -5 282.056 48.8601   5
   0  18  -6 207.708 37.3256   5
   0  19   0 4.68896 21.6380   5
   0  19   0 19.2430 58.5066  12
   0  19  -1 61.3003 27.8359   5
   0  19   1 31.4112 26.4139   5
   0  19  -1 101.995 67.4425  12
   0  19   2 20.2868 27.1899   5
   0  19  -2 47.3386 29.2881   5
   0  19  -2 44.4732 56.6458  12
   0  19   2 19.9212 51.5174  12
   0  19  -3 410.796 55.0465   5
   0  19  -4 811.291 84.4832   5
   0  19  -5 627.920 67.9267   5
   0  20   0 154.944 33.9560   5
   0  20   0 144.454 61.0173  12
   0  20  -1 196.795 36.9892   5
   0  20   1 230.556 40.1285   5
   0  20  -1 265.132 72.9675  12
   0  20   2 249.167 43.7336   5
   0  20  -2 227.303 39.4167   5
   0  20  -3 26.9116 23.1916   5
   0  20  -4 34.5457 22.1860   5
   0  20  -5 129.915 25.5763   5
   0  21   0 10.5726 20.7417   5
   0  21  -1 39.1150 23.2038   5
   0  21   1 27.1155 23.7233   5
   0  21  -2 17.6786 18.1033   5
   0  21  -3 25.0437 18.7976   5
   0  22   0 41.0428 19.1310   5
   0  22  -1 5.39532 16.3003   5
   1   0   0 2.13764 1.86505   6
   1   0  -1 97.3213 12.1913   7
   1   0  -2 383.479 37.9692   7
   1   0  -3 427.305 44.8612   7
   1   0  -4 707.430 69.8977   7
  -1   0  -4 695.867 70.3372   7
  -1   0  -5 211.607 37.3701   7
   1   0  -5 234.761 37.6187   7
   1   0  -6 125.526 31.6854   7
  -1   0  -6 134.638 32.2713   7
   1   0   6 169.583 24.1278   4
  -1   0   7 87.6274 40.0492   1
   1   0   7 111.989 46.8889   1
   1   0   7 106.048 19.3688   8
  -1   0   7 104.533 20.5241   9
  -1   0   7 85.9144 18.3252   8
   1   0   7 91.7029 18.0331  10
  -1   0   8 320.685 75.0275   1
   1   0   8 453.882 81.5951   1
  -1   0   8 399.804 42.8439   8
   1   0   8 380.138 44.0285  10
  -1   0   8 409.462 44.2099  10
   1   0   9 389.991 86.0855   1
  -1   0   9 389.859 85.5650   1
  -1   0   9 544.044 53.6992  10
   1   0   9 487.180 53.3079  10
   1   0  10 53.5552 18.4473  10
  -1   0  10 40.2437 16.3384  10
   1  -1  10 447.726 48.1557  10
  -1   1  10 431.647 47.9490  10
   1  -1   9 632.643 110.262   1
  -1   1   9 730.403 111.564   1
  -1   1   9 811.093 75.4446  10
   1  -1   9 803.708 74.6382  10
   1  -1   8 52.7082 42.3791   1
  -1   1   8 11.6862 38.3080   1
  -1   1   8 61.1437 18.7788   8
   1  -1   8 50.9533 16.5471  10
  -1   1   8 47.0318 17.4653  10
  -1   1   7 251.544 58.9336   1
  -1   1   7 303.529 34.7225   9
   1  -1   7 299.375 33.8408  10
  -1   1   7 298.531 33.8962   8
   1  -1   6 253.244 32.0148   4
   1   1  -6 254.124 43.6704   7
  -1   1   6 337.810 57.9944   1
   1   1  -5 111.677 30.5561   7
  -1  -1  -5 93.0299 25.3708   7
   1   1  -4 944.648 86.8920   7
  -1  -1  -4 811.228 79.4734   7
   1   1  -3 1030.85 92.4850   7
   1   1  -2 97.8838 18.4382   7
  -1   1   1 2848.54 210.083   1
   1   1  -1 2538.71 208.588   7
  -1   1   0 7161.25 564.781   2
   1  -1  -1 3036.12 233.379   7
   1  -1  -2 111.755 16.5363   7
   1  -1  -3 1005.30 86.6267   7
  -1   1  -4 783.022 79.4332   7
   1  -1  -4 776.889 73.8374   7
   1  -1  -5 72.3146 25.0162   7
  -1   1  -5 87.9683 31.0053   7
  -1   1  -6 313.672 48.9383   7
   1   1   6 269.254 54.4976   1
   1   1   7 234.795 57.7755   1
   1   1   7 267.075 32.2747   8
  -1  -1   7 312.160 33.1897   8
   1   1   7 275.940 33.0338   9
   1   1   7 258.822 31.9406  10
  -1  -1   8 25.5274 41.8558   1
   1   1   8 35.8730 37.8307   1
  -1  -1   8 54.3125 16.8808  10
   1   1   8 69.6322 19.0567  10
  -1  -1   9 647.116 63.9561  10
   1   1   9 700.518 65.5410  10
   1   1  10 349.887 43.8087  10
  -1  -1  10 435.717 44.7790  10
   1  -2  10-2.62724 12.6663  10
  -1   2  10 32.5864 18.3655  10
  -1   2   9 105.911 49.6720   1
   1  -2   9 176.379 66.0763   1
  -1   2   9 200.106 30.5744  10
   1  -2   9 204.436 29.7965  10
   1  -2   8 717.864 108.242   1
  -1   2   8 606.159 92.0536   1
  -1   2   8 572.410 58.0302   8
  -1   2   8 563.095 57.9891   9
  -1   2   8 606.101 59.4247  10
   1  -2   8 621.645 59.1171  10
  -1   2   7 1629.56 163.670   1
  -1   2   7 1467.14 125.642   8
   1   2  -7 1582.19 153.425   7
   1  -2   7 1517.06 125.886  10
  -1   2   7 1548.27 126.938  10
  -1   2   7 1446.99 125.653   9
  -1   2   6 830.366 99.8322   1
  -1   2   6 768.173 70.5685   9
   1   2  -6 846.305 93.0540   7
  -1   2   6 813.538 70.7489   8
  -1  -2  -5 169.946 28.1245   7
  -1   2   5 236.054 44.9072   1
   1   2  -5 214.616 42.2809   7
  -1   2   4 341.317 53.6241   1
   1   2  -4 251.796 42.7150   7
  -1  -2  -4 336.998 35.7930   7
  -1   2   3 1137.80 101.401   1
  -1  -2  -3 994.889 86.1080   7
   1   2  -3 1069.31 95.0013   7
  -1   2   2 2316.77 182.028   1
   1   2  -2 2126.50 178.582   7
  -1   2   1 2608.93 208.498   1
   1   2  -1 2700.36 209.064   7
  -1   2   0 31505.2 2432.03   2
   1  -2  -2 2353.99 183.173   7
   1   2   3 1240.82 112.936   1
   1  -2  -3 1190.35 99.2945   7
   1   2   4 238.239 44.4044   1
  -1   2  -4 240.400 39.5336   7
   1  -2  -4 248.125 31.2044   7
   1  -2  -5 160.399 26.4520   7
  -1   2  -5 146.105 36.8973   7
   1   2   5 178.656 41.0403   1
   1   2   6 683.027 92.4467   1
  -1   2  -6 868.049 92.7165   7
   1   2   6 688.254 66.7720   8
   1   2   6 824.106 68.5560  10
   1   2   6 795.099 68.9341   9
   1   2   7 1876.85 178.622   1
  -1   2  -7 1756.93 167.694   7
  -1  -2   7 1702.90 138.508   8
   1   2   7 1549.12 138.201   8
   1   2   7 1713.09 139.589  10
   1   2   7 1681.55 139.146   9
   1   2   8 394.268 80.8183   1
  -1  -2   8 561.534 94.5774   1
   1   2   8 533.165 53.6500  10
  -1  -2   8 521.106 52.6721  10
  -1  -2   9 222.877 68.7365   1
   1   2   9 236.645 34.3608  10
  -1  -2   9 264.569 33.9911  10
   1   2  10 16.7017 17.8958  10
  -1  -2  10 14.0381 15.0547  10
   1  -3  10 339.764 38.7352  10
  -1   3  10 349.026 41.2844  10
  -1   3   9 286.794 68.0333   1
   1  -3   9 347.286 84.7912   1
   1  -3   9 384.762 42.4191  10
  -1   3   9 375.719 44.0153  10
  -1   3   8 1533.16 172.266   1
  -1   3   8 1686.49 136.290  10
   1  -3   8 1729.02 135.368  10
  -1   3   8 1452.89 132.822   9
  -1   3   8 1549.47 133.832   8
   1   3  -7-4.54237 31.1880   7
  -1   3   7 15.4530 31.7601   1
   1  -3   7-1.11567 10.5785  10
  -1   3   7 19.4699 13.6277   8
  -1   3   7 7.98001 14.4807   9
   1   3  -6-3.77821 26.3661   7
  -1   3   6 21.9279 27.0503   1
  -1   3   6 8.79722 13.6613   9
  -1   3   6 13.6240 11.8473   8
  -1   3   5 1497.46 140.845   1
   1   3  -5 1288.34 132.587   7
  -1   3   4 2744.37 203.858   1
  -1  -3  -4 2108.89 177.174   7
   1   3  -4 2367.99 195.546   7
  -1   3   3 306.779 40.8603   1
  -1  -3  -3 287.874 26.9357   7
   1   3  -3 261.787 38.9148   7
  -1   3   2 383.982 42.0407   1
   1   3  -2 353.831 41.0972   7
  -1   3   1 11513.1 886.754   2
  -1   3   0 245.302 81.5308   2
   1   3   0 130.829 17.6512   7
   1   3   3 500.042 57.6525   1
   1   3   4 2501.89 200.720   1
   1  -3  -4 2148.25 176.406   7
  -1   3  -4 2320.68 194.548   7
   1   3   5 960.011 106.368   1
  -1   3  -5 957.799 103.487   7
   1   3   6 39.7093 30.8128   1
  -1   3  -6 15.5370 27.1358   7
   1   3   6 15.7752 11.7690   8
   1   3   6 23.5241 13.2730   9
  -1   3  -7-18.7818 30.6380   7
   1   3   7 4.92028 11.9494  10
  -1  -3   7-1.11335 10.7294  10
   1   3   7 10.0877 12.2905   8
   1   3   7 15.9503 15.5851   9
   1   3   7 31.2452 31.4586   1
   1   3   8 1326.55 121.627   9
  -1  -3   8 1494.63 122.872  10
   1   3   8 1618.20 125.815  10
   1   3   8 1166.79 154.990   1
  -1  -3   9 407.556 44.0553  10
   1   3   9 377.520 45.9696  10
  -1  -3   9 466.138 91.3516   1
   1   3  10 375.081 45.3206  10
  -1  -3  10 405.669 42.3444  10
  -1   3 -11 288.590 49.0483   5
  -1   4  10 81.8023 21.2658  10
   1  -4   9 600.426 59.4646  10
  -1   4   8 464.239 82.0331   1
  -1   4   8 506.582 52.3204   8
   1  -4   8 517.648 51.8429  10
  -1   4   8 508.721 52.3440   9
  -1   4   7 621.020 86.6885   1
  -1   4   7 541.592 53.0342   9
   1  -4   7 487.316 50.7994  10
   1   4  -7 657.373 88.8644   7
   1   4  -6 230.166 52.2706   7
  -1   4   6 324.472 57.5298   1
  -1   4   6 291.560 32.7569   9
  -1   4   5 77.5995 30.1324   1
   1  -4   5 81.5079 18.5848   4
   1   4  -5 72.4886 32.8011   7
  -1   4   4 59.6481 25.2972   1
   1   4  -4 38.3455 27.7395   7
  -1   4   3 2746.91 220.968   1
   1   4  -3 2520.32 218.861   7
  -1   4   2 1034.49 95.2347   1
   1   4  -2 1098.66 96.6922   7
  -1   4   1 4648.92 333.652   2
  -1   4   1 4032.24 314.382   7
  -1   4   0 961.077 135.083   2
   1   4   0 526.586 49.1978   7
   1   4   1 5063.98 386.220   6
   1   4   1 5056.06 388.710   7
  -1   4  -4 46.1290 29.5075   7
   1   4   4 45.2474 26.5526   1
  -1   4  -5 23.5545 29.9948   7
   1   4   5 18.4456 23.7320   1
   1   4   5 31.7527 13.1769   4
   1   4   6 442.879 71.3776   1
   1   4   6 468.753 45.1477  10
  -1   4  -6 394.060 69.1423   7
  -1  -4   7 427.858 42.1910  10
   1   4   7 380.486 42.7287   9
  -1   4  -7 423.791 76.4316   7
   1   4   7 355.385 69.7587   1
   1   4   8 345.238 41.4728   9
  -1  -4   8 398.912 41.1983  10
  -1  -4   9 528.775 52.6950  10
   1   4  10 38.0608 17.8225  10
  -1  -4  10 35.1985 13.2263  10
  -1   4 -11 139.086 40.8844   5
  -1   5   9 139.958 25.0199   9
   1  -5   9 134.902 23.1991  10
  -1   5   8 269.886 34.9763  10
  -1   5   8 275.248 35.6772   9
   1  -5   8 290.416 34.5151  10
   1   5  -8 246.213 71.4719   7
   1   5  -7 44.7095 45.2457   7
  -1   5   7-10.7560 33.2361   1
  -1   5   7 31.3895 16.3348   9
  -1   5   7 33.9312 14.3082  10
   1  -5   7 41.7710 14.5168  10
  -1   5   6 747.884 95.6093   1
  -1   5   6 660.850 63.3724   8
  -1   5   6 708.566 64.5812   9
   1   5  -6 818.017 97.3918   7
  -1   5   5 273.916 49.1103   1
   1   5  -5 180.835 44.6655   7
  -1   5   4 1149.40 114.863   1
   1   5  -4 1090.61 112.939   7
  -1   5   3 4252.79 361.455   1
   1   5  -3 4736.09 364.224   7
  -1   5   2 2582.89 217.898   2
  -1   5   1 1368.37 124.472   2
  -1   5   1 1159.46 96.4281   7
   1   5  -1 1300.93 105.610   7
   1   5   0 4055.72 317.304   7
   1   5   1 1432.29 110.815   6
   1   5   1 1430.52 114.900   7
  -1   5  -3 4609.05 373.130   7
  -1   5  -4 1028.16 99.0580   7
   1   5   4 776.996 93.5531   1
  -1   5  -5 346.315 57.8882   7
   1   5   5 388.000 60.7314   1
   1   5   6 683.636 94.5922   1
   1   5   6 809.458 67.5475  10
  -1   5  -6 789.826 98.7086   7
   1   5   6 675.996 65.3661   8
  -1   5  -7 28.4569 38.5412   7
   1   5   7 5.40341 32.0778   1
  -1  -5   7 32.4132 12.8843  10
   1   5   7 48.7658 16.0917  10
   1   5   7 42.7904 15.2892   8
  -1   5  -8 274.260 77.0811   7
  -1  -5   8 307.421 33.7874  10
   1   5   8 240.523 34.4983   9
   1   5   8 268.555 36.2605  10
  -1  -5   9 270.049 32.6846  10
  -1   5 -10 353.861 56.3924   5
  -1   5 -11 405.758 63.5008   5
  -1   6  10 81.1921 20.8048  10
  -1   6   9 966.860 83.7857  10
  -1   6   9 805.178 78.8045   9
  -1   6   8 1188.65 150.892   2
   1   6  -8 1103.30 146.613   7
  -1   6   8 990.098 92.2974   8
  -1   6   8 1053.48 94.3529  10
  -1   6   8 1036.16 92.7938   9
   1   6  -7 426.906 84.6321   7
  -1   6   7 277.440 36.8201   8
  -1   6   7 380.889 39.8566  10
   1   6  -6 247.060 59.0791   7
  -1   6   6 206.553 27.9158   8
  -1   6   6 247.102 28.7814  10
   1   6  -5 972.359 109.680   7
   1   6  -4 904.258 100.544   7
  -1   6   3 75.1509 30.7538   2
   1   6  -3 47.1851 30.8196   7
  -1   6   2 886.871 94.2476   2
  -1   6   1 5018.12 420.189   2
   1   6  -1 5154.99 389.350   7
  -1   6   1 4810.63 379.571   7
  -1   6   0 12919.3 964.622   7
   1   6   0 12198.5 964.551   7
   1   6   1 4537.89 375.644   7
   1   6   1 4944.55 370.519   6
  -1   6  -3 12.3388 24.7373   7
  -1   6  -4 861.323 97.3004   7
  -1   6  -5 867.386 103.495   7
   1   6   6 209.638 26.5853  10
   1   6   6 192.153 25.5830   8
   1   6   6 219.783 27.7531   9
  -1   6  -6 144.952 49.7648   7
   1   6   7 386.728 42.9008  10
   1   6   7 402.072 42.2117   8
  -1   6  -7 334.697 75.9748   7
  -1   6  -8 989.920 136.472   7
   1   6   8 857.756 82.7501  10
   1   6   9 814.185 79.2214  10
  -1   6 -10 71.4471 37.8241   5
  -1   7   9 191.196 28.7408   9
  -1   7   9 156.387 28.8138  10
   1   7  -8 413.559 93.9882   7
  -1   7   8 493.804 93.1452   2
  -1   7   8 395.212 47.9741  10
  -1   7   8 473.893 47.5758   8
   1   7  -7 191.122 59.1588   7
  -1   7   7 230.920 68.1412   2
  -1   7   7 195.871 28.2724   8
  -1   7   7 200.600 28.5473  10
  -1   7   6 1108.36 98.9270   9
   1   7  -6 1047.09 130.290   7
  -1   7   6 1197.23 98.7966   8
  -1   7   6 1120.55 98.7946  10
  -1   7   5 3371.58 299.826   2
   1   7  -5 3092.59 285.108   7
  -1   7   4 1111.80 122.748   2
   1   7  -4 1002.14 112.372   7
  -1   7   3 997.604 110.943   2
  -1   7   2 2518.31 246.433   2
   1   7  -2 2920.14 233.806   7
  -1   7   1 481.650 92.2156   2
  -1   7   1 472.110 45.8576   7
   1   7  -1 547.434 56.9444   7
  -1   7   0 5.11965 14.4704   7
   1   7   0 6.54972 16.1576   7
  -1   7  -1 656.199 68.3355   7
   1   7   1 645.739 59.9594   7
   1   7   1 659.120 52.0936   6
  -1   7  -2 3000.17 251.298   7
  -1   7  -4 929.663 104.914   7
  -1   7  -5 2873.80 261.018   7
   1   7   6 1117.81 93.3604  10
   1   7   6 952.335 91.5187   9
   1   7   6 1116.02 91.7142   8
  -1   7  -6 1127.26 128.767   7
   1   7   7 160.016 26.3931   9
   1   7   7 175.775 27.2901  10
   1   7   7 166.275 25.3657   8
  -1   7  -7 166.522 59.9240   7
  -1   7  -8 535.524 106.371   7
   1   7   8 525.600 56.4046  10
   1   7   9 137.742 26.7584  10
  -1   7  -9 126.245 46.0912   5
  -1   7 -10 298.970 60.1764   5
  -1   8   9 459.559 50.2556  10
  -1   8   8 179.674 29.8379  10
   1   8  -8 94.8292 76.4640   7
   1   8  -7 13.3262 41.1455   7
  -1   8   7 33.9717 48.0455   2
  -1   8   7 28.1563 15.8933  10
  -1   8   7 34.5986 16.0069   8
  -1   8   7 33.5715 18.3642   9
   1   8  -6 22.6972 40.2119   7
  -1   8   6 14.3865 12.1671  10
  -1   8   6 18.6262 13.4348   8
  -1   8   6 16.6584 15.6482   9
  -1   8   6 22.9426 38.8997   2
  -1   8   5 506.591 47.0477   8
   1   8  -5 446.553 75.4399   7
  -1   8   5 394.490 81.8467   2
   1   8  -4 384.197 62.0115   7
  -1   8   4 354.945 67.1631   2
  -1   8   3 144.372 49.5608   2
   1   8  -2 623.624 73.8830   7
  -1   8   2 610.502 95.9298   2
   1   8  -1 564.554 65.9975   7
  -1   8   1 563.712 54.1408   7
  -1   8   1 503.823 103.358   2
  -1   8   0 2721.62 224.337   7
   1   8   0 2768.44 225.090   7
   1   8   1 420.493 45.9956   7
  -1   8  -1 418.592 54.5908   7
  -1   8  -2 560.151 69.1928   7
  -1   8  -4 384.154 63.1413   7
  -1   8  -5 632.188 75.0785   5
   1   8   5 467.452 47.7112   9
   1   8   5 514.024 47.3749   8
  -1   8  -5 472.250 78.7156   7
  -1   8  -6 101.770 42.6147   5
   1   8   6 40.8712 14.8909  10
   1   8   6 29.2563 13.7611   8
   1   8   6 39.8430 16.2656   9
  -1   8  -6 34.0709 37.8168   7
  -1   8  -7 72.7271 46.4977   5
   1   8   7 17.9589 16.2788  10
   1   8   7 31.5915 17.3613   9
   1   8   7 14.3055 14.3494   8
  -1   8  -7 19.9261 46.3581   7
   1   8   8 200.237 29.2770   9
   1   8   8 167.486 28.9286  10
  -1   8  -8 214.698 59.4763   5
   1   8   9 357.900 44.0359  10
  -1   8  -9 365.897 69.8018   5
  -1   8 -10 27.4103 45.8513   5
  -1   9   9 538.919 55.6483  10
  -1   9   8 235.316 33.6929  10
  -1   9   8 278.216 35.2246   9
   1   9  -7 6.86398 48.6229   7
  -1   9   7-29.7709 48.9484   2
  -1   9   7 1.44146 13.4355  10
  -1   9   7 23.3138 18.0670   9
  -1   9   7 12.2362 14.0077   8
   1   9  -6 162.539 54.2937   7
  -1   9   6 199.768 74.3513   2
  -1   9   6 162.448 24.3471   8
  -1   9   6 148.066 24.9553   9
  -1   9   6 148.405 23.8873  10
  -1   9   5 887.154 128.414   2
   1   9  -5 776.539 104.454   7
  -1   9   5 830.044 71.7682   8
  -1   9   5 785.684 71.4940  10
  -1   9   4 1455.05 171.125   2
  -1   9   3 272.526 69.7425   2
   1   9  -3 336.308 55.0268   7
  -1   9   2 1197.48 170.147   2
   1   9  -2 1589.56 141.690   7
   1   9  -1 156.789 34.8457   7
  -1   9   1 112.949 23.5116   7
   1   9   0 1389.69 118.832   7
  -1   9   0 1225.58 116.557   7
  -1   9  -1 100.263 33.2545   7
   1   9   1 108.377 24.3393   7
  -1   9  -2 1558.32 147.861   7
  -1   9  -3 358.427 60.2636   7
  -1   9  -4 2025.89 192.852   5
   1   9   5 760.920 71.4353  10
   1   9   5 799.506 70.0568   8
   1   9   5 801.620 70.9537   9
  -1   9  -5 678.525 100.612   7
  -1   9  -6 161.963 61.9322   5
   1   9   6 158.341 24.6824  10
   1   9   6 171.857 26.1030   9
   1   9   6 154.930 23.7050   8
  -1   9  -6 113.968 49.4130   7
  -1   9  -7 5.18927 52.7817   5
   1   9   7 20.2594 14.8277  10
   1   9   7 28.0844 17.0120   9
  -1   9  -7-20.4308 42.8407   7
  -1   9  -8 203.864 75.5911   5
   1   9   8 182.835 31.0615  10
   1   9   8 229.088 30.8729   9
  -1   9  -9 436.363 85.0734   5
  -1   9 -10 111.654 52.7206   5
  -1  10   9 56.8236 18.2893   9
  -1  10   8 295.703 38.1387  10
  -1  10   8 351.910 39.7426   9
   1  10  -7 48.9170 55.6299   7
  -1  10   7 150.661 81.1478   2
  -1  10   7 100.677 19.7984   8
  -1  10   7 99.0760 23.1784   9
  -1  10   7 83.7777 21.4457  10
  -1  10   6 579.567 121.056   2
  -1  10   6 492.953 49.2062   8
  -1  10   6 502.799 52.0502   9
   1  10  -6 658.726 98.9473   7
  -1  10   6 474.505 50.6116  10
  -1  10   5 514.154 109.667   2
   1  10  -5 595.495 88.7006   7
  -1  10   5 532.908 51.0190   8
  -1  10   4 641.786 114.269   2
   1  10  -3 291.075 56.2643   7
  -1  10   3 241.082 79.8520   2
   1  10  -2 152.977 38.1461   7
  -1  10   2 26.2370 52.2343   2
  -1  10   1 853.998 75.6941   7
   1  10  -1 717.843 85.6080   7
  -1  10   0 332.712 44.6147   7
   1  10   0 278.979 42.3886   7
  -1  10  -1 822.193 89.2145   7
   1  10   1 844.431 79.0119   7
  -1  10  -2 154.128 40.9118   7
  -1  10  -3 332.353 60.6886   7
  -1  10  -4 711.688 107.362   5
  -1  10  -5 504.455 99.8166   5
   1  10   5 605.701 57.0027  10
  -1  10  -5 585.625 91.1867   7
   1  10   5 592.082 54.1035   8
   1  10   5 574.916 55.4873   9
  -1  10  -6 436.825 99.9116   5
   1  10   6 502.027 50.7096  10
   1  10   6 526.294 47.6873   8
   1  10   6 391.491 47.0449   9
  -1  10  -6 444.857 87.0890   7
  -1  10  -7 20.6515 69.9983   5
   1  10   7 123.833 24.4867  10
   1  10   7 119.704 23.2133   9
  -1  10  -7 89.3031 50.8320   7
  -1  10  -8 85.0920 74.9294   5
   1  10   8 318.182 36.3721   9
  -1  10  -9 27.1841 57.7038   5
  -1  10 -10 125.474 47.3421   5
  -1  11   9 52.8265 15.7297   9
  -1  11   8 66.6157 20.0098   9
   1  11  -7 82.0625 84.9277   5
   1  11  -7 132.386 58.2751   7
  -1  11   7 124.825 91.3067   2
  -1  11   7 145.866 25.4528  10
  -1  11   7 197.498 28.8093   9
   1  11  -6 125.839 88.8173   5
   1  11  -6 138.567 60.2209   7
  -1  11   6 171.649 26.9229  10
  -1  11   6 199.496 26.0333   8
  -1  11   6 178.828 28.4167   9
  -1  11   6 110.431 84.4816   2
  -1  11   5-25.7572 65.5432   2
   1  11  -5 100.547 80.9779   5
  -1  11   5 49.4618 18.1592   9
  -1  11   5 36.0007 13.8112   8
  -1  11   4 106.505 82.3246   2
  -1  11   4 173.951 38.8599  12
   1  11  -4 206.114 53.3057   7
   1  11  -3 1304.23 131.724   7
  -1  11   3 1201.25 115.913   5
   1  11  -2 1023.86 107.697   7
  -1  11   2 779.896 143.341   2
   1  11  -1 300.007 49.6174   7
  -1  11   0 399.492 50.7612   7
   1  11   0 349.684 49.7128   7
  -1  11  -1 351.963 55.1411   7
  -1  11  -2 826.023 95.5109   7
  -1  11  -3 1395.43 136.465   7
  -1  11  -3 1016.20 140.635   5
   1  11   4 153.884 35.1205  12
  -1  11  -4 47.9572 65.3073   5
  -1  11  -4 194.707 50.9995   7
  -1  11  -5-7.77894 76.7632   5
   1  11   5 40.2148 16.3950   9
   1  11   5 23.4454 12.4247   8
  -1  11  -6 161.980 95.9045   5
   1  11   6 310.846 36.3961   9
  -1  11  -6 220.176 66.9704   7
   1  11   7 169.694 26.4014   9
  -1  11  -7 83.7805 89.6716   5
  -1  11  -7 123.049 57.1861   7
   1  11   8 39.9062 16.6312   9
  -1  11  -8-21.9458 75.5165   5
  -1  12   8 555.472 54.5191   9
  -1  12   7 125.149 24.6796   9
  -1  12   6 645.906 61.6442   9
  -1  12   6 343.961 140.567   2
   1  12  -5 604.247 96.0278   7
  -1  12   5 578.994 54.9317   9
  -1  12   4 44.0328 32.6603  12
   1  12  -4 50.5532 43.9237   7
   1  12  -4 35.0382 68.6590   5
  -1  12   4 27.8518 66.5816   2
   1  12  -3 1016.46 102.915  12
  -1  12   3 968.269 99.2248  12
  -1  12   3 1114.77 109.534   5
   1  12  -3 1040.61 131.709   5
   1  12  -3 1284.58 128.233   7
   1  12  -2 270.243 59.7405   5
  -1  12   2 247.820 43.6951   5
  -1  12   2 192.366 42.0597  12
   1  12  -2 194.841 44.8373  12
   1  12  -2 373.736 58.1411   7
  -1  12   1 441.231 59.7146  12
   1  12  -1 470.048 61.8119  12
  -1  12   1 491.874 63.2964   5
   1  12  -1 552.460 71.0910   5
   1  12   0 812.646 87.9428  12
  -1  12   0 709.682 84.5078  12
   1  12   0 856.608 93.2575   5
  -1  12   0 791.199 90.4400   5
   1  12   0 1055.07 95.1047   7
  -1  12   0 1049.68 94.0979   7
  -1  12  -1 555.075 66.6135  12
   1  12   1 489.174 65.2949  12
   1  12   1 501.801 67.0232   5
  -1  12  -1 615.326 74.0729   5
  -1  12  -2 279.299 56.7744   5
   1  12   2 211.005 44.7810   5
   1  12   2 217.533 40.8611  12
  -1  12  -2 237.923 43.8910  12
  -1  12  -2 229.391 50.5069   7
   1  12   3 890.518 96.4752  12
  -1  12  -3 1011.67 100.208  12
   1  12   3 916.019 104.670   5
  -1  12  -3 1027.79 129.244   5
  -1  12  -3 1225.57 125.835   7
  -1  12  -4-6.95464 64.7422   5
   1  12   4 8.27957 32.6869  12
  -1  12  -4 5.56651 33.6272   7
   1  12   5 549.554 50.8776   9
  -1  12  -5 438.972 88.6014   7
   1  12   6 541.442 50.8494   9
  -1  12  -6 76.2127 105.103   5
  -1  12  -7 17.7264 89.8767   5
   1  12   7 197.621 28.3079   9
  -1  12  -8 79.8398 78.2386   5
   1  12   8 378.768 38.3055   9
  -1  12  -9 62.8499 46.7007   5
  -1  13   8 18.6341 14.9716   9
   1  13  -8 10.2526 54.0223   5
  -1  13   7 93.7587 21.1256   9
   1  13  -7 118.841 79.6413   5
  -1  13   6 17.4006 88.4849   2
  -1  13   6 29.2532 17.7206   9
   1  13  -6-16.9762 93.0453   5
  -1  13   5 875.502 206.623   2
   1  13  -5 1261.19 173.835   5
   1  13  -5 1429.86 165.228   7
  -1  13   5 1338.56 112.806   9
  -1  13   4 1768.51 156.420  12
   1  13  -4 1823.36 195.375   5
   1  13  -4 1785.11 187.507   7
   1  13  -3 620.764 77.8835  12
  -1  13   3 618.224 74.7270  12
  -1  13   3 741.964 82.7264   5
   1  13  -3 570.664 94.1476   5
   1  13  -3 668.165 95.9581   7
  -1  13   2 513.546 66.7433  12
   1  13  -2 552.385 71.7364  12
  -1  13   2 556.789 68.4387   5
   1  13  -2 519.551 76.9536   5
   1  13  -2 659.110 85.8693   7
  -1  13   1 775.196 88.2451  12
   1  13  -1 849.813 91.7073  12
  -1  13   1 882.886 91.8780   5
   1  13  -1 837.458 94.7722   5
   1  13  -1 913.090 100.903   7
   1  13   0 25.1242 27.9641   5
  -1  13   0-16.1881 27.6344   5
   1  13   0 7.28471 34.6592  12
  -1  13   0-11.3058 32.1540  12
   1  13   0-8.65002 25.8831   7
  -1  13  -1 865.619 93.7563  12
   1  13   1 788.293 93.4634  12
   1  13   1 1012.87 97.9492   5
  -1  13  -1 869.288 98.6948   5
  -1  13  -1 1040.37 106.281   7
   1  13   2 602.247 74.6222  12
  -1  13  -2 578.103 75.3765  12
   1  13   2 661.541 78.4239   5
  -1  13  -2 593.752 82.8295   5
  -1  13  -3 440.486 78.5578   5
   1  13   3 424.420 59.7253  12
  -1  13  -3 351.941 60.0345  12
  -1  13  -3 400.948 75.5626   7
   1  13   3 455.310 66.1339   5
  -1  13  -4 1867.58 198.407   5
   1  13   4 1978.25 147.296   9
  -1  13  -4 1866.85 192.824   7
   1  13   4 1387.10 156.511  12
   1  13   5 1540.59 126.975   9
  -1  13  -5 1402.71 172.717   7
  -1  13  -5 1456.31 189.568   5
   1  13   6 50.6296 17.3702   9
  -1  13  -6 103.183 87.5179   5
   1  13   7 54.7882 16.9723   9
  -1  13  -7 75.5463 78.0487   5
  -1  13  -8-5.19918 51.2865   5
  -1  13  -9 156.833 41.0721   5
   1  14  -8 558.532 80.1101   5
   1  14  -7 835.330 122.789   5
  -1  14   7 936.939 81.2527   9
  -1  14   6 828.205 75.1412   9
   1  14  -6 808.584 127.599   5
   1  14  -5-6.71963 47.5978   7
   1  14  -5-53.2555 65.6659   5
  -1  14   5 11.8910 15.1727   9
   1  14  -4 101.653 56.4364   5
   1  14  -4 89.9636 44.7667  12
  -1  14   4 38.6725 37.7882  12
   1  14  -4 108.447 51.3019   7
  -1  14   3 247.037 50.0200   5
   1  14  -3 202.251 55.6426   5
   1  14  -3 188.532 51.9472  12
  -1  14   3 178.896 48.1982  12
   1  14  -3 137.696 51.1020   7
  -1  14   2 1022.79 106.497  12
   1  14  -2 1033.15 110.534  12
  -1  14   2 1030.12 106.877   5
   1  14  -2 960.411 112.506   5
   1  14  -2 1207.20 128.828   7
   1  14  -1 3167.31 264.238  12
  -1  14   1 2888.99 258.805  12
  -1  14   1 3031.70 260.147   5
   1  14  -1 2924.78 263.118   5
   1  14  -1 3487.97 276.948   7
   1  14   0 1815.43 169.031  12
  -1  14   0 1747.95 165.100  12
  -1  14   0 1880.65 166.734   5
   1  14   0 1814.61 166.804   5
  -1  14  -1 3326.42 279.373  12
   1  14   1 3445.63 280.335  12
  -1  14  -1 3080.73 278.903   5
   1  14   1 3077.34 277.011   5
  -1  14  -1 3679.62 292.554   7
   1  14   2 916.279 102.771  12
  -1  14  -2 957.931 103.332  12
   1  14   2 993.806 104.606   5
  -1  14  -2 901.708 106.443   5
  -1  14  -2 1150.17 124.011   7
  -1  14  -3 239.189 56.6105   5
   1  14   3 173.080 49.1341   5
  -1  14  -3 204.303 52.9260  12
   1  14   3 198.197 48.1316  12
  -1  14  -3 259.274 63.3959   7
  -1  14  -4 131.281 51.6774  12
   1  14   4 101.562 40.7515  12
  -1  14  -4 87.3412 49.4931   7
   1  14   4 124.960 20.7516   9
  -1  14  -4 140.263 60.2003   5
  -1  14  -5-52.4656 47.8394   7
   1  14   5 8.59386 13.2459   9
  -1  14  -5 6.67660 62.6955   5
   1  14   6 798.930 71.1423   9
  -1  14  -6 720.778 121.536   5
  -1  14  -7 870.548 122.640   5
  -1  14  -8 609.016 83.0772   5
   1  15  -7 163.169 53.4825   5
   1  15  -6 382.515 80.4907   5
  -1  15   5 1973.45 160.506   9
   1  15  -5 1892.47 200.116   5
   1  15  -4 3310.73 287.471  12
  -1  15   4 2965.53 283.189  12
   1  15  -4 2866.40 298.616   5
   1  15  -4 3512.17 321.349   7
  -1  15   4 3681.61 268.294   9
  -1  15   3 921.302 100.620  12
   1  15  -3 950.295 104.036  12
  -1  15   3 998.102 104.991   5
   1  15  -3 794.295 105.159   5
   1  15  -3 790.847 119.514   7
   1  15  -2 159.149 45.8664   5
  -1  15   2 191.995 41.5941   5
   1  15  -2 167.613 54.9897  12
  -1  15   2 102.209 45.4130  12
   1  15  -2 148.695 53.8167   7
   1  15  -1 354.700 70.1942  12
   1  15  -1 415.458 59.9690   5
  -1  15   1 393.753 57.1939   5
   1  15   0 186.046 39.2895   5
  -1  15   0 180.943 38.9445   5
  -1  15   0 127.428 47.6422  12
   1  15   0 195.603 56.3007  12
  -1  15  -1 431.184 73.0366  12
   1  15   1 510.806 64.7343   5
  -1  15  -1 462.930 65.7542   5
   1  15   2 101.853 36.6810   5
  -1  15  -2 78.1350 37.0880   5
   1  15   2 85.4850 45.1312  12
  -1  15  -2 65.8659 45.0736  12
  -1  15  -2 90.7297 45.7084   7
   1  15   3 871.713 103.934  12
  -1  15  -3 1088.91 110.524  12
   1  15   3 1017.80 111.052   5
  -1  15  -3 950.465 128.955   7
  -1  15  -3 941.864 111.960   5
  -1  15  -4 3537.99 279.961  12
   1  15   4 3029.47 271.859  12
  -1  15  -4 3090.65 303.328   7
  -1  15  -4 3196.38 291.889   5
  -1  15  -5 1464.99 164.012   5
  -1  15  -6 328.001 73.3878   5
  -1  15  -7 123.822 50.4854   5
  -1  15  -8 42.1719 27.7141   5
   1  16  -7 373.078 58.4745   5
   1  16  -6 328.817 62.3274   5
   1  16  -5 78.0050 47.2605   5
   1  16  -4 161.368 51.4885   5
   1  16  -4 186.560 54.0872  12
  -1  16   4 142.598 50.9982  12
   1  16  -3 172.397 48.4666   5
  -1  16   3 208.873 46.6766   5
  -1  16   3 138.552 52.9325  12
   1  16  -3 170.652 56.0910  12
   1  16  -3 59.4184 58.4302   7
  -1  16   2 2088.09 181.258  12
   1  16  -2 2046.90 184.298  12
  -1  16   2 1978.97 176.845   5
   1  16  -2 1617.17 173.362   5
   1  16  -1 1873.90 169.174  12
  -1  16   1 1670.40 152.721   5
   1  16  -1 1457.18 151.404   5
  -1  16   0 3322.26 267.693  12
   1  16   0 3176.44 268.363  12
  -1  16   0 2936.35 255.717   5
   1  16   0 2745.77 254.744   5
  -1  16  -1 1653.48 159.143  12
  -1  16  -1 1462.43 146.045   5
   1  16   1 1600.69 148.987   5
   1  16   2 2081.51 185.533  12
  -1  16  -2 2102.17 187.821  12
   1  16   2 2021.18 181.831   5
  -1  16  -2 1729.88 177.847   5
   1  16   3 205.066 49.2042   5
  -1  16  -3 145.133 45.2768   5
  -1  16  -3 66.9692 53.2979  12
   1  16   3 144.788 50.5058  12
  -1  16  -3 40.8355 57.8627   7
  -1  16  -4 131.806 49.0333   5
   1  16   4 121.008 50.4060  12
  -1  16  -4 162.405 53.7257  12
  -1  16  -5 73.8598 44.5298   5
  -1  16  -6 363.022 67.7823   5
  -1  16  -7 443.041 64.9343   5
   1  17  -7 99.2452 29.9554   5
   1  17  -6 612.509 76.3782   5
   1  17  -5 1184.18 124.760   5
   1  17  -4 976.070 108.174  12
   1  17  -4 795.763 97.6022   5
   1  17  -3 878.962 102.001  12
  -1  17   3 740.467 96.2169  12
   1  17  -3 699.469 87.9796   5
  -1  17   3 777.735 90.6227   5
   1  17  -2 141.700 41.5342   5
  -1  17   2 272.314 46.6163   5
   1  17  -2 211.714 65.8417  12
  -1  17   2 242.554 65.8926  12
   1  17  -1 455.790 77.7802  12
  -1  17   1 401.909 57.8786   5
   1  17  -1 345.892 57.0568   5
   1  17   0 2.73708 26.3999   5
  -1  17   0 34.8080 28.0527   5
   1  17   0 56.1202 57.4519  12
  -1  17   0 3.60602 49.7326  12
  -1  17  -1 504.946 83.6797  12
  -1  17  -1 392.608 59.8030   5
   1  17   1 482.965 64.6600   5
  -1  17  -2 211.107 45.2703   5
   1  17   2 263.384 47.7166   5
  -1  17  -2 167.048 62.0958  12
   1  17   2 270.690 66.2759  12
   1  17   3 743.059 98.2928  12
  -1  17  -3 823.155 106.507  12
   1  17   3 825.716 94.2088   5
  -1  17  -3 793.768 91.7746   5
  -1  17  -4 875.977 100.594   5
  -1  17  -5 1255.73 129.373   5
  -1  17  -6 532.735 69.8074   5
  -1  17  -7 70.5072 26.9900   5
   1  18  -6 54.8998 26.1466   5
   1  18  -5 90.5987 33.4206   5
   1  18  -4 84.7572 34.0270   5
   1  18  -3 137.362 38.7462   5
   1  18  -3 141.692 55.9740  12
  -1  18   3 121.180 51.6801  12
   1  18  -2 29.9417 30.6601   5
  -1  18   2 60.1293 30.0369   5
  -1  18   2 58.1900 55.0157  12
   1  18  -2 113.743 61.8028  12
  -1  18   1 429.617 56.8094   5
   1  18  -1 320.598 53.7219   5
  -1  18   0 1960.82 184.025  12
   1  18   0 2204.16 185.149  12
  -1  18   0 1667.25 156.797   5
   1  18   0 1510.01 155.541   5
   1  18   1 305.462 51.9058   5
  -1  18  -1 424.857 88.2161  12
  -1  18  -1 406.237 54.5289   5
  -1  18  -2 83.4042 33.5722   5
   1  18   2 70.2866 34.0030   5
   1  18   2 62.1753 54.7857  12
  -1  18  -2 24.9247 55.4261  12
  -1  18  -3 188.410 40.5317   5
  -1  18  -3 125.271 56.4853  12
   1  18   3 52.2631 51.7299  12
  -1  18  -4 64.8719 33.3582   5
  -1  18  -5 75.3065 32.3670   5
  -1  18  -6 83.8432 27.8930   5
   1  19  -5 28.8041 24.0125   5
   1  19  -4 67.1969 29.2820   5
   1  19  -3 78.1326 30.2324   5
   1  19  -3 122.027 55.2868  12
   1  19  -2 191.616 37.1750   5
  -1  19   2 163.859 39.5391   5
   1  19  -2 150.685 61.8179  12
  -1  19   2 92.1477 53.6811  12
   1  19  -1 533.534 88.5216  12
  -1  19   1 484.461 61.0481   5
   1  19  -1 422.504 58.6015   5
  -1  19   0 39.2897 25.6252   5
   1  19   0 35.2495 26.8446   5
  -1  19   0 11.4411 56.2936  12
   1  19   0 34.7722 62.7141  12
  -1  19  -1 560.717 88.6738  12
  -1  19  -1 403.139 57.5378   5
   1  19   1 487.016 61.0057   5
  -1  19  -2 2.34434 30.1135   5
   1  19   2 129.718 36.9743   5
  -1  19  -2 105.038 56.7771  12
   1  19   2 149.816 56.5463  12
  -1  19  -3 101.312 31.1944   5
   1  19   3 81.7150 50.8731  12
  -1  19  -4 78.3927 30.0814   5
  -1  19  -5 32.7570 23.6510   5
   1  20  -5 12.0493 17.3375   5
   1  20  -4 72.9489 24.3951   5
   1  20  -3 258.344 39.9109   5
   1  20  -2 387.999 74.6290  12
  -1  20   2 402.699 52.9538   5
   1  20  -2 345.249 48.3009   5
   1  20  -1 196.720 35.4623   5
  -1  20   1 140.848 34.1231   5
   1  20  -1 175.394 70.2408  12
  -1  20   0 20.3987 21.6411   5
   1  20   0-2.06762 21.9353   5
  -1  20   0-49.8608 56.4097  12
   1  20   0 25.4239 56.4705  12
  -1  20  -1 126.487 30.0320   5
   1  20   1 147.516 33.8758   5
  -1  20  -1 130.667 65.2511  12
   1  20   2 365.780 70.8688  12
   1  20   2 362.354 52.4281   5
  -1  20  -2 355.020 47.5055   5
  -1  20  -3 265.308 40.0263   5
  -1  20  -4 112.131 28.1453   5
  -1  20  -5 10.7504 16.0851   5
   1  21  -3 326.347 40.2496   5
   1  21  -2 211.339 33.0960   5
  -1  21   1 94.4996 28.4303   5
   1  21  -1 114.644 26.5239   5
  -1  21   0 29.6183 21.7321   5
   1  21   0 1.76043 21.0823   5
   1  21   0 31.2960 51.6428  12
   1  21   1 61.4466 26.4411   5
  -1  21  -1 112.160 26.2107   5
  -1  21  -2 227.988 33.9087   5
  -1  21  -3 433.150 48.4556   5
   1  22  -1 638.848 62.8427   5
   1  22   0 881.372 81.5469   5
  -1  22   0 876.805 81.6943   5
  -1  22  -1 645.897 63.1439   5
   2   0   0 37641.4 2860.34   6
   2   0  -1 9796.13 749.708   7
   2   0  -2 7065.84 545.384   7
   2   0  -3 2235.35 182.648   7
   2   0  -4 439.405 50.6143   7
  -2   0  -5 3299.65 270.714   7
   2   0  -5 3232.66 269.616   7
   2   0   6 788.615 72.5408   4
   2   0  -6 821.433 84.6163   7
  -2   0  -6 802.335 86.3087   7
  -2   0   7 1335.79 119.714   9
   2   0   7 1412.07 120.512  10
  -2   0   7 1552.20 121.049   8
  -2   0   7 1499.39 158.164   1
  -2   0   8 2686.05 214.296  10
   2   0   8 2621.06 214.358  10
  -2   0   8 2596.32 212.732   8
  -2   0   8 2658.56 255.578   1
   2   0   9 2856.31 234.728  10
  -2   0   9 2916.23 234.056  10
  -2   0   9 2850.60 275.819   1
   2   0  10 399.490 46.9981  10
  -2   0  10 474.622 47.7064  10
  -2   0  11 8.55638 11.3630  10
  -2   1  11 680.697 63.4951  10
   2  -1  10 584.095 59.4288  10
  -2   1  10 612.422 60.0708  10
  -2   1   9 239.702 33.7181  10
   2  -1   9 271.169 34.9494  10
  -2   1   9 199.236 59.0507   1
  -2   1   8 352.469 42.9776   9
  -2   1   8 427.803 44.9948  10
   2  -1   8 443.140 45.6247  10
  -2   1   8 402.719 44.1400   8
  -2   1   8 468.189 77.5125   1
   2  -1   7 95.4168 18.5004  10
  -2   1   7 98.1278 19.7848   8
  -2   1   7 95.9102 20.2660   9
  -2   1   7 113.650 38.4053   1
  -2   1   6 4029.00 312.938   1
   2   1  -6 3560.80 293.151   7
   2  -1   6 3307.88 274.820   4
   2   1  -5 6514.46 488.998   7
  -2  -1  -5 5808.08 481.195   7
   2   1  -4 5808.19 460.663   7
   2   1  -3 8328.54 646.880   7
   2   1  -2 4004.67 314.572   7
  -2   1   1 4203.90 325.017   1
   2   1  -1 4187.89 325.647   7
   2  -1   0 17.6615 4.78958   6
  -2   1   0 45.4251 24.7382   2
   2  -1  -2 5006.94 387.928   7
   2  -1  -3 8714.67 672.824   7
   2  -1  -4 5950.79 466.887   7
  -2   1  -5 6112.26 475.057   7
   2  -1  -5 5757.77 465.450   7
  -2   1  -6 3641.83 310.678   7
   2   1   6 3651.86 289.048   8
   2   1   6 3762.86 290.113   9
   2   1   6 3648.81 289.134  10
  -2  -1   7 113.896 44.2997   1
  -2  -1   7 92.2299 19.6140   9
   2   1   7 70.4014 18.2650   9
  -2  -1   7 90.2440 18.2377   8
   2   1   7 76.3768 16.8869  10
  -2  -1   8 247.828 62.1643   1
  -2  -1   8 249.440 31.8730   8
   2   1   8 292.169 34.3185  10
  -2  -1   8 279.570 33.7328  10
  -2  -1   9 311.502 69.1774   1
  -2  -1   9 298.422 37.2750  10
   2   1   9 311.441 38.8730  10
   2   1  10 552.424 59.5792  10
  -2  -1  10 630.341 59.2666  10
  -2   2  11 76.4592 17.5826  10
  -2   2  10 763.834 72.7896  10
  -2   2   9 1457.74 177.344   1
  -2   2   9 1825.97 146.494  10
   2  -2   9 1681.06 144.758  10
  -2   2   8 678.712 99.8596   1
   2  -2   8 723.554 70.1490  10
  -2   2   8 878.325 72.9368  10
  -2   2   8 682.902 68.4084   9
  -2   2   8 729.961 69.5248   8
   2   2  -7 258.445 54.6777   7
  -2   2   7 358.265 65.0173   1
  -2   2   7 313.104 36.2466   9
   2  -2   7 321.069 35.4484  10
  -2   2   7 336.182 36.8215   8
   2   2  -6 74.2636 31.6550   7
   2  -2   6 90.6561 19.7817   4
  -2   2   6 91.2202 34.5932   1
  -2   2   6 102.917 18.7023   8
  -2   2   6 89.6360 18.0094   9
   2   2  -5 276.568 46.5010   7
  -2   2   5 262.870 48.4897   1
  -2  -2  -5 223.835 32.2174   7
  -2   2   4 14.2369 26.7407   1
   2   2  -4 6.30129 23.4554   7
  -2  -2  -4 2.27123 14.3534   7
  -2   2   3 487.732 54.5943   1
   2   2  -3 384.700 47.9970   7
  -2   2   2 623.999 58.5274   1
   2   2  -2 555.492 56.5273   7
  -2   2   1 12939.3 1010.68   1
   2   2  -1 13563.3 1012.27   7
  -2   2   0 21796.6 1692.65   2
   2  -2  -1 10949.8 836.789   6
   2   2   1 11083.0 838.384   6
   2  -2  -3 367.092 37.9489   7
   2  -2  -4 25.8199 17.3553   7
  -2   2  -5 297.103 47.8073   7
   2  -2  -5 255.026 34.0815   7
   2   2   6 21.6860 16.3447   4
  -2   2  -6 39.4404 29.7195   7
   2   2   6 21.9451 12.1920   8
   2   2   6 22.4799 14.6894   9
   2   2   6 30.0684 11.3215  10
  -2   2  -7 152.347 47.4050   7
   2   2   7 239.070 29.9511   8
  -2  -2   7 256.592 29.7490   8
   2   2   7 234.223 29.9864  10
   2   2   7 227.445 30.5576   9
  -2  -2   8 801.251 122.850   1
   2   2   8 875.895 85.8751  10
  -2  -2   8 1051.86 86.3601  10
  -2  -2   9 1587.91 184.144   1
   2   2   9 1774.38 143.316  10
  -2  -2   9 1583.40 139.294  10
   2   2  10 521.939 59.3545  10
  -2  -2  10 664.341 58.9757  10
  -2   3  10 159.710 26.8739  10
  -2   3   9 347.657 43.5044  10
   2  -3   9 384.122 42.6899  10
  -2   3   8 597.721 89.8106   1
   2  -3   8 613.005 56.1185  10
  -2   3   8 531.572 54.1634   9
  -2   3   8 475.291 54.4814  10
  -2   3   8 539.509 54.7139   8
   2   3  -7 49.8053 33.6531   7
   2  -3   7 32.2007 13.6914  10
  -2   3   7 36.5243 16.4308   9
  -2   3   7 60.8347 16.3233   8
  -2   3   7 51.2354 35.3227   1
  -2   3   6 442.961 70.1970   1
  -2   3   6 509.398 47.0046   8
  -2   3   6 429.122 45.3809   9
   2   3  -6 525.818 69.3090   7
   2  -3   6 459.505 48.3458   4
  -2   3   5 1043.90 109.372   1
   2   3  -5 943.497 103.918   7
  -2   3   4 5125.14 362.778   1
  -2  -3  -4 4034.21 337.497   7
   2   3  -4 4755.05 355.737   7
  -2   3   3 1484.14 124.396   1
   2   3  -3 1249.04 120.069   7
  -2   3   2 164.384 25.1148   1
   2   3  -2 157.262 26.1366   7
  -2   3   1 1357.83 116.045   2
  -2   3   0 978.216 111.957   2
   2   3   0 425.644 41.9101   7
   2  -3  -1 1485.74 106.452   6
   2   3   1 1195.95 107.665   6
   2   3   5 807.075 74.2158   4
  -2   3  -5 1078.22 102.103   7
   2   3   6 416.901 44.8822   4
  -2   3  -6 570.613 71.9667   7
  -2   3  -7 24.1579 31.6491   7
   2   3   7 41.1492 15.1705  10
   2   3   7 33.4032 17.2740   9
  -2  -3   7 39.7142 13.5632   8
   2   3   7 35.6939 14.1732   8
  -2  -3   8 568.635 53.0474  10
   2   3   8 470.778 53.3048  10
  -2  -3   8 491.169 94.5680   1
  -2  -3   9 464.141 46.9657  10
   2   3   9 402.807 48.6868  10
  -2  -3  10 98.9680 19.6077  10
   2   3  10 100.889 23.0951  10
  -2   3 -11 71.6762 33.6418   5
  -2   4   9 85.7498 21.4724   9
   2  -4   9 82.7480 19.7651  10
  -2   4   8 231.282 60.6430   1
  -2   4   8 225.172 32.6390   8
  -2   4   8 270.771 34.3730   9
   2  -4   8 293.286 34.0169  10
  -2   4   7 703.098 96.5106   1
  -2   4   7 591.312 63.4349  10
   2  -4   7 757.578 64.5734  10
   2   4  -7 738.237 97.6322   7
  -2   4   7 653.641 64.1026   8
  -2   4   7 715.152 64.8784   9
   2   4  -6 87.8138 37.3286   7
  -2   4   6 81.5534 17.9226   9
  -2   4   6 72.0598 33.8791   1
  -2   4   5 1222.42 118.189   1
   2   4  -5 992.438 110.380   7
   2  -4   5 1030.57 91.2558   4
  -2   4   4 971.685 99.5633   1
   2   4  -4 882.218 94.9368   7
  -2   4   3 1467.88 95.1786   1
   2   4  -3 1343.41 93.0796   7
   2   4  -2 1581.92 135.808   7
  -2   4   1 2467.41 207.509   2
   2   4   0 205.596 26.0103   7
   2   4   1 2411.56 186.790   6
   2  -4  -2 1634.30 125.571   6
  -2   4  -5 1262.33 118.623   7
   2   4   5 1021.03 90.1252   4
   2   4   6 101.457 17.7988   8
  -2   4  -6 126.703 43.2189   7
   2   4   6 114.582 18.1445  10
  -2   4  -7 904.064 115.060   7
  -2  -4   8 254.935 30.3719  10
   2   4   8 203.914 30.9475   9
  -2  -4   9 116.303 20.0272  10
   2   4   9 73.2764 23.5347  10
  -2  -4  10 220.127 27.8065  10
  -2   4 -11 33.4969 32.3439   5
  -2   5   9 44.3789 18.9036   9
   2  -5   9 25.1355 14.6749  10
  -2   5   9 50.2067 19.4504  10
   2  -5   8 388.162 42.9005  10
  -2   5   8 376.494 43.3823   9
  -2   5   8 379.086 43.3570  10
   2   5  -8 342.670 79.4766   7
   2   5  -7 223.258 62.0523   7
  -2   5   7 282.344 59.5916   1
  -2   5   7 303.713 35.9857   9
  -2   5   7 284.062 34.9486  10
   2  -5   7 301.561 33.9626  10
  -2   5   6 663.542 90.1101   1
  -2   5   6 738.077 64.5631   8
  -2   5   6 648.863 63.0670   9
   2   5  -6 763.077 94.1790   7
   2  -5   5 404.353 42.3434   4
   2   5  -5 327.324 57.4884   7
  -2   5   5 364.652 59.7009   1
  -2   5   4 884.464 96.1479   1
   2   5  -4 870.071 94.8012   7
   2   5  -3 314.233 46.7450   7
  -2   5   2 3251.87 269.131   2
  -2   5   1 915.829 102.739   2
   2   5  -1 1008.50 88.3210   7
   2   5   0 4627.74 361.620   7
   2   5   1 795.944 64.9367   6
  -2   5  -4 823.103 91.8270   7
  -2   5  -5 394.165 60.4519   7
   2   5   5 323.736 35.6238   4
   2   5   6 620.048 58.7667  10
   2   5   6 639.594 58.1383   8
  -2   5  -6 652.257 88.9090   7
   2   5   6 631.021 58.9440   9
   2   5   7 222.938 31.9519  10
  -2  -5   7 278.022 30.4141  10
   2   5   7 260.856 31.7782   8
  -2   5  -7 260.551 65.1961   7
  -2   5  -8 251.912 68.6143   7
  -2  -5   8 307.434 34.4276  10
   2   5   8 285.624 37.4446  10
  -2  -5   9 19.9316 12.6933  10
  -2  -5  10 19.9211 11.2191  10
  -2   5 -10 37.4773 31.7024   5
  -2   5 -11 232.140 50.0838   5
  -2   6  10 554.802 56.3540  10
  -2   6   9 688.971 66.2025  10
  -2   6   9 626.211 63.4061   9
   2   6  -8 519.722 106.744   7
  -2   6   8 693.194 111.851   2
  -2   6   8 548.290 56.8892   8
  -2   6   8 542.938 57.7880  10
  -2   6   8 592.824 58.1779   9
   2   6  -7 54.1595 48.4468   7
  -2   6   7 84.4212 21.3344   9
  -2   6   7 81.4516 19.0222   8
  -2   6   7 72.3194 18.5914  10
   2   6  -6 287.174 60.8465   7
  -2   6   6 267.579 32.5817   8
   2   6  -5 691.814 87.2562   7
   2   6  -4 362.492 58.3173   7
  -2   6   3 415.798 55.4238   2
   2   6  -3 234.716 45.6666   7
  -2   6   2 474.872 62.3996   2
  -2   6   1 3131.66 293.322   2
  -2   6   1 3224.45 255.601   7
   2   6  -1 3458.00 265.254   7
   2   6   0 8102.81 627.469   7
   2   6   1 3185.48 269.835   7
   2   6   1 3586.29 266.247   6
  -2   6  -4 358.453 56.1941   7
  -2   6  -5 656.121 81.0972   7
   2   6   5 530.143 51.4255   4
   2   6   6 193.614 25.5126  10
   2   6   6 172.175 23.6690   8
   2   6   6 172.952 25.3431   9
  -2   6  -6 167.330 52.9380   7
   2   6   7 161.588 25.7857  10
   2   6   7 126.360 23.5029   9
   2   6   7 149.704 23.1479   8
  -2   6  -7 117.093 50.4307   7
  -2   6  -8 619.044 107.876   7
   2   6   8 584.342 63.4173  10
  -2  -6   8 670.895 60.1915  10
   2   6   9 707.737 71.4014  10
  -2   6 -10 513.651 71.5238   5
  -2   7  10 374.698 42.3650  10
  -2   7   9 1018.07 88.3810   9
  -2   7   9 933.179 88.9444  10
   2   7  -8 333.190 90.2624   7
  -2   7   8 416.065 92.3908   2
  -2   7   8 467.022 48.8957  10
  -2   7   8 435.750 47.8206   9
  -2   7   8 398.451 45.8621   8
   2   7  -7 83.0205 46.5174   7
  -2   7   7 99.9383 53.3014   2
  -2   7   7 94.5512 20.8591   8
  -2   7   7 104.345 20.3937  10
  -2   7   6 1562.80 169.524   2
   2   7  -6 1307.53 150.000   7
  -2   7   6 1398.29 116.301   8
  -2   7   6 1340.25 116.007  10
  -2   7   5 5422.76 442.638   2
   2   7  -5 4790.87 424.446   7
  -2   7   4 4777.81 388.857   2
   2   7  -4 4297.67 375.113   7
  -2   7   3 855.361 100.444   2
  -2   7   2 726.911 92.9981   2
   2   7  -2 738.192 78.3277   7
  -2   7   1 1384.31 166.711   2
   2   7  -1 1571.69 131.094   7
  -2   7   1 1446.82 120.614   7
   2   7   0 948.584 86.6800   7
   2   7   1 1326.09 123.707   7
   2   7   1 1572.86 118.549   6
  -2   7  -4 4577.11 383.096   7
  -2   7  -5 4804.62 409.350   7
   2   7   6 1171.19 101.914  10
   2   7   6 1193.68 99.9873   8
  -2   7  -6 1269.73 140.872   7
   2   7   6 1150.39 100.478   9
   2   7   7 58.2195 19.2055  10
   2   7   7 73.9434 19.2233   9
  -2   7  -7 38.7533 41.6618   7
  -2   7  -8 364.240 89.8893   7
   2   7   8 360.757 42.0795   9
   2   7   8 401.976 46.4719  10
   2   7   9 864.926 84.1389  10
  -2   7  -9 990.233 107.012   5
  -2   7 -10 357.192 64.8796   5
  -2   8   9 1986.93 165.826  10
  -2   8   8 985.573 158.249   2
   2   8  -8 1072.94 158.500   7
  -2   8   8 1229.01 107.506   8
  -2   8   8 1321.37 110.273  10
  -2   8   7 1798.77 209.178   2
   2   8  -7 1768.37 193.554   7
  -2   8   7 1730.60 145.080   8
  -2   8   7 1730.34 146.242  10
  -2   8   6 801.467 115.123   2
   2   8  -6 576.700 93.2880   7
  -2   8   6 661.081 60.8374   8
  -2   8   6 635.268 61.5805   9
  -2   8   6 617.103 60.2264  10
  -2   8   5 568.436 94.8295   2
  -2   8   5 646.220 58.7818   8
   2   8  -5 566.812 85.8176   7
  -2   8   4 1608.40 171.247   2
   2   8  -4 1565.58 157.211   7
  -2   8   3 498.929 78.5213   2
  -2   8   2 2884.27 310.934   2
   2   8  -2 3794.85 291.247   7
  -2   8   1 16771.3 1531.31   2
   2   8  -1 20363.8 1490.02   7
  -2   8   1 19262.2 1477.94   7
  -2   8   0 11806.6 908.492   7
   2   8   0 11703.6 909.308   7
  -2   8  -1 19695.0 1537.60   7
   2   8   1 18747.5 1529.50   7
   2   8   1 20462.8 1521.42   6
  -2   8  -2 3220.87 271.235   7
  -2   8  -4 1487.28 150.841   7
   2   8   5 456.261 44.1009   9
   2   8   5 378.301 41.9070   8
   2   8   5 443.098 44.9422  10
  -2   8  -6 666.930 85.7704   5
   2   8   6 579.126 56.7062   9
  -2   8  -6 548.886 91.2270   7
   2   8   6 645.187 56.2351   8
   2   8   6 533.461 57.1341  10
  -2   8  -7 1808.95 188.677   5
  -2   8  -7 1731.45 202.416   7
   2   8   7 1920.88 160.709  10
   2   8   7 1949.48 157.911   9
  -2   8  -8 1141.96 138.700   5
  -2   8  -8 1476.28 173.561   7
   2   8   8 1315.96 111.335   9
   2   8   8 1268.04 114.631  10
  -2   8  -9 1853.00 186.810   5
  -2   8 -10 50.4279 45.2841   5
  -2   9   9 830.972 77.7646  10
  -2   9   8 269.631 35.3198  10
   2   9  -7 124.371 65.5669   7
  -2   9   7 241.296 31.4831  10
  -2   9   7 265.542 34.1380   9
  -2   9   7 213.427 30.3776   8
  -2   9   7 227.157 81.7544   2
  -2   9   6 687.621 61.7916  10
   2   9  -6 643.618 100.722   7
  -2   9   6 644.615 61.1122   8
  -2   9   6 610.906 62.2092   9
  -2   9   6 607.813 116.922   2
  -2   9   5 5827.93 454.274  10
  -2   9   5 6092.44 454.996   8
   2   9  -5 5273.64 490.308   7
  -2   9   5 5171.21 513.089   2
  -2   9   4 5764.41 508.602   2
   2   9  -3 2932.93 228.780   7
  -2   9   3 1907.83 239.158   2
   2   9  -2 720.906 76.7862   7
  -2   9   2 332.247 99.1152   2
   2   9  -1 1550.40 137.943   7
  -2   9   1 1473.35 125.827   7
   2   9   0 3996.18 324.089   7
  -2   9   0 4026.58 323.445   7
   2   9   1 1367.07 121.073   7
  -2   9  -1 1458.59 131.032   7
  -2   9  -2 371.047 56.6339   7
  -2   9  -3 2657.98 237.514   7
  -2   9  -4 6352.02 524.208   5
  -2   9  -5 6205.66 478.864   5
   2   9   5 5455.79 440.287   8
   2   9   5 5564.47 441.147   9
  -2   9  -5 5194.98 478.150   7
   2   9   5 6144.85 444.349  10
  -2   9  -6 572.522 99.1011   5
   2   9   6 671.072 63.0338  10
  -2   9  -6 629.631 99.9677   7
   2   9   6 646.095 60.7583   9
   2   9   6 616.832 58.9361   8
  -2   9  -7 203.714 63.6583   7
   2   9   7 209.295 33.1287  10
   2   9   7 275.495 32.9612   9
  -2   9  -7 285.298 73.8047   5
   2   9   8 231.771 33.3422  10
   2   9   8 202.343 30.1855   9
  -2   9  -8 162.251 69.8721   5
  -2   9  -9 610.341 97.8482   5
  -2   9 -10 175.037 56.2139   5
  -2  10   9 482.379 49.0478   9
  -2  10   8 756.348 71.7980  10
  -2  10   8 759.736 72.0208   9
   2  10  -7 532.298 97.0762   7
  -2  10   7 424.372 114.349   2
  -2  10   7 570.956 55.4699  10
  -2  10   7 528.579 52.9897   8
  -2  10   7 530.614 56.1499   9
   2  10  -6 198.533 62.0192   7
  -2  10   6 211.695 85.6692   2
  -2  10   6 173.819 25.4889   8
  -2  10   6 161.093 27.9610   9
  -2  10   6 168.020 25.0328  10
  -2  10   5 485.333 108.321   2
   2  10  -5 594.554 91.0833   7
  -2  10   5 527.441 50.8699   8
  -2  10   4 120.511 67.2735   2
  -2  10   3 734.522 135.863   2
   2  10  -3 1131.69 116.609   7
  -2  10   2 2303.73 290.240   2
   2  10  -2 3268.12 259.485   7
  -2  10   1 2453.07 203.650   7
   2  10  -1 2623.13 218.086   7
  -2  10   0 2597.33 212.524   7
   2  10   0 2559.22 213.686   7
   2  10   0 2472.80 200.523   6
  -2  10  -1 3189.23 269.816   7
  -2  10  -2 2982.53 259.873   7
  -2  10  -3 1131.37 124.182   7
   2  10   4 127.219 19.4118   9
  -2  10  -4 55.3410 59.4222   5
  -2  10  -5 353.092 92.1914   5
   2  10   5 416.838 45.4665  10
   2  10   5 430.445 44.0721   9
  -2  10  -5 411.600 77.7121   7
   2  10   5 466.800 43.1208   8
  -2  10  -6 210.686 89.4473   5
   2  10   6 222.202 32.1523  10
   2  10   6 279.392 32.6459   9
  -2  10  -6 212.554 62.5424   7
  -2  10  -7 573.285 99.6452   7
   2  10   7 522.454 55.7123  10
   2  10   7 528.725 52.9535   9
  -2  10  -7 417.871 103.524   5
   2  10   8 722.276 64.9192   9
  -2  10  -8 434.745 111.919   5
  -2  10  -9 124.736 67.8671   5
  -2  10 -10 168.375 48.9949   5
  -2  11   9 172.973 25.3902   9
  -2  11   8 420.888 46.0720   9
  -2  11   7 74.5936 17.5283   8
  -2  11   7 55.0129 21.3662   9
   2  11  -7 34.9606 47.4100   7
  -2  11   6 193.379 100.402   2
  -2  11   6 269.217 34.4865  10
  -2  11   6 312.319 37.7067   9
  -2  11   6 327.577 34.9296   8
   2  11  -6 260.474 73.8848   7
  -2  11   5 1593.38 129.571   8
  -2  11   5 1292.87 212.081   2
  -2  11   4 1409.43 132.890  12
  -2  11   4 1172.50 198.451   2
   2  11  -3 1341.38 124.847   7
  -2  11   3 1038.48 102.173   5
  -2  11   2 203.794 81.8807   2
   2  11  -2 352.297 56.2249   7
   2  11  -1 709.986 82.7098   7
   2  11   0 12.4549 23.4088   7
  -2  11   0 11.5482 21.3303   7
  -2  11  -1 680.987 79.6861   7
  -2  11  -2 279.167 51.1745   7
  -2  11  -3 916.352 106.003   7
  -2  11  -3 713.233 113.070   5
  -2  11  -4 1847.56 169.270   7
   2  11   4 1843.33 126.265   9
   2  11   5 1590.33 129.061   9
  -2  11  -5 1273.63 185.026   5
  -2  11  -6 502.033 92.5709   7
  -2  11  -6 318.028 111.685   5
   2  11   6 549.496 52.8214   9
  -2  11  -7 27.0201 41.7087   7
  -2  11  -7-50.6682 87.7665   5
   2  11   7 39.1192 18.2257   9
   2  11   7-13.7333 75.7631   2
  -2  11  -8 58.7200 84.2442   5
   2  11   8 438.615 42.6118   9
  -2  12   8 199.963 28.9763   9
  -2  12   7 71.6085 21.1152   9
   2  12  -6 68.2689 54.7138   7
  -2  12   6 127.231 20.3325   8
  -2  12   6 132.280 24.7295   9
  -2  12   6 66.8576 90.3237   2
   2  12  -5 178.482 64.1858   7
  -2  12   5 143.004 111.575   2
  -2  12   4 188.158 43.5677  12
   2  12  -4 267.058 65.7643   7
  -2  12   4 194.520 101.142   2
   2  12  -3 25.0923 34.9382  12
  -2  12   3 59.2571 32.8027  12
   2  12  -3 142.547 44.0026   7
  -2  12   3 63.3327 32.2574   5
  -2  12   3 144.760 74.5464   2
  -2  12   2 85.1574 29.2264   5
   2  12  -2 22.3800 33.4862  12
  -2  12   2 41.7365 28.5666  12
   2  12  -2 66.6489 35.4550   7
   2  12  -1 401.057 56.6718  12
  -2  12   1 338.588 51.1219  12
  -2  12   1 404.510 54.9589   5
   2  12  -1 537.649 66.4860   7
   2  12   0 978.674 104.065  12
  -2  12   0 905.475 100.136  12
  -2  12   0 1144.05 108.210   5
  -2  12   0 1235.25 109.381   7
   2  12   0 1299.04 112.932   7
   2  12   1 364.391 54.3507  12
  -2  12  -1 381.651 52.4069  12
  -2  12  -1 476.117 63.2038   7
  -2  12  -1 422.228 60.6415   5
  -2  12  -2 18.4654 31.0081  12
   2  12   2-4.22133 29.4697  12
  -2  12  -2 45.3565 33.7468   7
  -2  12  -2 19.2002 38.1933   5
  -2  12  -3 116.670 38.6336  12
   2  12   3 43.9423 32.3051  12
  -2  12  -3 87.4489 51.5108   5
  -2  12  -3 111.774 45.2677   7
   2  12   4 222.726 46.9984  12
  -2  12  -4 158.195 76.7991   5
   2  12   4 329.066 33.2590   9
  -2  12  -4 349.269 68.9649   7
   2  12   5 237.562 29.2844   9
  -2  12  -5 172.303 59.3415   7
   2  12   6 94.7167 20.5336   9
  -2  12  -6 9.53822 86.6972   5
   2  12   7 26.7804 14.6343   9
  -2  12  -7 17.6762 84.4351   5
  -2  12  -8-6.60503 63.4214   5
   2  12   8 196.260 25.3904   9
  -2  12  -9 224.521 54.9598   5
  -2  13   8 454.860 46.0252   9
  -2  13   7 271.747 34.4111   9
  -2  13   6 689.200 65.0119   9
  -2  13   6 332.329 146.880   2
   2  13  -5 219.838 67.6222   7
  -2  13   5 280.392 34.3135   9
   2  13  -4 340.260 55.8230  12
  -2  13   4 252.445 49.9470  12
   2  13  -4 306.336 70.4842   7
  -2  13   4 165.273 98.6213   2
  -2  13   3 138.893 38.8756   5
  -2  13   3 123.600 39.3899  12
   2  13  -3 68.9173 39.9111  12
   2  13  -3 140.632 50.2370   7
  -2  13   2 77.7242 30.9115   5
  -2  13   2 56.6686 31.2609  12
   2  13  -2 23.0295 37.4213  12
   2  13  -2 46.1047 35.7355   7
  -2  13   1 570.745 69.2584  12
   2  13  -1 509.947 71.9014  12
  -2  13   1 520.006 67.3507   5
   2  13  -1 672.245 81.0938   7
  -2  13   0 165.706 39.9392   5
  -2  13   0 238.568 45.1611  12
   2  13   0 172.511 45.9142  12
   2  13   0 229.994 44.7292   7
  -2  13  -1 628.200 73.1241  12
   2  13   1 556.359 75.0560  12
  -2  13  -1 546.655 74.8870   5
  -2  13  -1 686.151 80.9593   7
  -2  13  -2 54.7678 37.6827   5
  -2  13  -2 70.3167 36.1633  12
   2  13   2 45.9226 34.1646  12
  -2  13  -2 76.6145 38.3773   7
  -2  13  -3 90.2504 49.6300   5
  -2  13  -3 82.6704 39.3030  12
   2  13   3 49.6572 34.4060  12
  -2  13  -3 68.6153 44.4513   7
   2  13   4 345.285 54.2699  12
  -2  13  -4 326.010 72.8026   7
   2  13   4 327.988 35.9883   9
  -2  13  -4 414.671 83.7528   5
  -2  13  -5 216.527 66.2385   7
  -2  13  -5 236.545 88.7665   5
   2  13   5 237.390 30.1747   9
   2  13   6 620.789 58.1730   9
  -2  13  -6 645.169 129.591   5
  -2  13  -7 262.380 84.0505   5
   2  13   7 194.966 26.9407   9
  -2  13  -8 368.552 79.4987   5
  -2  13  -9 7.88768 28.8205   5
  -2  14   7 66.5808 17.8598   9
  -2  14   6 366.876 41.3897   9
   2  14  -5 339.657 78.1953   7
  -2  14   5 353.488 39.8383   9
  -2  14   4 82.7900 42.7500  12
   2  14  -4 110.809 46.8024  12
   2  14  -4 154.366 60.4322   7
  -2  14   3 306.685 52.1570   5
   2  14  -3 199.805 51.8655  12
  -2  14   3 234.967 50.9285  12
   2  14  -3 231.169 61.6044   7
  -2  14   2 214.648 50.0384  12
   2  14  -2 250.565 54.7925  12
   2  14  -2 247.664 57.4569   7
  -2  14   2 321.341 48.8614   5
   2  14  -1 239.666 63.0140  12
  -2  14   1 305.460 57.7369  12
   2  14  -1 417.369 66.7717   7
  -2  14   1 503.995 57.5590   5
  -2  14   0 203.472 44.4398   5
   2  14   0 305.213 58.5090  12
  -2  14   0 251.838 50.5357  12
   2  14   1 379.921 67.8715  12
  -2  14  -1 388.875 65.3982  12
  -2  14  -1 485.645 62.8007   5
  -2  14  -1 489.782 70.5787   7
  -2  14  -2 160.544 45.1812   5
  -2  14  -2 183.263 47.2550  12
   2  14   2 130.922 47.1408  12
  -2  14  -2 178.029 50.4568   7
  -2  14  -3 234.820 59.5247   5
  -2  14  -3 220.510 55.5268  12
   2  14   3 215.757 50.0208  12
  -2  14  -3 302.635 66.1982   7
   2  14   4 68.9298 41.4013  12
  -2  14  -4 89.4093 50.3668  12
  -2  14  -4 86.6213 49.6522   7
   2  14   4 131.122 20.8549   9
  -2  14  -4 174.851 64.8820   5
  -2  14  -5 226.376 67.1684   7
   2  14   5 332.351 35.3698   9
  -2  14  -5 283.549 82.3560   5
  -2  14  -6 335.784 91.8253   5
  -2  14  -7 135.651 63.9431   5
  -2  14  -8 32.1867 40.4886   5
  -2  15   6 240.383 31.1770   9
  -2  15   5 1147.55 99.3826   9
  -2  15   4 738.834 94.5053  12
   2  15  -4 931.180 99.4776  12
   2  15  -4 908.457 125.479   7
  -2  15   3 222.807 55.3029  12
   2  15  -3 308.279 61.6306  12
   2  15  -3 270.529 73.2804   7
  -2  15   3 420.207 59.2309   5
   2  15  -2 282.784 62.2574  12
  -2  15   2 241.231 56.3208  12
   2  15  -2 289.538 67.6270   7
  -2  15   2 318.284 50.5500   5
  -2  15   1 91.3758 31.9102   5
   2  15  -1 29.4189 47.1483  12
  -2  15   0 737.288 86.7505  12
   2  15   0 704.755 89.3235  12
  -2  15   0 564.361 74.2729   5
  -2  15  -1 84.7382 35.3189   5
  -2  15  -1 118.064 48.6937  12
  -2  15  -2 229.845 47.1976   5
   2  15   2 172.522 52.8003  12
  -2  15  -2 164.017 53.3529  12
  -2  15  -2 119.988 47.1331   7
  -2  15  -3 381.834 63.3415   5
  -2  15  -3 354.904 64.5244  12
   2  15   3 325.804 61.2396  12
  -2  15  -3 203.695 69.7872   7
   2  15   4 976.673 99.5611  12
  -2  15  -4 837.561 104.109  12
  -2  15  -4 681.643 117.935   7
  -2  15  -4 851.633 111.295   5
  -2  15  -5 948.646 123.487   5
  -2  15  -6 344.284 74.0412   5
  -2  15  -7 81.1189 47.5798   5
  -2  15  -8 38.6863 27.9623   5
   2  16  -4 804.222 96.9028  12
   2  16  -3 663.819 87.6569  12
  -2  16   3 599.692 82.8569  12
   2  16  -3 565.033 97.3478   7
  -2  16   3 589.452 77.4731   5
  -2  16   2 156.858 39.8891   5
  -2  16   2 170.551 55.4818  12
   2  16  -2 211.448 63.7128  12
   2  16  -1 1996.49 192.158  12
  -2  16   1 1977.45 178.059   5
   2  16   0 4292.04 337.762  12
  -2  16   0 3854.79 329.237  12
  -2  16   0 3642.08 320.161   5
  -2  16  -1 1803.57 167.621  12
  -2  16  -1 1645.44 157.747   5
  -2  16  -2 85.2188 35.3267   5
   2  16   2 65.2449 46.2568  12
  -2  16  -2 85.1896 54.5364  12
  -2  16  -3 477.910 70.8753   5
  -2  16  -3 476.156 80.7331  12
   2  16   3 519.719 74.6046  12
  -2  16  -3 486.454 89.5322   7
  -2  16  -4 747.603 90.2843   5
   2  16   4 501.431 77.9015  12
  -2  16  -5 763.389 98.0887   5
  -2  16  -6 151.363 50.1368   5
  -2  16  -7 53.4022 33.3069   5
   2  17  -4 1188.35 124.877  12
   2  17  -3 1335.30 135.771  12
  -2  17   3 1226.15 134.469  12
  -2  17   3 1369.50 132.210   5
   2  17  -2 724.429 96.3197  12
  -2  17   2 617.516 93.9939  12
  -2  17   2 743.467 82.8760   5
  -2  17   1 89.7253 33.0413   5
   2  17  -1 37.7564 55.5770  12
  -2  17   0 439.473 77.5764  12
   2  17   0 481.359 80.2930  12
  -2  17   0 384.966 56.2945   5
  -2  17  -1 37.8015 30.0849   5
  -2  17  -1 28.4818 53.6522  12
   2  17   2 771.404 95.5864  12
  -2  17  -2 693.444 97.8686  12
  -2  17  -2 610.468 78.6482   5
  -2  17  -3 1035.23 129.337  12
  -2  17  -3 1191.71 126.012   5
  -2  17  -4 1086.01 116.889   5
  -2  17  -5 1271.17 130.093   5
  -2  17  -6 758.875 86.5762   5
  -2  17  -7 85.9288 27.9258   5
   2  18  -4 118.855 46.2759  12
   2  18  -3 112.181 55.2687  12
   2  18  -2 664.155 87.5628  12
  -2  18   2 525.391 66.2802   5
   2  18  -1 1909.73 179.474  12
  -2  18   1 1669.19 157.792   5
  -2  18   0 2033.18 195.874  12
   2  18   0 2241.43 196.746  12
  -2  18   0 1779.88 171.552   5
  -2  18  -1 1866.39 173.183  12
  -2  18  -1 1545.38 149.262   5
  -2  18  -2 463.823 84.6197  12
   2  18   2 559.499 83.8275  12
  -2  18  -2 549.815 66.8437   5
  -2  18  -3 262.939 45.4776   5
   2  18   3 223.226 59.6323  12
  -2  18  -4 227.575 45.0734   5
  -2  18  -5 459.346 60.9203   5
  -2  18  -6 486.365 58.1337   5
   2  19  -3 251.167 60.6736  12
  -2  19   2 123.154 34.3244   5
   2  19  -2 98.4974 58.1039  12
  -2  19   1 16.2420 24.4986   5
   2  19  -1 56.6069 62.7954  12
  -2  19   0 393.033 79.7403  12
   2  19   0 525.502 84.7615  12
  -2  19   0 403.179 53.6815   5
  -2  19  -1 38.5488 24.5184   5
  -2  19  -1 14.6788 57.8292  12
  -2  19  -2 205.202 38.8461   5
   2  19   2 243.249 65.6945  12
   2  19   3 287.048 61.2562  12
  -2  19  -3 309.489 46.3412   5
  -2  19  -4 632.241 71.4176   5
  -2  19  -5 400.653 49.9460   5
   2  20  -2 489.923 81.7122  12
   2  20  -1 541.191 85.6002  12
  -2  20   1 454.369 57.0178   5
  -2  20   0 114.045 29.5897   5
   2  20   0 101.864 62.0889  12
  -2  20  -1 410.394 51.6097   5
   2  20   2 439.811 73.7509  12
  -2  20  -2 415.973 52.4156   5
  -2  20  -3 59.4994 24.9970   5
  -2  20  -4 13.3489 19.4360   5
  -2  21   1 85.3142 27.0672   5
   2  21  -1 130.413 55.3981  12
  -2  21   0 30.6426 21.2885   5
   2  21   0 78.0857 50.4425  12
  -2  21  -1 59.2234 23.8211   5
  -2  21  -2 21.9395 19.3943   5
  -2  21  -3 120.721 25.1075   5
  -2  22   0 167.386 27.9738   5
  -2  22  -1 43.1245 18.1676   5
   3   0   0 2.08379 5.43583   6
   3   0  -1 1345.39 110.137   7
   3   0  -2 6486.02 503.279   7
   3   0  -3 8100.19 629.450   7
   3   0  -4 2960.06 243.581   7
  -3   0  -5 3699.52 309.499   7
   3   0  -5 3823.58 308.710   7
   3   0   6 1561.02 143.275   4
  -3   0  -6 1786.22 160.455   7
   3   0  -6 1759.68 156.574   7
   3   0   6 1863.21 142.780   9
  -3   0   7 5.25600 28.9897   1
  -3   0   7 11.0705 13.0373   8
  -3   0   7 8.59736 13.9754   9
   3   0   7 7.10259 10.9416  10
   3   0   8 847.676 120.329   1
  -3   0   8 835.762 116.889   1
  -3   0   8 981.676 85.6412   8
   3   0   8 952.310 87.0965  10
  -3   0   8 983.851 87.0538  10
  -3   0   9 58.0229 35.1582   1
   3   0   9 75.4216 44.6044   1
   3   0   9 37.7020 20.6855  10
  -3   0   9 25.9772 16.2534  10
  -3   0  10 222.280 30.4400  10
  -3   0  11 93.2601 18.3001  10
  -3   1  11 229.218 28.9362  10
  -3   1  10 733.637 70.2813  10
  -3   1   9 2536.02 245.797   1
   3  -1   9 2331.02 248.383   1
  -3   1   9 2607.54 207.487  10
   3  -1   9 2494.06 208.033  10
  -3   1   8 566.223 89.5826   1
   3  -1   8 714.249 102.455   1
  -3   1   8 580.818 58.8408   8
  -3   1   8 688.064 61.6375  10
   3  -1   8 613.880 60.5960  10
  -3   1   8 545.686 57.8948   9
  -3   1   7 151.940 46.9047   1
   3  -1   7 153.712 23.0363  10
  -3   1   7 179.255 24.1512   8
  -3   1   7 126.131 23.1092   9
   3   1  -6 194.634 41.0907   7
  -3   1   6 241.553 49.3289   1
   3  -1   6 141.997 26.0792   4
  -3   1   6 183.708 24.7107   8
   3   1  -5 167.544 35.6662   7
  -3   1   5 172.789 41.1447   1
  -3  -1  -5 128.370 30.5072   7
   3   1  -4 665.689 71.5163   7
   3   1  -3 512.397 54.9342   7
   3   1  -2 1013.85 89.4991   7
  -3   1   1 6050.62 473.862   1
   3   1  -1 6337.11 477.120   7
   3  -1   0 3263.46 251.465   6
   3   1   1 6634.48 509.922   1
   3  -1  -2 1056.83 90.5119   7
   3  -1  -3 543.021 54.6982   7
   3  -1  -4 747.957 73.7418   7
  -3   1  -5 77.9870 26.6427   7
   3  -1  -5 70.7565 25.7737   7
   3   1   6 203.013 27.8056   9
   3   1   6 272.637 27.8370  10
   3   1   6 193.090 26.3346   8
  -3   1  -6 210.864 45.0446   7
   3   1   7 110.414 20.1947  10
  -3  -1   7 114.377 19.7638   8
  -3  -1   7 96.9151 19.0642   9
   3   1   7 112.095 44.8603   1
  -3  -1   7 66.6270 40.1218   1
  -3  -1   8 599.004 60.7500  10
   3   1   8 699.710 63.7155  10
  -3  -1   8 598.891 59.6655   8
  -3  -1   8 676.416 98.3628   1
   3   1   8 591.672 93.0227   1
  -3  -1   9 2848.84 221.494  10
   3   1   9 2603.02 222.606  10
   3   1   9 2792.77 265.698   1
  -3  -1   9 2573.43 259.917   1
  -3  -1  10 596.064 58.3770  10
  -3  -1  11 255.748 29.7821  10
  -3   2  11 27.8862 13.5076  10
   3   2 -11 93.6393 32.5990   5
  -3   2  10 432.134 48.0737  10
   3  -2   9 462.472 89.2924   1
  -3   2   9 379.488 76.1064   1
  -3   2   9 480.417 50.3116  10
   3  -2   9 432.146 49.6132  10
  -3   2   8 150.180 50.4015   1
   3  -2   8 104.673 54.3569   1
   3  -2   8 150.009 26.4326  10
  -3   2   8 163.617 26.9217  10
  -3   2   8 151.330 25.2463   9
  -3   2   8 174.966 26.6160   8
   3   2  -7 296.537 59.7937   7
   3  -2   7 411.547 42.7608  10
  -3   2   7 399.422 42.6980   9
  -3   2   7 444.283 43.5050   8
  -3   2   7 375.226 67.7486   1
  -3   2   6 2027.71 180.975   1
   3   2  -6 1719.54 168.213   7
  -3   2   6 1862.96 146.843   9
  -3   2   6 1918.96 148.251   8
   3  -2   6 1568.30 148.263   4
   3   2  -5 4296.11 330.860   7
  -3  -2  -5 3798.07 316.070   7
   3  -2   5 3735.89 310.095   4
  -3   2   4 946.751 95.0575   1
   3   2  -4 811.130 87.6334   7
  -3   2   3 2525.81 204.967   1
   3   2  -3 2328.74 200.067   7
  -3   2   2 4493.42 333.334   1
   3   2  -2 3955.03 332.057   7
  -3   2   1 3510.73 285.551   1
   3   2  -1 3927.53 289.427   7
  -3   2   0 6975.56 567.202   2
   3   2   1 3388.83 260.624   6
   3  -2  -1 3314.45 258.659   6
   3   2   1 3473.15 262.839   1
   3   2   2 3462.44 276.207   1
   3  -2  -3 2008.06 168.096   7
   3   2   3 2253.36 180.268   1
   3  -2  -4 802.068 74.0810   7
   3   2   4 771.003 88.1384   1
   3  -2  -5 3901.85 303.081   7
  -3   2  -5 4348.62 322.073   7
   3   2   5 3584.57 297.733   4
   3   2   6 1397.73 138.929   4
   3   2   6 1748.93 138.414  10
   3   2   6 1862.71 139.552   9
  -3   2  -6 1728.34 164.870   7
   3   2   6 1721.10 137.909   8
   3   2   7 399.609 42.7757  10
   3   2   7 399.892 43.2446   9
  -3  -2   7 412.243 41.4672   8
  -3   2  -7 356.254 66.0712   7
   3   2   7 398.861 69.8681   1
  -3  -2   8 136.603 22.4435  10
   3   2   8 123.793 23.4756  10
   3   2   8 163.192 52.7256   1
  -3  -2   8 76.4346 46.8154   1
  -3  -2   9 549.618 55.2236  10
   3   2   9 562.634 58.0491  10
   3   2   9 499.189 89.1383   1
  -3  -2   9 511.724 91.7661   1
  -3  -2  10 351.834 38.9458  10
  -3   2 -11 82.5716 31.7564   5
  -3   3  11 161.727 24.9558  10
   3   3 -11 217.725 42.5474   5
  -3   3  10 842.220 78.9798  10
  -3   3   9 770.211 71.0248  10
   3  -3   9 669.386 68.7438  10
   3  -3   8 595.448 107.427   1
  -3   3   8 383.772 79.2484   1
   3  -3   8 558.569 58.0864  10
  -3   3   8 579.691 57.5811   9
  -3   3   8 654.953 60.7008  10
  -3   3   8 614.331 58.7435   8
   3   3  -7 103.632 38.5759   7
  -3   3   7 70.6481 40.3083   1
   3  -3   7 84.7527 17.9836  10
  -3   3   7 71.4167 17.7736   8
  -3   3   7 83.5342 19.5411   9
   3   3  -6 53.7186 31.9831   7
  -3   3   6 64.9844 31.3981   1
  -3   3   6 53.9932 15.7618   8
  -3   3   6 60.5206 16.1397   9
   3  -3   6 34.0113 18.2500   4
  -3   3   5 987.346 101.642   1
   3   3  -5 946.502 97.9688   7
   3  -3   5 814.582 76.5468   4
  -3   3   4 4367.62 336.741   1
   3   3  -4 3769.23 330.143   7
  -3   3   3 1619.29 138.281   1
   3   3  -3 1483.54 136.041   7
  -3   3   2 420.848 44.7969   1
   3   3  -2 420.078 47.7587   7
  -3   3   1 1119.44 97.9834   2
   3   3   0 4584.03 357.009   7
   3  -3  -1 641.493 51.7905   6
   3   3   1 604.808 53.7831   6
   3   3   1 723.191 63.5258   2
   3   3   2 340.248 39.0159   1
   3   3   3 1766.81 154.374   1
   3   3   4 4278.91 353.314   1
   3   3   5 576.248 54.8753   4
  -3   3  -5 600.512 75.3567   7
   3   3   6 26.6452 16.9820   4
  -3   3  -6 20.6599 27.0133   7
   3   3   6 13.3021 27.9301   1
   3   3   7 58.9057 16.3361  10
  -3   3  -7 24.9901 38.6808   7
  -3  -3   7 50.8146 15.1951   8
   3   3   7 36.5823 35.5068   1
  -3  -3   8 651.470 58.8029  10
   3   3   8 530.138 59.7867  10
  -3  -3   8 640.230 103.808   1
   3   3   8 560.897 90.7336   1
   3   3   9 654.068 71.1129  10
  -3  -3   9 783.676 69.2368  10
  -3  -3  10 742.426 68.0312  10
  -3   3 -11 159.306 39.1334   5
   3   4 -11 28.9977 34.0065   5
  -3   4   9 540.788 56.0426   9
   3  -4   9 590.343 57.7700  10
  -3   4   8 243.929 62.3282   1
  -3   4   8 267.212 35.1097   8
  -3   4   8 241.088 33.5345   9
   3  -4   8 326.032 36.7946  10
  -3   4   7 1030.05 120.117   1
   3  -4   7 1021.21 84.6033  10
   3   4  -7 999.775 118.274   7
  -3   4   7 859.552 83.3344   8
  -3   4   7 916.829 83.9057   9
   3   4  -6 97.4528 39.5102   7
   3  -4   6 104.646 23.0572   4
  -3   4   6 116.025 38.1125   1
  -3   4   6 98.2023 18.8255   9
   3  -4   5 132.588 23.9342   4
   3   4  -5 155.010 39.4770   7
  -3   4   5 198.163 42.7181   1
  -3   4   4 591.379 71.9587   1
   3   4  -4 571.751 70.1345   7
   3   4  -3 131.594 30.8220   7
  -3   4   3 133.714 28.7303   1
   3   4  -2 5772.08 454.782   7
  -3   4   1 5381.84 430.118   2
   3   4   0 3966.43 311.382   7
   3   4   1 4254.25 335.373   6
   3   4   1 4685.45 351.412   2
   3  -4  -2 4949.18 378.473   6
   3   4   3 161.874 31.1568   1
   3   4   4 499.310 64.7194   1
   3   4   5 59.9313 17.0656   4
  -3   4  -5 107.367 37.1591   7
   3   4   5 109.672 35.0719   1
   3   4   6 229.345 29.1588   4
   3   4   6 194.649 25.5834  10
   3   4   6 204.241 26.5444   9
  -3   4  -6 224.761 51.6552   7
   3   4   6 194.501 25.3241   8
   3   4   6 208.369 50.4949   1
  -3   4  -7 1016.64 120.739   7
   3   4   7 808.066 110.753   1
   3   4   8 466.096 81.7505   1
  -3  -4   8 419.028 44.6233  10
   3   4   9 606.153 65.9606  10
  -3  -4   9 677.294 61.8189  10
  -3  -4  10 111.429 19.0321  10
  -3   4 -11 20.7061 31.9521   5
   3   5 -11 490.157 70.3371   5
   3   5 -10 643.850 76.5872   5
  -3   5   9 376.347 42.4761   9
  -3   5   9 368.870 43.3602  10
  -3   5   8 279.212 36.5843   9
   3  -5   8 292.872 36.2571  10
  -3   5   8 305.853 37.4281  10
   3   5  -8 252.470 68.0764   7
   3  -5   7 623.346 57.8012  10
   3   5  -7 613.686 93.0276   7
  -3   5   7 555.087 57.2275   9
  -3   5   7 543.591 85.7900   1
  -3   5   6 484.000 72.1714   1
  -3   5   6 390.034 43.6430   9
   3   5  -6 447.931 70.3616   7
  -3   5   6 450.988 45.7043   8
   3  -5   6 468.069 48.7727   4
  -3   5   5 897.122 108.141   1
   3   5  -5 994.209 108.090   7
   3  -5   5 987.172 86.5060   4
  -3   5   4 2152.96 192.305   1
   3   5  -4 2098.51 190.433   7
   3   5  -3 276.495 45.2135   7
  -3   5   2 2116.36 182.998   2
  -3   5   1 930.915 101.972   2
   3   5  -1 894.902 83.4925   7
   3   5   0 1054.88 92.3106   7
   3   5   1 1101.52 89.1138   6
   3   5   1 980.705 112.239   2
   3   5   2 1751.77 154.325   2
   3   5   4 1668.50 156.167   1
   3   5   5 850.567 79.7827   4
  -3   5  -5 1033.82 108.432   7
   3   5   5 1179.31 111.451   1
   3   5   6 479.834 50.8861   4
   3   5   6 616.930 81.9249   1
   3   5   6 495.793 48.6799   8
  -3   5  -6 551.885 83.3625   7
   3   5   6 514.308 49.5002   9
   3   5   6 520.779 50.0432  10
   3   5   7 510.612 85.1330   1
   3   5   7 589.692 56.7549  10
   3   5   7 524.299 54.0699   9
  -3   5  -7 591.474 92.5499   7
  -3   5  -8 216.424 68.1961   7
   3   5   8 250.736 36.6550  10
  -3  -5   8 284.386 32.4210  10
  -3  -5   9 504.876 49.8019  10
  -3  -5  10 466.437 45.1126  10
  -3   5 -10 484.017 63.9613   5
  -3   5 -11 341.052 58.2096   5
  -3   6  10 68.9573 19.2933  10
   3   6 -10 137.530 42.4671   5
  -3   6   9 1189.36 105.792   9
  -3   6   9 1048.73 105.844  10
  -3   6   8 1377.17 113.871  10
  -3   6   8 1207.20 111.471   9
   3   6  -8 1338.81 163.633   7
  -3   6   8 1248.69 163.276   2
  -3   6   7 1312.12 120.415   9
   3   6  -7 1451.83 162.774   7
  -3   6   7 1538.73 121.877   8
  -3   6   7 1388.56 120.920  10
  -3   6   6 1124.95 91.1231   8
   3   6  -6 950.081 119.527   7
  -3   6   6 946.467 88.3131   9
   3   6  -5 1534.73 163.292   7
   3  -6   5 1739.97 141.570   4
   3   6  -4 776.429 89.6928   7
  -3   6   3 4266.26 341.157   2
   3   6  -3 3888.61 332.919   7
  -3   6   2 791.421 88.3832   2
  -3   6   1 8174.94 705.593   2
   3   6  -1 8868.86 676.322   7
   3   6   0 9277.25 717.873   7
   3   6   1 10312.0 767.022   6
   3   6   1 8331.52 799.440   2
   3   6   2 916.975 97.8742   2
   3   6   3 3704.24 312.379   2
  -3   6  -5 1555.74 146.441   7
   3   6   5 1342.43 114.778   4
   3   6   6 1061.22 91.7434   9
   3   6   6 1020.96 92.8958  10
  -3   6  -6 1120.87 128.722   7
   3   6   6 1099.99 91.4091   8
   3   6   7 1343.36 119.475   9
   3   6   7 1467.42 123.240  10
  -3   6  -7 1636.21 170.446   7
  -3  -6   8 1171.73 96.7692  10
   3   6   8 1078.75 97.8039   9
   3   6   8 1030.44 101.178  10
  -3   6  -8 1119.59 150.006   7
   3   6   8 1471.36 163.069   2
  -3  -6   9 1256.09 100.096  10
   3   6   9 1023.93 103.933  10
  -3   6  -9 1208.95 121.676   5
  -3   6 -10 84.0263 37.3650   5
  -3   7  10 833.239 74.4089  10
   3   7 -10 713.086 95.1820   5
  -3   7   9 414.964 46.5444   9
  -3   7   9 420.269 47.1334  10
   3   7  -9 467.783 70.3440   5
   3   7  -8 762.727 86.6533   5
   3   7  -8 577.977 105.064   7
  -3   7   8 615.325 109.330   2
  -3   7   8 598.925 60.8349  10
  -3   7   8 641.466 61.8531   9
  -3   7   8 517.977 58.4968   8
   3   7  -7 57.5812 47.0066   7
  -3   7   7 68.7644 52.7524   2
  -3   7   7 69.1612 19.1854   8
  -3   7   7 76.5420 21.7202   9
  -3   7   7 79.9571 19.2193  10
  -3   7   6 1108.20 138.335   2
  -3   7   6 1020.80 91.5144   8
   3   7  -6 1094.75 129.035   7
  -3   7   5 1436.13 158.165   2
   3   7  -5 1350.35 145.573   7
  -3   7   4 784.093 102.523   2
   3   7  -4 919.737 99.7963   7
  -3   7   3 5771.09 477.038   2
  -3   7   2 557.661 83.0859   2
   3   7  -2 660.251 71.3159   7
  -3   7   1 3001.82 291.130   2
   3   7  -1 3047.84 249.487   7
   3   7   0 4088.39 326.192   7
   3   7   1 3670.31 276.539   6
   3   7   1 2644.48 316.729   2
   3   7   2 560.249 79.9680   2
   3   7   3 4997.72 417.689   2
  -3   7  -4 530.416 75.2309   7
   3   7   4 566.742 80.1912   2
   3   7   5 1070.37 92.8595   4
  -3   7  -5 1067.36 123.050   7
   3   7   5 1238.58 136.835   2
   3   7   6 1272.93 149.043   2
   3   7   6 1132.71 99.6778  10
  -3   7  -6 1168.74 136.777   7
   3   7   6 1191.97 98.3240   9
   3   7   6 1084.07 96.6752   8
  -3   7  -7 91.0066 51.6365   7
   3   7   7 61.5520 48.7068   2
   3   7   7 70.5982 19.3950  10
   3   7   7 79.4154 19.8335   9
  -3   7  -8 578.403 103.684   7
   3   7   8 603.025 107.026   2
   3   7   8 490.220 55.1651  10
   3   7   8 480.470 51.5859   9
  -3   7  -8 545.665 80.2263   5
  -3   7  -9 412.131 67.6914   5
  -3   7 -10 625.700 85.0541   5
   3   8 -10 3.80753 47.1822   5
  -3   8   9 574.638 60.0445   9
  -3   8   9 629.049 61.1792  10
   3   8  -9 660.440 91.3350   5
   3   8  -8 663.202 85.7445   5
   3   8  -8 390.083 97.6121   7
  -3   8   8 368.954 93.5307   2
  -3   8   8 476.395 51.4989  10
  -3   8   8 491.997 51.1490   8
   3   8  -7 261.820 74.0145   7
  -3   8   7 255.015 77.5268   2
  -3   8   7 272.069 33.8926  10
  -3   8   7 232.545 32.6290   8
   3   8  -6 369.661 75.2858   7
  -3   8   6 336.556 40.0803  10
  -3   8   6 419.574 42.7619   8
  -3   8   6 300.944 79.2535   2
  -3   8   5 3318.58 333.145   2
   3   8  -5 3491.96 320.652   7
  -3   8   5 3478.66 286.088   8
  -3   8   4 4042.54 358.973   2
   3   8  -4 3993.92 343.335   7
  -3   8   3 108.098 45.6240   2
  -3   8   2 478.922 93.3585   2
   3   8  -2 774.523 79.0950   7
  -3   8   1 613.887 108.061   2
   3   8  -1 667.915 71.8629   7
  -3   8   1 629.863 60.1721   7
   3   8   0 1440.31 127.847   7
   3   8   1 822.174 69.1058   6
   3   8   1 621.526 120.760   2
   3   8   2 452.817 83.8266   2
   3   8   3 158.054 50.5448   2
  -3   8  -4 3602.85 317.408   7
   3   8   4 3775.73 332.623   2
  -3   8  -5 3881.64 272.624   5
   3   8   5 2998.19 243.277  10
   3   8   5 3217.76 241.861   9
  -3   8  -5 2785.66 274.353   7
   3   8   5 2831.75 240.060   8
   3   8   5 3239.81 295.438   2
  -3   8  -6 421.526 65.4564   5
   3   8   6 264.230 75.1577   2
   3   8   6 355.021 40.8543  10
  -3   8  -6 304.963 70.6275   7
   3   8   6 353.956 38.6594   9
  -3   8  -7 233.990 66.9885   7
   3   8   7 193.760 70.1002   2
   3   8   7 213.880 30.2103   9
   3   8   7 223.090 32.9400  10
  -3   8  -7 225.255 57.3611   5
   3   8   8 369.581 41.9777   9
   3   8   8 399.087 46.3200  10
  -3   8  -8 258.736 69.6811   5
   3   8   8 303.388 81.9937   2
  -3   8  -9 433.770 79.9034   5
  -3   8 -10 19.1208 45.2500   5
   3   9 -10 211.831 60.7173   5
   3   9  -9 957.084 127.194   5
  -3   9   9 1041.15 91.5075  10
   3   9  -8 643.399 105.761   5
  -3   9   8 700.441 70.0888  10
  -3   9   8 814.277 70.6352   8
   3   9  -7 596.768 91.0409   5
   3   9  -7 596.012 99.7885   7
  -3   9   7 411.754 103.026   2
  -3   9   7 501.910 51.7992  10
  -3   9   7 469.920 50.3720   8
   3   9  -6 77.8807 55.2582   5
   3   9  -6 128.943 55.8828   7
  -3   9   6 148.315 65.8689   2
  -3   9   6 60.9628 17.0463  10
  -3   9   6 71.8018 18.4138   8
  -3   9   6 63.7949 19.6188   9
   3   9  -5 477.644 77.1084   5
   3   9  -5 326.834 65.2173   7
  -3   9   5 344.187 35.9438  10
  -3   9   5 316.685 37.7662   8
  -3   9   5 279.168 77.3458   2
  -3   9   4 967.221 144.217   2
   3   9  -4 1464.22 141.350   5
  -3   9   3 874.425 131.066   2
   3   9  -3 1143.71 114.870   7
  -3   9   2 679.399 116.193   2
   3   9  -2 736.564 84.2442   7
  -3   9   1 1432.82 125.342   7
   3   9  -1 1610.14 138.933   7
   3   9   0 851.288 69.9705   6
   3   9   0 784.750 79.7713   7
  -3   9   0 663.525 76.9307   7
   3   9   1 2034.68 156.709   6
  -3   9  -1 1780.80 172.497   7
  -3   9  -2 764.779 83.1101   7
   3   9   2 528.919 106.873   2
  -3   9  -3 973.947 107.836   7
   3   9   3 911.341 128.216   2
  -3   9  -4 1151.71 123.399   5
   3   9   4 992.107 138.648   2
  -3   9  -5 366.703 68.1909   5
   3   9   5 257.521 34.0772  10
   3   9   5 318.107 33.4803   9
  -3   9  -5 314.831 67.2627   7
   3   9   5 385.141 82.5105   2
  -3   9  -6 146.050 61.2778   5
   3   9   6 62.6500 53.4241   2
   3   9   6 111.058 22.1334  10
  -3   9  -6 90.2394 48.0533   7
   3   9   6 84.5122 19.8913   9
  -3   9  -7 522.751 96.0746   7
   3   9   7 520.367 110.231   2
   3   9   7 504.852 55.0332  10
   3   9   7 507.418 51.2427   9
  -3   9  -7 427.486 90.6140   5
   3   9   8 749.171 68.2974   9
  -3   9  -8 601.282 112.633   5
  -3   9  -9 755.811 110.146   5
  -3   9 -10 280.034 64.0994   5
   3  10 -10 25.3740 38.1663   5
   3  10  -9 79.1177 60.6096   5
  -3  10   8 453.360 49.3843  10
  -3  10   8 525.195 53.1416   9
   3  10  -8 459.626 99.3804   5
   3  10  -7 138.585 81.3253   5
   3  10  -7 154.882 59.8795   7
  -3  10   7 129.440 79.7470   2
  -3  10   7 71.3483 18.0309  10
  -3  10   7 79.9425 19.7239   8
  -3  10   7 112.916 24.3126   9
   3  10  -6 226.470 83.2582   5
   3  10  -6 181.399 61.4082   7
  -3  10   6 285.499 32.7775  10
  -3  10   6 220.364 33.9303   9
  -3  10   6 294.440 33.0557   8
  -3  10   6 194.028 90.0713   2
  -3  10   5 510.315 117.840   2
  -3  10   5 576.029 54.6234   8
   3  10  -5 546.054 90.0666   7
   3  10  -5 558.124 101.042   5
  -3  10   4 1123.62 146.036   2
   3  10  -4 404.847 110.167   5
  -3  10   3 972.734 155.664   2
   3  10  -3 1300.42 129.780   7
   3  10  -2 184.139 43.2921   7
  -3  10   2 201.304 74.5748   2
  -3  10   1 116.310 23.2688   7
   3  10  -1 86.3639 33.5902   7
   3  10   0 108.742 31.4656   7
   3  10   0 112.940 20.1544   6
  -3  10   0 106.258 29.9065   7
  -3  10  -1 153.601 37.1851   7
  -3  10  -2 181.071 43.8934   7
   3  10   2 139.558 69.2280   2
  -3  10  -3 1177.92 118.674   7
   3  10   3 757.268 142.417   2
   3  10   4 1011.09 143.136   2
  -3  10  -4 640.483 108.289   5
   3  10   5 614.286 120.407   2
   3  10   5 575.402 53.4353   9
  -3  10  -5 589.149 91.9205   7
  -3  10  -5 388.199 96.8592   5
   3  10   6 153.422 74.5648   2
  -3  10  -6 124.426 72.1458   5
   3  10   6 244.410 29.6109   9
  -3  10  -6 162.081 54.0717   7
  -3  10  -7 74.6143 51.4507   7
  -3  10  -7 58.3429 74.0038   5
   3  10   7 113.872 22.1500   9
   3  10   7 35.0465 77.9485   2
   3  10   8 411.146 40.7175   9
  -3  10  -8 59.6289 75.2888   5
  -3  10  -9 43.6378 58.7270   5
  -3  10 -10-12.6038 35.8320   5
  -3  11   9 286.486 31.3525   9
   3  11  -9 51.5812 54.8454   5
  -3  11   8 262.670 34.1068   9
   3  11  -8 98.7154 78.9618   5
   3  11  -7 169.213 63.2398   7
  -3  11   7 112.814 84.6998   2
   3  11  -7 107.057 91.4644   5
  -3  11   7 214.505 32.2641   9
  -3  11   7 199.008 26.4071   8
   3  11  -6 134.268 55.0837   7
  -3  11   6 114.764 21.2809  10
  -3  11   6 129.276 21.5058   8
  -3  11   6 148.682 27.2629   9
  -3  11   6 83.1988 78.9092   2
  -3  11   5 169.477 93.9245   2
   3  11  -5 166.440 89.6145   5
  -3  11   5 233.512 28.5446   8
  -3  11   4 150.046 38.2481  12
   3  11  -4 163.187 50.7317   7
   3  11  -4 28.0055 66.9705   5
  -3  11   4 60.7794 74.0250   2
  -3  11   3 611.275 134.798   2
   3  11  -3 583.739 76.0290  12
  -3  11   3 652.086 73.8031  12
   3  11  -3 650.758 109.533   5
   3  11  -3 822.315 97.4317   7
   3  11  -2 811.356 95.8785   7
   3  11  -1 1022.33 106.549   7
  -3  11   0 1335.36 126.244   7
   3  11   0 1395.63 129.307   7
  -3  11  -1 714.820 83.3603   7
  -3  11  -2 961.775 107.344   7
   3  11   3 622.363 134.627   2
   3  11   3 571.720 74.6034  12
  -3  11  -3 762.819 79.7053  12
   3  11   3 788.149 81.5629   5
  -3  11  -3 908.582 114.377   5
  -3  11  -3 931.327 101.459   7
   3  11   4 94.6088 68.4184   2
   3  11   4 233.423 25.2474   9
  -3  11  -4 252.572 59.3987   7
   3  11   4 142.792 38.3003  12
   3  11   5 316.208 109.518   2
  -3  11  -5 220.321 91.2179   5
   3  11   5 232.855 29.2524   9
  -3  11  -6 192.163 62.5829   7
   3  11   6 135.499 89.7324   2
  -3  11  -6 86.8282 94.5902   5
   3  11   6 216.416 28.4158   9
  -3  11  -7 227.204 63.9882   7
   3  11   7 196.153 27.6018   9
  -3  11  -7 216.351 98.3623   5
   3  11   7 139.537 90.6479   2
  -3  11  -8-7.34119 78.6785   5
   3  11   8 249.748 29.6718   9
  -3  11  -9-9.66860 54.3098   5
   3  12  -9 129.914 49.3758   5
  -3  12   9 147.656 22.2473   9
   3  12  -8 261.036 84.5522   5
  -3  12   8 339.888 38.6378   9
  -3  12   7 197.032 30.9116   9
  -3  12   6 300.599 135.038   2
   3  12  -6 136.858 99.8182   5
  -3  12   6 379.308 40.0115   8
  -3  12   6 453.674 46.7546   9
   3  12  -6 316.999 77.7806   7
   3  12  -5 354.402 79.5927   7
  -3  12   5 397.899 39.4750   8
  -3  12   4 207.320 45.2495  12
   3  12  -4 224.655 65.5907   7
   3  12  -4 271.605 83.0818   5
  -3  12   4 154.331 97.6911   2
  -3  12   3 354.868 53.3167  12
   3  12  -3 338.793 55.7533  12
   3  12  -3 450.023 74.6824   7
  -3  12   3 502.161 58.0232   5
   3  12  -3 282.216 71.9707   5
  -3  12   3 265.107 101.582   2
  -3  12   2 29.6503 23.2082   5
   3  12  -2 11.9213 36.3484   5
   3  12  -2 4.64374 33.3991  12
  -3  12   2-3.80080 26.8348  12
   3  12  -2 8.48743 30.9695   7
   3  12  -1 451.026 60.0250  12
  -3  12   1 356.144 54.1538  12
  -3  12   1 470.743 56.2713   5
   3  12  -1 460.890 64.9253   5
   3  12  -1 561.943 69.6350   7
   3  12   0 448.583 60.8828  12
  -3  12   0 391.360 55.5505  12
  -3  12   0 547.844 61.0745   5
   3  12   0 435.281 59.9363   5
  -3  12   0 486.805 60.1610   7
   3  12   0 390.334 59.1028   7
   3  12   1 281.180 52.3708  12
  -3  12  -1 314.632 49.6637  12
   3  12   1 388.275 51.2113   5
  -3  12  -1 385.065 56.4539   5
  -3  12  -1 374.361 57.0930   7
  -3  12  -2 7.37982 34.0468   5
   3  12   2 17.2901 25.1143   5
  -3  12  -2 4.17397 30.0094   7
  -3  12  -2-2.06148 27.7281  12
   3  12   2-19.7795 31.9483  12
   3  12   3 200.981 93.2029   2
   3  12   3 285.758 47.9092   5
  -3  12  -3 241.259 66.8640   5
  -3  12  -3 328.090 62.1523   7
  -3  12  -3 271.643 51.0604  12
   3  12   3 227.313 45.9309  12
   3  12   4 266.093 47.8292  12
  -3  12  -4 243.011 83.6632   5
   3  12   4 276.153 30.7573   9
  -3  12  -4 372.398 69.5221   7
  -3  12  -5 207.944 61.1342   7
   3  12   5 317.697 33.6590   9
   3  12   6 342.474 37.3297   9
  -3  12  -6 104.080 103.989   5
   3  12   6 293.271 123.022   2
  -3  12  -7 43.7996 93.4325   5
   3  12   7 372.085 38.2275   9
  -3  12  -8 381.019 95.6184   5
  -3  12  -9 51.2585 42.0457   5
   3  13  -9 128.045 35.9569   5
  -3  13   8 40.0834 16.7074   9
   3  13  -8 23.8325 47.8348   5
  -3  13   7 358.154 41.3563   9
  -3  13   6 28.9108 18.4288   9
  -3  13   6 86.6241 108.948   2
   3  13  -5 776.541 126.397   5
   3  13  -5 784.025 113.361   7
   3  13  -4 1554.94 140.560  12
  -3  13   4 1331.58 134.736  12
   3  13  -4 1512.50 174.225   5
   3  13  -4 1762.47 174.376   7
   3  13  -3 963.926 115.049  12
  -3  13   3 1147.12 114.322  12
  -3  13   3 1386.50 120.744   5
   3  13  -3 1074.07 134.728   5
   3  13  -3 1534.77 149.653   7
  -3  13   2 527.196 69.2139  12
   3  13  -2 628.176 77.5444  12
  -3  13   2 718.222 73.9982   5
   3  13  -2 580.041 81.5067   5
   3  13  -2 654.020 90.0985   7
  -3  13   1 429.014 60.4309  12
   3  13  -1 416.859 63.9925  12
   3  13  -1 427.656 67.3603   7
  -3  13   1 447.410 56.7716   5
   3  13  -1 400.313 62.3259   5
  -3  13   0-2.50118 23.4959   5
   3  13   0-10.8421 24.5680   5
   3  13   0-23.8894 36.4511  12
  -3  13   0-4.35565 31.0912  12
   3  13   1 399.174 64.3207  12
  -3  13  -1 461.528 61.9111  12
  -3  13  -1 416.771 60.2195   5
   3  13   1 454.458 58.5227   5
  -3  13  -1 478.999 67.4549   7
   3  13   2 585.638 78.9225  12
  -3  13  -2 663.734 77.6570  12
   3  13   2 763.088 80.6701   5
  -3  13  -2 703.750 86.7340   5
  -3  13  -2 747.732 94.0986   7
   3  13   3 865.569 100.557  12
  -3  13  -3 962.639 104.674  12
   3  13   3 1090.79 107.615   5
  -3  13  -3 1029.85 122.919   5
  -3  13  -3 1177.50 128.397   7
   3  13   4 1509.48 153.423  12
  -3  13  -4 1675.37 190.332   5
   3  13   4 1858.57 140.376   9
  -3  13  -4 1774.41 185.463   7
  -3  13  -5 814.971 135.583   5
  -3  13  -5 745.184 116.656   7
   3  13   5 926.271 77.4697   9
   3  13   5 572.852 173.526   2
  -3  13  -6 142.271 84.0465   5
   3  13   6 80.4566 18.1937   9
   3  13   6 16.9063 95.7154   2
  -3  13  -7 175.116 85.4367   5
  -3  13  -8 63.9237 51.3174   5
  -3  13  -9 96.6543 35.3425   5
   3  14  -8 586.535 84.8447   5
  -3  14   8 721.033 62.4387   9
  -3  14   7 1026.37 90.0811   9
  -3  14   6 80.8638 21.0585   9
   3  14  -5 95.7241 58.0019   7
  -3  14   5 60.8543 18.9765   9
   3  14  -4 170.311 65.0729   5
  -3  14   4 113.566 43.9050  12
   3  14  -4 140.421 47.0507  12
   3  14  -4 136.457 60.8226   7
   3  14  -3 75.0705 43.2877   5
  -3  14   3 49.8818 29.0486   5
  -3  14   3 20.4221 39.1385  12
   3  14  -3-11.4256 44.7569  12
   3  14  -3 23.3561 40.1616   7
  -3  14   2 1265.14 128.824  12
   3  14  -2 1357.09 135.453  12
  -3  14   2 1550.95 130.855   5
   3  14  -2 1174.18 134.317   5
   3  14  -2 1346.57 149.352   7
  -3  14   1 1975.67 186.063  12
   3  14  -1 2053.36 191.818  12
   3  14  -1 1797.67 187.109   5
  -3  14   1 2314.38 187.173   5
  -3  14   0 552.036 71.9981  12
   3  14   0 469.596 77.5180  12
   3  14   0 656.134 73.8625   5
  -3  14   0 627.343 70.5215   5
   3  14   1 1826.70 179.300  12
  -3  14  -1 1917.41 176.602  12
   3  14   1 2054.43 177.115   5
  -3  14  -1 1981.50 177.677   5
  -3  14  -1 2029.43 187.171   7
   3  14   2 893.502 103.642  12
  -3  14  -2 1044.26 102.846  12
   3  14   2 925.137 100.089   5
  -3  14  -2 911.016 105.593   5
  -3  14  -2 1016.68 117.279   7
   3  14   3 51.0587 33.7124   5
  -3  14  -3 42.0738 39.9271   5
   3  14   3 16.1643 36.9262  12
  -3  14  -3 11.3718 41.1065  12
  -3  14  -3 39.1461 37.8512   7
  -3  14  -4 208.508 64.6161   5
   3  14   4 174.526 46.1537  12
  -3  14  -4 123.756 54.5463  12
  -3  14  -4 221.075 66.0503   7
  -3  14  -5 63.8568 49.3112   7
  -3  14  -5 25.5394 61.0942   5
  -3  14  -6 112.718 63.9024   5
  -3  14  -7 1001.31 130.692   5
  -3  14  -8 751.416 92.0592   5
   3  15  -8 54.3281 29.8251   5
   3  15  -7 333.960 64.0500   5
  -3  15   6 569.592 55.6629   9
  -3  15   5 1987.85 163.819   9
   3  15  -4 2466.78 215.452  12
   3  15  -4 2352.65 245.905   7
  -3  15   3 280.129 61.0756  12
   3  15  -3 363.979 65.9840  12
   3  15  -3 375.356 81.5491   7
  -3  15   3 528.449 63.6979   5
   3  15  -2 983.153 110.966  12
  -3  15   2 880.883 104.683  12
  -3  15   2 1114.35 104.620   5
   3  15  -2 927.939 123.472   7
   3  15  -1 784.298 98.7129  12
   3  15  -1 634.763 83.7836   5
  -3  15   1 854.812 84.5204   5
   3  15   0 508.801 79.7301  12
  -3  15   0 471.684 73.0389  12
   3  15   0 539.493 68.3479   5
  -3  15   0 518.909 64.8016   5
  -3  15  -1 819.570 91.4910  12
   3  15   1 735.715 84.7473   5
  -3  15  -1 738.440 84.1593   5
  -3  15  -2 864.739 101.600  12
   3  15   2 907.056 102.705  12
  -3  15  -2 826.219 97.5556   5
   3  15   2 928.585 97.8544   5
  -3  15  -2 966.042 115.654   7
  -3  15  -3 396.296 68.9442   5
  -3  15  -3 473.050 74.5672  12
   3  15   3 503.759 72.6447  12
  -3  15  -3 506.918 84.8247   7
   3  15   4 2307.98 202.873  12
  -3  15  -4 2030.30 228.647   7
  -3  15  -4 2451.36 222.507   5
  -3  15  -5 1779.94 187.035   5
  -3  15  -6 724.247 104.255   5
  -3  15  -7 396.570 68.7128   5
  -3  15  -8 59.5733 29.5717   5
   3  16  -7 386.432 56.5082   5
   3  16  -4 466.497 71.5332  12
  -3  16   3 319.834 54.4476   5
   3  16  -3 335.980 64.5083  12
  -3  16   3 145.895 53.9520  12
   3  16  -3 296.346 71.0653   7
   3  16  -2 621.961 89.2980  12
  -3  16   2 518.060 81.2820  12
  -3  16   2 658.955 74.6542   5
   3  16  -1 2411.84 214.493  12
  -3  16   1 2194.30 198.722   5
  -3  16   0 31.3473 28.6906   5
  -3  16   0 38.6093 46.1326  12
   3  16   0-18.4665 55.2451  12
  -3  16  -1 2149.55 194.645  12
  -3  16  -1 1994.36 183.728   5
   3  16   2 716.478 91.5975  12
  -3  16  -2 710.845 90.0066  12
  -3  16  -2 555.717 75.7374   5
  -3  16  -3 244.109 51.6262   5
  -3  16  -3 215.270 63.3108  12
   3  16   3 240.953 60.3753  12
  -3  16  -3 263.141 64.1617   7
  -3  16  -4 392.671 68.3053   5
   3  16   4 453.791 69.0469  12
  -3  16  -5 438.362 72.7588   5
  -3  16  -6 463.358 71.2743   5
  -3  16  -7 419.876 59.4772   5
   3  17  -7 68.2150 25.2829   5
   3  17  -4 766.452 93.8306  12
   3  17  -3 452.531 73.3462  12
  -3  17   3 457.363 63.9173   5
   3  17  -2 626.008 90.7355  12
  -3  17   2 602.775 86.7818  12
  -3  17   2 611.335 73.5187   5
  -3  17   1 102.472 34.4371   5
   3  17  -1 134.684 67.1077  12
  -3  17   0 1039.33 123.247  12
   3  17   0 1252.73 131.227  12
  -3  17   0 1029.13 107.439   5
  -3  17  -1 184.760 40.1108   5
  -3  17  -1 191.404 67.9150  12
  -3  17  -2 416.888 80.1495  12
   3  17   2 648.055 84.0307  12
  -3  17  -2 517.716 67.0955   5
  -3  17  -3 320.657 54.4256   5
   3  17   3 369.171 65.8537  12
  -3  17  -4 769.247 90.6920   5
  -3  17  -5 657.809 82.2964   5
  -3  17  -6 302.926 51.7719   5
  -3  17  -7 90.7324 26.8011   5
   3  18  -6 83.4509 27.0038   5
   3  18  -4 234.641 53.8214  12
   3  18  -3 592.207 86.6255  12
  -3  18   2 76.6197 30.9367   5
  -3  18   2 9.93145 48.1069  12
   3  18  -2 28.3453 49.5781  12
  -3  18   1 151.268 36.5553   5
   3  18  -1 178.330 69.3027  12
   3  18   0 522.294 84.6686  12
  -3  18   0 288.114 79.7036  12
  -3  18   0 423.347 55.0433   5
  -3  18  -1 130.260 33.4633   5
  -3  18  -1 139.307 66.2660  12
  -3  18  -2 74.2967 29.9503   5
   3  18   2 162.095 58.8775  12
  -3  18  -2 93.1668 56.3957  12
   3  18   3 499.370 74.6590  12
  -3  18  -3 431.266 61.2698   5
  -3  18  -4 257.288 45.4235   5
  -3  18  -5 344.843 52.2050   5
  -3  18  -6 105.166 28.5333   5
   3  19  -5 18.0784 22.6643   5
   3  19  -3-16.6958 47.4344  12
  -3  19   2 62.9054 29.1986   5
   3  19  -2 94.5244 60.1153  12
   3  19  -1 840.372 103.027  12
  -3  19   1 642.349 74.8666   5
  -3  19   0 85.4692 28.1943   5
  -3  19   0 135.274 66.4777  12
   3  19   0 96.3531 59.5863  12
  -3  19  -1 771.842 81.2721   5
  -3  19  -2 122.738 31.6905   5
   3  19   2 102.148 58.2968  12
  -3  19  -3 33.6114 25.0739   5
   3  19   3-13.9400 43.9202  12
  -3  19  -4 180.562 36.4246   5
  -3  19  -5 61.6238 23.9010   5
   3  20  -4 210.485 33.9158   5
   3  20  -2 498.564 76.7454  12
  -3  20   1 73.7126 26.4924   5
   3  20  -1 135.029 68.8480  12
  -3  20   0 36.8582 23.1073   5
   3  20   0 32.2896 60.3941  12
  -3  20  -1 133.583 30.2777   5
   3  20   2 411.317 72.9255  12
  -3  20  -2 442.907 52.8513   5
  -3  20  -3 145.204 31.3530   5
  -3  20  -4 244.971 36.0126   5
   3  21  -3 498.057 52.8591   5
   3  21  -2 120.540 26.8170   5
  -3  21   1 128.566 28.7903   5
   3  21  -1 237.720 60.4947  12
  -3  21   0 9.95863 19.2323   5
   3  21   0 58.8150 55.8469  12
  -3  21  -1 161.357 29.8533   5
  -3  21  -2 194.443 32.1227   5
  -3  21  -3 631.747 62.8901   5
   3  22  -1 451.682 48.1717   5
   3  22   0 1359.92 112.556   5
  -3  22   0 1225.63 111.083   5
  -3  22  -1 332.588 39.0761   5
   4   0   0 1443.15 114.509   6
   4   0  -2 1581.36 133.362   7
   4   0  -3 5764.65 454.105   7
   4   0  -4 342.311 47.0213   7
   4   0   5 1308.61 115.482   4
   4   0  -5 1579.35 131.279   7
   4   0   6 424.766 47.2498   4
   4   0   6 444.371 43.2624  10
   4   0  -6 379.511 55.1151   7
  -4   0   6 471.953 45.0361   8
  -4   0  -6 414.370 59.5341   7
  -4   0   6 484.327 70.8938   1
   4   0   7 1272.42 117.360   4
   4   0   7 1249.62 113.643  10
  -4   0   7 1331.99 112.883   9
  -4   0   7 1457.08 114.204   8
  -4   0   7 1434.86 150.933   1
   4   0   7 1393.29 151.671   1
  -4   0   8 2378.00 206.250   9
   4   0   8 2507.96 209.747  10
  -4   0   8 2710.71 208.499   8
  -4   0   8 2997.75 254.563   1
   4   0   8 2823.92 255.381   1
  -4   0   9 809.682 80.3789  10
   4   0   9 955.908 83.8711  10
  -4   0   9 982.905 119.370   1
   4   0   9 759.062 115.705   1
  -4   0  10 201.641 28.9144  10
  -4   0  11 6.33412 10.9012  10
  -4   1  11 654.785 61.4197  10
  -4   1  10 603.823 60.0464  10
   4  -1   9 93.0188 22.8240  10
  -4   1   9 95.6900 22.4999  10
   4  -1   9 6.26797 46.1276   1
  -4   1   9 55.0463 42.8233   1
   4  -1   8 262.600 35.4450  10
  -4   1   8 234.412 31.8957   9
  -4   1   8 244.844 32.6357   8
  -4   1   8 304.118 59.9270   1
   4  -1   8 265.668 61.8887   1
   4  -1   7 299.010 42.7838   4
  -4   1   7 410.952 40.9020   9
   4  -1   7 367.129 40.6089  10
  -4   1   7 391.016 41.2036   8
  -4   1   7 372.313 64.6429   1
   4  -1   7 481.176 78.3996   1
   4  -1   6 1466.49 132.180   4
   4  -1   6 1526.90 128.731  10
  -4   1   6 1670.12 130.517   8
   4   1  -6 1522.41 147.720   7
  -4   1   6 1772.52 163.933   1
   4   1  -5 1122.33 113.537   7
   4  -1   5 1099.51 98.6147   4
   4   1  -4 5512.96 441.035   7
   4   1  -3 2428.78 201.933   7
   4   1  -2 12315.4 948.906   7
  -4   1   1 2288.28 180.658   1
   4   1  -1 2335.14 186.406   7
   4  -1   0 3194.51 233.504   6
   4   1   0 2843.75 232.678   6
   4  -1  -1 1859.26 146.841   6
   4   1   1 1898.58 148.447   1
   4  -1  -3 2255.22 185.817   7
   4  -1  -4 5782.76 456.829   7
   4  -1  -5 1330.28 125.317   7
   4   1   5 1565.48 145.667   1
   4   1   6 1537.28 127.094  10
   4   1   6 1550.53 127.646   9
  -4   1  -6 1403.12 147.550   7
   4   1   6 1721.66 162.592   1
  -4  -1   7 321.910 37.0610   9
   4   1   7 331.470 38.2904  10
  -4  -1   7 372.041 38.0210   8
   4   1   7 369.529 65.8375   1
  -4  -1   7 404.226 68.6278   1
   4   1   8 166.383 28.5095  10
  -4  -1   8 215.102 28.0803   8
  -4  -1   8 196.886 51.6615   1
   4   1   8 251.236 59.9607   1
   4   1   9 123.404 26.2700  10
  -4  -1   9 140.308 23.9044  10
  -4  -1   9 74.2505 44.7531   1
  -4  -1  10 667.803 63.5361  10
  -4  -1  11 713.697 64.3356  10
   4   2 -11 92.1710 31.8597   5
  -4   2  11 28.6236 13.8518  10
  -4   2  10 376.464 42.8617  10
   4  -2   9 560.929 63.6227  10
  -4   2   9 691.562 65.8164  10
  -4   2   9 707.343 63.7004   8
   4  -2   8 225.786 32.6276  10
  -4   2   8 253.249 32.3902   9
  -4   2   8 274.982 33.8362   8
  -4   2   8 216.235 58.4664   1
   4  -2   8 237.139 66.3372   1
   4  -2   7 852.908 84.4502   4
  -4   2   7 1018.34 114.826   1
   4  -2   7 947.757 81.8227  10
  -4   2   7 829.293 79.8262   9
  -4   2   7 983.970 82.2491   8
   4   2  -7 858.922 103.333   7
   4  -2   6 212.897 32.3493   4
   4   2  -6 241.565 49.4585   7
  -4   2   6 216.648 47.8372   1
   4  -2   6 241.268 28.0455  10
  -4   2   6 266.424 30.5411   8
  -4   2   6 253.716 29.3315   9
   4   2  -5 261.662 46.3663   7
  -4   2   5 301.345 50.2243   1
  -4  -2  -5 214.340 34.7224   7
   4  -2   5 227.883 31.1277   4
  -4   2   4 3356.97 267.673   1
   4   2  -4 2951.83 259.743   7
  -4   2   3 3784.46 287.334   1
   4   2  -3 3259.55 283.120   7
  -4   2   2 1737.51 141.962   1
   4   2  -2 1657.62 143.996   7
   4   2  -1 2497.85 202.245   7
   4  -2   0 1404.35 112.522   6
   4   2   1 1601.05 122.426   6
   4  -2  -1 1490.56 119.784   6
   4   2   1 1494.50 122.508   1
   4   2   2 1282.80 109.859   1
   4   2   3 3519.27 287.624   1
   4   2   4 3808.70 318.146   1
   4   2   5 172.357 25.8491   4
   4   2   5 194.299 43.9586   1
   4   2   6 148.553 25.2663   4
   4   2   6 141.717 20.7535  10
  -4   2  -6 116.164 41.0620   7
   4   2   6 131.902 39.0378   1
   4   2   7 798.530 80.4604   4
   4   2   7 837.035 77.8120  10
  -4   2  -7 785.421 105.038   7
  -4  -2   7 904.427 76.4984   8
   4   2   7 984.528 112.877   1
   4   2   8 138.766 25.8660  10
  -4  -2   8 179.021 24.7363   8
  -4  -2   8 115.966 51.8649   1
   4   2   8 161.174 53.4937   1
   4   2   9 600.337 65.7914  10
  -4  -2   9 683.683 63.3218  10
  -4  -2  10 304.835 35.3003  10
  -4   2 -11 61.3625 29.1826   5
  -4  -2  11 23.5976 11.3016  10
   4   3 -11 98.0901 34.6702   5
  -4   3  11 95.6616 19.9171  10
  -4   3  10 365.596 42.2789  10
  -4   3   9 389.965 42.3182  10
   4  -3   9 299.351 38.5330  10
  -4   3   9 295.880 37.6203   9
  -4   3   9 315.171 38.3423   8
   4  -3   8 272.775 35.0157  10
  -4   3   8 262.241 35.4904  10
  -4   3   8 269.156 34.3323   9
  -4   3   8 276.371 35.1268   8
  -4   3   8 249.478 61.0364   1
   4  -3   8 262.252 73.6102   1
   4  -3   7 513.670 57.3928   4
  -4   3   7 474.276 77.5954   1
   4  -3   7 524.732 53.6674  10
  -4   3   7 568.939 54.1791   9
   4   3  -7 554.933 81.0982   7
  -4   3   7 580.142 55.3543   8
   4  -3   6 15.1207 16.8016   4
   4   3  -6 11.7543 27.3426   7
   4  -3   6 11.0510 11.3870  10
  -4   3   6 15.1687 12.4200   8
  -4   3   6 8.84912 12.1551   9
  -4   3   6 4.31647 27.1524   1
  -4   3   5 995.273 101.351   1
   4   3  -5 826.706 94.8710   7
   4  -3   5 832.049 77.0033   4
  -4   3   4 1797.44 157.812   1
   4   3  -4 1603.26 153.802   7
  -4   3   3 2502.15 199.230   1
   4   3  -3 2193.32 196.979   7
   4   3  -2 61.1256 21.6033   7
  -4   3   2 109.640 19.6092   1
  -4   3   1 5353.74 420.425   2
   4   3   0 5559.65 431.241   6
   4   3   0 5713.88 436.752   7
   4   3   1 4816.17 378.252   6
   4  -3  -1 4758.23 375.438   6
   4   3   1 5526.85 386.261   2
   4  -3  -2 50.3891 10.6908   6
   4   3   2 66.6311 16.7669   1
   4   3   3 1860.64 161.270   1
   4   3   4 1662.33 153.755   1
   4   3   5 1016.87 90.0312   4
   4   3   5 1152.32 115.392   1
   4   3   6 6.45852 14.8167   4
  -4   3  -6 21.2430 27.7448   7
   4   3   6 43.8307 28.6214   1
   4   3   7 426.521 50.8178   4
   4   3   7 480.560 49.3279  10
  -4  -3   7 478.729 46.3091   8
  -4   3  -7 437.146 78.1339   7
   4   3   7 493.423 78.7969   1
   4   3   8 305.667 39.1551  10
  -4  -3   8 342.753 37.9314  10
  -4  -3   8 252.876 69.2756   1
   4   3   8 308.733 68.5945   1
   4   3   9 365.568 47.3315  10
  -4  -3   9 456.120 45.2577  10
  -4  -3  10 302.889 34.4928  10
  -4   3 -11 95.7508 33.8728   5
   4   4 -11 210.090 45.7322   5
  -4   4  11 93.2966 20.2977  10
  -4   4   9 46.8384 18.5206   9
  -4   4   9 61.4302 19.9045   8
  -4   4   8 233.399 59.8458   1
   4  -4   8 291.267 36.9005  10
  -4   4   8 308.723 36.9519   9
  -4   4   8 292.258 36.7211   8
   4   4  -7 417.243 77.5047   7
  -4   4   7 512.857 80.2379   1
   4  -4   7 506.664 51.8127  10
  -4   4   7 571.766 53.6108   8
  -4   4   7 495.613 51.7833   9
   4  -4   6 75.2378 22.2680   4
   4   4  -6 90.8257 41.4767   7
   4  -4   6 93.5823 16.9356  10
  -4   4   6 83.6387 17.9991   9
  -4   4   6 80.0678 34.4316   1
  -4   4   5 897.146 98.8646   1
   4  -4   5 818.940 75.3952   4
   4   4  -5 812.872 94.7355   7
   4   4  -4 66.0077 29.3373   7
  -4   4   4 56.0787 26.9516   1
  -4   4   3 814.870 84.6729   1
   4   4  -3 887.107 86.5405   7
   4   4  -2 319.831 42.8350   7
  -4   4   1 66.7224 26.6238   2
   4   4   0 410.146 38.6163   6
   4   4   0 449.781 44.8776   7
   4   4   1 79.5342 16.4366   6
   4   4   1 86.6505 27.1473   2
   4  -4  -2 355.349 31.2668   6
   4  -4  -3 779.352 64.4115   6
   4   4   3 722.855 77.6555   1
   4   4   4 22.2262 24.5221   1
   4   4   5 776.729 73.2637   4
   4   4   5 1046.19 101.688   1
   4   4   6 40.1096 17.2380   4
   4   4   6 41.4008 14.7754  10
   4   4   6 63.8608 16.2605   9
  -4   4  -6 82.8982 40.7332   7
   4   4   6 58.6589 34.0578   1
  -4   4  -7 545.129 90.9423   7
  -4  -4   7 560.106 53.2754   8
   4   4   7 624.650 88.3010   1
  -4  -4   8 270.975 32.4961  10
   4   4   8 237.840 59.3784   1
   4   4   9 34.3631 18.3839  10
  -4  -4   9 62.0725 15.5658  10
  -4  -4  10 96.5986 17.2463  10
  -4   4 -11 163.962 40.7237   5
   4   5 -11 106.731 41.9857   5
   4   5 -10 29.3340 30.3965   5
  -4   5   9 228.553 31.7676  10
  -4   5   9 178.307 28.8784   9
  -4   5   9 220.959 30.6088   8
   4  -5   8 1022.61 97.5162  10
  -4   5   8 1057.89 97.1870   9
  -4   5   8 1226.60 100.438  10
   4   5  -8 1135.74 139.527   7
   4   5  -7 425.000 78.2795   7
  -4   5   7 302.382 67.2621   1
   4  -5   7 475.706 47.6765  10
  -4   5   7 463.131 47.8647   9
   4   5  -6 28.2540 36.7384   7
  -4   5   6 27.6981 31.1958   1
  -4   5   6 9.69334 14.2218   9
   4  -5   6 14.7080 18.1685   4
  -4   5   5 1091.99 117.427   1
   4   5  -5 1081.92 117.236   7
   4  -5   5 1060.59 94.4347   4
  -4   5   4 786.402 90.6409   1
   4   5  -4 897.127 94.2143   7
   4   5  -3 314.565 48.5552   7
  -4   5   2 1010.60 99.9044   2
  -4   5   1 1712.03 160.841   2
   4   5  -1 1628.52 141.548   7
   4   5   0 768.115 71.8587   7
   4   5   1 1957.34 154.087   6
   4   5   1 1702.61 175.285   2
   4   5   2 1045.17 101.359   2
   4   5   4 797.830 88.5383   1
   4   5   5 830.230 75.9965   4
  -4   5  -5 912.099 101.809   7
   4   5   5 886.317 101.031   1
   4   5   6 14.2010 17.1736   4
   4   5   6 14.2729 12.2232  10
   4   5   6 11.0328 13.0091   9
  -4   5  -6 14.8063 33.8970   7
   4   5   6 13.9022 29.1523   1
   4   5   7 398.742 44.1622   9
   4   5   7 469.711 47.4762  10
  -4   5  -7 321.284 74.1516   7
   4   5   7 473.183 77.8271   1
  -4   5  -8 1188.78 149.405   7
  -4  -5   8 1070.14 94.2586  10
  -4  -5   9 223.959 28.6533  10
  -4   5 -10 24.0677 30.8219   5
  -4  -5  10 27.0583 11.7337  10
  -4   5 -11 90.1900 43.5883   5
   4   6 -10 3.02339 32.7182   5
  -4   6  10 9.34837 12.9817  10
   4   6  -9 232.811 47.7816   5
  -4   6   9 175.977 28.1552  10
  -4   6   9 150.237 28.0830   9
  -4   6   8 763.362 72.5670   9
  -4   6   8 731.941 71.9206  10
   4   6  -8 816.189 117.826   7
  -4   6   8 764.720 119.049   2
   4   6  -7 622.475 99.8081   7
  -4   6   7 650.946 63.0073   8
  -4   6   7 630.919 62.8197   9
  -4   6   6 1248.73 102.965   8
   4   6  -6 1191.74 135.330   7
  -4   6   6 1002.61 99.5201   9
   4  -6   6 1374.20 107.081   4
   4   6  -5 736.179 90.2240   7
   4  -6   5 659.026 65.6470   4
   4   6  -4 1811.46 169.776   7
  -4   6   3 3410.74 283.719   2
   4   6  -3 3222.76 277.421   7
  -4   6   2 1435.07 139.793   2
  -4   6   1 599.344 92.7016   2
   4   6  -1 645.720 66.0891   7
   4   6   0 96.8923 23.9812   7
   4   6   1 591.383 54.1290   6
   4   6   1 403.765 86.1097   2
   4   6   2 1458.35 140.130   2
   4   6   3 2933.93 254.325   2
  -4   6  -5 765.266 89.4131   7
   4   6   5 596.341 58.5686   4
   4   6   6 1130.35 103.037   4
   4   6   6 1206.75 103.291  10
   4   6   6 1207.87 101.302   9
  -4   6  -6 1266.55 139.853   7
   4   6   7 584.498 60.1169  10
   4   6   7 564.223 56.3656   9
  -4   6  -7 681.703 102.889   7
  -4  -6   8 915.419 77.0016  10
   4   6   8 741.760 80.8611  10
  -4   6  -8 889.823 130.922   7
   4   6   8 1052.87 136.010   2
  -4  -6   9 89.8429 17.4155  10
  -4   6  -9 127.174 42.6757   5
  -4   6 -10 12.1868 30.9917   5
  -4   7  10 362.351 40.4528  10
   4   7 -10 352.508 64.3735   5
  -4   7   9 449.053 47.9296  10
  -4   7   9 376.862 45.8304   9
   4   7  -9 516.594 70.8263   5
   4   7  -8 1018.57 99.3778   5
   4   7  -8 609.796 110.597   7
  -4   7   8 740.445 120.228   2
  -4   7   8 785.751 72.2963  10
  -4   7   8 721.633 71.4669   9
  -4   7   8 680.669 70.0055   8
   4   7  -7 353.024 77.4893   7
  -4   7   7 275.354 77.7398   2
  -4   7   7 360.881 39.3859  10
  -4   7   7 300.847 38.4803   8
  -4   7   7 327.043 40.0054   9
   4   7  -6 229.743 58.2650   7
  -4   7   6 323.011 34.9790   8
  -4   7   6 200.129 30.5504   9
  -4   7   6 219.810 63.2884   2
  -4   7   5 846.575 109.420   2
  -4   7   5 794.668 70.6625   8
   4   7  -5 681.122 95.8040   7
   4  -7   5 829.313 76.6265   4
  -4   7   4 1532.45 156.310   2
   4   7  -4 1443.85 146.975   7
  -4   7   3 1570.78 157.714   2
  -4   7   2 2405.48 189.010   2
  -4   7   2 1673.70 138.636   7
  -4   7   1 1548.47 185.458   2
   4   7  -1 1741.14 149.476   7
   4   7   0 82.4369 17.0055   6
   4   7   0 61.7346 23.5279   7
   4   7   1 2308.18 179.260   6
   4   7   1 1703.66 218.278   2
   4   7   2 2777.85 253.251   2
   4   7   3 1359.43 140.948   2
   4   7   4 1492.69 154.937   2
   4   7   5 588.583 58.1476   4
  -4   7  -5 665.726 88.1751   7
   4   7   5 781.942 99.5193   2
   4   7   6 282.963 71.4667   2
  -4   7  -6 266.127 65.3242   7
   4   7   6 299.106 37.6141  10
   4   7   6 378.782 37.5382   9
   4   7   7 479.975 93.5192   2
   4   7   7 379.994 41.3425   9
   4   7   7 352.869 43.8274  10
  -4   7  -7 361.157 78.6082   7
  -4   7  -8 507.903 100.717   7
   4   7   8 497.064 59.5425  10
   4   7   8 579.623 55.9861   9
  -4   7  -8 704.575 86.5867   5
   4   7   8 627.225 107.501   2
  -4   7  -9 335.520 63.6591   5
  -4   7 -10 286.880 59.6940   5
  -4   8  10 625.241 48.4153  10
   4   8 -10 60.7521 60.1300   5
  -4   8   9 889.720 78.1698  10
  -4   8   9 765.182 76.6233   9
   4   8  -9 870.864 107.420   5
   4   8  -8 1196.91 121.048   5
  -4   8   8 928.786 84.6024   9
  -4   8   8 881.783 82.9095  10
   4   8  -8 1040.19 137.389   7
  -4   8   8 842.446 81.6612   8
  -4   8   8 734.962 132.480   2
  -4   8   7 1996.28 178.478  10
   4   8  -7 2280.12 230.602   7
  -4   8   7 2214.83 179.977   8
  -4   8   7 2060.01 239.196   2
  -4   8   6 2805.22 237.866  10
   4   8  -6 2949.89 281.406   7
  -4   8   6 2809.74 238.870   8
  -4   8   6 3225.13 303.405   2
  -4   8   5 752.955 111.321   2
  -4   8   5 743.452 68.9733   8
   4   8  -5 690.650 97.6145   7
   4   8  -5 976.650 97.4110   5
  -4   8   4 1031.50 126.492   2
   4   8  -4 1005.42 114.423   7
  -4   8   3 1187.54 137.820   2
  -4   8   2 2404.45 274.735   2
   4   8  -2 3308.83 256.211   7
  -4   8   1 3452.11 353.281   2
   4   8  -1 3905.56 311.303   7
   4   8   0 3013.47 236.492   6
   4   8   0 2934.07 246.185   7
   4   8   1 4263.88 318.350   6
   4   8   1 2854.56 362.327   2
   4   8   2 2664.47 261.294   2
   4   8   3 999.070 120.630   2
  -4   8  -4 835.025 101.878   7
   4   8   4 966.842 117.017   2
  -4   8  -5 595.522 78.2944   5
   4   8   5 595.605 57.0745  10
   4   8   5 555.594 53.5151   9
  -4   8  -5 592.980 85.6017   7
   4   8   5 704.244 99.1275   2
  -4   8  -6 2295.93 223.685   5
   4   8   6 2464.76 194.503   9
   4   8   6 2279.40 197.722  10
  -4   8  -6 2600.97 242.075   7
   4   8   6 2818.87 261.500   2
  -4   8  -7 1716.97 178.442   5
   4   8   7 1654.48 142.271   9
   4   8   7 1693.56 147.820  10
  -4   8  -7 1986.14 197.509   7
   4   8   7 2025.52 213.948   2
  -4   8  -8 760.552 109.967   5
   4   8   8 910.590 79.7802   9
  -4   8  -8 879.302 131.103   7
   4   8   8 863.231 138.137   2
  -4   8  -9 692.119 98.2082   5
  -4   8 -10 19.0965 42.4078   5
   4   9 -10 208.206 58.6879   5
  -4   9   9 524.173 51.6850  10
  -4   9   9 530.531 53.2891   9
   4   9  -8 37.3526 55.8344   5
  -4   9   8 11.0401 14.9538  10
  -4   9   8 9.03615 13.8087   8
   4   9  -7 145.252 61.0703   5
   4   9  -7 104.076 55.0853   7
  -4   9   7 70.0604 60.7344   2
  -4   9   7 71.5748 19.0302  10
  -4   9   7 72.4073 19.5303   8
   4   9  -6 286.690 70.6263   5
   4   9  -6 235.752 66.4118   7
  -4   9   6 260.340 31.0606  10
  -4   9   6 256.329 32.5853   8
  -4   9   6 170.637 75.5070   2
   4   9  -5 3664.55 275.280   5
  -4   9   5 2774.14 229.429  10
  -4   9   5 2943.79 231.308   8
   4   9  -5 2886.02 269.956   7
  -4   9   5 2523.13 287.455   2
  -4   9   4 3234.45 354.000   2
   4   9  -4 4321.19 341.873   5
  -4   9   3 1700.84 214.591   2
   4   9  -3 2381.21 199.441   7
  -4   9   2 498.500 104.745   2
   4   9  -2 713.672 81.0621   7
   4   9  -1 3141.06 238.009   7
  -4   9   1 2584.81 221.570   7
   4   9   0 86.0983 18.3771   6
   4   9   0 83.9130 27.4401   7
   4   9   1 3352.94 263.702   6
   4   9   2 390.597 87.4988   2
  -4   9  -3 2357.67 202.082   7
   4   9   3 1828.50 219.307   2
  -4   9  -4 3072.21 281.505   5
   4   9   4 3253.11 307.466   2
  -4   9  -5 2545.43 229.999   5
   4   9   5 2411.99 194.971  10
  -4   9  -5 2482.97 231.777   7
   4   9   5 2293.16 190.804   9
   4   9   5 2769.66 262.326   2
  -4   9  -6 237.825 70.5874   5
   4   9   6 226.683 73.1529   2
   4   9   6 209.917 27.1262   9
   4   9   6 168.750 28.8986  10
  -4   9  -6 247.578 64.9458   7
  -4   9  -7 88.0118 50.5299   7
  -4   9  -7 103.354 63.6756   5
   4   9   7 87.4329 20.3692   9
   4   9   7 79.3861 63.9277   2
  -4   9  -8 39.7593 56.5436   5
  -4   9  -9 9.99976 56.8426   5
  -4   9 -10 128.149 52.2451   5
   4  10 -10 71.3782 36.8873   5
   4  10  -9 202.525 70.0727   5
  -4  10   8 714.822 61.3325  10
  -4  10   8 745.570 61.2026   8
   4  10  -7 489.095 106.347   5
   4  10  -7 531.833 99.3212   7
  -4  10   7 395.915 115.251   2
  -4  10   7 532.300 53.9581  10
  -4  10   7 546.365 54.5235   8
  -4  10   7 577.787 58.2698   9
   4  10  -6 186.134 79.8986   5
   4  10  -6 221.364 63.6579   7
  -4  10   6 227.423 29.6771  10
  -4  10   6 262.992 31.0664   8
  -4  10   6 216.067 33.6384   9
  -4  10   6 217.792 90.0290   2
  -4  10   5 1197.84 186.953   2
   4  10  -5 1429.48 159.651   7
  -4  10   5 1494.72 120.832   8
   4  10  -5 1159.25 164.337   5
   4  10  -4 135.607 69.5379   5
  -4  10   4 329.751 93.1388   2
   4  10  -3 45.1187 33.2390   7
  -4  10   3-9.47116 52.2735   2
  -4  10   2 446.593 101.503   2
   4  10  -2 610.611 76.5748   7
  -4  10   1 2988.71 247.720   7
   4  10  -1 3262.31 263.505   7
   4  10   0 2584.21 201.057   6
   4  10   0 2419.12 213.250   7
  -4  10   0 2393.03 210.434   7
  -4  10  -1 3586.06 300.360   7
  -4  10  -2 734.974 79.2777   7
   4  10   2 348.679 94.4528   2
   4  10   3 9.20449 54.4323   2
  -4  10  -3 4.04262 27.7596   7
  -4  10  -3 20.4548 56.7504   5
   4  10   4 326.644 87.7728   2
  -4  10  -4 297.558 77.0061   5
   4  10   5 868.546 143.815   2
   4  10   5 972.896 80.2537   9
  -4  10  -5 869.643 118.554   7
  -4  10  -5 635.055 124.449   5
   4  10   6 122.375 74.6337   2
  -4  10  -6 94.4704 80.3497   5
  -4  10  -6 137.204 53.2314   7
   4  10   6 145.058 22.8785   9
  -4  10  -7 479.181 93.7798   7
   4  10   7 544.628 125.155   2
   4  10   7 514.632 49.8583   9
  -4  10  -7 281.235 98.9727   5
  -4  10  -8 13.6145 63.9305   5
  -4  10  -9 64.6125 61.7625   5
  -4  10 -10 117.488 40.9843   5
   4  11  -9 80.8645 51.7345   5
  -4  11   8 237.633 32.8864   9
   4  11  -8 41.1889 73.5790   5
  -4  11   7 316.154 115.337   2
  -4  11   7 345.667 39.1921   8
  -4  11   7 440.205 45.8224   9
   4  11  -7 331.210 79.5675   7
  -4  11   6 170.788 98.2353   2
   4  11  -6 169.605 98.5132   5
  -4  11   6 289.395 33.0461   8
  -4  11   6 265.903 36.8395   9
   4  11  -6 223.445 67.2610   7
  -4  11   5 322.897 120.607   2
   4  11  -5 321.367 102.768   5
  -4  11   5 511.037 48.6827   8
  -4  11   4 538.645 135.031   2
  -4  11   4 684.379 73.3403  12
   4  11  -3 622.772 72.4258  12
  -4  11   3 574.353 67.9971  12
  -4  11   3 828.097 75.3645   5
   4  11  -3 762.420 92.9713   7
   4  11  -3 559.211 101.006   5
   4  11  -2 348.439 57.3229   7
  -4  11   2 352.980 45.3003   5
   4  11  -2 249.584 61.2391   5
   4  11  -1 75.1940 31.2261   7
  -4  11   0 51.3140 23.2956   7
   4  11   0 59.6062 25.3211   7
   4  11   0 51.2045 16.2887   6
  -4  11  -1 53.6763 27.5550   7
  -4  11  -2 247.833 55.4724   5
   4  11   2 215.158 37.4822   5
  -4  11  -2 168.242 45.5064   7
   4  11   3 541.651 69.3257  12
  -4  11  -3 623.488 74.0276  12
   4  11   3 739.452 74.2920   5
  -4  11  -3 675.502 98.5889   5
  -4  11  -3 830.346 94.0501   7
   4  11   4 445.507 133.387   2
  -4  11  -4 101.621 92.8321   5
  -4  11  -4 920.356 107.271   7
   4  11   4 984.212 67.7900   9
   4  11   4 595.383 77.2187  12
   4  11   5 322.931 107.293   2
   4  11   5 441.201 40.7992   9
  -4  11  -6 216.244 65.1173   7
   4  11   6 192.830 89.9539   2
   4  11   6 242.874 29.7915   9
  -4  11  -6 106.876 93.5199   5
  -4  11  -7 277.763 70.4766   7
   4  11   7 402.635 39.5941   9
   4  11   7 183.886 100.704   2
  -4  11  -7 141.422 96.2451   5
  -4  11  -8 58.5840 75.1349   5
  -4  11  -9 46.1218 49.3740   5
   4  12  -9 20.1496 39.0339   5
  -4  12   9 55.7915 16.3858   9
   4  12  -8 65.1995 62.0081   5
  -4  12   8 146.467 25.9928   9
  -4  12   7 138.476 27.5647   9
  -4  12   6 33.5608 90.6467   2
  -4  12   6 130.592 20.8979   8
  -4  12   6 115.076 26.2425   9
   4  12  -6 83.1277 58.0182   7
  -4  12   5 635.279 161.614   2
   4  12  -5 551.151 101.967   7
  -4  12   5 816.040 64.4119   8
  -4  12   4 55.4454 34.1437  12
   4  12  -4 87.3801 50.4939   7
   4  12  -4 75.2094 62.1247   5
  -4  12   4 14.1235 74.0294   2
   4  12  -3 253.792 53.0182  12
  -4  12   3 292.377 50.6664  12
  -4  12   3 488.952 55.8061   5
   4  12  -3 369.854 71.1909   7
   4  12  -3 394.617 76.3071   5
  -4  12   3 204.467 94.9503   2
   4  12  -2 864.728 94.7209  12
  -4  12   2 692.025 86.1526  12
  -4  12   2 1190.42 94.6502   5
   4  12  -2 808.724 103.932   5
   4  12  -2 1102.03 113.460   7
   4  12  -1 248.515 49.9767   5
   4  12  -1 220.365 49.4872  12
  -4  12   1 190.413 39.3125  12
   4  12  -1 331.438 55.4202   7
  -4  12   1 317.837 42.7711   5
   4  12  -1 275.562 35.8296   6
   4  12   0 307.082 55.3716  12
  -4  12   0 310.406 46.8443  12
  -4  12   0 380.660 49.1921   5
   4  12   0 337.998 50.7802   5
  -4  12   0 357.869 51.2053   7
   4  12   1 306.313 53.6581  12
  -4  12  -1 319.290 47.6135  12
   4  12   1 343.239 47.3648   5
  -4  12  -1 331.769 51.2620   5
  -4  12  -1 330.109 54.7957   7
   4  12   2 863.388 89.9714  12
  -4  12  -2 812.133 88.1454  12
   4  12   2 837.953 87.4247   5
  -4  12  -2 892.151 99.9704   5
  -4  12  -2 945.935 106.965   7
   4  12   3 234.495 90.8386   2
   4  12   3 224.386 45.9452  12
  -4  12  -3 327.219 54.7655  12
   4  12   3 359.903 50.3508   5
  -4  12  -3 294.439 67.5041   5
  -4  12  -3 364.312 65.1188   7
   4  12   4 79.1122 34.0438  12
  -4  12  -4 185.038 74.1761   5
  -4  12  -4 105.758 45.1221   7
   4  12   4 108.927 89.1603   2
  -4  12  -5 438.711 86.5971   7
   4  12   5 594.083 53.3593   9
   4  12   5 335.405 134.362   2
   4  12   6 195.593 25.5801   9
   4  12   6 227.990 117.873   2
   4  12   7 138.770 22.6063   9
  -4  12  -8 112.018 68.3001   5
  -4  12  -9 41.0253 39.6663   5
   4  13  -9 65.7454 30.5176   5
   4  13  -8 196.344 61.6654   5
  -4  13   8 243.315 30.9853   9
  -4  13   7 446.644 49.0143   9
   4  13  -7 469.380 100.593   5
   4  13  -6 952.270 151.675   5
  -4  13   6 1111.94 95.1393   9
   4  13  -5 447.357 90.8544   7
   4  13  -5 533.807 105.301   5
  -4  13   5 252.014 121.625   2
   4  13  -4 417.442 63.0914  12
   4  13  -4 550.664 90.0133   7
   4  13  -4 412.149 88.6694   5
   4  13  -3 104.697 51.3630   5
  -4  13   3 149.803 33.8805   5
  -4  13   3 88.2780 38.1947  12
   4  13  -3 45.3872 38.5521  12
   4  13  -3 88.5579 46.3859   7
   4  13  -2 403.183 66.2910  12
  -4  13   2 378.668 59.1888  12
  -4  13   2 565.012 60.4757   5
   4  13  -2 433.635 68.4290   5
   4  13  -2 504.579 76.8878   7
   4  13  -1 352.142 61.8622  12
  -4  13   1 333.533 53.5208  12
   4  13  -1 342.288 56.1885   5
  -4  13   1 503.809 54.7363   5
   4  13  -1 430.206 68.1729   7
   4  13   0 304.520 49.8231   5
   4  13   0 378.353 58.8976  12
  -4  13   0 377.436 51.6048  12
  -4  13   0 329.815 49.2516   5
   4  13   1 398.329 65.6404  12
  -4  13  -1 387.893 59.1249  12
  -4  13  -1 552.716 64.7906   5
   4  13   1 507.779 60.9455   5
  -4  13  -1 518.028 71.4441   7
   4  13   2 276.857 53.0953  12
  -4  13  -2 353.467 55.7131  12
   4  13   2 363.903 51.1915   5
  -4  13  -2 351.061 57.6134   5
  -4  13  -2 338.630 62.9481   7
  -4  13  -3 142.436 52.4869   5
   4  13   3 127.896 37.5857   5
  -4  13  -3 132.593 49.2563   7
   4  13   3 95.5593 41.3339  12
  -4  13  -3 76.8569 45.1541  12
   4  13   4 330.310 117.915   2
   4  13   4 334.188 57.5426  12
  -4  13  -4 379.119 81.9119   5
  -4  13  -4 393.642 75.6307   7
  -4  13  -5 382.453 78.7590   7
   4  13   5 377.475 38.8271   9
  -4  13  -5 518.847 106.529   5
   4  13   5 209.538 117.722   2
   4  13   6 1053.18 87.0332   9
  -4  13  -6 1123.32 159.569   5
  -4  13  -7 402.047 98.5177   5
  -4  13  -8 320.224 70.5613   5
  -4  13  -9 75.3151 28.7158   5
  -4  14   8 41.2548 15.2708   9
   4  14  -8 18.8029 34.6793   5
  -4  14   7 146.073 24.9279   9
   4  14  -7 148.506 60.8268   5
  -4  14   6 145.416 26.4971   9
   4  14  -6 123.018 67.8534   5
   4  14  -5 1224.16 155.619   7
   4  14  -5 1261.65 155.696   5
   4  14  -4 1883.40 171.448  12
   4  14  -4 1778.85 193.221   5
   4  14  -4 1969.14 205.839   7
   4  14  -3 98.7595 46.9499   5
  -4  14   3 144.862 39.3176   5
   4  14  -3 162.781 48.1021  12
  -4  14   3 144.407 47.4661  12
   4  14  -3 242.145 61.5551   7
  -4  14   2 201.081 37.7919   5
   4  14  -2 164.836 43.2935   5
  -4  14   2 90.7144 41.3442  12
   4  14  -2 104.310 46.6595  12
   4  14  -2 126.874 48.4605   7
  -4  14   1 131.684 32.8075   5
   4  14  -1 167.921 39.0117   5
  -4  14   1 141.661 44.6889  12
   4  14  -1 88.3760 48.2351  12
   4  14  -1 112.548 43.8520   7
  -4  14   0 182.080 38.1812   5
   4  14   0 147.980 38.2158   5
   4  14   0 151.477 49.6718  12
  -4  14   0 160.564 43.7207  12
  -4  14  -1 231.317 42.4347   5
   4  14   1 172.609 38.9428   5
  -4  14  -1 149.697 45.9289  12
   4  14   1 162.496 52.1435  12
  -4  14  -1 148.238 42.3630   7
  -4  14  -2 64.9450 35.5240   5
   4  14   2 64.9402 29.7431   5
   4  14   2 70.1557 43.8658  12
  -4  14  -2 108.643 42.2894  12
  -4  14  -2 48.4263 38.1271   7
  -4  14  -3 163.325 48.6940   5
   4  14   3 166.625 41.6094   5
   4  14   3 129.961 44.9859  12
  -4  14  -3 150.475 51.2163  12
  -4  14  -3 173.313 52.4802   7
  -4  14  -4 1883.60 192.949   5
  -4  14  -4 1930.01 199.970   7
   4  14   4 1821.13 168.878  12
  -4  14  -5 1097.86 146.723   7
  -4  14  -5 1330.46 155.088   5
  -4  14  -6 185.717 74.1525   5
  -4  14  -7 161.683 60.8878   5
  -4  14  -8 41.8878 36.7664   5
   4  15  -8 295.095 44.0495   5
   4  15  -7 479.741 75.9675   5
  -4  15   7 599.584 54.8294   9
   4  15  -6 32.7053 46.8120   5
  -4  15   6 84.9228 20.5754   9
   4  15  -5 343.697 76.2909   5
  -4  15   5 399.842 43.3822   9
   4  15  -4 626.416 90.8336   5
   4  15  -4 571.717 79.6461  12
   4  15  -4 508.295 101.199   7
  -4  15   3 227.713 45.3670   5
   4  15  -3 191.426 49.9638   5
   4  15  -3 173.301 51.4903  12
  -4  15   3 111.792 49.4392  12
   4  15  -3 151.322 61.6166   7
  -4  15   2 855.103 101.224  12
   4  15  -2 774.701 104.613  12
  -4  15   2 1078.20 97.9153   5
   4  15  -2 801.837 98.9333   5
   4  15  -2 1023.50 121.671   7
   4  15  -1 625.055 84.2603  12
  -4  15   1 570.388 66.4905   5
   4  15  -1 484.285 68.9535   5
   4  15   0 547.850 84.6426  12
  -4  15   0 583.452 75.5148  12
  -4  15   0 541.499 65.1380   5
   4  15   0 447.187 64.2185   5
  -4  15  -1 604.469 79.5252  12
  -4  15  -1 602.483 72.7681   5
   4  15   1 618.575 72.9038   5
  -4  15  -2 785.056 97.9214  12
   4  15   2 761.430 96.5273  12
   4  15   2 876.329 91.6499   5
  -4  15  -2 862.531 94.6501   5
  -4  15  -2 832.218 110.016   7
   4  15   3 229.614 47.0458   5
  -4  15  -3 222.245 50.3388   5
   4  15   3 160.211 49.9954  12
  -4  15  -3 200.470 57.1274  12
  -4  15  -3 114.428 49.8704   7
  -4  15  -4 648.124 89.9304   5
   4  15   4 595.627 79.2397  12
  -4  15  -4 559.994 99.0464   7
  -4  15  -5 328.415 72.4700   5
  -4  15  -6 82.1077 53.6291   5
  -4  15  -7 547.660 78.9022   5
  -4  15  -8 259.148 41.6130   5
   4  16  -7 116.918 35.1565   5
   4  16  -6 372.374 62.5389   5
  -4  16   5 1702.16 138.690   9
   4  16  -5 1553.55 164.812   5
   4  16  -4 1407.59 154.154   5
   4  16  -4 1660.99 149.075  12
   4  16  -3 1240.84 125.909  12
   4  16  -3 1055.46 120.381   5
  -4  16   3 1294.41 120.134   5
   4  16  -3 990.414 142.991   7
  -4  16   2 210.539 39.9916   5
   4  16  -2 81.2651 38.4843   5
  -4  16   2 141.247 52.0493  12
   4  16  -2 130.709 57.7933  12
   4  16  -1 1218.30 129.302  12
   4  16  -1 1042.62 112.338   5
  -4  16   1 1168.47 111.810   5
  -4  16   0 991.369 113.621  12
   4  16   0 1191.77 124.891  12
  -4  16   0 934.702 99.2501   5
   4  16   0 982.781 102.329   5
  -4  16  -1 1072.69 116.733  12
  -4  16  -1 893.878 98.9939   5
   4  16   1 1017.49 102.351   5
  -4  16  -2 68.3186 33.5575   5
   4  16   2 97.4452 33.3839   5
   4  16   2 118.911 53.1568  12
  -4  16  -2 140.216 53.3820  12
   4  16   3 1094.14 115.227  12
   4  16   3 1016.41 110.293   5
  -4  16  -3 1051.63 111.618   5
  -4  16  -3 943.824 127.830   7
  -4  16  -4 1350.58 146.878   5
   4  16   4 1587.33 145.455  12
  -4  16  -5 1572.89 159.217   5
  -4  16  -6 286.096 57.8747   5
  -4  16  -7 127.036 36.5980   5
   4  17  -7 9.99276 19.8180   5
   4  17  -6 541.052 66.8836   5
   4  17  -5 660.613 80.8009   5
   4  17  -4 747.740 88.3567  12
   4  17  -4 697.422 86.6999   5
   4  17  -3 1527.94 142.800  12
   4  17  -3 1179.96 133.358   5
  -4  17   3 1506.39 136.890   5
  -4  17   2 1019.31 118.296  12
   4  17  -2 1185.63 125.303  12
   4  17  -2 898.105 106.400   5
  -4  17   2 1229.97 110.637   5
   4  17  -1 1474.29 140.656  12
   4  17  -1 1138.03 117.261   5
  -4  17   1 1143.24 114.658   5
  -4  17   0 488.396 85.7164  12
   4  17   0 592.286 95.8077  12
   4  17   0 559.925 69.4381   5
  -4  17   0 604.771 68.8953   5
  -4  17  -1 1162.11 128.821  12
   4  17   1 1107.79 113.209   5
  -4  17  -1 1219.48 114.522   5
   4  17   2 1305.67 133.121  12
  -4  17  -2 1002.64 126.953  12
  -4  17  -2 1196.86 116.687   5
   4  17   2 1182.80 117.550   5
   4  17   3 1731.27 151.966  12
  -4  17  -3 1362.64 142.053   5
   4  17   3 1467.23 144.929   5
  -4  17  -4 728.659 87.0095   5
  -4  17  -5 652.174 79.6513   5
  -4  17  -6 518.111 64.9171   5
  -4  17  -7 16.8492 20.1828   5
   4  18  -6 800.953 79.0703   5
   4  18  -5 650.847 74.6495   5
   4  18  -4 157.641 37.8424   5
   4  18  -4 98.0509 42.5692  12
   4  18  -3 346.149 66.5745  12
   4  18  -3 310.935 51.8268   5
   4  18  -2 162.603 38.4437   5
  -4  18   2 275.528 43.8874   5
   4  18  -2 180.221 59.5455  12
   4  18  -1 884.053 106.123  12
  -4  18   1 706.867 80.1737   5
   4  18  -1 751.422 82.0176   5
   4  18   0 1245.10 132.860  12
  -4  18   0 1062.17 127.632  12
  -4  18   0 1033.59 105.488   5
   4  18   0 1087.48 108.141   5
  -4  18  -1 655.541 98.4192  12
   4  18   1 850.203 85.2878   5
  -4  18  -1 724.360 80.0189   5
  -4  18  -2 234.206 41.7507   5
   4  18   2 260.606 45.6431   5
   4  18   2 192.252 60.2912  12
   4  18   3 394.031 71.6609  12
  -4  18  -3 453.211 58.9962   5
  -4  18  -4 145.092 38.0538   5
  -4  18  -5 646.128 72.9606   5
  -4  18  -6 859.939 84.0170   5
   4  19  -5 177.312 31.7431   5
   4  19  -4 153.358 33.3838   5
   4  19  -3 404.134 64.9174  12
   4  19  -3 293.091 46.0332   5
   4  19  -2 722.541 92.5251  12
  -4  19   2 625.629 70.5381   5
   4  19  -2 578.820 68.9415   5
  -4  19   1 181.745 36.8773   5
   4  19  -1 157.021 35.6859   5
   4  19  -1 168.002 65.0598  12
   4  19   0 476.794 86.0920  12
  -4  19   0 393.924 52.0732   5
   4  19   0 403.579 53.7851   5
  -4  19  -1 104.771 30.3890   5
   4  19   1 126.941 34.1882   5
   4  19   2 762.195 91.9751  12
  -4  19  -2 633.616 72.5381   5
   4  19   2 669.857 76.1664   5
   4  19   3 404.552 67.9198  12
  -4  19  -3 381.114 51.3814   5
  -4  19  -4 249.522 39.4991   5
  -4  19  -5 196.883 33.4532   5
   4  20  -4 24.6106 17.6870   5
   4  20  -3 59.9441 23.6695   5
   4  20  -3 36.0007 40.8854  12
   4  20  -2 578.366 83.1156  12
   4  20  -2 533.558 60.9952   5
   4  20  -1 1060.16 112.721  12
  -4  20   1 891.848 86.0507   5
   4  20  -1 758.885 83.0261   5
   4  20   0 85.0657 28.2246   5
  -4  20   0 139.276 29.7408   5
   4  20   0 161.758 61.6362  12
   4  20   1 672.705 75.0638   5
  -4  20  -1 760.069 74.6984   5
   4  20   2 623.757 85.6416  12
  -4  20  -2 596.138 64.8308   5
  -4  20  -3 66.0496 25.1284   5
  -4  20  -4 46.0861 20.6985   5
   4  21  -3 142.890 26.1130   5
   4  21  -2 62.2058 21.4496   5
   4  21  -2 68.6712 43.3776  12
   4  21  -1 96.9596 24.9297   5
  -4  21   1 71.6046 23.7717   5
   4  21  -1 57.4119 48.2725  12
   4  21   0 51.5361 21.9761   5
  -4  21   0 48.0028 22.3432   5
   4  21   0 96.9223 52.1753  12
   4  21   1 47.7642 22.6714   5
  -4  21  -1 50.9192 21.6830   5
  -4  21  -2 59.7137 20.6876   5
   4  21   2 68.7390 44.3750  12
  -4  21  -3 130.350 24.6298   5
   4  22  -1 41.8911 17.9355   5
  -4  22   0 10.1846 15.7103   5
   4  22   0 6.52998 16.5132   5
  -4  22  -1 43.6815 17.3131   5
   5   0   0 0.56784 10.3140   6
   5   0   1 2085.12 170.270   6
   5   0  -1 2177.64 168.404   6
   5   0  -2 4546.25 360.086   7
   5   0  -3 9050.07 705.233   7
   5   0  -4 11307.9 880.364   7
   5   0   5 11294.7 893.230   4
   5   0  -5 12414.5 908.941   7
   5   0   6 2436.27 220.342   4
   5   0   6 2592.37 217.115  10
  -5   0   6 3122.99 219.053   8
   5   0  -6 2523.65 231.424   7
  -5   0  -6 2629.75 238.099   7
  -5   0   6 2999.64 253.120   1
   5   0   6 3110.50 257.511   1
   5   0   7 63.4794 24.6936   4
   5   0   7 45.4525 17.6984  10
  -5   0   7 66.0102 16.8806   8
  -5   0   7 41.3885 15.8777   9
   5   0   7 27.0812 31.5752   1
  -5   0   7 84.6364 34.9525   1
   5   0   8 1588.75 138.737  10
  -5   0   8 1519.54 134.570   9
  -5   0   8 1689.88 136.522   8
   5   0   8 1835.05 182.889   1
  -5   0   8 1785.60 174.877   1
   5   0   9-1.63544 16.3922  10
  -5   0   9 2.93438 14.9288  10
  -5   0   9 20.7659 14.2205   8
  -5   0  10 220.490 30.0065  10
  -5   0  11 485.892 47.6162  10
  -5   1  11 160.974 23.8164  10
  -5   1  10 981.359 88.7083  10
  -5   1   9 2509.57 190.184  10
   5  -1   9 2055.52 188.634  10
  -5   1   9 2303.66 186.630   8
  -5   1   8 1686.73 149.504   9
   5  -1   8 1825.71 153.692  10
  -5   1   8 1983.67 152.357   8
   5  -1   8 1777.58 193.006   1
  -5   1   8 1761.07 185.316   1
   5  -1   7 450.095 54.5627   4
   5  -1   7 500.508 83.0171   1
  -5   1   7 513.057 76.4095   1
   5  -1   7 561.425 52.4729  10
  -5   1   7 446.056 48.9681   9
  -5   1   7 562.530 51.9867   8
   5  -1   6 82.5946 23.3043   4
   5   1  -6 37.7924 28.2225   7
   5  -1   6 76.6381 16.0050  10
  -5   1   6 100.654 18.6780   8
  -5   1   6 94.6749 17.5608   9
  -5   1   6 131.464 37.9073   1
  -5   1   5 1774.27 155.191   1
   5   1  -5 1658.57 146.417   7
   5  -1   5 1437.81 127.866   4
  -5   1   4 2447.42 200.628   1
   5   1  -4 2070.74 191.684   7
   5   1  -3 1325.15 120.653   7
  -5   1   2 786.150 71.2684   1
   5   1  -2 718.466 73.2957   7
  -5   1   1 21341.2 1625.89   1
   5   1   0 4473.81 342.188   6
   5  -1   0 4378.26 342.489   6
   5  -1  -1 19321.9 1490.46   6
   5   1   1 19792.4 1490.45   1
   5  -1  -3 1526.41 132.613   7
   5  -1  -4 2125.38 181.165   7
   5  -1  -5 1372.28 126.979   7
   5   1   5 1479.67 144.552   1
   5   1   6 58.0848 14.7169  10
  -5   1  -6 25.5282 26.1811   7
  -5  -1   6 65.2298 16.1408   8
   5   1   6 53.7985 34.3418   1
   5   1   7 461.417 51.2082  10
  -5  -1   7 523.075 50.1300   9
  -5  -1   7 519.535 50.4911   8
  -5  -1   7 626.224 85.8129   1
   5   1   7 477.791 78.2188   1
   5   1   8 1806.98 155.381  10
  -5  -1   8 1833.53 151.825   8
  -5  -1   8 1910.26 191.798   1
   5   1   8 1881.80 193.800   1
  -5  -1   9 2597.12 196.736  10
   5   1   9 2163.77 196.949  10
  -5  -1  10 1043.54 92.2065  10
  -5  -1  11 106.069 18.3375  10
   5   2 -11 31.2346 29.0496   5
  -5   2  11 24.9479 13.1160  10
  -5   2  10 323.478 39.1845  10
  -5   2   9 149.850 26.5964  10
  -5   2   9 152.143 25.7109   8
  -5   2   8 786.551 78.4088   9
   5  -2   8 864.804 82.3968  10
  -5   2   8 1024.42 82.3053   8
  -5   2   8 827.754 111.617   1
   5  -2   8 883.815 122.944   1
   5  -2   7 850.104 83.0662   4
   5  -2   7 831.069 78.2546  10
  -5   2   7 943.966 79.7442   8
   5   2  -7 776.888 98.6587   7
  -5   2   7 839.136 77.1607   9
  -5   2   7 901.458 107.799   1
   5  -2   6 1189.55 116.946   4
   5  -2   6 1378.63 114.389  10
   5   2  -6 1518.00 140.827   7
  -5   2   6 1288.37 113.087   9
  -5   2   6 1549.03 115.880   8
  -5   2   6 1417.93 143.185   1
  -5   2   5 3486.25 265.471   1
   5   2  -5 3118.18 257.336   7
   5  -2   5 2786.91 236.692   4
  -5   2   4 2640.70 221.847   1
   5   2  -4 2455.48 218.359   7
  -5   2   3 1837.45 148.721   1
   5   2  -3 1524.77 146.829   7
  -5   2   2 2004.30 164.478   1
   5   2  -2 2011.72 169.516   7
   5   2  -1 1572.94 133.426   7
   5  -2   0 2552.86 200.805   6
   5   2   1 1186.40 94.6109   6
   5  -2  -1 1088.74 90.9452   6
   5   2   2 1565.75 130.593   1
   5   2   3 1752.43 153.117   1
   5   2   4 2721.22 235.035   1
   5   2   5 2520.23 211.815   4
   5   2   5 3167.17 242.617   1
   5   2   6 1137.22 111.347   4
   5   2   6 1387.47 110.086  10
  -5   2  -6 1357.36 138.374   7
   5   2   6 1427.07 140.790   1
   5   2   7 617.659 64.4299   4
   5   2   7 572.435 60.0245  10
  -5   2  -7 617.391 90.6696   7
  -5  -2   7 668.023 59.3589   8
   5   2   7 696.099 92.0328   1
   5   2   8 833.923 79.0862  10
  -5  -2   8 845.286 75.1212   8
  -5  -2   8 844.042 112.109   1
   5   2   8 725.802 109.016   1
   5   2   9 146.568 27.9156  10
  -5  -2   9 181.536 26.1870  10
  -5  -2  10 245.473 30.7568  10
  -5   2 -11 41.1461 27.9048   5
  -5  -2  11 12.8708 10.3855  10
   5   3 -11 49.2664 31.8332   5
  -5   3  11 34.2263 14.6830  10
  -5   3  10 500.359 52.7791  10
  -5   3   9 566.545 59.2135   9
  -5   3   9 654.822 63.3523  10
  -5   3   9 657.346 61.7772   8
  -5   3   8 435.169 46.1791   9
   5  -3   8 427.930 47.9286  10
  -5   3   8 422.437 46.4344   8
   5  -3   8 412.875 88.4222   1
  -5   3   8 397.389 74.6176   1
   5  -3   7 630.559 66.1319   4
  -5   3   7 728.824 92.7429   1
   5  -3   7 689.785 63.1146  10
   5   3  -7 632.362 87.8613   7
  -5   3   7 658.401 61.5240   9
  -5   3   7 572.441 61.2858   8
   5  -3   6 134.149 25.4902   4
   5   3  -6 124.758 41.2293   7
   5  -3   6 147.184 20.8865  10
  -5   3   6 126.645 21.4465   8
  -5   3   6 117.857 20.8535   9
  -5   3   6 137.026 40.4047   1
  -5   3   5 3068.92 231.219   1
   5   3  -5 2577.26 223.602   7
   5  -3   5 2340.13 201.511   4
  -5   3   4 8772.57 654.564   1
   5   3  -4 7738.53 651.022   7
  -5   3   3 823.348 78.1383   1
   5   3  -3 685.817 77.7999   7
  -5   3   2 1035.34 94.1832   1
   5   3  -2 1136.26 100.926   7
  -5   3   1 4716.50 373.253   2
   5   3   0 3432.79 267.126   6
   5   3   1 4396.73 337.024   6
   5  -3  -1 4117.05 333.034   6
   5   3   1 4701.08 342.426   2
   5  -3  -2 818.088 66.2800   6
   5   3   2 735.092 72.0378   1
   5   3   3 786.587 78.4953   1
   5   3   4 8162.73 648.063   1
   5   3   5 2253.94 189.785   4
   5   3   5 2729.02 218.483   1
   5   3   6 153.249 27.2263   4
   5   3   6 176.832 24.9557   9
   5   3   6 192.687 24.7227  10
  -5   3  -6 141.035 44.8011   7
   5   3   6 196.604 46.9846   1
   5   3   7 589.894 66.9337   4
   5   3   7 649.839 64.5293  10
  -5  -3   7 729.274 62.4043   8
  -5   3  -7 687.510 99.0526   7
   5   3   7 721.448 95.5052   1
   5   3   8 501.148 56.1565  10
  -5  -3   8 559.412 52.1635   8
  -5  -3   8 442.793 87.1208   1
   5   3   8 552.028 87.9571   1
   5   3   9 676.244 69.3151  10
  -5  -3   9 693.674 65.1982  10
  -5  -3  10 517.981 50.2953  10
  -5   3 -11 18.7012 28.1294   5
   5   4 -11 88.8821 38.0291   5
   5   4 -10 213.340 42.8343   5
  -5   4   9 277.974 34.7009   8
  -5   4   9 230.911 32.5926   9
  -5   4   8 21.1690 32.6375   1
   5  -4   8 10.7745 14.3525  10
  -5   4   8 11.3883 15.9159   8
  -5   4   8 7.91689 16.7708   9
   5  -4   7 344.498 43.7068   4
   5   4  -7 349.295 67.9751   7
  -5   4   7 343.859 65.6018   1
   5  -4   7 345.641 39.2827  10
  -5   4   7 322.906 39.9279   8
  -5   4   7 326.456 38.7448   9
   5  -4   6 346.386 41.2984   4
   5   4  -6 295.211 58.2905   7
   5  -4   6 360.278 37.1232  10
  -5   4   6 324.765 36.2956   9
  -5   4   6 343.616 37.3347   8
  -5   4   6 282.682 57.3810   1
  -5   4   5 1088.57 106.650   1
   5   4  -5 960.679 103.427   7
   5  -4   5 820.236 80.1289   4
  -5   4   4 730.773 82.6744   1
   5   4  -4 725.478 84.2768   7
   5   4  -3 240.234 44.3647   7
  -5   4   3 283.912 39.8961   1
   5   4  -2 64.4872 23.4849   7
  -5   4   2 96.8965 23.6821   2
  -5   4   1 850.708 89.0398   2
   5   4   0 1851.63 147.889   6
   5   4   1 1394.95 118.970   6
   5  -4  -1 1505.70 115.863   6
   5   4   1 1277.58 130.681   2
   5  -4  -2 44.7965 10.4040   6
   5  -4  -3 208.633 23.2426   6
   5   4   3 176.982 33.6044   1
   5   4   4 612.867 72.8803   1
   5   4   5 895.551 83.0616   4
   5   4   5 1143.77 110.284   1
   5   4   6 402.424 44.2492   4
   5   4   6 349.958 39.0252   9
  -5   4  -6 421.456 70.8682   7
   5   4   6 423.241 66.7087   1
   5   4   7 247.255 36.1931   4
   5   4   7 206.337 30.3310   9
  -5   4  -7 287.134 65.8494   7
  -5  -4   7 292.958 31.0288   8
   5   4   7 291.572 59.5154   1
   5   4   8 11.1240 33.6078   1
  -5  -4   9 283.273 33.3266  10
  -5  -4  10 121.287 18.7319  10
  -5   4 -11 91.5975 38.4045   5
   5   5 -10 424.890 57.9962   5
  -5   5  10 317.073 39.4641  10
  -5   5   9 482.384 50.1538   8
  -5   5   9 469.432 49.9392   9
  -5   5   9 449.201 50.3579  10
   5   5  -8 290.956 67.6628   7
  -5   5   8 339.278 39.3412   8
  -5   5   8 314.470 39.2481  10
  -5   5   8 287.413 38.0690   9
   5   5  -7 62.2243 44.8906   7
   5  -5   7 111.051 22.4887  10
  -5   5   7 119.260 22.9465   9
  -5   5   6 740.617 97.8263   1
  -5   5   6 752.463 67.8728   9
   5   5  -6 658.548 94.7775   7
   5  -5   6 749.020 72.8296   4
  -5   5   5 881.956 97.9067   1
   5   5  -5 784.293 97.0787   7
   5  -5   5 801.567 75.0575   4
  -5   5   4 1625.66 157.243   1
   5   5  -4 1769.09 161.322   7
   5   5  -3 1275.80 122.807   7
  -5   5   2 979.982 97.7557   2
  -5   5   1 415.911 66.3413   2
   5   5  -1 355.375 45.7075   7
   5   5   0 1689.78 134.819   6
   5   5   0 1633.69 141.780   7
   5   5   1 271.923 31.3775   6
   5   5   1 187.821 49.0974   2
   5  -5  -2 927.970 75.4759   6
   5   5   2 854.981 90.1813   2
   5  -5  -3 1126.57 90.7014   6
   5   5   4 1436.40 137.338   1
   5   5   5 755.988 70.3450   4
   5   5   5 810.445 93.3915   1
   5   5   6 828.586 79.4056   4
   5   5   6 876.123 105.658   1
   5   5   6 948.483 79.3928  10
   5   5   6 836.540 76.2017   9
  -5   5  -6 824.866 108.886   7
   5   5   7 76.3116 19.5457  10
  -5   5  -7 74.6120 49.4441   7
   5   5   7 80.0160 19.8128   9
  -5   5  -8 389.311 84.5884   7
  -5  -5   8 358.872 39.3990  10
  -5  -5   9 532.039 51.5035  10
  -5  -5  10 282.052 30.1057  10
  -5   5 -10 280.195 50.1009   5
  -5   6  10 151.679 25.0257  10
   5   6 -10 165.833 45.8464   5
  -5   6   9 713.826 72.5490  10
  -5   6   9 724.774 72.0843   9
  -5   6   8 460.601 50.6773   9
  -5   6   8 460.648 49.6671  10
   5   6  -8 451.610 86.8016   7
  -5   6   8 431.554 90.5632   2
  -5   6   7 460.245 49.9764   8
  -5   6   7 479.666 50.3378   9
   5   6  -7 469.083 84.8310   7
  -5   6   6 2944.89 240.390   9
  -5   6   6 2958.24 240.755   8
   5   6  -6 2937.70 276.215   7
   5  -6   6 3175.69 245.301   4
   5   6  -5 1885.36 185.570   7
   5  -6   5 1926.05 159.802   4
  -5   6   4 1035.45 109.579   2
   5   6  -4 815.474 99.2971   7
  -5   6   3 4343.37 357.839   2
   5   6  -3 4211.17 352.588   7
  -5   6   2 738.370 86.7750   2
  -5   6   1 1066.23 140.659   2
   5   6  -1 1327.43 115.601   7
   5   6   0 8905.17 687.644   6
   5   6   0 9024.10 695.884   7
   5   6   1 976.110 84.6111   6
   5   6   1 832.660 118.256   2
   5   6   2 687.256 81.9028   2
   5   6   3 4441.17 368.289   2
  -5   6  -5 1541.12 157.584   7
   5   6   5 1554.31 129.883   4
   5   6   6 2584.20 221.465   4
   5   6   6 2751.59 218.572   9
   5   6   6 2888.46 222.466  10
  -5   6  -6 2732.09 258.905   7
   5   6   7 614.024 58.7105   9
   5   6   7 587.006 61.7332  10
  -5   6  -7 667.070 101.441   7
   5   6   8 378.467 50.4432  10
  -5  -6   8 531.855 47.5204  10
  -5   6  -8 455.456 94.2285   7
   5   6   8 473.347 94.7269   2
  -5   6  -9 705.520 92.7249   5
  -5  -6   9 815.175 70.4087  10
  -5   6 -10 68.0341 38.0988   5
   5   7 -10 870.315 105.287   5
  -5   7  10 891.369 80.0531  10
   5   7  -9 1116.92 108.992   5
  -5   7   9 884.226 81.1349  10
  -5   7   9 870.263 81.3314   9
  -5   7   9 820.861 79.7492   8
   5   7  -8 594.032 74.3397   5
   5   7  -8 422.310 86.6651   7
  -5   7   8 411.281 89.2422   2
  -5   7   8 448.677 47.2903  10
  -5   7   8 410.654 46.3654   8
  -5   7   8 361.435 46.7469   9
   5   7  -7 543.203 94.7464   7
  -5   7   7 550.506 99.1428   2
  -5   7   7 558.409 54.3405   8
  -5   7   7 461.811 53.1189   9
  -5   7   7 489.026 52.2751  10
  -5   7   6 1201.08 146.606   2
  -5   7   6 1131.59 97.6543   8
  -5   7   6 1050.43 97.0081   9
   5   7  -6 1206.85 135.512   7
   5  -7   5 377.771 43.4992   4
   5   7  -5 353.920 65.5847   7
  -5   7   5 296.208 64.9884   2
  -5   7   4 603.915 85.6111   2
   5   7  -4 599.054 79.2599   7
  -5   7   3 1788.34 175.980   2
  -5   7   2 1480.61 161.933   2
   5   7  -2 1630.46 146.459   7
  -5   7   1 4500.09 398.787   2
   5   7  -1 4356.48 355.637   7
   5   7   0 4523.52 349.478   6
   5   7   0 4379.85 358.241   7
   5   7   1 4466.04 327.981   6
   5   7   1 2870.25 363.658   2
   5   7   2 1217.86 134.648   2
   5   7   3 1462.45 149.309   2
   5   7   4 473.130 72.9240   2
   5   7   5 232.891 30.8322   4
   5   7   5 223.160 29.7119  10
  -5   7  -5 253.193 55.4918   7
   5   7   5 260.826 28.7022   9
   5   7   5 329.764 64.7410   2
   5   7   6 1025.67 90.0104   4
   5   7   6 1280.04 142.223   2
  -5   7  -6 1036.52 125.640   7
   5   7   6 921.503 89.3274  10
   5   7   6 978.263 86.0504   9
   5   7   7 372.923 82.8004   2
   5   7   7 329.616 38.5326   9
   5   7   7 391.040 44.6006  10
  -5   7  -7 266.466 72.6603   7
  -5   7  -8 318.629 86.1423   7
  -5   7  -8 403.468 69.9977   5
   5   7   8 401.178 88.7284   2
  -5   7  -9 628.411 85.8258   5
  -5   7 -10 660.045 87.8566   5
   5   8 -10 64.0218 50.6733   5
  -5   8  10 165.239 23.1414  10
   5   8  -9 846.048 104.799   5
  -5   8   9 811.667 73.1603  10
  -5   8   9 731.706 73.5724   9
   5   8  -8 686.016 91.5812   5
  -5   8   8 493.225 53.2415  10
  -5   8   8 523.729 54.0652   8
  -5   8   8 515.943 56.1202   9
  -5   8   7 592.717 60.0185  10
  -5   8   7 619.109 61.5541   8
   5   8  -7 657.823 104.484   7
  -5   8   7 576.465 62.5201   9
  -5   8   7 462.741 104.254   2
  -5   8   6 955.282 140.261   2
  -5   8   6 909.898 89.3500   8
   5   8  -6 864.255 123.835   7
  -5   8   5 4078.21 410.150   2
  -5   8   5 4469.07 362.316   8
   5   8  -5 4113.65 395.581   7
  -5   8   4 6613.95 579.038   2
   5   8  -4 7078.67 565.123   7
  -5   8   3 1879.67 194.879   2
  -5   8   2 1234.70 160.886   2
   5   8  -2 1510.95 137.359   7
  -5   8   1 410.451 91.9313   2
   5   8  -1 443.260 57.9892   7
   5   8   0 2462.14 195.443   6
   5   8   0 2371.09 205.161   7
   5   8   1 680.585 63.8033   6
   5   8   1 496.197 107.118   2
   5   8   2 1005.38 134.531   2
   5   8   3 1781.01 183.403   2
   5   8   4 6060.82 515.727   2
   5   8   5 3904.97 319.747   4
  -5   8  -5 4103.64 345.621   5
   5   8   5 4101.87 321.825  10
   5   8   5 4197.74 317.902   9
  -5   8  -5 3630.56 352.060   7
   5   8   5 4425.43 376.635   2
  -5   8  -6 797.013 107.294   5
   5   8   6 815.481 83.7995  10
   5   8   6 1003.52 81.4930   9
  -5   8  -6 885.875 119.013   7
  -5   8  -7 464.123 84.1282   5
   5   8   7 497.165 50.1159   9
  -5   8  -7 479.421 92.1901   7
   5   8   7 597.178 111.277   2
  -5   8  -8 474.863 87.5545   5
  -5   8  -9 392.270 76.0899   5
  -5   8 -10 67.8704 47.0067   5
  -5   9   9 1073.43 77.6528  10
  -5   9   9 1216.06 81.8106   9
  -5   9   8 918.987 83.1019  10
  -5   9   8 800.005 81.6641   8
  -5   9   8 1005.10 87.1209   9
   5   9  -7 1285.70 145.073   5
  -5   9   7 964.619 159.283   2
  -5   9   7 1065.53 96.5688  10
  -5   9   7 1147.98 98.3445   8
   5   9  -7 1045.44 142.823   7
   5   9  -6 326.166 73.0444   5
   5   9  -6 213.356 63.8931   7
  -5   9   6 227.994 80.8990   2
  -5   9   6 236.884 30.2754  10
  -5   9   6 278.325 34.0916   8
   5   9  -5 118.554 48.7405   7
  -5   9   5 110.538 61.2482   2
  -5   9   5 153.232 23.7992   8
   5   9  -5 170.476 58.9776   5
  -5   9   4 942.009 143.278   2
   5   9  -4 1358.16 139.985   5
  -5   9   3 439.228 93.0108   2
   5   9  -3 571.702 75.8791   7
  -5   9   2 328.177 90.5443   2
   5   9  -2 517.138 67.0265   7
   5   9  -1 4560.69 374.012   7
   5   9   0 1840.17 148.787   6
   5   9   0 1721.66 158.966   7
   5   9   1 4651.86 365.367   6
   5   9   2 334.471 85.0508   2
   5   9   3 353.645 82.5750   2
  -5   9  -4 656.595 95.2877   5
   5   9   4 857.379 120.239   2
  -5   9  -5 139.678 57.8649   5
   5   9   5 117.470 19.0928   9
  -5   9  -5 72.8624 41.4190   7
   5   9   5 57.0026 54.6990   2
  -5   9  -6 211.553 71.2241   5
   5   9   6 150.429 23.3581   9
  -5   9  -6 96.9498 47.3966   7
   5   9   6 165.893 72.7372   2
  -5   9  -7 732.635 124.408   5
   5   9   7 930.425 80.0760   9
  -5   9  -7 844.887 125.961   7
   5   9   7 884.187 148.181   2
  -5   9  -8 689.623 112.332   5
  -5   9  -9 30.3359 54.3961   5
  -5   9 -10 274.677 61.2625   5
   5  10 -10 162.686 41.8437   5
   5  10  -9 25.1901 57.3031   5
   5  10  -8 96.5995 81.6933   5
  -5  10   8 380.651 39.5482   8
   5  10  -7 116.339 83.2879   5
   5  10  -7 183.386 61.1541   7
  -5  10   7 176.528 25.9007  10
  -5  10   7 191.446 29.1137   8
  -5  10   7 146.479 82.1842   2
   5  10  -6 1211.43 166.134   5
  -5  10   6 1268.16 109.426  10
   5  10  -6 1394.79 159.420   7
  -5  10   6 1447.04 112.616   8
  -5  10   6 1171.15 112.803   9
  -5  10   6 1057.77 185.299   2
  -5  10   5 1985.44 274.863   2
  -5  10   5 2782.84 210.258   8
   5  10  -5 2503.55 249.549   7
   5  10  -5 2211.91 256.733   5
   5  10  -4 2462.53 256.724   5
  -5  10   4 2807.43 292.984   2
  -5  10   3 342.399 45.2316   5
  -5  10   3 251.152 87.4602   2
   5  10  -3 413.192 65.3117   7
   5  10  -2 217.212 45.9575   7
  -5  10   2 175.166 69.2125   2
   5  10  -1 364.735 55.1079   7
  -5  10   1 308.949 39.7225   7
   5  10   0 60.7097 19.0664   6
   5  10   0 46.0475 26.8739   7
  -5  10   0 43.2578 24.6340   7
   5  10   2 174.486 84.7282   2
  -5  10  -2 322.852 52.8607   7
   5  10   3 428.135 46.7130   5
  -5  10  -3 54.7933 54.0181   5
  -5  10  -3 452.710 64.7755   7
   5  10   3 169.908 80.3991   2
  -5  10  -4 2655.24 275.949   5
  -5  10  -4 3143.35 272.804   7
   5  10   4 3108.52 314.695   2
   5  10   5 2290.47 167.745   9
   5  10   5 1831.96 240.762   2
  -5  10  -6 739.172 150.781   5
   5  10   6 1123.32 171.177   2
   5  10   6 1058.50 89.9717   9
  -5  10  -6 1073.54 135.229   7
  -5  10  -7 140.669 58.9710   7
   5  10   7 105.814 80.2465   2
   5  10   7 170.831 24.5666   9
  -5  10  -7-7.70006 78.0014   5
  -5  10  -8 145.062 78.8354   5
  -5  10  -9 15.8316 57.8464   5
  -5  10 -10 77.0692 35.4725   5
   5  11  -9 473.299 83.6229   5
   5  11  -8 66.5975 72.6984   5
   5  11  -7 90.4999 92.7136   5
  -5  11   7 154.209 25.1049   8
  -5  11   7 190.485 32.2940   9
   5  11  -7 182.129 65.8415   7
  -5  11   6 145.900 95.9043   2
   5  11  -6 182.445 101.062   5
  -5  11   6 265.917 33.4021   8
  -5  11   6 341.445 40.7551   9
   5  11  -6 294.408 71.3596   7
  -5  11   5 1497.54 250.201   2
   5  11  -5 793.385 197.947   5
  -5  11   4 1634.05 129.391   8
   5  11  -4 1535.99 168.583   7
  -5  11   3 107.400 33.5745  12
   5  11  -3 160.498 38.8767  12
   5  11  -3 191.826 50.4434   7
   5  11  -3 59.6794 56.1972   5
  -5  11   3 172.409 34.0123   5
  -5  11   3 120.409 79.4275   2
   5  11  -2 178.057 50.1968   5
  -5  11   2 189.956 31.9800   5
   5  11  -2 163.956 42.6588  12
  -5  11   2 116.774 34.4457  12
   5  11  -2 223.337 49.1132   7
   5  11  -1 1269.73 110.454   6
   5  11  -1 1209.52 126.076   7
   5  11   0 1834.01 148.627   6
  -5  11   0 1674.26 158.101   7
  -5  11  -1 1272.26 126.873   7
   5  11   2 136.510 38.3981  12
  -5  11  -2 197.010 38.7441  12
  -5  11  -2 203.180 49.2895   5
   5  11   2 152.306 31.5581   5
  -5  11  -2 147.203 41.2875   7
   5  11   3 193.741 40.9298  12
  -5  11  -3 233.577 49.1041  12
   5  11   3 160.045 78.8856   2
   5  11   3 269.114 41.5930   5
  -5  11  -3 337.324 70.2854   5
  -5  11  -3 289.716 58.7691   7
   5  11   4 1037.66 91.2076  12
  -5  11  -4 1608.44 135.609   7
   5  11   4 758.673 159.768   2
   5  11   5 2080.15 149.798   9
   5  11   5 1493.52 238.886   2
  -5  11  -6 45.4733 88.4230   5
   5  11   6 242.543 29.1446   9
  -5  11  -6 183.615 61.7139   7
   5  11   6 126.533 93.2091   2
  -5  11  -7 98.2735 99.5524   5
   5  11   7 192.097 26.1782   9
  -5  11  -8 93.2166 74.3094   5
  -5  11  -9 470.817 80.4277   5
   5  12  -9 113.719 43.3609   5
  -5  12   9 178.059 24.4353   9
   5  12  -8 536.552 98.0199   5
  -5  12   8 575.184 57.5949   9
   5  12  -7 131.771 83.1517   5
  -5  12   7 167.373 24.2091   8
  -5  12   7 161.336 29.6177   9
  -5  12   6 66.6688 80.6414   2
  -5  12   6 173.518 24.4724   8
  -5  12   6 209.843 32.4983   9
   5  12  -6 173.978 62.6338   7
   5  12  -5 1046.98 166.490   5
  -5  12   5 1317.72 106.461   8
   5  12  -4 88.6465 48.2625   7
   5  12  -4 79.9600 61.3081   5
  -5  12   4 113.201 90.9119   2
   5  12  -3 307.249 69.8017   5
   5  12  -3 278.526 53.7515  12
  -5  12   3 202.793 46.3224  12
  -5  12   3 442.863 51.0287   5
   5  12  -3 376.356 66.8739   7
   5  12  -2 26.2257 34.2746   5
  -5  12   2 24.6557 22.2542   5
  -5  12   2 2.00379 28.7253  12
   5  12  -2 2.53294 33.6529  12
   5  12  -2 4.44493 31.0202   7
   5  12  -1 1236.48 133.401  12
  -5  12   1 1201.66 125.286  12
  -5  12   1 1517.94 128.474   5
   5  12  -1 1599.31 125.163   6
   5  12  -1 1292.92 134.557   5
   5  12  -1 1661.54 147.290   7
  -5  12   0 791.389 89.9097  12
   5  12   0 938.552 98.4278  12
  -5  12   0 1002.48 94.0209   5
   5  12   0 887.332 93.9061   5
  -5  12   0 1038.88 98.9883   7
  -5  12  -1 1080.13 111.801  12
   5  12   1 1181.95 117.786  12
   5  12   1 1194.51 112.486   5
  -5  12  -1 1365.40 127.754   7
  -5  12  -1 1222.69 116.534   5
   5  12   2 33.7707 34.4896  12
  -5  12  -2 8.75418 29.9969  12
  -5  12  -2 23.4396 32.0459   5
   5  12   2 57.8525 25.2274   5
  -5  12  -2 4.30591 29.6305   7
   5  12   3 190.829 46.0966  12
  -5  12  -3 267.584 55.6590  12
   5  12   3 358.046 48.7036   5
  -5  12  -3 307.893 67.0115   5
  -5  12  -3 303.923 62.2861   7
   5  12   4 47.6039 36.0471  12
  -5  12  -4 63.6442 63.3495   5
  -5  12  -4 66.9111 40.2178   7
   5  12   4-40.7165 85.3908   2
  -5  12  -5 872.775 145.507   5
   5  12   5 1013.69 79.1721   9
  -5  12  -5 754.771 115.608   7
   5  12   6 108.460 19.4156   9
   5  12   6 176.782 103.306   2
  -5  12  -7 16.6384 83.9718   5
  -5  12  -8 622.451 108.511   5
  -5  12  -9 115.232 41.7473   5
  -5  13   9 57.8989 14.3398   9
   5  13  -9 65.3622 27.6125   5
  -5  13   8 34.8546 17.1099   9
   5  13  -8-12.3577 44.9067   5
  -5  13   7 282.619 37.4732   9
   5  13  -7 257.580 81.0558   5
  -5  13   6 84.5972 114.285   2
   5  13  -6 59.2530 67.7614   5
  -5  13   6 23.6736 19.8481   9
   5  13  -5 61.3965 45.5215   7
   5  13  -5 21.2931 69.0576   5
  -5  13   5 132.782 102.426   2
   5  13  -4 225.393 71.4140   5
   5  13  -4 252.166 51.6561  12
   5  13  -4 240.705 65.6102   7
  -5  13   3 235.516 41.9047   5
   5  13  -3 248.856 59.8487   5
  -5  13   3 231.445 48.4333  12
   5  13  -3 234.992 52.4231  12
   5  13  -3 353.947 72.7722   7
   5  13  -2 407.104 66.8395  12
  -5  13   2 364.573 59.5270  12
   5  13  -2 550.983 58.4488   6
  -5  13   2 549.427 59.5770   5
   5  13  -2 396.090 67.3982   5
   5  13  -2 502.433 77.9568   7
   5  13  -1 63.9031 32.4782   5
  -5  13   1 136.231 29.3827   5
   5  13  -1 114.128 47.3430  12
  -5  13   1 108.599 35.5246  12
   5  13  -1 117.347 41.9510   7
   5  13   0-14.6361 39.0450  12
  -5  13   0 11.1297 29.9460  12
   5  13   0 2.53689 25.2259   5
  -5  13   0 20.5280 23.0280   5
  -5  13  -1 126.271 38.2831  12
   5  13   1 113.670 46.0141  12
  -5  13  -1 107.124 32.9545   5
   5  13   1 121.556 31.1263   5
  -5  13  -1 117.942 36.2164   7
   5  13   2 515.993 71.1969  12
  -5  13  -2 498.997 68.9625  12
   5  13   2 526.626 63.2635   5
  -5  13  -2 476.631 68.1928   5
  -5  13  -2 514.581 80.2948   7
   5  13   3 208.005 50.1115  12
  -5  13  -3 290.662 57.8875  12
   5  13   3 306.749 50.1788   5
  -5  13  -3 373.783 67.5533   7
  -5  13  -3 254.326 60.3429   5
   5  13   4 160.855 43.7274  12
  -5  13  -4 90.2274 61.8753   5
  -5  13  -4 129.638 52.3961   7
  -5  13  -5 64.1177 73.7981   5
  -5  13  -5 99.3697 46.4316   7
   5  13   5 79.1418 99.7399   2
  -5  13  -6 15.4777 73.3037   5
   5  13   6 16.3115 85.3373   2
  -5  13  -7 291.432 86.5603   5
  -5  13  -8-17.1383 44.8459   5
  -5  13  -9 97.9925 29.4347   5
   5  14  -8 524.830 72.8702   5
  -5  14   8 615.961 55.4615   9
  -5  14   7 929.909 82.1625   9
   5  14  -7 804.046 114.308   5
  -5  14   6 804.327 74.3875   9
   5  14  -6 670.775 111.819   5
   5  14  -5 406.501 89.4968   5
   5  14  -5 608.691 100.447   7
   5  14  -4 209.240 62.7253   5
   5  14  -4 115.758 45.7877  12
   5  14  -4 164.179 57.8448   7
   5  14  -3 12.4773 42.3214   5
  -5  14   3 23.9252 27.0808   5
   5  14  -3-2.96735 40.6120  12
  -5  14   3 15.5275 36.9753  12
   5  14  -3 65.1733 42.6301   7
   5  14  -2 1868.75 178.900  12
  -5  14   2 1676.25 170.745  12
  -5  14   2 2230.68 172.871   5
   5  14  -2 1738.86 176.833   5
   5  14  -2 2201.46 199.879   7
   5  14  -1 1368.64 142.212  12
   5  14  -1 1293.47 133.628   5
  -5  14   1 1511.80 130.917   5
   5  14   0 311.941 64.8256  12
  -5  14   0 313.957 54.3467  12
   5  14   0 292.072 49.1506   5
  -5  14   0 360.292 48.4737   5
   5  14   1 1276.16 127.148  12
  -5  14  -1 1111.78 118.220  12
   5  14   1 1173.41 114.857   5
  -5  14  -1 1216.59 117.162   5
  -5  14  -1 1183.50 128.287   7
   5  14   2 1742.69 172.072  12
  -5  14  -2 1810.94 170.875  12
   5  14   2 1939.37 168.129   5
  -5  14  -2 1791.33 185.820   7
  -5  14  -2 1961.24 173.015   5
   5  14   3 5.67929 39.3361  12
  -5  14  -3 73.1087 46.4776  12
  -5  14  -3 38.9378 40.3540   5
   5  14   3 87.0058 34.3307   5
  -5  14  -3 44.7029 38.5554   7
  -5  14  -4 276.089 66.4144   5
   5  14   4 174.534 48.8132  12
  -5  14  -4 187.839 57.4906   7
  -5  14  -5 493.019 89.8991   7
  -5  14  -5 626.121 99.3336   5
  -5  14  -6 1016.34 135.778   5
  -5  14  -7 988.686 123.309   5
  -5  14  -8 594.453 76.0884   5
   5  15  -8 106.241 28.9243   5
  -5  15   7 291.174 33.5293   9
   5  15  -7 242.938 53.6609   5
  -5  15   6 186.283 27.8419   9
   5  15  -6 153.103 58.2173   5
  -5  15   5 349.590 41.1733   9
   5  15  -5 363.790 73.4675   5
   5  15  -4 1097.33 114.756  12
   5  15  -4 1026.67 124.404   5
   5  15  -4 1178.91 149.024   7
   5  15  -3 226.885 53.3227   5
  -5  15   3 293.998 48.8253   5
   5  15  -3 240.685 57.5592  12
   5  15  -3 267.084 68.9648   7
  -5  15   2 1699.61 176.770  12
   5  15  -2 2009.28 186.615  12
  -5  15   2 2386.28 177.958   5
   5  15  -2 1726.18 178.244   5
   5  15  -2 1992.59 201.697   7
   5  15  -1 540.169 83.1929  12
  -5  15   1 613.506 67.1079   5
   5  15  -1 470.983 67.6038   5
   5  15   0 1425.41 138.695  12
  -5  15   0 1266.56 126.300  12
   5  15   0 1107.65 117.907   5
  -5  15   0 1238.72 118.146   5
  -5  15  -1 506.221 74.0311  12
  -5  15  -1 467.580 62.9120   5
   5  15   1 509.000 63.1126   5
   5  15   2 1874.79 173.868  12
  -5  15  -2 1708.90 169.227  12
  -5  15  -2 1713.57 165.432   5
   5  15   2 1855.16 164.916   5
  -5  15  -2 1852.10 185.890   7
   5  15   3 105.378 37.1023   5
  -5  15  -3 157.027 44.6996   5
   5  15   3 114.628 48.4758  12
  -5  15  -3 102.493 46.3829   7
   5  15   4 984.289 107.468  12
  -5  15  -4 900.487 130.032   7
  -5  15  -4 1105.52 120.560   5
  -5  15  -5 305.345 68.0479   5
  -5  15  -6 185.141 59.2844   5
  -5  15  -7 355.582 61.6723   5
  -5  15  -8 101.606 28.2324   5
   5  16  -7 276.732 44.2753   5
  -5  16   6 826.033 75.2889   9
   5  16  -6 952.140 100.192   5
  -5  16   5 1062.31 92.4935   9
   5  16  -5 1002.70 116.314   5
   5  16  -4 659.050 88.7244   5
   5  16  -4 795.964 90.6920  12
   5  16  -3 695.823 85.9901  12
  -5  16   3 634.991 74.7059   5
   5  16  -3 478.886 74.8149   5
   5  16  -2 45.9415 32.8371   5
  -5  16   2 78.1677 28.7271   5
   5  16  -2 68.0357 53.5635  12
  -5  16   2 54.6803 44.4192  12
   5  16  -1 1090.06 118.423  12
  -5  16   1 938.956 95.2248   5
   5  16  -1 866.674 97.1802   5
   5  16   0 73.8035 31.5376   5
  -5  16   0 84.3479 28.3127   5
   5  16   0 46.7221 59.2750  12
  -5  16   0 76.6902 53.4669  12
  -5  16  -1 919.722 110.977  12
  -5  16  -1 967.256 99.1760   5
   5  16   1 1020.99 101.267   5
  -5  16  -2 65.4385 33.0593   5
   5  16   2 52.5518 31.2400   5
   5  16   2 58.7118 49.5191  12
  -5  16  -2 84.0733 51.7392  12
   5  16   3 647.377 82.2314  12
  -5  16  -3 581.326 75.0503   5
   5  16   3 585.870 74.9645   5
  -5  16  -3 490.748 86.3905   7
  -5  16  -4 731.372 89.0003   5
   5  16   4 680.855 85.7424  12
  -5  16  -5 987.569 111.827   5
  -5  16  -6 1060.59 114.588   5
  -5  16  -7 321.955 48.5807   5
   5  17  -7 64.9732 21.7279   5
   5  17  -6 202.955 39.3681   5
   5  17  -5 524.312 69.3506   5
   5  17  -4 208.768 47.7130   5
   5  17  -4 281.237 56.6035  12
   5  17  -3 215.591 45.3462   5
   5  17  -3 203.340 58.6594  12
   5  17  -2 844.444 99.1379  12
   5  17  -2 598.827 76.0928   5
  -5  17   2 636.430 74.3948   5
   5  17  -1 846.552 106.929  12
  -5  17   1 863.125 83.9667   5
   5  17  -1 659.741 81.9894   5
   5  17   0 2051.36 180.469  12
  -5  17   0 1591.66 165.576  12
   5  17   0 1672.26 154.447   5
  -5  17   0 1629.87 151.848   5
  -5  17  -1 675.222 92.6431  12
  -5  17  -1 657.700 73.6166   5
   5  17   1 635.767 75.2975   5
   5  17   2 586.350 86.0797  12
  -5  17  -2 606.687 71.4137   5
   5  17   2 549.687 70.7850   5
  -5  17  -3 168.554 40.0727   5
   5  17   3 172.603 54.3502  12
  -5  17  -4 178.110 44.2300   5
  -5  17  -5 459.879 64.4647   5
  -5  17  -6 213.253 42.0974   5
  -5  17  -7 140.572 27.4372   5
   5  18  -6 148.448 28.7567   5
   5  18  -5 475.847 59.2569   5
   5  18  -4 665.286 80.6329  12
   5  18  -4 656.637 75.4938   5
   5  18  -3 565.518 78.3507  12
   5  18  -3 514.591 65.5385   5
   5  18  -2 251.983 44.4523   5
   5  18  -2 304.922 68.8320  12
  -5  18   2 263.794 44.2377   5
  -5  18   1 121.771 30.6056   5
   5  18  -1 58.2481 27.6416   5
   5  18  -1 136.527 65.0747  12
   5  18   0 55.6002 28.0396   5
  -5  18   0 91.9865 28.4888   5
   5  18   0 72.1668 64.5061  12
   5  18   1 95.4462 31.9400   5
  -5  18  -1 84.0266 29.0793   5
   5  18   2 351.725 67.6435  12
  -5  18  -2 283.456 46.9952   5
   5  18   2 375.260 51.8772   5
   5  18   3 602.297 80.4504  12
  -5  18  -3 532.511 66.7023   5
  -5  18  -4 838.739 88.7548   5
  -5  18  -5 438.957 56.4088   5
  -5  18  -6 191.030 32.8056   5
   5  19  -5 231.490 34.7430   5
   5  19  -4 216.389 36.6400   5
   5  19  -3 10.5346 23.5258   5
   5  19  -3-18.5173 43.7612  12
  -5  19   2 107.224 31.1865   5
   5  19  -2 110.466 30.3227   5
   5  19  -2 123.268 55.3382  12
   5  19  -1 378.588 74.4856  12
  -5  19   1 260.775 42.4585   5
   5  19  -1 246.665 41.0763   5
   5  19   0 398.864 78.9949  12
   5  19   0 349.160 48.9741   5
  -5  19   0 328.798 46.8248   5
  -5  19  -1 298.576 42.7340   5
   5  19   1 291.996 45.8154   5
   5  19   2 32.5611 28.9398   5
  -5  19  -2 80.8797 27.4896   5
   5  19   2 105.569 53.7233  12
  -5  19  -3 28.6844 24.5518   5
   5  19   3 2.67732 43.4529  12
  -5  19  -4 219.890 36.6869   5
  -5  19  -5 205.196 32.9416   5
   5  20  -4 325.470 39.5971   5
   5  20  -3 36.8235 21.3511   5
   5  20  -3 45.7615 40.9427  12
   5  20  -2 177.823 32.1578   5
   5  20  -2 114.091 53.1300  12
   5  20  -1 444.213 78.3633  12
   5  20  -1 386.451 47.7908   5
  -5  20   1 330.295 46.3631   5
   5  20   0 243.031 38.5137   5
   5  20   0 282.926 68.0850  12
  -5  20   0 251.485 38.5225   5
   5  20   1 328.974 48.0889   5
  -5  20  -1 401.274 47.2206   5
  -5  20  -2 104.351 27.0701   5
   5  20   2 135.636 51.8913  12
  -5  20  -3 37.8697 20.7042   5
  -5  20  -4 430.264 47.7165   5
   5  21  -3 139.735 24.5579   5
   5  21  -2 61.9588 20.9904   5
   5  21  -2 34.4306 42.6711  12
   5  21  -1 22.8963 19.1644   5
   5  21  -1 5.58273 47.4671  12
  -5  21   0 129.961 27.6360   5
   5  21   0 92.6697 25.7656   5
   5  21   0 176.803 55.5667  12
  -5  21  -1 20.6931 19.0920   5
  -5  21  -2 46.9733 19.4313   5
   5  21   2 9.22142 39.0905  12
  -5  21  -3 222.240 30.5402   5
   5  22   0 1111.49 112.504  12
   6   0   0 1990.44 158.463   6
   6   0   1 83.7447 17.9862   6
   6   0  -1 82.9308 15.4592   6
   6   0  -3 11555.1 897.902   7
   6   0  -4 3204.48 267.611   7
   6   0   5 1118.50 100.576   4
   6   0  -5 1267.45 115.892   7
   6   0   6 3508.02 304.866   4
   6   0   6 3725.22 301.531  10
  -6   0   6 4146.25 301.427   8
  -6   0  -6 3640.54 324.072   7
   6   0   6 3912.27 337.025   1
  -6   0   6 3994.47 333.937   1
   6   0   7 1962.25 172.623   4
  -6   0   7 1969.17 165.360   9
   6   0   7 1975.52 168.379  10
  -6   0   7 2182.48 168.249   8
   6   0   7 2063.97 204.651   1
  -6   0   7 2198.78 203.490   1
   6   0   8 1601.62 137.586  10
  -6   0   8 1427.98 131.954   9
  -6   0   8 1746.09 135.040   8
  -6   0   8 1871.03 175.087   1
   6   0   8 1576.85 173.326   1
  -6   0   9 113.413 21.5187   8
  -6   0   9 109.665 23.0074  10
  -6   0  10 113.027 22.0437  10
  -6   0  11 3.09820 12.0825  10
   6   1 -11 876.330 75.1844   5
  -6   1  11 530.272 56.6356  10
  -6   1  10 465.379 49.1030  10
  -6   1   9 63.8732 19.6412  10
  -6   1   9 55.0090 18.0590   8
   6  -1   8 73.8152 22.8732  10
  -6   1   8 113.382 22.5655   8
  -6   1   8 106.479 21.1901   9
   6  -1   8 101.678 47.2523   1
  -6   1   8 113.485 44.7116   1
   6  -1   7 529.987 60.9448   4
  -6   1   7 467.244 77.0370   1
   6  -1   7 568.013 88.5869   1
  -6   1   7 536.978 54.2451   9
   6  -1   7 560.020 57.2108  10
  -6   1   7 674.015 58.4182   8
   6  -1   6 68.3180 24.2947   4
   6   1  -6 74.6978 31.9133   7
  -6   1   6 125.023 38.6327   1
   6  -1   6 100.034 18.1007  10
  -6  -1  -6 43.3371 25.2332   7
  -6   1   6 102.855 18.5434   8
  -6   1   6 72.5853 16.9558   9
   6  -1   5 82.0860 20.7246   4
   6   1  -5 90.7360 32.8398   7
  -6   1   5 126.425 33.9960   1
  -6   1   4 3361.21 261.920   1
   6   1  -4 2781.13 254.981   7
  -6   1   3 3265.32 255.299   1
   6   1  -3 2880.35 253.542   7
  -6   1   2 4204.82 317.597   1
   6   1  -2 3746.73 321.852   7
   6   1  -1 5364.29 421.706   6
  -6   1   1 5528.94 419.864   1
   6   1   0 6374.74 488.473   6
   6  -1   0 6297.14 488.950   6
   6  -1  -1 5575.74 425.116   6
   6   1   1 5459.91 423.412   1
   6   1   2 3509.96 279.490   1
   6   1   4 2726.15 237.163   1
   6   1   5 165.413 41.4599   1
   6   1   6 106.253 19.5399  10
  -6   1  -6 112.789 36.0763   7
  -6  -1   6 141.655 20.8341   8
   6   1   6 101.767 38.8759   1
  -6  -1   7 474.215 49.9983   9
   6   1   7 528.629 53.5136  10
  -6  -1   7 547.206 52.0466   8
  -6  -1   7 573.980 82.4321   1
   6   1   7 550.703 81.0789   1
   6   1   8 95.8035 25.3483  10
  -6  -1   8 184.032 25.4106   8
   6   1   8 118.369 48.3251   1
  -6  -1   8 164.603 48.3971   1
  -6  -1   9 25.5900 15.8956  10
  -6  -1  10 481.503 49.0948  10
  -6   1 -11 736.840 70.7924   5
  -6  -1  11 518.693 52.0481  10
  -6   2  11 12.3397 12.8612  10
  -6   2  10 78.7648 19.6730  10
  -6   2   9 133.018 25.1673  10
  -6   2   9 129.084 23.4172   8
   6  -2   8 46.4197 19.2195  10
  -6   2   8 108.566 21.4342   9
  -6   2   8 115.379 22.6811   8
  -6   2   8 82.4391 40.6536   1
   6  -2   8 25.1779 44.3375   1
   6  -2   7 872.779 85.8784   4
   6  -2   7 864.098 81.3892  10
  -6   2   7 951.020 82.7571   8
  -6   2   7 925.017 80.0933   9
   6   2  -7 860.376 103.244   7
  -6   2   7 754.903 105.347   1
   6  -2   6 958.113 97.5617   4
   6  -2   6 1085.37 94.7187  10
   6   2  -6 1082.19 117.664   7
  -6   2   6 1170.94 95.3799   8
  -6   2   6 1139.32 93.9789   9
  -6   2   6 1154.91 121.936   1
  -6   2   5 932.266 95.7335   1
   6   2  -5 752.388 90.7771   7
   6  -2   5 784.248 74.0912   4
  -6   2   4 4355.89 346.074   1
   6   2  -4 4004.49 343.845   7
  -6   2   3 1055.74 95.8055   1
   6   2  -3 925.803 98.0340   7
  -6   2   2 1402.06 117.645   1
   6   2  -2 1381.31 125.768   7
  -6   2   1 181.673 24.4353   2
   6  -2   0 3809.50 297.723   6
   6   2   1 138.016 22.2505   6
   6  -2  -1 105.988 17.7266   6
   6   2   1 154.128 20.9154   2
   6  -2  -2 1563.62 125.346   6
   6   2   2 1527.87 129.157   1
   6   2   3 1057.99 100.332   1
   6   2   4 4065.20 337.284   1
   6   2   5 779.552 74.7411   4
   6   2   5 957.188 98.8092   1
   6   2   6 1027.84 99.5375   4
   6   2   6 1024.55 96.0675  10
  -6   2  -6 1166.13 126.609   7
  -6  -2   6 1312.51 97.7085   8
   6   2   6 1086.74 123.440   1
   6   2   7 770.362 78.4839   4
   6   2   7 768.297 74.3697  10
  -6  -2   7 693.722 69.6682   9
  -6  -2   7 896.749 72.5283   8
  -6   2  -7 838.970 108.142   7
   6   2   7 1009.35 110.648   1
  -6  -2   7 801.294 104.499   1
   6   2   8 60.8508 19.2110  10
  -6  -2   8 63.2003 16.8677   8
   6   2   8 38.9298 37.8179   1
  -6  -2   8 38.6150 39.9065   1
  -6  -2   9 125.424 22.7879  10
  -6  -2  10 50.9025 15.1189  10
  -6   2 -11 21.8363 29.1356   5
  -6  -2  11 10.0976 9.71513  10
  -6   3  11 82.2653 18.5490  10
  -6   3  10 300.532 36.9502  10
  -6   3   9 172.495 28.2424  10
  -6   3   9 161.071 27.3133   9
  -6   3   9 194.852 28.9061   8
  -6   3   8 533.613 58.0225   9
  -6   3   8 724.958 62.3700   8
   6  -3   8 494.539 94.4788   1
  -6   3   8 582.682 87.2148   1
   6  -3   7 772.304 80.3973   4
   6  -3   7 828.452 77.3678  10
   6   3  -7 749.642 101.176   7
  -6   3   7 904.804 78.7951   8
  -6   3   7 834.430 75.7637   9
  -6   3   7 798.479 104.354   1
   6  -3   6 529.707 57.3888   4
   6  -3   6 551.658 53.3126  10
  -6   3   6 501.338 51.6780   9
   6   3  -6 593.701 78.5317   7
  -6   3   6 611.763 54.4995   8
  -6   3   6 553.698 79.3813   1
  -6   3   5 543.461 69.6603   1
   6  -3   5 459.223 49.4703   4
   6   3  -5 476.197 68.6478   7
   6   3  -4 274.894 48.9410   7
  -6   3   4 218.379 40.5961   1
  -6   3   3 1245.26 109.370   1
   6   3  -3 1080.07 112.360   7
   6   3  -2 96.7542 27.7365   7
  -6   3   2 86.4283 18.7256   1
  -6   3   1 2607.12 206.098   2
   6   3  -1 2342.52 204.065   7
   6   3   0 147.476 20.7800   6
   6  -3  -1 2018.40 167.059   6
   6   3   1 2147.47 171.626   6
   6   3   1 2289.50 177.202   2
   6  -3  -2 16.4603 10.1493   6
   6   3   2 25.0717 13.8879   1
   6  -3  -3 944.127 81.1015   6
   6   3   3 943.777 91.2443   1
   6   3   4 209.806 40.4598   1
   6   3   5 485.327 50.1716   4
   6   3   5 507.215 69.0914   1
   6   3   6 538.748 56.5559   4
   6   3   6 507.497 52.9353  10
   6   3   6 537.246 52.3319   9
  -6   3  -6 478.470 78.1423   7
  -6  -3   6 599.702 52.1136   8
   6   3   6 625.518 81.2813   1
   6   3   7 673.025 72.4328   4
   6   3   7 653.771 68.4774  10
  -6   3  -7 771.355 107.446   7
  -6  -3   7 793.976 66.4237   8
   6   3   7 719.466 97.8871   1
   6   3   8 615.368 69.1722  10
  -6  -3   8 763.475 65.5453   8
  -6  -3   8 777.983 106.563   1
   6   3   8 656.827 101.061   1
  -6  -3   9 255.754 32.1347  10
  -6  -3  10 239.439 28.9313  10
  -6   3 -11 112.304 35.3889   5
  -6  -3  11 53.3250 11.9481  10
   6   4 -10 241.909 44.0914   5
  -6   4   9 155.025 26.4808   8
  -6   4   9 127.415 25.6691   9
  -6   4   8 24.7959 16.5775   8
  -6   4   8 21.4634 18.1297   9
   6  -4   7 652.899 67.9204   4
   6  -4   7 639.454 63.5954  10
  -6   4   7 750.590 66.3541   8
   6   4  -7 611.342 91.0049   7
  -6   4   7 581.161 61.5271   9
  -6   4   7 699.309 93.9072   1
   6  -4   6 278.818 40.0201   4
   6  -4   6 355.478 37.5423  10
   6   4  -6 455.155 68.3110   7
  -6   4   6 401.896 38.8938   8
  -6   4   6 273.899 35.4291   9
  -6   4   6 356.243 62.6782   1
  -6   4   5 762.596 88.7745   1
   6   4  -5 805.969 91.8576   7
   6  -4   5 667.839 66.9909   4
  -6   4   4 614.026 72.0722   1
   6   4  -4 565.050 74.8904   7
   6   4  -3 158.990 39.1031   7
  -6   4   3 157.895 30.6864   1
  -6   4   2 833.443 78.7899   2
   6   4  -2 731.676 80.4165   7
  -6   4   1 250.747 48.5941   2
   6   4   0 77.2667 15.3003   6
   6   4   1 273.607 32.2033   6
   6  -4  -1 272.192 29.1247   6
   6   4   1 215.209 45.1642   2
   6  -4  -2 802.726 69.9749   6
   6   4   2 961.885 84.4697   2
   6  -4  -3 148.945 20.2647   6
   6   4   3 101.703 27.8537   1
   6  -4  -4 376.527 37.8971   6
   6   4   4 344.830 52.6124   1
   6   4   5 612.699 59.7699   4
   6   4   5 637.464 80.3521   1
   6   4   6 234.977 35.1684   4
   6   4   6 276.976 31.1663   9
  -6   4  -6 278.261 60.1779   7
   6   4   6 267.531 53.9027   1
   6   4   7 695.174 72.9023   4
  -6  -4   7 756.882 65.5732   8
  -6   4  -7 809.737 111.823   7
   6   4   7 602.380 94.6629   1
  -6  -4   8 12.2296 35.3759   1
  -6  -4   9 164.904 23.7011  10
  -6   4 -10 264.657 43.8655   5
  -6  -4  10 158.422 22.4212  10
  -6   4 -11 88.5761 40.5510   5
   6   5 -10 76.3840 35.1163   5
  -6   5  10 37.3323 16.3702  10
  -6   5   9 199.181 29.8899   9
  -6   5   9 164.117 28.0127  10
  -6   5   9 202.567 29.5936   8
  -6   5   8 1155.85 105.241   9
  -6   5   8 1201.70 106.419  10
  -6   5   8 1229.10 106.400   8
   6   5  -7 254.491 62.4474   7
  -6   5   7 226.833 31.8711   9
   6  -5   7 224.093 35.9935   4
   6   5  -6 610.981 89.3806   7
  -6   5   6 626.055 60.2303   9
   6  -5   6 663.371 65.4612   4
  -6   5   5 1724.47 169.824   1
   6   5  -5 1848.22 173.455   7
   6  -5   5 1743.71 147.587   4
   6   5  -4 477.755 67.0473   7
  -6   5   3 515.858 61.2932   2
   6   5  -3 374.383 59.5385   7
  -6   5   2 83.4958 29.7271   2
  -6   5   1 472.913 75.4828   2
   6   5  -1 455.901 55.9731   7
   6   5   0 3497.09 274.699   6
   6   5   1 197.925 27.4173   6
   6   5   1 196.478 60.5329   2
   6  -5  -2 70.8072 14.7929   6
   6   5   2 56.4877 26.1397   2
   6  -5  -3 459.518 41.4392   6
   6   5   5 1434.23 123.274   4
   6   5   5 1539.89 147.507   1
   6   5   6 691.463 66.3223   4
   6   5   6 610.674 60.8202   9
   6   5   6 746.435 65.5530  10
  -6   5  -6 644.962 93.7630   7
   6   5   6 626.397 87.9025   1
   6   5   7 363.017 43.4970   4
  -6   5  -7 332.728 73.6451   7
   6   5   7 304.973 40.2865  10
  -6   5  -8 1279.65 164.561   7
  -6  -5   9 137.820 21.4121  10
  -6   5 -10 5.43768 31.1032   5
  -6  -5  10 13.4976 10.0228  10
   6   6 -10 147.067 45.4079   5
  -6   6  10 113.822 21.7941  10
   6   6  -9 67.9815 35.2337   5
  -6   6   9 40.6111 17.4622  10
  -6   6   9 20.7214 19.4643   9
   6   6  -8 216.216 63.3074   7
  -6   6   8 201.668 62.9614   2
  -6   6   8 204.355 30.9463  10
  -6   6   8 220.685 32.9650   9
   6   6  -7 42.6833 39.8126   7
  -6   6   7 9.81374 18.0286   9
  -6   6   7 48.9906 41.4130   2
   6   6  -6 1369.41 152.169   7
  -6   6   6 1478.33 117.339   8
  -6   6   6 1228.18 115.099   9
   6  -6   6 1404.20 121.090   4
   6   6  -5 1378.31 147.363   7
   6  -6   5 1415.60 121.809   4
  -6   6   4 1879.07 169.251   2
   6   6  -4 1513.88 158.871   7
  -6   6   3 3231.02 269.787   2
   6   6  -3 2988.44 265.115   7
  -6   6   2 566.961 75.1696   2
   6   6  -1 23.0423 22.4465   7
  -6   6   1 31.5286 45.8530   2
   6   6   0 1498.53 124.033   6
   6   6   1 55.3978 19.7911   6
   6   6   1 16.0462 50.8017   2
   6   6   2 390.948 60.4257   2
   6   6   3 3114.51 268.120   2
   6   6   4 1756.76 171.168   2
   6   6   5 1217.33 106.116   4
   6   6   5 1238.58 105.490  10
   6   6   6 1220.34 109.823   4
  -6   6  -6 1217.95 142.391   7
   6   6   6 1208.67 105.113   9
   6   6   6 1339.81 110.138  10
   6   6   7 7.11598 39.2931   2
   6   6   7 33.4067 17.1084  10
  -6   6  -7-6.61546 43.9748   7
   6   6   7 32.4104 15.6660   9
  -6  -6   8 221.656 28.4869  10
  -6   6  -8 349.468 78.6995   7
   6   6   8 232.090 70.6882   2
  -6  -6   9 20.2986 11.1208  10
  -6   6  -9 47.8320 36.2900   5
  -6   6 -10 165.981 45.7952   5
  -6   7  10 407.979 41.8084  10
   6   7 -10 294.241 64.0057   5
  -6   7   9 578.876 55.4165  10
   6   7  -9 713.731 84.0539   5
  -6   7   8 845.090 135.285   2
  -6   7   8 936.201 88.3357  10
  -6   7   8 937.458 88.5928   8
  -6   7   8 1020.47 90.9609   9
   6   7  -8 805.613 127.772   7
   6   7  -7 71.1141 49.8877   7
  -6   7   7 7.64342 50.6078   2
  -6   7   7 113.881 24.0000   8
  -6   7   7 123.531 26.2771   9
   6   7  -6 153.145 52.7529   7
  -6   7   6 173.427 27.6483   8
   6  -7   6 197.374 32.6291   4
  -6   7   6 207.905 60.1856   2
  -6   7   5 503.682 82.8726   2
   6   7  -5 468.243 75.7988   7
   6  -7   5 495.786 53.5379   4
  -6   7   4 561.916 83.1737   2
   6   7  -4 560.851 77.8450   7
  -6   7   3 697.765 92.2921   2
  -6   7   2 729.863 105.495   2
   6   7  -2 869.307 90.5672   7
  -6   7   1 1519.79 180.048   2
   6   7  -1 1645.59 147.326   7
   6   7   0 3743.23 295.259   6
   6   7   1 2125.38 173.200   6
   6   7   1 1961.15 222.491   2
   6   7   2 995.492 122.438   2
   6   7   3 472.183 71.2639   2
   6   7   4 497.738 75.2216   2
   6   7   5 392.539 45.3011  10
   6   7   5 453.332 43.0261   9
   6   7   5 475.711 47.1823   4
   6   7   5 567.706 83.6995   2
   6   7   6 202.071 30.4582   4
   6   7   6 198.473 26.1938   9
   6   7   6 191.909 29.9340  10
  -6   7  -6 237.640 60.7053   7
   6   7   6 196.052 65.7948   2
  -6   7  -7 33.6720 40.8534   7
   6   7   7 52.0775 17.5821   9
   6   7   7 53.2670 48.8993   2
  -6   7  -8 650.408 94.3036   5
  -6   7  -8 850.539 125.182   7
   6   7   8 767.087 122.079   2
  -6   7  -9 423.725 72.2009   5
  -6   7 -10 252.512 58.0297   5
   6   8 -10-7.46023 43.1487   5
   6   8  -9 75.5449 54.5816   5
  -6   8   9 32.2859 16.6295   8
  -6   8   9 44.0777 21.5618   9
  -6   8   9 29.6605 14.4642  10
   6   8  -8 861.067 103.830   5
  -6   8   8 647.935 64.2946  10
  -6   8   8 667.587 65.5168   8
  -6   8   8 639.069 66.5835   9
   6   8  -7 2787.06 213.150   5
  -6   8   7 2001.08 171.598  10
  -6   8   7 2221.22 174.360   8
  -6   8   7 1867.86 173.301   9
   6   8  -7 2175.76 222.824   7
  -6   8   7 2075.44 236.452   2
  -6   8   6 2180.52 239.051   2
  -6   8   6 2048.06 180.874   8
   6   8  -6 2076.59 220.875   7
  -6   8   5 420.820 92.3163   2
   6   8  -5 539.889 88.4222   7
  -6   8   4 1321.50 154.938   2
   6   8  -4 1366.22 143.036   7
  -6   8   3 1148.83 138.604   2
  -6   8   2 1607.38 199.944   2
   6   8  -2 2077.90 177.130   7
   6   8  -1 268.311 45.6375   7
   6   8   0 1140.58 99.1143   6
   6   8   1 165.172 29.7544   6
   6   8   2 1613.21 182.633   2
   6   8   3 1020.81 125.319   2
   6   8   4 1170.67 139.512   2
   6   8   5 501.373 53.1923   4
  -6   8  -5 476.902 75.4621   5
   6   8   5 578.258 50.5275   9
  -6   8  -5 504.604 83.6121   7
   6   8   5 577.080 93.7175   2
  -6   8  -6 1224.23 159.161   5
   6   8   6 1720.24 135.895   9
  -6   8  -6 1770.65 183.377   7
   6   8   6 1862.30 198.644   2
   6   8   7 1759.67 138.035   9
  -6   8  -7 1738.82 189.070   7
   6   8   7 2140.51 218.036   2
  -6   8  -8 348.567 78.1519   5
  -6   8  -9 26.9990 48.4127   5
  -6   8 -10 18.7287 43.1021   5
   6   9  -9 143.288 65.4854   5
  -6   9   9 271.885 35.4146   9
   6   9  -8 440.960 93.6583   5
  -6   9   8 525.932 52.6038  10
  -6   9   8 504.673 52.9951   8
  -6   9   8 533.547 57.1849   9
   6   9  -7 58.3240 61.2785   5
   6   9  -7 90.1317 52.9957   7
  -6   9   7 102.980 64.9876   2
  -6   9   7 72.2346 17.5994  10
  -6   9   7 71.8927 20.5233   8
  -6   9   7 75.2870 24.4450   9
   6   9  -6 11.1141 55.6705   5
   6   9  -6 12.7429 41.5779   7
  -6   9   6 7.16005 12.5968  10
  -6   9   6 15.6175 16.0641   8
  -6   9   6 9.90976 54.6500   2
  -6   9   5 429.970 101.514   2
   6   9  -5 560.503 87.2453   7
  -6   9   5 526.011 52.6272   8
   6   9  -5 647.689 97.1588   5
  -6   9   4 683.488 114.077   2
   6   9  -4 737.150 107.033   5
  -6   9   3 553.124 116.337   2
   6   9  -3 1100.78 108.509   7
  -6   9   2 1990.82 259.569   2
   6   9  -2 3042.93 237.856   7
   6   9  -1 4373.70 360.548   7
   6   9   0 1.28023 15.9427   6
   6   9   1 5349.19 421.059   6
   6   9   2 1797.73 208.324   2
   6   9   3 688.124 111.261   2
  -6   9  -4 277.835 77.8328   5
   6   9   4 606.719 98.6870   2
  -6   9  -5 344.802 80.0841   5
   6   9   5 437.205 41.3739   9
  -6   9  -5 355.821 70.2297   7
   6   9   5 468.609 97.6517   2
  -6   9  -6 11.7444 56.5707   5
  -6   9  -6 24.4499 36.9539   7
   6   9   6 18.8258 14.4846   9
   6   9   6 37.5680 54.3384   2
  -6   9  -7 73.6659 65.7774   5
  -6   9  -7 81.1858 48.2292   7
   6   9   7 69.0313 18.0646   9
   6   9   7 91.8665 66.8202   2
  -6   9  -8 316.741 86.3713   5
  -6   9  -9 75.4883 59.4705   5
  -6   9 -10 48.2932 44.0001   5
   6  10  -9 14.3613 54.7548   5
  -6  10   9 89.9181 22.1534   9
   6  10  -8 58.2083 73.6372   5
  -6  10   8 265.534 31.9190   8
  -6  10   7 768.691 67.3946  10
  -6  10   7 803.801 69.5109   8
   6  10  -7 846.911 119.848   7
   6  10  -6 2043.95 241.438   5
  -6  10   6 1829.63 265.803   2
  -6  10   6 2174.45 184.786  10
   6  10  -6 2307.84 234.813   7
  -6  10   6 2557.53 189.418   8
   6  10  -5 154.102 56.0198   7
  -6  10   5 145.502 79.0051   2
  -6  10   5 177.478 25.2757   8
   6  10  -5 6.86001 70.2919   5
   6  10  -4 354.359 92.4421   5
  -6  10   4 460.171 109.016   2
  -6  10   3 976.586 79.3474   5
   6  10  -3 1049.16 105.267   7
  -6  10   2 655.414 128.596   2
   6  10  -2 981.177 103.992   7
   6  10  -1 129.114 24.5626   6
   6  10  -1 151.926 39.7730   7
  -6  10   1 110.138 25.0239   7
   6  10   0 325.111 40.0848   6
   6  10   1 156.349 27.2296   6
   6  10   2 935.690 143.616   2
   6  10   3 1037.66 93.6208   5
   6  10   3 643.388 135.440   2
  -6  10  -4 491.085 74.4188   7
   6  10   4 469.612 104.473   2
  -6  10  -5 41.2314 68.8800   5
   6  10   5 117.624 18.8207   9
   6  10   5 191.736 83.5341   2
   6  10   6 2039.59 149.852   9
  -6  10  -6 1853.32 197.545   7
   6  10   6 1729.18 237.609   2
   6  10   7 604.103 52.4517   9
  -6  10  -7 578.905 97.4332   7
   6  10   7 598.541 133.129   2
  -6  10  -8 117.688 75.9150   5
  -6  10  -9 24.9095 54.6305   5
   6  11  -9 53.9401 44.4997   5
  -6  11   8 478.928 47.6276   8
  -6  11   7 561.472 52.0899   8
   6  11  -7 131.148 99.2747   5
  -6  11   6 614.951 54.8027   8
   6  11  -6 678.869 105.207   7
  -6  11   5 338.937 128.663   2
   6  11  -5 254.877 106.546   5
  -6  11   5 662.584 58.4502   8
  -6  11   4 190.856 92.9391   2
   6  11  -4 244.592 61.2030   7
   6  11  -4 27.3576 71.4507   5
  -6  11   4 233.701 28.3120   8
  -6  11   3 418.706 116.334   2
  -6  11   3 390.684 61.7289  12
   6  11  -3 543.097 68.1936  12
  -6  11   3 682.836 64.6009   5
   6  11  -3 578.285 96.3515   5
   6  11  -3 714.391 88.1914   7
   6  11  -2 834.460 95.4898  12
  -6  11   2 764.988 88.4161  12
  -6  11   2 1128.12 90.9173   5
   6  11  -2 854.258 105.207   5
   6  11  -2 1084.84 112.483   7
   6  11  -1 235.330 50.1782  12
  -6  11   1 272.639 44.1396  12
   6  11  -1 315.811 54.7392   7
   6  11  -1 397.865 42.7212   6
   6  11   0 314.905 37.3595   6
  -6  11   0 235.852 42.7738   7
   6  11   1 182.975 45.6212  12
  -6  11  -1 229.212 40.5451  12
  -6  11  -1 257.849 46.7017   7
  -6  11  -2 742.863 84.4754  12
   6  11   2 708.991 83.8720  12
   6  11   2 836.172 81.4867   5
  -6  11  -2 868.480 95.2502   5
  -6  11  -2 995.543 101.733   7
   6  11   3 376.466 118.070   2
  -6  11  -3 499.770 74.3987  12
   6  11   3 601.630 72.3156  12
   6  11   3 741.829 73.0986   5
  -6  11  -3 818.729 101.201   5
  -6  11  -3 748.876 90.7074   7
   6  11   4 115.905 37.4174  12
  -6  11  -4 172.556 50.4930   7
   6  11   4 85.3035 84.2372   2
   6  11   5 384.642 37.0922   9
   6  11   5 363.348 116.962   2
   6  11   6 533.821 46.4961   9
  -6  11  -6 366.483 79.4674   7
   6  11   6 344.124 121.064   2
  -6  11  -7 53.1415 91.4579   5
  -6  11  -8 47.4184 71.4542   5
  -6  11  -9 7.87144 42.3098   5
   6  12  -9 57.0786 32.6086   5
   6  12  -8 221.985 71.4539   5
   6  12  -7 51.5081 80.5707   5
  -6  12   7 124.799 26.9410   9
  -6  12   7 107.203 19.8233   8
  -6  12   6 230.189 113.619   2
   6  12  -6 184.019 95.3343   5
  -6  12   6 296.417 35.4822   8
  -6  12   6 370.355 43.3702   9
   6  12  -6 395.042 82.3790   7
   6  12  -5 496.788 113.215   5
  -6  12   5 632.399 57.5147   8
   6  12  -4 96.0424 48.9848   7
   6  12  -4 167.048 72.9087   5
  -6  12   4-14.0183 73.6320   2
   6  12  -3 281.315 66.9786   5
  -6  12   3 201.403 45.6580  12
   6  12  -3 234.267 51.2531  12
   6  12  -3 274.325 66.2281   7
  -6  12   3 348.898 46.1328   5
   6  12  -2 1492.57 144.358  12
  -6  12   2 1186.36 135.029  12
  -6  12   2 1934.55 140.687   5
   6  12  -2 1514.18 151.349   5
   6  12  -2 1764.32 162.512   7
  -6  12   1 67.3324 22.8691   5
   6  12  -1 50.2606 30.9717   5
  -6  12   1 44.2867 30.8800  12
   6  12  -1 2.74913 37.1255  12
   6  12  -1 34.6237 31.9923   7
   6  12  -1 39.1800 18.9606   6
  -6  12   0 586.942 71.8313  12
   6  12   0 658.170 82.4341  12
  -6  12   0 668.819 71.5782   5
   6  12   0 678.562 74.1522   5
  -6  12   0 724.851 79.2769   7
   6  12   1 2.66823 36.5262  12
  -6  12  -1 29.3571 29.3005  12
   6  12   1 23.4530 20.7683   5
  -6  12  -1 34.5269 26.0356   5
  -6  12  -1 14.5562 25.8307   7
  -6  12  -2 1418.18 138.022  12
   6  12   2 1363.16 139.740  12
   6  12   2 1629.10 137.030   5
  -6  12  -2 1497.15 144.773   5
  -6  12  -2 1690.32 158.606   7
   6  12   3 247.085 51.1998  12
  -6  12  -3 229.970 53.6646  12
   6  12   3 369.091 48.2974   5
  -6  12  -3 333.799 62.4200   5
  -6  12  -3 340.922 65.0515   7
   6  12   4 77.1993 35.7826  12
  -6  12  -4 102.528 62.5428   5
  -6  12  -4 95.5150 43.7312   7
   6  12   4 53.7192 76.1507   2
  -6  12  -5 424.963 103.992   5
  -6  12  -5 382.358 76.3913   7
   6  12   5 210.637 117.547   2
   6  12   6 334.347 35.5806   9
  -6  12  -6 405.974 114.066   5
   6  12   6 269.704 123.239   2
  -6  12  -7 62.5495 81.9402   5
  -6  12  -8 199.660 70.1600   5
  -6  12  -9 16.3270 32.2059   5
  -6  13   9 189.114 23.6558   9
   6  13  -8 261.714 60.5188   5
  -6  13   8 362.771 39.2256   9
  -6  13   7 1827.18 151.965   9
   6  13  -7 1683.65 192.577   5
  -6  13   6 803.749 78.9756   9
   6  13  -6 964.959 138.694   5
   6  13  -5 511.925 105.269   5
   6  13  -5 706.408 105.032   7
   6  13  -4 5.67189 51.4009   5
   6  13  -4-37.0939 38.6674  12
   6  13  -4 12.7109 40.7307   7
   6  13  -3 44.2950 43.1761   5
  -6  13   3 88.7740 29.0894   5
   6  13  -3 16.7919 37.2044  12
   6  13  -3 28.3012 35.7935   7
  -6  13   2 760.764 99.0751  12
   6  13  -2 1031.22 111.654  12
   6  13  -2 1238.90 102.775   6
  -6  13   2 1202.98 101.854   5
   6  13  -2 805.990 106.282   5
   6  13  -2 1215.41 127.202   7
  -6  13   1 762.806 94.8992  12
   6  13  -1 910.840 104.980  12
  -6  13   1 1051.50 94.3075   5
   6  13  -1 1038.17 101.525   5
  -6  13   0 701.691 80.7704  12
   6  13   0 720.460 89.9992  12
  -6  13   0 689.736 75.2877   5
   6  13   0 745.010 79.2036   5
  -6  13  -1 918.768 102.508  12
   6  13   1 983.318 109.728  12
  -6  13  -1 1100.39 102.526   5
   6  13   1 999.348 99.3726   5
  -6  13  -1 1029.45 113.161   7
   6  13   2 876.043 103.638  12
  -6  13  -2 871.740 100.552  12
   6  13   2 1049.93 99.1061   5
  -6  13  -2 1077.31 105.602   5
  -6  13  -2 1075.65 120.464   7
  -6  13  -3 24.0036 39.5274   5
   6  13   3 31.3767 26.8763   5
  -6  13  -3 16.1631 39.3663   7
   6  13   3 45.5614 38.7454  12
  -6  13  -4-26.5127 51.4835   5
  -6  13  -4 5.88567 32.4588   7
   6  13   4-7.60030 34.5068  12
   6  13   5 278.531 124.636   2
  -6  13  -5 413.375 82.5720   7
  -6  13  -5 494.083 101.950   5
  -6  13  -6 633.750 118.785   5
  -6  13  -7 1904.82 206.245   5
  -6  13  -8 327.846 62.8036   5
  -6  13  -9 124.916 28.9517   5
  -6  14   8 9.39654 13.4813   9
   6  14  -8 10.1866 26.2816   5
  -6  14   7 347.656 39.9535   9
   6  14  -7 307.129 66.3726   5
  -6  14   6 111.828 24.3579   9
   6  14  -6 21.4852 52.6647   5
   6  14  -5 592.925 99.0546   5
   6  14  -5 510.866 97.4994   7
   6  14  -4 1691.84 166.965  12
   6  14  -4 1852.70 187.674   5
   6  14  -4 2119.62 205.779   7
   6  14  -3 1147.75 131.650  12
   6  14  -3 1372.97 129.182   6
  -6  14   3 1508.42 130.233   5
   6  14  -3 1244.09 139.925   5
   6  14  -3 1535.13 161.522   7
  -6  14   2 386.338 65.0118  12
   6  14  -2 467.138 75.3431  12
   6  14  -2 349.135 61.8040   5
  -6  14   2 570.741 60.4726   5
   6  14  -2 505.900 81.3003   7
   6  14  -1 121.015 35.8878   5
  -6  14   1 133.783 31.5484   5
   6  14  -1 132.278 51.9787  12
   6  14   0 216.290 43.2459   5
  -6  14   0 378.880 57.9971  12
   6  14   0 255.963 63.5861  12
  -6  14   0 319.654 44.0191   5
   6  14   1 155.052 55.9989  12
  -6  14  -1 143.851 45.9311  12
  -6  14  -1 133.045 33.1921   5
   6  14   1 158.488 35.2889   5
  -6  14  -1 151.771 42.6867   7
   6  14   2 373.916 66.4055  12
  -6  14  -2 377.561 66.5243  12
   6  14   2 434.316 55.2025   5
  -6  14  -2 363.302 57.0611   5
  -6  14  -2 393.043 70.9125   7
   6  14   3 904.821 102.329  12
   6  14   3 945.579 98.9750   5
  -6  14  -3 976.231 107.629   5
  -6  14  -3 829.364 119.999   7
  -6  14  -4 1656.25 164.590   5
  -6  14  -4 1529.61 172.323   7
   6  14   4 1477.35 146.138  12
  -6  14  -5 578.783 98.7145   7
  -6  14  -5 713.916 103.973   5
  -6  14  -6 149.581 61.7673   5
  -6  14  -7 418.398 74.6991   5
  -6  14  -8 2.61380 30.0612   5
   6  15  -8 450.894 57.6216   5
  -6  15   8 615.820 50.8817   9
   6  15  -7 1257.39 131.777   5
  -6  15   7 1395.96 114.296   9
   6  15  -6 521.568 82.6671   5
  -6  15   6 606.348 58.3638   9
   6  15  -5 181.801 57.1788   5
   6  15  -4 50.0955 41.6430   5
   6  15  -4 19.4790 39.4228  12
   6  15  -4 78.5090 48.5244   7
   6  15  -3 50.8760 38.7347   5
  -6  15   3 68.1390 30.5540   5
   6  15  -3 22.1077 43.1824  12
   6  15  -3 42.1981 45.3747   7
   6  15  -2 607.236 88.8773  12
  -6  15   2 500.135 77.6250  12
   6  15  -2 708.129 81.8886   5
  -6  15   2 767.038 75.3508   5
   6  15  -1 1581.41 158.238  12
  -6  15   1 1713.18 141.687   5
   6  15  -1 1327.71 140.643   5
  -6  15   0 631.270 85.2614  12
   6  15   0 831.950 99.8189  12
   6  15   0 646.288 77.1963   5
  -6  15   0 720.642 75.9961   5
  -6  15  -1 1280.88 139.640  12
   6  15   1 1519.03 136.003   5
  -6  15  -1 1500.30 135.147   5
  -6  15  -2 638.090 87.2902  12
   6  15   2 743.263 92.6473  12
  -6  15  -2 747.426 82.9145   5
   6  15   2 685.741 78.8200   5
  -6  15  -2 685.163 96.8567   7
  -6  15  -3 67.0877 35.3208   5
   6  15   3 46.3117 31.7710   5
   6  15   3 52.1159 45.3773  12
  -6  15  -3 45.3809 37.2250   7
  -6  15  -4 15.8593 38.1386   5
   6  15   4 101.788 41.9287  12
  -6  15  -4 72.2802 46.6023   7
  -6  15  -5 266.335 62.1109   5
  -6  15  -6 841.343 104.636   5
  -6  15  -7 1173.70 120.310   5
  -6  15  -8 370.381 46.1232   5
   6  16  -7 317.000 45.3973   5
   6  16  -6 508.862 73.8065   5
  -6  16   6 637.341 57.6488   9
   6  16  -5 1184.30 128.973   5
  -6  16   5 1269.23 107.308   9
   6  16  -4 2022.89 169.337  12
   6  16  -4 1591.69 169.245   5
   6  16  -3 664.263 87.0663  12
   6  16  -3 626.011 80.7611   5
  -6  16   3 654.030 75.3261   5
   6  16  -2 210.335 62.0586  12
   6  16  -2 157.995 41.4980   5
  -6  16   2 214.769 39.0210   5
   6  16  -1 531.775 86.5728  12
  -6  16   1 544.849 63.2067   5
   6  16  -1 483.208 63.9729   5
   6  16   0 234.495 67.1702  12
  -6  16   0 224.284 58.9039  12
  -6  16   0 318.502 44.3635   5
   6  16   0 245.019 43.4817   5
  -6  16  -1 485.540 76.8389  12
   6  16   1 569.841 65.4007   5
  -6  16  -1 464.824 62.4772   5
   6  16   2 129.788 54.3615  12
  -6  16  -2 129.974 36.6266   5
   6  16   2 122.866 36.7586   5
   6  16   3 476.068 79.0334  12
  -6  16  -3 635.928 76.4207   5
   6  16   3 678.185 77.0286   5
  -6  16  -3 562.199 90.1238   7
   6  16   4 1917.81 171.675  12
  -6  16  -4 1810.42 174.015   5
  -6  16  -5 1315.62 135.298   5
  -6  16  -6 729.377 85.3582   5
  -6  16  -7 329.890 47.3059   5
   6  17  -7 3.97945 15.7757   5
   6  17  -6 129.617 31.7019   5
   6  17  -5 187.391 41.1557   5
   6  17  -4 194.322 48.9857  12
   6  17  -4 243.597 46.7347   5
   6  17  -3 734.085 87.1432  12
   6  17  -3 583.622 76.1815   5
   6  17  -2 958.075 111.082  12
   6  17  -2 823.294 90.4784   5
  -6  17   2 817.251 88.4775   5
   6  17  -1 1516.86 155.621  12
  -6  17   1 1424.76 131.138   5
   6  17  -1 1374.77 132.953   5
   6  17   0 2106.09 186.358  12
   6  17   0 1722.83 158.500   5
  -6  17   0 1669.11 156.120   5
  -6  17  -1 1338.65 124.376   5
   6  17   1 1298.81 124.552   5
   6  17   2 955.673 115.504  12
  -6  17  -2 991.728 99.7395   5
   6  17   2 1008.43 101.960   5
   6  17   3 804.606 94.0877  12
  -6  17  -3 718.351 84.4598   5
  -6  17  -4 359.112 56.3262   5
  -6  17  -5 269.375 47.5458   5
  -6  17  -6 128.406 31.3173   5
  -6  17  -7 3.98764 16.2274   5
   6  18  -6 518.542 54.9679   5
   6  18  -5 702.772 74.7496   5
   6  18  -4 429.887 63.2683  12
   6  18  -4 444.443 57.0546   5
   6  18  -3 150.047 51.9138  12
   6  18  -3 196.570 38.0938   5
   6  18  -2 114.500 55.6514  12
   6  18  -2 122.207 32.7457   5
  -6  18   2 110.001 31.5682   5
   6  18  -1 198.378 69.3321  12
   6  18  -1 320.586 45.1527   5
  -6  18   1 231.180 40.9262   5
   6  18   0 312.569 73.5728  12
  -6  18   0 265.596 42.5859   5
   6  18   0 310.255 46.3061   5
  -6  18  -1 223.328 37.6600   5
   6  18   1 189.273 38.2498   5
   6  18   2 74.6040 52.9480  12
  -6  18  -2 49.4321 25.2538   5
   6  18   2 84.0529 31.7585   5
   6  18   3 159.188 53.3499  12
  -6  18  -3 169.032 36.2828   5
  -6  18  -4 481.386 60.1051   5
  -6  18  -5 720.883 76.3499   5
  -6  18  -6 475.479 51.8867   5
   6  19  -5 181.014 29.9668   5
   6  19  -4 42.8635 34.8175  12
   6  19  -4 65.0068 23.8657   5
   6  19  -3 166.563 49.3237  12
   6  19  -3 171.591 34.0482   5
   6  19  -2 746.087 90.3286  12
   6  19  -2 616.952 68.0208   5
  -6  19   2 579.010 67.0159   5
   6  19  -1 220.744 64.4473  12
   6  19  -1 209.884 35.7134   5
  -6  19   1 204.432 36.1295   5
   6  19   0 412.464 83.1229  12
  -6  19   0 372.429 47.8202   5
   6  19   0 326.017 47.8777   5
   6  19   1 116.555 31.1384   5
  -6  19  -1 114.949 29.4580   5
   6  19   2 778.202 94.2519  12
   6  19   2 638.409 75.1587   5
  -6  19  -2 747.464 74.8262   5
   6  19   3 200.805 52.7316  12
  -6  19  -3 215.963 36.2606   5
  -6  19  -4 78.2593 26.0725   5
  -6  19  -5 187.644 29.9763   5
   6  20  -4 169.702 27.1952   5
   6  20  -3 29.3440 38.3279  12
   6  20  -3 67.6313 21.7885   5
   6  20  -2 330.996 65.0913  12
   6  20  -2 370.139 45.8436   5
  -6  20   1 465.452 56.9949   5
   6  20  -1 544.808 58.8819   5
  -6  20   0 17.1574 21.0076   5
   6  20   0 14.6297 21.5729   5
   6  20   1 427.880 53.7903   5
  -6  20  -1 495.332 53.5610   5
   6  20   2 411.267 66.7337  12
  -6  20  -2 364.749 45.9548   5
  -6  20  -3 27.4578 19.6575   5
  -6  20  -4 159.511 27.0450   5
   6  21  -3 83.7334 19.2194   5
   6  21  -2 35.2283 39.7990  12
   6  21  -2 52.9291 19.8020   5
   6  21  -1 290.211 59.9956  12
   6  21  -1 152.738 28.3299   5
   6  21   0 263.990 61.3905  12
  -6  21   0 111.021 26.2588   5
   6  21   0 201.672 30.6553   5
  -6  21  -1 124.961 24.5544   5
   6  21   2 64.3886 42.1903  12
  -6  21  -2 55.5898 19.2860   5
  -6  21  -3 48.2039 17.5935   5
   7   0   0 11.0773 12.4075   6
   7   0   1 523.307 52.3486   6
   7   0  -1 495.871 48.5979   6
  -7   0   1 556.578 45.4252   1
   7   0   5 3551.26 299.121   4
  -7   0   5 4518.27 328.285   1
   7   0   6 1881.87 165.828   4
   7   0   6 1817.20 161.137  10
  -7   0   6 2040.66 159.732   9
  -7   0   6 2086.27 160.949   8
   7   0   6 2010.17 192.996   1
  -7   0   6 1973.80 188.946   1
   7   0   7 5.64659 21.6954   4
   7   0   7 13.2017 14.5421  10
  -7   0   7 22.8297 16.6874   8
  -7   0   7 8.56279 13.7921   9
   7   0   7 67.6828 33.3884   1
   7   0   8 280.007 42.3721   4
   7   0   8 196.085 32.2285  10
  -7   0   8 213.937 30.5296   9
  -7   0   8 287.807 33.4242   8
   7   0   8 289.086 60.2509   1
  -7   0   8 302.402 56.7276   1
  -7   0   9 233.164 31.4388  10
  -7   0   9 190.119 27.6329   8
  -7   0  10 244.727 31.7272  10
  -7   0  11 851.943 75.1757  10
  -7   1  11 172.613 24.8622  10
  -7   1  10 720.837 68.6021  10
  -7   1   9 1464.90 133.517  10
  -7   1   9 1644.99 132.247   8
   7  -1   8 3422.82 261.311   4
  -7   1   8 2687.33 249.486   9
  -7   1   8 3474.16 253.913   8
  -7   1   8 3473.20 290.258   1
   7  -1   8 3341.69 296.651   1
   7  -1   7 1453.68 129.143   4
   7  -1   7 1380.84 124.089  10
  -7   1   7 1367.09 120.686   9
  -7   1   7 1591.03 125.236   8
   7  -1   7 1424.00 157.639   1
  -7   1   7 1513.98 153.471   1
   7  -1   6 2182.77 183.718   4
   7  -1   6 2107.67 179.142  10
  -7   1   6 2284.42 179.059   8
  -7   1   6 2166.25 177.263   9
  -7   1   6 2518.82 211.046   1
  -7   1   5 2840.21 227.660   1
   7  -1   5 2374.81 202.514   4
   7   1  -5 2545.56 221.239   7
   7   1  -4 245.696 45.9316   7
  -7   1   4 279.742 45.2475   1
  -7   1   3 2850.67 221.190   1
   7   1  -3 2387.95 221.333   7
  -7   1   2 1148.33 98.7718   1
   7   1  -1 12309.2 942.982   6
   7   1   0 6407.72 505.136   6
   7  -1   0 6686.12 505.842   6
   7  -1  -1 11434.3 853.129   6
   7   1   1 10953.1 849.550   1
   7  -1  -2 1065.55 87.5481   6
   7   1   2 975.530 89.2258   1
   7   1   3 2661.21 223.256   1
   7   1   4 255.104 45.5300   1
   7   1   5 2859.63 253.642   1
   7   1   6 2207.06 185.243  10
  -7  -1   6 2314.33 183.728   8
   7   1   6 2420.47 216.855   1
   7   1   7 1458.24 129.369  10
  -7  -1   7 1492.28 125.312   9
  -7  -1   7 1589.70 127.911   8
  -7  -1   7 1454.68 157.533   1
   7   1   7 1517.78 160.425   1
   7   1   8 2568.15 236.795  10
  -7  -1   8 3091.60 234.312   8
   7   1   8 3079.94 275.479   1
  -7  -1   8 3188.38 272.690   1
  -7  -1   9 1711.89 140.407   8
  -7  -1   9 1672.31 143.392  10
  -7  -1  10 743.557 68.8604  10
  -7   1 -11 189.872 36.3821   5
  -7  -1  11 125.255 19.8321  10
  -7   2  11 292.267 33.7660  10
  -7   2  10 446.697 47.7083  10
  -7   2   9 173.582 26.8372  10
  -7   2   9 134.003 24.7647   8
  -7   2   8 134.860 23.9853   8
  -7   2   8 118.087 23.8067   9
   7  -2   8 114.253 46.7041   1
  -7   2   8 139.024 45.1794   1
   7  -2   7 1129.36 105.412   4
   7  -2   7 1106.23 100.574  10
  -7   2   7 1243.73 101.987   8
  -7   2   7 1077.43 97.5238   9
  -7   2   7 1209.48 129.534   1
   7  -2   7 1014.63 133.075   1
   7  -2   6 1415.38 126.878   4
   7  -2   6 1491.11 123.381  10
  -7   2   6 1428.54 120.796   9
   7   2  -6 1452.96 146.421   7
  -7   2   6 1585.68 151.570   1
  -7   2   5 1975.18 166.391   1
   7   2  -5 1751.01 163.740   7
   7  -2   5 1605.01 142.533   4
  -7   2   4 2058.76 167.848   1
   7   2  -4 1619.41 165.951   7
  -7   2   3 1387.17 123.172   1
   7   2  -3 1355.72 129.716   7
  -7   2   2 2500.88 210.468   1
   7   2  -2 2876.68 222.231   7
   7   2  -1 406.053 42.6623   6
  -7   2   1 522.996 47.2131   2
   7  -2   0 9.22686 14.4972   6
   7  -2  -1 393.414 39.1510   6
   7   2   1 430.946 44.1479   6
   7   2   1 415.960 41.4760   2
   7  -2  -2 2746.74 210.112   6
   7   2   2 2527.03 211.858   1
   7   2   3 966.606 92.0277   1
   7   2   4 1707.48 156.560   1
   7   2   5 1523.09 131.488   4
   7   2   5 1658.32 153.132   1
   7   2   6 1392.86 120.756   4
   7   2   6 1298.07 116.100  10
  -7  -2   6 1406.15 114.712   8
   7   2   6 1410.79 143.652   1
   7   2   7 1006.50 96.7744   4
   7   2   7 881.638 90.7116  10
  -7  -2   7 1101.65 89.8455   8
  -7   2  -7 1105.78 130.087   7
  -7  -2   7 1018.73 122.475   1
   7   2   7 1170.88 125.241   1
   7   2   8 151.488 27.8091  10
  -7  -2   8 152.956 23.6613   8
  -7  -2   8 166.970 49.9087   1
   7   2   8 124.779 48.6713   1
  -7  -2   9 150.826 24.5500  10
  -7  -2  10 484.872 48.6541  10
  -7   2 -11 307.786 46.5203   5
  -7  -2  11 197.263 24.4361  10
  -7   3  11 112.360 20.4229  10
  -7   3  10 596.012 59.2622  10
  -7   3   9 351.896 41.0146  10
  -7   3   9 299.598 37.8587   9
  -7   3   9 338.473 39.2823   8
  -7   3   8 537.249 54.2757   9
  -7   3   8 565.983 56.6913   8
   7  -3   8 413.990 85.9193   1
  -7   3   8 530.435 84.2703   1
   7  -3   7 579.571 63.9712   4
   7  -3   7 618.111 60.5390  10
  -7   3   7 627.856 61.0373   8
  -7   3   7 579.979 57.8271   9
   7   3  -7 527.783 82.4583   7
  -7   3   7 566.325 83.9957   1
   7  -3   6 554.177 59.6013   4
   7  -3   6 624.344 56.4063  10
   7   3  -6 557.658 78.5233   7
  -7   3   6 527.327 53.1589   9
  -7   3   6 572.085 79.5030   1
  -7   3   5 1924.19 157.502   1
   7   3  -5 1502.26 152.706   7
   7  -3   5 1453.40 130.402   4
  -7   3   4 2821.83 227.941   1
   7   3  -4 2412.14 228.651   7
  -7   3   3 839.836 82.1948   1
   7   3  -3 815.485 89.9992   7
   7   3  -2 1004.08 98.9731   7
  -7   3   1 1116.43 106.108   2
   7   3   0 3249.55 264.719   6
   7  -3   0 3523.18 267.194   6
   7   3   1 1050.91 94.6962   6
   7  -3  -1 1059.18 90.7092   6
   7   3   1 1210.25 102.547   2
   7  -3  -2 714.380 63.0379   6
   7  -3  -3 997.100 85.7971   6
   7   3   3 968.216 93.3711   1
   7  -3  -4 2876.90 228.620   6
   7   3   4 2774.57 242.279   1
   7   3   5 1483.56 130.783   4
   7   3   5 1774.71 155.158   1
   7   3   6 508.336 55.9000   4
   7   3   6 423.294 50.2427  10
  -7  -3   6 622.967 51.3990   8
   7   3   6 519.802 77.2033   1
   7   3   7 706.715 72.1455   4
   7   3   7 602.397 66.6699  10
  -7  -3   7 779.913 64.3990   8
  -7   3  -7 549.618 98.9752   7
   7   3   7 670.456 94.0108   1
  -7  -3   8 585.566 54.3997   8
   7   3   8 574.964 88.9118   1
  -7  -3   8 467.650 84.0365   1
  -7  -3   9 341.009 38.5851  10
  -7  -3  10 494.809 48.2217  10
  -7   3 -11 158.328 40.7707   5
  -7  -3  11 84.7460 14.0365  10
   7   4 -10 161.639 39.0285   5
  -7   4   9 233.613 30.9929   8
  -7   4   9 192.610 30.0870   9
   7  -4   8 215.236 64.4443   1
  -7   4   8 187.606 30.3731   9
  -7   4   8 213.022 31.8335   8
   7   4  -7 62.1775 38.5215   7
   7  -4   7 40.4246 23.5262   4
  -7   4   7 56.4991 20.2865   8
  -7   4   7 56.4065 19.6033   9
  -7   4   7 28.9797 30.6045   1
   7  -4   6 803.029 78.2130   4
   7  -4   6 823.945 73.8706  10
   7   4  -6 811.572 103.233   7
  -7   4   6 773.220 71.8916   9
  -7   4   6 794.127 98.1092   1
  -7   4   5 877.036 96.8582   1
   7   4  -5 863.743 99.0662   7
   7  -4   5 793.397 76.2503   4
  -7   4   4 3900.80 324.236   1
   7   4  -4 3880.87 329.136   7
   7   4  -3 534.021 69.5335   7
  -7   4   2 494.464 55.5704   2
   7   4  -2 454.763 58.9306   7
  -7   4   1 2005.01 185.941   2
   7   4   0 1816.03 147.839   6
   7   4   1 2203.75 188.512   6
   7  -4  -1 2443.33 186.376   6
   7   4   1 2253.51 209.382   2
   7  -4  -2 328.358 34.1071   6
   7   4   2 343.505 45.1923   2
   7  -4  -3 470.210 44.2652   6
   7   4   3 405.524 51.7984   1
   7  -4  -4 4257.00 328.826   6
   7   4   4 4016.88 344.802   1
   7   4   5 644.711 64.8178   4
   7   4   5 817.759 88.4792   1
   7   4   6 746.239 75.9527   4
   7   4   6 922.544 102.534   1
   7   4   7 126.961 30.0796   4
  -7   4  -7 87.9807 53.6897   7
   7   4   7 65.8596 40.2669   1
  -7  -4   8 85.2478 45.8722   1
  -7  -4   9 294.929 34.1119  10
  -7   4 -10 46.4404 31.0386   5
  -7  -4  10 87.8027 15.8878  10
   7   5 -10 241.616 49.6336   5
  -7   5  10 219.143 29.6789  10
  -7   5   9 269.360 36.6492   9
  -7   5   9 302.039 37.4447  10
  -7   5   9 283.008 37.1203   8
  -7   5   8 237.771 33.9435   8
  -7   5   8 214.060 33.0668   9
  -7   5   8 295.349 71.4348   2
  -7   5   7 461.989 50.1782   8
   7   5  -7 498.822 83.9026   7
  -7   5   7 401.453 46.4460   9
   7  -5   7 429.121 52.2264   4
   7   5  -6 611.948 89.0945   7
  -7   5   6 587.259 57.6201   9
   7  -5   6 579.921 61.6765   4
   7   5  -5 1464.78 149.146   7
   7  -5   5 1380.73 120.743   4
   7   5  -4 217.809 46.1628   7
   7   5  -3 330.761 54.4171   7
  -7   5   3 323.845 51.5177   2
  -7   5   2 716.604 79.0962   2
   7   5  -2 641.695 78.0316   7
   7   5  -1 107.272 28.8145   7
  -7   5   1 96.7699 52.9064   2
   7   5   0 1265.52 106.807   6
   7   5   1 161.378 26.5695   6
   7   5   1 143.520 58.4595   2
   7  -5  -2 977.694 81.3291   6
   7   5   2 871.024 96.2592   2
   7  -5  -3 431.705 42.5619   6
   7   5   3 591.267 64.9713   2
   7   5   5 1275.76 109.776   4
   7   5   5 1253.90 107.813  10
   7   5   6 600.217 61.4390   4
  -7   5  -6 620.702 91.3812   7
   7   5   6 573.949 58.5183  10
   7   5   6 579.084 55.1868   9
   7   5   7 357.788 45.2741   4
   7   5   7 348.019 42.9533  10
  -7   5  -7 341.315 79.2412   7
  -7   5  -8 303.461 80.3239   7
   7   5   8 263.273 71.7686   2
  -7  -5   9 297.114 33.2355  10
  -7   5 -10 170.609 44.4196   5
  -7  -5  10 162.079 20.8494  10
   7   6 -10 170.375 52.5944   5
  -7   6  10 235.509 29.9864  10
  -7   6   9 155.842 28.3763   9
  -7   6   9 170.906 27.4094  10
  -7   6   8 99.9010 50.8670   2
  -7   6   8 200.196 29.0100  10
  -7   6   8 183.883 31.0418   9
   7   6  -7 360.804 73.9153   7
  -7   6   7 291.336 74.2670   2
  -7   6   7 303.391 40.8011   9
   7  -6   7 422.956 47.1086   4
  -7   6   6 1830.07 184.727   2
   7   6  -6 1371.23 166.149   7
  -7   6   6 1606.89 136.101   8
   7  -6   6 1653.27 140.701   4
  -7   6   5 3212.11 269.525   2
   7   6  -5 2537.71 253.394   7
   7  -6   5 2811.54 228.923   4
  -7   6   4 1337.75 133.742   2
   7   6  -4 1124.75 127.257   7
  -7   6   3 1010.11 110.749   2
   7   6  -3 1052.73 110.154   7
  -7   6   2 540.395 75.4135   2
   7   6  -1 238.668 41.8655   7
  -7   6   1 242.942 73.0626   2
   7   6   0 1120.33 96.6380   6
   7   6   1 176.417 29.8881   6
   7   6   1 138.795 66.2252   2
   7   6   2 648.746 83.8304   2
   7   6   3 1006.03 108.700   2
   7   6   4 1106.92 119.997   2
   7   6   5 2521.77 205.462  10
   7   6   5 2404.45 205.464   4
   7   6   6 1440.47 126.466   4
   7   6   6 1421.36 125.625  10
   7   6   6 1450.88 120.908   9
  -7   6  -6 1378.01 158.948   7
   7   6   6 1836.62 176.376   2
   7   6   7 361.289 46.8564   4
  -7   6  -7 370.416 79.8008   7
   7   6   7 394.998 80.3458   2
  -7  -6   8 157.849 23.2342  10
  -7   6  -8 173.226 67.3637   7
   7   6   8 125.919 57.5264   2
  -7  -6   9 171.030 22.0792  10
  -7   6  -9 132.705 42.9533   5
  -7   6 -10 103.361 46.7658   5
  -7   7  10 714.534 54.6639  10
   7   7 -10 137.913 66.9537   5
  -7   7   9 730.736 69.2114  10
  -7   7   9 693.615 70.5942   9
   7   7  -9 865.767 99.9490   5
  -7   7   8 985.239 87.3837  10
  -7   7   8 883.594 87.0575   8
  -7   7   8 888.403 88.1198   9
  -7   7   8 870.617 134.917   2
  -7   7   7 1041.93 151.078   2
  -7   7   7 1077.19 104.334   9
  -7   7   7 1136.47 105.164   8
   7   7  -7 1108.63 144.303   7
  -7   7   6 1147.99 148.466   2
   7  -7   6 1152.65 108.284   4
   7   7  -6 1068.04 138.473   7
  -7   7   6 1091.77 103.877   8
   7  -7   5 241.936 36.5695   4
   7   7  -5 273.598 59.0316   7
  -7   7   5 179.163 56.2629   2
  -7   7   4 968.000 117.363   2
   7   7  -4 977.036 111.290   7
  -7   7   3 1087.83 124.802   2
  -7   7   2 1841.36 200.811   2
   7   7  -2 2139.93 184.744   7
   7   7  -1 2557.22 219.949   7
   7   7   0 7495.50 581.581   6
   7   7   1 2515.54 206.425   6
   7   7   2 1660.45 179.336   2
   7   7   3 1111.96 123.612   2
   7   7   4 861.222 107.144   2
   7   7   5 169.507 21.2918   9
  -7   7  -5 101.472 39.7584   5
   7   7   5 134.015 25.3777   4
   7   7   5 114.492 47.0796   2
   7   7   6 936.824 88.2811   4
  -7   7  -6 844.306 106.357   5
   7   7   6 991.249 83.2123   9
  -7   7  -6 791.635 116.796   7
  -7   7  -7 798.251 109.210   5
  -7   7  -7 982.670 133.781   7
   7   7   7 1147.75 145.530   2
  -7   7  -8 995.817 133.705   7
  -7   7  -8 645.562 99.0605   5
  -7   7  -9 539.305 83.5362   5
  -7   7 -10 34.4737 39.7336   5
   7   8  -9 674.263 98.2351   5
  -7   8   9 671.987 66.0649   8
  -7   8   9 754.987 70.6432   9
  -7   8   9 709.003 66.3517  10
   7   8  -8 9.52818 49.1519   5
  -7   8   8 6.78902 13.6198  10
  -7   8   8 17.2147 16.1305   8
  -7   8   8 3.30657 19.8818   9
   7   8  -7 478.134 90.3281   7
   7  -8   7 366.460 65.7531  11
  -7   8   7 535.322 53.1306  10
  -7   8   7 543.074 55.9367   8
  -7   8   7 510.671 57.8973   9
  -7   8   7 488.865 105.019   2
  -7   8   6 930.946 149.917   2
   7   8  -6 1104.89 143.659   7
  -7   8   6 1115.80 107.389   8
   7  -8   6 1426.40 113.809   4
  -7   8   5 4480.00 469.930   2
   7   8  -5 4740.99 456.529   7
  -7   8   4 7767.76 688.678   2
   7   8  -4 8671.95 674.867   7
  -7   8   3 2287.23 231.451   2
   7   8  -2 9.51243 26.5282   7
  -7   8   2 13.4342 49.0048   2
   7   8  -1 1539.07 130.628   6
   7   8  -1 1520.90 143.858   7
   7   8   0 294.226 37.1178   6
   7   8   1 1518.24 131.213   6
   7   8   2 40.5976 50.8412   2
   7   8   3 2029.44 208.220   2
   7   8   4 7029.24 593.698   2
   7   8   5 4329.46 331.717   4
   7   8   5 4492.83 327.537   9
  -7   8  -5 3973.45 365.464   7
   7   8   5 4671.43 390.777   2
   7   8   6 994.320 85.6278   4
  -7   8  -6 632.693 104.789   5
   7   8   6 949.987 80.0072   9
  -7   8  -6 842.996 118.150   7
   7   8   6 860.232 133.304   2
  -7   8  -7 359.604 77.9072   5
  -7   8  -7 334.343 77.4463   7
   7   8   7 490.024 98.3768   2
  -7   8  -8 25.3342 53.4130   5
  -7   8  -9 280.864 69.6572   5
  -7   8 -10 31.7404 43.5514   5
  -7   9   9 1089.21 89.8882   8
  -7   9   9 1135.38 93.8077   9
   7   9  -8 1172.80 152.995   5
  -7   9   8 1294.06 110.042  10
  -7   9   8 1267.14 110.817   8
  -7   9   8 1293.76 115.020   9
   7   9  -7 1753.58 186.305   5
   7  -9   7 1247.51 149.007  11
  -7   9   7 1590.66 134.591  10
  -7   9   7 1788.29 138.334   8
   7   9  -7 1812.81 191.693   7
  -7   9   7 1582.56 139.628   9
  -7   9   7 1497.78 208.002   2
  -7   9   6 1102.14 183.541   2
   7   9  -6 1180.60 159.599   7
  -7   9   6 1569.04 127.922   8
  -7   9   5 442.034 102.500   2
   7   9  -5 525.557 84.9126   7
   7   9  -5 538.220 97.7519   5
   7   9  -4 143.624 74.3836   5
  -7   9   4 598.866 101.698   2
   7   9  -3 73.7238 39.7362   7
  -7   9   3 41.2137 58.5829   2
  -7   9   2 1623.77 218.240   2
   7   9  -2 2358.92 195.854   7
   7   9  -1 3457.40 274.682   6
   7   9  -1 3329.78 289.536   7
   7   9   0 2731.91 222.217   6
   7   9   1 3271.55 264.972   6
   7   9   2 1600.97 193.411   2
   7   9   3 72.5630 59.0704   2
  -7   9  -4 172.236 64.6715   5
   7   9   4 331.714 78.7170   2
  -7   9  -5 361.918 81.4899   5
   7   9   5 448.407 42.2435   9
  -7   9  -5 390.564 72.4977   7
   7   9   5 387.901 91.0666   2
   7   9   6 1301.42 103.150   9
  -7   9  -6 1296.31 148.738   7
   7   9   6 1172.17 172.380   2
  -7   9  -7 1134.89 163.096   5
  -7   9  -7 1441.84 165.944   7
   7   9   7 1410.61 192.698   2
  -7   9  -8 614.204 112.469   5
  -7   9  -9 302.309 78.0033   5
  -7   9 -10 283.572 51.7306   5
   7  10  -9 62.0110 61.9878   5
  -7  10   9 443.095 43.4180   9
   7  10  -8-32.5206 70.3916   5
  -7  10   8 31.7771 15.6767   8
  -7  10   8 9.72043 21.9453   9
   7  10  -7-7.45755 78.1060   5
   7  10  -7 20.8721 50.1485   7
  -7  10   7 46.3494 14.9410  10
  -7  10   7 44.7919 17.7566   8
  -7  10   7 67.1949 24.9413   9
  -7  10   7 50.0133 70.7387   2
   7  10  -6 711.356 159.617   5
  -7  10   6 1301.34 113.389  10
  -7  10   6 1677.37 120.526   8
   7  10  -6 1252.41 157.354   7
  -7  10   6 954.370 186.662   2
  -7  10   5 837.026 166.628   2
   7  10  -5 1150.45 142.525   7
  -7  10   5 1321.02 102.792   8
   7  10  -5 672.936 144.347   5
   7  10  -4 1290.42 178.535   5
  -7  10   4 2407.04 242.488   2
   7  10  -3 1048.90 133.293   5
   7  10  -3 1258.88 124.760   7
  -7  10   3 1067.11 96.1785   5
   7  10  -2 1440.04 146.588   7
   7  10  -1 760.350 87.8317   7
   7  10  -1 705.572 70.9402   6
   7  10   0 2176.02 180.858   6
   7  10   1 607.578 63.0401   6
   7  10   3 1227.95 101.066   5
  -7  10  -3 916.047 122.765   5
   7  10   4 2013.19 153.392  12
  -7  10  -4 2338.68 186.569   7
   7  10   4 1784.44 221.373   2
   7  10   5 1097.99 90.4099   9
  -7  10  -5 931.221 147.578   5
   7  10   5 936.082 164.109   2
  -7  10  -6 627.226 142.554   5
   7  10   6 1100.99 88.7307   9
  -7  10  -6 1015.28 132.596   7
   7  10   6 808.238 160.192   2
  -7  10  -7 23.8492 76.5570   5
  -7  10  -7-6.60389 42.3107   7
   7  10   7 24.8515 70.2101   2
  -7  10  -8 20.8389 75.1729   5
   7  11  -9 401.692 71.1008   5
  -7  11   9 574.437 54.0406   9
  -7  11   8 957.202 81.4338   8
   7  11  -8 715.801 122.773   5
  -7  11   7 389.230 40.6601   8
   7  11  -7 134.867 91.1929   5
  -7  11   6 478.896 140.765   2
  -7  11   6 569.401 56.0898   8
   7  11  -6 786.316 110.208   7
   7  11  -6 252.377 109.092   5
  -7  11   5 1171.52 97.7140   8
  -7  11   5 583.386 167.746   2
   7  11  -4 678.133 119.073   5
   7  11  -4 1069.75 114.652   7
   7  11  -3 88.7526 38.9069  12
   7  11  -3 98.5277 47.8847   7
   7  11  -3 70.4579 53.7598   5
  -7  11   3 158.892 30.2084   5
  -7  11   3 87.3948 74.3116   2
   7  11  -2 285.883 57.3063   5
   7  11  -2 204.560 51.3898  12
  -7  11   2 270.945 48.4431  12
   7  11  -2 301.056 58.0510   7
  -7  11   2 392.724 42.7241   5
   7  11  -1 532.938 73.7482  12
  -7  11   1 441.599 62.4298  12
   7  11  -1 719.814 64.3150   6
   7  11  -1 734.535 83.1029   7
  -7  11   0 2335.76 222.824  12
   7  11   0 2697.69 233.042  12
   7  11   0 3082.05 223.398   6
   7  11   1 505.766 65.9030  12
  -7  11  -1 428.850 57.9638  12
  -7  11  -2 296.956 54.2829   5
   7  11   2 221.797 49.1112  12
  -7  11  -2 311.085 51.0962  12
   7  11   2 369.564 44.0476   5
   7  11   3 173.516 42.9486  12
   7  11   3 64.3295 66.0816   2
  -7  11  -3 239.153 57.9926   5
   7  11   3 172.256 34.7223   5
  -7  11  -3 184.947 50.4490   7
   7  11   4 575.553 73.1691  12
  -7  11  -4 729.867 110.631   5
  -7  11  -4 714.363 95.5771   7
   7  11   4 427.065 126.410   2
  -7  11  -5 259.404 95.5475   5
   7  11   5 558.292 151.285   2
   7  11   6 456.701 43.0741   9
  -7  11  -6 528.477 88.8338   7
   7  11   6 463.493 136.505   2
  -7  11  -7-16.9566 84.2910   5
  -7  11  -8 100.310 70.4133   5
  -7  11  -9 330.833 61.4724   5
   7  12  -8 198.630 61.6105   5
   7  12  -7-75.5063 66.6437   5
  -7  12   7 8.54783 12.0799   8
   7  12  -6 363.808 102.377   5
  -7  12   6 339.974 37.1363   8
   7  12  -6 309.511 74.5228   7
  -7  12   5 170.540 117.228   2
   7  12  -5 455.729 113.738   5
  -7  12   4 151.615 90.0324   2
   7  12  -4 173.100 45.2660  12
   7  12  -4 205.635 59.9058   7
   7  12  -4 177.564 68.9444   5
  -7  12   4 267.582 30.0032   8
   7  12  -3 687.438 86.0688  12
  -7  12   3 796.613 79.8134   5
   7  12  -3 662.965 99.0981   5
   7  12  -3 924.284 110.066   7
   7  12  -2 245.513 53.8932   5
   7  12  -2 259.873 55.3627  12
  -7  12   2 223.493 46.3658  12
  -7  12   2 295.394 40.7031   5
   7  12  -2 329.771 62.7613   7
   7  12  -2 286.474 41.1618   6
  -7  12   1 328.579 56.7084  12
   7  12  -1 447.771 68.8533  12
  -7  12   1 501.665 54.4264   5
   7  12  -1 553.183 64.2873   5
   7  12  -1 501.217 54.6776   6
  -7  12   0 332.401 51.8401  12
   7  12   0 297.793 59.7389  12
   7  12   0 385.878 49.9421   5
  -7  12   0 404.892 47.9796   5
  -7  12   0 372.391 54.6974   7
  -7  12  -1 376.389 60.7679  12
   7  12   1 400.947 67.8427  12
  -7  12  -1 542.735 60.2772   5
   7  12   1 515.786 57.4291   5
  -7  12  -1 484.342 69.5405   7
   7  12   2 256.851 52.1417  12
  -7  12  -2 200.676 48.1727  12
   7  12   2 395.924 45.4104   5
  -7  12  -2 260.017 49.8584   5
  -7  12  -2 260.614 55.3667   7
   7  12   3 635.431 86.8196  12
   7  12   3 949.218 86.8089   5
  -7  12  -3 739.244 97.5018   5
  -7  12  -3 887.893 106.544   7
   7  12   4 226.197 46.4481  12
  -7  12  -4 277.811 71.5713   5
  -7  12  -4 365.577 70.3695   7
  -7  12  -5 671.710 116.489   5
  -7  12  -5 553.132 91.4187   7
   7  12   5 326.724 133.297   2
  -7  12  -6 305.783 99.6547   5
   7  12   6 201.720 108.303   2
  -7  12  -7 78.5169 74.9173   5
  -7  12  -8 206.186 63.9542   5
  -7  12  -9 11.5670 27.2248   5
   7  13  -8 111.674 46.0286   5
  -7  13   8 176.416 27.0612   9
  -7  13   7 492.102 52.8571   9
   7  13  -7 412.478 85.0482   5
  -7  13   6 414.654 49.7720   9
   7  13  -6 436.543 94.6835   5
   7  13  -5 713.167 111.249   5
   7  13  -5 562.556 99.3791   7
   7  13  -4 313.162 71.1862   5
   7  13  -4 218.910 50.4448  12
   7  13  -4 248.788 67.0902   7
   7  13  -3 83.5725 42.8834   5
  -7  13   3 96.5452 28.0890   5
   7  13  -3 97.3354 42.7562  12
   7  13  -3 45.9301 42.2824   7
   7  13  -3 60.8268 26.3272   6
   7  13  -2 214.485 49.3571   5
   7  13  -2 269.921 60.3895  12
  -7  13   2 196.356 47.5752  12
   7  13  -2 283.432 60.8933   7
   7  13  -2 280.115 41.8744   6
  -7  13   2 315.354 41.4916   5
   7  13  -1 382.227 68.3006  12
  -7  13   1 233.214 53.4921  12
  -7  13   1 444.143 49.8747   5
   7  13  -1 354.326 53.7197   5
   7  13   0 20.9980 24.6140   5
  -7  13   0 2.06382 19.2570   5
   7  13   0 54.9286 44.3830  12
  -7  13   0 35.2770 33.0887  12
  -7  13  -1 432.307 63.4203  12
   7  13   1 384.108 68.3315  12
   7  13   1 423.996 54.6248   5
  -7  13  -1 489.067 57.7776   5
  -7  13  -1 450.776 70.5823   7
   7  13   2 317.369 60.8123  12
  -7  13  -2 273.322 56.3918  12
   7  13   2 431.512 52.6718   5
  -7  13  -2 390.415 56.2234   5
  -7  13  -2 320.368 64.4920   7
  -7  13  -3 29.8573 36.8866   5
   7  13   3 20.2325 27.6371   5
  -7  13  -3 48.7924 39.6140   7
   7  13   3 33.1403 36.7476  12
  -7  13  -4 216.170 62.1788   5
  -7  13  -4 170.422 55.6785   7
   7  13   4 139.910 44.8010  12
  -7  13  -5 466.799 87.5023   7
  -7  13  -5 661.096 105.030   5
  -7  13  -6 342.854 88.3354   5
  -7  13  -7 295.868 75.7629   5
  -7  13  -8 151.532 46.3611   5
   7  14  -8 249.567 44.9197   5
  -7  14   8 354.717 35.8218   9
  -7  14   7 267.428 35.7276   9
   7  14  -7 234.599 58.0639   5
  -7  14   6 541.867 57.2075   9
   7  14  -6 531.248 89.2722   5
   7  14  -5 311.793 70.8943   5
   7  14  -5 135.008 63.7958   7
   7  14  -4 564.367 86.0680   5
   7  14  -4 515.455 74.1572  12
   7  14  -4 576.004 98.6009   7
   7  14  -4 546.119 70.8039   6
   7  14  -3 419.601 67.1300   5
   7  14  -3 297.046 63.6163  12
   7  14  -3 369.742 73.2374   7
   7  14  -3 270.182 48.4506   6
   7  14  -2 282.897 62.8594  12
  -7  14   2 351.203 47.3513   5
   7  14  -2 351.021 54.6990   5
   7  14  -1 813.947 103.096  12
  -7  14   1 935.283 85.9876   5
   7  14  -1 730.646 88.2546   5
  -7  14   0 635.003 86.6360  12
   7  14   0 771.681 99.0112  12
  -7  14   0 770.279 79.6809   5
   7  14   0 886.853 85.0230   5
  -7  14  -1 792.047 97.2940  12
   7  14   1 966.428 110.011  12
   7  14   1 971.531 93.9110   5
  -7  14  -1 899.214 92.6375   5
  -7  14  -1 924.675 108.548   7
   7  14   2 358.679 66.0490  12
   7  14   2 437.212 56.2599   5
  -7  14  -2 448.716 59.1449   5
  -7  14  -2 387.534 72.6141   7
   7  14   3 205.228 52.8873  12
  -7  14  -3 241.630 63.4400   7
  -7  14  -3 266.637 52.3355   5
   7  14   3 293.520 47.7848   5
   7  14   4 443.113 68.2570  12
  -7  14  -4 462.441 75.3334   5
  -7  14  -4 462.067 89.6141   7
  -7  14  -5 219.339 64.0188   5
  -7  14  -5 194.199 61.8740   7
  -7  14  -6 632.042 95.9037   5
  -7  14  -7 277.728 58.7638   5
  -7  14  -8 255.900 43.9974   5
  -7  15   8 327.009 32.8951   9
  -7  15   7 419.914 42.2956   9
   7  15  -7 332.981 56.8678   5
  -7  15   6 147.543 25.6918   9
   7  15  -6 88.4098 42.3492   5
   7  15  -5 224.249 56.7594   5
   7  15  -4 109.167 44.0346   5
   7  15  -4 66.2346 43.8163  12
   7  15  -3 617.294 82.3677  12
  -7  15   3 632.580 69.8979   5
   7  15  -3 460.516 72.5760   5
   7  15  -2 1223.14 128.912  12
   7  15  -2 985.806 114.048   5
  -7  15   2 1242.99 111.640   5
   7  15  -1 619.779 100.370  12
  -7  15   1 867.370 81.3694   5
   7  15  -1 732.293 83.7181   5
   7  15   0 1859.43 167.584  12
  -7  15   0 1307.56 150.200  12
  -7  15   0 1729.49 145.278   5
   7  15   0 1594.91 146.492   5
  -7  15  -1 500.702 79.4216  12
   7  15   1 627.529 71.1758   5
  -7  15  -1 713.433 72.9768   5
   7  15   2 1143.33 127.271  12
   7  15   2 1263.32 117.306   5
  -7  15  -2 1134.56 116.175   5
  -7  15  -2 1232.18 139.697   7
   7  15   3 351.639 66.5361  12
  -7  15  -3 394.809 77.9686   7
  -7  15  -3 449.318 63.1235   5
   7  15   3 417.203 59.5973   5
  -7  15  -4 66.1465 39.7108   5
   7  15   4 35.9100 39.4903  12
  -7  15  -4 59.5157 40.4000   7
  -7  15  -5 183.494 51.8248   5
  -7  15  -6 66.3389 39.6753   5
  -7  15  -7 327.646 53.5419   5
  -7  15  -8 249.442 34.2566   5
  -7  16   6 1559.31 126.148   9
   7  16  -6 1393.77 140.839   5
  -7  16   5 995.999 83.3957   9
   7  16  -5 732.097 97.9126   5
   7  16  -4 299.419 57.4544  12
   7  16  -4 310.190 54.9515   5
   7  16  -3 1260.55 124.444  12
   7  16  -3 1064.49 116.570   5
   7  16  -2 606.830 87.5628  12
  -7  16   2 522.851 62.2123   5
   7  16  -2 448.891 64.9570   5
   7  16  -1 103.149 60.9434  12
   7  16  -1 75.2746 33.1341   5
  -7  16   1 111.828 30.7383   5
   7  16   0 40.3735 53.3278  12
   7  16   0 54.2649 27.0370   5
  -7  16   0 63.8682 26.6821   5
  -7  16  -1 188.401 36.8013   5
   7  16   1 125.291 34.1281   5
   7  16   2 648.179 91.2445  12
   7  16   2 593.133 72.8104   5
  -7  16  -2 664.012 74.5658   5
   7  16   3 1322.21 126.124  12
  -7  16  -3 1059.38 114.629   5
  -7  16  -4 405.419 61.8933   5
  -7  16  -5 808.730 92.7918   5
  -7  16  -6 1310.38 127.607   5
  -7  16  -7 545.870 60.7712   5
   7  17  -6 380.179 49.0162   5
   7  17  -5 996.405 100.871   5
   7  17  -4 136.709 44.0178  12
   7  17  -4 146.312 38.8786   5
   7  17  -3 318.023 60.3874  12
   7  17  -3 263.257 47.6697   5
   7  17  -2 863.059 104.144  12
   7  17  -2 687.540 83.9122   5
  -7  17   2 880.698 84.7275   5
   7  17  -1 1831.01 165.133  12
  -7  17   1 1564.14 137.672   5
   7  17  -1 1342.95 137.798   5
   7  17   0 1894.04 176.827  12
   7  17   0 1538.71 147.569   5
  -7  17   0 1646.28 146.873   5
  -7  17  -1 1382.42 123.977   5
   7  17   1 1275.72 124.355   5
   7  17   2 732.265 95.8203  12
  -7  17  -2 734.562 78.5922   5
   7  17   2 707.756 79.8518   5
   7  17   3 277.584 57.0846  12
  -7  17  -3 235.261 42.6112   5
  -7  17  -4 145.107 34.9831   5
  -7  17  -5 956.488 97.2524   5
  -7  17  -6 416.802 52.0878   5
   7  18  -5 537.417 59.9672   5
   7  18  -4 705.149 85.6094  12
   7  18  -4 838.438 81.9923   5
   7  18  -3 1050.56 107.876  12
   7  18  -3 933.787 97.0032   5
   7  18  -2 455.132 81.0593  12
  -7  18   2 464.987 58.0801   5
   7  18  -2 529.722 61.1061   5
   7  18  -1 219.770 66.7915  12
  -7  18   1 257.144 39.3797   5
   7  18  -1 204.182 39.1777   5
   7  18   0 903.007 112.009  12
   7  18   0 721.382 80.4600   5
  -7  18   0 796.408 80.2236   5
   7  18   1 138.993 34.7248   5
  -7  18  -1 170.707 32.6541   5
   7  18   2 644.281 86.1241  12
   7  18   2 548.972 68.4789   5
  -7  18  -2 616.248 67.6125   5
   7  18   3 1165.18 119.429  12
  -7  18  -3 1107.18 107.201   5
  -7  18  -4 1059.78 102.339   5
  -7  18  -5 567.605 62.1855   5
  -7  18  -6 558.913 55.6195   5
   7  19  -4 507.615 65.7466  12
   7  19  -4 647.164 63.1752   5
   7  19  -3 2.45040 40.0417  12
   7  19  -3 42.9700 23.7277   5
   7  19  -2 323.882 66.6766  12
   7  19  -2 342.219 45.2422   5
   7  19  -1 130.896 58.0709  12
  -7  19   1 107.260 28.5067   5
   7  19  -1 126.810 29.3665   5
   7  19   0 960.475 110.006  12
  -7  19   0 876.275 83.6152   5
   7  19   0 781.507 83.7332   5
  -7  19  -1 130.561 29.4372   5
   7  19   1 111.666 30.6068   5
   7  19   2 265.120 60.4360  12
  -7  19  -2 239.780 37.7980   5
   7  19   3 22.7214 43.4336  12
  -7  19  -3 37.1659 23.3397   5
  -7  19  -4 674.182 68.2566   5
  -7  19  -5 520.065 53.0931   5
   7  20  -3 215.316 46.0061  12
   7  20  -3 172.746 29.5350   5
   7  20  -2 2.64728 44.4031  12
   7  20  -2 11.1055 18.6756   5
   7  20  -1 396.368 66.7261  12
  -7  20   1 270.432 39.0999   5
   7  20  -1 282.911 39.8813   5
   7  20   0 651.683 86.3107  12
  -7  20   0 505.526 56.2223   5
   7  20   0 507.255 57.8311   5
   7  20   1 304.892 42.9008   5
  -7  20  -1 319.701 40.8530   5
   7  20   2 36.9864 44.7878  12
  -7  20  -2 4.52941 17.7715   5
  -7  20  -3 246.170 34.4251   5
  -7  20  -4 284.917 34.6129   5
   7  21  -2 91.8995 40.9901  12
   7  21  -1 99.7876 49.0542  12
   7  21   0 51.5261 48.3193  12
  -7  21   0 44.3454 19.4868   5
   7  21   0 34.2067 18.0890   5
  -7  21  -1 19.2792 16.6855   5
   7  21   2 52.8963 37.7915  12
  -7  21  -2 59.0390 18.5373   5
   8   0   0 539.499 51.1082   6
   8   0  -1 545.885 50.6832   6
   8   0   1 553.310 54.7240   6
  -8   0   1 574.109 44.4475   1
   8   0   1 484.523 44.4842   1
   8   0  -2 782.018 70.4511   6
  -8   0   5 85.5376 31.7684   1
   8   0   5 60.2593 30.9455   1
   8   0   6 1777.31 150.707   4
   8   0   6 1605.11 144.794  10
  -8   0   6 1787.75 142.798   9
   8   0   6 1829.23 175.699   1
  -8   0   6 1955.02 174.336   1
   8   0   7 1304.09 121.998   4
  -8   0   7 1284.48 112.379   9
   8   0   7 1192.87 115.773  10
  -8   0   7 1622.70 118.245   8
   8   0   7 1268.77 146.611   1
  -8   0   7 1376.92 143.301   1
  -8   0   8 11.3275 14.5866   9
  -8   0   8 1.29804 13.9576   8
  -8   0   8 14.2301 34.6028   1
   8   0   8 15.0275 22.3071   4
   8   0   8-27.0550 42.1978   1
  -8   0   9 23.1169 14.2610   8
  -8   0  10 399.185 43.1915  10
  -8   0 -11 46.2310 27.3851   5
  -8   0  11 30.3926 13.7495  10
  -8   1  11 235.474 28.9826  10
  -8   1  10 255.232 33.0698  10
  -8   1   9 29.8157 17.6689  10
  -8   1   9 6.43468 14.5932   8
   8  -1   8 301.990 43.4781   4
  -8   1   8 239.941 32.2951   9
  -8   1   8 289.831 36.0871   8
  -8   1   8 298.742 59.4131   1
   8  -1   8 247.932 63.0285   1
   8  -1   7 394.091 53.0907   4
  -8   1   7 416.625 44.3451   9
  -8   1   7 493.620 48.3438   8
   8  -1   7 360.851 70.8683   1
  -8   1   7 484.823 72.0346   1
   8  -1   6 397.154 47.3966   4
  -8   1   6 429.777 61.6323   1
  -8   1   6 370.345 38.6813   9
   8  -1   6 328.687 39.6534  10
  -8   1   5 3.31978 20.8734   1
  -8   1   4 1563.55 145.072   1
  -8   1   3 3873.77 312.901   1
  -8   1   2 2556.14 204.689   1
   8  -1   1 4786.38 407.602   6
   8   1  -1 4784.85 404.492   6
  -8   1   1 5842.94 403.486   2
   8  -1   0 4494.71 352.163   6
   8   1   0 4504.78 351.321   6
   8  -1  -1 4347.00 339.761   6
   8  -1  -2 2881.22 226.504   6
   8   1   2 2806.07 226.659   1
   8   1   3 3523.64 287.618   1
   8   1   4 1350.53 130.047   1
   8   1   5 3.54936 22.7420   1
   8   1   6 345.488 41.9693  10
  -8  -1   6 407.201 40.7645   8
  -8  -1   6 504.126 68.9789   1
   8   1   6 391.616 64.1615   1
  -8  -1   7 368.123 40.3784   9
   8   1   7 371.361 44.3059  10
  -8  -1   7 443.641 43.8995   8
  -8  -1   7 413.231 67.0950   1
   8   1   7 360.014 67.3848   1
  -8  -1   8 321.994 37.6979   8
   8   1   8 349.246 67.9297   1
  -8  -1   8 323.147 63.3389   1
  -8  -1   9 33.0391 14.6113   8
  -8  -1  10 233.185 30.3064  10
  -8   1 -11 225.975 42.6880   5
  -8  -1  11 246.558 28.0128  10
  -8   2  11 35.3254 14.7784  10
  -8   2  10 322.798 38.5386  10
  -8   2   9 512.663 52.5513  10
  -8   2   9 435.973 48.9980   8
  -8   2   8 53.8506 18.8142   8
  -8   2   8 50.1271 17.8388   9
   8  -2   8 17.2864 33.5129   1
  -8   2   8 57.0557 39.0493   1
   8  -2   8 39.1084 26.0010   4
   8  -2   7 665.297 70.9680   4
  -8   2   7 771.335 67.2141   8
  -8   2   7 624.072 62.6339   9
  -8   2   7 669.515 88.9594   1
   8  -2   7 535.018 92.9416   1
   8  -2   6 1650.46 145.622   4
  -8   2   6 1875.49 169.563   1
  -8   2   6 1701.11 139.092   9
   8  -2   6 1658.68 141.573  10
  -8   2   5 604.934 72.4763   1
   8   2  -5 491.043 70.2632   7
  -8   2   4 1239.45 118.433   1
   8   2  -4 1207.95 124.456   7
  -8   2   3 3591.83 296.314   1
   8   2  -3 3778.97 307.165   7
  -8   2   2 534.484 52.0763   1
   8   2  -1 768.767 74.3341   6
  -8   2   1 1024.33 82.4236   2
   8  -2   0 20.2056 14.6818   6
   8   2   1 540.391 56.4468   6
   8  -2  -1 555.172 53.0751   6
   8   2   1 622.314 57.0520   2
   8  -2  -2 534.815 49.0698   6
   8   2   2 462.211 48.3244   1
   8  -2  -3 4040.52 306.651   6
   8   2   3 3639.36 311.207   1
   8   2   4 942.283 97.4826   1
   8   2   5 360.985 56.5244   1
   8   2   6 1606.21 140.777   4
   8   2   6 1421.07 135.142  10
  -8  -2   6 1780.10 134.187   8
   8   2   6 1745.39 165.415   1
   8   2   7 599.341 65.3242  10
  -8  -2   7 751.543 64.0568   8
  -8   2  -7 581.176 96.4857   7
   8   2   7 690.825 94.4829   1
  -8  -2   7 667.441 91.9285   1
  -8  -2   8 35.7129 15.9315   8
   8   2   8 36.7694 36.7146   1
  -8  -2   8 14.6619 34.6984   1
  -8  -2   9 332.599 39.3814  10
  -8  -2  10 309.763 35.0616  10
  -8   2 -11 2.22100 28.9969   5
  -8  -2  11 13.7502 10.2623  10
   8   3 -10 300.676 45.4065   5
  -8   3  10 187.450 29.1748  10
  -8   3   9 79.0351 22.4401  10
  -8   3   9 80.0265 20.2710   8
  -8   3   9 79.0023 20.3484   9
   8  -3   8 425.949 51.1466   4
  -8   3   8 361.501 43.0369   9
  -8   3   8 406.138 44.9733   8
   8  -3   8 264.733 67.6087   1
  -8   3   7 2345.14 228.457   1
  -8   3   7 2743.27 202.744   8
  -8   3   7 2261.90 198.250   9
   8  -3   7 2442.34 206.074   4
  -8   3   6 2006.01 177.192   1
  -8   3   6 1681.27 144.681   9
   8   3  -6 1792.01 175.488   7
   8  -3   6 1789.56 151.415   4
  -8   3   5 773.261 86.2229   1
   8   3  -5 663.231 88.3373   7
   8  -3   5 707.563 69.1471   4
  -8   3   4 1309.41 122.666   1
   8   3  -4 1216.79 128.452   7
   8   3  -3 234.695 46.9925   7
  -8   3   3 211.253 34.2269   1
  -8   3   2 3470.70 261.733   2
   8   3  -2 2875.16 267.376   7
  -8   3   1 2050.77 181.125   2
   8  -3   0 199.306 28.0465   6
   8  -3  -1 1222.64 106.956   6
   8   3   1 1306.56 111.021   6
   8   3   1 1407.22 123.412   2
   8  -3  -2 2930.49 232.552   6
   8  -3  -3 252.188 32.9920   6
   8   3   3 239.397 36.7510   1
   8  -3  -4 1173.13 101.587   6
   8   3   4 1117.37 111.905   1
   8  -3  -5 627.212 62.0004   6
   8   3   5 636.755 78.2888   1
   8   3   6 1817.48 151.918   4
   8   3   6 1462.11 145.714  10
  -8  -3   6 1970.82 145.524   8
   8   3   6 1933.56 176.405   1
   8   3   7 2370.67 190.617   4
   8   3   7 1970.55 183.155  10
  -8  -3   7 2305.69 180.226   8
  -8   3  -7 2327.55 230.071   7
   8   3   7 2298.21 216.630   1
   8   3   8 473.011 57.6665   4
  -8  -3   8 459.529 46.2079   8
  -8  -3   8 493.590 79.2123   1
   8   3   8 410.053 75.4119   1
  -8  -3   9 128.754 22.9766  10
  -8   3 -10 141.375 37.2680   5
  -8  -3  10 188.405 24.2435  10
  -8   4   9 268.331 36.4541   9
  -8   4   9 358.779 39.4221   8
  -8   4   8 49.9007 19.8202   8
  -8   4   8 56.2715 19.6425   9
   8  -4   8 44.1793 42.8077   1
  -8   4   7 396.432 44.7814   8
  -8   4   7 351.761 41.8358   9
   8  -4   7 372.693 47.9748   4
  -8   4   6 765.522 90.3671   1
   8   4  -6 677.133 92.9378   7
  -8   4   6 659.792 62.9663   9
   8  -4   6 639.820 68.8019   4
  -8   4   5 1577.73 150.547   1
   8   4  -5 1578.15 155.941   7
   8  -4   5 1493.11 130.581   4
  -8   4   4 407.060 56.3195   1
   8   4  -4 464.481 67.8018   7
   8   4  -3 1327.09 132.727   7
  -8   4   2 947.327 90.5424   2
   8   4  -2 861.112 93.6168   7
  -8   4   1 1916.18 182.634   2
   8   4   0 24.7378 14.4672   6
   8   4   1 1653.42 142.640   6
   8  -4  -1 1764.47 140.910   6
   8   4   1 1643.78 166.906   2
   8  -4  -2 1132.54 100.024   6
   8   4   2 1225.08 109.856   6
   8   4   2 1296.19 111.571   2
   8  -4  -3 1540.85 127.894   6
   8  -4  -4 605.959 56.4291   6
   8   4   4 531.772 67.2209   1
   8   4   5 1385.96 122.730  10
   8   4   5 1478.97 125.809   4
   8   4   5 1699.45 148.995   1
   8   4   6 531.087 60.2990   4
   8   4   6 614.830 81.9278   1
   8   4   7 341.832 45.3522   4
  -8   4  -7 233.231 70.5327   7
   8   4   7 317.559 63.6619   1
  -8  -4   8 62.8792 39.0582   1
  -8  -4   9 322.513 36.2452  10
  -8   4 -10 133.869 39.8889   5
  -8  -4  10 149.375 20.5084  10
  -8   5  10 11.5619 13.1869  10
  -8   5   9 430.931 46.3282   8
  -8   5   9 366.481 45.4277   9
  -8   5   9 404.656 46.1341  10
  -8   5   8 1543.65 183.747   2
  -8   5   8 1771.11 143.862   8
  -8   5   8 1600.77 141.561   9
   8   5  -7 283.929 68.3350   7
  -8   5   7 397.327 45.3447   8
  -8   5   7 367.934 42.5115   9
   8  -5   7 336.746 47.0810   4
   8   5  -6 1958.79 177.966   7
   8  -5   6 1769.98 142.314   4
   8   5  -5 994.706 110.475   7
   8  -5   5 864.270 82.0776   4
   8   5  -4 224.446 49.6020   7
   8   5  -3 50.3152 32.8720   7
  -8   5   3 45.7487 28.6536   2
   8   5  -2 237.748 46.8378   7
  -8   5   2 223.393 46.2650   2
   8   5  -1 1130.96 97.6571   6
  -8   5   1 1109.62 130.592   2
   8   5   0 3970.44 313.599   6
   8   5   1 1125.32 102.900   6
   8   5   1 1339.34 142.965   2
   8  -5  -2 296.707 34.3144   6
   8   5   2 274.577 42.8373   6
   8   5   2 310.509 52.1454   2
   8  -5  -3 24.5173 13.8249   6
   8   5   3 47.2619 30.1565   2
   8   5   5 639.900 63.4608   4
   8   5   6 1630.14 141.319   4
   8   5   7 276.686 41.0688   4
  -8   5  -7 294.937 75.1282   7
  -8   5  -8 1602.75 200.679   7
   8   5   8 1917.20 199.347   2
  -8  -5   8 1666.17 180.708   1
  -8   5  -9 238.539 56.8118   5
  -8  -5   9 392.716 38.3430  10
  -8   5 -10 19.5031 32.6042   5
  -8  -5  10 11.8524 9.08386  10
  -8   6  10 182.577 26.6047  10
   8   6  -9 142.599 43.8276   5
  -8   6   9 98.0792 21.0835  10
  -8   6   9 82.8818 21.8468   8
  -8   6   9 79.6824 23.1988   9
  -8   6   8 90.4304 48.3871   2
   8   6  -8 230.294 48.7199   5
  -8   6   8 148.989 28.2649   9
   8   6  -7 30.5521 45.2088   7
   8  -6   7 9.21648 20.4633   4
  -8   6   7 6.82184 36.6689   2
  -8   6   7 3.04046 17.4932   9
  -8   6   6 1518.70 157.716   2
   8  -6   6 1278.79 113.925   4
   8   6  -6 1463.24 151.223   7
   8  -6   6 1043.42 122.518  11
  -8   6   5 1833.88 175.053   2
   8   6  -5 1487.12 164.443   7
   8  -6   5 1598.72 138.083   4
  -8   6   4 3055.35 261.223   2
   8   6  -4 2717.18 255.713   7
  -8   6   3 3810.61 327.390   2
   8   6  -3 3836.06 324.857   7
  -8   6   2 1390.19 146.511   2
   8   6  -1 353.610 40.3151   6
  -8   6   1 267.234 79.2294   2
   8   6   0 882.415 80.6182   6
   8   6   1 480.199 52.8522   6
   8   6   1 403.038 94.8677   2
   8   6   2 1913.03 158.835   6
   8   6   2 1614.64 174.807   2
   8   6   3 3881.74 329.353   2
   8   6   4 2647.64 240.189   2
   8   6   5 1410.32 118.260   9
   8   6   5 1435.14 124.086   4
   8   6   5 1764.71 163.204   2
   8   6   6 1228.98 114.452   4
  -8   6  -6 1289.00 148.089   7
   8   6   6 1548.16 160.823   2
   8   6   7 12.6492 21.3789   4
  -8   6  -7-27.3582 43.8242   7
   8   6   7 41.9521 39.5117   2
  -8   6  -8 120.577 45.5327   5
  -8   6  -8 221.614 70.6751   7
   8   6   8 116.809 55.0360   2
  -8   6  -9 110.400 46.6434   5
  -8  -6   9 106.330 17.6814  10
  -8   6 -10 137.150 47.0304   5
  -8   7  10 157.128 24.2782  10
   8   7  -9 553.740 80.7904   5
  -8   7   9 433.292 51.7774   9
  -8   7   9 486.190 49.5903  10
  -8   7   8 1360.16 119.180  10
  -8   7   8 1259.40 120.925   9
   8   7  -7 335.388 75.9817   7
  -8   7   7 417.231 46.9462   8
  -8   7   7 348.192 44.4556   9
   8   7  -7 479.577 71.5424   5
  -8   7   6 884.366 125.064   2
   8   7  -6 650.446 107.269   7
  -8   7   6 876.973 80.8391   8
   8  -7   6 837.496 84.5797   4
  -8   7   5 1004.66 128.133   2
   8  -7   5 894.870 93.5479   4
   8   7  -5 1000.58 123.193   7
   8   7  -4 102.480 39.5534   7
  -8   7   4 116.508 46.8989   2
  -8   7   3 688.916 93.8623   2
   8   7  -2 267.324 48.7251   7
  -8   7   2 143.896 60.4405   2
   8   7  -1 172.176 27.6042   6
   8   7  -1 154.051 37.8928   7
   8   7   0 3578.86 285.826   6
   8   7   1 397.656 47.9758   6
   8   7   2 58.1184 50.3560   2
   8   7   3 512.091 81.3156   2
   8   7   4 102.457 20.8658   4
   8   7   4 98.4642 41.8899   2
   8   7   5 862.263 74.4353   9
   8   7   5 955.655 81.5545   4
  -8   7  -5 681.642 92.6837   5
   8   7   5 960.926 118.722   2
   8   7   6 846.552 76.1112   4
  -8   7  -6 569.983 88.1413   5
  -8   7  -6 773.109 108.514   7
   8   7   6 842.802 117.158   2
  -8   7  -7 158.640 52.4542   5
  -8   7  -7 96.5862 52.8994   7
   8   7   7 200.086 66.6538   2
  -8   7  -8 502.509 84.0650   5
  -8   7  -9 275.553 63.2604   5
  -8   7 -10-3.44735 40.9923   5
   8   8  -9-4.56237 49.2159   5
  -8   8   9 46.3600 16.9364   8
  -8   8   9 64.9013 24.3387   9
  -8   8   9 65.3949 17.7108  10
   8   8  -8 244.438 70.1284   5
  -8   8   8 227.059 30.9395  10
  -8   8   8 196.703 30.8279   8
  -8   8   8 216.492 35.9787   9
  -8   8   7 1079.61 160.817   2
  -8   8   7 1233.69 107.941   8
  -8   8   7 1201.64 108.614   9
   8   8  -7 1137.23 149.828   7
   8  -8   7 940.649 118.163  11
  -8   8   6 1129.61 172.928   2
  -8   8   6 1389.75 124.359   8
   8   8  -6 1486.99 166.105   7
   8  -8   6 1487.79 128.278   4
  -8   8   5 615.105 112.137   2
   8   8  -5 694.926 101.263   7
   8   8  -5 842.187 104.645   5
  -8   8   4 456.770 89.3493   2
   8   8  -4 711.914 88.3980   7
  -8   8   3 1287.48 157.762   2
  -8   8   2 922.848 135.309   2
   8   8  -2 1134.15 114.791   7
   8   8  -1 411.371 46.2079   6
   8   8  -1 395.863 59.1929   7
   8   8   0 1434.66 123.927   6
   8   8   1 455.518 52.8779   6
   8   8   2 768.743 120.292   2
   8   8   3 1335.35 159.494   2
  -8   8  -4 220.463 58.6102   5
   8   8   4 495.667 84.5093   2
   8   8   5 654.180 57.8791   9
  -8   8  -5 525.486 86.4870   5
   8   8   5 661.406 64.2630   4
   8   8   5 691.586 108.222   2
   8   8   6 1341.54 104.431   4
  -8   8  -6 768.562 123.695   5
  -8   8  -6 935.404 131.742   7
   8   8   6 1240.02 161.136   2
  -8   8  -7 508.173 99.9957   5
  -8   8  -7 914.170 123.652   7
   8   8   7 865.584 136.238   2
  -8   8  -8 56.8396 55.3451   5
  -8   8  -9-41.0153 50.0410   5
  -8   9   9 33.7787 15.3001   8
  -8   9   9 49.2164 22.4693   9
  -8   9   8 389.260 40.0494  10
  -8   9   8 334.017 41.1281   8
  -8   9   8 381.150 47.9706   9
   8   9  -7 329.109 91.0790   5
   8   9  -7 266.214 74.5818   7
  -8   9   7 255.923 90.3913   2
  -8   9   7 277.274 33.5291  10
   8  -9   7 165.322 50.3401  11
  -8   9   7 256.508 36.1342   8
  -8   9   7 285.479 42.3193   9
   8   9  -6 206.114 61.9760   7
  -8   9   6 73.4137 62.9742   2
   8   9  -6 167.765 75.0104   5
  -8   9   6 142.760 25.7276   8
   8   9  -5 575.155 99.7929   5
   8   9  -5 396.068 78.2635   7
  -8   9   5 289.894 91.3652   2
  -8   9   4 62.6160 56.2512   2
   8   9  -4-28.8173 61.1424   5
  -8   9   3 274.546 85.7329   2
   8   9  -3 450.220 67.5428   7
  -8   9   2 2708.65 316.287   2
   8   9  -2 3760.35 294.507   7
   8   9  -1 1989.15 167.072   6
   8   9   0 224.950 33.1729   6
   8   9   1 2023.33 171.464   6
   8   9   2 2833.29 290.940   2
   8   9   3 213.835 81.9436   2
  -8   9  -4-10.0189 53.5009   5
   8   9   4 33.8055 49.9853   2
  -8   9  -5 205.102 76.6256   5
   8   9   5 349.768 34.0550   9
  -8   9  -5 234.627 61.5652   7
   8   9   5 282.200 88.1617   2
   8   9   6 70.3432 59.5873   2
  -8   9  -6 73.7823 44.4262   7
  -8   9  -6 12.7254 63.4051   5
   8   9   7 182.755 76.7739   2
  -8   9  -7 221.909 82.6640   5
  -8   9  -7 67.4734 52.8726   7
  -8   9  -8 42.8638 66.3327   5
  -8   9  -9-28.8860 57.8996   5
  -8   9 -10 63.7522 29.4681   5
  -8  10   9 118.278 25.4425   9
   8  10  -8 76.3356 69.7086   5
  -8  10   8 159.603 24.5640   8
  -8  10   8 133.457 30.8941   9
   8  10  -7 485.401 97.6827   7
  -8  10   7 613.558 58.6932  10
  -8  10   7 718.489 62.9375   8
  -8  10   7 633.785 67.1645   9
   8  10  -6 477.479 131.325   5
  -8  10   6 522.428 140.710   2
  -8  10   6 921.439 77.3919  10
  -8  10   6 909.461 81.0585   8
   8  10  -6 780.623 119.434   7
   8  10  -5 285.940 69.8484   7
   8  10  -5 160.419 86.8295   5
  -8  10   5 157.424 86.0154   2
   8  10  -4 32.9602 70.7549   5
  -8  10   4 224.490 93.1170   2
  -8  10   3 244.467 92.2905   2
   8  10  -3 364.085 62.6973  12
  -8  10   3 689.784 59.7500   5
   8  10  -3 560.024 83.3399   7
   8  10  -3 577.289 91.8694   5
   8  10  -2 264.760 54.5245   7
   8  10  -1 150.197 27.3276   6
   8  10   0 329.450 42.0712   6
   8  10   1 191.117 33.9886   6
   8  10   3 445.494 64.9835  12
  -8  10  -3 487.785 82.9789   5
   8  10   3 369.241 107.258   2
   8  10   4 331.818 48.3643  12
   8  10   4 337.733 94.9019   2
  -8  10  -5 28.6482 71.4888   5
   8  10   5 163.429 84.1757   2
  -8  10  -6 637.773 125.800   5
  -8  10  -6 701.575 106.291   7
   8  10   6 648.111 145.758   2
  -8  10  -7 480.074 86.3919   7
  -8  10  -7 160.168 99.2801   5
  -8  10  -8 6.60649 65.6759   5
  -8  10  -9 43.1856 46.7974   5
  -8  11   9 176.429 28.3595   9
  -8  11   8 553.760 50.9025   8
  -8  11   8 500.003 56.1429   9
   8  11  -7 14.8846 81.5887   5
  -8  11   7 407.720 40.7432   8
  -8  11   6 104.660 101.236   2
  -8  11   6 278.968 35.0643   8
   8  11  -6 239.039 68.1749   7
  -8  11   5 340.940 124.764   2
   8  11  -5 202.193 94.0182   5
   8  11  -4 5.74620 37.5033   7
   8  11  -4-6.43296 63.4625   5
  -8  11   4 75.6897 77.7777   2
   8  11  -3 89.3627 50.4427   5
  -8  11   3 164.458 32.1095   5
   8  11  -3 105.276 42.9231  12
   8  11  -3 216.902 51.7315   7
   8  11  -2 376.972 63.2126  12
  -8  11   2 446.408 51.3682   5
   8  11  -2 507.048 56.9009   6
   8  11  -2 435.909 67.0476   5
   8  11  -2 630.322 77.6124   7
  -8  11   1 541.776 70.8398  12
   8  11  -1 568.160 81.2077  12
   8  11   0 278.641 54.3389  12
   8  11   0 354.079 41.0304   6
  -8  11  -1 412.567 57.4767  12
   8  11   1 439.924 64.6193  12
  -8  11  -2 270.230 49.3897   5
   8  11   2 243.111 52.6713  12
   8  11   2 340.132 41.5967   5
  -8  11  -3 119.919 46.2678   5
   8  11   3 203.078 35.5947   5
   8  11   3 173.078 44.5288  12
   8  11   4-24.5483 72.6101   2
  -8  11  -4 5.62440 52.8551   5
  -8  11  -4 74.1237 39.2235   7
   8  11   4 15.9254 31.4304  12
   8  11   5 219.927 108.483   2
   8  11   6 147.392 96.6784   2
  -8  11  -6 194.023 58.6005   7
  -8  11  -6 8.36649 86.2663   5
  -8  11  -8 335.637 86.3791   5
  -8  11  -9 104.440 40.4672   5
   8  12  -8 28.4938 43.2294   5
  -8  12   7 155.388 23.2580   8
   8  12  -7 184.864 73.8507   5
  -8  12   6 634.954 166.263   2
  -8  12   6 1016.19 86.3834   8
   8  12  -6 851.461 128.359   7
   8  12  -6 1008.62 145.453   5
  -8  12   5 60.3993 92.4478   2
   8  12  -5 195.245 78.8352   5
  -8  12   5 208.900 28.8282   8
  -8  12   4 469.134 136.713   2
   8  12  -4 641.078 81.3426  12
   8  12  -4 773.175 111.930   5
   8  12  -4 956.427 115.104   7
   8  12  -3 1055.17 123.487  12
  -8  12   3 1369.47 118.825   5
   8  12  -3 1492.67 126.305   6
   8  12  -3 1172.63 137.375   5
   8  12  -3 1273.01 144.538   7
   8  12  -2 711.349 95.4036  12
  -8  12   2 976.759 85.7178   5
   8  12  -2 917.403 89.4803   6
   8  12  -2 784.164 95.4660   5
   8  12  -2 931.245 109.488   7
   8  12  -1 7.56296 24.2794   5
  -8  12   1 10.3754 16.9264   5
   8  12  -1 9.20268 39.6706  12
  -8  12   1-4.33642 32.0826  12
   8  12  -1-2.00300 16.5704   6
   8  12   0 33.9759 45.5432  12
  -8  12   0-15.3241 31.4802  12
  -8  12   0-6.08452 22.8197   7
   8  12   0 2.11408 20.8562   5
  -8  12   0 18.1808 18.3523   5
   8  12   1 20.8657 40.8146  12
  -8  12  -1-2.28518 31.6960  12
  -8  12  -1 31.9889 21.1382   5
   8  12   1 37.3186 21.6252   5
  -8  12  -1 30.5795 28.3546   7
   8  12   2 742.005 93.6369  12
   8  12   2 930.680 87.0762   5
  -8  12  -2 808.742 91.2279   5
  -8  12  -2 1064.36 112.590   7
   8  12   3 1067.13 124.526  12
   8  12   3 1540.93 125.469   5
  -8  12  -3 1318.74 135.463   5
  -8  12  -3 1345.97 146.280   7
  -8  12  -4 710.545 96.9393   5
  -8  12  -4 592.089 90.0800   7
   8  12   4 502.501 71.0321  12
   8  12   5 58.4819 102.905   2
  -8  12  -5 187.943 57.1271   7
  -8  12  -5 240.222 78.0118   5
   8  12   6 517.171 160.375   2
  -8  12  -6 977.599 137.110   5
  -8  12  -7 132.274 71.4649   5
  -8  12  -8 32.5493 44.3751   5
  -8  12  -9 18.2776 22.3531   5
  -8  13   7 1123.20 101.019   9
   8  13  -7 1069.68 130.416   5
  -8  13   6 125.379 28.4517   9
   8  13  -6 161.181 68.0580   5
   8  13  -5 69.0183 58.7063   5
   8  13  -5 67.3505 41.8407   7
   8  13  -4 490.630 81.9964   5
   8  13  -4 360.156 63.2967  12
   8  13  -4 414.945 83.4923   7
   8  13  -4 491.495 64.8379   6
   8  13  -3 960.574 122.415  12
  -8  13   3 1298.18 116.793   5
   8  13  -3 1393.73 123.536   6
   8  13  -3 1237.25 133.183   5
   8  13  -3 1319.03 149.195   7
   8  13  -2 662.824 82.9456   5
   8  13  -2 696.835 90.2836  12
   8  13  -2 763.023 78.5854   6
  -8  13   2 725.155 74.1371   5
   8  13  -1 593.391 83.4234  12
   8  13  -1 547.159 69.2692   5
  -8  13   1 597.356 63.4288   5
   8  13   0 595.410 81.0494  12
   8  13   0 596.976 64.7717   5
  -8  13   0 635.687 62.4129   5
   8  13   1 652.409 87.2824  12
  -8  13  -1 601.579 69.6207   5
   8  13   1 720.461 71.5439   5
  -8  13  -1 557.091 82.5775   7
   8  13   2 599.062 81.7732  12
   8  13   2 646.415 69.0152   5
  -8  13  -2 663.635 72.2026   5
  -8  13  -2 458.725 83.1464   7
   8  13   3 949.829 106.946  12
   8  13   3 1001.60 100.328   5
  -8  13  -3 936.566 122.666   7
  -8  13  -3 1063.42 110.400   5
   8  13   4 254.108 55.8416  12
  -8  13  -4 402.803 70.7119   5
  -8  13  -4 324.596 72.2614   7
  -8  13  -5 43.5717 54.1775   5
  -8  13  -5 18.2676 35.2699   7
  -8  13  -6 182.858 71.4664   5
  -8  13  -7 1099.71 131.419   5
  -8  13  -8 364.336 56.4735   5
  -8  14   8 26.8612 14.4857   9
   8  14  -7 128.380 44.5125   5
  -8  14   7 162.566 27.7716   9
   8  14  -6 380.711 72.0198   5
  -8  14   6 426.782 48.6324   9
   8  14  -5 1395.26 152.672   5
   8  14  -4 1858.88 198.512   5
   8  14  -4 2041.03 188.452  12
   8  14  -4 2401.47 194.618   6
   8  14  -3 864.386 108.174   5
   8  14  -3 908.172 109.224  12
   8  14  -3 1088.61 105.223   6
  -8  14   3 1107.31 100.963   5
   8  14  -2 801.065 97.4831  12
   8  14  -2 684.555 84.7968   5
  -8  14   2 809.674 79.5090   5
   8  14  -1 478.128 78.8854  12
  -8  14   1 522.137 55.6528   5
   8  14  -1 368.463 56.2567   5
   8  14   0 20.9160 22.6761   5
  -8  14   0 36.3229 21.5229   5
   8  14   0 36.6651 46.8185  12
   8  14   1 487.026 77.6029  12
   8  14   1 491.391 59.4008   5
  -8  14  -1 508.874 59.0589   5
  -8  14  -1 381.181 68.4190   7
   8  14   2 664.416 92.9111  12
  -8  14  -2 826.967 85.7546   5
   8  14   2 802.514 83.2659   5
  -8  14  -2 790.605 105.440   7
   8  14   3 1075.75 110.385  12
   8  14   3 994.486 100.272   5
  -8  14  -3 935.096 123.626   7
  -8  14  -3 885.541 103.015   5
   8  14   4 1930.95 178.659  12
  -8  14  -4 1913.64 205.540   7
  -8  14  -4 2079.93 190.451   5
  -8  14  -5 1531.70 160.494   5
  -8  14  -6 372.636 71.6871   5
  -8  14  -7 157.261 44.3878   5
  -8  14  -8-5.45005 21.3721   5
  -8  15   7 1099.94 94.9886   9
  -8  15   6 992.154 85.1295   9
   8  15  -6 780.115 99.8605   5
   8  15  -5 115.423 47.1865   5
   8  15  -4 195.828 50.3011   5
   8  15  -4 169.193 48.8605  12
   8  15  -3 64.7442 34.5462   5
   8  15  -3 25.5162 44.6557  12
   8  15  -2 1408.73 140.664  12
  -8  15   2 1311.67 120.234   5
   8  15  -2 1212.31 124.765   5
   8  15  -1 916.335 111.781  12
   8  15  -1 841.010 92.3487   5
  -8  15   1 945.550 89.5989   5
   8  15   0 351.279 72.6264  12
   8  15   0 316.612 49.4072   5
  -8  15   0 398.390 48.8740   5
  -8  15  -1 813.766 83.1287   5
   8  15   1 792.741 83.8959   5
   8  15   2 1122.72 126.883  12
  -8  15  -2 1130.48 111.220   5
   8  15   2 1272.54 113.384   5
  -8  15  -2 946.451 127.870   7
   8  15   3 56.6122 45.4502  12
  -8  15  -3 39.3219 36.2735   7
  -8  15  -3 77.9840 32.5648   5
   8  15   4 234.727 52.3091  12
  -8  15  -4 199.566 46.9146   5
  -8  15  -5 169.891 48.7407   5
  -8  15  -6 983.900 107.226   5
  -8  15  -7 808.354 84.0934   5
  -8  16   7 256.734 28.6101   9
   8  16  -6 538.977 68.3498   5
  -8  16   6 635.773 57.8745   9
   8  16  -5 367.762 56.6970   5
   8  16  -4 1021.04 106.065  12
   8  16  -4 995.255 106.861   5
   8  16  -3 663.691 89.2841  12
   8  16  -3 710.316 81.4038   5
   8  16  -2 314.890 70.4335  12
  -8  16   2 353.068 46.7376   5
   8  16  -2 251.198 47.8111   5
   8  16  -1 1221.42 132.934  12
   8  16  -1 1069.46 111.379   5
  -8  16   1 1214.38 109.821   5
   8  16   0 101.790 59.1524  12
  -8  16   0 111.925 27.9867   5
   8  16   0 112.928 31.7082   5
   8  16   1 1252.34 117.580   5
  -8  16  -1 1206.08 114.888   5
   8  16   2 367.194 69.7065  12
   8  16   2 314.421 48.1527   5
  -8  16  -2 249.384 44.2580   5
   8  16   3 672.419 89.3160  12
  -8  16  -3 716.659 79.6873   5
  -8  16  -4 1085.66 109.732   5
  -8  16  -5 467.270 63.8711   5
  -8  16  -6 656.614 73.1951   5
  -8  16  -7 199.009 31.0809   5
   8 -17   6 216.409 42.7819  11
  -8  17   5 147.881 22.7766   9
   8  17  -5 111.583 32.9420   5
   8  17  -4 34.6447 28.2747   5
   8  17  -4 42.4577 37.3541  12
   8  17  -3 372.890 64.9505  12
   8  17  -3 365.435 52.9120   5
   8  17  -2 189.723 40.2218   5
  -8  17   2 236.241 38.8622   5
   8  17  -2 250.952 62.8575  12
   8  17  -1 797.129 105.668  12
   8  17  -1 653.904 77.0044   5
  -8  17   1 753.267 75.7121   5
   8  17   0 1739.65 165.804  12
  -8  17   0 1481.46 133.708   5
   8  17   0 1413.92 135.228   5
  -8  17  -1 867.704 84.6319   5
   8  17   1 795.967 85.9046   5
   8  17   2 272.988 64.0589  12
   8  17   2 306.642 47.7621   5
  -8  17  -2 287.409 43.7098   5
   8  17   3 349.769 63.9905  12
  -8  17  -3 319.329 48.3209   5
  -8  17  -4 35.3068 25.7717   5
  -8  17  -5 116.513 31.8200   5
  -8  17  -6 289.322 39.4329   5
   8  18  -4 58.8476 25.2642   5
   8  18  -4 22.3592 34.9952  12
   8  18  -3 364.291 62.7411  12
   8  18  -3 300.215 44.8899   5
  -8  18   2 173.595 34.4628   5
   8  18  -2 166.267 34.8166   5
   8  18  -2 241.393 64.1356  12
  -8  18   1 15.4821 20.2876   5
   8  18  -1 14.9524 22.6925   5
   8  18  -1 37.9808 55.6229  12
  -8  18   0 28.5383 21.6653   5
   8  18   0 12.7360 22.0903   5
   8  18   0-35.3196 57.0630  12
   8  18   1-6.51973 22.4211   5
  -8  18  -1 13.3872 19.5896   5
   8  18   2 216.545 40.2431   5
   8  18   2 231.004 62.2160  12
  -8  18  -2 261.799 39.4707   5
   8  18   3 334.045 61.0654  12
  -8  18  -3 285.923 43.2109   5
  -8  18  -4 37.3960 23.4566   5
  -8  18  -5 45.7131 21.2191   5
  -8  18  -6 101.471 19.7542   5
   8  19  -3 153.865 29.0254   5
   8  19  -3 133.573 45.8879  12
   8  19  -2 298.278 60.9676  12
   8  19  -2 242.400 37.3655   5
  -8  19   1 21.1326 19.9427   5
   8  19  -1 46.4254 22.2250   5
   8  19  -1 44.7781 53.7808  12
  -8  19   0 6.92512 19.4686   5
   8  19   0 17.1863 21.0788   5
   8  19   0 14.3738 53.3610  12
   8  19   1 43.1577 24.5151   5
  -8  19  -1 40.8649 20.4936   5
   8  19   2 245.571 61.3300  12
  -8  19  -2 236.654 34.6619   5
  -8  19  -3 129.600 27.0411   5
  -8  19  -4 25.5670 18.7181   5
  -8  19  -5 13.7317 13.9449   5
   8  20  -3 110.485 39.2661  12
   8  20  -2 219.292 53.2624  12
   8  20  -1 421.839 67.1992  12
   8  20  -1 320.310 42.4199   5
  -8  20   0 9.02220 18.8258   5
   8  20   0 36.0137 20.8716   5
  -8  20  -1 315.799 39.0480   5
   8  20   2 229.955 54.6762  12
  -8  20  -2 223.071 32.0265   5
  -8  20  -3 147.969 25.1783   5
  -8  20  -4 148.799 22.3944   5
   8  21  -2 91.9297 38.3132  12
   8  21  -1 403.041 64.4270  12
   8  21   0 315.623 60.3946  12
   8  21   1 512.109 66.5448  12
  -8  21  -1 369.250 42.5534   5
  -8  21  -2 87.7570 19.1943   5
   8  21   2 71.7061 38.9781  12
   9   0   0 7.38080 12.0695   6
   9   0  -1 2613.05 225.490   6
   9   0   1 2610.64 229.308   6
  -9   0   1 2957.77 218.705   2
   9   0  -2 8371.67 656.178   6
   9   0   2 8164.58 655.872   1
  -9   0   2 8877.97 654.988   1
  -9   0   3 18804.0 1447.38   1
  -9   0   4 1697.72 155.734   1
   9   0   5 4235.04 374.351   1
  -9   0   5 4636.29 371.293   1
   9   0   6 5326.51 419.690   4
  -9   0   6 5253.85 410.453   9
   9   0   6 5145.06 443.190   1
  -9   0   6 5384.00 439.595   1
   9   0   7 349.001 49.7878   4
  -9   0   7 377.059 39.5850   9
  -9   0   7 409.402 42.4586   8
   9   0   7 250.731 58.8277   1
  -9   0   7 370.252 60.8028   1
   9   0   8 38.2964 28.8599   4
  -9   0   8 63.9423 18.3337   8
  -9   0   8 43.7421 16.0274   9
   9   0   8 51.7031 40.5058   1
  -9   0   8 58.1002 33.7439   1
  -9   0   9 41.3694 16.3922   8
  -9   0  10 364.182 40.8799  10
  -9   1  10 190.400 28.0285  10
  -9   1   9 872.668 79.5380   8
   9  -1   8 1872.07 157.884   4
  -9   1   8 1741.85 145.713   9
  -9   1   8 1830.50 149.010   8
  -9   1   8 1728.53 175.501   1
   9  -1   8 1451.27 177.130   1
   9  -1   7 2438.44 206.231   4
  -9   1   7 2212.93 195.025   9
  -9   1   7 2724.68 200.154   8
  -9   1   7 2591.43 227.634   1
   9  -1   7 2282.49 229.990   1
   9  -1   6 3101.87 287.634   1
  -9   1   6 3600.87 285.609   1
  -9   1   6 3172.57 254.219   9
   9  -1   6 3168.28 262.544   4
  -9   1   5 1334.86 131.237   1
  -9   1   4 1011.98 101.125   1
  -9   1   3 2798.97 229.912   1
   9   1  -2 2969.95 229.061   6
  -9   1   2 2759.52 225.501   1
   9  -1   1 3598.88 304.670   6
   9   1  -1 3683.37 301.329   6
  -9   1   1 4122.25 301.372   2
   9   1   0 79.7597 18.9077   6
   9  -1   0 74.6234 18.7899   6
   9  -1  -1 3221.03 282.093   6
  -9  -1   1 3517.85 275.495   1
   9   1   1 4028.86 280.294   2
   9  -1  -2 2543.83 204.131   6
   9   1   2 2510.22 201.840   1
   9  -1  -3 2746.01 213.875   6
   9   1   3 2469.90 216.502   1
   9   1   4 1072.29 107.578   1
   9   1   5 1212.54 125.030   1
   9   1   6 3150.08 291.319   1
  -9  -1   6 3485.17 292.456   1
  -9  -1   7 2617.90 203.053   8
  -9  -1   7 2245.36 226.861   1
   9   1   7 2323.00 231.060   1
  -9  -1   8 1857.97 154.985   8
   9   1   8 1941.95 192.158   1
  -9  -1   8 1865.93 184.126   1
  -9  -1   9 750.470 68.4585   8
  -9  -1  10 212.730 28.5615  10
  -9   2  10 335.843 38.8062  10
  -9   2   9 399.225 44.7503   8
  -9   2   8 12.0092 15.9333   8
  -9   2   8 27.5823 16.0760   9
  -9   2   8-17.9112 32.1991   1
   9  -2   8-32.5516 38.4322   1
   9  -2   8 12.8677 23.8062   4
  -9   2   7 635.450 87.1484   1
   9  -2   7 578.061 94.4682   1
  -9   2   7 733.837 68.2473   8
  -9   2   7 683.871 65.1403   9
   9  -2   7 729.894 75.0937   4
  -9   2   6 541.365 73.2233   1
  -9   2   6 501.035 49.9335   9
   9  -2   6 510.653 57.4675   4
  -9   2   5 2371.33 211.565   1
  -9   2   4 1161.64 112.212   1
  -9   2   3 4539.56 362.747   1
   9   2  -2 726.822 68.2598   6
   9   2  -1 1261.13 109.215   6
  -9   2   1 1344.90 120.444   2
   9  -2   0 124.246 23.1483   6
   9  -2  -1 1085.88 99.1716   6
   9   2   1 1365.97 111.482   2
   9  -2  -2 948.694 81.1701   6
   9   2   2 854.490 78.1706   1
   9  -2  -3 4865.46 364.643   6
   9   2   3 4316.14 366.885   1
   9  -2  -4 1104.26 97.8424   6
   9   2   4 1016.98 105.332   1
   9  -2  -5 2355.58 196.860   6
   9   2   5 2376.20 212.609   1
   9  -2  -6 513.491 58.1863   6
   9   2   6 586.963 61.7028   4
  -9  -2   6 524.995 51.3792   8
   9   2   6 569.500 77.2373   1
  -9  -2   7 736.699 64.0867   8
  -9   2  -7 553.345 96.1060   7
   9   2   7 571.480 88.9440   1
  -9  -2   7 625.767 87.7295   1
  -9  -2   8 3.46600 12.5814   8
   9   2   8 5.06863 36.4416   1
  -9  -2   8-13.5721 33.4692   1
  -9  -2   9 332.480 36.0255   8
  -9  -2  10 381.606 40.2501  10
  -9   3  10 489.129 50.9351  10
  -9   3   9 23.9875 18.2717  10
  -9   3   9 52.6253 18.1090   8
  -9   3   9 53.8679 17.2837   9
   9  -3   8 688.115 72.6715   4
  -9   3   8 630.749 64.5754   9
  -9   3   8 739.470 68.8950   8
   9  -3   8 602.293 98.4254   1
  -9   3   7 1097.20 120.589   1
  -9   3   7 1194.66 95.9221   8
  -9   3   7 903.531 91.0146   9
   9  -3   7 1034.50 100.115   4
  -9   3   6 1354.66 128.467   1
  -9   3   6 1100.34 98.1977   9
   9  -3   6 1144.53 105.719   4
  -9   3   5 521.997 69.9914   1
   9   3  -5 608.750 80.4230   7
   9   3  -4 258.970 51.9750   7
  -9   3   4 238.389 40.7493   1
  -9   3   2 830.821 80.0623   2
  -9   3   1 3840.94 324.536   2
   9  -3   0 152.153 25.9283   6
   9  -3  -1 3712.85 294.630   6
   9   3   1 3706.08 297.456   6
   9   3   1 3827.72 315.512   2
   9  -3  -2 1037.05 93.4709   6
   9   3   2 1136.68 98.6795   2
   9  -3  -3 409.812 44.3297   6
   9   3   3 340.593 45.4057   1
   9  -3  -4 210.218 30.4928   6
   9   3   4 196.240 38.1747   1
   9  -3  -5 442.746 47.8316   6
   9   3   5 368.140 59.7430   1
   9   3   6 1205.14 112.243   4
  -9  -3   6 1221.94 103.562   8
   9   3   6 1294.68 132.639   1
   9   3   7 1027.72 102.137   4
  -9  -3   7 1074.87 90.9613   8
  -9   3  -7 849.721 131.126   7
  -9  -3   7 1045.18 122.568   1
   9   3   7 1108.72 124.885   1
   9   3   8 556.078 66.6068   4
  -9  -3   8 597.935 55.0722   8
  -9  -3   8 512.815 81.6257   1
  -9  -3   9 38.5132 15.7825  10
  -9   3 -10 470.060 59.4471   5
  -9  -3  10 470.104 46.2068  10
  -9   4   9 196.526 29.6693   9
  -9   4   9 218.678 30.9974   8
  -9   4   8 170.000 29.3525   8
  -9   4   8 133.655 26.4752   9
   9  -4   8 135.451 48.9245   1
  -9   4   8 150.588 51.0741   2
  -9   4   7 125.225 25.8748   8
  -9   4   7 112.718 24.6064   9
   9  -4   7 142.507 32.5451   4
   9   4  -6 1156.08 128.248   7
  -9   4   6 1162.24 96.9967   9
   9  -4   6 1259.86 104.294   4
   9   4  -5 291.796 58.8300   7
   9   4  -4 217.343 49.7112   7
   9   4  -3 217.732 46.4247   7
  -9   4   3 194.228 37.9725   2
  -9   4   2 128.862 32.9530   2
  -9   4   1 1532.76 155.472   2
   9   4   0 158.658 25.9807   6
   9   4   1 1287.12 113.945   6
   9  -4  -1 1324.85 112.274   6
   9   4   1 1260.18 139.429   2
   9  -4  -2 210.059 29.3756   6
   9   4   2 271.139 43.0493   6
   9   4   2 209.331 37.9502   2
   9  -4  -3 158.304 25.4678   6
   9  -4  -4 164.304 25.8678   6
   9   4   5 318.443 52.6338   1
   9   4   6 1425.55 123.628   4
   9   4   6 1245.36 140.243   1
   9   4   7 62.0759 27.2839   4
  -9   4  -7 60.2908 45.4824   7
  -9  -4   8 95.3227 39.2106   1
   9   4   8 95.4238 30.0025   4
  -9  -4   9 257.604 31.4287  10
  -9   4 -10 30.0047 30.2724   5
  -9  -4  10 25.7077 10.7265  10
  -9   5  10 102.952 21.0186  10
   9   5  -9 214.406 45.0523   5
  -9   5   9 175.828 27.5343  10
  -9   5   9 175.990 28.5284   8
  -9   5   9 145.496 27.7142   9
  -9   5   8 270.150 35.9356   8
  -9   5   8 263.029 36.2047   9
  -9   5   8 227.047 67.6980   2
   9  -5   8 146.312 55.8442   1
  -9   5   7 1200.48 139.022   2
   9  -5   7 1162.39 102.295   4
  -9   5   7 1089.20 97.6040   8
  -9   5   7 937.937 94.6085   9
   9  -5   6 286.981 55.3229  11
   9  -5   6 362.907 47.1371   4
   9  -5   5 491.728 52.5274   4
   9   5  -5 445.162 74.4721   7
   9   5  -4 118.461 41.3365   7
  -9   5   4 169.359 40.5643   2
  -9   5   3 446.017 61.1421   2
   9   5  -3 438.080 66.1398   7
   9   5  -2 60.3972 33.3919   7
  -9   5   2 60.1585 35.0235   2
   9   5  -1 520.593 53.4230   6
   9   5   0 2352.21 192.308   6
   9   5   1 700.117 69.8821   6
   9  -5  -2 55.4849 19.1890   6
   9   5   2 29.0663 30.0118   6
   9   5   2 26.0797 37.6449   2
   9  -5  -3 468.814 47.6640   6
   9   5   3 535.963 65.0088   2
   9   5   4 218.337 46.9835   2
   9   5   5 461.523 51.1262   4
   9   5   6 353.896 46.2120   4
   9   5   7 1000.46 97.1910   4
  -9   5  -7 850.227 131.807   7
   9   5   7 1196.61 141.384   2
  -9   5  -8 200.929 68.8201   7
   9   5   8 184.051 62.7736   2
  -9  -5   8 176.416 50.3282   1
  -9   5  -9 95.1329 40.6996   5
  -9  -5   9 207.505 25.0116  10
  -9   5 -10 28.8618 35.0035   5
  -9  -5  10 65.9323 12.9600  10
  -9   6  10 130.535 22.5652  10
   9   6  -9 84.0629 43.5788   5
  -9   6   9 62.5424 20.2105   8
  -9   6   9 44.1769 21.6072   9
  -9   6   9 42.1239 18.3307  10
  -9   6   8 81.2370 26.1156   9
   9   6  -8 188.583 47.5607   5
  -9   6   7 478.397 90.4015   2
   9  -6   7 486.282 58.7145   4
  -9   6   7 444.663 55.2758   9
   9   6  -6 304.464 65.0930   7
   9  -6   6 216.156 51.7880  11
  -9   6   6 338.470 70.7579   2
   9  -6   6 337.264 42.8075   4
  -9   6   5 1167.59 135.432   2
   9   6  -5 1153.42 134.043   7
   9  -6   5 1180.80 105.471   4
  -9   6   4 709.030 88.7989   2
   9   6  -4 622.182 88.0176   7
  -9   6   3 2516.59 239.357   2
   9   6  -3 2850.53 241.636   7
  -9   6   2 579.232 87.9379   2
   9   6  -1 504.780 53.1277   6
   9   6   0 44.6843 21.0789   6
   9   6   1 594.885 63.1611   6
   9   6   2 1099.60 96.1361   6
   9   6   2 587.062 102.129   2
   9   6   3 2538.95 230.159   2
   9   6   4 649.340 85.2054   2
   9   6   5 1020.78 95.7811   4
   9   6   5 1236.22 130.719   2
   9   6   6 430.040 51.1664   4
   9   6   6 404.401 79.9527   2
   9   6   7 438.164 51.7762   4
  -9   6  -7 416.880 86.0225   7
   9   6   7 300.352 76.3994   2
  -9   6  -8 61.6234 41.8367   5
  -9   6  -9 34.3148 39.7989   5
  -9  -6   9 39.0146 12.1975  10
  -9   6 -10-6.21064 38.4827   5
  -9   7  10 342.573 36.7739  10
  -9   7   9 466.393 54.5929   9
  -9   7   9 522.993 51.3669  10
  -9   7   8 1545.29 127.974  10
  -9   7   8 1287.12 129.318   9
  -9   7   7 2071.32 232.829   2
   9  -7   7 2277.92 183.873   4
  -9   7   7 2326.58 182.865   8
  -9   7   7 2061.90 181.645   9
   9  -7   7 1625.09 188.094  11
  -9   7   6 2184.25 233.639   2
   9  -7   6 2270.60 188.426   4
   9   7  -6 2073.38 220.555   7
   9  -7   6 1716.27 195.299  11
  -9   7   5 448.407 86.5910   2
   9  -7   5 500.955 57.3679   4
   9   7  -5 706.618 81.0613   5
   9   7  -5 500.154 82.0546   7
   9   7  -4 355.791 63.1818   7
  -9   7   4 331.663 67.0328   2
  -9   7   3 877.706 120.072   2
   9   7  -3 1200.69 119.930   7
  -9   7   2 2692.24 262.922   2
   9   7  -1 1133.54 101.358   6
   9   7   0 2179.21 181.170   6
   9   7   1 1306.81 117.690   6
   9   7   2 3790.31 284.314   6
   9   7   2 2621.82 307.956   2
   9   7   3 951.107 119.439   2
   9   7   4 318.682 64.7156   2
   9   7   5 435.519 44.7012   4
   9   7   5 384.600 74.3189   2
   9   7   6 2064.36 150.683   4
  -9   7  -6 1832.12 187.740   7
   9   7   6 2259.12 210.445   2
   9   7   7 2022.06 148.826   4
  -9   7  -7 1968.92 199.570   7
   9   7   7 1875.26 204.873   2
  -9   7  -8 850.942 107.422   5
  -9   7  -9 199.526 60.8950   5
  -9   7 -10 31.4808 41.5131   5
  -9   8   9 164.352 26.1256   8
  -9   8   9 139.532 29.6929   9
  -9   8   9 145.245 23.1559  10
   9   8  -8 81.4425 62.1716   5
  -9   8   8 120.469 22.7210  10
  -9   8   8 153.953 27.4359   8
  -9   8   8 140.114 32.4915   9
   9   8  -7 781.793 107.549   5
  -9   8   7 452.325 108.595   2
   9  -8   7 415.909 75.0750  11
  -9   8   7 846.474 70.8825   8
  -9   8   7 625.622 68.0091   9
   9   8  -6 168.582 64.5732   7
  -9   8   6 165.756 70.3246   2
  -9   8   6 261.771 34.0858   8
   9  -8   6 211.127 37.2347   4
   9   8  -6 357.352 76.5705   5
  -9   8   5 1740.02 224.963   2
   9   8  -5 2109.66 214.220   7
  -9   8   4 4348.05 412.856   2
   9   8  -4 4714.78 395.444   7
  -9   8   3 1681.93 191.105   2
  -9   8   2 925.623 134.304   2
   9   8  -2 1021.87 110.206   7
   9   8  -1 3082.53 250.416   6
   9   8   0 227.727 34.8726   6
   9   8   1 3065.18 251.361   6
   9   8   2 699.508 121.162   2
   9   8   3 1854.74 207.958   2
   9   8   4 4766.38 305.945   4
   9   8   4 4133.42 362.219   2
   9   8   5 1861.95 128.945   4
   9   8   5 1487.61 179.585   2
  -9   8  -6 84.4439 58.4205   5
   9   8   6 159.929 29.8836   4
  -9   8  -6 127.261 52.3068   7
   9   8   6 119.432 61.3437   2
  -9   8  -7 268.240 79.3097   5
  -9   8  -7 365.801 79.4324   7
   9   8   7 501.834 106.005   2
  -9   8  -8 53.3537 58.9797   5
  -9   8  -9 52.9502 52.3397   5
  -9   8 -10 67.2591 33.1106   5
  -9   9   9 488.089 48.7780   8
  -9   9   9 464.100 54.3651   9
  -9   9   8 1438.82 114.124  10
  -9   9   8 1370.53 115.781   8
  -9   9   8 1411.70 122.245   9
   9  -9   7 2940.10 293.102  11
  -9   9   7 4061.01 281.333  10
  -9   9   7 4389.36 286.805   8
  -9   9   7 4204.56 290.432   9
  -9   9   7 3242.40 364.125   2
  -9   9   6 2363.42 195.185   8
   9   9  -6 2704.91 245.827   7
   9   9  -6 2840.28 258.002   5
  -9   9   5 433.699 109.456   2
   9   9  -5 543.109 85.2803   7
   9   9  -5 330.344 97.5513   5
   9   9  -4 18.4290 60.3159   5
  -9   9   4 359.108 91.4504   2
   9   9  -3 208.017 49.3916   7
  -9   9   3 86.0592 60.3070   2
   9   9  -2 4803.22 382.639   6
   9   9  -2 4741.77 400.886   7
   9   9  -1 2482.16 206.231   6
   9   9   0 908.629 86.4364   6
   9   9   1 2721.72 226.177   6
   9   9   3 69.6451 64.6214   2
  -9   9  -4 71.7995 56.9362   5
   9   9   4 200.471 72.5156   2
  -9   9  -5 247.093 76.7390   5
   9   9   5 453.724 105.832   2
   9   9   6 2284.83 165.758   4
  -9   9  -6 1988.70 207.310   7
   9   9   6 1883.93 239.962   2
  -9   9  -7 3143.07 217.709   7
   9   9   7 3369.20 280.591   2
  -9   9  -8 659.633 109.889   5
  -9   9  -9 76.2413 54.3318   5
  -9  10   9 334.375 42.0215   9
  -9  10   8 176.235 26.0621   8
  -9  10   8 156.130 32.2675   9
  -9  10   7 334.180 38.8000   8
  -9  10   7 302.004 44.0825   9
  -9  10   6 248.289 106.273   2
   9  10  -6 238.642 103.908   5
  -9  10   6 600.700 54.5265   8
   9  10  -6 419.555 86.5832   7
  -9  10   5 359.994 114.996   2
   9  10  -5 301.474 104.864   5
   9  10  -4 942.949 132.397   5
  -9  10   4 634.761 140.463   2
   9  10  -3 1473.63 153.035  12
  -9  10   3 1882.46 147.843   5
   9  10  -3 1867.60 179.816   5
   9  10  -3 1882.37 176.786   7
   9  10  -2 2401.38 234.176  12
   9  10  -2 2987.53 231.478   6
   9  10  -2 2914.04 250.592   7
   9  10  -1 1625.94 142.496   6
   9  10   0 1967.63 167.749   6
   9  10   1 1381.90 125.484   6
   9  10   2 2207.65 194.046  12
   9  10   3 1413.95 148.314  12
   9  10   3 1929.31 146.855   5
  -9  10  -3 1739.10 165.399   5
   9  10   3 1266.25 202.939   2
   9  10   4 792.311 82.6990  12
   9  10   4 529.514 130.466   2
  -9  10  -5 63.0794 77.0272   5
   9  10   5 475.869 122.970   2
  -9  10  -6 406.642 76.2381   7
   9  10   6 286.424 110.687   2
  -9  10  -7 7.68615 82.6214   5
  -9  10  -8 29.3758 58.8938   5
  -9  10  -9 132.086 46.2176   5
  -9  11   9 333.301 39.0766   9
  -9  11   8 513.376 49.9115   8
  -9  11   8 548.283 57.9970   9
   9  11  -8 405.285 83.7335   5
  -9  11   7 742.442 70.0771   8
  -9  11   7 814.231 78.8127   9
   9  11  -7 628.000 121.090   5
  -9  11   6 830.834 74.3506   8
   9  11  -6 621.640 130.271   5
   9  11  -5 1038.16 153.167   5
  -9  11   5 1048.23 88.6280   8
   9  11  -4 438.287 85.0638   7
   9  11  -4 576.716 96.8606   5
  -9  11   4 332.461 111.840   2
   9  11  -3 151.166 50.4950   5
  -9  11   3 167.969 31.6556   5
   9  11  -3 138.716 44.4082  12
   9  11  -3 151.689 34.1201   6
   9  11  -3 154.586 51.3996   7
   9  11  -2 15.3227 29.3302   5
  -9  11   2 37.2958 17.5588   5
   9  11  -2 56.4342 38.9446  12
   9  11  -2 6.69548 18.9607   6
   9  11  -1 666.340 88.9415  12
  -9  11   1 753.570 70.9261   5
   9  11  -1 698.346 77.3116   5
   9  11  -1 779.936 76.4361   6
   9  11   0 644.716 85.1052  12
   9  11   0 731.014 72.6577   6
   9  11   1 508.464 76.9303  12
   9  11   1 690.881 66.7104   5
  -9  11  -1 653.995 67.4852   5
  -9  11  -2-2.50885 25.3338   5
   9  11   2 12.2240 16.5587   5
   9  11   2 40.6308 38.2351  12
  -9  11  -3 167.579 47.4015   5
   9  11   3 229.468 37.0769   5
   9  11   3 136.494 43.5663  12
   9  11   4 244.013 103.299   2
  -9  11  -4 501.506 83.7806   5
  -9  11  -4 411.353 74.7136   7
   9  11   4 400.228 58.8504  12
   9  11   5 382.681 135.570   2
  -9  11  -5 791.400 119.000   5
   9  11   6 260.364 124.611   2
  -9  11  -6 525.789 89.8003   7
  -9  11  -6 505.377 108.216   5
  -9  11  -7 561.037 112.784   5
  -9  11  -8 434.676 81.1371   5
  -9  11  -9 180.386 38.2147   5
  -9  12   9 107.665 20.7648   9
  -9  12   8 151.568 29.7157   9
  -9  12   7 31.1761 14.5560   8
   9  12  -7-10.7474 53.4615   5
  -9  12   6 555.452 54.4377   8
   9  12  -6 521.352 105.433   5
  -9  12   5-57.3598 91.8882   2
   9  12  -5 56.7639 64.6175   5
  -9  12   5 23.2484 15.0944   8
   9  12  -4 31.1211 50.8051   5
   9  12  -4 23.2436 35.9470  12
   9  12  -4-6.14220 39.4078   7
   9  12  -4 52.5606 27.8318   6
   9  12  -3 1914.10 191.938   5
   9  12  -3 1848.34 182.846  12
  -9  12   3 2151.92 175.896   5
   9  12  -3 2180.03 183.414   6
   9  12  -2 356.547 56.9174   5
   9  12  -2 290.548 64.0028  12
  -9  12   2 379.746 45.7075   5
   9  12  -2 405.999 51.8219   6
   9  12  -1 271.093 61.7647  12
   9  12  -1 388.648 47.7234   6
  -9  12   1 325.044 40.5773   5
   9  12  -1 297.491 47.5438   5
   9  12   0 537.278 82.1066  12
   9  12   0 590.124 66.7476   5
  -9  12   0 709.154 64.8841   5
  -9  12   0 549.449 74.9312   7
   9  12   1 319.529 41.0889   5
  -9  12  -1 292.433 39.8570   5
   9  12   2 338.029 60.1882  12
   9  12   2 441.128 50.2655   5
  -9  12  -2 323.202 50.4731   5
  -9  12  -2 372.549 66.3363   7
   9  12   3 1756.11 177.824  12
   9  12   3 2160.60 175.309   5
  -9  12  -3 1927.07 182.379   5
  -9  12  -3 2188.02 203.028   7
  -9  12  -4 40.3497 43.3347   5
  -9  12  -4 45.2072 38.9720   7
   9  12   4 58.5232 36.9100  12
   9  12   5-28.2794 77.9689   2
  -9  12  -5 30.2565 38.7701   7
  -9  12  -5-34.3484 53.7570   5
  -9  12  -6 267.692 78.6593   5
  -9  12  -7 31.7192 51.7938   5
  -9  12  -8 118.859 43.4494   5
  -9  12  -9 45.3904 19.9158   5
   9  13  -7 346.329 66.9519   5
   9  13  -6 20.2012 49.0559   5
   9  13  -5 46.3219 50.7296   5
   9  13  -5 94.3569 35.0363   6
   9  13  -4 72.1099 46.6251   5
   9  13  -4 21.6073 38.5657  12
   9  13  -4 50.2814 29.7172   6
   9  13  -3 105.506 41.3623   5
  -9  13   3 125.805 30.0511   5
   9  13  -3 176.254 50.0250  12
   9  13  -3 139.615 34.6902   6
   9  13  -2 69.6889 35.0618   5
  -9  13   2 91.1976 25.0407   5
   9  13  -2 88.7814 47.5009  12
   9  13  -2 71.4045 26.8191   6
   9  13  -1 160.468 51.9033  12
   9  13  -1 86.6469 30.3500   5
  -9  13   1 110.690 26.2874   5
   9  13   0 91.5270 50.4702  12
   9  13   0 78.8440 26.5374   5
  -9  13   0 88.7711 25.5002   5
   9  13   1 125.735 49.1852  12
  -9  13  -1 116.351 40.1929   7
  -9  13  -1 80.7973 26.4447   5
   9  13   1 131.951 30.2060   5
   9  13   2 98.2592 49.1020  12
  -9  13  -2 73.3698 40.2846   7
  -9  13  -2 114.097 30.6077   5
   9  13   2 104.000 28.9748   5
   9  13   3 87.7288 42.2454  12
  -9  13  -3 54.7911 39.9291   7
  -9  13  -3 79.8411 35.9140   5
   9  13   3 109.330 31.9624   5
   9  13   4 37.7015 38.0977  12
  -9  13  -4 109.526 40.4257   5
  -9  13  -4 70.8873 42.8130   7
  -9  13  -5 33.0204 46.6986   5
  -9  13  -5 66.5612 41.0564   7
  -9  13  -6 38.7052 46.6845   5
  -9  13  -7 273.495 58.7712   5
  -9  13  -8 70.5592 31.3404   5
  -9  14   8 45.9286 16.5516   9
  -9  14   7 51.6913 20.7213   9
   9  14  -6 598.426 83.2583   5
  -9  14   6 573.439 61.2255   9
   9  14  -5 396.275 70.1863   5
   9  14  -4 848.027 104.763   5
   9  14  -4 877.239 98.5441  12
   9  14  -4 928.604 99.5602   6
   9  14  -3 716.682 85.8991   5
   9  14  -3 637.616 87.4328  12
   9  14  -3 733.035 82.3440   6
   9  14  -2 243.246 59.2700  12
   9  14  -2 181.756 42.1741   5
  -9  14   2 210.823 34.8300   5
   9  14  -1 74.3761 51.0616  12
   9  14  -1 43.6859 27.3232   5
  -9  14   1 70.7435 24.0774   5
   9  14   0 22.6421 51.7494  12
   9  14   0 39.7401 24.8043   5
  -9  14   0 66.0689 23.0143   5
   9  14   1 21.7670 47.7289  12
  -9  14  -1 47.4049 25.7460   5
   9  14   1 73.1185 27.7373   5
   9  14   2 192.014 55.0341  12
  -9  14  -2 76.2079 39.7781   7
  -9  14  -2 162.914 34.6942   5
   9  14   2 178.813 34.9399   5
   9  14   3 661.445 85.3478  12
  -9  14  -3 673.236 100.318   7
  -9  14  -3 655.527 78.2411   5
   9  14   4 751.268 90.9933  12
  -9  14  -4 741.928 109.396   7
  -9  14  -4 768.035 91.2743   5
  -9  14  -5 412.995 68.8505   5
  -9  14  -6 450.007 69.6467   5
  -9  14  -7 21.4914 29.4863   5
  -9  14  -8 27.7543 18.9393   5
  -9  15   7 390.465 41.8135   9
  -9  15   6 212.527 31.7020   9
   9  15  -6 203.820 45.2216   5
   9  15  -5 53.0202 33.4372   5
   9  15  -4 214.434 49.1283   5
   9  15  -4 199.502 47.2765  12
   9  15  -3 167.883 42.9527   5
   9  15  -3 188.197 53.2782  12
   9  15  -2 585.600 87.2313  12
  -9  15   2 581.245 62.9806   5
   9  15  -2 511.498 68.0762   5
   9  15  -1 589.470 89.0033  12
  -9  15   1 517.400 57.2767   5
   9  15  -1 429.277 59.1720   5
  -9  15   0 160.060 31.2683   5
   9  15   0 158.816 34.5536   5
   9  15   0 238.326 66.2014  12
  -9  15  -1 387.184 49.9817   5
   9  15   1 402.105 52.9072   5
   9  15   2 488.341 78.2001  12
   9  15   2 502.856 61.8516   5
  -9  15  -2 511.670 61.4768   5
   9  15   3 72.7380 47.6250  12
  -9  15  -3 134.012 49.9427   7
  -9  15  -3 200.628 38.3365   5
   9  15   4 187.238 52.4423  12
  -9  15  -4 265.789 47.6332   5
  -9  15  -5 27.6439 33.0830   5
  -9  15  -6 142.949 37.1296   5
  -9  15  -7 318.440 44.2017   5
  -9  16   7 204.860 24.6391   9
   9 -16   6 588.645 81.1067  11
  -9  16   6 825.403 69.5137   9
   9  16  -5 416.282 57.2331   5
   9  16  -4 514.561 71.1892  12
   9  16  -4 546.700 67.9177   5
   9  16  -3 1984.82 176.878  12
   9  16  -3 1785.49 167.749   5
   9  16  -2 1856.98 178.470  12
   9  16  -2 1788.61 163.738   5
  -9  16   2 1852.52 159.898   5
   9  16  -1 246.505 42.0906   5
   9  16  -1 228.073 71.3353  12
  -9  16   1 319.169 42.0007   5
   9  16   0 457.719 81.0219  12
  -9  16   0 357.191 48.0958   5
   9  16   0 411.616 53.1295   5
  -9  16  -1 266.437 41.1188   5
   9  16   1 316.568 46.2570   5
   9  16   2 1859.13 182.437  12
  -9  16  -2 1809.57 164.167   5
   9  16   2 1979.21 168.069   5
   9  16   3 1792.36 173.443  12
  -9  16  -3 1880.32 163.874   5
  -9  16  -4 596.198 69.7336   5
  -9  16  -5 338.998 51.1333   5
  -9  16  -6 654.799 69.9136   5
  -9  16  -7 94.6339 20.6452   5
   9 -17   6 589.077 67.9236  11
  -9  17   5 964.869 83.9403   9
   9  17  -4 215.681 47.6597  12
   9  17  -4 229.530 40.5935   5
   9  17  -3 558.266 80.0459  12
   9  17  -3 640.355 70.4563   5
   9  17  -2 353.523 75.1216  12
  -9  17   2 387.914 49.8233   5
   9  17  -2 428.567 53.7570   5
   9  17  -1 469.615 81.1666  12
   9  17  -1 344.478 49.9149   5
  -9  17   1 402.509 48.8954   5
   9  17   0 2113.65 197.276  12
   9  17   0 1851.01 168.541   5
  -9  17   0 1981.22 167.183   5
  -9  17  -1 385.240 46.7092   5
   9  17   1 337.378 48.3086   5
   9  17   2 454.872 76.0583  12
   9  17   2 367.503 51.6069   5
  -9  17  -2 396.143 50.0136   5
   9  17   3 450.947 74.8666  12
  -9  17  -3 602.299 64.0428   5
  -9  17  -4 222.316 37.8608   5
  -9  17  -5 880.917 85.8899   5
  -9  17  -6 513.462 53.0826   5
   9  18  -4 195.023 44.4573  12
   9  18  -3 950.049 103.389  12
   9  18  -3 928.906 90.6201   5
   9  18  -2 918.157 105.632  12
   9  18  -2 816.816 83.9845   5
   9  18  -1 866.246 102.256  12
   9  18  -1 677.094 73.5869   5
  -9  18   1 688.715 72.3440   5
   9  18   0 1512.76 144.599  12
  -9  18   0 1192.60 113.335   5
   9  18   0 1255.35 116.390   5
  -9  18  -1 812.633 73.6243   5
   9  18   1 615.410 73.1384   5
   9  18   2 791.184 98.2921  12
  -9  18  -2 749.554 75.2211   5
   9  18   3 1107.95 109.802  12
  -9  18  -3 958.335 93.9000   5
  -9  18  -4 283.020 39.0869   5
  -9  18  -5 342.357 40.2488   5
   9 -19   5 382.125 51.7747  11
   9  19  -3 33.3393 39.6051  12
   9  19  -2 358.136 64.8749  12
  -9  19   1 330.409 42.6246   5
   9  19  -1 329.580 43.9199   5
  -9  19   0 690.667 68.3071   5
   9  19   0 605.191 68.6409   5
  -9  19  -1 349.081 41.3722   5
   9  19   1 304.105 43.8617   5
   9  19   2 276.944 58.9441  12
  -9  19  -2 206.013 31.8843   5
  -9  19  -3 15.6447 17.0437   5
  -9  19  -4 145.813 25.4524   5
  -9  19  -5 284.679 30.8197   5
   9  20  -3 146.725 39.6983  12
   9  20  -2 26.1746 40.1704  12
   9  20  -1 488.579 73.5793  12
   9  20   0 235.785 58.1822  12
  -9  20   0 177.989 28.9506   5
  -9  20  -1 276.539 35.7290   5
   9  20   2 76.7161 41.8519  12
  -9  20  -2 19.5778 15.5889   5
  -9  20  -3 163.763 24.5138   5
   9  21  -2 76.2825 37.1836  12
   9  21  -1 159.890 46.6361  12
   9 -21   1 103.427 26.4581  11
   9  21   0 9.61959 40.9872  12
  -9  21  -1 41.1657 15.6741   5
   9  21   1 94.5070 43.3078  12
  -9  21  -2 47.6286 14.6950   5
   9  21   2 79.9849 38.2344  12
  10   0   0 1083.41 95.3055   6
  10   0  -1 1503.37 125.909   6
  10   0   1 1461.25 129.070   6
  10   0  -2 86.4061 23.3886   6
  10   0   2 77.6158 18.5871   1
 -10   0   2 96.5633 16.5136   1
  10   0  -3 332.629 41.2380   6
  10   0   3 290.373 43.3322   1
 -10   0   3 358.793 43.3960   1
 -10   0   4 96.2708 28.5267   1
  10   0   4 102.057 30.7744   1
  10   0   5 212.499 41.9908   1
 -10   0   5 181.215 37.3449   1
  10   0   6 340.515 46.3943   4
 -10   0   6 288.527 50.6261   1
  10   0   6 300.508 57.5884   1
  10   0  -7 2.46480 18.9805   6
  10   0   7 24.7656 28.7161   4
 -10   0   7 10.8836 16.0908   8
 -10   0   7 10.6177 12.8956   9
  10   0   7-33.2522 44.2212   1
 -10   0   7-28.3980 34.6564   1
  10   0   8 200.157 39.1494   4
 -10   0   8 148.593 25.5030   8
 -10   0   8 135.628 22.5756   9
  10   0   8 117.893 45.3949   1
 -10   0   8 107.914 40.7633   1
 -10   0   9 20.6900 14.7869   8
 -10   0  10 42.1176 17.3184  10
 -10   1  10 103.312 22.1667  10
 -10   1   9 67.7451 20.0152   8
  10  -1   8 229.654 42.4806   4
 -10   1   8 201.759 28.7721   9
 -10   1   8 271.205 33.4174   8
 -10   1   8 166.790 47.7708   1
  10  -1   8 180.302 52.4588   1
  10  -1   7 200.961 58.0016   1
 -10   1   7 207.906 51.6290   1
 -10   1   7 320.585 37.0432   8
 -10   1   7 264.272 33.3013   9
  10  -1   7 330.143 46.6243   4
  10  -1   6 529.937 78.1600   1
 -10   1   6 605.622 75.0718   1
 -10   1   6 536.224 51.7454   9
  10  -1   6 516.668 60.4001   4
 -10   1   5 876.754 93.7668   1
 -10   1   4 383.845 50.8666   1
  10   1  -3 677.176 68.4615   6
 -10   1   3 689.238 67.9861   1
  10   1  -2 1217.50 107.065   6
  10   1  -1 1239.24 80.8479   6
  10  -1   1 1193.70 85.0932   6
  10   1   0 454.396 48.5437   6
  10  -1   0 478.455 49.7672   6
  10  -1  -1 951.567 84.9126   6
  10  -1  -2 1374.29 111.874   6
  10   1   2 1210.02 105.556   1
  10  -1  -3 797.800 74.3162   6
  10   1   3 717.122 74.2059   1
  10  -1  -4 448.252 51.1002   6
  10   1   4 415.622 55.7477   1
  10  -1  -5 845.700 82.9741   6
 -10  -1   5 805.433 90.9894   1
  10   1   5 826.662 92.8676   1
  10  -1  -6 518.003 60.5963   6
 -10  -1   6 560.375 73.1188   1
  10   1   6 520.893 75.0648   1
 -10  -1   7 344.999 38.9201   8
  10   1   7 244.072 57.0722   1
 -10  -1   7 268.460 55.5410   1
 -10  -1   8 306.379 35.1151   8
  10   1   8 219.449 57.2699   1
 -10  -1   8 262.541 55.2011   1
 -10  -1   9 43.9468 15.3946   8
 -10  -1  10 65.7240 17.5690  10
 -10   2  10 315.063 37.7518  10
 -10   2   9 547.918 55.7847   8
  10   2  -8 105.057 32.2335   6
  10  -2   8 60.8062 36.6496   1
 -10   2   8 122.905 25.8039   8
 -10   2   8 94.8935 21.6053   9
  10  -2   8 86.6037 30.7754   4
  10  -2   7 40.9934 37.2599   1
 -10   2   7 45.4669 29.3635   1
 -10   2   7 105.064 23.1029   8
 -10   2   7 74.6498 19.1838   9
  10  -2   7 67.1086 28.0404   4
 -10   2   6 103.389 34.3322   1
 -10   2   6 127.591 21.9563   9
  10  -2   6 108.468 29.9822   4
 -10   2   5 890.115 96.0880   1
 -10   2   4 1704.47 152.621   1
 -10   2   3 1808.75 153.840   1
  10   2  -2 1040.39 96.1191   6
 -10   2   2 1120.05 95.7800   2
  10   2  -1 892.516 81.4846   6
  10  -2   0 983.798 89.0917   6
  10  -2  -1 779.027 71.8183   6
  10  -2  -2 863.064 79.8679   6
  10  -2  -3 2063.10 166.539   6
  10   2   3 1892.57 166.632   1
  10  -2  -4 1703.70 145.974   6
  10   2   4 1691.94 153.304   1
  10  -2  -5 865.399 82.5642   6
  10   2   5 826.112 94.0746   1
  10  -2  -6 109.089 26.0005   6
  10   2   6 101.236 29.5161   4
 -10  -2   6 101.477 19.3411   8
  10   2   6 32.7069 30.6977   1
 -10  -2   6 131.847 38.6426   1
 -10   2  -7 44.4877 41.7559   7
 -10  -2   7 66.8391 18.4638   8
 -10  -2   7 62.6246 33.3264   1
  10   2   7 75.1741 38.3049   1
 -10  -2   8 129.079 21.5632   8
  10   2   8 62.5176 38.3200   1
 -10  -2   8 70.5210 33.2941   1
 -10  -2   9 448.721 44.6388   8
 -10   2 -10 205.859 38.2611   5
 -10  -2  10 242.231 29.4428  10
 -10   3  10 335.840 39.1303  10
 -10   3   9 176.498 27.6319   8
 -10   3   9 136.974 23.0725   9
  10  -3   8 462.067 54.8109   4
  10   3  -8 361.540 59.3153   6
 -10   3   8 410.044 45.0017   9
 -10   3   8 445.249 48.7426   8
  10  -3   8 293.798 67.5470   1
  10  -3   7 2943.20 297.336   1
 -10   3   7 3682.84 267.667   8
 -10   3   7 3089.48 262.598   9
  10  -3   7 3299.41 272.081   4
 -10   3   6 1422.59 141.929   1
 -10   3   6 1323.57 116.712   9
  10  -3   6 1473.41 125.727   4
 -10   3   5 231.966 43.3447   1
 -10   3   4 594.012 68.1821   1
  10   3  -2 2215.49 176.329   6
 -10   3   2 2009.55 179.279   2
  10  -3   0 168.013 28.8058   6
  10  -3  -1 1836.22 149.097   6
  10   3   1 1714.73 151.084   6
  10  -3  -2 2314.48 190.656   6
  10   3   2 2364.76 195.008   2
  10  -3  -3 88.5503 22.7965   6
  10  -3  -4 698.057 66.3540   6
  10   3   4 597.919 72.1780   1
  10  -3  -5 118.707 25.3305   6
  10   3   5 129.925 34.6407   1
  10   3   6 1517.98 135.079   4
 -10  -3   6 1510.45 124.641   8
  10   3   6 1447.94 151.631   1
  10   3   7 3577.80 279.532   4
 -10  -3   7 3439.80 266.635   8
 -10   3  -7 2959.97 313.557   7
 -10  -3   7 2991.53 293.107   1
  10   3   7 3321.19 299.287   1
 -10  -3   8 524.019 52.0418   8
  10   3   8 614.541 67.9066   4
 -10   3 -10 237.867 43.8780   5
 -10  -3  10 264.569 29.5814  10
 -10   4   9 219.649 30.5016   9
 -10   4   9 242.549 33.4919   8
 -10   4   8 188.478 29.4270   9
 -10   4   8 174.079 30.3229   8
 -10   4   8 187.899 52.8842   2
  10  -4   8 129.643 47.6384   1
  10  -4   8 193.725 35.9527   4
 -10   4   7 41.7346 20.2815   8
 -10   4   7 22.8826 17.3020   9
  10  -4   7 12.3228 22.7370   4
  10  -4   6 64.2686 24.2185   4
 -10   4   6 85.5503 20.2581   9
  10  -4   6 34.7158 35.2428  11
 -10   4   3 2531.54 217.281   2
  10   4  -2 2275.34 184.884   6
 -10   4   2 2148.95 195.848   2
  10   4   0 975.091 88.5226   6
  10   4   1 1237.65 116.136   6
  10  -4  -1 1379.96 115.283   6
  10  -4  -2 2376.85 197.018   6
  10   4   2 2782.65 214.598   6
  10   4   2 2220.11 208.472   2
  10  -4  -3 2123.47 180.720   6
  10   4   3 2370.37 193.742   2
  10  -4  -4 828.228 76.9318   6
  10   4   6 110.308 29.8334   4
  10   4   7 24.1668 25.4742   4
 -10   4  -7 34.6746 48.4035   7
 -10  -4   7 18.0864 30.5885   1
  10   4   8 165.257 57.7429   2
  10   4   8 152.661 35.6599   4
 -10   4  -9 84.5868 37.2148   5
 -10  -4   9 217.078 26.5015  10
 -10   4 -10 128.720 42.2091   5
 -10  -4  10 255.889 26.6536  10
 -10   5  10 144.410 23.8163  10
 -10   5   9 477.339 52.5103   8
 -10   5   9 557.148 54.1513  10
 -10   5   9 481.793 51.3459   9
 -10   5   8 1501.94 137.472   8
 -10   5   8 1407.87 135.573   9
 -10   5   7 835.473 113.263   2
  10  -5   7 785.754 79.7299   4
 -10   5   7 821.889 76.9694   8
 -10   5   7 707.172 74.1506   9
  10  -5   6 1910.41 159.756   4
  10  -5   6 1545.65 165.510  11
  10  -5   5 1056.85 121.877  11
  10  -5   5 1295.91 113.212   4
  10   5  -5 1251.56 140.284   7
  10   5  -4 228.763 52.3073   7
 -10   5   4 256.144 48.3483   2
 -10   5   3 2298.27 206.028   2
 -10   5   2 127.425 46.4369   2
  10   5  -1 2663.95 217.066   6
  10   5   0 82.7171 23.5565   6
  10   5   1 2955.14 242.057   6
  10   5   2 234.409 48.0700   6
  10  -5  -2 193.363 30.2193   6
  10   5   2 175.143 51.4312   2
  10  -5  -3 2010.51 169.990   6
  10   5   3 2249.23 190.281   2
  10   5   4 261.251 50.3407   2
  10   5   5 1725.79 174.287   2
  10   5   6 2414.60 206.410   4
  10   5   6 2614.83 244.401   2
  10   5   7 789.668 80.0187   4
 -10   5  -7 661.729 114.498   7
  10   5   7 757.526 113.033   2
 -10   5  -8 643.112 80.3270   5
 -10   5  -9 235.906 54.0977   5
 -10  -5   9 406.950 38.8441  10
 -10   5 -10 56.0889 38.9610   5
 -10  -5  10 118.548 16.3988  10
 -10   6  10 597.030 57.0218  10
 -10   6   9 230.783 32.2569   8
 -10   6   9 206.333 30.1364  10
 -10   6   9 229.287 32.9654   9
 -10   6   8 464.015 51.4688   8
 -10   6   8 381.225 49.5390   9
  10   6  -8 490.943 74.2638   5
 -10   6   7 167.987 57.3352   2
  10  -6   7 195.968 34.7629   4
 -10   6   7 148.212 31.5047   9
  10  -6   6 669.338 71.0832   4
 -10   6   6 651.476 100.852   2
  10  -6   6 527.569 79.7735  11
 -10   6   5 651.622 97.2845   2
  10   6  -5 725.546 98.7148   7
  10  -6   5 656.713 71.8986   4
 -10   6   4 821.505 102.794   2
  10   6  -4 886.649 106.180   7
 -10   6   3 2660.36 255.409   2
  10   6  -3 3038.71 256.567   7
  10   6  -2 3271.43 246.081   6
 -10   6   2 2377.98 268.475   2
  10   6  -1 538.735 56.7662   6
  10   6   0 288.175 39.2572   6
  10   6   1 682.484 70.9988   6
  10   6   2 4816.15 322.804   6
  10   6   2 2608.00 324.516   2
  10   6   3 2924.67 263.124   2
  10   6   4 905.928 107.549   2
  10   6   5 749.347 65.4858   4
  10   6   5 857.528 99.4197   2
  10   6   6 679.893 63.6406   4
  10   6   6 613.291 95.3015   2
  10   6   7 157.218 33.7273   4
 -10   6  -7 63.6062 40.4391   5
 -10   6  -7 126.873 56.5567   7
  10   6   7 223.422 62.8940   2
 -10   6  -8 171.458 51.0684   5
 -10   6  -9 83.0431 45.7429   5
 -10  -6   9 206.087 23.9522  10
 -10   6 -10 114.900 45.1919   5
 -10   7  10 41.2794 14.5938  10
 -10   7   9 280.162 38.4960   9
 -10   7   9 287.864 34.4652  10
  10   7  -8 1188.61 123.246   5
 -10   7   8 821.322 86.6541   9
  10  -7   7 709.562 67.6957   4
  10  -7   7 425.598 73.8759  11
 -10   7   7 629.865 65.0712   8
 -10   7   7 544.079 64.5087   9
 -10   7   7 535.276 102.611   2
  10  -7   6 248.733 56.0701  11
 -10   7   6 203.140 67.4738   2
  10  -7   6 316.782 43.1486   4
 -10   7   5 1384.48 181.538   2
  10   7  -5 1724.46 182.319   7
  10  -7   5 1701.48 151.242   4
 -10   7   4 607.246 98.6336   2
  10   7  -4 859.592 100.293   7
 -10   7   3 427.404 85.4579   2
  10   7  -3 651.533 80.8316   7
  10   7  -2 406.886 47.1635   6
 -10   7   2 282.677 73.0011   2
  10   7  -1 2140.51 179.169   6
  10   7   0 1505.36 131.625   6
  10   7   1 1790.31 155.494   6
  10   7   2 430.308 57.6546   6
  10   7   2 192.244 74.1457   2
  10   7   3 511.974 89.9561   2
  10   7   4 674.304 97.2373   2
  10   7   5 1638.12 114.116   4
  10   7   5 1443.74 156.505   2
  10   7   6 383.908 44.4171   4
  10   7   6 336.763 78.3472   2
  10   7   7 619.055 59.0262   4
 -10   7  -7 469.979 91.5838   7
  10   7   7 411.096 94.7943   2
 -10   7  -8 504.890 84.9990   5
 -10   7  -9 27.3289 43.1062   5
 -10   8   9 64.2013 18.2991   8
 -10   8   9 34.9915 21.8842   9
 -10   8   9 47.6752 14.7060  10
  10   8  -8-32.9606 60.2127   5
 -10   8   8 14.3095 14.0217  10
 -10   8   8 12.2124 17.7875   8
 -10   8   8 24.0177 24.7002   9
  10   8  -7 199.988 74.6089   5
  10  -8   7 118.937 45.0486  11
 -10   8   7 223.712 34.2394   8
 -10   8   7 184.771 36.9661   9
 -10   8   7 185.587 72.8478   2
  10  -8   6 151.167 47.8869  11
 -10   8   6 168.966 74.2608   2
  10  -8   6 255.238 36.3072   4
  10   8  -6 82.2501 68.8276   5
 -10   8   5 441.431 95.2258   2
  10   8  -5 562.305 99.2520   5
  10   8  -5 598.218 91.2893   7
  10   8  -4 51.5978 55.9593   5
  10   8  -4 54.2540 37.1915   7
 -10   8   4 45.4356 42.9606   2
 -10   8   3 333.136 84.9827   2
  10   8  -2 1698.58 147.725   6
  10   8  -1 245.555 35.8088   6
  10   8   0 636.742 66.2041   6
  10   8   1 304.637 43.0584   6
  10   8   3 370.016 93.4846   2
 -10   8  -4 16.3663 40.7559   5
  10   8   4 94.5766 21.0192   4
  10   8   4 45.5679 47.1634   2
  10   8   5 660.834 58.2328   4
  10   8   5 513.049 105.348   2
  10   8   6 239.136 35.5292   4
 -10   8  -6 208.549 59.1862   7
  10   8   6 293.704 85.0142   2
 -10   8  -7 93.5772 61.7477   5
 -10   8  -7 117.789 49.9003   7
  10   8   7 152.935 70.3068   2
 -10   8  -8-10.4337 53.8231   5
 -10   8  -9 12.5087 47.6861   5
 -10   8 -10 27.5460 20.2860   5
 -10   9   9 16.6970 14.1649   8
 -10   9   9 5.85192 19.4531   9
 -10   9   8 19.5131 17.8256   8
 -10   9   8 12.4456 26.7345   9
  10  -9   7 287.520 55.6169  11
 -10   9   7 352.603 41.7688   8
 -10   9   7 231.246 44.1213   9
 -10   9   6 363.871 107.872   2
  10   9  -6 308.215 101.447   5
 -10   9   6 514.821 52.4008   8
  10   9  -5 391.533 77.0366   7
 -10   9   5 282.079 93.0685   2
  10   9  -5 210.256 86.8930   5
 -10   9   4 29.1762 74.9301   2
  10   9  -4 36.2962 60.1898   5
  10   9  -3 27.4185 32.4841   7
 -10   9   3 60.0543 54.0082   2
  10   9  -2 880.876 86.9614   6
  10   9  -1 639.797 67.7164   6
  10   9   0 260.454 38.6717   6
  10   9   1 657.427 70.9101   6
  10   9   3 17.8034 55.9827   2
 -10   9  -4 14.9571 47.0002   5
  10   9   4 19.6453 55.6558   2
  10   9   4 87.2226 34.0489  12
  10   9   5 246.314 93.3339   2
 -10   9  -5 169.831 70.4895   5
  10   9   6 231.231 90.4816   2
 -10   9  -6 229.850 67.5311   7
  10   9   6 400.492 44.3961   4
 -10   9  -6 236.064 85.0414   5
 -10   9  -7 249.703 66.6292   7
 -10   9  -7 178.815 82.1772   5
 -10   9  -8-28.6474 63.2241   5
 -10   9  -9-37.0988 41.6799   5
 -10  10   9 148.569 26.4798   9
 -10  10   9 127.657 21.1823   8
 -10  10   8 355.506 39.2593   8
 -10  10   8 346.719 48.5732   9
 -10  10   7 282.326 46.2600   9
 -10  10   7 328.651 40.2163   8
 -10  10   6 103.881 85.6055   2
 -10  10   6 177.985 28.5497   8
  10  10  -6 54.8454 82.3223   5
 -10  10   5 317.715 103.646   2
  10  10  -5 545.571 83.7432   7
  10  10  -4 208.343 73.7101   5
 -10  10   4 220.107 89.4162   2
  10  10  -3 25.3043 39.9507   5
  10  10  -3 20.3641 33.3740  12
  10  10  -3 2.49301 21.0893   6
  10  10  -2 444.958 54.3012   6
  10  10  -1 869.006 85.9591   6
  10  10   0 451.542 53.5884   6
  10  10   1 913.567 92.0474   6
 -10  10  -3 23.2897 30.4630   5
  10  10   3 17.2488 31.9031  12
 -10  10  -4 268.714 65.2832   5
  10  10   4 273.384 49.2989  12
  10  10   4 156.494 91.4043   2
 -10  10  -5-6.33869 62.6452   5
  10  10   5 260.191 105.913   2
 -10  10  -6-57.9807 77.0213   5
 -10  10  -6 131.255 53.0490   7
  10  10   6 79.8514 85.4001   2
 -10  10  -7 6.78399 68.9791   5
 -10  10  -8 97.0574 55.0093   5
 -10  10  -9 41.0607 31.6714   5
 -10  11   9 552.776 53.5206   9
 -10  11   8 338.802 37.0340   8
 -10  11   8 358.224 46.4436   9
  10  11  -7 24.0628 60.2942   5
 -10  11   7 26.9325 16.4854   8
 -10  11   7 27.7500 26.5152   9
 -10  11   6-13.5872 74.9825   2
  10  11  -6 21.2048 63.5192   5
 -10  11   6 50.0969 18.5860   8
  10  11  -6 27.8571 26.9812   6
  10  11  -5 469.469 97.0710   5
 -10  11   5 278.043 107.278   2
  10  11  -4 9.98868 33.5903  12
  10  11  -4-3.02121 25.2681   6
  10  11  -4 47.5508 50.8813   5
 -10  11   4-11.7280 63.0340   2
  10  11  -3 186.752 51.2711   5
  10  11  -3 150.135 47.6877  12
  10  11  -3 220.816 38.4979   6
  10  11  -2 13.9431 26.8547   5
 -10  11   2-1.49134 15.3848   5
  10  11  -2-2.97083 42.8750  12
  10  11  -2-2.37454 19.4210   6
  10  11  -1 247.879 40.6472   5
  10  11  -1 282.970 59.1663  12
  10  11  -1 331.802 44.4399   6
  10  11   0 1876.62 180.008  12
  10  11   0 1947.70 166.192   6
  10  11   0 1907.40 162.930   5
  10  11   1 220.130 56.6219  12
  10  11   1 313.854 39.4946   5
 -10  11  -2 6.69892 19.8787   5
  10  11   2 23.8202 18.3157   5
  10  11   2-5.71378 37.7883  12
 -10  11  -3 203.714 43.5102   5
  10  11   3 92.9064 43.0210  12
  10  11   4 11.9213 65.7453   2
 -10  11  -4-26.0475 40.0713   5
 -10  11  -4-16.2800 33.4730   7
  10  11   4-9.86291 33.3220  12
  10  11   5 254.525 110.422   2
 -10  11  -5 414.757 84.3467   5
  10  11   6 83.7389 86.0828   2
 -10  11  -6 31.1153 36.8933   7
 -10  11  -6 19.0157 61.5959   5
 -10  11  -7 44.9589 55.1057   5
 -10  11  -8 219.699 55.2307   5
 -10  11  -9 213.690 33.9753   5
 -10  12   8 241.556 35.5667   9
 -10  12   7 72.8744 17.3449   8
 -10  12   7 49.1487 25.7827   9
 -10  12   6 1224.66 104.520   8
  10  12  -6 1076.13 142.262   5
  10  12  -5 780.583 94.3797   6
  10  12  -5 849.162 118.753   5
 -10  12   5 847.201 75.9684   8
  10  12  -4 338.126 72.8848   5
  10  12  -4 319.805 57.9550  12
  10  12  -4 439.154 60.2963   6
  10  12  -3 955.832 109.314   5
  10  12  -3 838.299 105.492  12
  10  12  -3 1199.46 106.500   6
  10  12  -2 506.663 79.6888  12
 -10  12   2 589.703 61.9656   5
  10  12  -2 785.489 75.2510   6
  10  12  -2 562.144 72.9187   5
  10  12  -1 39.4638 24.5982   5
 -10  12   1 28.8852 16.8352   5
  10  12  -1 3.37856 46.0761  12
  10  12  -1 38.9688 24.5963   6
  10  12   0 35.8765 21.7523   5
 -10  12   0 55.1286 20.2102   5
  10  12   0 47.8483 43.9356  12
 -10  12  -1 17.9067 19.9251   5
  10  12   1 19.7461 18.9676   5
  10  12   1 23.0332 40.5981  12
 -10  12  -2 570.174 69.9755   5
  10  12   2 568.396 85.1602  12
  10  12   2 805.999 71.6936   5
  10  12   3 827.916 97.3265  12
 -10  12  -3 848.646 112.182   7
 -10  12  -3 944.544 96.4317   5
  10  12   4 243.123 51.7420  12
 -10  12  -4 273.290 62.9330   7
 -10  12  -4 294.130 57.6792   5
 -10  12  -5 638.564 102.727   7
 -10  12  -5 822.306 105.079   5
 -10  12  -6 848.758 115.167   5
 -10  12  -7 12.7371 39.8801   5
 -10  12  -8 155.954 39.1791   5
  10  13  -6 146.736 53.0492   5
  10  13  -5 4.50231 45.4526   5
  10  13  -5 16.7920 24.5214   6
  10  13  -4 205.963 50.9234  12
  10  13  -4 229.457 48.4967   6
  10  13  -4 197.134 52.1762   5
 -10  13   4 281.882 31.3292   8
  10  13  -3 29.5541 33.6091   5
  10  13  -3 64.0371 44.4953  12
  10  13  -3 60.9638 29.5505   6
 -10  13   2 605.664 60.4729   5
  10  13  -2 531.404 66.3206   5
  10  13  -2 624.158 69.1083   6
  10  13  -1 447.297 78.3624  12
  10  13  -1 495.513 58.9597   5
 -10  13   1 516.976 54.4321   5
  10  13   0 270.565 67.0978  12
 -10  13   0 232.681 35.5904   5
  10  13   0 283.705 40.6252   5
  10  13   1 341.311 68.7484  12
 -10  13  -1 307.814 43.2340   5
  10  13   1 385.081 46.7948   5
 -10  13  -1 387.031 64.7363   7
  10  13   2 363.870 72.4213  12
 -10  13  -2 463.361 58.3852   5
  10  13   2 597.265 60.7379   5
 -10  13  -2 530.934 81.1639   7
  10  13   3 44.9589 40.8353  12
 -10  13  -3 82.5451 43.2455   7
 -10  13  -3 79.0107 31.6088   5
  10  13   4 120.266 46.1722  12
 -10  13  -4 277.744 49.3844   5
 -10  13  -4 211.857 62.5245   7
 -10  13  -5 55.6450 40.1030   5
 -10  13  -5 72.1459 43.4914   7
 -10  13  -6 146.669 47.4357   5
 -10  13  -7 635.276 79.1440   5
 -10  13  -8 301.952 40.6388   5
 -10  14   6 298.974 40.2692   9
  10  14  -5 942.559 107.265   5
  10  14  -4 1531.04 157.138   5
  10  14  -4 1540.88 152.888  12
  10  14  -4 1913.65 161.530   6
  10  14  -3 2263.85 214.826  12
  10  14  -3 2323.63 213.198   5
  10  14  -3 2671.63 215.790   6
  10  14  -2 1260.93 131.766  12
 -10  14   2 1246.83 111.789   5
  10  14  -2 1168.27 118.149   5
  10  14  -1 1348.96 141.149  12
 -10  14   1 1255.31 114.686   5
  10  14  -1 1296.91 120.223   5
 -10  14   0 19.3322 18.7666   5
  10  14   0-12.5377 23.3313   5
  10  14   0-23.2490 46.5672  12
  10  14   1 1392.38 138.846  12
  10  14   1 1392.65 119.490   5
 -10  14  -1 1157.87 114.668   5
  10  14   2 1244.16 134.864  12
  10  14   2 1519.83 123.410   5
 -10  14  -2 1230.36 118.637   5
 -10  14  -2 1071.13 142.141   7
  10  14   3 2531.26 213.796  12
 -10  14  -3 2263.21 203.616   5
 -10  14  -3 2287.99 232.609   7
  10  14   4 1569.98 147.528  12
 -10  14  -4 1448.46 170.457   7
 -10  14  -4 1550.10 146.220   5
 -10  14  -5 742.865 87.6660   5
 -10  14  -6 198.585 43.8581   5
 -10  14  -7 204.791 37.3334   5
 -10  14  -8 43.3237 14.8113   5
 -10  15   7 1321.48 111.240   9
 -10  15   6 1328.66 105.161   9
  10 -15   6 927.316 114.423  11
  10  15  -5 2.88855 27.1252   5
  10  15  -4 23.5849 30.7719   5
  10  15  -4 63.6134 39.0568  12
  10  15  -3 409.073 68.6780  12
  10  15  -3 400.794 56.9739   5
  10  15  -2 1305.47 135.463  12
  10  15  -2 1217.34 118.201   5
 -10  15   2 1226.32 112.725   5
  10  15  -1 527.826 84.5267  12
  10  15  -1 546.917 63.0129   5
 -10  15   1 527.808 58.3270   5
  10  15   0 285.389 70.8125  12
 -10  15   0 323.462 40.9024   5
  10  15   0 276.987 43.3484   5
 -10  15  -1 567.938 62.9894   5
  10  15   1 632.567 67.7047   5
  10  15   2 1151.07 129.671  12
 -10  15  -2 1110.33 110.247   5
  10  15   2 1334.40 115.983   5
  10  15   3 288.311 61.2956  12
 -10  15  -3 265.787 41.8618   5
 -10  15  -3 255.443 61.1858   7
 -10  15  -4 10.2820 23.5361   5
  10  15   4 30.0854 37.5719  12
 -10  15  -5 31.1398 27.9938   5
 -10  15  -6 963.622 95.8084   5
 -10  15  -7 1281.81 111.660   5
 -10  16   7 236.330 26.9817   9
  10 -16   6 190.571 44.1221  11
 -10  16   6 274.607 31.9546   9
  10  16  -4 214.291 51.9727  12
  10  16  -4 326.821 47.3398   5
  10  16  -3 486.879 74.2979  12
  10  16  -3 457.311 60.0938   5
  10  16  -2 586.781 87.2877  12
 -10  16   2 509.865 59.1353   5
  10  16  -2 568.769 64.7628   5
  10  16  -1 1606.32 156.403  12
  10  16  -1 1399.74 128.558   5
 -10  16   1 1346.02 124.378   5
 -10  16   0 116.050 27.5729   5
  10  16   0 129.258 31.5364   5
  10  16   0 130.725 58.3982  12
 -10  16  -1 1448.51 130.380   5
  10  16   1 1515.24 134.811   5
  10  16   2 514.748 82.0351  12
  10  16   2 398.405 56.4886   5
 -10  16  -2 536.256 57.5277   5
  10  16   3 650.905 82.6979  12
 -10  16  -3 543.965 64.0020   5
 -10  16  -4 270.787 42.3382   5
 -10  16  -5 347.896 47.3888   5
 -10  16  -6 248.943 35.6883   5
 -10  16  -7 153.987 20.9777   5
  10 -17   6 344.369 50.8895  11
 -10  17   6 421.977 39.4786   9
 -10  17   5 128.622 22.0277   9
  10  17  -4 23.8706 36.5365  12
  10  17  -3 479.685 71.3995  12
  10  17  -3 429.959 54.3140   5
  10  17  -2 100.567 55.9137  12
  10  17  -2 96.8248 27.8834   5
  10  17  -1 287.693 71.6134  12
  10  17  -1 241.217 39.0036   5
 -10  17   1 258.452 38.1227   5
  10  17   0 272.932 78.2992  12
 -10  17   0 335.337 43.5174   5
  10  17   0 350.628 47.1697   5
 -10  17  -1 299.351 39.7706   5
  10  17   1 265.446 41.7735   5
  10  17   2 123.135 54.1305  12
 -10  17  -2 163.317 30.5109   5
  10  17   3 429.535 69.9846  12
 -10  17  -3 423.816 50.5992   5
 -10  17  -4 23.0191 21.3517   5
 -10  17  -5 95.4118 24.1351   5
 -10  17  -6 348.712 37.5196   5
  10 -18   5 44.1042 33.9100  11
  10  18  -4 66.6641 34.9279  12
  10  18  -3 322.087 58.4681  12
  10  18  -2 306.680 67.8218  12
  10  18  -1 47.0477 55.4033  12
 -10  18   1 74.5314 22.3242   5
  10  18  -1 52.9127 23.6522   5
  10  18   0 236.596 66.3512  12
 -10  18   0 161.554 29.2732   5
  10  18   0 182.643 33.5994   5
  10  18   1 27.0077 22.8941   5
 -10  18  -1 73.3604 22.2352   5
  10  18   2 448.912 72.5848  12
 -10  18  -2 374.966 45.3361   5
  10  18   3 292.745 58.6727  12
 -10  18  -3 251.462 35.6494   5
 -10  18  -4 93.1857 22.5136   5
 -10  18  -5 7.21301 13.9865   5
  10  19  -3 388.214 58.8185  12
  10  19  -2 62.8572 46.8143  12
  10  19  -1 201.625 59.0665  12
  10  19   0 617.395 84.1432  12
 -10  19   0 463.720 52.1871   5
 -10  19  -1 202.466 31.0246   5
  10  19   2 57.4790 44.3703  12
 -10  19  -2 38.7246 16.9176   5
 -10  19  -3 420.103 44.5724   5
 -10  19  -4 103.332 19.6259   5
  10  20  -3 36.5542 30.2322  12
  10  20  -2 31.3120 37.4829  12
  10  20  -1 42.7928 44.7292  12
  10  20   0-39.5766 50.2738  12
 -10  20   0-10.8707 14.4532   5
  10 -20   0 2.83120 20.2902  11
 -10  20  -1 39.0915 16.4339   5
 -10  20  -2 20.8336 14.2141   5
  10  20   2 18.1251 39.1408  12
 -10  20  -3 33.6524 13.3679   5
  10 -21   1 390.598 46.9861  11
  10  21  -1 638.477 68.4199  12
  10  21   0 844.540 92.5210  12
  10  21   1 709.335 80.7229  12
  11   0   0 6.86190 18.4666   6
  11   0   1 22.1887 21.7743   6
  11   0  -1 33.9189 20.6017   6
  11   0  -2 8014.72 581.418   6
 -11   0   2 7386.76 571.359   1
  11   0   2 7223.63 572.610   1
  11   0  -3 12822.5 947.328   6
  11   0   3 11630.4 946.141   1
 -11   0   3 12294.3 943.991   1
  11   0  -4 706.936 69.8429   6
  11   0   4 567.413 71.7514   1
 -11   0   4 662.234 70.8163   1
  11   0  -5 1295.58 116.367   6
 -11   0   5 1245.99 120.636   1
  11   0   5 1151.12 123.689   1
  11   0   6 920.998 93.2226   4
  11   0  -6 974.422 94.9708   6
  11   0   6 898.533 105.777   1
 -11   0   6 933.205 101.163   1
  11   0  -7 441.251 59.1921   6
  11   0   7 544.406 63.6549   4
 -11   0   7 525.352 52.6430   8
 -11   0   7 406.157 65.6239   1
  11   0   7 517.430 75.3203   1
  11   0   8 138.012 37.0054   4
 -11   0   8 168.118 26.8096   8
 -11   0   9 42.7621 16.5467   8
 -11   0  10 758.389 71.2323  10
 -11   1  10 17.9802 14.2315  10
 -11   1   9 501.151 51.8962   8
  11  -1   8 2155.99 176.105   4
  11  -1   8 1620.56 189.606   1
 -11   1   8 1850.54 159.649   9
 -11   1   8 2184.81 166.227   8
  11   1  -7 3160.28 274.962   6
 -11   1   7 3216.66 285.290   1
  11  -1   7 3177.56 291.959   1
  11  -1   7 3342.37 272.976   4
 -11   1   7 3482.74 264.420   8
 -11   1   7 3173.77 259.594   9
  11   1  -6 3508.55 294.355   6
 -11   1   6 3664.36 303.839   1
  11  -1   6 3285.49 307.275   1
 -11   1   6 3529.42 279.671   9
  11  -1   6 3652.69 290.928   4
  11  -1   5 1158.78 121.599   1
 -11   1   5 1162.54 114.600   1
  11   1  -4 440.304 52.8697   6
 -11   1   4 445.237 54.4164   1
  11   1  -3 3854.39 296.072   6
 -11   1   3 3506.84 291.685   1
  11   1  -2 2083.09 176.554   6
 -11   1   2 2133.28 170.740   2
  11   1  -1 1366.63 118.466   6
  11  -1   1 1353.19 122.402   6
  11   1   0 640.181 63.1776   6
  11  -1   0 624.675 63.6306   6
  11  -1  -1 1477.96 126.565   6
  11  -1  -2 2230.28 186.211   6
 -11  -1   2 2253.69 178.692   1
  11  -1  -3 3708.55 292.425   6
 -11  -1   3 3780.92 292.379   1
  11   1   3 3390.55 289.354   1
  11  -1  -4 488.853 54.2713   6
 -11  -1   4 424.103 55.9520   1
  11   1   4 459.270 57.0877   1
  11  -1  -5 1241.49 113.869   6
 -11  -1   5 1162.55 119.136   1
  11   1   5 1274.26 123.855   1
  11  -1  -6 3518.80 289.201   6
 -11  -1   6 3532.63 301.073   1
  11   1   6 3479.09 305.004   1
 -11  -1   7 3529.11 272.846   8
  11   1   7 3201.08 299.822   1
 -11  -1   7 3251.04 293.350   1
 -11  -1   8 2064.34 166.544   8
  11   1   8 1847.24 196.771   1
 -11  -1   9 448.370 45.3013   8
 -11   1 -10 13.6450 22.0810   5
 -11  -1  10 13.5209 12.7219  10
 -11   2  10 356.165 41.5794  10
 -11   2   9 372.655 42.9742   8
  11   2  -8 118.286 32.8749   6
  11  -2   8 85.2394 39.4937   1
  11  -2   8 123.986 34.1719   4
 -11   2   8 163.941 28.6839   8
 -11   2   8 124.908 22.6786   9
  11   2  -7 196.606 40.8402   6
  11  -2   7 158.935 48.4540   1
 -11   2   7 161.368 44.9186   1
 -11   2   7 224.368 33.0058   8
 -11   2   7 241.530 30.8623   9
  11  -2   7 249.822 41.9175   4
 -11   2   6 345.513 55.5359   1
  11  -2   6 351.539 63.5841   1
 -11   2   6 319.791 37.4628   9
  11  -2   6 390.327 48.4568   4
 -11   2   5 659.561 76.8128   1
 -11   2   4 1014.86 98.4660   1
  11   2  -3 2676.55 221.218   6
  11   2  -2 3783.84 292.016   6
 -11   2   2 3501.11 289.455   2
  11   2  -1 5415.65 425.919   6
  11  -2   0 646.849 65.5700   6
  11  -2  -1 4684.14 370.128   6
  11  -2  -2 3877.94 308.044   6
  11   2   2 3829.28 305.949   2
  11  -2  -3 2551.69 199.779   6
  11   2   3 2255.06 196.327   1
  11  -2  -4 1131.86 100.592   6
  11   2   4 1003.96 103.005   1
  11  -2  -5 859.181 83.5101   6
  11   2   5 816.611 92.3822   1
  11   2   6 477.049 57.6188   4
  11  -2  -6 410.125 53.1087   6
  11   2   6 493.610 71.3655   1
 -11  -2   6 534.564 69.4971   1
 -11   2  -7 209.015 63.6067   7
 -11  -2   7 301.312 34.1781   8
 -11  -2   7 155.894 44.7896   1
  11   2   7 170.825 51.7626   1
 -11  -2   8 170.019 24.9459   8
 -11  -2   9 313.643 34.2851   8
 -11   2 -10 102.241 32.3105   5
 -11  -2  10 225.253 26.5894  10
 -11   3  10 113.009 23.5106  10
 -11   3   9 14.7986 18.0126   8
 -11   3   9 16.8036 13.0703   9
  11  -3   8 809.627 83.5899   4
  11   3  -8 701.108 87.6595   6
 -11   3   8 820.849 73.8494   9
 -11   3   8 931.001 80.7154   8
  11  -3   8 586.067 96.6651   1
  11  -3   7 464.611 80.0659   1
  11  -3   7 498.192 61.3478   4
 -11   3   7 539.937 56.4079   8
 -11   3   7 517.290 53.3395   9
  11  -3   6 1082.88 102.577   4
 -11   3   6 1126.28 94.3130   9
  11  -3   6 930.908 107.592  11
  11  -3   5-10.3940 31.8889  11
  11   3  -3 1150.11 106.561   6
 -11   3   3 1187.20 109.589   2
  11   3  -2 1013.05 90.1461   6
 -11   3   2 904.794 93.5267   2
  11  -3   0 413.211 50.2117   6
  11  -3  -1 537.409 55.6981   6
  11   3   1 492.579 57.1621   6
  11  -3  -2 1180.42 107.147   6
  11   3   2 1261.36 114.530   2
  11  -3  -3 1158.91 104.839   6
  11  -3  -4 79.3338 23.2172   6
  11   3   4 94.9739 25.8565   1
  11  -3  -5 1.84479 18.4849   6
  11   3   5-19.3545 19.0804   1
  11   3   6 1446.43 120.170   4
 -11  -3   6 1216.32 105.785   8
 -11  -3   6 1221.92 130.045   1
  11   3   6 1158.42 130.032   1
  11   3   7 602.683 69.5535   4
 -11   3  -7 450.433 95.1298   7
 -11  -3   7 591.154 55.2747   8
 -11  -3   7 480.419 75.3017   1
 -11  -3   8 650.785 64.8038   8
  11   3   8 966.004 85.5936   4
 -11   3  -9 23.8680 25.1628   5
 -11   3 -10 119.846 37.7071   5
 -11  -3  10 169.248 22.5655  10
 -11   4   9 236.793 30.1109   9
 -11   4   9 264.617 34.8448   8
 -11   4   8 219.415 31.4284   9
 -11   4   8 219.285 34.1174   8
  11  -4   8 192.327 37.9091   4
  11  -4   7 592.923 65.6017   4
 -11   4   7 590.193 60.6580   8
 -11   4   7 576.189 58.8725   9
 -11   4   7 589.442 89.1807   2
  11  -4   7 404.316 80.5516   1
  11  -4   6 288.555 40.0779   4
  11  -4   6 184.347 48.0485  11
  11  -4   5 30.1280 34.6805  11
 -11   4   4 321.660 50.7644   2
  11   4  -3 138.282 28.3068   6
 -11   4   3 78.1191 27.8879   2
  11   4  -2 631.120 62.2696   6
 -11   4   2 508.379 73.0817   2
  11   4   0 205.966 33.6827   6
  11   4   1 782.576 79.8816   6
  11  -4  -1 823.405 78.9675   6
  11  -4  -2 609.750 61.2041   6
  11   4   2 662.451 77.1929   6
  11   4   2 504.372 75.6046   2
  11  -4  -3 154.267 26.2305   6
  11   4   3 95.0041 28.7339   2
  11  -4  -4 303.361 39.2258   6
  11   4   4 392.639 56.9733   2
  11   4   6 301.105 45.4052   4
 -11   4  -7 329.935 84.6280   7
  11   4   7 636.852 67.6298   4
  11   4   8 213.968 41.2846   4
 -11   4  -9 100.375 33.3927   5
 -11   4 -10 12.3988 31.9143   5
 -11  -4  10 93.9439 15.3924  10
 -11   5  10 12.0416 12.2776  10
 -11   5   9 289.539 38.9141   8
 -11   5   9 318.599 38.2625  10
 -11   5   9 303.181 35.6434   9
  11  -5   8 513.861 60.0770   4
 -11   5   8 473.197 57.0434   8
 -11   5   8 516.370 56.2402   9
  11  -5   7 415.672 50.9121   4
 -11   5   7 380.537 46.5102   8
 -11   5   7 327.024 45.3390   9
 -11   5   7 260.004 65.3544   2
 -11   5   6 275.591 61.3551   2
  11  -5   6 268.595 39.6605   4
  11  -5   6 191.603 48.6762  11
  11  -5   5 23.0942 35.1467  11
 -11   5   5 40.8019 30.2080   2
 -11   5   4 78.6591 33.1989   2
 -11   5   3 555.442 72.2272   2
 -11   5   2 37.6001 41.9462   2
  11   5  -1 595.578 62.5976   6
  11   5   0 1996.91 168.755   6
  11   5   1 524.491 59.7337   6
  11  -5  -2 54.6895 21.4090   6
  11   5   2 74.8519 34.5219   6
  11   5   2 49.6860 46.4775   2
  11  -5  -3 548.576 55.2340   6
  11   5   3 499.638 71.3267   2
  11   5   4 52.8919 30.8094   2
  11   5   5 37.5464 30.7537   2
  11   5   6 292.909 44.3398   4
  11   5   6 287.711 64.5500   2
  11   5   7 390.191 52.1104   4
 -11   5  -7 260.005 72.8355   7
  11   5   7 349.127 76.0917   2
 -11   5  -8 165.227 45.6930   5
  11   5   8 523.633 53.6891   4
 -11   5  -9 146.917 47.0813   5
 -11  -5   9 280.823 30.0179  10
 -11   5 -10 2.59231 32.1283   5
 -11  -5  10 8.13701 8.12761  10
 -11   6  10 95.7323 18.2845  10
 -11   6   9 2.93771 15.2863   8
 -11   6   9 8.44298 14.8981   9
 -11   6   9 24.4322 15.1811  10
 -11   6   8 59.9776 22.7688   8
 -11   6   8 37.4825 23.7452   9
  11   6  -8 27.3842 39.9293   5
  11   6  -7 197.018 53.3964   5
  11  -6   7 160.916 32.0371   4
  11  -6   7 65.8717 39.8157  11
 -11   6   7 126.123 29.9321   9
 -11   6   6 226.797 62.5471   2
  11  -6   6 247.715 38.1453   4
  11  -6   6 135.743 47.3069  11
 -11   6   5 64.8635 42.3608   2
  11   6  -5 152.170 41.2827   5
  11  -6   5 114.921 26.8665   4
  11  -6   5 67.1658 39.1895  11
 -11   6   4 297.895 57.7313   2
 -11   6   3 793.732 101.968   2
  11   6  -2 2093.66 161.825   6
 -11   6   2 1403.34 181.632   2
  11   6  -1 943.918 89.1517   6
  11   6   0 634.908 66.6711   6
  11   6   1 860.589 85.6269   6
  11   6   2 2703.74 203.673   6
  11   6   2 1587.04 209.179   2
  11   6   3 754.708 101.104   2
  11   6   4 368.011 65.4842   2
  11   6   5 59.0138 25.0644   4
  11   6   5 130.149 47.1433   2
 -11   6  -6 95.3763 40.7220   5
  11   6   6 156.234 34.0934   4
  11   6   6 100.768 49.4114   2
 -11   6  -7 58.9756 39.1314   5
  11   6   7 130.820 31.9282   4
 -11   6  -7 57.4379 43.0316   7
  11   6   7 99.7006 50.9276   2
 -11   6  -8 14.4419 39.5832   5
 -11   6  -9-20.8484 39.2738   5
 -11  -6   9 12.1368 10.6073  10
 -11   7   9 81.2355 18.4136  10
 -11   7   9 57.7317 19.4427   9
 -11   7   8 876.296 86.2058   9
  11  -7   7 3442.61 256.477   4
 -11   7   7 3020.44 256.030   9
  11  -7   6 936.544 117.459  11
  11  -7   6 1179.12 107.628   4
 -11   7   6 1196.48 153.476   2
  11  -7   5 555.814 60.3009   4
  11   7  -5 701.106 95.3803   5
 -11   7   4 394.050 77.2452   2
  11   7  -3 1249.08 106.089   6
 -11   7   3 750.298 126.297   2
  11   7  -2 3284.78 268.590   6
  11   7  -1 1119.29 96.7682   6
 -11   7   1 928.278 91.9328   3
  11   7   0 559.721 58.3218   6
 -11   7   0 473.194 55.3171   3
  11   7   1 859.630 78.3798   6
 -11   7  -1 627.197 68.0206   3
  11   7   2 3653.99 308.940   6
  11   7   3 1067.14 140.686   2
  11   7   4 341.105 73.1358   2
  11   7   5 510.225 54.8819   4
  11   7   5 307.427 79.9307   2
  11   7   6 1357.20 97.5757   4
  11   7   6 1123.09 144.482   2
  11   7   7 3216.22 188.654   4
 -11   7  -7 2738.83 240.847   7
  11   7   7 2333.66 247.268   2
 -11   7  -8 409.746 79.0597   5
 -11   7  -9-22.4164 41.2378   5
 -11   8   9 282.281 36.1297   9
 -11   8   9 304.890 36.2581   8
 -11   8   8 317.988 37.1818  10
 -11   8   8 338.630 41.2609   8
 -11   8   8 275.357 43.8201   9
  11   8  -7 1252.17 112.634   6
 -11   8   7 1326.46 95.3991   8
 -11   8   7 1072.38 98.3078   9
 -11   8   6 269.265 81.5291   2
  11  -8   6 342.471 44.8772   4
  11   8  -6 359.692 88.5922   5
  11  -8   6 226.826 54.3574  11
 -11   8   5 222.882 73.6939   2
  11   8  -5 227.244 78.8531   5
 -11   8   4 2158.69 211.797   2
  11   8  -4 1378.14 176.870   5
  11   8  -3 2985.34 228.949   6
 -11   8   3 1976.65 259.675   2
  11   8  -2 3796.79 308.923   6
  11   8  -1 2736.38 227.963   6
  11   8   0 689.583 71.5135   6
  11   8   1 2391.02 203.869   6
  11   8   3 1948.07 224.068   2
  11   8   4 2000.52 228.903   2
  11   8   4 1897.86 184.313  11
  11   8   5 242.750 82.5627   2
  11   8   5 292.831 38.8493   4
 -11   8  -5 208.926 62.0099   5
  11   8   6 141.798 68.1627   2
 -11   8  -6 130.903 52.5550   7
  11   8   6 209.975 33.3304   4
 -11   8  -6 64.6310 66.6379   5
  11   8   7 880.058 145.491   2
  11   8   7 1033.24 78.5348   4
 -11   8  -7 818.671 120.352   7
 -11   8  -8 48.8562 54.0079   5
 -11   9   9 173.321 24.2574   8
 -11   9   9 142.180 25.7744   9
 -11   9   8 693.851 64.5898   8
 -11   9   8 578.064 69.6965   9
  11   9  -7 1893.60 315.225   5
 -11   9   7 4900.28 296.027   8
 -11   9   7 3745.92 298.329   9
  11  -9   7 3012.58 298.644  11
 -11   9   6 1693.41 234.721   2
  11   9  -6 1451.88 207.995   5
 -11   9   5 536.419 114.180   2
  11   9  -5 117.976 88.0038   5
  11   9  -4 293.305 45.1329   6
 -11   9   4 172.072 72.6749   2
  11   9  -4 301.945 79.3156   5
  11   9  -3 799.302 74.7501   6
 -11   9   3 320.446 95.7455   2
  11   9  -2 2120.25 182.602   6
  11   9  -1 1543.61 138.084   6
  11   9   0 243.719 38.0214   6
  11   9   1 1139.18 145.350  11
  11   9   1 1575.89 132.071   6
  11   9   2 1337.43 144.366  11
  11   9   3 361.219 97.0944   2
  11   9   3 508.638 82.1663  11
  11   9   4 100.318 75.6331   2
  11   9   4 101.762 39.0992  12
  11   9   5 471.024 124.171   2
  11   9   5 755.863 60.3225   4
  11   9   6 1857.85 260.182   2
 -11   9  -6 2264.13 212.383   7
 -11   9  -7 677.206 116.443   5
 -11   9  -8-28.8882 51.1153   5
 -11   9  -9 29.4586 31.2439   5
 -11  10   9 60.5151 15.3687   8
 -11  10   9 53.4141 18.3483   9
 -11  10   8 99.1971 21.5052   8
 -11  10   8 98.9138 28.3083   9
  11  10  -7 677.042 121.500   5
 -11  10   7 861.270 77.9918   8
 -11  10   7 749.292 84.2862   9
  11  10  -6 193.997 84.2251   5
  11  10  -6 176.074 45.0472   6
  11 -10   6 334.935 60.5611  11
 -11  10   6 264.096 35.6606   8
  11  10  -5 465.834 60.3681   6
  11  10  -5 438.848 97.8940   5
  11  10  -4 927.209 89.1875   6
  11  10  -4 827.425 111.485   5
  11  10  -3 1507.43 146.896   5
  11  10  -3 1164.47 134.135  12
  11  10  -3 1666.89 136.962   6
  11  10  -2 4143.96 338.133   6
  11  10  -1 2106.27 181.936   6
  11  10   0 44.9452 23.9944   6
  11  10   1 2106.96 183.994   6
  11  10   3 939.432 102.580  12
  11  10   4 562.540 75.5771  12
  11  10   4 482.013 125.011   2
 -11  10  -5 144.388 67.2818   5
  11  10   5 171.991 96.5067   2
 -11  10  -6 218.606 62.6035   7
  11  10   6 13.0321 102.232   2
 -11  10  -7 512.248 93.5632   5
 -11  10  -8 30.0227 40.4040   5
 -11  11   9 137.431 21.4193   9
 -11  11   8 699.224 65.3526   8
 -11  11   8 765.856 73.0049   9
 -11  11   7 1058.79 93.7255   8
 -11  11   7 1046.30 102.170   9
  11 -11   6 549.891 83.7930  11
  11  11  -6 506.925 102.860   5
 -11  11   6 768.392 67.5979   8
  11  11  -6 655.530 84.1634   6
  11  11  -5 144.418 38.4023   6
  11  11  -5 159.919 62.8800   5
 -11  11   5 12.1952 78.6799   2
  11  11  -4 225.885 60.6575   5
  11  11  -4 164.082 45.2297  12
  11  11  -4 286.759 46.8503   6
  11  11  -3 740.698 89.6235   5
  11  11  -3 581.094 84.0553  12
  11  11  -3 880.571 84.9103   6
  11  11  -2 397.165 56.8448   5
  11  11  -2 395.996 67.8928  12
  11  11  -2 496.052 58.5950   6
  11  11  -1 909.605 89.1512   6
  11  11  -1 821.447 83.4240   5
  11  11   0 22.6352 19.4853   5
  11  11   0 15.5042 20.1216   6
  11  11   1 1093.90 98.7425   5
  11  11   2 463.481 76.2108  12
  11  11   2 591.930 60.0553   5
  11  11   3 719.049 86.0122  12
 -11  11  -4 131.355 45.3136   5
  11  11   4 120.083 39.8570  12
 -11  11  -5 112.442 51.5588   5
  11  11   5-12.7615 91.8705   2
 -11  11  -6 501.414 86.4476   7
 -11  11  -6 449.649 83.2722   5
 -11  11  -7 557.679 85.6371   5
 -11  11  -8 319.819 52.9888   5
 -11  12   8 8.00867 18.4106   9
 -11  12   7 33.0271 24.5994   9
  11  12  -6 190.578 58.4243   5
  11 -12   6 159.941 53.1012  11
 -11  12   6 252.932 32.2414   8
  11  12  -5-3.39424 24.4058   6
  11  12  -5-4.68959 44.0381   5
 -11  12   5 8.77354 14.3357   8
  11  12  -4 203.926 56.5854   5
  11  12  -4 278.866 53.8534  12
  11  12  -4 354.750 54.7892   6
  11  12  -3 540.909 72.1470   5
  11  12  -3 465.733 74.3260  12
  11  12  -3 598.798 69.9492   6
  11  12  -2 1066.58 122.211  12
  11  12  -2 1091.37 110.175   5
 -11  12   2 1141.03 102.242   5
  11  12  -2 1255.12 115.035   6
  11  12  -1 362.620 72.0930  12
  11  12  -1 425.904 55.7343   6
  11  12  -1 437.321 52.7473   5
  11  12   0 68.4352 23.2150   5
  11  12   0 82.0704 52.3329  12
  11  12   1 425.890 75.1643  12
  11  12   1 457.249 51.1439   5
  11  12   2 1048.69 124.809  12
  11  12   2 1352.01 114.035   5
 -11  12  -3 454.210 58.9529   5
  11  12   3 429.056 69.6787  12
 -11  12  -4 296.729 54.3243   5
 -11  12  -4 325.143 67.5446   7
  11  12   4 173.969 49.2610  12
 -11  12  -5 17.9696 41.1214   7
 -11  12  -5-11.7423 38.3063   5
 -11  12  -6 141.134 51.3451   5
 -11  12  -7 19.3040 32.9849   5
 -11  12  -8-12.5191 21.1726   5
 -11  13   8 47.6253 17.3943   9
  11 -13   6-24.7390 38.9298  11
  11  13  -5 145.644 46.6575   5
  11  13  -4 24.4247 34.7103   5
  11  13  -4-18.9816 35.7224  12
  11  13  -4 35.7392 29.1935   6
  11  13  -3 258.873 50.7182   5
  11  13  -3 263.307 58.2451  12
  11  13  -3 393.905 55.0894   6
  11  13  -2 150.227 37.2037   5
 -11  13   2 129.755 27.1999   5
  11  13  -2 148.983 54.6888  12
  11  13  -2 179.121 36.3835   6
  11  13  -1 163.251 33.6963   5
 -11  13   1 165.493 28.6598   5
  11  13  -1 227.132 60.2071  12
 -11  13   0 12.3541 16.7111   5
  11  13   0-5.63028 19.6378   5
  11  13   0 3.77512 51.2032  12
 -11  13  -1 171.989 29.6232   5
  11  13   1 187.101 32.0785   5
 -11  13  -1 156.606 43.8703   7
  11  13   1 137.969 58.1057  12
 -11  13  -2 131.357 29.3975   5
  11  13   2 153.973 32.0774   5
 -11  13  -2 75.5232 39.3893   7
  11  13   2 94.4088 49.5469  12
 -11  13  -3 223.487 40.9380   5
 -11  13  -3 299.498 65.4573   7
  11  13   3 202.803 53.9233  12
 -11  13  -4-11.4771 28.3245   5
 -11  13  -4-23.4651 38.2905   7
  11  13   4-8.29330 39.0287  12
 -11  13  -5 161.160 43.8031   5
 -11  13  -6-3.09973 31.5178   5
 -11  13  -7 43.0783 28.5599   5
  11 -14   6 51.1808 36.9750  11
  11  14  -5 70.7386 34.9638   5
  11  14  -4 245.002 48.1338   5
  11  14  -4 197.430 51.0904  12
  11  14  -3 148.952 38.0815   5
  11  14  -3 123.068 50.8618  12
  11  14  -3 172.489 38.9793   6
  11  14  -2 520.055 82.8900  12
 -11  14   2 528.278 57.6466   5
  11  14  -2 560.741 64.1188   5
  11  14  -1 550.745 87.7532  12
 -11  14   1 517.014 56.0871   5
  11  14  -1 551.568 62.2382   5
 -11  14   0 105.624 24.4781   5
  11  14   0 149.657 30.0437   5
  11  14   0 51.3974 54.7752  12
  11  14   1 618.795 89.1122  12
  11  14   1 606.568 63.4571   5
 -11  14  -1 523.536 58.7914   5
  11  14   2 545.055 84.9661  12
  11  14   2 640.170 66.1899   5
 -11  14  -2 539.788 62.9028   5
 -11  14  -2 602.271 91.1779   7
  11  14   3 125.859 49.7532  12
 -11  14  -3 145.881 32.9467   5
 -11  14  -3 186.800 56.9654   7
  11  14   4 139.404 49.8743  12
 -11  14  -4 181.742 53.5402   7
 -11  14  -4 281.349 43.9632   5
 -11  14  -5 65.7791 29.2648   5
 -11  14  -6 37.3961 26.4080   5
 -11  14  -7 70.1715 22.3959   5
 -11  15   7 397.098 41.1158   9
  11 -15   6 247.790 50.3588  11
 -11  15   6 406.106 42.6606   9
  11  15  -4 85.6586 42.8226  12
  11  15  -4 130.165 36.3281   5
  11  15  -3 254.252 58.8356  12
  11  15  -3 217.456 40.8838   5
  11  15  -2 297.080 69.2137  12
 -11  15   2 323.563 42.1660   5
  11  15  -2 347.934 49.2731   5
  11  15  -1 51.5612 51.8560  12
 -11  15   1 41.8537 19.9547   5
  11  15  -1 41.5903 25.1992   5
  11  15   0 210.597 68.0480  12
  11  15   0 232.905 37.2120   5
 -11  15   0 151.800 28.7257   5
  11  15   1 44.2680 24.1333   5
 -11  15  -1 39.4667 21.1813   5
  11  15   2 241.607 65.3398  12
 -11  15  -2 292.320 40.9053   5
  11  15   2 325.066 45.4431   5
 -11  15  -3 233.887 36.9172   5
  11  15   3 113.646 50.5131  12
 -11  15  -4 102.805 29.0948   5
 -11  15  -5 88.5185 28.3110   5
 -11  15  -6 220.876 34.9346   5
 -11  16   6 390.953 39.2885   9
  11 -16   6 282.422 50.1522  11
  11  16  -4 230.546 48.2143  12
  11  16  -3 1786.27 170.868  12
  11  16  -3 1864.04 161.104   5
  11  16  -2 1731.78 166.844  12
  11  16  -2 1611.47 145.440   5
  11  16  -1 861.097 106.977  12
  11  16  -1 744.706 74.6130   5
 -11  16   1 641.093 69.0744   5
  11  16   0 1002.30 111.917  12
  11  16   0 808.170 80.1062   5
 -11  16   0 737.234 75.4851   5
 -11  16  -1 703.758 69.2738   5
  11  16   1 681.526 72.5224   5
  11  16   2 1732.96 165.856  12
 -11  16  -2 1630.92 143.341   5
  11  16   3 1987.90 179.489  12
 -11  16  -3 1877.48 163.262   5
 -11  16  -4 289.195 41.2238   5
 -11  16  -5 234.790 35.9982   5
 -11  16  -6 246.250 31.7159   5
  11 -17   6 414.287 55.3611  11
 -11  17   6 539.817 46.5621   9
  11 -17   5 513.557 73.6113  11
 -11  17   5 630.123 56.4543   9
  11  17  -4 84.3708 40.9424  12
  11  17  -3 463.246 69.0958  12
  11  17  -2 317.458 67.4672  12
  11  17  -1 293.157 69.8168  12
 -11  17   1 215.079 31.5343   5
  11  17  -1 223.402 35.7953   5
  11  17   0 1688.13 176.091  12
 -11  17   0 1719.32 146.827   5
  11  17   0 1751.21 150.508   5
  11  17   1 265.518 39.2874   5
 -11  17  -1 237.382 33.4991   5
  11  17   2 327.997 63.9162  12
 -11  17  -2 263.863 36.8108   5
  11  17   3 589.728 76.5629  12
 -11  17  -3 477.137 53.9098   5
 -11  17  -4 70.2672 22.4529   5
 -11  17  -5 430.387 45.3209   5
  11 -18   5 152.065 39.0013  11
  11  18  -4 306.938 47.4840  12
  11  18  -3 1018.02 105.123  12
  11  18  -2 628.593 86.7236  12
  11  18  -1 279.919 65.6036  12
 -11  18   1 211.440 31.8043   5
  11  18   0 356.702 74.1206  12
 -11  18   0 315.820 39.6890   5
 -11  18  -1 259.606 34.1509   5
  11  18   2 748.573 87.5561  12
 -11  18  -2 544.093 57.4123   5
  11  18   3 972.671 98.5799  12
 -11  18  -3 826.834 77.9612   5
 -11  18  -4 310.215 35.5652   5
  11 -19   4 13.7873 31.1840  11
  11  19  -3 134.662 41.1238  12
  11  19  -2 209.543 52.2062  12
  11  19  -1 496.677 76.0514  12
  11  19   0 595.770 81.2756  12
 -11  19   0 374.581 43.1048   5
 -11  19  -1 356.208 39.8439   5
  11  19   2 296.978 53.3448  12
 -11  19  -2 188.837 27.6459   5
 -11  19  -3 169.988 24.3436   5
  11 -20   3 119.859 35.3521  11
  11  20  -3 106.121 32.7748  12
  11 -20   2 300.685 47.4360  11
  11  20  -2 320.782 52.6523  12
  11 -20   1 69.7241 29.0427  11
  11  20  -1 190.189 48.1106  12
  11 -20   0 11.9606 18.7874  11
  11  20   0 84.9888 45.8770  12
  11  20   2 385.940 59.1250  12
  12   0   0 2802.61 229.478   6
  12   0   1 115.370 30.0939   6
  12   0  -1 133.234 28.8441   6
  12   0  -2 4379.53 350.233   6
  12   0  -3 722.613 70.8941   6
  12   0   3 604.655 63.9486   1
  12   0  -4 164.479 31.4926   6
  12   0   4 175.260 33.3272   1
 -12   0   4 135.705 27.3845   1
  12   0  -5 288.406 41.5533   6
  12   0   5 240.716 45.9773   1
 -12   0   5 212.303 38.1517   1
  12   0   6 670.905 70.1359   4
  12   0  -6 589.165 67.9920   6
  12   0   6 497.108 75.7150   1
 -12   0   6 496.281 69.6384   1
  12   0  -7 77.2457 26.8432   6
  12   0   7 131.676 35.8184   4
 -12   0   7 90.0223 21.8163   8
 -12   0   8 402.752 46.3555   8
  12   0   8 445.531 59.8180   4
 -12   0   9 31.9130 14.5606   8
 -12   0  10 19.4474 15.3905  10
 -12   1  10 119.717 23.3630  10
 -12   1   9 49.5434 18.6199   8
  12  -1   8 17.4239 28.4807   4
 -12   1   8 17.3438 19.7576   8
 -12   1   8 10.9558 13.9323   9
  12  -1   7 553.498 64.6900   4
  12   1  -7 435.596 60.7803   6
  12  -1   7 347.467 70.8748   1
 -12   1   7 529.581 48.8811   9
 -12   1   7 453.398 52.0487   8
  12   1  -6 904.346 88.8765   6
  12  -1   6 656.600 93.8705   1
 -12   1   6 806.960 91.2258   1
  12  -1   6 841.329 86.2081   4
  12  -1   5 306.089 58.2087  11
  12   1  -5 559.950 61.0601   6
 -12   1   5 539.684 60.3204   1
  12  -1   5 391.990 62.5733   1
  12   1  -4 322.356 44.1433   6
 -12   1   4 276.454 39.1931   1
  12  -1   4 310.728 47.2720   1
  12   1  -3 2398.55 195.528   6
  12  -1   3 2233.03 192.680   1
  12   1  -2 1860.82 147.367   6
  12  -1   2 1612.87 135.046   1
  12   1  -1 678.389 65.5773   6
  12  -1   1 569.701 67.8871   6
  12   1   0 440.887 52.4145   6
  12  -1   0 492.693 54.2503   6
  12  -1  -1 568.453 60.3846   6
  12  -1  -2 1623.47 134.914   6
  12   1   2 1482.72 125.811   2
  12  -1  -3 2533.71 205.940   6
  12   1   3 2384.63 199.877   1
  12  -1  -4 360.549 45.5254   6
  12   1   4 336.459 46.0965   1
 -12  -1   4 305.596 42.9554   1
  12  -1  -5 500.580 56.8831   6
  12   1   5 461.133 62.5581   1
 -12  -1   5 380.927 54.7592   1
  12  -1  -6 936.650 92.6898   6
  12   1   6 860.432 103.932   1
 -12  -1   7 510.375 51.3868   8
  12   1   7 377.804 71.6814   1
 -12  -1   8 26.2752 16.0782   8
 -12  -1   9 68.4856 16.6573   8
 -12  -1  10 82.7563 18.7778  10
 -12   2  10 423.222 46.2449  10
 -12   2   9 301.229 37.8499   8
  12  -2   8 273.656 45.9756   4
 -12   2   8 268.405 33.5516   9
 -12   2   8 373.030 42.7837   8
  12   2  -7 677.484 78.2664   6
  12  -2   7 563.483 88.8233   1
  12  -2   7 686.836 75.6153   4
 -12   2   7 655.253 67.6219   8
 -12   2   7 713.483 64.0741   9
  12  -2   6 297.146 46.4644   4
  12  -2   6 306.474 58.1534   1
 -12   2   6 236.784 46.4045   1
  12   2  -6 314.515 48.1885   6
  12  -2   6 241.820 52.3255  11
 -12   2   6 313.876 34.4024   9
  12  -2   5 584.117 81.5709  11
  12   2  -5 800.366 80.5061   6
 -12   2   5 779.231 80.9562   1
  12   2  -4 1643.63 146.434   6
  12   2  -3 1377.96 121.566   6
 -12   2   3 1311.56 119.090   2
  12   2  -2 1448.70 128.090   6
  12   2  -1 1758.72 150.591   6
  12  -2   0 801.923 79.0062   6
  12  -2  -1 1444.07 126.619   6
  12  -2  -2 1150.06 98.5742   6
  12   2   2 978.002 95.6913   2
  12  -2  -3 1193.16 109.620   6
  12  -2  -4 1528.15 131.180   6
  12   2   4 1365.02 130.162   1
  12  -2  -5 972.774 95.8320   6
 -12  -2   5 971.299 101.629   1
  12   2   5 1017.93 105.399   1
  12   2   6 383.062 52.5993   4
  12   2   6 319.057 58.7128   1
 -12  -2   7 717.290 63.7966   8
  12   2   7 454.721 80.2834   1
 -12  -2   8 233.915 29.6620   8
 -12  -2   9 297.361 32.4957   8
 -12  -2  10 345.867 37.6838  10
 -12   3  10 746.779 70.6301  10
 -12   3   9 307.253 39.2403   8
 -12   3   9 297.187 32.3506   9
  12  -3   8 499.289 64.6469   4
 -12   3   8 561.320 54.6646   9
 -12   3   8 605.796 63.0583   8
  12  -3   7 636.421 98.1467   1
  12   3  -7 783.119 89.8751   6
  12  -3   7 903.114 87.8331   4
 -12   3   7 872.439 80.3355   8
 -12   3   7 811.088 75.4421   9
  12  -3   6 533.786 86.3466   1
  12  -3   6 560.578 77.9899  11
  12  -3   6 737.380 74.0933   4
 -12   3   6 663.581 62.7524   9
  12   3  -6 693.268 77.5114   6
  12  -3   5 339.007 59.1093  11
  12   3  -5 478.302 56.6056   6
  12   3  -4 554.509 63.4024   6
 -12   3   4 569.543 67.5801   2
  12   3  -3 13.3907 19.5088   6
 -12   3   3 27.4526 20.0571   2
  12   3  -2 990.362 93.6941   6
  12   3  -1 5948.42 469.045   6
  12  -3   0 3801.79 307.808   6
  12  -3  -1 5734.14 450.107   6
  12   3   1 5658.06 452.467   6
  12  -3  -2 1035.83 91.9555   6
  12   3   2 885.537 101.903   2
  12  -3  -3 43.6575 20.7654   6
  12   3   3 15.2712 19.5172   2
  12  -3  -4 612.227 65.1876   6
  12  -3  -5 470.098 54.6938   6
 -12  -3   6 702.748 65.8618   8
  12   3   6 778.375 80.9254   4
 -12  -3   7 870.660 79.7498   8
  12   3   7 939.270 95.4163   4
 -12  -3   8 437.219 44.7712   8
  12   3   8 481.384 62.9520   4
 -12   3  -9 116.009 35.0345   5
 -12  -3  10 575.656 53.6480  10
 -12   4   9 401.651 46.5970   8
 -12   4   9 389.730 39.8863   9
  12  -4   8 343.387 49.6266   4
 -12   4   8 390.379 42.6530   9
 -12   4   8 385.619 48.8188   8
  12  -4   7 111.465 43.3644   1
  12   4  -7 175.056 41.6208   6
  12  -4   7 194.542 37.3163   4
 -12   4   7 181.959 31.9464   8
 -12   4   7 168.925 28.0095   9
  12  -4   6 922.826 87.8094   4
  12  -4   6 705.775 93.8604  11
  12   4  -6 933.110 94.9640   6
  12  -4   5 834.114 97.4216  11
 -12   4   5 973.891 105.586   2
  12   4  -4 2365.81 197.415   6
 -12   4   4 2198.90 203.474   2
  12   4  -3 376.130 46.5495   6
 -12   4   3 304.618 51.3004   2
  12   4  -2 1508.97 116.650   6
 -12   4   2 891.386 123.961   2
  12   4   0 623.906 65.4725   6
  12   4   1 1502.49 135.986   6
  12  -4  -1 1549.91 135.052   6
  12  -4  -2 1437.22 121.435   6
  12   4   2 1636.87 136.755   6
  12  -4  -3 514.216 53.9064   6
  12   4   3 437.864 62.4555   2
  12  -4  -4 1958.84 169.573   6
  12   4   4 2162.12 187.797   2
  12   4   5 1231.81 132.336   2
  12   4   6 1249.75 118.755   4
  12   4   6 1273.76 142.942   2
  12   4   7 210.952 40.9035   4
 -12   4  -7 74.5733 56.7150   7
  12   4   7 196.013 55.7100   2
 -12   4  -8 34.0997 33.3204   5
  12   4   8 474.073 50.3504   4
 -12   4  -9 84.2787 36.8521   5
 -12  -4  10 345.065 34.6160  10
 -12   5  10 185.127 25.3834  10
 -12   5   9 277.202 38.7193   8
 -12   5   9 301.428 33.9986   9
 -12   5   9 361.000 40.3291  10
  12  -5   8 1050.31 106.428   4
 -12   5   8 1290.63 108.895   8
 -12   5   8 1148.86 102.226   9
  12  -5   7 653.066 66.8396   4
  12   5  -7 838.131 86.5965   5
  12  -5   7 423.764 81.8816   1
  12   5  -7 612.305 74.8371   6
  12  -5   7 359.443 69.3449  11
 -12   5   7 550.359 61.1973   8
 -12   5   7 582.451 60.3312   9
  12  -5   6 664.501 74.7482   4
  12  -5   6 553.783 83.5267  11
  12  -5   5 847.423 99.4110  11
 -12   5   5 972.182 110.542   2
  12  -5   4 240.887 52.5378  11
  12   5  -4 376.413 48.0094   6
 -12   5   4 302.609 54.5738   2
 -12   5   3 449.670 52.0109   3
 -12   5   3 367.554 66.2169   2
 -12   5   2 427.675 75.1766   2
  12   5  -1 1050.60 99.0560   6
  12   5   0 1245.75 113.003   6
  12   5   1 1060.46 101.610   6
  12  -5  -2 852.266 78.5222   6
  12   5   2 1005.46 95.5338   6
  12  -5  -3 459.064 47.9869   6
 -12   5  -3 378.106 45.2063   3
  12   5   3 416.088 68.6251   2
  12   5   4 319.653 56.8103   2
  12   5   5 1056.65 123.462   2
  12   5   6 1039.27 101.161   4
  12   5   6 992.491 126.877   2
 -12   5  -7 164.567 49.9730   5
 -12   5  -7 362.924 82.9634   7
  12   5   7 407.524 79.9279   2
  12   5   8 1193.77 87.5792   4
 -12   5  -8 396.343 78.1296   5
 -12   5  -9 61.2786 42.9652   5
 -12  -5   9 239.669 26.5255  10
 -12  -5  10 132.229 16.6260  10
 -12   6  10 759.166 67.2204  10
 -12   6   9 76.7045 18.8981  10
 -12   6   9 63.3523 21.6467   8
 -12   6   9 82.9290 18.9598   9
 -12   6   8 68.6281 24.8683   8
 -12   6   8 45.3586 19.7183   9
  12  -6   7 644.690 68.5222   4
  12   6  -7 771.284 97.2068   5
  12   6  -7 590.141 76.9255   6
  12  -6   7 439.450 74.6313  11
 -12   6   7 662.193 66.3692   9
  12  -6   6 1235.68 112.171   4
  12   6  -6 1292.73 122.652   6
  12  -6   5 494.841 75.2049  11
 -12   6   5 650.196 90.9508   2
  12   6  -4 1393.90 122.238   6
 -12   6   4 1060.89 136.873   2
 -12   6   3 1852.58 188.971   2
  12   6  -2 2601.17 202.814   6
 -12   6   2 2245.60 198.304   3
  12   6  -1 1108.33 98.4024   6
 -12   6   1 955.656 95.2848   3
  12   6   0-1.85642 19.2906   6
 -12   6   0 12.5945 21.5116   3
  12   6   1 1183.94 103.429   6
 -12   6  -1 941.275 95.5466   3
  12   6   2 3072.56 213.387   6
 -12   6  -2 1995.56 185.609   3
  12   6   3 2312.05 229.072   2
  12   6   4 1171.42 136.125   2
  12   6   5 673.773 100.507   2
  12   6   6 1239.19 112.279   4
  12   6   6 1051.08 143.941   2
 -12   6  -7 533.802 99.2328   7
  12   6   7 689.043 65.2569   4
 -12   6  -8 3.53372 37.4822   5
 -12   6  -9-30.9788 39.9788   5
 -12  -6   9 45.2687 11.8514  10
 -12   7   9 23.0425 13.8120  10
 -12   7   9 23.3010 14.6481   9
 -12   7   8 500.315 55.4480   9
  12  -7   7 409.221 50.0634   4
  12   7  -7 415.133 87.2862   5
  12   7  -7 487.467 66.2996   6
  12  -7   7 255.562 59.5981  11
 -12   7   7 424.523 52.3898   9
  12   7  -6 972.845 128.884   5
  12  -7   6 1093.15 95.3934   4
  12   7  -6 1163.20 109.044   6
  12  -7   5 1358.49 143.112  11
  12   7  -5 1550.57 140.430   6
 -12   7   5 1093.81 163.526   2
  12  -7   5 1583.20 130.804   4
 -12   7   4 672.318 106.914   2
  12   7  -3 1761.93 135.359   6
 -12   7   3 886.490 151.895   2
  12   7  -2 1178.36 109.632   6
  12   7  -1 985.110 88.2660   6
 -12   7   1 784.512 82.3909   3
  12   7   0 55.1158 24.1261   6
 -12   7   0 52.4433 21.3991   3
  12   7   1 927.259 87.9611   6
 -12   7  -1 752.318 78.3209   3
  12   7   2 1069.84 112.626   6
  12   7   3 1061.82 145.345   2
  12   7   4 805.668 102.292  11
  12   7   4 803.912 123.195   2
  12   7   5 1505.79 127.283   4
  12   7   5 1126.42 165.803   2
  12   7   6 1165.15 101.785   4
  12   7   6 743.333 135.057   2
 -12   7  -7 457.881 88.1547   7
  12   7   7 432.816 51.4326   4
 -12   7  -8 37.1067 46.9535   5
 -12   8   9 42.2257 16.1561   9
 -12   8   8 60.6187 16.7036  10
 -12   8   8 44.7214 21.1509   8
 -12   8   8 8.43314 20.7031   9
  12  -8   7 1129.19 95.4730   4
 -12   8   7 1127.14 96.4045   8
 -12   8   7 890.513 97.4874   9
  12   8  -7 1141.01 112.416   6
  12  -8   6 62.8349 42.2789  11
  12  -8   6 141.391 28.3300   4
  12   8  -6 110.252 35.0594   6
  12  -8   5 37.8455 23.0712   4
  12   8  -5 6.19703 64.4299   5
 -12   8   5 17.7165 54.6656   2
  12   8  -4 143.339 33.4310   6
 -12   8   4 112.777 55.3653   2
  12   8  -3 152.817 30.8056   6
 -12   8   3 35.3028 42.6226   2
  12   8  -2 3280.67 271.136   6
  12   8  -1 737.096 76.7886   6
  12   8   0 43.9334 23.8760   6
  12   8   1 793.026 83.4556   6
  12   8   2 2312.11 218.631  11
  12   8   3 203.718 60.7524  11
  12   8   3 54.7448 66.2155   2
  12   8   4 136.952 51.6244  11
  12   8   4-8.79734 54.4642   2
  12   8   5 62.1493 22.8702   4
  12   8   5 159.323 85.8561   2
  12   8   6 81.8215 25.5222   4
 -12   8  -6 35.8994 53.9880   5
  12   8   6 129.804 73.0804   2
  12   8   7 1062.58 75.4568   4
 -12   8  -7 131.771 81.7978   5
 -12   8  -8 13.1960 48.5204   5
 -12   9   9 20.2706 14.8123   8
 -12   9   9 26.1399 14.9281   9
 -12   9   8 18.4515 16.7884   8
 -12   9   8 32.5014 22.8831   9
 -12   9   7 551.731 56.3721   8
 -12   9   7 425.885 60.5008   9
  12  -9   6 146.776 48.0266  11
  12   9  -5 321.351 52.5980   6
  12   9  -5 322.804 90.2720   5
  12   9  -4 591.323 68.2998   6
  12   9  -4 599.379 91.8632   5
  12   9  -3 518.183 62.6525   6
  12   9  -2 73.0756 26.8983   6
  12   9  -1 90.7198 27.4091   6
  12   9   0 121.573 29.4135   6
  12   9   1 120.675 59.3835  11
  12   9   1 143.132 34.1169   6
  12   9   2 21.9880 50.3120  11
  12   9   3 247.569 67.7592  11
  12   9   4 425.176 112.198   2
  12   9   4 412.917 62.9678  12
  12   9   5 142.982 87.3309   2
  12   9   5 300.905 38.8267   4
  12   9   6 148.509 29.0457   4
 -12   9  -6 176.384 55.4972   7
 -12   9  -7 25.8521 49.4208   5
 -12   9  -8 17.8345 37.0831   5
 -12  10   9 90.0416 17.0647   8
 -12  10   9 120.483 19.5696   9
 -12  10   8 351.898 38.9312   8
 -12  10   8 311.145 42.4786   9
 -12  10   7 303.118 38.6279   8
 -12  10   7 231.104 42.8365   9
  12  10  -6 487.092 96.0438   5
  12 -10   6 451.627 73.7283  11
 -12  10   6 642.423 59.8108   8
  12  10  -6 501.035 72.2561   6
  12  10  -5 258.566 72.9876   5
  12  10  -5 184.429 42.4496   6
  12  10  -4 69.7530 47.2870   5
  12  10  -4 83.3878 39.4235  12
  12  10  -4 156.659 36.7727   6
  12  10  -3 544.053 71.3991   5
  12  10  -3 657.522 69.1833   6
  12  10  -2 179.778 36.6913   6
  12  10  -1 973.622 97.5234   6
  12  10   0 228.234 38.8900   6
  12  10   1 856.361 90.1950   6
  12  10   3 407.501 64.8650  12
  12  10   4 75.8274 37.5813  12
  12  10   5 58.8100 76.8705   2
 -12  10  -6 486.628 85.6471   7
 -12  10  -6 382.741 78.6021   5
 -12  10  -7 243.032 58.6252   5
 -12  10  -8 112.396 37.1700   5
 -12  11   8 353.310 38.6267   8
 -12  11   8 404.654 45.1082   9
 -12  11   7 187.064 27.7871   8
 -12  11   7 150.606 34.9702   9
  12 -11   6-3.25684 40.4708  11
 -12  11   6 51.4377 20.0834   8
  12  11  -5 477.926 82.3799   5
  12  11  -5 439.015 63.6959   6
  12  11  -4 15.4405 38.7462   5
  12  11  -4 28.8514 36.6723  12
  12  11  -4 44.2387 27.6614   6
  12  11  -3 317.105 53.4300   5
  12  11  -3 282.278 58.7774  12
  12  11  -3 384.258 54.4115   6
  12  11  -2 208.246 60.5200  12
  12  11  -2 290.383 43.9118   5
  12  11  -2 360.468 49.5073   6
  12  11  -1 854.718 84.8541   6
  12  11  -1 727.125 75.4474   5
  12  11   0 2262.10 195.599   6
  12  11   2 252.420 60.4807  12
  12  11   2 319.582 41.2448   5
  12  11   3 316.037 59.2902  12
  12  11   4 42.3904 37.9519  12
 -12  11  -5 367.103 63.6788   5
 -12  11  -6 19.4048 39.7767   5
 -12  11  -7 82.5541 37.0507   5
 -12  12   8 176.896 27.3386   9
 -12  12   7 20.3528 21.2802   9
  12 -12   6 750.263 101.652  11
 -12  12   6 1084.22 89.2733   8
[truncated: 204,292 more chars]
